# Supplementary material for: Formation of ylidenehydrazines enabled by manganese-catalyzed acceptorless dehydrogenative coupling
Source: Royal Society of Chemistry journal article supplement (doi:10.1039/d3qo01890c), 2024-01-01

## **Formation of Ylidenehydrazines Enabled by Manganese-Catalyzed Acceptorless Dehydrogenative Coupling**

Fangchao Wang,<sup>b</sup> Ding Ding,<sup>b</sup> Chunyan Zhang,<sup>a\*</sup> & Guoying Zhang<sup>b\*</sup>

<sup>a</sup> *College of Ecology, Taiyuan University of Technology, Taiyuan 030001, China*

<sup>b</sup> *State Key Laboratory of Coal Conversion, Institute of Coal Chemistry, Chinese Academy of Sciences, Taiyuan 030001, China; University of Chinese Academy of Sciences, Beijing 100049, China*

E-mail: [zhangchunyan@tyut.edu.cn](mailto:zhangchunyan@tyut.edu.cn); [zhanggy@sxicc.ac.cn](mailto:zhanggy@sxicc.ac.cn)

# Contents

|                                                                  |            |
|------------------------------------------------------------------|------------|
| <b>1. General.....</b>                                           | <b>3</b>   |
| <b>2. Synthesis of NNP-ligands .....</b>                         | <b>4</b>   |
| <b>3. Screening of Reaction Parameters .....</b>                 | <b>13</b>  |
| <b>4. General Procedure for the Products .....</b>               | <b>23</b>  |
| <b>5. Characterization Data .....</b>                            | <b>24</b>  |
| <b>6. Mechanism Investigations.....</b>                          | <b>82</b>  |
| <b>7. Gram-Scale Synthesis .....</b>                             | <b>91</b>  |
| <b>8. Time-conversion-plot reaction.....</b>                     | <b>95</b>  |
| <b>9. Possible Reactions in Combination with Hydrazones.....</b> | <b>96</b>  |
| <b>10. References.....</b>                                       | <b>104</b> |
| <b>11. NMR Spectra.....</b>                                      | <b>104</b> |

## 1. General

**Experimental:** All reactions and manipulations with air sensitive compounds being present were performed under dry argon (Ar 5.0) or nitrogen (N<sub>2</sub> 5.0), using Schlenk and glove box techniques. Deuterated solvents were bought from Cambridge Isotope Laboratories, distilled accordingly, and stored over molecular sieves (3 Å). Other chemicals were purchased from commercial vendors and used without further purification. NMR spectra were collected on a Varian INOVA 300 and 400 MHz spectrometer. Chemical shifts ( $\delta$ ) are reported in ppm relative to residual solvent signal. Coupling constants (J) are given in Hz (coupling patterns: s: singlet, s\_br: broad singlet, d: doublet, t: triplet, q: quartet, m: multiplet). GC analyses were carried out using an Agilent Technologies 6890N system equipped with a Machinery-Nagel (MN) Optima 5 HT column (30 m, 320  $\mu$ m, 0.25  $\mu$ m) or an Agilent Technologies 6850 system equipped with a MN Optima 17 column (30 m, 320  $\mu$ m, 0.25  $\mu$ m). GC/MS analyses were carried out on an Agilent 7890A/MSD 5975C system equipped with a HP-5MS column (30 m, 320  $\mu$ m, 0.25  $\mu$ m). High resolution mass spectra (HRMS) were recorded on Bruker MicroTOF-QII mass (ESI). MN silica gel 60 (0.040 – 0.063 mm particle size) was used for flash column chromatography.

## 2. Synthesis of NNP-Ligands

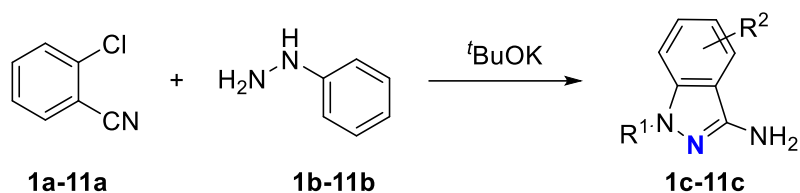

Using a nitrogen-filled glove box, an oven-dried pressure tube (38 mL volume) was charged with a magnetic stirring bar, base, hydrazines (**1b-11b**) and diglyme. After stirring of five minutes, nitriles (**1a-11a**) were added the mixture reaction. Then the seal tube was closed tightly with a teflon cap, removed from the glove box and immersed into a pre-heated oil bath (design temperature). After design time the reaction was cooled, quenched with half-saturated brine and extracted with dichloromethane (4 x 15 mL). The combined organic phase was dried over  $\text{Na}_2\text{SO}_4$  and concentrated. A small aliquot of the organic phase was analyzed by GC or GC-MS to monitor product formation. Purification of the remainder by column chromatography on silica gel gave the corresponding products **1c-11c** (pentane/ethyl ether = 15/1 – 5/1).<sup>[1]</sup>

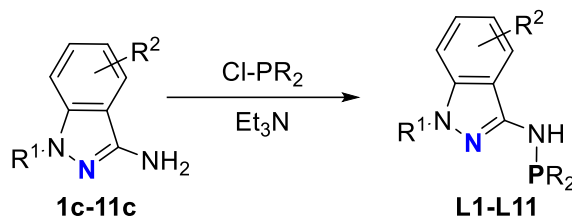

Using a nitrogen-filled glove box, an oven-dried pressure tube (38 mL volume) was charged with a magnetic stirring bar, catalyst, ligand, solvent, amines (**1c-11c**, 1.0 mmol),  $\text{Cl-PR}_2$  (1.2 mmol),  $\text{Et}_3\text{N}$  (1.5 mmol) and THF (2.0 mL). Then the seal tube was closed tightly with a teflon cap, removed from the glove box and immersed into a pre-heated metal bath (30 °C) for 12 hours. After the reaction was finished, the reaction was analyzed by TLC to monitor product formation. Then a small aliquot of the organic phase was analyzed by GC and GC-MS to monitor product formation. The solvent was evaporated under reduced pressure and the residue was purified by flash column chromatography (petroleum ether/ethoxyethane = 20:1 – 1:1) on  $\text{Al}_2\text{O}_3$  to give the product **L1-L11** in the reported yields.

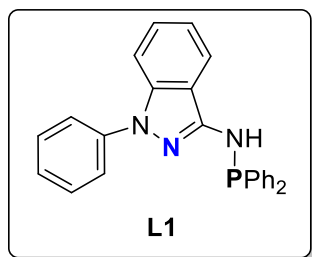

***N*-(diphenylphosphanyl)-1-phenyl-1H-indazol-3-amine (L1)**

The title compound was prepared according to the general procedure and purified by column chromatography to give a white solid 349.9 mg, 89% yield.

<sup>1</sup>H NMR (400 MHz, CDCl<sub>3</sub>) δ 8.05 (d, *J* = 8.1 Hz, 1H), 7.62 (dd, *J* = 8.2, 2.5 Hz, 3H), 7.52 (td, *J* = 7.6, 1.8 Hz, 4H), 7.40 (t, *J* = 7.9 Hz, 2H), 7.34 – 7.31 (m, 7H), 7.17 (t, *J* = 7.5 Hz, 1H), 7.06 (t, *J* = 7.5 Hz, 1H), 5.20 (d, *J* = 7.2 Hz, 1H) ppm.

<sup>13</sup>C NMR (101 MHz, CDCl<sub>3</sub>) δ 148.98, 148.79, 140.35, 140.33, 140.23, 140.07, 131.27, 131.06, 129.14, 129.10, 128.49, 128.43, 127.61, 125.08, 121.72, 121.64, 121.60, 119.83, 116.69, 116.67, 110.13 ppm.

<sup>31</sup>P NMR (162 MHz, CDCl<sub>3</sub>) δ 32.45 ppm.

HRMS (ESI) calcd. for C<sub>25</sub>H<sub>21</sub>N<sub>3</sub>P [M+H]: 394.1473, found: 394.1474.

Elemental Analysis calcd for C<sub>25</sub>H<sub>20</sub>N<sub>3</sub>P: C, 76.32; H, 5.12; N, 10.68; found: C, 76.34; H, 5.16; N, 10.63.

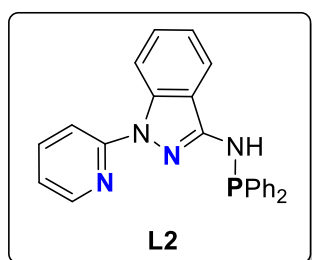

***N*-(diphenylphosphanyl)-1-(pyridin-2-yl)-1H-indazol-3-amine (L2)**

The title compound was prepared according to the general procedure and purified by column chromatography to give a white solid 323.2 mg, 82% yield.

<sup>1</sup>H NMR (400 MHz, CDCl<sub>3</sub>) δ 8.82 (d, *J* = 8.6 Hz, 1H), 8.44 (dd, *J* = 4.9, 1.2 Hz, 1H), 7.98 (d, *J* = 8.1 Hz, 1H), 7.81 (d, *J* = 8.4 Hz, 1H), 7.72 – 7.67 (m, 1H), 7.59 – 7.55 (m, 4H), 7.52 – 7.48 (m, 1H), 7.43 – 7.40 (m, 6H), 7.20 (t, *J* = 7.5 Hz, 1H), 7.01

– 6.98 (m, 1H), 5.14 (d,  $J = 6.4$  Hz, 1H) ppm.

$^{13}\text{C}$  NMR (101 MHz,  $\text{CDCl}_3$ )  $\delta$  154.42, 149.82, 149.66, 147.58, 140.42, 140.22, 140.10, 138.00, 131.60, 131.39, 129.45, 128.77, 128.71, 128.64, 121.32, 120.65, 120.55, 118.36, 118.10, 118.09, 115.56, 112.71 ppm.

$^{31}\text{P}$  NMR (162 MHz,  $\text{CDCl}_3$ )  $\delta$  32.08 ppm.

HRMS (ESI) calcd. for  $\text{C}_{24}\text{H}_{20}\text{N}_4\text{P}$  [ $\text{M}+\text{H}$ ]: 395.1425, found: 395.1422.

Elemental Analysis calcd for  $\text{C}_{24}\text{H}_{19}\text{N}_4\text{P}$ : C, 73.09; H, 4.86; N, 14.2; found: C, 73.04; H, 4.88; N, 14.19.

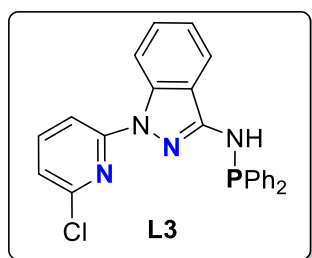

### 1-(6-chloropyridin-2-yl)-N-(diphenylphosphanyl)-1H-indazol-3-amine (L3)

The title compound was prepared according to the general procedure and purified by column chromatography to give a white solid 325.4 mg, 76% yield.

$^1\text{H}$  NMR (400 MHz,  $\text{CDCl}_3$ )  $\delta$  8.77 (d,  $J = 8.6$  Hz, 1H), 7.94 (d,  $J = 8.0$  Hz, 1H), 7.70 (d,  $J = 8.1$  Hz, 1H), 7.61 (t,  $J = 7.9$  Hz, 1H), 7.57 – 7.51 (m, 5H), 7.43 – 7.40 (m, 6H), 7.22 (t,  $J = 7.5$  Hz, 1H), 6.98 (d,  $J = 7.6$  Hz, 1H), 5.13 (d,  $J = 6.2$  Hz, 1H) ppm.

$^{13}\text{C}$  NMR (101 MHz,  $\text{CDCl}_3$ )  $\delta$  153.58, 150.29, 150.13, 148.76, 140.21, 140.09, 139.82, 139.70, 131.45, 131.24, 129.38, 128.93, 128.65, 128.59, 121.74, 120.39, 120.30, 118.34, 117.56, 115.68, 110.31 ppm.

$^{31}\text{P}$  NMR (162 MHz,  $\text{CDCl}_3$ )  $\delta$  32.1 ppm.

HRMS (ESI) calcd. for  $\text{C}_{24}\text{H}_{19}\text{ClN}_4\text{P}$  [ $\text{M}+\text{H}$ ]: 429.1036, found: 429.1031.

Elemental Analysis calcd for  $\text{C}_{24}\text{H}_{18}\text{ClN}_4\text{P}$ : C, 67.22; H, 4.23; N, 13.06; found: C, 67.28; H, 4.28; N, 13.07.

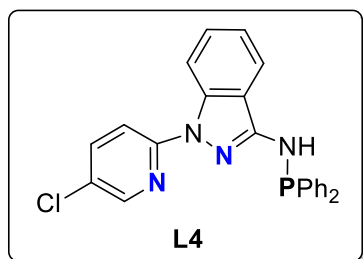

### 1-(5-chloropyridin-2-yl)-*N*-(diphenylphosphanyl)-1H-indazol-3-amine (L4)

The title compound was prepared according to the general procedure and purified by column chromatography to give a white solid 346.8 mg, 81% yield.

<sup>1</sup>H NMR (400 MHz, CDCl<sub>3</sub>) δ 8.69 (d, *J* = 8.6 Hz, 1H), 8.32 (d, *J* = 2.3 Hz, 1H), 7.92 (d, *J* = 8.1 Hz, 1H), 7.72 (d, *J* = 8.9 Hz, 1H), 7.57 (dd, *J* = 8.9, 2.5 Hz, 1H), 7.55 – 7.49 (m, 4H), 7.47 – 7.44 (m, 1H), 7.39 – 7.35 (m, 6H), 7.16 (t, *J* = 7.5 Hz, 1H), 5.15 (d, *J* = 6.2 Hz, 1H) ppm.

<sup>13</sup>C NMR (101 MHz, CDCl<sub>3</sub>) δ 152.50, 150.09, 149.93, 145.89, 140.20, 139.95, 139.83, 137.65, 131.52, 131.31, 129.42, 128.76, 128.71, 128.65, 125.38, 121.55, 120.57, 120.48, 118.26, 118.25, 115.47, 113.46 ppm.

<sup>31</sup>P NMR (162 MHz, CDCl<sub>3</sub>) δ 32.26 ppm.

HRMS (ESI) calcd. for C<sub>24</sub>H<sub>19</sub>ClN<sub>4</sub>P [M+H]: 429.1036, found: 429.1032.

Elemental Analysis calcd for C<sub>24</sub>H<sub>18</sub>ClN<sub>4</sub>P: C, 67.22; H, 4.23; N, 13.06; found: C, 67.26; H, 4.27; N, 13.08.

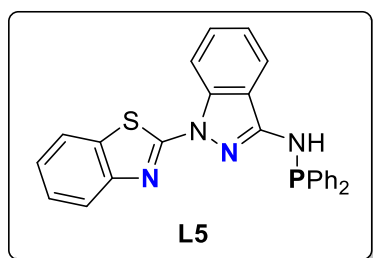

### 1-(benzo[d]thiazol-2-yl)-*N*-(diphenylphosphanyl)-1H-indazol-3-amine (L5)

The title compound was prepared according to the general procedure and purified by column chromatography to give a white solid 387.1 mg, 86% yield.

<sup>1</sup>H NMR (400 MHz, CDCl<sub>3</sub>) δ 8.72 (d, *J* = 8.5 Hz, 1H), 8.09 (d, *J* = 8.1 Hz, 1H), 7.85 (d, *J* = 8.1 Hz, 1H), 7.73 (d, *J* = 7.9 Hz, 1H), 7.58 – 7.51 (m, 5H), 7.41 – 7.36 (m,

7H), 7.24 – 7.20 (m, 2H), 5.35 (d,  $J = 5.3$  Hz, 1H) ppm.

$^{13}\text{C}$  NMR (101 MHz,  $\text{CDCl}_3$ )  $\delta$  160.81, 152.26, 151.35, 151.17, 140.13, 139.39, 139.27, 132.02, 131.50, 131.29, 129.56, 129.48, 128.66, 128.59, 126.01, 123.28, 122.69, 121.69, 121.55, 121.34, 121.07, 118.74, 114.58 ppm.

$^{31}\text{P}$  NMR (162 MHz,  $\text{CDCl}_3$ )  $\delta$  33.08 ppm.

HRMS (ESI) calcd. for  $\text{C}_{26}\text{H}_{20}\text{N}_4\text{PS}$  [ $\text{M}+\text{H}$ ]: 451.1146, found: 451.1143.

Elemental Analysis calcd for  $\text{C}_{26}\text{H}_{19}\text{N}_4\text{PS}$ : C, 69.32; H, 4.25; N, 12.44; found: C, 69.37; H, 4.27; N, 12.47.

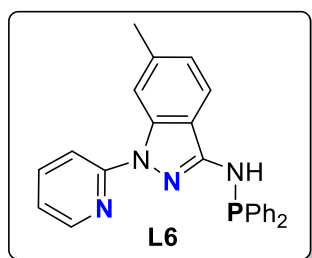

#### ***N*-(diphenylphosphanyl)-6-methyl-1-(pyridin-2-yl)-1H-indazol-3-amine (L6)**

The title compound was prepared according to the general procedure and purified by column chromatography to give a white solid 355.1 mg, 87% yield.

$^1\text{H}$  NMR (400 MHz,  $\text{CDCl}_3$ )  $\delta$  8.61 (s, 1H), 8.37 (d,  $J = 3.9$  Hz, 1H), 7.78 (dd,  $J = 27.5, 8.3$  Hz, 2H), 7.51 – 7.48 (m, 5H), 7.30 – 7.28 (m, 6H), 6.94 (d,  $J = 8.2$  Hz, 1H), 6.86 (dd,  $J = 6.6, 5.3$  Hz, 1H), 5.24 (d,  $J = 6.5$  Hz, 1H), 2.46 (s, 3H) ppm.

$^{13}\text{C}$  NMR (101 MHz,  $\text{CDCl}_3$ )  $\delta$  153.24, 148.62, 148.45, 146.25, 139.76, 139.03, 138.91, 137.86, 136.68, 130.34, 130.13, 128.13, 127.48, 127.42, 122.06, 119.15, 119.04, 116.91, 115.06, 115.05, 113.92, 111.50, 21.09 ppm.

$^{31}\text{P}$  NMR (162 MHz,  $\text{CDCl}_3$ )  $\delta$  32.13 ppm.

HRMS (ESI) calcd. for  $\text{C}_{25}\text{H}_{22}\text{N}_4\text{P}$  [ $\text{M}+\text{H}$ ]: 409.1582, found: 409.1586.

Elemental Analysis calcd for  $\text{C}_{25}\text{H}_{21}\text{N}_4\text{P}$ : C, 73.52; H, 5.18; N, 13.72; found: C, 73.53; H, 5.13; N, 13.78.



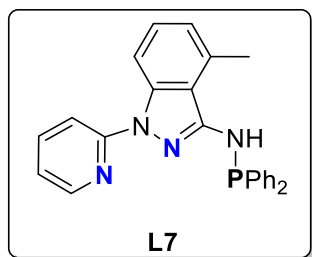

***N*-(diphenylphosphanyl)-4-methyl-1-(pyridin-2-yl)-1H-indazol-3-amine (L7)**

The title compound was prepared according to the general procedure and purified by column chromatography to give a white solid 338.8 mg, 83% yield.

<sup>1</sup>H NMR (400 MHz, CDCl<sub>3</sub>) δ 8.70 (d, *J* = 8.6 Hz, 1H), 8.42 (dd, *J* = 4.9, 1.0 Hz, 1H), 7.82 (d, *J* = 8.4 Hz, 1H), 7.67 – 7.60 (m, 5H), 7.45 – 7.40 (m, 6H), 7.35 (dd, *J* = 8.3, 7.3 Hz, 1H), 6.99 – 6.90 (m, 1H), 6.91 (d, *J* = 7.1 Hz, 1H), 5.05 (d, *J* = 4.9 Hz, 1H), 2.70 (s, 3H) ppm.

<sup>13</sup>C NMR (101 MHz, CDCl<sub>3</sub>) δ 154.32, 150.05, 149.95, 147.18, 140.34, 140.32, 140.18, 140.03, 137.70, 131.43, 131.22, 130.40, 129.13, 128.53, 128.47, 122.71, 118.09, 117.54, 117.53, 113.40, 112.91, 19.44 ppm.

<sup>31</sup>P NMR (162 MHz, CDCl<sub>3</sub>) δ 32.67 ppm.

HRMS (ESI) calcd. for C<sub>25</sub>H<sub>22</sub>N<sub>4</sub>P [M+H]: 409.1582, found: 409.1584.

Elemental Analysis calcd for C<sub>25</sub>H<sub>21</sub>N<sub>4</sub>P: C, 73.52; H, 5.18; N, 13.72; found: C, 73.58; H, 5.14; N, 13.76.

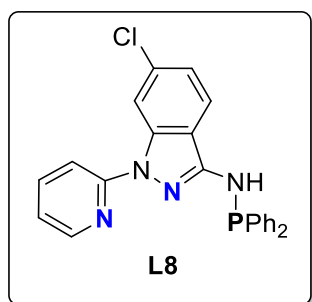

**6-chloro-*N*-(diphenylphosphanyl)-1-(pyridin-2-yl)-1H-indazol-3-amine (L8)**

The title compound was prepared according to the general procedure and purified by column chromatography to give a white solid 338.2 mg, 79% yield.

<sup>1</sup>H NMR (400 MHz, CDCl<sub>3</sub>) δ 8.86 (s, 1H), 8.44 – 8.38 (m, 1H), 7.90 (d, *J* = 8.5 Hz,

1H), 7.75 (d,  $J = 8.4$  Hz, 1H), 7.67 (d,  $J = 7.4$  Hz, 1H), 7.52 – 7.36 (m, 11H), 7.12 (d,  $J = 8.5$  Hz, 1H), 6.99 – 6.96 (m, 1H), 5.19 (d,  $J = 6.0$  Hz, 1H) ppm.

$^{13}\text{C}$  NMR (101 MHz,  $\text{CDCl}_3$ )  $\delta$  153.85, 149.51, 149.34, 147.44, 140.43, 139.80, 139.68, 137.95, 134.72, 131.39, 131.19, 129.38, 128.65, 128.58, 121.94, 121.60, 121.49, 118.59, 115.26, 112.42 ppm.

$^{31}\text{P}$  NMR (162 MHz,  $\text{CDCl}_3$ )  $\delta$  32.64 ppm.

HRMS (ESI) calcd. for  $\text{C}_{24}\text{H}_{19}\text{ClN}_4\text{P}$  [M+H]: 429.1036, found: 429.1039.

Elemental Analysis calcd for  $\text{C}_{24}\text{H}_{18}\text{ClN}_4\text{P}$ : C, 67.22; H, 4.23; N, 13.06; found: C, 67.25; H, 4.27; N, 13.08.

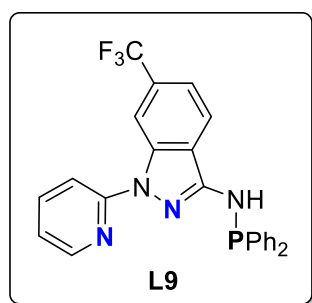

***N*-(diphenylphosphanyl)-1-(pyridin-2-yl)-6-(trifluoromethyl)-1H-indazol-3-amine (L9)**

The title compound was prepared according to the general procedure and purified by column chromatography to give a white solid 342 mg, 74% yield.

$^1\text{H}$  NMR (400 MHz,  $\text{CDCl}_3$ )  $\delta$  9.20 (s, 1H), 8.48 – 8.46 (m, 1H), 8.13 (d,  $J = 8.5$  Hz, 1H), 7.82 (d,  $J = 8.4$  Hz, 1H), 7.73 – 7.69 (m, 1H), 7.59 – 7.55 (m, 4H), 7.42 – 7.40 (M, 7H), 7.04 (ddd,  $J = 7.1, 4.9, 0.9$  Hz, 1H), 5.26 (d,  $J = 6.3$  Hz, 1H) ppm.

$^{13}\text{C}$  NMR (101 MHz,  $\text{CDCl}_3$ )  $\delta$  153.80, 149.43, 149.26, 147.55, 139.66, 139.54, 139.23, 138.05, 131.41, 131.20, 130.40, 130.09, 129.45, 128.68, 128.62, 125.84, 123.13, 121.54, 121.43, 119.58, 118.89, 117.55, 113.33, 113.29, 112.52 ppm.

$^{31}\text{P}$  NMR (162 MHz,  $\text{CDCl}_3$ )  $\delta$  32.97 ppm.

$^{19}\text{F}$  NMR (376 MHz,  $\text{CDCl}_3$ )  $\delta$  -61.48 ppm.

HRMS (ESI) calcd. for  $\text{C}_{25}\text{H}_{19}\text{F}_3\text{N}_4\text{P}$  [M+H]: 463.1299, found: 463.1296.

Elemental Analysis calcd for  $\text{C}_{25}\text{H}_{18}\text{F}_3\text{N}_4\text{P}$ : C, 64.94; H, 3.92; N, 12.12; found: C, 64.97; H, 3.95; N, 12.17.

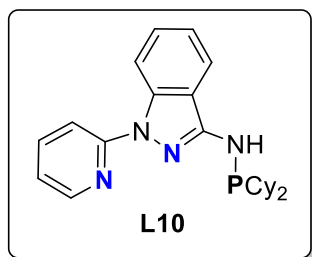

***N*-(dicyclohexylphosphanyl)-1-(pyridin-2-yl)-1H-indazol-3-amine (L10)**

The title compound was prepared according to the general procedure and purified by column chromatography to give a white solid 325.1 mg, 80% yield.

<sup>1</sup>H NMR (400 MHz, CDCl<sub>3</sub>) δ 8.78 (d, *J* = 8.5 Hz, 1H), 8.43 – 8.42 (m, 1H), 8.17 (d, *J* = 7.7 Hz, 1H), 7.82 (d, *J* = 8.3 Hz, 1H), 7.73 – 7.69 (m, 1H), 7.46 (t, *J* = 7.8 Hz, 1H), 7.17 (t, *J* = 7.5 Hz, 1H), 6.99 – 6.96 (m, 1H), 4.60 (d, *J* = 4.9 Hz, 1H), 1.87 – 1.67 (m, 12H), 1.32 – 1.19 (m, 10H) ppm.

<sup>13</sup>C NMR (101 MHz, CDCl<sub>3</sub>) δ 154.33, 147.52, 140.45, 137.81, 128.28, 121.92, 121.78, 120.74, 117.98, 115.16, 112.41, 36.68, 36.56, 29.08, 28.90, 27.19, 27.12, 26.83, 26.75 ppm.

<sup>31</sup>P NMR (162 MHz, CDCl<sub>3</sub>) δ 48.74 ppm.

HRMS (ESI) calcd. for C<sub>24</sub>H<sub>32</sub>N<sub>4</sub>P [M+H]: 407.2364, found: 407.2369.

Elemental Analysis calcd for C<sub>24</sub>H<sub>31</sub>N<sub>4</sub>P: C, 70.91; H, 7.69; N, 13.78; found: C, 70.95; H, 7.67; N, 13.74.

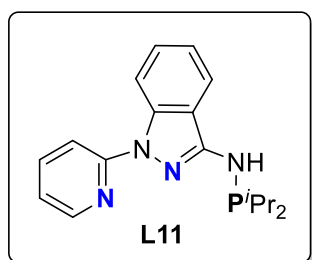

***N*-(diisopropylphosphanyl)-1-(pyridin-2-yl)-1H-indazol-3-amine (L11)**

The title compound was prepared according to the general procedure and purified by column chromatography to give a white solid 264.2 mg, 81% yield.

<sup>1</sup>H NMR (400 MHz, CDCl<sub>3</sub>) δ 8.83 (d, *J* = 8.6 Hz, 1H), 8.46 – 8.44 (m, 1H), 8.15 (d, *J* = 8.1 Hz, 1H), 7.86 (d, *J* = 8.4 Hz, 1H), 7.71 (ddd, *J* = 8.5, 7.3, 1.9 Hz, 1H), 7.49

(ddd,  $J = 8.3, 7.1, 1.0$  Hz, 1H), 7.21 – 7.18 (m, 1H), 6.97 (ddd,  $J = 7.2, 4.9, 0.9$  Hz, 1H), 4.62 (d,  $J = 5.7$  Hz, 1H), 2.00 – 1.90 (m, 2H), 1.19 – 1.13 (m, 12H) ppm.

$^{13}\text{C}$  NMR (101 MHz,  $\text{CDCl}_3$ )  $\delta$  154.21, 151.32, 151.18, 147.37, 140.27, 137.67, 128.17, 121.48, 121.35, 120.70, 117.91, 117.86, 115.13, 112.27, 26.79, 26.66, 18.83, 18.63, 17.25, 17.17 ppm.

$^{31}\text{P}$  NMR (162 MHz,  $\text{CDCl}_3$ )  $\delta$  55.61 ppm.

**HRMS** (ESI) calcd. for  $\text{C}_{18}\text{H}_{24}\text{N}_4\text{P}$  [ $\text{M}+\text{H}$ ]: 327.1738, found: 327.1734.

**Elemental Analysis** calcd for  $\text{C}_{18}\text{H}_{23}\text{N}_4\text{P}$ : C, 66.24; H, 7.10; N, 17.17; found: C, 66.26; H, 7.13; N, 17.15.

### 3. Screening of reaction parameters

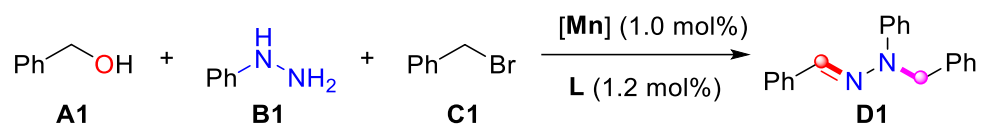

Using a nitrogen-filled glove box, an oven-dried pressure tube (38 mL volume) was charged with a magnetic stirring bar, catalyst, ligand, solvent, phenyl methanol (**A1**), phenyl hydrazine (**B1**) and (bromomethyl)benzene (**C1**). Then the seal tube was closed tightly with a teflon cap, removed from the glove box and immersed into a pre-heated metal bath (design temperature) for design time. After the reaction was finished, the reaction was analyzed by TLC to monitor product formation. Then a small aliquot of the organic phase was analyzed by GC and GC-MS to monitor product formation. The solvent was evaporated under reduced pressure and the residue was purified by flash column chromatography (petroleum ether/dichloromethane = 20:1 – 5:1) on silica gel to give the product **D1** in the reported yields.

---

| Entry            | Parameter                                     |
|------------------|-----------------------------------------------|
| <b>Table S1</b>  | <b>The difference of ligand screening</b>     |
| <b>Table S2</b>  | <b>The difference of catalyst screening</b>   |
| <b>Table S3</b>  | <b>The difference of base screening</b>       |
| <b>Table S4</b>  | <b>The difference of solvent screening</b>    |
| <b>Table S5</b>  | <b>The ratio of substrates screening</b>      |
| <b>Table S6</b>  | <b>Screening the loading of <i>t</i>-BuOK</b> |
| <b>Table S7</b>  | <b>The loading of solvent screening</b>       |
| <b>Table S8</b>  | <b>The Pd-catalyst loading screening</b>      |
| <b>Table S9</b>  | <b>Reaction temperature screening</b>         |
| <b>Table S10</b> | <b>Reaction time screening</b>                |
| <b>Table S11</b> | <b>The reaction system screening</b>          |

---

**Table S1. The difference of ligand screening** <sup>[a]</sup>

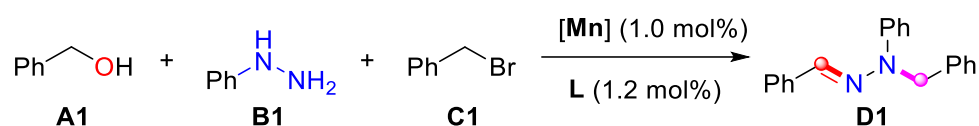

| Entry     | Ligand     | D1 (%)    | D1:E1           |
|-----------|------------|-----------|-----------------|
| 1         | L1         | <5        | 8:1             |
| 2         | L2         | 62        | >20:1           |
| 3         | L3         | 41        | >20:1           |
| 4         | L4         | 54        | 18:1            |
| 5         | L5         | 22        | 19:1            |
| 6         | L6         | 60        | 18:1            |
| 7         | L7         | 63        | 18:1            |
| 8         | L8         | 51        | 17:1            |
| 9         | L9         | 47        | 18:1            |
| 10        | L10        | 82        | 19:1            |
| <b>11</b> | <b>L11</b> | <b>91</b> | <b>&gt;20:1</b> |
| 12        | -          | 0         | -               |

[a] Reaction condition: **A1** (0.8 mmol), **B1** (0.5 mmol), **C1** (0.7 mmol), MnBr(CO)<sub>5</sub> (1.0 mol%), **L1-L11** (1.2 mol%), <sup>t</sup>BuOK (1.0 mmol), THF (3.0 mL), 100 °C, 6 h. Yields of **D1** was determined by GC analysis using *n*-cetane as the internal standard.

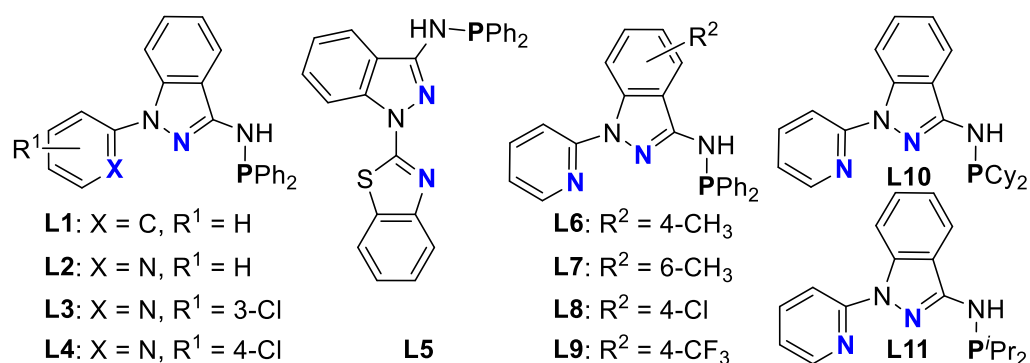

**Table S2. The difference of catalyst screening<sup>[a]</sup>**

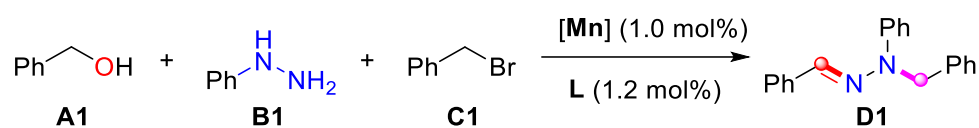

| Entry           | Catalyst                                             | <b>D1</b> (%) |
|-----------------|------------------------------------------------------|---------------|
| 1               | MnBr(CO) <sub>5</sub>                                | 91            |
| 2               | Mn                                                   | 0             |
| 3               | MnO                                                  | 0             |
| 4               | MnO <sub>2</sub>                                     | 0             |
| <b>5</b>        | Mn <sub>3</sub> O <sub>4</sub>                       | 0             |
| 6               | MnS                                                  | 0             |
| 7               | Mn(acac) <sub>3</sub>                                | 0             |
| 8               | Mn(OTf) <sub>2</sub>                                 | 0             |
| 9               | Mn(NO <sub>3</sub> ) <sub>2</sub>                    | 0             |
| 10              | Mn(NO <sub>3</sub> ) <sub>2</sub> •4H <sub>2</sub> O | 0             |
| 11              | MnSO <sub>4</sub> •H <sub>2</sub> O                  | 0             |
| 12 <sup>b</sup> | Mn(OAc) <sub>3</sub> •4H <sub>2</sub> O              | 0             |
| 13 <sup>b</sup> | MnTe <sub>2</sub>                                    | 0             |
| 14              | MnCO <sub>3</sub>                                    | 0             |
| 15              | MnF <sub>2</sub>                                     | 0             |
| 16              | MnF <sub>3</sub>                                     | 0             |
| 17              | MnCl <sub>2</sub>                                    | 0             |
| 18              | MnCl <sub>2</sub> •4H <sub>2</sub> O                 | 0             |
| 19              | MnBr <sub>2</sub>                                    | 0             |
| 20              | MnBr <sub>2</sub> •4H <sub>2</sub> O                 | 0             |
| 21              | -                                                    | 0             |

[a] Reaction condition: **A1** (0.8 mmol), **B1** (0.5 mmol), **C1** (0.7 mmol), Catalyst (1.0 mol%), **L11** (1.2 mol%), <sup>t</sup>BuOK (1.0 mmol), THF (3.0 mL), 100 °C, 6 h. Yields of **D1** was determined by GC analysis using *n*-cetane as the internal standard.



**Table S3. The difference of base screening<sup>[a]</sup>**

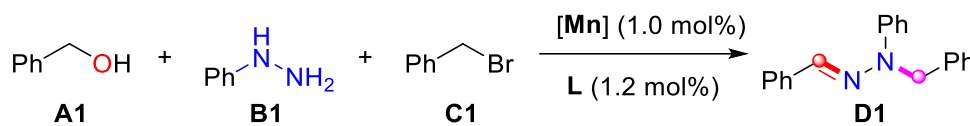

| Entry     | Base (5 mol%)                   | <b>D1</b> (%) |
|-----------|---------------------------------|---------------|
| 1         | LiOH                            | 0             |
| 2         | <i>t</i> -BuOLi                 | 11            |
| 3         | LiHMDS                          | 9             |
| 4         | Na <sub>2</sub> CO <sub>3</sub> | 0             |
| 5         | NaOH                            | <5            |
| 6         | <i>t</i> -BuONa                 | 63            |
| 7         | NaHMDS                          | 64            |
| 8         | NaH                             | 41            |
| 9         | K <sub>2</sub> CO <sub>3</sub>  | 0             |
| 10        | K <sub>3</sub> PO <sub>4</sub>  | 0             |
| 11        | KOH                             | <5            |
| <b>12</b> | <b><i>t</i>-BuOK</b>            | <b>91</b>     |
| 13        | KHMDS                           | 82            |
| 14        | KH                              | 43            |
| 15        | Cs <sub>2</sub> CO <sub>3</sub> | 0             |
| 16        | CsOH                            | <5            |
| 17        | <i>t</i> -BuOCs                 | 26            |
| 18        | Et <sub>3</sub> N               | 0             |
| 19        | Pyridine                        | 0             |
| 20        | DBU                             | 0             |
| 21        | TMEDA                           | 0             |

[a] Reaction condition: **A1** (0.8 mmol), **B1** (0.5 mmol), **C1** (0.7 mmol), MnBr(CO)<sub>5</sub> (1.0 mol%), **L11** (1.2 mol%), Base (1.0 mmol), THF (3.0 mL), 100 °C, 6 h. Yields of **D1** was determined by GC analysis using *n*-cetane as the internal standard.

**Table S4. The difference of solvent screening<sup>[a]</sup>**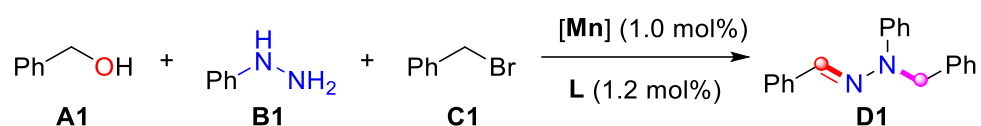

| Entry    | Solvent (3 mL)     | D1 (%)    |
|----------|--------------------|-----------|
| 1        | anisole            | 72        |
| <b>2</b> | <b>THF</b>         | <b>91</b> |
| 3        | 1,4-dioxane        | 80        |
| 4        | DME                | 12        |
| 5        | toluene            | 67        |
| 6        | xylene             | 61        |
| 7        | mesitylene         | 52        |
| 8        | DCM                | <5        |
| 9        | CH <sub>3</sub> CN | <5        |
| 10       | pyridine           | 13        |
| 11       | methanol           | <5        |
| 12       | ethanol            | <5        |
| 13       | isopropanol        | <5        |
| 14       | <i>t</i> -AmOH     | 26        |
| 15       | DMF                | <5        |
| 16       | DMAc               | <5        |
| 17       | NMP                | <5        |
| 18       | DMSO               | <5        |

[a] Reaction condition: **A1** (0.8 mmol), **B1** (0.5 mmol), **C1** (0.7 mmol), MnBr(CO)<sub>5</sub> (1.0 mol%), **L11** (1.2 mol%), <sup>t</sup>BuOK (1.0 mmol), solvent (3.0 mL), 100 °C, 6 h. Yields of **D1** was determined by GC analysis using *n*-cetane as the internal standard.

**Table S5. The ratio of substrates screening<sup>[a]</sup>**

$\text{Ph-CH}_2\text{-OH}$  (A1) +  $\text{Ph-NH-NH}_2$  (B1) +  $\text{Ph-CH}_2\text{-Br}$  (C1)  $\xrightarrow[\text{L (1.2 mol\%)}]{\text{[Mn] (1.0 mol\%)}}$   $\text{Ph-CH=N-N(Ph)-CH}_2\text{-Ph}$  (D1)

| Entry    | A1(mmol)   | B1(mmol)   | C1(mmol)   | D1 (%)    |
|----------|------------|------------|------------|-----------|
| 1        | 0.5        | 0.5        | 0          | 0         |
| 2        | 0.5        | 0.5        | 0.5        | 51        |
| 3        | 0.5        | 0.5        | 0.6        | 60        |
| 4        | 0.5        | 0.5        | 0.7        | 63        |
| 5        | 0.5        | 0.5        | 0.8        | 63        |
| 6        | 0          | 0.5        | 0.7        | 0         |
| 7        | 0.6        | 0.5        | 0.7        | 77        |
| 8        | 0.7        | 0.5        | 0.7        | 86        |
| <b>9</b> | <b>0.8</b> | <b>0.5</b> | <b>0.7</b> | <b>91</b> |
| 10       | 0.9        | 0.5        | 0.7        | 91        |
| 11       | 0.8        | 0.4        | 0.7        | 87        |
| 12       | 0.8        | 0.6        | 0.7        | 90        |
| 13       | 0.8        | 0.7        | 0.7        | 90        |

[a] Reaction condition: **A1** (x mmol), **B1** (x mmol), **C1** (x mmol), MnBr(CO)<sub>5</sub> (1.0 mol%), **L11** (1.2 mol%), <sup>t</sup>BuOK (1.0 mmol), THF (3.0 mL), 100 °C, 6 h. Yields of **D1** was determined by GC analysis using *n*-cetane as the internal standard.

**Table S6. Screening the loading of *t*-BuOK<sup>[a]</sup>**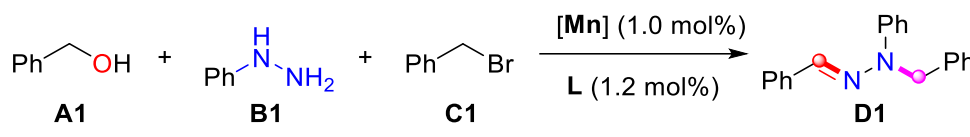

| Entry    | <i>t</i> -BuOK (mmol) | <b>D1</b> (%) |
|----------|-----------------------|---------------|
| 1        | 0                     | 0             |
| 2        | 0.25                  | 0             |
| 3        | 0.5                   | <5            |
| 4        | 0.75                  | 86            |
| <b>5</b> | <b>1.0</b>            | <b>91</b>     |
| 6        | 1.25                  | 91            |
| 7        | 2.0                   | 90            |

[a] Reaction condition: **A1** (0.8 mmol), **B1** (0.5 mmol), **C1** (0.7 mmol), MnBr(CO)<sub>5</sub> (1.0 mol%), **L11** (1.2 mol%), *t*BuOK (X mmol), THF (3.0 mL), 100 °C, 6 h. Yields of **D1** was determined by GC analysis using *n*-cetane as the internal standard.

**Table S7. The loading of solvent screening<sup>[a]</sup>**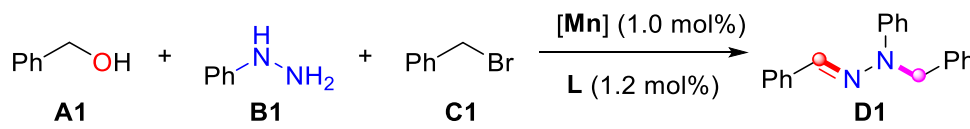

| Entry    | THF (mL)   | <b>D1</b> (%) |
|----------|------------|---------------|
| 1        | 0          | 23            |
| 2        | 0.5        | 61            |
| 3        | 1.0        | 76            |
| 4        | 1.5        | 80            |
| 5        | 2.0        | 88            |
| <b>6</b> | <b>3.0</b> | <b>91</b>     |
| 7        | 4.0        | 90            |

[a] Reaction condition: **A1** (0.8 mmol), **B1** (0.5 mmol), **C1** (0.7 mmol), MnBr(CO)<sub>5</sub> (1.0 mol%), **L11** (1.2 mol%), *t*BuOK (1.0 mmol), THF (x mL), 100 °C, 6 h. Yields of **D1** was determined by GC analysis using *n*-cetane as the internal standard.

**Table S8. The Pd-catalyst loading screening<sup>[a]</sup>**

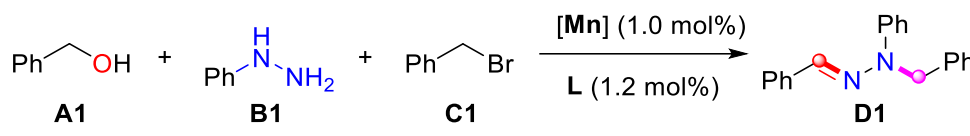

| Entry | MnBr(CO) <sub>5</sub> | L11          | D1 (%)    |
|-------|-----------------------|--------------|-----------|
| 1     | 0                     |              | 0         |
| 2     | 0.0005                | 0.0006       | 13        |
| 3     | 0.001                 | 0.0012       | 42        |
| 4     | 0.005                 | 0.006        | 76        |
| 5     | <b>0.01</b>           | <b>0.012</b> | <b>91</b> |
| 6     | 0.02                  | 0.024        | 91        |

[a] Reaction condition: **A1** (0.8 mmol), **B1** (0.5 mmol), **C1** (0.7 mmol), MnBr(CO)<sub>5</sub> (x mol%), **L11** (x mol%), <sup>t</sup>BuOK (1.0 mmol), solvent (3.0 mL), 100 °C, 6 h. Yields of **D1** was determined by GC analysis using *n*-cetane as the internal standard.

**Table S9. Reaction temperature screening<sup>[a]</sup>**

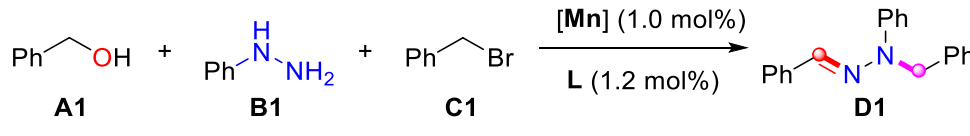

| Entry | T (° C)    | D1 (%)    |
|-------|------------|-----------|
| 1     | RT         | 0         |
| 2     | 80         | 61        |
| 3     | 90         | 80        |
| 4     | <b>100</b> | <b>91</b> |
| 5     | 110        | 89        |
| 6     | 120        | 82        |

[a] Reaction condition: **A1** (0.8 mmol), **B1** (0.5 mmol), **C1** (0.7 mmol), MnBr(CO)<sub>5</sub> (1.0 mol%), **L11** (1.2 mol%), <sup>t</sup>BuOK (1.0 mmol), THF (3.0 mL), x °C, 6 h. Yields of **D1** was determined by GC analysis using *n*-cetane as the internal standard.

**Table S10. Reaction time screening<sup>[a]</sup>**

| Entry | t (h) | D1 (%) |
|-------|-------|--------|
| 1     | 3     | 65     |
| 2     | 6     | 91     |
| 3     | 10    | 93     |
| 4     | 12    | 96     |
| 5     | 14    | 96     |

[a] Reaction condition: **A1** (0.8 mmol), **B1** (0.5 mmol), **C1** (0.7 mmol), MnBr(CO)<sub>5</sub> (1.0 mol%), **L11** (1.2 mol%), <sup>t</sup>BuOK (1.0 mmol), THF (3.0 mL), 100 °C, x h. Yields of **D1** was determined by GC analysis using *n*-cetane as the internal standard.

**Table S11. The reaction system screening<sup>[a]</sup>**

| Entry | System | atmosphere     | D1 (%) |
|-------|--------|----------------|--------|
| 1     | open   | N <sub>2</sub> | 93     |
| 2     | open   | O <sub>2</sub> | <5     |
| 3     | open   | air            | 36     |
| 4     | seal   | N <sub>2</sub> | 96     |
| 5     | seal   | O <sub>2</sub> | <5     |
| 6     | seal   | air            | 46     |

[a] Reaction condition: **A1** (0.8 mmol), **B1** (0.5 mmol), **C1** (0.7 mmol), MnBr(CO)<sub>5</sub> (1.0 mol%), **L11** (1.2 mol%), <sup>t</sup>BuOK (1.0 mmol), THF (3.0 mL), 100 °C, 12 h. Yields of **D1** was determined by GC analysis using *n*-cetane as the internal standard.

#### 4. General Procedure for the products

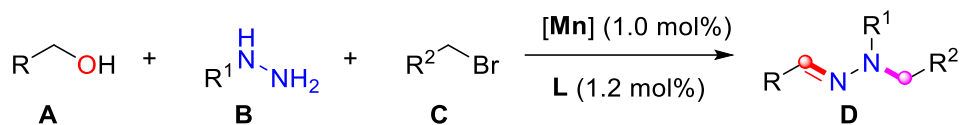

Using a nitrogen-filled glove box, an oven-dried pressure tube (38 mL volume) was charged with a magnetic stirring bar,  $\text{MnBr}(\text{CO})_5$  (1.0 mol%), **L11** (1.2 mol%),  $t\text{BuOK}$  (1.0 mmol), alcohols (**A**, 0.8 mmol), hydrazines (**B**, 0.5 mmol) and alkyl halides (**C**, 0.7 mmol) and THF (3 mL). Then the seal tube was closed tightly with a teflon cap, removed from the glove box and immersed into a pre-heated metal bath (100 °C) for 12 hours. After the reaction was finished, the reaction was analyzed by TLC to monitor product formation. Then a small aliquot of the organic phase was analyzed by GC and GC-MS to monitor product formation. The solvent was evaporated under reduced pressure and the residue was purified by flash column chromatography (petroleum ether/dichloromethane = 20:1 – 5:1) on silica gel to give the products **D** in the reported yields.

## 5. Characterization Data <sup>[2]</sup>

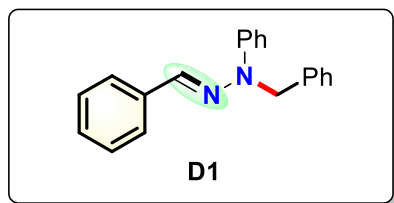

### 1-benzyl-2-benzylidene-1-phenylhydrazine (D1)

The title compound was prepared according to the general procedure and purified by column chromatography to give a yellow solid 131.7 mg, 92% yield. Purification by column chromatography on silica gel (pentane/ethyl ether = 20 : 1 – 5:1).

<sup>1</sup>H NMR (400 MHz, 23.0 °C, CDCl<sub>3</sub>) δ 7.64 – 7.55 (m, 2H), 7.42 – 7.36 (m, 2H), 7.35 – 7.24 (m, 7H), 7.20 (q, *J* = 7.3 Hz, 4H), 6.96 – 6.88 (m, 1H), 5.10 (s, 2H) ppm.

<sup>13</sup>C NMR (101 MHz, 23.0 °C, CDCl<sub>3</sub>) δ 147.99, 136.67, 135.78, 132.59, 129.33, 129.17, 128.68, 128.02, 127.45, 126.35, 126.17, 120.90, 114.92, 50.48 ppm.

HRMS (ESI) calcd. for C<sub>20</sub>H<sub>19</sub>N<sub>2</sub> [M+H]: 287.1548, found: 287.1549.

Elemental Analysis calcd for C<sub>20</sub>H<sub>18</sub>N<sub>2</sub>: C, 83.88; H, 6.34; N, 9.78; found: C, 83.86; H, 6.36; N, 9.76.

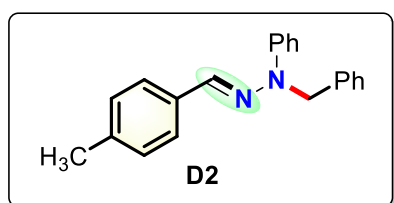

### 1-benzyl-2-(4-methylbenzylidene)-1-phenylhydrazine (D2)

The title compound was prepared according to the general procedure and purified by column chromatography to give a yellow solid 144.2 mg, 96% yield. Purification by column chromatography on silica gel (pentane/ethyl ether = 20 : 1 – 5:1).

<sup>1</sup>H NMR (400 MHz, 23.0 °C, CDCl<sub>3</sub>) δ 7.52 (d, *J* = 8.1 Hz, 2H), 7.44 – 7.31 (m, 6H), 7.28 – 7.20 (m, 4H), 7.14 (d, *J* = 8.0 Hz, 2H), 6.94 (t, *J* = 7.2 Hz, 1H), 5.17 (s, 2H), 2.34 (s, 3H) ppm.

<sup>13</sup>C NMR (101 MHz, 23.0 °C, CDCl<sub>3</sub>) δ 147.90, 137.82, 135.78, 133.77, 132.73,



129.20, 129.11, 128.96, 127.22, 126.12, 126.03, 120.52, 114.66, 50.41, 21.30 ppm.

**HRMS** (ESI) calcd. for  $C_{21}H_{21}N_2$  [M+H]: 301.1705, found: 301.1705.

**Elemental Analysis** calcd for  $C_{21}H_{20}N_2$ : C, 83.96; H, 6.71; N, 9.33; found: C, 83.92; H, 6.72; N, 9.32.

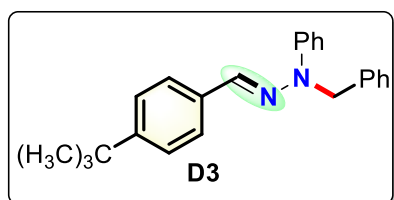

### 1-benzyl-2-(4-(tert-butyl)benzylidene)-1-phenylhydrazine (D3)

The title compound was prepared according to the general procedure and purified by column chromatography to give a yellow solid 164.4 mg, 96% yield. Purification by column chromatography on silica gel (pentane/ethyl ether = 20 : 1 – 5:1).

**$^1H$  NMR** (400 MHz, 23.0 °C,  $CDCl_3$ )  $\delta$  7.57 (d,  $J$  = 8.4 Hz, 2H), 7.46 – 7.26 (m, 10H), 7.23 (d,  $J$  = 7.0 Hz, 2H), 6.94 (t,  $J$  = 7.2 Hz, 1H), 5.18 (s, 2H), 1.31 (s, 9H) ppm.

**$^{13}C$  NMR** (101 MHz, 23.0 °C,  $CDCl_3$ )  $\delta$  151.11, 147.92, 135.72, 133.81, 132.63, 129.13, 128.97, 127.24, 126.07, 125.94, 125.46, 120.56, 114.72, 50.35, 34.66, 31.28 ppm.

**HRMS** (ESI) calcd. for  $C_{24}H_{27}N_2$  [M+H]: 343.2174, found: 343.2176.

**Elemental Analysis** calcd for  $C_{24}H_{26}N_2$ : C, 84.17; H, 7.65; N, 8.18; found: C, 84.12; H, 7.64; N, 8.14.

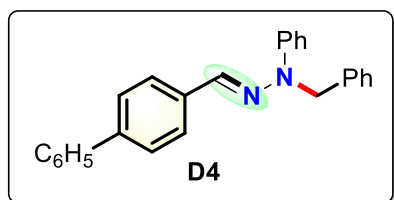

### 2-([1,1'-biphenyl]-4-ylmethylene)-1-benzyl-1-phenylhydrazine (D4)

The title compound was prepared according to the general procedure and purified by column chromatography to give a yellow solid 146.8 mg, 81% yield. Purification by column chromatography on silica gel (pentane/ethyl ether = 20 : 1 – 5:1).

$^1\text{H NMR}$  (400 MHz, 23.0 °C,  $\text{CDCl}_3$ )  $\delta$  7.70 (d,  $J = 8.4$  Hz, 2H), 7.65 – 7.50 (m, 4H), 7.46 – 7.42 (m, 4H), 7.37 – 7.31 (m, 5H), 7.31 – 7.26 (m, 3H), 7.25 (d,  $J = 1.4$  Hz, 1H), 6.97 (t,  $J = 7.2$  Hz, 1H), 5.21 (s, 2H) ppm.

$^{13}\text{C NMR}$  (101 MHz, 23.0 °C,  $\text{CDCl}_3$ )  $\delta$  147.85, 140.77, 135.61, 132.09, 129.18, 129.04, 128.80, 127.89, 127.33, 127.22, 126.94, 126.58, 126.05, 120.83, 114.86, 50.50 ppm.

**HRMS** (ESI) calcd. for  $\text{C}_{26}\text{H}_{23}\text{N}_2$  [ $\text{M}+\text{H}$ ]: 363.1861, found: 363.1860.

**Elemental Analysis** calcd for  $\text{C}_{26}\text{H}_{22}\text{N}_2$ : C, 86.15; H, 6.12; N, 7.73; found: C, 86.16; H, 6.16; N, 7.76.

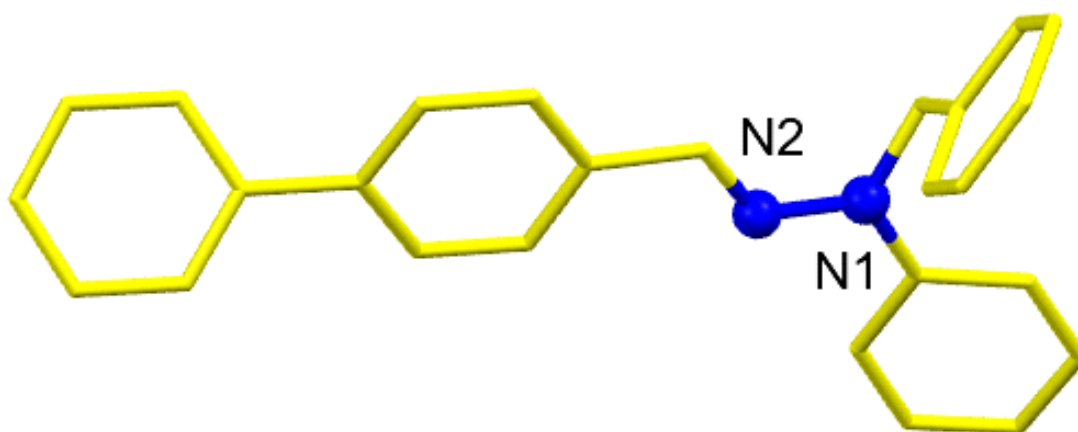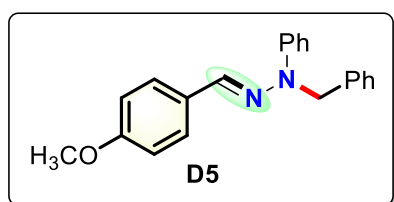

### 1-benzyl-2-(4-methoxybenzylidene)-1-phenylhydrazine (D5)

The title compound was prepared according to the general procedure and purified by column chromatography to give a yellow solid 151.9mg, 96% yield. Purification by column chromatography on silica gel (pentane/ethyl ether = 20 : 1 – 5:1).

$^1\text{H NMR}$  (400 MHz, 23.0 °C,  $\text{CDCl}_3$ )  $\delta$  7.56 (d,  $J = 8.7$  Hz, 2H), 7.40 – 7.23 (m, 10H), 6.90 (dd,  $J = 26.3, 7.9$  Hz, 3H), 5.16 (s, 2H), 3.81 (s, 3H) ppm.

$^{13}\text{C NMR}$  (101 MHz, 23.0 °C,  $\text{CDCl}_3$ )  $\delta$  159.59, 147.94, 135.90, 132.54, 129.39, 129.10, 128.96, 127.48, 127.21, 126.05, 120.37, 114.55, 113.97, 55.32, 50.47 ppm.

**HRMS** (ESI) calcd. for  $C_{21}H_{21}N_2O$  [M+H]: 317.1654, found: 317.1653.

**Elemental Analysis** calcd for  $C_{21}H_{20}N_2O$ : C, 79.72; H, 6.37; N, 8.85; O, 5.06; found: C, 79.74; H, 6.36; N, 8.84.

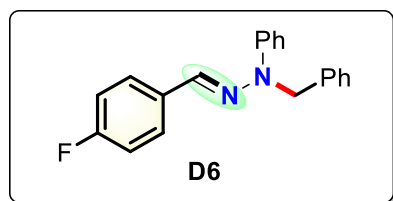

### 1-benzyl-2-(4-fluorobenzylidene)-1-phenylhydrazine (D6)

The title compound was prepared according to the general procedure and purified by column chromatography to give a yellow solid 141.5 mg, 93% yield. Purification by column chromatography on silica gel (pentane/ethyl ether = 20 : 1 – 5:1).

**$^1H$  NMR** (400 MHz, 23.0 °C,  $CDCl_3$ )  $\delta$  7.67 – 7.52 (m, 2H), 7.40 – 7.20 (m, 10H), 7.09 – 6.88 (m, 3H), 5.17 (s, 2H) ppm.

**$^{13}C$  NMR** (101 MHz, 23.0 °C,  $CDCl_3$ )  $\delta$  163.75, 161.29, 147.79, 135.57, 132.74, 131.30, 129.16, 129.02, 127.70, 127.62, 127.32, 125.99, 120.80, 115.58, 115.36, 114.77, 50.55 ppm.

**$^{19}F$  NMR** (377 MHz, 23.0 °C,  $CDCl_3$ )  $\delta$  -113.75 ppm.

**HRMS** (ESI) calcd. for  $C_{20}H_{18}FN_2$  [M+H]: 305.1454, found: 305.1455.

**Elemental Analysis** calcd for  $C_{20}H_{17}FN_2$ : C, 78.92; H, 5.63; F, 6.24; N, 9.20; found: C, 78.93; H, 5.64; N, 9.23.

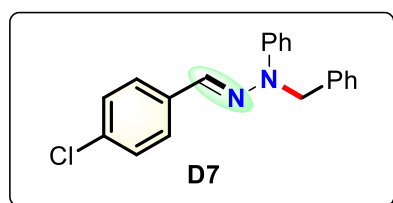

### 1-benzyl-2-(4-chlorobenzylidene)-1-phenylhydrazine (D7)

The title compound was prepared according to the general procedure and purified by column chromatography to give a yellow solid 150.8 mg, 94% yield. Purification by

column chromatography on silica gel (pentane/ethyl ether = 20 : 1 – 5:1).

**<sup>1</sup>H NMR** (400 MHz, 23.0 °C, CDCl<sub>3</sub>) δ 7.59 – 7.50 (m, 2H), 7.44 – 7.24 (m, 12H), 6.97 (t, *J* = 7.2 Hz, 1H), 5.18 (s, 2H) ppm.

**<sup>13</sup>C NMR** (101 MHz, 23.0 °C, CDCl<sub>3</sub>) δ 147.69, 135.39, 135.06, 133.32, 131.13, 129.18, 129.05, 128.66, 127.37, 127.25, 125.98, 121.03, 114.91, 50.61 ppm.

**HRMS** (ESI) calcd. for C<sub>20</sub>H<sub>18</sub>ClN<sub>2</sub> [M+H]: 321.1159, found: 321.1155.

**Elemental Analysis** calcd for C<sub>20</sub>H<sub>17</sub>ClN<sub>2</sub>: C, 74.88; H, 5.34; Cl, 11.05; N, 8.73; found: C, 74.85; H, 5.33; N, 8.74.

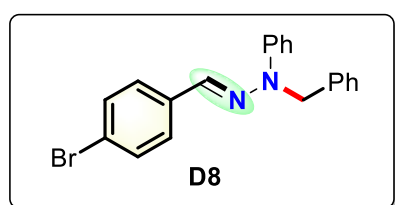

#### 1-benzyl-2-(4-bromobenzylidene)-1-phenylhydrazine (D8)

The title compound was prepared according to the general procedure and purified by column chromatography to give a yellow solid 166.2 mg, 91% yield. Purification by column chromatography on silica gel (pentane/ethyl ether = 20 : 1 – 5:1).

**<sup>1</sup>H NMR** (400 MHz, 23.0 °C, CDCl<sub>3</sub>) δ 7.46 (q, *J* = 8.7 Hz, 4H), 7.41 – 7.29 (m, 7H), 7.23 (d, *J* = 7.1 Hz, 2H), 6.97 (t, *J* = 7.2 Hz, 1H), 5.18 (s, 2H) ppm.

**<sup>13</sup>C NMR** (101 MHz, 23.0 °C, CDCl<sub>3</sub>) δ 147.70, 135.52, 135.38, 131.61, 131.13, 129.21, 129.07, 127.57, 127.40, 125.99, 121.52, 121.09, 114.95, 99.99, 50.63 ppm.

**HRMS** (ESI) calcd. for C<sub>20</sub>H<sub>18</sub>BrN<sub>2</sub> [M+H]: 365.0653, found: 365.0655.

**Elemental Analysis** calcd for C<sub>20</sub>H<sub>17</sub>BrN<sub>2</sub>: C, 65.76; H, 4.69; Br, 21.88; N, 7.67; found: C, 65.74; H, 4.66; N, 7.64.

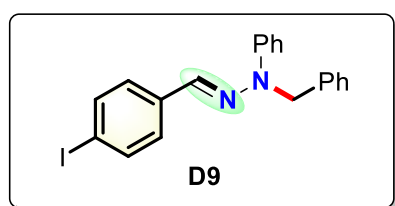

#### 1-benzyl-2-(4-iodobenzylidene)-1-phenylhydrazine (D9)

The title compound was prepared according to the general procedure and purified by column chromatography to give a yellow solid 152.5 mg, 74% yield. Purification by column chromatography on silica gel (pentane/ethyl ether = 20 : 1 – 5:1).

$^1\text{H NMR}$  (400 MHz, 23.0 °C,  $\text{CDCl}_3$ )  $\delta$  7.72 (d,  $J = 8.4$  Hz, 2H), 7.57 (s, 1H), 7.49 – 7.38 (m, 4H), 7.33 (q,  $J = 11.7, 8.0$  Hz, 4H), 7.25 (t,  $J = 7.3$  Hz, 1H), 7.19 (d,  $J = 7.2$  Hz, 2H), 6.92 (t,  $J = 7.2$  Hz, 1H), 5.32 (s, 2H) ppm.

$^{13}\text{C NMR}$  (101 MHz, 23.0 °C,  $\text{CDCl}_3$ )  $\delta$  147.42, 137.86, 136.38, 136.22, 132.02, 129.68, 129.24, 128.30, 127.48, 126.70, 120.93, 114.71, 94.11, 48.67, 40.61, 40.40, 40.19, 39.98, 39.77, 39.56, 39.36 ppm.

**HRMS** (ESI) calcd. for  $\text{C}_{20}\text{H}_{18}\text{IN}_2$  [ $\text{M}+\text{H}$ ]: 413.0515, found: 413.0517.

**Elemental Analysis** calcd for  $\text{C}_{20}\text{H}_{17}\text{IN}_2$ : C, 58.27; H, 4.16; I, 30.78; N, 6.79; found: C, 58.21; H, 4.15; N, 6.73.

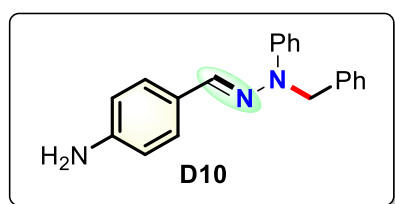

#### 4-((2-benzyl-2-phenylhydrazineylidene)methyl)aniline (D10)

The title compound was prepared according to the general procedure and purified by column chromatography to give a yellow solid 135.6 mg, 90% yield. Purification by column chromatography on silica gel (pentane/ethyl ether = 20 : 1 – 5:1).

$^1\text{H NMR}$  (400 MHz, 23.0 °C,  $\text{CDCl}_3$ )  $\delta$  7.44 (s, 1H), 7.42 (s, 1H), 7.37 (d,  $J = 7.9$  Hz, 2H), 7.34 – 7.28 (m, 5H), 7.26 (d,  $J = 4.4$  Hz, 1H), 7.22 (dd,  $J = 7.4, 3.6$  Hz, 3H), 6.90 (t,  $J = 7.2$  Hz, 1H), 6.62 (d,  $J = 8.5$  Hz, 2H), 5.12 (s, 2H), 3.69 (s, 2H) ppm.

$^{13}\text{C NMR}$  (101 MHz, 23.0 °C,  $\text{CDCl}_3$ )  $\delta$  148.12, 146.57, 136.21, 133.29, 129.14, 128.98, 127.60, 127.30, 127.20, 126.11, 120.10, 115.05, 114.42, 50.41 ppm.

**HRMS** (ESI) calcd. for  $\text{C}_{20}\text{H}_{20}\text{N}_3$  [ $\text{M}+\text{H}$ ]: 302.1657, found: 302.1656.

**Elemental Analysis** calcd for  $\text{C}_{20}\text{H}_{19}\text{N}_3$ : C, 79.70; H, 6.35; N, 13.94; found: C, 79.74; H, 6.35; N, 13.93.

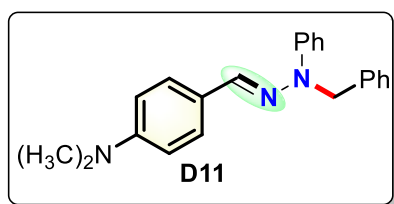

#### 4-((2-benzyl-2-phenylhydrazineylidene)methyl)-N,N-dimethylaniline (D11)

The title compound was prepared according to the general procedure and purified by column chromatography to give a yellow solid 135.1 mg, 82% yield. Purification by column chromatography on silica gel (pentane/ethyl ether = 20 : 1 – 5:1).

$^1\text{H NMR}$  (400 MHz, 23.0 °C,  $\text{CDCl}_3$ )  $\delta$  7.51 (d,  $J$  = 8.8 Hz, 2H), 7.37 (d,  $J$  = 8.9 Hz, 3H), 7.34 – 7.26 (m, 4H), 7.26 – 7.17 (m, 3H), 6.96 – 6.82 (m, 1H), 6.68 (d,  $J$  = 8.7 Hz, 2H), 5.14 (s, 2H), 2.95 (s, 6H) ppm.

$^{13}\text{C NMR}$  (101 MHz, 23.0 °C,  $\text{CDCl}_3$ )  $\delta$  150.48, 148.18, 136.35, 133.62, 129.12, 128.96, 127.41, 127.16, 126.14, 125.09, 119.92, 114.34, 112.34, 50.37, 40.53 ppm.

**HRMS** (ESI) calcd. for  $\text{C}_{22}\text{H}_{24}\text{N}_3$  [ $\text{M}+\text{H}$ ]: 330.1970, found: 330.1972.

**Elemental Analysis** calcd for  $\text{C}_{22}\text{H}_{23}\text{N}_3$ : C, 80.21; H, 7.04; N, 12.76; found: C, 80.23; H, 7.05; N, 12.75.

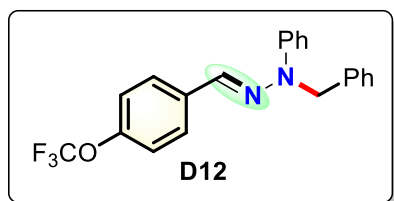

#### 1-benzyl-1-phenyl-2-(4-(trifluoromethoxy)benzylidene)hydrazine (D12)

The title compound was prepared according to the general procedure and purified by column chromatography to give a yellow solid 179.6 mg, 97% yield. Purification by column chromatography on silica gel (pentane/ethyl ether = 20 : 1 – 5:1).

$^1\text{H NMR}$  (400 MHz, 23.0 °C,  $\text{CDCl}_3$ )  $\delta$  7.59 (d,  $J$  = 8.8 Hz, 2H), 7.38 (d,  $J$  = 7.8 Hz, 2H), 7.31 (t,  $J$  = 8.3, 6.1, 3.0 Hz, 5H), 7.26 (d,  $J$  = 7.2 Hz, 1H), 7.22 – 7.17 (m, 2H), 7.14 (d,  $J$  = 8.2 Hz, 2H), 6.96 (t,  $J$  = 7.2 Hz, 1H), 5.14 (s, 2H) ppm.

$^{13}\text{C}$  NMR (101 MHz, 23.0 °C,  $\text{CDCl}_3$ )  $\delta$  148.67, 148.66, 147.77, 135.42, 130.79, 129.29, 129.15, 127.48, 127.35, 126.05, 121.18, 121.15, 115.03, 50.61 ppm.

$^{19}\text{F}$  NMR (377 MHz, 23.0 °C,  $\text{CDCl}_3$ )  $\delta$  -57.73 ppm.

HRMS (ESI) calcd. for  $\text{C}_{21}\text{H}_{18}\text{F}_3\text{N}_2\text{O}$  [M+H]: 371.1371, found: 371.1373.

Elemental Analysis calcd for  $\text{C}_{21}\text{H}_{17}\text{F}_3\text{N}_2\text{O}$ : C, 68.10; H, 4.63; F, 15.39; N, 7.56; O, 4.32; found: C, 68.17; H, 4.65; N, 7.51.

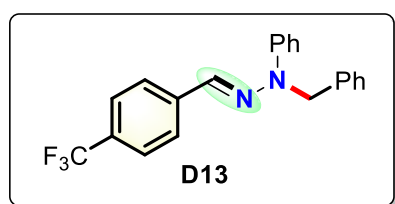

### 1-benzyl-1-phenyl-2-(4-(trifluoromethyl)benzylidene)hydrazine (D13)

The title compound was prepared according to the general procedure and purified by column chromatography to give a yellow solid 164.8 mg, 93% yield. Purification by column chromatography on silica gel (pentane/ethyl ether = 20 : 1 – 5:1).

$^1\text{H}$  NMR (400 MHz, 23.0 °C,  $\text{CDCl}_3$ )  $\delta$  7.70 (d,  $J$  = 8.2 Hz, 2H), 7.56 (d,  $J$  = 8.2 Hz, 2H), 7.42 (dd,  $J$  = 8.9, 1.1 Hz, 2H), 7.38 – 7.32 (m, 5H), 7.29 (d,  $J$  = 7.3 Hz, 1H), 7.24 (d,  $J$  = 7.0 Hz, 2H), 7.00 (t,  $J$  = 7.2 Hz, 1H), 5.21 (s, 2H) ppm.

$^{13}\text{C}$  NMR (101 MHz, 23.0 °C,  $\text{CDCl}_3$ )  $\delta$  147.58, 137.05, 135.11, 133.92, 130.58, 129.81, 129.25, 129.19, 129.12, 128.12, 127.48, 127.00, 126.11, 125.98, 125.74, 125.42, 122.25, 121.48, 118.91, 115.21, 101.79, 99.99, 50.72 ppm.

$^{19}\text{F}$  NMR (377 MHz, 23.0 °C,  $\text{CDCl}_3$ )  $\delta$  -62.42 ppm.

HRMS (ESI) calcd. for  $\text{C}_{21}\text{H}_{18}\text{F}_3\text{N}_2$  [M+H]: 355.1422, found: 355.1425.

Elemental Analysis calcd for  $\text{C}_{21}\text{H}_{17}\text{F}_3\text{N}_2$ : C, 71.18; H, 4.84; F, 16.08; N, 7.91; found: C, 71.14; H, 4.86; N, 7.93.

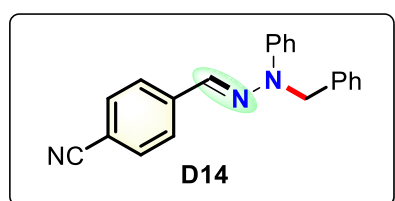

#### 4-((2-benzyl-2-phenylhydrazineylidene)methyl)benzonitrile (D14)

The title compound was prepared according to the general procedure and purified by column chromatography to give a yellow solid 133.9 mg, 86% yield. Purification by column chromatography on silica gel (pentane/ethyl ether = 20 : 1 – 5:1).

$^1\text{H NMR}$  (400 MHz, 23.0 °C,  $\text{CDCl}_3$ )  $\delta$  7.67 (d,  $J = 8.3$  Hz, 2H), 7.58 (d,  $J = 8.3$  Hz, 2H), 7.41 (d,  $J = 8.1$  Hz, 2H), 7.37 – 7.30 (m, 5H), 7.22 (d,  $J = 7.4$  Hz, 2H), 7.02 (t,  $J = 7.2$  Hz, 1H), 5.21 (s, 2H) ppm.

$^{13}\text{C NMR}$  (101 MHz, 23.0 °C,  $\text{CDCl}_3$ )  $\delta$  147.40, 140.96, 134.84, 132.32, 129.96, 129.30, 129.18, 127.58, 126.31, 125.96, 121.90, 119.23, 115.43, 110.35, 50.89 ppm.

**HRMS** (ESI) calcd. for  $\text{C}_{21}\text{H}_{18}\text{N}_3$  [ $\text{M}+\text{H}$ ]: 312.1501, found: 312.1500.

**Elemental Analysis** calcd for  $\text{C}_{21}\text{H}_{17}\text{N}_3$ : C, 81.00; H, 5.50; N, 13.49; found: C, 81.02; H, 5.55; N, 13.42.

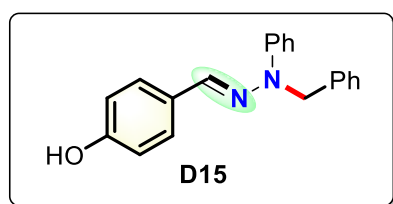

#### 4-((2-benzyl-2-phenylhydrazineylidene)methyl)phenol (D15)

The title compound was prepared according to the general procedure and purified by column chromatography to give a yellow solid 137.6 mg, 91% yield. Purification by column chromatography on silica gel (pentane/ethyl ether = 20 : 1 – 5:1).

$^1\text{H NMR}$  (400 MHz, 23.0 °C,  $\text{CDCl}_3$ )  $\delta$  7.50 (d,  $J = 8.6$  Hz, 2H), 7.41 – 7.19 (m, 11H), 6.92 (t,  $J = 7.2$  Hz, 1H), 6.77 (d,  $J = 8.6$  Hz, 2H), 5.13 (s, 2H), 4.92 (s, 1H) ppm.

$^{13}\text{C NMR}$  (101 MHz, 23.0 °C,  $\text{CDCl}_3$ )  $\delta$  155.53, 148.00, 135.95, 132.46, 129.66, 129.19, 129.03, 127.74, 127.29, 126.08, 120.47, 115.54, 114.64, 50.50 ppm.

**HRMS** (ESI) calcd. for  $\text{C}_{20}\text{H}_{19}\text{N}_2\text{O}$  [ $\text{M}+\text{H}$ ]: 303.1497, found: 303.1498.

**Elemental Analysis** calcd for  $\text{C}_{20}\text{H}_{18}\text{N}_2\text{O}$ : C, 79.44; H, 6.00; N, 9.26; O, 5.29; found: C, 79.43; H, 6.02; N, 9.24.



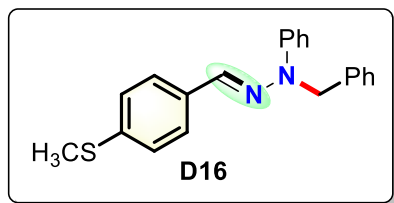

### 1-benzyl-2-(4-(methylthio)benzylidene)-1-phenylhydrazine (D16)

The title compound was prepared according to the general procedure and purified by column chromatography to give a yellow solid 151.3 mg, 91% yield. Purification by column chromatography on silica gel (pentane/ethyl ether = 20 : 1 – 5:1).

$^1\text{H NMR}$  (400 MHz, 23.0 °C,  $\text{CDCl}_3$ )  $\delta$  7.57 – 7.46 (m, 2H), 7.43 – 7.36 (m, 2H), 7.36 – 7.29 (m, 5H), 7.26 – 7.15 (m, 5H), 6.99 – 6.86 (m, 1H), 5.15 (s, 2H), 2.46 (s, 3H) ppm.

$^{13}\text{C NMR}$  (101 MHz, 23.0 °C,  $\text{CDCl}_3$ )  $\delta$  147.86, 138.14, 135.70, 133.63, 132.04, 129.20, 129.06, 128.47, 127.84, 127.34, 126.75, 126.60, 126.59, 126.07, 120.77, 114.80, 50.49, 15.89 ppm.

**HRMS** (ESI) calcd. for  $\text{C}_{21}\text{H}_{21}\text{N}_2\text{S}$  [ $\text{M}+\text{H}$ ]: 333.1425, found: 333.1423.

**Elemental Analysis** calcd for  $\text{C}_{21}\text{H}_{20}\text{N}_2\text{S}$ : C, 75.87; H, 6.06; N, 8.43; S, 9.64; found: C, 75.84; H, 6.03; N, 8.45.

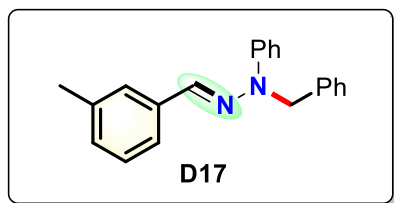

### 1-benzyl-2-(3-methylbenzylidene)-1-phenylhydrazine (D17)

The title compound was prepared according to the general procedure and purified by column chromatography to give a yellow solid 139.7 mg, 93% yield. Purification by column chromatography on silica gel (pentane/ethyl ether = 20 : 1 – 5:1).

$^1\text{H NMR}$  (400 MHz, 23.0 °C,  $\text{CDCl}_3$ )  $\delta$  7.80 (d,  $J = 7.6$  Hz, 1H), 7.51 (s, 1H), 7.36 (d,  $J = 7.9$  Hz, 2H), 7.27 (t,  $J = 8.8, 3.8, 3.2$  Hz, 4H), 7.21 – 7.18 (m, 3H), 7.16 – 6.97 (m, 3H), 6.89 (t,  $J = 7.2$  Hz, 1H), 5.13 (s, 2H), 2.15 (s, 3H) ppm.

$^{13}\text{C}$  NMR (101 MHz, 23.0 °C,  $\text{CDCl}_3$ )  $\delta$  148.06, 135.66, 135.34, 134.35, 131.82, 130.64, 129.19, 129.01, 127.66, 127.32, 126.15, 126.09, 125.72, 120.73, 114.88, 50.68, 19.74 ppm.

HRMS (ESI) calcd. for  $\text{C}_{21}\text{H}_{21}\text{N}_2$  [M+H]: 301.1705, found: 301.1707.

Elemental Analysis calcd for  $\text{C}_{21}\text{H}_{20}\text{N}_2$ : C, 83.96; H, 6.71; N, 9.33; found: C, 83.93; H, 6.73; N, 9.32.

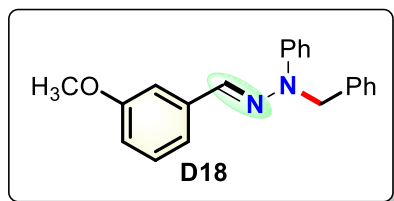

### 1-benzyl-2-(3-methoxybenzylidene)-1-phenylhydrazine (D18)

The title compound was prepared according to the general procedure and purified by column chromatography to give a yellow solid 153.5 mg, 97% yield. Purification by column chromatography on silica gel (pentane/ethyl ether = 20 : 1 – 5:1).

$^1\text{H}$  NMR (400 MHz, 23.0 °C,  $\text{CDCl}_3$ )  $\delta$  7.40 (d,  $J = 7.9$  Hz, 2H), 7.38 – 7.28 (m, 5H), 7.25 (q,  $J = 5.0, 4.6$  Hz, 5H), 7.15 (d,  $J = 7.7$  Hz, 1H), 6.96 (t,  $J = 7.2$  Hz, 1H), 6.80 (dd,  $J = 8.0, 2.0$  Hz, 1H), 5.19 (s, 2H), 3.84 (s, 3H) ppm.

$^{13}\text{C}$  NMR (101 MHz, 23.0 °C,  $\text{CDCl}_3$ )  $\delta$  159.84, 147.82, 137.98, 135.59, 132.36, 129.48, 129.17, 129.03, 127.32, 126.04, 120.84, 119.28, 114.86, 113.96, 110.63, 55.29, 50.54 ppm.

HRMS (ESI) calcd. for  $\text{C}_{21}\text{H}_{21}\text{N}_2\text{O}$  [M+H]: 317.1654, found: 317.1658.

Elemental Analysis calcd for  $\text{C}_{21}\text{H}_{20}\text{N}_2\text{O}$ : C, 79.72; H, 6.37; N, 8.85; O, 5.06; found: C, 79.76; H, 6.34; N, 8.86.

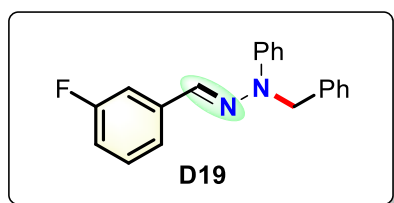

### 1-benzyl-2-(3-fluorobenzylidene)-1-phenylhydrazine (D19)

The title compound was prepared according to the general procedure and purified by column chromatography to give a yellow solid 135.4 mg, 89% yield. Purification by column chromatography on silica gel (pentane/ethyl ether = 20 : 1 – 5:1).

$^1\text{H NMR}$  (400 MHz, 23.0 °C,  $\text{CDCl}_3$ )  $\delta$  7.42 – 7.22 (m, 13H), 7.05 – 6.85 (m, 2H), 5.18 (s, 2H) ppm.

$^{13}\text{C NMR}$  (101 MHz, 23.0 °C,  $\text{CDCl}_3$ )  $\delta$  164.40, 161.97, 147.67, 139.02, 138.94, 135.33, 131.04, 131.01, 129.96, 129.88, 129.22, 129.08, 127.41, 126.00, 122.22, 122.19, 121.18, 115.02, 114.69, 114.48, 112.27, 112.04, 50.64 ppm.

$^{19}\text{F NMR}$  (377 MHz, 23.0 °C,  $\text{CDCl}_3$ )  $\delta$  -113.45 ppm.

**HRMS** (ESI) calcd. for  $\text{C}_{20}\text{H}_{18}\text{FN}_2$  [M+H]: 305.1454, found: 305.1454.

**Elemental Analysis** calcd for  $\text{C}_{20}\text{H}_{17}\text{FN}_2$ : C, 78.92; H, 5.63; F, 6.24; N, 9.20; found: C, 78.94; H, 5.65; N, 9.23.

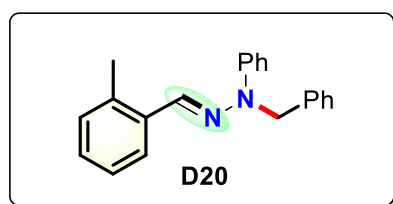

### 1-benzyl-2-(2-methylbenzylidene)-1-phenylhydrazine (D20)

The title compound was prepared according to the general procedure and purified by column chromatography to give a yellow solid 138.2 mg, 92% yield. Purification by column chromatography on silica gel (pentane/ethyl ether = 20 : 1 – 5:1).

$^1\text{H NMR}$  (400 MHz, 23.0 °C,  $\text{CDCl}_3$ )  $\delta$  7.87 (d,  $J = 7.4$  Hz, 1H), 7.58 (s, 1H), 7.43 (d,  $J = 8.0$  Hz, 2H), 7.36 – 7.30 (m, 4H), 7.26 (t,  $J = 3.1$  Hz, 2H), 7.23 – 7.11 (m, 3H), 7.09 (d,  $J = 7.2$  Hz, 1H), 6.95 (t,  $J = 7.2$  Hz, 1H), 5.19 (s, 2H), 2.22 (s, 3H) ppm.

$^{13}\text{C NMR}$  (101 MHz, 23.0 °C,  $\text{CDCl}_3$ )  $\delta$  148.07, 135.67, 135.35, 134.36, 131.82, 130.65, 129.21, 129.02, 128.77, 128.25, 127.67, 127.33, 126.16, 126.10, 125.73, 120.74, 114.88, 77.37, 77.05, 76.73, 50.68, 19.75, 0.04 ppm.

**HRMS** (ESI) calcd. for  $\text{C}_{21}\text{H}_{21}\text{N}_2$  [M+H]: 301.1705, found: 301.1704.

**Elemental Analysis** calcd for  $\text{C}_{21}\text{H}_{20}\text{N}_2$ : C, 83.96; H, 6.71; N, 9.33; found: C, 83.92;

H, 6.73; N, 9.32.

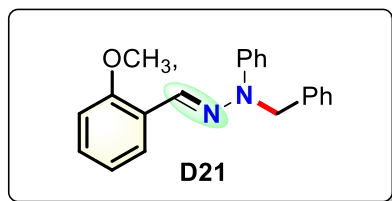

### 1-benzyl-2-(2-methoxybenzylidene)-1-phenylhydrazine (D21)

The title compound was prepared according to the general procedure and purified by column chromatography to give a yellow solid 147.1 mg, 93% yield. Purification by column chromatography on silica gel (pentane/ethyl ether = 20 : 1 – 5:1).

$^1\text{H NMR}$  (400 MHz, 23.0 °C,  $\text{CDCl}_3$ )  $\delta$  8.04 (dd,  $J = 7.7, 1.6$  Hz, 1H), 7.82 (s, 1H), 7.41 (d,  $J = 8.0$  Hz, 2H), 7.34 – 7.20 (m, 8H), 6.98 (t,  $J = 7.5$  Hz, 1H), 6.93 (t,  $J = 7.2$  Hz, 1H), 6.83 (d,  $J = 8.2$  Hz, 1H), 5.19 (s, 2H), 3.72 (s, 3H) ppm.

$^{13}\text{C NMR}$  (101 MHz, 23.0 °C,  $\text{CDCl}_3$ )  $\delta$  156.99, 148.01, 135.96, 129.11, 128.87, 128.48, 127.14, 126.28, 125.50, 125.24, 120.90, 120.45, 114.69, 111.17, 55.63, 50.27 ppm.

**HRMS** (ESI) calcd. for  $\text{C}_{21}\text{H}_{21}\text{N}_2\text{O}$  [ $\text{M}+\text{H}$ ]: 317.1654, found: 317.1655.

**Elemental Analysis** calcd for  $\text{C}_{21}\text{H}_{20}\text{N}_2\text{O}$ : C, 79.72; H, 6.37; N, 8.85; O, 5.06; found: C, 79.73; H, 6.35; N, 8.83.

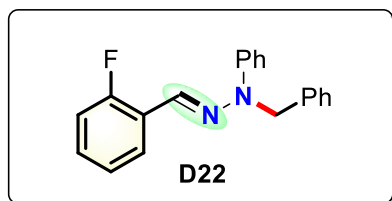

### 1-benzyl-2-(2-fluorobenzylidene)-1-phenylhydrazine (D22)

The title compound was prepared according to the general procedure and purified by column chromatography to give a yellow solid 121.7 mg, 80% yield. Purification by column chromatography on silica gel (pentane/ethyl ether = 20 : 1 – 5:1).

$^1\text{H NMR}$  (400 MHz, 23.0 °C,  $\text{CDCl}_3$ )  $\delta$  8.03 (t,  $J = 7.6, 2.0$  Hz, 1H), 7.60 (s, 1H), 7.42 (d,  $J = 7.8$  Hz, 2H), 7.34 (dd,  $J = 5.7, 5.2, 3.3$  Hz, 4H), 7.27 – 7.10 (m, 6H), 7.04 – 6.91 (m, 2H), 5.20 (s, 2H) ppm.

$^{13}\text{C}$  NMR (101 MHz, 23.0 °C,  $\text{CDCl}_3$ )  $\delta$  161.71, 147.76, 135.26, 129.17, 129.00, 128.92, 128.84, 127.35, 126.10, 125.93, 125.38, 125.32, 124.16, 121.05, 115.59, 115.38, 114.96, 50.46 ppm.

$^{19}\text{F}$  NMR (377 MHz, 23.0 °C,  $\text{CDCl}_3$ )  $\delta$  -122.56 ppm.

HRMS (ESI) calcd. for  $\text{C}_{20}\text{H}_{18}\text{FN}_2$  [M+H]: 305.1454, found: 305.1456.

Elemental Analysis calcd for  $\text{C}_{20}\text{H}_{17}\text{FN}_2$ : C, 78.92; H, 5.63; F, 6.24; N, 9.20; found: C, 78.94; H, 5.63; N, 9.23.

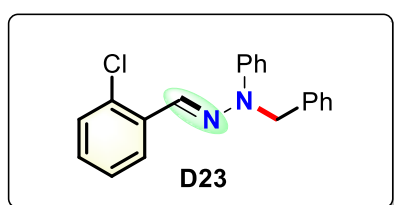

### 1-benzyl-2-(2-chlorobenzylidene)-1-phenylhydrazine (D23)

The title compound was prepared according to the general procedure and purified by column chromatography to give a yellow solid 128.3 mg, 80% yield. Purification by column chromatography on silica gel (pentane/ethyl ether = 20 : 1 – 5:1).

$^1\text{H}$  NMR (400 MHz, 23.0 °C,  $\text{CDCl}_3$ )  $\delta$  8.08 (dd,  $J = 7.8, 1.5$  Hz, 1H), 7.76 (s, 1H), 7.44 (d,  $J = 7.9$  Hz, 2H), 7.40 – 7.30 (m, 4H), 7.27 (d,  $J = 6.8$  Hz, 6H), 7.15 (t,  $J = 7.6, 1.7$  Hz, 1H), 6.99 (t,  $J = 7.2$  Hz, 1H), 5.21 (s, 2H) ppm.

$^{13}\text{C}$  NMR (101 MHz, 23.0 °C,  $\text{CDCl}_3$ )  $\delta$  147.82, 135.28, 133.79, 132.82, 129.60, 129.38, 129.22, 129.01, 128.54, 127.41, 126.79, 126.31, 126.25, 121.20, 115.14, 50.91 ppm.

HRMS (ESI) calcd. for  $\text{C}_{20}\text{H}_{18}\text{ClN}_2$  [M+H]: 321.1159, found: 321.1158.

Elemental Analysis calcd for  $\text{C}_{20}\text{H}_{17}\text{ClN}_2$ : C, 74.88; H, 5.34; Cl, 11.05; N, 8.73; found: C, 74.86; H, 5.34; N, 8.74.

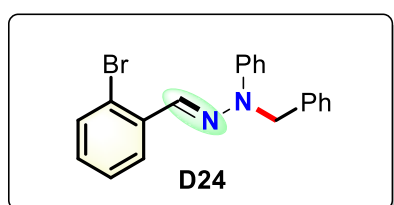

### 1-benzyl-2-(2-bromobenzylidene)-1-phenylhydrazine (D24)

The title compound was prepared according to the general procedure and purified by column chromatography to give a yellow solid 138.8 mg, 76% yield. Purification by column chromatography on silica gel (pentane/ethyl ether = 20 : 1 – 5:1).

$^1\text{H NMR}$  (400 MHz, 23.0 °C,  $\text{CDCl}_3$ )  $\delta$  8.06 (dd,  $J = 7.9, 1.6$  Hz, 1H), 7.71 (s, 1H), 7.50 – 7.42 (m, 3H), 7.37 – 7.31 (m, 4H), 7.30 – 7.24 (m, 4H), 7.12 – 7.03 (m, 1H), 6.99 (t,  $J = 7.2$  Hz, 1H), 5.20 (s, 2H) ppm.

$^{13}\text{C NMR}$  (101 MHz, 23.0 °C,  $\text{CDCl}_3$ )  $\delta$  147.86, 135.28, 135.21, 132.85, 132.04, 129.24, 129.02, 128.87, 127.44, 127.39, 126.68, 126.32, 123.19, 121.24, 115.20, 51.09 ppm.

**HRMS** (ESI) calcd. for  $\text{C}_{20}\text{H}_{18}\text{BrN}_2$  [ $\text{M}+\text{H}$ ]: 365.0653, found: 365.0653.

**Elemental Analysis** calcd for  $\text{C}_{20}\text{H}_{17}\text{BrN}_2$ : C, 65.76; H, 4.69; Br, 21.88; N, 7.67; found: C, 65.74; H, 4.63; N, 7.64.

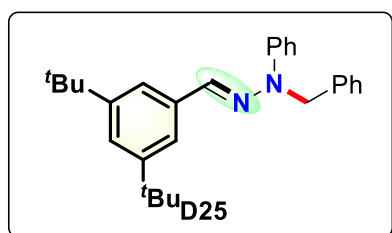

### 1-benzyl-2-(3,5-di-tert-butylbenzylidene)-1-phenylhydrazine (D25)

The title compound was prepared according to the general procedure and purified by column chromatography to give a yellow solid 187.3 mg, 94% yield. Purification by column chromatography on silica gel (pentane/ethyl ether = 20 : 1 – 5:1).

$^1\text{H NMR}$  (400 MHz, 23.0 °C,  $\text{CDCl}_3$ )  $\delta$  7.48 (d,  $J = 1.8$  Hz, 2H), 7.43 (s, 1H), 7.39 (d,  $J = 7.8$  Hz, 2H), 7.36 – 7.31 (m, 4H), 7.31 – 7.24 (m, 4H), 6.94 (t,  $J = 7.2$  Hz, 1H), 5.19 (s, 2H), 1.34 (s, 18H) ppm.

$^{13}\text{C NMR}$  (101 MHz, 23.0 °C,  $\text{CDCl}_3$ )  $\delta$  150.98, 147.95, 135.89, 135.73, 133.55, 129.15, 129.00, 127.22, 126.09, 122.42, 120.58, 120.50, 114.66, 50.40, 34.86, 31.45 ppm.

**HRMS** (ESI) calcd. for  $\text{C}_{28}\text{H}_{35}\text{N}_2$  [ $\text{M}+\text{H}$ ]: 399.2800, found: 399.2803.

**Elemental Analysis** calcd for C<sub>28</sub>H<sub>34</sub>N<sub>2</sub>: C, 84.37; H, 8.60; N, 7.03; found: C, 84.34; H, 8.62; N, 7.04.

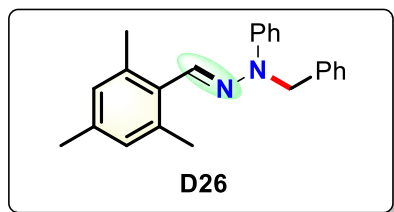

**1-benzyl-1-phenyl-2-(2,4,6-trimethylbenzylidene)hydrazine (D26)**

The title compound was prepared according to the general procedure and purified by column chromatography to give a yellow solid 136.3 mg, 83% yield. Purification by column chromatography on silica gel (pentane/ethyl ether = 20 : 1 – 5:1).

**<sup>1</sup>H NMR** (400 MHz, 23.0 °C, CDCl<sub>3</sub>) δ 7.58 (s, 1H), 7.38 – 7.24 (m, 10H), 6.93 (t, *J* = 7.1 Hz, 1H), 6.83 (s, 2H), 5.21 (s, 2H), 2.27 (s, 6H), 2.25 (s, 3H) ppm.

**<sup>13</sup>C NMR** (101 MHz, 23.0 °C, CDCl<sub>3</sub>) δ 148.25, 136.95, 136.50, 135.75, 133.64, 130.06, 129.40, 129.18, 128.99, 127.27, 126.14, 120.37, 114.51, 50.19, 21.45, 21.01 ppm.

**HRMS** (ESI) calcd. for C<sub>23</sub>H<sub>25</sub>N<sub>2</sub> [M+H]: 329.2018, found: 329.2017.

**Elemental Analysis** calcd for C<sub>23</sub>H<sub>24</sub>N<sub>2</sub>: C, 84.11; H, 7.37; N, 8.53; found: C, 84.14; H, 7.34; N, 8.52.

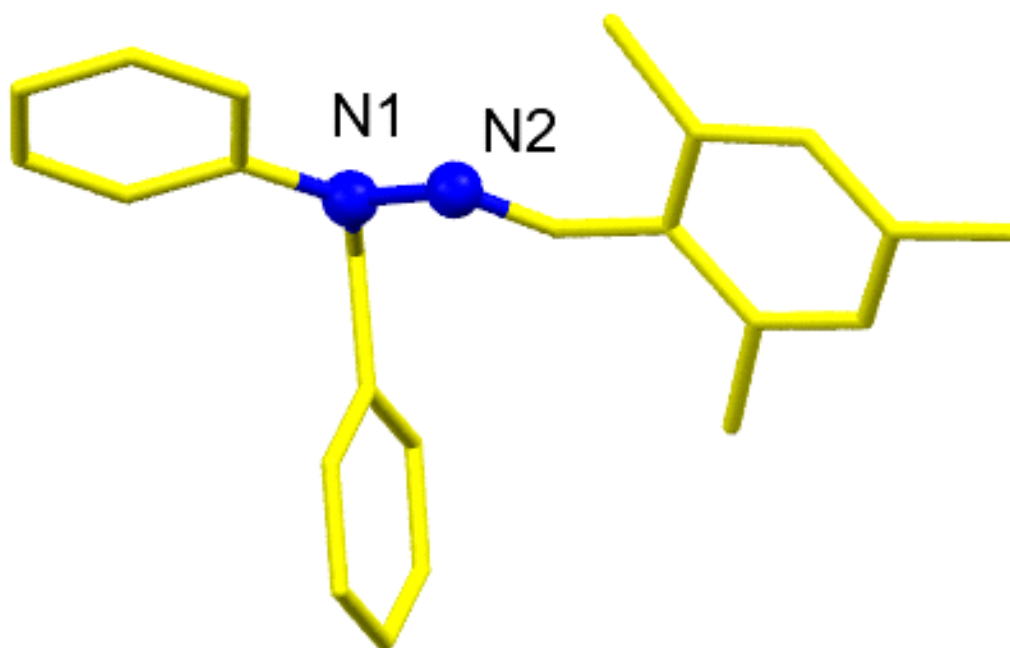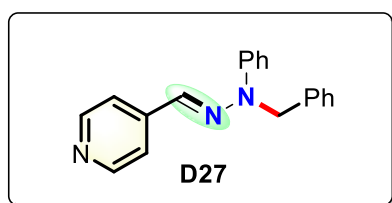

#### 4-((2-benzyl-2-phenylhydrazineylidene)methyl)pyridine (D27)

The title compound was prepared according to the general procedure and purified by column chromatography to give a yellow solid 102.1 mg, 71% yield. Purification by column chromatography on silica gel (pentane/ethyl ether = 20 : 1 – 5:1).

$^1\text{H NMR}$  (400 MHz, 23.0 °C,  $\text{CDCl}_3$ )  $\delta$  8.53 (d,  $J = 4.9$  Hz, 2H), 7.48 – 7.21 (m, 12H), 7.03 (t,  $J = 7.2$  Hz, 1H), 5.21 (s, 2H) ppm.

$^{13}\text{C NMR}$  (101 MHz, 23.0 °C,  $\text{CDCl}_3$ )  $\delta$  149.71, 147.34, 134.70, 129.30, 129.18, 127.60, 125.95, 122.05, 120.26, 115.53, 50.92 ppm.

**HRMS** (ESI) calcd. for  $\text{C}_{19}\text{H}_{18}\text{N}_3$  [ $\text{M}+\text{H}$ ]: 288.1501, found: 288.1500.

**Elemental Analysis** calcd for  $\text{C}_{19}\text{H}_{17}\text{N}_3$ : C, 79.41; H, 5.96; N, 14.62; found: C, 79.42; H, 5.94; N, 14.67.



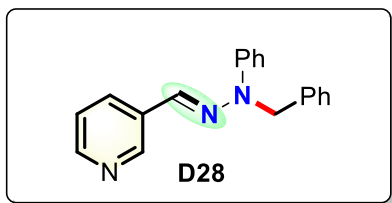

### 3-((2-benzyl-2-phenylhydrazineylidene)methyl)pyridine (D28)

The title compound was prepared according to the general procedure and purified by column chromatography to give a yellow solid 120.7 mg, 84% yield. Purification by column chromatography on silica gel (pentane/ethyl ether = 20 : 1 – 5:1).

$^1\text{H NMR}$  (400 MHz, 23.0 °C,  $\text{CDCl}_3$ )  $\delta$  8.71 (s, 1H), 8.46 (d,  $J = 3.9$  Hz, 1H), 8.02 (d,  $J = 7.9, 1.8$  Hz, 1H), 7.44 – 7.33 (m, 6H), 7.26 (d,  $J = 4.3$  Hz, 5H), 7.00 (t,  $J = 7.2$  Hz, 1H), 5.21 (s, 2H) ppm.

$^{13}\text{C NMR}$  (101 MHz, 23.0 °C,  $\text{CDCl}_3$ )  $\delta$  148.49, 148.12, 147.57, 135.10, 132.44, 129.26, 129.14, 128.76, 127.51, 125.98, 123.55, 121.42, 115.10, 50.66 ppm.

**HRMS** (ESI) calcd. for  $\text{C}_{19}\text{H}_{18}\text{N}_3$  [ $\text{M}+\text{H}$ ]: 288.1501, found: 288.1501.

**Elemental Analysis** calcd for  $\text{C}_{19}\text{H}_{17}\text{N}_3$ : C, 79.41; H, 5.96; N, 14.62; found: C, 79.48; H, 5.94; N, 14.63.

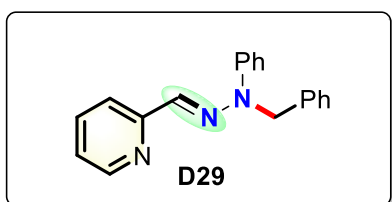

### 2-((2-benzyl-2-phenylhydrazineylidene)methyl)pyridine (D29)

The title compound was prepared according to the general procedure and purified by column chromatography to give a yellow solid 137.9 mg, 96% yield. Purification by column chromatography on silica gel (pentane/ethyl ether = 20 : 1 – 5:1).

$^1\text{H NMR}$  (400 MHz, 23.0 °C,  $\text{CDCl}_3$ )  $\delta$  8.45 (dd,  $J = 4.9, 1.7, 0.9$  Hz, 1H), 8.04 (dd,  $J = 8.1, 0.9$  Hz, 1H), 7.65 (t,  $J = 7.5, 1.3$  Hz, 1H), 7.43 (d,  $J = 9.0, 1.6$  Hz, 2H), 7.39 – 7.29 (m, 4H), 7.26 – 7.20 (m, 3H), 7.10 (dd,  $J = 7.4, 4.9, 1.2$  Hz, 1H), 7.06 – 6.92 (m, 1H), 5.22 (s, 2H) ppm.

$^{13}\text{C}$  NMR (101 MHz, 23.0 °C,  $\text{CDCl}_3$ )  $\delta$  155.72, 149.00, 147.59, 136.17, 134.92, 133.25, 129.24, 129.05, 127.42, 126.05, 122.10, 121.51, 119.31, 115.27, 50.80 ppm.

HRMS (ESI) calcd. for  $\text{C}_{19}\text{H}_{18}\text{N}_3$  [M+H]: 288.1501, found: 288.1505.

Elemental Analysis calcd for  $\text{C}_{19}\text{H}_{17}\text{N}_3$ : C, 79.41; H, 5.96; N, 14.62; found: C, 79.45; H, 5.94; N, 14.63.

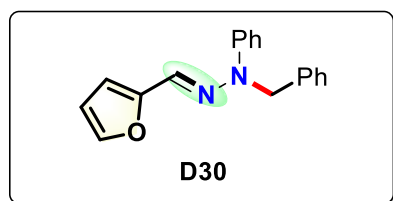

### 1-benzyl-2-(furan-2-ylmethylene)-1-phenylhydrazine (D30)

The title compound was prepared according to the general procedure and purified by column chromatography to give a yellow solid 99.5 mg, 72% yield. Purification by column chromatography on silica gel (pentane/ethyl ether = 20 : 1 – 5:1).

$^1\text{H}$  NMR (400 MHz, 23.0 °C,  $\text{CDCl}_3$ )  $\delta$  7.46 – 7.26 (m, 9H), 7.23 (d,  $J$  = 7.0 Hz, 2H), 6.96 (t,  $J$  = 7.2 Hz, 1H), 6.46 (d,  $J$  = 3.3 Hz, 1H), 6.41 (d,  $J$  = 1.8 Hz, 1H), 5.14 (s, 2H) ppm.

$^{13}\text{C}$  NMR (101 MHz, 23.0 °C,  $\text{CDCl}_3$ )  $\delta$  151.99, 147.61, 142.33, 135.31, 129.18, 129.06, 127.40, 126.02, 123.42, 121.04, 115.06, 111.49, 108.03, 50.72 ppm.

HRMS (ESI) calcd. for  $\text{C}_{18}\text{H}_{17}\text{N}_2\text{O}$  [M+H]: 277.1341, found: 277.1340.

Elemental Analysis calcd for  $\text{C}_{18}\text{H}_{16}\text{N}_2\text{O}$ : C, 78.24; H, 5.84; N, 10.14; O, 5.79; found: C, 78.22; H, 5.88; N, 10.19.

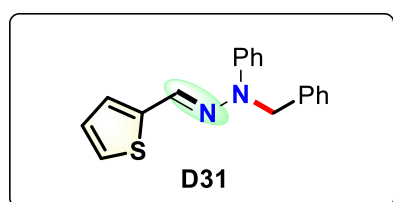

### 1-benzyl-1-phenyl-2-(thiophen-2-ylmethylene)hydrazine (D31)

The title compound was prepared according to the general procedure and purified by

column chromatography to give a yellow solid 133.1 mg, 91% yield. Purification by column chromatography on silica gel (pentane/ethyl ether = 20 : 1 – 5:1).

**<sup>1</sup>H NMR** (400 MHz, 23.0 °C, CDCl<sub>3</sub>) δ 7.55 (s, 1H), 7.38 – 7.24 (m, 9H), 7.21 – 7.15 (m, 1H), 6.95 (t, *J* = 3.9 Hz, 3H), 5.15 (s, 2H) ppm.

**<sup>13</sup>C NMR** (101 MHz, 23.0 °C, CDCl<sub>3</sub>) δ 147.47, 142.42, 135.45, 129.18, 129.07, 127.58, 127.39, 127.14, 126.02, 125.83, 125.09, 120.84, 114.74, 50.76 ppm.

**HRMS** (ESI) calcd. for C<sub>18</sub>H<sub>17</sub>N<sub>2</sub>S [M+H]: 293.1112, found: 293.1110.

**Elemental Analysis** calcd for C<sub>18</sub>H<sub>16</sub>N<sub>2</sub>S: C, 73.94; H, 5.52; N, 9.58; S, 10.96; found: C, 73.99; H, 5.51; N, 9.57.

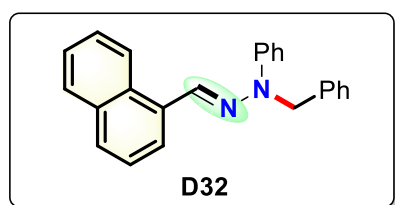

#### **(1-benzyl-2-(naphthalen-1-ylmethylene)-1-phenylhydrazine (D32)**

The title compound was prepared according to the general procedure and purified by column chromatography to give a yellow solid 1146.4 mg, 87% yield. Purification by column chromatography on silica gel (pentane/ethyl ether = 20 : 1 – 5:1).

**<sup>1</sup>H NMR** (400 MHz, 23.0 °C, CDCl<sub>3</sub>) δ 8.28 (dd, *J* = 6.3, 3.5 Hz, 1H), 8.07 (s, 1H), 7.97 – 7.88 (m, 1H), 7.83 (dd, *J* = 6.2, 3.4 Hz, 1H), 7.76 (d, *J* = 8.2 Hz, 1H), 7.52 – 7.41 (m, 5H), 7.42 – 7.26 (m, 7H), 7.06 – 6.91 (m, 1H), 5.30 (s, 2H) ppm.

**<sup>13</sup>C NMR** (101 MHz, 23.0 °C, CDCl<sub>3</sub>) δ 164.65, 162.19, 147.69, 138.58, 138.51, 136.33, 132.68, 130.70, 130.62, 129.23, 128.56, 128.04, 126.24, 121.65, 121.62, 121.01, 114.86, 114.48, 114.27, 113.24, 113.02, 50.14 ppm.

**HRMS** (ESI) calcd. for C<sub>24</sub>H<sub>21</sub>N<sub>2</sub> [M+H]: 337.1705, found: 337.1704.

**Elemental Analysis** calcd for C<sub>24</sub>H<sub>20</sub>N<sub>2</sub>: C, 85.68; H, 5.99; N, 8.33; found: C, 85.65; H, 5.98; N, 8.36.

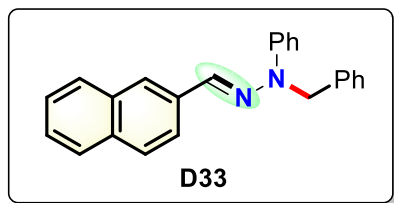

### 1-benzyl-2-(naphthalen-2-ylmethylene)-1-phenylhydrazine (D33)

The title compound was prepared according to the general procedure and purified by column chromatography to give a yellow solid 156.4 mg, 93% yield. Purification by column chromatography on silica gel (pentane/ethyl ether = 20 : 1 – 5:1).

<sup>1</sup>H NMR (400 MHz, 23.0 °C, CDCl<sub>3</sub>) δ 8.06 (dd, *J* = 8.6, 1.5 Hz, 1H), 7.87 – 7.71 (m, 4H), 7.56 (s, 1H), 7.52 – 7.39 (m, 4H), 7.36 (q, *J* = 8.8, 6.9, 4.7 Hz, 4H), 7.29 (t, *J* = 6.0 Hz, 3H), 6.98 (t, *J* = 7.2 Hz, 1H), 5.24 (s, 2H) ppm.

<sup>13</sup>C NMR (101 MHz, 23.0 °C, CDCl<sub>3</sub>) δ 147.93, 135.73, 134.35, 133.57, 133.34, 132.74, 129.27, 129.12, 128.30, 127.95, 127.86, 127.40, 126.61, 126.32, 126.11, 125.96, 123.15, 120.92, 114.95, 50.60 ppm.

HRMS (ESI) calcd. for C<sub>24</sub>H<sub>21</sub>N<sub>2</sub> [M+H]: 337.1705, found: 337.1705.

Elemental Analysis calcd for C<sub>24</sub>H<sub>20</sub>N<sub>2</sub>: C, 85.68; H, 5.99; N, 8.33; found: C, 85.67; H, 5.96; N, 8.34.

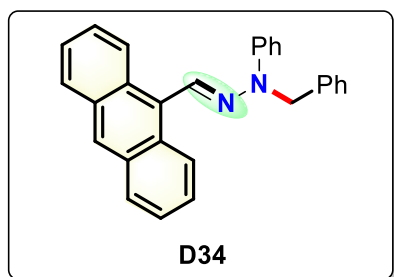

### 2-(anthracen-9-ylmethylene)-1-benzyl-1-phenylhydrazine (D34)

The title compound was prepared according to the general procedure and purified by column chromatography to give a yellow solid 160.4 mg, 83% yield. Purification by column chromatography on silica gel (pentane/ethyl ether = 20 : 1 – 5:1).

<sup>1</sup>H NMR (400 MHz, 23.0 °C, CDCl<sub>3</sub>) δ 8.57 (s, 1H), 8.48 (s, 1H), 8.24 (d, *J* = 8.8 Hz, 2H), 8.09 (d, *J* = 8.1 Hz, 2H), 7.64 – 7.20 (m, 12H), 6.95 (t, *J* = 7.2 Hz, 1H), 5.64 (s, 2H) ppm.

$^{13}\text{C}$  NMR (101 MHz, 23.0 °C,  $\text{CDCl}_3$ )  $\delta$  148.01, 136.52, 131.98, 131.52, 129.83, 129.52, 129.45, 129.20, 128.40, 127.78, 127.64, 126.97, 126.68, 126.33, 125.81, 125.51, 123.96, 120.99, 114.69, 48.88, 40.61, 40.40, 40.19, 39.98, 39.77, 39.57, 39.36 ppm.

HRMS (ESI) calcd. for  $\text{C}_{28}\text{H}_{23}\text{N}_2$  [M+H]: 387.1861, found: 387.1863.

Elemental Analysis calcd for  $\text{C}_{28}\text{H}_{22}\text{N}_2$ : C, 87.01; H, 5.74; N, 7.25; found: C, 87.04; H, 5.75; N, 7.27.

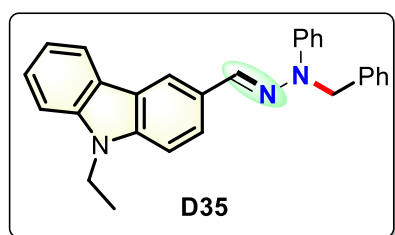

### 3-((2-benzyl-2-phenylhydrazineylidene)methyl)-9-ethyl-9H-carbazole (D35)

The title compound was prepared according to the general procedure and purified by column chromatography to give a yellow solid 185.6 mg, 92% yield. Purification by column chromatography on silica gel (pentane/ethyl ether = 20 : 1 – 5:1).

$^1\text{H}$  NMR (400 MHz, 23.0 °C,  $\text{CDCl}_3$ )  $\delta$  8.35 – 8.17 (m, 1H), 8.09 (d,  $J$  = 7.7 Hz, 1H), 7.88 (dd,  $J$  = 8.6, 1.5 Hz, 1H), 7.63 (s, 1H), 7.51 – 7.42 (m, 3H), 7.41 – 7.28 (m, 8H), 7.22 (t,  $J$  = 7.4 Hz, 1H), 6.94 (t,  $J$  = 7.2 Hz, 1H), 5.23 (s, 2H), 4.35 (q,  $J$  = 7.2 Hz, 2H), 1.42 (t,  $J$  = 7.2 Hz, 3H) ppm.

$^{13}\text{C}$  NMR (101 MHz, 23.0 °C,  $\text{CDCl}_3$ )  $\delta$  148.16, 140.33, 140.01, 136.20, 134.21, 129.17, 129.01, 127.83, 127.23, 126.15, 125.77, 124.07, 123.11, 123.04, 120.59, 120.24, 119.04, 118.92, 114.60, 108.62, 50.62, 37.66, 13.84 ppm.

HRMS (ESI) calcd. for  $\text{C}_{28}\text{H}_{26}\text{N}_3$  [M+H]: 404.2127, found: 404.2126.

Elemental Analysis calcd for  $\text{C}_{28}\text{H}_{25}\text{N}_3$ : C, 83.34; H, 6.24; N, 10.41; found: C, 83.38; H, 6.29; N, 10.47.

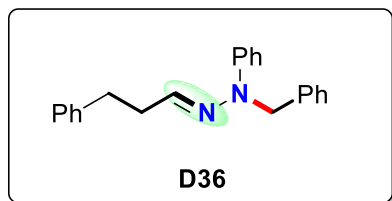

### 1-benzyl-1-phenyl-2-(3-phenylpropylidene)hydrazine (D36)

The title compound was prepared according to the general procedure and purified by column chromatography to give a yellow solid 111.6 mg, 71% yield. Purification by column chromatography on silica gel (pentane/ethyl ether = 20 : 1 – 5:1).

$^1\text{H NMR}$  (400 MHz, 23.0 °C,  $\text{CDCl}_3$ )  $\delta$  7.46 – 7.26 (m, 6H), 7.25 – 7.21 (m, 3H), 7.19 – 7.12 (m, 3H), 7.12 – 7.06 (m, 2H), 6.92 – 6.81 (m, 1H), 6.72 (t,  $J = 5.0$  Hz, 1H), 4.98 (s, 2H), 2.81 (t,  $J = 7.7$  Hz, 2H), 2.67 – 2.51 (m, 2H) ppm.

$^{13}\text{C NMR}$  (101 MHz, 23.0 °C,  $\text{CDCl}_3$ )  $\delta$  148.22, 141.49, 136.19, 135.35, 129.12, 128.99, 128.90, 128.55, 128.51, 128.45, 128.36, 128.32, 127.12, 126.09, 125.87, 119.97, 114.25, 50.47, 34.74, 33.78 ppm.

**HRMS** (ESI) calcd. for  $\text{C}_{22}\text{H}_{23}\text{N}_2$  [ $\text{M}+\text{H}$ ]: 315.1861, found: 315.1863.

**Elemental Analysis** calcd for  $\text{C}_{22}\text{H}_{22}\text{N}_2$ : C, 84.04; H, 7.05; N, 8.91; found: C, 84.08; H, 7.02; N, 8.95.

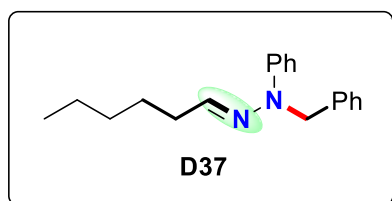

### 1-benzyl-2-pentylidene-1-phenylhydrazine (D37)

The title compound was prepared according to the general procedure and purified by column chromatography to give a yellow solid 83.9 mg, 63% yield. Purification by column chromatography on silica gel (pentane/ethyl ether = 20 : 1 – 5:1).

$^1\text{H NMR}$  (400 MHz, 23.0 °C,  $\text{CDCl}_3$ )  $\delta$  7.31 (t,  $J = 7.3$  Hz, 2H), 7.27 – 7.21 (m, 5H), 7.16 (d,  $J = 7.1$  Hz, 2H), 6.86 (dd,  $J = 8.4, 5.3, 3.2$  Hz, 1H), 6.70 (t,  $J = 5.3$  Hz, 1H), 4.98 (s, 2H), 2.32 – 2.23 (m, 2H), 1.44 (p,  $J = 7.2$  Hz, 2H), 1.30 (p,  $J = 14.7, 7.2$  Hz,

2H), 0.88 (t,  $J = 7.3$  Hz, 3H) ppm.

$^{13}\text{C}$  NMR (101 MHz, 23.0 °C,  $\text{CDCl}_3$ )  $\delta$  148.57, 137.14, 136.67, 129.39, 129.13, 127.35, 126.37, 120.06, 114.43, 50.73, 32.95, 29.83, 22.51, 14.24 ppm.

HRMS (ESI) calcd. for  $\text{C}_{18}\text{H}_{23}\text{N}_2$  [M+H]: 267.1861, found: 267.1860.

Elemental Analysis calcd for  $\text{C}_{18}\text{H}_{22}\text{N}_2$ : C, 81.16; H, 8.32; N, 10.52; found: C, 81.17; H, 8.34; N, 10.51.

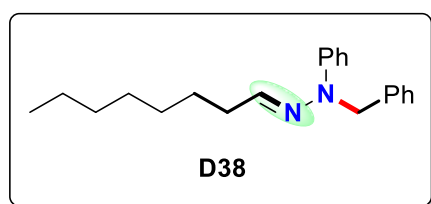

### 1-benzyl-2-octylidene-1-phenylhydrazine (D38)

The title compound was prepared according to the general procedure and purified by column chromatography to give a yellow solid 100.1 mg, 68% yield. Purification by column chromatography on silica gel (pentane/ethyl ether = 20 : 1 – 5:1).

$^1\text{H}$  NMR (400 MHz, 23.0 °C,  $\text{CDCl}_3$ )  $\delta$  7.53 – 7.07 (m, 13H), 6.85 (dd,  $J = 6.4, 2.9$  Hz, 1H), 6.69 (t,  $J = 5.2$  Hz, 1H), 4.98 (s, 2H), 2.37 – 2.12 (m, 2H), 1.49 – 1.41 (m, 2H), 1.26 (d,  $J = 13.8$  Hz, 10H), 0.87 (t,  $J = 6.8$  Hz, 3H) ppm.

$^{13}\text{C}$  NMR (101 MHz, 23.0 °C,  $\text{CDCl}_3$ )  $\delta$  148.30, 136.92, 136.39, 129.10, 128.97, 128.85, 128.51, 128.26, 128.03, 127.44, 127.07, 126.09, 119.77, 114.16, 113.53, 50.44, 32.97, 31.83, 29.16, 29.08, 27.45, 22.68, 14.15 ppm.

HRMS (ESI) calcd. for  $\text{C}_{20}\text{H}_{27}\text{N}_2$  [M+H]: 295.2174, found: 295.2172.

Elemental Analysis calcd for  $\text{C}_{20}\text{H}_{26}\text{N}_2$ : C, 81.58; H, 8.90; N, 9.51; found: C, 81.59; H, 8.93; N, 9.56.

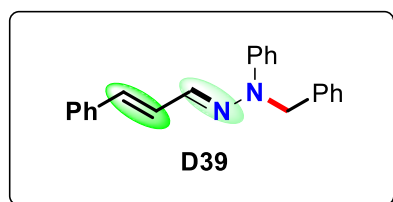

### 1-benzyl-1-phenyl-2-(3-phenylallylidene)hydrazine (D39)

The title compound was prepared according to the general procedure and purified by column chromatography to give a yellow solid 126.5 mg, 81% yield. Purification by column chromatography on silica gel (pentane/ethyl ether = 20 : 1 – 5:1).

$^1\text{H NMR}$  (400 MHz, 23.0 °C,  $\text{CDCl}_3$ )  $\delta$  7.42 – 7.28 (m, 12H), 7.24 – 7.18 (m, 3H), 7.10 – 7.01 (m, 1H), 6.95 (t,  $J = 6.8$  Hz, 1H), 6.56 (d,  $J = 16.0$  Hz, 1H), 5.13 (s, 2H) ppm.

$^{13}\text{C NMR}$  (101 MHz, 23.0 °C,  $\text{CDCl}_3$ )  $\delta$  147.56, 137.04, 135.63, 135.41, 133.35, 129.17, 129.05, 128.67, 127.66, 127.39, 127.34, 126.34, 126.01, 120.93, 114.90, 50.70 ppm.

**HRMS** (ESI) calcd. for  $\text{C}_{22}\text{H}_{21}\text{N}_2$  [M+H]: 313.1705, found: 313.1704.

**Elemental Analysis** calcd for  $\text{C}_{22}\text{H}_{20}\text{N}_2$ : C, 84.58; H, 6.45; N, 8.97; found: C, 84.57; H, 6.44; N, 8.91.

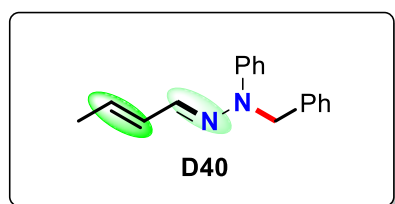

### 1-benzyl-2-but-2-en-1-ylidene-1-phenylhydrazine (D40)

The title compound was prepared according to the general procedure and purified by column chromatography to give a yellow solid 100.1 mg, 80% yield. Purification by column chromatography on silica gel (pentane/ethyl ether = 20 : 1 – 5:1).

$^1\text{H NMR}$  (400 MHz, 23.0 °C,  $\text{CDCl}_3$ )  $\delta$  7.31 – 7.19 (m, 7H), 7.16 (t,  $J = 6.8$  Hz, 2H), 7.09 (d,  $J = 8.8$  Hz, 1H), 6.88 (t,  $J = 8.4, 5.9, 2.4$  Hz, 1H), 6.31 (dd,  $J = 15.5, 8.8, 1.6$  Hz, 1H), 5.71 (dd,  $J = 15.5, 6.8$  Hz, 1H), 5.01 (s, 2H), 1.77 (d,  $J = 6.8$  Hz, 3H) ppm.

$^{13}\text{C NMR}$  (101 MHz, 23.0 °C,  $\text{CDCl}_3$ )  $\delta$  147.86, 136.09, 135.78, 131.68, 130.33, 129.16, 129.01, 127.25, 126.07, 120.40, 114.59, 50.45, 18.39 ppm.

**HRMS** (ESI) calcd. for  $\text{C}_{17}\text{H}_{19}\text{N}_2$  [M+H]: 251.1548, found: 251.1546.

**Elemental Analysis** calcd for  $\text{C}_{17}\text{H}_{18}\text{N}_2$ : C, 81.56; H, 7.25; N, 11.19; found: C, 81.58; H, 7.22; N, 11.15.



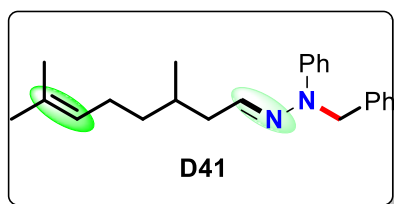

### 1-benzyl-2-(3,7-dimethyloct-6-en-1-ylidene)-1-phenylhydrazine (D41)

The title compound was prepared according to the general procedure and purified by column chromatography to give a yellow solid 118.8 mg, 71% yield. Purification by column chromatography on silica gel (pentane/ethyl ether = 20 : 1 – 5:1).

<sup>1</sup>H NMR (400 MHz, 23.0 °C, CDCl<sub>3</sub>) δ 7.48 – 7.26 (m, 8H), 7.17 (d, *J* = 7.1 Hz, 2H), 6.93 – 6.80 (m, 1H), 6.67 (t, *J* = 5.6 Hz, 1H), 5.00 (s, 2H), 2.27 (d, *J* = 14.1, 5.7 Hz, 1H), 2.13 (dd, *J* = 14.0, 7.4, 5.9 Hz, 1H), 1.94 (d, *J* = 16.4, 8.7 Hz, 2H), 1.67 – 1.64 (m, 3H), 1.57 (s, 3H), 1.34 – 1.21 (m, 2H), 1.16 – 1.08 (m, 1H), 0.82 (d, *J* = 6.7 Hz, 3H) ppm.

<sup>13</sup>C NMR (101 MHz, 23.0 °C, CDCl<sub>3</sub>) δ 163.3, 160.0, 141.5, 141.5, 127.1, 127.0, 115.4, 115.2, 69.8, 25.3 ppm.

HRMS (ESI) calcd. for C<sub>23</sub>H<sub>31</sub>N<sub>2</sub> [M+H]: 335.2487, found: 335.2485.

Elemental Analysis calcd for C<sub>23</sub>H<sub>30</sub>N<sub>2</sub>: C, 82.59; H, 9.04; N, 8.37; found: C, 82.57; H, 9.05; N, 8.36.

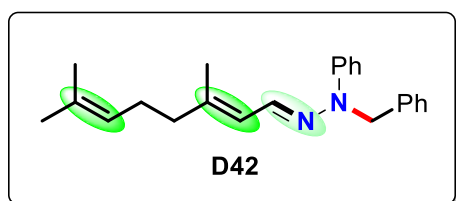

### 1-benzyl-2-(3,7-dimethylocta-2,6-dien-1-ylidene)-1-phenylhydrazine (D42)

The title compound was prepared according to the general procedure and purified by column chromatography to give a yellow solid 136.3 mg, 82% yield. Purification by column chromatography on silica gel (pentane/ethyl ether = 20 : 1 – 5:1).

<sup>1</sup>H NMR (400 MHz, 23.0 °C, CDCl<sub>3</sub>) δ 7.39 – 7.13 (m, 11H), 6.94 – 6.80 (m, 1H), 5.13

– 5.07 (m, 1H), 5.03 (d,  $J = 5.0$  Hz, 2H), 2.09 (q,  $J = 11.7, 8.4$  Hz, 2H), 2.05 – 1.97 (m, 1H), 1.92 (q,  $J = 7.2$  Hz, 1H), 1.85 – 1.76 (m, 2H), 1.67 (s, 2H), 1.61 (s, 3H), 1.59 (s, 1H), 1.46 (s, 1H) ppm.

$^{13}\text{C}$  NMR (101 MHz, 23.0 °C,  $\text{CDCl}_3$ )  $\delta$  148.03, 141.79, 141.49, 136.26, 136.24, 133.53, 132.09, 131.94, 129.17, 129.04, 129.02, 128.49, 127.86, 127.28, 127.26, 126.18, 126.11, 123.93, 123.89, 123.66, 123.05, 120.36, 120.32, 114.68, 114.66, 50.88, 50.83, 40.14, 32.81, 26.78, 26.54, 25.81, 25.80, 24.23, 17.80, 17.67, 17.06 ppm.

HRMS (ESI) calcd. for  $\text{C}_{23}\text{H}_{29}\text{N}_2$  [M+H]: 333.2331, found: 333.2330.

Elemental Analysis calcd for  $\text{C}_{23}\text{H}_{28}\text{N}_2$ : C, 83.09; H, 8.49; N, 8.43; found: C, 83.08; H, 8.45; N, 8.41.

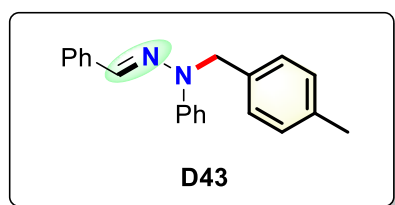

### 2-benzylidene-1-(4-methylbenzyl)-1-phenylhydrazine (D43)

The title compound was prepared according to the general procedure and purified by column chromatography to give a yellow solid 136.7 mg, 91% yield. Purification by column chromatography on silica gel (pentane/ethyl ether = 20 : 1 – 5:1).

$^1\text{H}$  NMR (400 MHz, 23.0 °C,  $\text{CDCl}_3$ )  $\delta$  7.60 (d,  $J = 7.9$  Hz, 2H), 7.42 – 7.34 (m, 3H), 7.30 (t,  $J = 7.1$  Hz, 4H), 7.25 – 7.19 (m, 1H), 7.11 (s, 4H), 7.03 – 6.87 (m, 1H), 5.11 (s, 2H), 2.30 (s, 3H) ppm.

$^{13}\text{C}$  NMR (101 MHz, 23.0 °C,  $\text{CDCl}_3$ )  $\delta$  148.00, 137.01, 136.70, 132.63, 132.51, 129.79, 129.25, 128.60, 126.29, 126.08, 120.77, 114.88, 50.27, 21.16 ppm.

HRMS (ESI) calcd. for  $\text{C}_{21}\text{H}_{21}\text{N}_2$  [M+H]: 301.1705, found: 301.1705.

Elemental Analysis calcd for  $\text{C}_{21}\text{H}_{20}\text{N}_2$ : C, 83.96; H, 6.71; N, 9.33; found: C, 83.97; H, 6.74; N, 9.31.

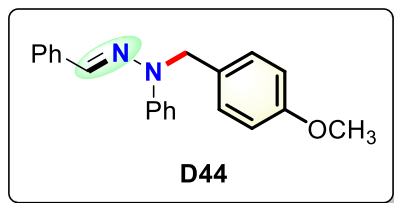

### 2-benzylidene-1-(4-methoxybenzyl)-1-phenylhydrazine (D44)

The title compound was prepared according to the general procedure and purified by column chromatography to give a yellow solid 142.4 mg, 90% yield. Purification by column chromatography on silica gel (pentane/ethyl ether = 20 : 1 – 5:1).

<sup>1</sup>H NMR (400 MHz, 23.0 °C, CDCl<sub>3</sub>) δ 7.62 (d, *J* = 7.7 Hz, 2H), 7.43 – 7.37 (m, 3H), 7.32 (td, *J* = 8.8, 8.1, 2.6 Hz, 4H), 7.26 – 7.20 (m, 1H), 7.14 (d, *J* = 8.5 Hz, 2H), 6.94 (t, *J* = 7.2 Hz, 1H), 6.86 (d, *J* = 8.6 Hz, 2H), 5.11 (s, 2H), 3.77 (s, 3H) ppm.

<sup>13</sup>C NMR (101 MHz, 23.0 °C, CDCl<sub>3</sub>) δ 166.49, 158.84, 147.88, 136.59, 132.49, 129.15, 128.51, 127.82, 127.40, 127.20, 126.17, 122.34, 120.70, 115.01, 114.82, 114.43, 99.99, 55.31, 49.92 ppm.

HRMS (ESI) calcd. for C<sub>21</sub>H<sub>21</sub>N<sub>2</sub>O [M+H]: 317.1654, found: 317.1653.

Elemental Analysis calcd for C<sub>21</sub>H<sub>20</sub>N<sub>2</sub>O: C, 79.72; H, 6.37; N, 8.85; O, 5.06; found: C, 79.74; H, 6.35; N, 8.86.

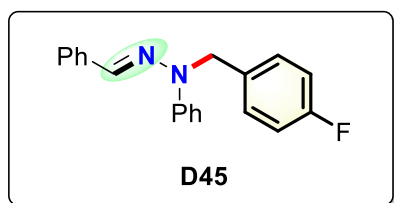

### 2-benzylidene-1-(4-fluorobenzyl)-1-phenylhydrazine (D45)

The title compound was prepared according to the general procedure and purified by column chromatography to give a yellow solid 146.1 mg, 96% yield. Purification by column chromatography on silica gel (pentane/ethyl ether = 20 : 1 – 5:1).

<sup>1</sup>H NMR (400 MHz, 23.0 °C, CDCl<sub>3</sub>) δ 7.64 – 7.53 (m, 2H), 7.37 (dd, *J* = 8.9, 1.1 Hz, 2H), 7.33 – 7.26 (m, 5H), 7.26 – 7.15 (m, 2H), 7.03 – 6.83 (m, 4H), 5.07 (s, 2H) ppm.

<sup>13</sup>C NMR (101 MHz, 23.0 °C, CDCl<sub>3</sub>) δ 164.75, 162.29, 147.80, 138.72, 138.65,

136.47, 132.78, 130.83, 130.74, 129.37, 128.70, 128.17, 126.38, 121.78, 121.75, 121.14, 114.97, 114.58, 114.37, 113.35, 113.13, 50.15, 50.13 ppm.

$^{19}\text{F}$  NMR (377 MHz, 23.0 °C,  $\text{CDCl}_3$ )  $\delta$  -111.83 ppm.

HRMS (ESI) calcd. for  $\text{C}_{20}\text{H}_{18}\text{FN}_2$  [M+H]: 305.1454, found: 305.1455.

Elemental Analysis calcd for  $\text{C}_{20}\text{H}_{17}\text{FN}_2$ : C, 78.92; H, 5.63; F, 6.24; N, 9.20; found: C, 78.94; H, 5.65; N, 9.24.

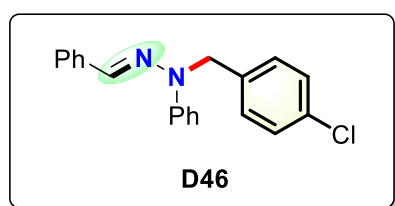

### 2-benzylidene-1-(4-chlorobenzyl)-1-phenylhydrazine (D46)

The title compound was prepared according to the general procedure and purified by column chromatography to give a yellow solid 150.8 mg, 94% yield. Purification by column chromatography on silica gel (pentane/ethyl ether = 20 : 1 – 5:1).

$^1\text{H}$  NMR (400 MHz, 23.0 °C,  $\text{CDCl}_3$ )  $\delta$  7.65 – 7.54 (m, 2H), 7.37 – 7.23 (m, 10H), 7.12 (d,  $J$  = 8.4 Hz, 2H), 6.94 (t,  $J$  = 7.1 Hz, 1H), 5.07 (s, 2H) ppm.

$^{13}\text{C}$  NMR (101 MHz, 23.0 °C,  $\text{CDCl}_3$ )  $\delta$  147.73, 136.40, 134.25, 133.16, 132.72, 129.34, 129.28, 129.15, 128.70, 128.66, 128.13, 127.58, 126.31, 121.09, 114.93, 49.92 ppm.

HRMS (ESI) calcd. for  $\text{C}_{20}\text{H}_{18}\text{ClN}_2$  [M+H]: 321.1159, found: 321.1155.

Elemental Analysis calcd for  $\text{C}_{20}\text{H}_{17}\text{ClN}_2$ : C, 74.88; H, 5.34; Cl, 11.05; N, 8.73; found: C, 74.87; H, 5.35; N, 8.74.

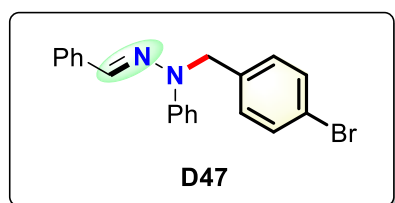

### 2-benzylidene-1-(4-bromobenzyl)-1-phenylhydrazine (D47)

The title compound was prepared according to the general procedure and purified by

column chromatography to give a yellow solid 164.4 mg, 90% yield. Purification by column chromatography on silica gel (pentane/ethyl ether = 20 : 1 – 5:1).

**<sup>1</sup>H NMR** (400 MHz, 23.0 °C, CDCl<sub>3</sub>) δ 7.59 (dd, *J* = 8.2, 1.1 Hz, 2H), 7.44 – 7.39 (m, 2H), 7.35 – 7.28 (m, 6H), 7.24 – 7.20 (m, 1H), 7.06 (d, *J* = 8.5 Hz, 2H), 6.97 – 6.91 (m, 1H), 5.04 (s, 2H) ppm.

**<sup>13</sup>C NMR** (101 MHz, 23.0 °C, CDCl<sub>3</sub>) δ 147.72, 136.39, 134.80, 132.74, 132.23, 129.35, 128.67, 128.15, 127.96, 126.33, 121.22, 121.11, 114.93, 49.98 ppm.

**HRMS** (ESI) calcd. for C<sub>20</sub>H<sub>18</sub>BrN<sub>2</sub> [M+H]: 365.0653, found: 365.0653.

**Elemental Analysis** calcd for C<sub>20</sub>H<sub>17</sub>BrN<sub>2</sub>: C, 65.76; H, 4.69; Br, 21.88; N, 7.67; found: C, 65.73; H, 4.64; N, 7.63.

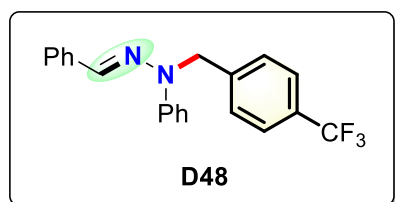

### **2-benzylidene-1-phenyl-1-(4-(trifluoromethyl)benzyl)hydrazine (D48)**

The title compound was prepared according to the general procedure and purified by column chromatography to give a yellow solid 166.6 mg, 94% yield. Purification by column chromatography on silica gel (pentane/ethyl ether = 20 : 1 – 5:1).

**<sup>1</sup>H NMR** (400 MHz, 23.0 °C, CDCl<sub>3</sub>) δ 7.64 – 7.55 (m, 4H), 7.38 – 7.27 (m, 9H), 7.27 – 7.21 (m, 1H), 6.96 (t, *J* = 7.1 Hz, 1H), 5.16 (s, 2H) ppm.

**<sup>13</sup>C NMR** (101 MHz, 23.0 °C, CDCl<sub>3</sub>) δ 147.66, 140.04, 140.03, 136.27, 132.78, 129.99, 129.67, 129.37, 128.67, 128.59, 128.22, 126.53, 126.33, 126.26, 126.16, 126.13, 126.09, 126.05, 125.52, 122.82, 121.23, 114.94, 50.15 ppm.

**<sup>19</sup>F NMR** (377 MHz, 23.0 °C, CDCl<sub>3</sub>) δ -62.35 ppm.

**HRMS** (ESI) calcd. for C<sub>21</sub>H<sub>18</sub>F<sub>3</sub>N<sub>2</sub> [M+H]: 355.1422, found: 355.1425.

**Elemental Analysis** calcd for C<sub>21</sub>H<sub>17</sub>F<sub>3</sub>N<sub>2</sub>: C, 71.18; H, 4.84; F, 16.08; N, 7.91; found: C, 71.16; H, 4.86; N, 7.93.

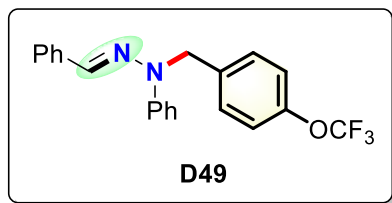

### 2-benzylidene-1-phenyl-1-(4-(trifluoromethoxy)benzyl)hydrazine (D49)

The title compound was prepared according to the general procedure and purified by column chromatography to give a yellow solid 159.3 mg, 86% yield. Purification by column chromatography on silica gel (pentane/ethyl ether = 20 : 1 – 5:1).

<sup>1</sup>H NMR (400 MHz, 23.0 °C, CDCl<sub>3</sub>) δ 7.63 (d, *J* = 7.3 Hz, 2H), 7.40 – 7.32 (m, 6H), 7.27 (d, *J* = 9.3 Hz, 4H), 7.19 (d, *J* = 8.3 Hz, 2H), 6.97 (t, *J* = 7.1 Hz, 1H), 5.18 (s, 2H) ppm.

<sup>13</sup>C NMR (101 MHz, 23.0 °C, CDCl<sub>3</sub>) δ 148.44, 147.63, 136.30, 134.37, 132.65, 129.26, 128.58, 128.08, 127.49, 126.24, 121.63, 121.06, 114.86, 53.44, 49.83 ppm.

<sup>19</sup>F NMR (377 MHz, 23.0 °C, CDCl<sub>3</sub>) δ -57.86 ppm.

HRMS (ESI) calcd. for C<sub>21</sub>H<sub>18</sub>F<sub>3</sub>N<sub>2</sub>O [M+H]: 371.1371, found: 371.1373.

Elemental Analysis calcd for C<sub>21</sub>H<sub>17</sub>F<sub>3</sub>N<sub>2</sub>O: C, 68.10; H, 4.63; F, 15.39; N, 7.56; O, 4.32; found: C, 68.15; H, 4.64; N, 7.53.

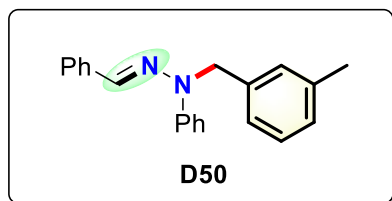

### 2-benzylidene-1-(3-methylbenzyl)-1-phenylhydrazine (D50)

The title compound was prepared according to the general procedure and purified by column chromatography to give a yellow solid 132.2 mg, 88% yield. Purification by column chromatography on silica gel (pentane/ethyl ether = 20 : 1 – 5:1).

<sup>1</sup>H NMR (400 MHz, 23.0 °C, CDCl<sub>3</sub>) δ 7.61 (d, *J* = 7.5 Hz, 2H), 7.40 (d, *J* = 8.0 Hz, 2H), 7.36 (s, 1H), 7.30 (t, *J* = 7.7 Hz, 4H), 7.24 – 7.16 (m, 2H), 7.03 (q, *J* = 8.1 Hz, 3H), 6.93 (t, *J* = 7.2 Hz, 1H), 5.10 (s, 2H), 2.29 (s, 3H) ppm.

$^{13}\text{C}$  NMR (101 MHz, 23.0 °C,  $\text{CDCl}_3$ )  $\delta$  148.17, 139.00, 136.83, 135.92, 132.65, 129.39, 129.14, 128.74, 128.32, 128.06, 126.77, 126.44, 123.32, 120.93, 115.02, 50.75, 21.73 ppm.

HRMS (ESI) calcd. for  $\text{C}_{21}\text{H}_{21}\text{N}_2$  [M+H]: 301.1705, found: 301.1705.

Elemental Analysis calcd for  $\text{C}_{21}\text{H}_{20}\text{N}_2$ : C, 83.96; H, 6.71; N, 9.33; found: C, 83.98; H, 6.75; N, 9.32.

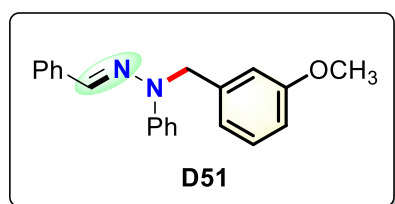

### 2-benzylidene-1-(3-methoxybenzyl)-1-phenylhydrazine (D51)

The title compound was prepared according to the general procedure and purified by column chromatography to give a yellow solid 144.1 mg, 91% yield. Purification by column chromatography on silica gel (pentane/ethyl ether = 20 : 1 – 5:1).

$^1\text{H}$  NMR (400 MHz, 23.0 °C,  $\text{CDCl}_3$ )  $\delta$  7.65 – 7.59 (m, 2H), 7.43 – 7.36 (m, 3H), 7.34 – 7.27 (m, 4H), 7.26 – 7.20 (m, 2H), 6.98 – 6.91 (m, 1H), 6.85 – 6.75 (m, 3H), 5.13 (s, 2H), 3.74 (s, 3H) ppm.

$^{13}\text{C}$  NMR (101 MHz, 23.0 °C,  $\text{CDCl}_3$ )  $\delta$  160.29, 147.95, 137.54, 136.57, 132.59, 130.16, 129.20, 128.56, 127.92, 126.26, 120.82, 118.30, 114.89, 112.58, 111.72, 55.27, 50.63 ppm.

HRMS (ESI) calcd. for  $\text{C}_{21}\text{H}_{21}\text{N}_2\text{O}$  [M+H]: 317.1654, found: 317.1653.

Elemental Analysis calcd for  $\text{C}_{21}\text{H}_{20}\text{N}_2\text{O}$ : C, 79.72; H, 6.37; N, 8.85; O, 5.06; found: C, 79.73; H, 6.34; N, 8.82.

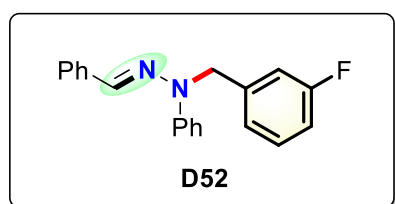

### 2-benzylidene-1-(3-fluorobenzyl)-1-phenylhydrazine (D52)

The title compound was prepared according to the general procedure and purified by column chromatography to give a yellow solid 140.2 mg, 92% yield. Purification by column chromatography on silica gel (pentane/ethyl ether = 20 : 1 – 5:1).

<sup>1</sup>H NMR (400 MHz, 23.0 °C, CDCl<sub>3</sub>) δ 8.28 (q, *J* = 6.8, 3.3 Hz, 1H), 8.07 (s, 1H), 7.96 – 7.89 (m, 1H), 7.83 (dd, *J* = 6.2, 3.4 Hz, 1H), 7.76 (d, *J* = 8.2 Hz, 1H), 7.49 – 7.44 (m, 4H), 7.38 – 7.32 (m, 5H), 6.98 (t, *J* = 7.3 Hz, 1H), 5.30 (s, 2H) ppm.

<sup>13</sup>C NMR (101 MHz, 23.0 °C, CDCl<sub>3</sub>) δ 164.65, 162.19, 147.69, 138.58, 138.52, 136.33, 132.68, 130.70, 130.62, 129.23, 128.56, 128.04, 126.24, 121.65, 121.62, 121.01, 114.87, 114.48, 114.27, 113.24, 113.02, 50.15 ppm.

<sup>19</sup>F NMR (377 MHz, 23.0 °C, CDCl<sub>3</sub>) δ -112.10 ppm.

HRMS (ESI) calcd. for C<sub>20</sub>H<sub>18</sub>FN<sub>2</sub> [M+H]: 305.1454, found: 305.1455.

Elemental Analysis calcd for C<sub>20</sub>H<sub>17</sub>FN<sub>2</sub>: C, 78.92; H, 5.63; F, 6.24; N, 9.20; found: C, 78.93; H, 5.65; N, 9.22.

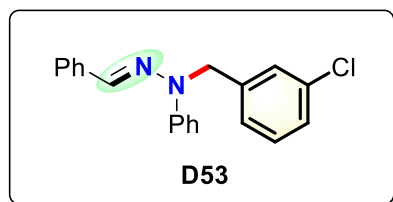

### 2-benzylidene-1-(3-chlorobenzyl)-1-phenylhydrazine (D53)

The title compound was prepared according to the general procedure and purified by column chromatography to give a yellow solid 146.1 mg, 91% yield. Purification by column chromatography on silica gel (pentane/ethyl ether = 20 : 1 – 5:1).

<sup>1</sup>H NMR (400 MHz, 23.0 °C, CDCl<sub>3</sub>) δ 7.61 (d, *J* = 7.7 Hz, 2H), 7.38 – 7.28 (m, 7H), 7.22 (t, *J* = 7.2 Hz, 4H), 7.09 – 7.03 (m, 1H), 6.95 (t, *J* = 7.1 Hz, 1H), 5.08 (s, 2H) ppm.

<sup>13</sup>C NMR (101 MHz, 23.0 °C, CDCl<sub>3</sub>) δ 147.74, 138.07, 136.39, 135.11, 132.75, 130.45, 129.34, 128.66, 128.15, 127.74, 126.35, 126.25, 124.30, 121.13, 114.94, 50.14 ppm.

HRMS (ESI) calcd. for C<sub>20</sub>H<sub>18</sub>ClN<sub>2</sub> [M+H]: 321.1159, found: 321.1155.

Elemental Analysis calcd for C<sub>20</sub>H<sub>17</sub>ClN<sub>2</sub>: C, 74.88; H, 5.34; Cl, 11.05; N, 8.73; found:



C, 74.85; H, 5.31; N, 8.73.

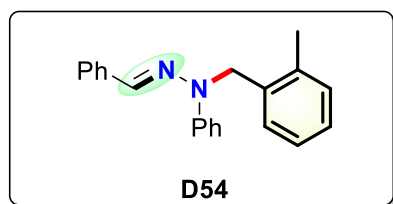

### 2-benzylidene-1-(2-methylbenzyl)-1-phenylhydrazine (D54)

The title compound was prepared according to the general procedure and purified by column chromatography to give a yellow solid 124.7 mg, 83% yield. Purification by column chromatography on silica gel (pentane/ethyl ether = 20 : 1 – 5:1).

**<sup>1</sup>H NMR** (400 MHz, 23.0 °C, CDCl<sub>3</sub>) δ 7.73 – 7.51 (m, 2H), 7.40 – 7.28 (m, 6H), 7.26 – 7.17 (m, 4H), 7.08 (t, *J* = 7.4 Hz, 1H), 7.01 – 6.84 (m, 2H), 5.06 (s, 2H), 2.44 (s, 3H) ppm.

**<sup>13</sup>C NMR** (101 MHz, 23.0 °C, CDCl<sub>3</sub>) δ 147.80, 136.56, 134.68, 132.62, 132.24, 130.54, 129.14, 128.53, 127.86, 127.26, 126.57, 126.22, 125.80, 125.60, 120.73, 114.77, 77.36, 77.05, 76.73, 49.02, 19.09, 0.03 ppm.

**HRMS** (ESI) calcd. for C<sub>21</sub>H<sub>21</sub>N<sub>2</sub> [M+H]: 301.1705, found: 301.1705.

**Elemental Analysis** calcd for C<sub>21</sub>H<sub>20</sub>N<sub>2</sub>: C, 83.96; H, 6.71; N, 9.33; found: C, 83.99; H, 6.76; N, 9.32.

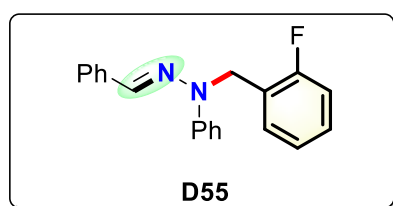

### 2-benzylidene-1-(2-fluorobenzyl)-1-phenylhydrazine (D55)

The title compound was prepared according to the general procedure and purified by column chromatography to give a yellow solid 124.7 mg, 83% yield. Purification by column chromatography on silica gel (pentane/ethyl ether = 20 : 1 – 5:1).

**<sup>1</sup>H NMR** (400 MHz, 23.0 °C, CDCl<sub>3</sub>) δ 7.68 – 7.55 (m, 2H), 7.37 (d, *J* = 7.9 Hz, 2H), 7.34 – 7.26 (m, 5H), 7.22 – 7.16 (m, 2H), 7.09 (dd, *J* = 10.6, 7.0 Hz, 1H), 7.01 – 6.90

(m, 3H), 5.15 (s, 2H) ppm.

$^{13}\text{C}$  NMR (101 MHz, 23.0 °C,  $\text{CDCl}_3$ )  $\delta$  161.79, 159.36, 147.74, 136.54, 132.61, 130.23, 129.39, 129.21, 129.13, 128.71, 128.59, 128.16, 128.09, 128.05, 127.93, 126.43, 124.76, 124.72, 122.53, 122.39, 121.08, 115.76, 115.56, 114.92, 44.45, 44.40 ppm.

$^{19}\text{F}$  NMR (377 MHz, 23.0 °C,  $\text{CDCl}_3$ )  $\delta$  -117.56 ppm.

HRMS (ESI) calcd. for  $\text{C}_{20}\text{H}_{18}\text{FN}_2$  [M+H]: 305.1454, found: 305.1455.

Elemental Analysis calcd for  $\text{C}_{20}\text{H}_{17}\text{FN}_2$ : C, 78.92; H, 5.63; F, 6.24; N, 9.20; found: C, 78.95; H, 5.67; N, 9.23.

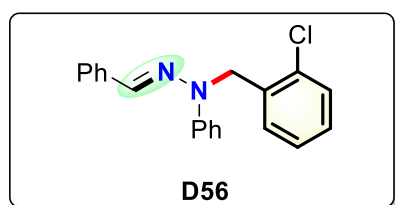

### 2-benzylidene-1-(2-chlorobenzyl)-1-phenylhydrazine (D56)

The title compound was prepared according to the general procedure and purified by column chromatography to give a yellow solid 138.1 mg, 86% yield. Purification by column chromatography on silica gel (pentane/ethyl ether = 20 : 1 – 5:1).

$^1\text{H}$  NMR (400 MHz, 23.0 °C,  $\text{CDCl}_3$ )  $\delta$  7.61 (d,  $J$  = 7.4 Hz, 2H), 7.43 (d,  $J$  = 7.4 Hz, 1H), 7.38 – 7.28 (m, 6H), 7.26 – 7.17 (m, 3H), 7.09 (t,  $J$  = 7.4 Hz, 1H), 7.04 – 6.97 (m, 1H), 6.94 (t,  $J$  = 7.1 Hz, 1H), 5.16 (s, 2H) ppm.

$^{13}\text{C}$  NMR (101 MHz, 23.0 °C,  $\text{CDCl}_3$ )  $\delta$  147.58, 136.43, 132.65, 132.58, 132.41, 129.89, 129.31, 128.81, 128.64, 128.11, 127.68, 127.43, 126.38, 121.01, 114.77, 48.59 ppm.

HRMS (ESI) calcd. for  $\text{C}_{20}\text{H}_{18}\text{ClN}_2$  [M+H]: 321.1159, found: 321.1155.

Elemental Analysis calcd for  $\text{C}_{20}\text{H}_{17}\text{ClN}_2$ : C, 74.88; H, 5.34; Cl, 11.05; N, 8.73; found: C, 74.89; H, 5.36; N, 8.71.

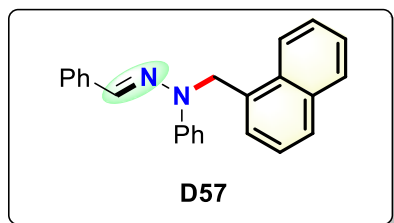

### 2-benzylidene-1-(naphthalen-1-ylmethyl)-1-phenylhydrazine (D57)

The title compound was prepared according to the general procedure and purified by column chromatography to give a yellow solid 136.3 mg, 81% yield. Purification by column chromatography on silica gel (pentane/ethyl ether = 20 : 1 – 5:1).

<sup>1</sup>H NMR (400 MHz, 23.0 °C, CDCl<sub>3</sub>) δ 8.27 (d, *J* = 8.3 Hz, 1H), 8.02 (d, *J* = 7.6 Hz, 1H), 7.84 (d, *J* = 8.2 Hz, 1H), 7.79 – 7.58 (m, 4H), 7.52 (s, 1H), 7.50 – 7.22 (m, 8H), 7.03 – 6.81 (m, 2H), 5.76 (s, 2H) ppm.

<sup>13</sup>C NMR (101 MHz, 23.0 °C, CDCl<sub>3</sub>) δ 147.52, 136.73, 134.15, 133.08, 130.81, 130.07, 129.67, 129.16, 129.09, 128.35, 127.88, 126.73, 126.54, 126.44, 126.01, 123.92, 122.74, 120.71, 114.60, 47.37, 40.62, 40.41, 40.21, 40.00, 39.79, 39.58, 39.37 ppm.

HRMS (ESI) calcd. for C<sub>24</sub>H<sub>21</sub>N<sub>2</sub> [M+H]: 337.1705, found: 337.1705.

Elemental Analysis calcd for C<sub>24</sub>H<sub>20</sub>N<sub>2</sub>: C, 85.68; H, 5.99; N, 8.33; found: C, 85.67; H, 5.95; N, 8.37.

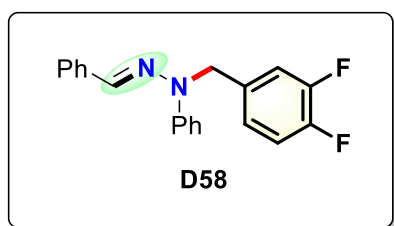

### 2-benzylidene-1-(3,4-difluorobenzyl)-1-phenylhydrazine (D58)

The title compound was prepared according to the general procedure and purified by column chromatography to give a yellow solid 148.3 mg, 92% yield. Purification by column chromatography on silica gel (pentane/ethyl ether = 20 : 1 – 5:1).

<sup>1</sup>H NMR (400 MHz, 23.0 °C, CDCl<sub>3</sub>) δ 7.71 – 7.53 (m, 2H), 7.41 – 7.27 (m, 7H), 7.27 – 7.19 (m, 1H), 7.13 – 6.90 (m, 4H), 5.06 (s, 2H) ppm.

$^{13}\text{C}$  NMR (101 MHz, 23.0 °C,  $\text{CDCl}_3$ )  $\delta$  152.19, 152.06, 150.94, 150.81, 149.71, 149.59, 148.48, 148.35, 147.60, 136.28, 132.85, 132.82, 129.38, 128.68, 128.24, 126.34, 122.11, 122.07, 122.05, 122.01, 121.26, 118.07, 117.90, 115.32, 115.15, 114.97, 49.62 ppm.

$^{19}\text{F}$  NMR (377 MHz, 23.0 °C,  $\text{CDCl}_3$ )  $\delta$  -136.32, -136.37, -139.38, -139.43 ppm.

HRMS (ESI) calcd. for  $\text{C}_{20}\text{H}_{17}\text{F}_2\text{N}_2$  [M+H]: 323.1360, found: 323.1359.

Elemental Analysis calcd for  $\text{C}_{20}\text{H}_{16}\text{F}_2\text{N}_2$ : C, 74.52; H, 5.00; F, 11.79; N, 8.69; found: C, 74.54; H, 5.05; N, 8.66.

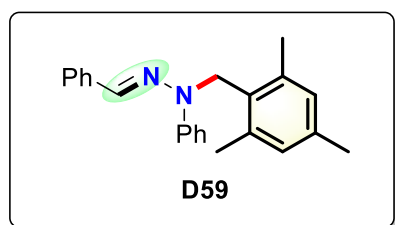

### 2-benzylidene-1-phenyl-1-(2,4,6-trimethylbenzyl)hydrazine (D59)

The title compound was prepared according to the general procedure and purified by column chromatography to give a yellow solid 124.8 mg, 76% yield. Purification by column chromatography on silica gel (pentane/ethyl ether = 20 : 1 – 5:1).

$^1\text{H}$  NMR (400 MHz, 23.0 °C,  $\text{CDCl}_3$ )  $\delta$  7.54 (d,  $J$  = 8.0 Hz, 2H), 7.25 (dd,  $J$  = 22.7, 15.4, 8.6 Hz, 8H), 7.06 – 6.95 (m, 1H), 6.80 (s, 2H), 4.90 (s, 2H), 2.23 (s, 9H) ppm.

$^{13}\text{C}$  NMR (101 MHz, 23.0 °C,  $\text{CDCl}_3$ )  $\delta$  147.41, 136.81, 136.78, 136.76, 133.69, 130.05, 129.91, 129.15, 128.57, 127.80, 126.17, 122.80, 119.77, 50.72, 20.95, 20.42 ppm.

HRMS (ESI) calcd. for  $\text{C}_{23}\text{H}_{25}\text{N}_2$  [M+H]: 329.2018, found: 329.2017.

Elemental Analysis calcd for  $\text{C}_{23}\text{H}_{24}\text{N}_2$ : C, 84.11; H, 7.37; N, 8.53; found: C, 84.12; H, 7.35; N, 8.56.

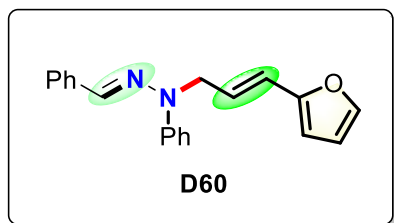

### 2-((*E*)-benzylidene)-1-((*E*)-3-(furan-2-yl)allyl)-1-phenylhydrazine (D60)

The title compound was prepared according to the general procedure and purified by column chromatography to give a yellow solid 110.4 mg, 73% yield. Purification by column chromatography on silica gel (pentane/ethyl ether = 20 : 1 – 5:1).

<sup>1</sup>H NMR (400 MHz, CDCl<sub>3</sub>) δ 7.74 – 7.64 (m, 2H), 7.44 (s, 1H), 7.42 – 7.28 (m, 7H), 7.27 – 7.18 (m, 1H), 6.98 – 6.90 (m, 1H), 6.33 – 6.26 (m, 1H), 6.24 – 6.17 (m, 2H), 6.12 – 6.06 (m, 1H), 4.68 – 4.58 (m, 2H).

<sup>13</sup>C NMR (101 MHz, CDCl<sub>3</sub>) δ 152.2, 147.6, 142.0, 136.6, 132.5, 129.2, 128.6, 128.0, 126.3, 120.8, 120.3, 119.6, 114.8, 111.4, 108.3, 48.1.

HRMS (ESI) calcd. for C<sub>20</sub>H<sub>19</sub>N<sub>2</sub>O [M+H]: 303.1491, found: 303.1486.

Elemental Analysis calcd for C<sub>20</sub>H<sub>18</sub>N<sub>2</sub>O: C, 79.44; H, 6.00; N, 9.26; found: C, 79.45; H, 6.04; N, 9.24.

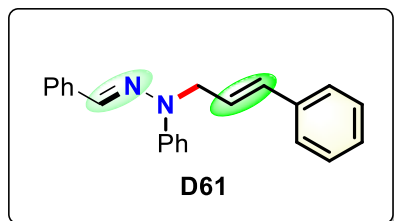

### 2-(benzylidene)-1-cinnamyl-1-phenylhydrazine (D61)

The title compound was prepared according to the general procedure and purified by column chromatography to give a yellow solid 126.5 mg, 81% yield. Purification by column chromatography on silica gel (pentane/ethyl ether = 20 : 1 – 5:1).

<sup>1</sup>H NMR (400 MHz, 23.0 °C, CDCl<sub>3</sub>) δ 7.72 – 7.61 (m, 2H), 7.48 (s, 1H), 7.45 – 7.39 (m, 2H), 7.37 – 7.29 (m, 6H), 7.28 – 7.18 (m, 4H), 6.94 (t, *J* = 7.2 Hz, 1H), 6.44 (d, *J* = 16.1 Hz, 1H), 6.32 – 6.17 (m, 1H), 4.66 (dd, *J* = 3.8, 1.7 Hz, 2H) ppm.

<sup>13</sup>C NMR (101 MHz, 23.0 °C, CDCl<sub>3</sub>) δ 147.67, 136.69, 136.43, 132.49, 131.38,

129.21, 128.65, 127.95, 127.78, 126.48, 126.28, 121.80, 120.77, 114.96, 48.54 ppm.

**HRMS** (ESI) calcd. for  $C_{22}H_{21}N_2$  [M+H]: 313.1705, found: 313.1704.

**Elemental Analysis** calcd for  $C_{22}H_{20}N_2$ : C, 84.58; H, 6.45; N, 8.97; found: C, 84.57; H, 6.44; N, 8.94.

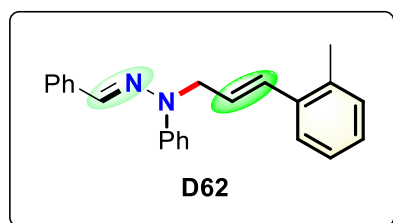

### 2-(benzylidene)-1-phenyl-1-3-(p-tolyl)allylhydrazine (D62)

The title compound was prepared according to the general procedure and purified by column chromatography to give a yellow solid 133.8 mg, 82% yield. Purification by column chromatography on silica gel (pentane/ethyl ether = 20 : 1 – 5:1).

**$^1H$  NMR** (400 MHz, 23.0 °C,  $CDCl_3$ )  $\delta$  7.80 – 7.58 (m, 1H), 7.44 – 7.37 (m, 1H), 7.37 – 7.27 (m, 3H), 7.26 – 7.16 (m, 3H), 7.05 (d,  $J$  = 7.9 Hz, 2H), 7.01 – 6.84 (m, 3H), 6.40 (d,  $J$  = 16.1 Hz, 1H), 6.27 – 6.06 (m, 1H), 4.63 (dd,  $J$  = 4.2, 2.0 Hz, 2H), 2.27 (s, 2H) ppm.

**$^{13}C$  NMR** (101 MHz, 23.0 °C,  $CDCl_3$ )  $\delta$  147.70, 137.63, 136.75, 133.67, 132.47, 131.27, 129.35, 129.22, 128.65, 127.93, 126.39, 126.29, 120.73, 120.71, 114.96, 48.56, 29.84, 21.28 ppm.

**HRMS** (ESI) calcd. for  $C_{23}H_{23}N_2$  [M+H]: 327.1861, found: 327.1863.

**Elemental Analysis** calcd for  $C_{23}H_{22}N_2$ : C, 84.63; H, 6.79; N, 8.58; found: C, 84.64; H, 6.78; N, 8.56.

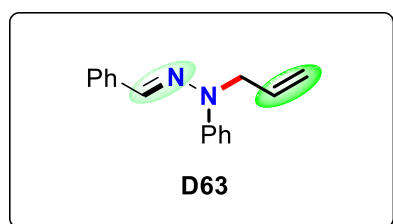

### 1-allyl-2-benzylidene-1-phenylhydrazine (D63)

The title compound was prepared according to the general procedure and purified by column chromatography to give a yellow solid 106.3 mg, 90% yield. Purification by column chromatography on silica gel (pentane/ethyl ether = 20 : 1 – 5:1).

$^1\text{H NMR}$  (400 MHz, 23.0 °C,  $\text{CDCl}_3$ )  $\delta$  7.68 (d,  $J = 7.4$  Hz, 2H), 7.42 (s, 1H), 7.39 – 7.23 (m, 8H), 6.93 (t,  $J = 7.1$  Hz, 1H), 5.24 – 5.11 (m, 2H), 4.55 – 4.52 (m, 2H) ppm.

$^{13}\text{C NMR}$  (101 MHz, 23.0 °C,  $\text{CDCl}_3$ )  $\delta$  147.61, 136.71, 132.28, 129.98, 129.07, 128.58, 127.83, 126.16, 120.60, 116.93, 114.80, 48.77 ppm.

**HRMS** (ESI) calcd. for  $\text{C}_{16}\text{H}_{17}\text{N}_2$  [M+H]: 237.1392, found: 237.1391.

**Elemental Analysis** calcd for  $\text{C}_{16}\text{H}_{16}\text{N}_2$ : C, 81.32; H, 6.82; N, 11.85; found: C, 81.34; H, 6.83; N, 11.84.

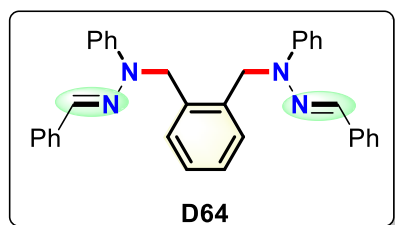

#### 1,2-bis((2-(benzylidene)-1-phenylhydrazine)methyl)benzene (D64)

The title compound was prepared according to the general procedure and purified by column chromatography to give a yellow solid 183.1 mg, 74% yield. Purification by column chromatography on silica gel (pentane/ethyl ether = 20 : 1 – 5:1).

$^1\text{H NMR}$  (400 MHz, 23.0 °C,  $\text{CDCl}_3$ )  $\delta$  7.63 (d,  $J = 7.8$  Hz, 4H), 7.41 (d,  $J = 8.6$  Hz, 4H), 7.38 – 7.30 (m, 10H), 7.25 (dd,  $J = 14.8, 7.7$  Hz, 3H), 7.16 (q,  $J = 12.7, 9.1, 4.0$  Hz, 4H), 6.99 (t,  $J = 7.1$  Hz, 2H), 5.16 (s, 4H) ppm.

$^{13}\text{C NMR}$  (101 MHz, 23.0 °C,  $\text{CDCl}_3$ )  $\delta$  147.65, 136.29, 132.67, 131.66, 129.34, 128.66, 128.16, 128.13, 126.79, 126.32, 121.34, 115.31, 48.60 ppm.

**HRMS** (ESI) calcd. for  $\text{C}_{34}\text{H}_{31}\text{N}_4$  [M+H]: 495.2549, found: 495.2548.

**Elemental Analysis** calcd for  $\text{C}_{34}\text{H}_{30}\text{N}_4$ : C, 82.56; H, 6.11; N, 11.33; found: C, 82.55; H, 6.12; N, 11.34.

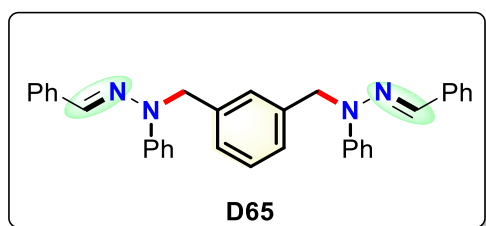

### 1,3-bis((2-(benzylidene)-1-phenylhydrazine)methyl)benzene (D65)

The title compound was prepared according to the general procedure and purified by column chromatography to give a yellow solid 188.1 mg, 76% yield. Purification by column chromatography on silica gel (pentane/ethyl ether = 20 : 1 – 5:1).

<sup>1</sup>H NMR (400 MHz, 23.0 °C, CDCl<sub>3</sub>) δ 7.58 – 7.52 (m, 4H), 7.40 (d, *J* = 7.8 Hz, 4H), 7.33 – 7.22 (m, 14H), 7.15 – 7.11 (m, 3H), 6.95 (t, *J* = 7.2 Hz, 2H), 5.12 (s, 4H) ppm.

<sup>13</sup>C NMR (101 MHz, 23.0 °C, CDCl<sub>3</sub>) δ 147.88, 136.80, 136.44, 132.67, 129.90, 129.25, 128.58, 127.94, 126.23, 125.22, 123.79, 120.89, 114.90, 50.45 ppm.

HRMS (ESI) calcd. for C<sub>34</sub>H<sub>31</sub>N<sub>4</sub> [M+H]: 495.2549, found: 495.2547.

Elemental Analysis calcd for C<sub>34</sub>H<sub>30</sub>N<sub>4</sub>: C, 82.56; H, 6.11; N, 11.33; found: C, 82.56; H, 6.11; N, 11.33.

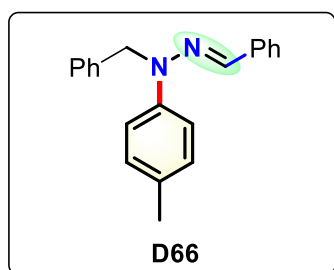

### 1-benzyl-2-benzylidene-1-(p-tolyl)hydrazine (D66)

The title compound was prepared according to the general procedure and purified by column chromatography to give a yellow solid 129.2 mg, 86% yield. Purification by column chromatography on silica gel (pentane/ethyl ether = 20 : 1 – 5:1).

<sup>1</sup>H NMR (400 MHz, 23.0 °C, CDCl<sub>3</sub>) δ 7.60 (d, *J* = 7.3 Hz, 2H), 7.34 – 7.27 (m, 7H), 7.23 (dd, *J* = 12.7, 7.1 Hz, 4H), 7.11 (d, *J* = 8.4 Hz, 2H), 5.13 (s, 2H), 2.30 (s, 3H) ppm.

<sup>13</sup>C NMR (101 MHz, 23.0 °C, CDCl<sub>3</sub>) δ 163.3, 160.0, 141.5, 141.5, 127.1, 127.0, 115.4, 115.2, 69.8, 25.3 ppm.

HRMS (ESI) calcd. for C<sub>21</sub>H<sub>21</sub>N<sub>2</sub> [M+H]: 301.1705, found: 301.1708.



**Elemental Analysis** calcd for C<sub>21</sub>H<sub>20</sub>N<sub>2</sub>: C, 83.96; H, 6.71; N, 9.33; found: C, 83.95; H, 6.73; N, 9.32.

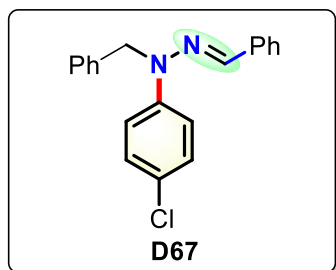

### 1-benzyl-2-benzylidene-1-(4-chlorophenyl)hydrazine (D67)

The title compound was prepared according to the general procedure and purified by column chromatography to give a yellow solid 147.6 mg, 92% yield. Purification by column chromatography on silica gel (pentane/ethyl ether = 20 : 1 – 5:1).

<sup>1</sup>H NMR (400 MHz, 23.0 °C, CDCl<sub>3</sub>) δ 7.59 (s, 1H), 7.57 (s, 1H), 7.36 (s, 1H), 7.31 (q, *J* = 9.2, 8.1, 3.7 Hz, 6H), 7.26 – 7.20 (m, 4H), 7.17 (d, *J* = 7.2 Hz, 2H), 5.11 (s, 2H) ppm.

<sup>13</sup>C NMR (101 MHz, 23.0 °C, CDCl<sub>3</sub>) δ 146.67, 136.45, 135.44, 133.45, 129.36, 129.28, 128.83, 128.41, 127.72, 126.54, 126.20, 125.85, 116.06, 50.52 ppm.

HRMS (ESI) calcd. for C<sub>20</sub>H<sub>18</sub>ClN<sub>2</sub> [M+H]: 321.1159, found: 321.1155.

**Elemental Analysis** calcd for C<sub>20</sub>H<sub>17</sub>ClN<sub>2</sub>: C, 74.88; H, 5.34; Cl, 11.05; N, 8.73; found: C, 74.87; H, 5.36; N, 8.71.

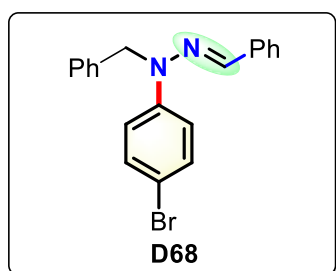

### 1-benzyl-2-benzylidene-1-(4-bromophenyl)hydrazine (D68)

The title compound was prepared according to the general procedure and purified by column chromatography to give a yellow solid 153.4 mg, 84% yield. Purification by column chromatography on silica gel (pentane/ethyl ether = 20 : 1 – 5:1).

**<sup>1</sup>H NMR** (400 MHz, 23.0 °C, CDCl<sub>3</sub>) δ 7.60 (d, *J* = 7.5 Hz, 2H), 7.38 (d, *J* = 6.1 Hz, 3H), 7.33 (t, *J* = 7.1 Hz, 4H), 7.29 – 7.22 (m, 4H), 7.19 (d, *J* = 7.4 Hz, 2H), 5.13 (s, 2H) ppm.

**<sup>13</sup>C NMR** (101 MHz, 23.0 °C, CDCl<sub>3</sub>) δ 146.87, 136.18, 135.15, 133.35, 131.96, 129.13, 128.60, 128.22, 127.50, 126.33, 125.97, 116.26, 113.01, 50.18 ppm.

**HRMS** (ESI) calcd. for C<sub>20</sub>H<sub>18</sub>BrN<sub>2</sub> [M+H]: 365.0653, found: 365.0653.

**Elemental Analysis** calcd for C<sub>20</sub>H<sub>17</sub>BrN<sub>2</sub>: C, 65.76; H, 4.69; Br, 21.88; N, 7.67; found: C, 65.74; H, 4.65; N, 7.63.

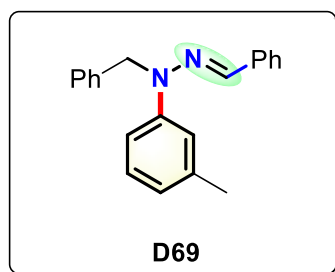

### **1-benzyl-2-benzylidene-1-(m-tolyl)hydrazine (D69)**

The title compound was prepared according to the general procedure and purified by column chromatography to give a yellow solid 120.2 mg, 80% yield. Purification by column chromatography on silica gel (pentane/ethyl ether = 20 : 1 – 5:1).

**<sup>1</sup>H NMR** (400 MHz, 23.0 °C, CDCl<sub>3</sub>) δ 7.61 (d, *J* = 1.2 Hz, 1H), 7.59 (s, 1H), 7.34 (s, 1H), 7.31 (q, *J* = 7.7, 3.7 Hz, 4H), 7.22 (dd, *J* = 11.0, 3.7 Hz, 5H), 7.20 – 7.17 (m, 2H), 6.78 – 6.75 (m, 1H), 5.14 (s, 2H), 2.35 (s, 3H) ppm.

**<sup>13</sup>C NMR** (101 MHz, 23.0 °C, CDCl<sub>3</sub>) δ 147.93, 138.97, 136.59, 135.77, 132.36, 128.99, 128.49, 127.78, 127.24, 126.16, 126.04, 121.69, 115.51, 112.05, 50.57, 21.87 ppm.

**HRMS** (ESI) calcd. for C<sub>21</sub>H<sub>21</sub>N<sub>2</sub> [M+H]: 301.1705, found: 301.1705.

**Elemental Analysis** calcd for C<sub>21</sub>H<sub>20</sub>N<sub>2</sub>: C, 83.96; H, 6.71; N, 9.33; found: C, 83.94; H, 6.70; N, 9.31.

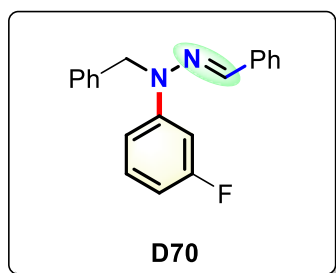

### 1-benzyl-2-benzylidene-1-(3-fluorophenyl)hydrazine (D70)

The title compound was prepared according to the general procedure and purified by column chromatography to give a yellow solid 132.4 mg, 87% yield. Purification by column chromatography on silica gel (pentane/ethyl ether = 20 : 1 – 5:1).

$^1\text{H NMR}$  (400 MHz, 23.0 °C,  $\text{CDCl}_3$ )  $\delta$  7.62 (d,  $J = 7.5$  Hz, 2H), 7.41 (s, 1H), 7.33 (t,  $J = 7.1$  Hz, 4H), 7.22 (t,  $J = 11.5$  Hz, 6H), 7.04 (d,  $J = 8.3$  Hz, 1H), 6.62 (t,  $J = 8.0$  Hz, 1H), 5.15 (s, 2H) ppm.

$^{13}\text{C NMR}$  (101 MHz, 23.0 °C,  $\text{CDCl}_3$ )  $\delta$  165.13, 162.71, 149.58, 149.48, 136.12, 135.19, 133.60, 130.29, 130.19, 129.13, 128.61, 128.30, 127.49, 126.41, 125.97, 109.75, 109.73, 107.27, 107.05, 102.30, 102.03, 50.24 ppm.

$^{19}\text{F NMR}$  (377 MHz, 23.0 °C,  $\text{CDCl}_3$ )  $\delta$  -112.11 ppm.

**HRMS** (ESI) calcd. for  $\text{C}_{20}\text{H}_{18}\text{FN}_2$  [ $\text{M}+\text{H}$ ]: 305.1454, found: 305.1455.

**Elemental Analysis** calcd for  $\text{C}_{20}\text{H}_{17}\text{FN}_2$ : C, 78.92; H, 5.63; F, 6.24; N, 9.20; found: C, 78.90; H, 5.61; N, 9.24.

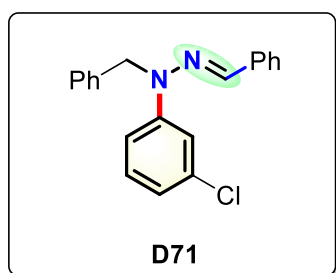

### 1-benzyl-2-benzylidene-1-(3-chlorophenyl)hydrazine (D71)

The title compound was prepared according to the general procedure and purified by column chromatography to give a yellow solid 131.5 mg, 82% yield. Purification by column chromatography on silica gel (pentane/ethyl ether = 20 : 1 – 5:1).

$^1\text{H NMR}$  (400 MHz, 23.0 °C,  $\text{CDCl}_3$ )  $\delta$  7.66 (dd,  $J = 8.0, 1.3$  Hz, 1H), 7.55 – 7.51 (m,

2H), 7.41 (d,  $J = 7.3$  Hz, 2H), 7.35 – 7.27 (m, 6H), 7.25 – 7.21 (m, 2H), 7.18 (s, 1H), 7.10 (t,  $J = 7.9, 1.6$  Hz, 1H), 4.95 (s, 2H) ppm.

$^{13}\text{C}$  NMR (101 MHz, 23.0 °C,  $\text{CDCl}_3$ )  $\delta$  148.91, 136.08, 135.13, 135.10, 133.81, 130.13, 129.16, 128.62, 128.33, 127.52, 126.44, 125.96, 120.52, 114.85, 112.53, 50.23 ppm.

HRMS (ESI) calcd. for  $\text{C}_{20}\text{H}_{18}\text{ClN}_2$  [M+H]: 321.1159, found: 321.1155.

Elemental Analysis calcd for  $\text{C}_{20}\text{H}_{17}\text{ClN}_2$ : C, 74.88; H, 5.34; Cl, 11.05; N, 8.73; found: C, 74.84; H, 5.35; N, 8.74.

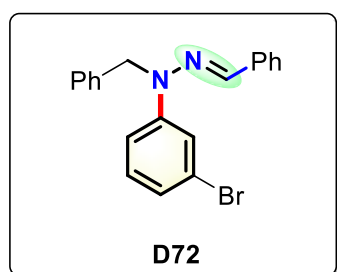

### 1-benzyl-2-benzylidene-1-(3-bromophenyl)hydrazine (D72)

The title compound was prepared according to the general procedure and purified by column chromatography to give a yellow solid 135.1 mg, 74% yield. Purification by column chromatography on silica gel (pentane/ethyl ether = 20 : 1 – 5:1).

$^1\text{H}$  NMR (400 MHz, 23.0 °C,  $\text{CDCl}_3$ )  $\delta$  7.63 (t,  $J = 2.0$  Hz, 1H), 7.61 (s, 1H), 7.59 (s, 1H), 7.39 (s, 1H), 7.33 (t,  $J = 7.3$  Hz, 4H), 7.28 – 7.18 (m, 5H), 7.13 (t,  $J = 8.0$  Hz, 1H), 7.04 (d,  $J = 8.2$  Hz, 1H), 5.11 (s, 2H) ppm.

$^{13}\text{C}$  NMR (101 MHz, 23.0 °C,  $\text{CDCl}_3$ )  $\delta$  149.02, 136.07, 135.08, 133.90, 130.43, 129.18, 128.63, 128.36, 127.54, 126.45, 125.97, 123.46, 123.36, 117.73, 113.01, 50.23 ppm.

HRMS (ESI) calcd. for  $\text{C}_{20}\text{H}_{18}\text{BrN}_2$  [M+H]: 365.0653, found: 365.0653.

Elemental Analysis calcd for  $\text{C}_{20}\text{H}_{17}\text{BrN}_2$ : C, 65.76; H, 4.69; Br, 21.88; N, 7.67; found: C, 65.74; H, 4.64; N, 7.64.

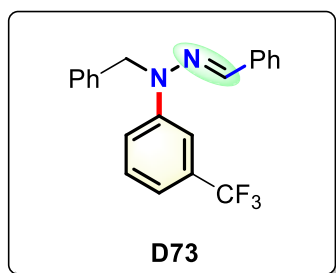

### 1-benzyl-2-benzylidene-1-(3-(trifluoromethyl)phenyl)hydrazine (D73)

The title compound was prepared according to the general procedure and purified by column chromatography to give a yellow solid 148.8 mg, 84% yield. Purification by column chromatography on silica gel (pentane/ethyl ether = 20 : 1 – 5:1).

<sup>1</sup>H NMR (400 MHz, 23.0 °C, CDCl<sub>3</sub>) δ 7.73 (s, 1H), 7.63 (d, *J* = 1.4 Hz, 1H), 7.61 (s, 1H), 7.45 (d, *J* = 9.5 Hz, 2H), 7.36 (t, *J* = 14.7, 7.7 Hz, 5H), 7.30 – 7.24 (m, 2H), 7.23 – 7.15 (m, 3H), 5.18 (s, 2H) ppm.

<sup>13</sup>C NMR (101 MHz, 23.0 °C, CDCl<sub>3</sub>) δ 148.10, 135.97, 134.97, 134.17, 132.09, 131.77, 131.45, 131.14, 129.66, 129.21, 128.65, 128.45, 127.60, 126.47, 125.94, 125.71, 123.00, 117.32, 117.31, 117.07, 117.03, 116.99, 116.95, 111.44, 111.40, 111.36, 111.32, 50.22 ppm.

<sup>19</sup>F NMR (377 MHz, 23.0 °C, CDCl<sub>3</sub>) δ -62.54 ppm.

HRMS (ESI) calcd. for C<sub>21</sub>H<sub>18</sub>F<sub>3</sub>N<sub>2</sub> [M+H]: 355.1422, found: 355.1425.

Elemental Analysis calcd for C<sub>21</sub>H<sub>17</sub>F<sub>3</sub>N<sub>2</sub>: C, 71.18; H, 4.84; F, 16.08; N, 7.91; found: C, 71.14; H, 4.86; N, 7.91.

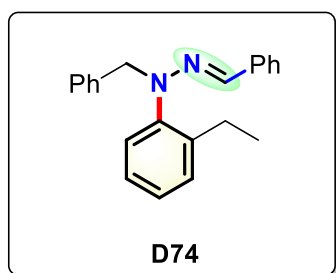

### 1-benzyl-2-benzylidene-1-(2-ethylphenyl)hydrazine (D74)

The title compound was prepared according to the general procedure and purified by column chromatography to give a yellow solid 113.2 mg, 72% yield. Purification by column chromatography on silica gel (pentane/ethyl ether = 20 : 1 – 5:1).

**<sup>1</sup>H NMR** (400 MHz, 23.0 °C, CDCl<sub>3</sub>) δ 7.50 – 7.45 (m, 2H), 7.35 (d, *J* = 7.2 Hz, 2H), 7.32 – 7.23 (m, 6H), 7.22 (s, 1H), 7.18 (dd, *J* = 10.2, 4.9, 2.1 Hz, 2H), 7.01 (dd, *J* = 7.5, 1.6 Hz, 1H), 6.93 (s, 1H), 4.86 (s, 2H), 2.58 (q, *J* = 7.6 Hz, 2H), 1.13 (t, *J* = 7.6 Hz, 3H) ppm.

**<sup>13</sup>C NMR** (101 MHz, 23.0 °C, CDCl<sub>3</sub>) δ 144.14, 141.97, 138.07, 136.77, 133.41, 129.37, 128.43, 128.39, 128.32, 127.35, 127.22, 127.16, 127.11, 126.72, 125.73, 60.53, 24.22, 14.83 ppm.

**HRMS** (ESI) calcd. for C<sub>22</sub>H<sub>23</sub>N<sub>2</sub> [M+H]: 315.1861, found: 315.1864.

**Elemental Analysis** calcd for C<sub>22</sub>H<sub>22</sub>N<sub>2</sub>: C, 84.04; H, 7.05; N, 8.91; found: C, 84.02; H, 7.03; N, 8.90.

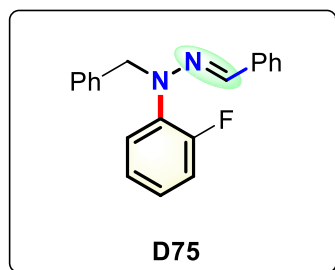

### **1-benzyl-2-benzylidene-1-(2-fluorophenyl)hydrazine (D75)**

The title compound was prepared according to the general procedure and purified by column chromatography to give a yellow solid 121.7 mg, 80% yield. Purification by column chromatography on silica gel (pentane/ethyl ether = 20 : 1 – 5:1).

**<sup>1</sup>H NMR** (400 MHz, 23.0 °C, CDCl<sub>3</sub>) δ 7.56 – 7.49 (m, 3H), 7.31 (dd, *J* = 15.6, 7.5, 5.7 Hz, 7H), 7.26 – 7.19 (m, 2H), 7.16 – 7.10 (m, 1H), 7.10 – 7.04 (m, 2H), 5.02 (s, 2H) ppm.

**<sup>13</sup>C NMR** (101 MHz, 23.0 °C, CDCl<sub>3</sub>) δ 155.81, 153.36, 136.83, 136.46, 136.38, 136.24, 134.80, 128.71, 128.51, 127.99, 127.17, 126.66, 126.16, 124.82, 124.75, 124.70, 124.68, 124.63, 124.60, 116.73, 116.52, 56.48 ppm.

**<sup>19</sup>F NMR** (377 MHz, 23.0 °C, CDCl<sub>3</sub>) δ -122.78 ppm.

**HRMS** (ESI) calcd. for C<sub>20</sub>H<sub>18</sub>FN<sub>2</sub> [M+H]: 305.1454, found: 305.1455.

**Elemental Analysis** calcd for C<sub>20</sub>H<sub>17</sub>FN<sub>2</sub>: C, 78.92; H, 5.63; F, 6.24; N, 9.20; found: C, 78.91; H, 5.61; N, 9.22.

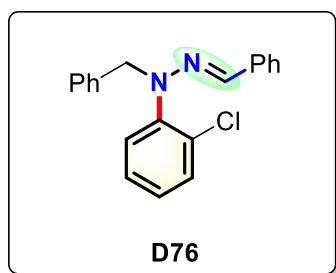

### 1-benzyl-2-benzylidene-1-(2-chlorophenyl)hydrazine (D76)

The title compound was prepared according to the general procedure and purified by column chromatography to give a yellow solid 117.1 mg, 73% yield. Purification by column chromatography on silica gel (pentane/ethyl ether = 20 : 1 – 5:1).

$^1\text{H NMR}$  (400 MHz, 23.0 °C,  $\text{CDCl}_3$ )  $\delta$  7.51 (d,  $J = 7.2$  Hz, 2H), 7.42 (dd,  $J = 8.0, 1.3$  Hz, 1H), 7.38 (d,  $J = 7.4$  Hz, 2H), 7.33 – 7.17 (m, 9H), 7.12 (t,  $J = 7.9, 1.8$  Hz, 1H), 4.94 (s, 2H) ppm.

$^{13}\text{C NMR}$  (101 MHz, 23.0 °C,  $\text{CDCl}_3$ )  $\delta$  144.74, 137.18, 136.27, 135.50, 130.71, 130.09, 128.52, 128.50, 127.95, 127.84, 127.69, 127.55, 127.18, 126.86, 126.12, 58.27 ppm.

**HRMS** (ESI) calcd. for  $\text{C}_{20}\text{H}_{18}\text{ClN}_2$  [ $\text{M}+\text{H}$ ]: 321.1159, found: 321.1155.

**Elemental Analysis** calcd for  $\text{C}_{20}\text{H}_{17}\text{ClN}_2$ : C, 74.88; H, 5.34; Cl, 11.05; N, 8.73; found: C, 74.87; H, 5.37; N, 8.72.

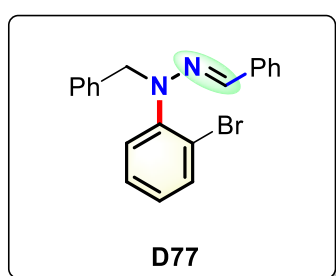

### 1-benzyl-2-benzylidene-1-(2-bromophenyl)hydrazine (D77)

The title compound was prepared according to the general procedure and purified by column chromatography to give a yellow solid 122.4 mg, 67% yield. Purification by column chromatography on silica gel (pentane/ethyl ether = 20 : 1 – 5:1).

$^1\text{H NMR}$  (400 MHz, 23.0 °C,  $\text{CDCl}_3$ )  $\delta$  7.65 (dd,  $J = 8.0, 1.3$  Hz, 1H), 7.55 – 7.49 (m, 2H), 7.40 (d,  $J = 7.3$  Hz, 2H), 7.32 – 7.19 (m, 8H), 7.16 (s, 1H), 7.09 (t,  $J = 7.9, 1.6$  Hz,

<sup>1</sup>H), 4.94 (s, 2H) ppm.

<sup>13</sup>C NMR (101 MHz, 23.0 °C, CDCl<sub>3</sub>) δ 145.69, 137.19, 136.24, 135.47, 133.87, 128.45, 128.44, 128.41, 128.35, 127.87, 127.55, 127.15, 126.05, 121.11, 58.77 ppm.

HRMS (ESI) calcd. for C<sub>20</sub>H<sub>18</sub>BrN<sub>2</sub> [M+H]: 365.0653, found: 365.0653.

Elemental Analysis calcd for C<sub>20</sub>H<sub>17</sub>BrN<sub>2</sub>: C, 65.76; H, 4.69; Br, 21.88; N, 7.67; found: C, 65.72; H, 4.64; N, 7.63.

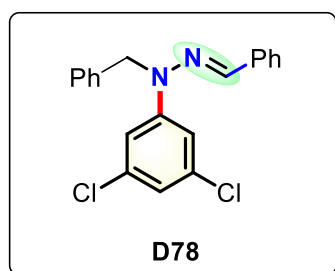

#### 1-benzyl-2-benzylidene-1-(3,5-dichlorophenyl)hydrazine (D78)

The title compound was prepared according to the general procedure and purified by column chromatography to give a yellow solid 152.8 mg, 86% yield. Purification by column chromatography on silica gel (pentane/ethyl ether = 20 : 1 – 5:1).

<sup>1</sup>H NMR (400 MHz, 23.0 °C, CDCl<sub>3</sub>) δ 7.58 (d, *J* = 7.2 Hz, 2H), 7.39 (s, 1H), 7.31 (t, *J* = 7.4 Hz, 4H), 7.28 – 7.22 (m, 4H), 7.14 (t, *J* = 6.8 Hz, 2H), 6.87 (t, *J* = 1.6 Hz, 1H), 5.04 (s, 2H) ppm.

<sup>13</sup>C NMR (101 MHz, 23.0 °C, CDCl<sub>3</sub>) δ 149.36, 135.66, 135.60, 135.08, 134.54, 129.33, 128.80, 128.73, 127.77, 126.69, 125.91, 120.21, 112.84, 50.04 ppm.

HRMS (ESI) calcd. for C<sub>20</sub>H<sub>17</sub>Cl<sub>2</sub>N<sub>2</sub> [M+H]: 355.0769, found: 355.0767.

Elemental Analysis calcd for C<sub>20</sub>H<sub>16</sub>Cl<sub>2</sub>N<sub>2</sub>: C, 67.62; H, 4.54; Cl, 19.96; N, 7.89; found: C, 67.63; H, 4.55; N, 7.84.

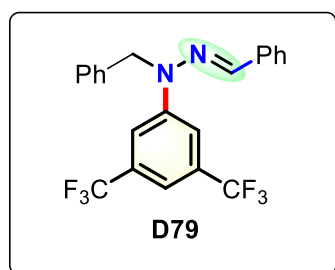



### 1-benzyl-2-benzylidene-1-(3,5-bis(trifluoromethyl)phenyl)hydrazine (D79)

The title compound was prepared according to the general procedure and purified by column chromatography to give a yellow solid 192.2 mg, 91% yield. Purification by column chromatography on silica gel (pentane/ethyl ether = 20 : 1 – 5:1).

$^1\text{H NMR}$  (400 MHz, 23.0 °C,  $\text{CDCl}_3$ )  $\delta$  7.78 (s, 2H), 7.65 – 7.60 (m, 2H), 7.52 (s, 1H), 7.40 (s, 1H), 7.38 (s, 1H), 7.35 (d,  $J = 7.7$  Hz, 3H), 7.33 – 7.27 (m, 2H), 7.20 (d,  $J = 7.2$  Hz, 2H), 5.20 (s, 2H) ppm.

$^{13}\text{C NMR}$  (101 MHz, 23.0 °C,  $\text{CDCl}_3$ )  $\delta$  148.60, 136.00, 135.35, 134.14, 133.00, 132.67, 132.34, 132.02, 129.39, 129.03, 128.76, 127.90, 127.65, 126.72, 125.81, 124.94, 122.23, 119.52, 113.87, 113.84, 113.50, 113.46, 113.42, 113.38, 113.35, 50.03 ppm.

$^{19}\text{F NMR}$  (377 MHz, 23.0 °C,  $\text{CDCl}_3$ )  $\delta$  -62.88 ppm.

**HRMS** (ESI) calcd. for  $\text{C}_{22}\text{H}_{17}\text{F}_6\text{N}_2$  [ $\text{M}+\text{H}$ ]: 423.1296, found: 423.1299.

**Elemental Analysis** calcd for  $\text{C}_{22}\text{H}_{16}\text{F}_6\text{N}_2$ : C, 62.56; H, 3.82; F, 26.99; N, 6.63; found: C, 62.53; H, 3.83; N, 6.65.

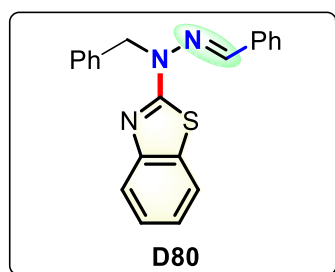

### 2-(1-benzyl-2-benzylidenehydrazineyl)benzo[d]thiazole (D80)

The title compound was prepared according to the general procedure and purified by column chromatography to give a yellow solid 138.9 mg, 81% yield. Purification by column chromatography on silica gel (pentane/ethyl ether = 20 : 1 – 5:1).

$^1\text{H NMR}$  (400 MHz, 23.0 °C,  $\text{CDCl}_3$ )  $\delta$  7.70 (d,  $J = 7.7$  Hz, 1H), 7.67 – 7.56 (m, 4H), 7.38 – 7.21 (m, 10H), 7.16 (t,  $J = 7.9$  Hz, 1H), 5.59 (s, 2H) ppm.

$^{13}\text{C NMR}$  (101 MHz, 23.0 °C,  $\text{CDCl}_3$ )  $\delta$  169.69, 152.22, 138.19, 134.49, 132.79, 129.50, 129.07, 128.71, 127.63, 126.94, 126.49, 125.82, 122.38, 120.97, 120.42, 49.25 ppm.

**HRMS** (ESI) calcd. for C<sub>21</sub>H<sub>18</sub>N<sub>3</sub>S [M+H]: 344.1221, found: 344.1223.

**Elemental Analysis** calcd for C<sub>21</sub>H<sub>17</sub>N<sub>3</sub>S: C, 73.44; H, 4.99; N, 12.24; S, 9.33; found: C, 73.45; H, 4.96; N, 12.22.

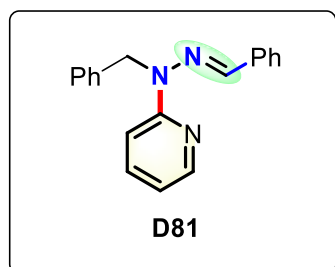

### 2-(1-benzyl-2-benzylidenehydrazineyl)pyridine (D81)

The title compound was prepared according to the general procedure and purified by column chromatography to give a yellow solid 133.6 mg, 93% yield. Purification by column chromatography on silica gel (pentane/ethyl ether = 20 : 1 – 5:1).

<sup>1</sup>H NMR (400 MHz, 23.0 °C, CDCl<sub>3</sub>) δ 8.21 (dd, *J* = 5.4, 1.2 Hz, 1H), 7.84 (d, *J* = 8.6 Hz, 1H), 7.68 – 7.58 (m, 3H), 7.52 (s, 1H), 7.36 – 7.17 (m, 8H), 6.80 (t, *J* = 7.0, 5.0, 0.8 Hz, 1H), 5.62 (s, 2H) ppm.

<sup>13</sup>C NMR (101 MHz, 23.0 °C, CDCl<sub>3</sub>) δ 157.87, 147.32, 137.69, 136.38, 136.10, 135.09, 128.84, 128.58, 128.38, 126.99, 126.43, 126.35, 115.89, 109.68, 46.14 ppm.

**HRMS** (ESI) calcd. for C<sub>19</sub>H<sub>18</sub>N<sub>3</sub> [M+H]: 288.1501, found: 288.1501.

**Elemental Analysis** calcd for C<sub>19</sub>H<sub>17</sub>N<sub>3</sub>: C, 79.41; H, 5.96; N, 14.62; found: C, 79.44; H, 5.94; N, 14.61.

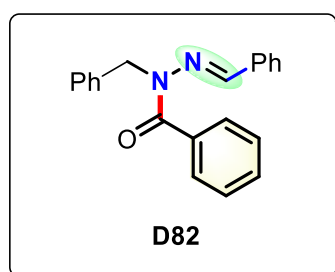

### N-benzyl-N'-benzylidenebenzohydrazide (D82)

The title compound was prepared according to the general procedure and purified by column chromatography to give a yellow solid 100.5 mg, 64% yield. Purification by

column chromatography on silica gel (pentane/ethyl ether = 20 : 1 – 5:1).

**<sup>1</sup>H NMR** (400 MHz, 23.0 °C, CDCl<sub>3</sub>) δ 7.89 – 7.77 (m, 2H), 7.68 (s, 1H), 7.55 – 7.40 (m, 3H), 7.41 – 7.19 (m, 10H), 5.43 (s, 2H) ppm.

**<sup>13</sup>C NMR** (101 MHz, 23.0 °C, CDCl<sub>3</sub>) δ 171.51, 140.20, 135.19, 135.08, 134.62, 130.51, 130.05, 129.69, 129.10, 128.68, 127.54, 127.52, 127.23, 126.50, 45.54 ppm.

**HRMS** (ESI) calcd. for C<sub>21</sub>H<sub>19</sub>N<sub>2</sub>O [M+H]: 315.1497, found: 315.1498.

**Elemental Analysis** calcd for C<sub>21</sub>H<sub>18</sub>N<sub>2</sub>O: C, 80.23; H, 5.77; N, 8.91; O, 5.09; found: C, 80.20; H, 5.76; N, 8.94.

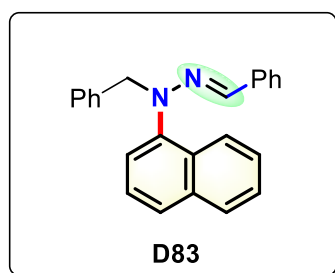

### 1-benzyl-2-benzylidene-1-(naphthalen-1-yl)hydrazine (D83)

The title compound was prepared according to the general procedure and purified by column chromatography to give a yellow solid 122.8 mg, 73% yield. Purification by column chromatography on silica gel (pentane/ethyl ether = 20 : 1 – 5:1).

**<sup>1</sup>H NMR** (400 MHz, 23.0 °C, CDCl<sub>3</sub>) δ 8.04 (d, *J* = 8.2 Hz, 1H), 7.88 (d, *J* = 7.6 Hz, 1H), 7.75 (d, *J* = 8.2 Hz, 1H), 7.51 – 7.39 (m, 7H), 7.34 – 7.23 (m, 6H), 7.21 – 7.16 (m, 1H), 7.06 (s, 1H), 5.06 (s, 2H) ppm.

**<sup>13</sup>C NMR** (101 MHz, 23.0 °C, CDCl<sub>3</sub>) δ 143.49, 138.27, 136.83, 135.02, 134.95, 130.10, 128.76, 128.70, 128.67, 128.22, 127.80, 127.42, 127.21, 126.69, 126.46, 126.13, 126.10, 124.20, 123.72, 60.51 ppm.

**HRMS** (ESI) calcd. for C<sub>24</sub>H<sub>21</sub>N<sub>2</sub> [M+H]: 337.1705, found: 337.1704.

**Elemental Analysis** calcd for C<sub>24</sub>H<sub>20</sub>N<sub>2</sub>: C, 85.68; H, 5.99; N, 8.33; found: C, 85.64; H, 5.94; N, 8.35.

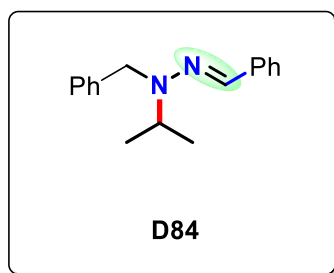

### 1-benzyl-2-benzylidene-1-isopropylhydrazine (D84)

The title compound was prepared according to the general procedure and purified by column chromatography to give a yellow solid 64.3 mg, 51% yield. Purification by column chromatography on silica gel (pentane/ethyl ether = 20 : 1 – 5:1).

$^1\text{H NMR}$  (400 MHz, 23.0 °C,  $\text{CDCl}_3$ )  $\delta$  7.49 – 7.43 (m, 2H), 7.33 – 7.23 (m, 7H), 7.14 (t,  $J = 7.3$  Hz, 1H), 7.07 (s, 1H), 4.36 (s, 2H), 3.80 (t,  $J = 6.6$  Hz, 1H), 1.29 (d,  $J = 6.6$  Hz, 6H) ppm.

$^{13}\text{C NMR}$  (101 MHz, 23.0 °C,  $\text{CDCl}_3$ )  $\delta$  138.19, 137.51, 130.69, 128.70, 128.33, 126.86, 126.80, 126.43, 125.32, 57.76, 52.61, 20.41 ppm.

**HRMS** (ESI) calcd. for  $\text{C}_{17}\text{H}_{21}\text{N}_2$  [M+H]: 253.1705, found: 253.1706.

**Elemental Analysis** calcd for  $\text{C}_{17}\text{H}_{20}\text{N}_2$ : C, 80.91; H, 7.99; N, 11.10; found: C, 80.96; H, 7.95; N, 11.12.

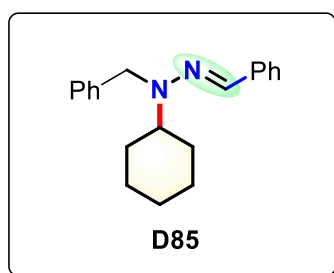

### 1-benzyl-2-benzylidene-1-cyclohexylhydrazine (D85)

The title compound was prepared according to the general procedure and purified by column chromatography to give a yellow solid 81.8 mg, 56% yield. Purification by column chromatography on silica gel (pentane/ethyl ether = 20 : 1 – 5:1).

$^1\text{H NMR}$  (400 MHz, 23.0 °C,  $\text{CDCl}_3$ )  $\delta$  7.47 – 7.42 (m, 2H), 7.35 – 7.22 (m, 7H), 7.16 – 7.09 (m, 1H), 7.03 (s, 1H), 4.44 (s, 2H), 3.36 (t,  $J = 11.6, 3.7$  Hz, 1H), 2.05 – 1.97 (m, 2H), 1.84 (d,  $J = 13.2$  Hz, 2H), 1.66 (d,  $J = 14.3$  Hz, 1H), 1.58 (t,  $J = 12.3, 3.4$  Hz, 2H),

1.38 – 1.28 (m, 2H), 1.18 (t,  $J = 12.8, 3.4$  Hz, 1H) ppm.

$^{13}\text{C}$  NMR (101 MHz, 23.0 °C,  $\text{CDCl}_3$ )  $\delta$  138.25, 137.66, 129.66, 128.65, 128.31, 126.80, 126.59, 126.36, 125.23, 66.30, 52.97, 31.27, 25.91 ppm.

HRMS (ESI) calcd. for  $\text{C}_{20}\text{H}_{25}\text{N}_2$  [ $\text{M}+\text{H}$ ]: 293.2018, found: 293.2017.

Elemental Analysis calcd for  $\text{C}_{20}\text{H}_{24}\text{N}_2$ : C, 82.15; H, 8.27; N, 9.58; found: C, 82.14; H, 8.23; N, 9.56.

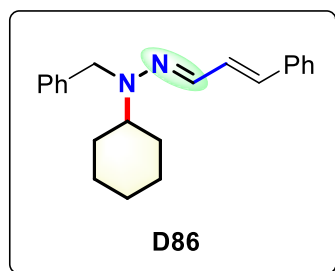

### 2-((*E*)-benzylidene)-1-cinnamyl-1-cyclohexylhydrazine (D86)

The title compound was prepared according to the general procedure and purified by column chromatography to give a yellow solid 79.6 mg, 50% yield. Purification by column chromatography on silica gel (pentane/ethyl ether = 20 : 1 – 5:1).

$^1\text{H}$  NMR (400 MHz,  $\text{CDCl}_3$ )  $\delta$  7.57 – 7.47 (m, 2H), 7.39 – 7.10 (m, 9H), 6.58 – 6.49 (m, 1H), 6.29 – 6.17 (m, 1H), 4.07 – 3.96 (m, 2H), 3.38 – 3.22 (m, 1H), 2.02 – 1.90 (m, 2H), 1.88 – 1.78 (m, 2H), 1.72 – 1.48 (m, 3H), 1.42 – 1.06 (m, 3H).

$^{13}\text{C}$  NMR (101 MHz,  $\text{CDCl}_3$ )  $\delta$  137.8, 137.0, 130.8, 129.4, 128.6, 128.4, 127.4, 126.6, 126.3, 125.3, 125.2, 65.7, 50.6, 31.3, 26.0.

HRMS (ESI) calcd. for  $\text{C}_{22}\text{H}_{27}\text{N}_2$  [ $\text{M}+\text{H}$ ]: 319.2169, found: 319.2170.

Elemental Analysis calcd for  $\text{C}_{22}\text{H}_{26}\text{N}_2$ : C, 97; H, 8.23; N, 8.80; found: C, 82.94; H, 8.22; N, 8.82.

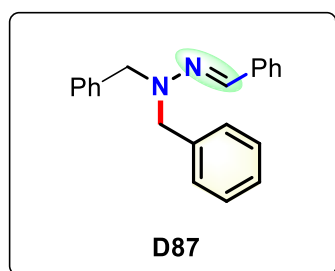

### 1,1-dibenzyl-2-benzylidenehydrazine (D87)

The title compound was prepared according to the general procedure and purified by column chromatography to give a yellow solid 109.6 mg, 73% yield. Purification by column chromatography on silica gel (pentane/ethyl ether = 20 : 1 – 5:1).

$^1\text{H NMR}$  (400 MHz, 23.0 °C,  $\text{CDCl}_3$ )  $\delta$  7.49 (d,  $J = 7.3$  Hz, 2H), 7.34 – 7.25 (m, 10H), 7.24 – 7.16 (m, 3H), 4.51 (s, 4H) ppm.

$^{13}\text{C NMR}$  (101 MHz, 23.0 °C,  $\text{CDCl}_3$ )  $\delta$  137.67, 137.01, 131.88, 128.63, 128.49, 127.87, 127.71, 127.26, 125.62, 57.96 ppm.

**HRMS** (ESI) calcd. for  $\text{C}_{21}\text{H}_{21}\text{N}_2$  [ $\text{M}+\text{H}$ ]: 301.1705, found: 301.1704.

**Elemental Analysis** calcd for  $\text{C}_{21}\text{H}_{20}\text{N}_2$ : C, 83.96; H, 6.71; N, 9.33; found: C, 83.94; H, 6.73; N, 9.32.

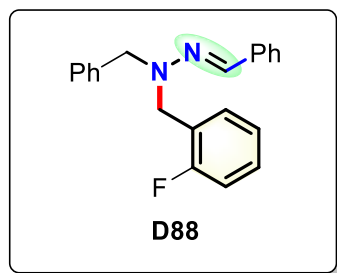

### 2-((*E*)-benzylidene)-1-cinnamyl-1-(2-fluorobenzyl)hydrazine (D88)

The title compound was prepared according to the general procedure and purified by column chromatography to give a yellow solid 119.3 mg, 75% yield. Purification by column chromatography on silica gel (pentane/ethyl ether = 20 : 1 – 5:1).

$^1\text{H NMR}$  (400 MHz,  $\text{CDCl}_3$ )  $\delta$  7.52 (d,  $J = 7.2$  Hz, 2H), 7.39 – 7.21 (m, 8H), 7.20 – 7.10 (m, 3H), 7.08 – 6.95 (m, 2H), 6.49 (d,  $J = 16.0$  Hz, 1H), 6.31 – 6.15 (m, 1H), 4.56 (s, 2H), 4.16 – 4.03 (m, 2H).

$^{13}\text{C NMR}$  (101 MHz,  $\text{CDCl}_3$ )  $\delta$  162.0, 159.6, 137.1, 137.0, 132.8, 132.3, 130.2, 129.1, 129.0, 128.8, 128.7, 127.8, 127.5, 126.6, 125.8, 125.0, 124.8, 124.4, 124.4, 115.6, 115.4, 56.5, 51.0.

$^{19}\text{F NMR}$  (376 MHz,  $\text{CDCl}_3$ )  $\delta = -117.8$ .

**HRMS** (ESI) calcd. for  $\text{C}_{23}\text{H}_{21}\text{FN}_2$  [ $\text{M}+\text{H}$ ]: 345.1761, found: 345.1762.

**Elemental Analysis** calcd for  $\text{C}_{23}\text{H}_{20}\text{FN}_2$ : C, 79.22; H, 6.02; F, 5.97; N, 8.80; found: C, 79.25; H, 6.04; N, 8.84.

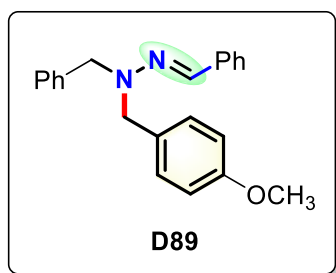

### 2-((*E*)-benzylidene)-1-cinnamyl-1-(4-methoxybenzyl)hydrazine (D89)

The title compound was prepared according to the general procedure and purified by column chromatography to give a yellow solid 117.2 mg, 71% yield. Purification by column chromatography on silica gel (pentane/ethyl ether = 20 : 1 – 5:1).

<sup>1</sup>H NMR (400 MHz, CDCl<sub>3</sub>) δ 7.60 – 7.47 (m, 2H), 7.38 – 7.11 (m, 11H), 6.87 – 6.78 (m, 2H), 6.52 – 6.39 (m, 1H), 6.28 – 6.15 (m, 1H), 4.45 (s, 2H), 4.08 – 3.98 (m, 2H), 3.72 (s, 3H).

<sup>13</sup>C NMR (101 MHz, CDCl<sub>3</sub>) δ 156.0, 137.2, 137.0, 132.6, 132.1, 129.8, 129.1, 128.7, 128.6, 127.7, 127.4, 126.5, 125.7, 125.1, 114.1, 57.3, 55.5, 55.4.

HRMS (ESI) calcd. for C<sub>24</sub>H<sub>25</sub>N<sub>2</sub>O [M+H]: 357.1961, found: 357.1961.

Elemental Analysis calcd for C<sub>24</sub>H<sub>24</sub>N<sub>2</sub>O: C, 79.97; H, 6.71; N, 8.48; O, 4.84; found: C, 79.96; H, 6.74; N, 8.42.

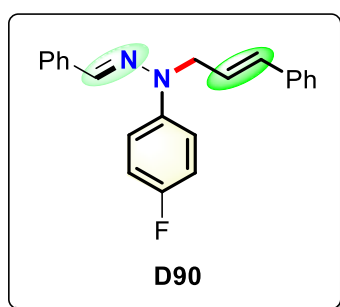

### 2-(benzylidene)-1-cinnamyl-1-(4-fluorophenyl)hydrazine (D90)

The title compound was prepared according to the general procedure and purified by column chromatography to give a yellow solid 189.2 mg, 74% yield. Purification by column chromatography on silica gel (pentane/ethyl ether = 20 : 1 – 5:1).

<sup>1</sup>H NMR (400 MHz, 23.0 °C, CDCl<sub>3</sub>) δ 7.43 (s, 1H), 7.37 – 7.12 (m, 8H), 7.08 – 6.93 (m, 3H), 6.40 (d, *J* = 16.1 Hz, 1H), 6.29 – 6.09 (m, 2H), 4.72 – 4.45 (m, 2H) ppm.

$^{13}\text{C}$  NMR (101 MHz, 23.0 °C,  $\text{CDCl}_3$ )  $\delta$  159.07, 156.70, 144.20, 144.18, 136.58, 136.35, 132.60, 131.47, 128.71, 128.64, 128.04, 127.90, 126.51, 126.26, 121.68, 116.31, 116.24, 115.82, 115.60, 49.08 ppm.

$^{19}\text{F}$  NMR (377 MHz, 23.0 °C,  $\text{CDCl}_3$ )  $\delta$  -123.94 ppm.

HRMS (ESI) calcd. for  $\text{C}_{22}\text{H}_{20}\text{FN}_2$  [M+H]: 331.1610, found: 331.1613.

Elemental Analysis calcd for  $\text{C}_{22}\text{H}_{19}\text{FN}_2$ : C, 79.97; H, 5.80; F, 5.75; N, 8.48; found: C, 79.94; H, 5.82; N, 8.45.

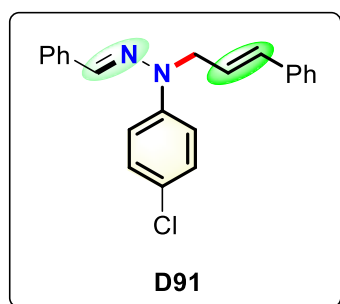

### 2-(benzylidene)-1-(4-chlorophenyl)-1-cinnamylhydrazine (D91)

The title compound was prepared according to the general procedure and purified by column chromatography to give a yellow solid 140.5 mg, 81% yield. Purification by column chromatography on silica gel (pentane/ethyl ether = 20 : 1 – 5:1).

$^1\text{H}$  NMR (400 MHz, 23.0 °C,  $\text{CDCl}_3$ )  $\delta$  7.77 – 7.57 (m, 2H), 7.47 (s, 1H), 7.42 – 7.04 (m, 12H), 6.38 (d,  $J$  = 16.1, 2.0 Hz, 1H), 6.18 (d,  $J$  = 16.0, 4.0 Hz, 1H), 4.59 (dd,  $J$  = 4.0, 2.0 Hz, 2H) ppm.

$^{13}\text{C}$  NMR (101 MHz, 23.0 °C,  $\text{CDCl}_3$ )  $\delta$  146.21, 136.36, 136.25, 133.20, 131.53, 129.09, 128.72, 128.70, 128.25, 127.93, 126.50, 126.46, 126.39, 125.58, 121.31, 115.95, 48.36 ppm.

HRMS (ESI) calcd. for  $\text{C}_{22}\text{H}_{20}\text{ClN}_2$  [M+H]: 347.1315, found: 347.1316.

Elemental Analysis calcd for  $\text{C}_{22}\text{H}_{19}\text{ClN}_2$ : C, 76.18; H, 5.52; Cl, 10.22; N, 8.08; found: C, 76.14; H, 5.55; N, 8.03.



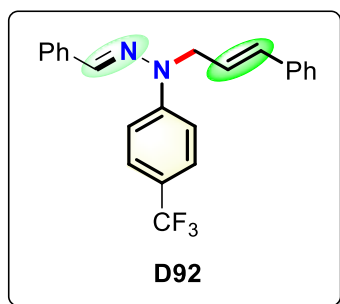

**2-(benzylidene)-1-cinnamyl-1-(4-(trifluoromethoxy)phenyl)hydrazine (D92)**

The title compound was prepared according to the general procedure and purified by column chromatography to give a yellow solid 171.1 mg, 90% yield. Purification by column chromatography on silica gel (pentane/ethyl ether = 20 : 1 – 5:1).

**<sup>1</sup>H NMR** (400 MHz, 23.0 °C, CDCl<sub>3</sub>) δ 7.66 (d, *J* = 7.7 Hz, 1H), 7.48 (s, 1H), 7.42 – 7.05 (m, 9H), 6.39 (d, *J* = 16.0 Hz, 1H), 6.19 (d, *J* = 16.0, 4.0 Hz, 2H), 4.78 – 4.43 (m, 2H) ppm.

**<sup>13</sup>C NMR** (101 MHz, 23.0 °C, CDCl<sub>3</sub>) δ 146.34, 142.99, 142.98, 136.33, 136.24, 133.44, 131.59, 128.73, 128.72, 128.32, 127.97, 126.51, 126.41, 122.16, 122.10, 121.26, 115.44, 48.44 ppm.

**<sup>19</sup>F NMR** (377 MHz, 23.0 °C, CDCl<sub>3</sub>) δ -58.05 ppm.

**HRMS** (ESI) calcd. for C<sub>23</sub>H<sub>20</sub>F<sub>3</sub>N<sub>2</sub>O [M+H]: 397.1528, found: 397.1527.

**Elemental Analysis** calcd for C<sub>23</sub>H<sub>19</sub>F<sub>3</sub>N<sub>2</sub>O: C, 69.69; H, 4.83; F, 14.38; N, 7.07; O, 4.04; found: C, 69.66; H, 4.86; N, 7.05.

## 6. Mechanism investigations

### 6.1 Control experiments

#### 6.1.1

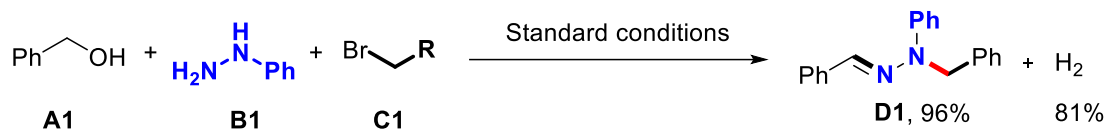

Using a nitrogen-filled glove box, an oven-dried pressure tube (38 mL volume) was charged with a magnetic stirring bar,  $\text{MnBr}(\text{CO})_5$  (1.0 mol%), **L11** (1.2 mol%),  $t\text{BuOK}$  (1.0 mmol), **A1** (0.8 mmol), **B1** (0.5 mmol), **C1** (0.7 mmol) and THF (3 mL). Then the seal tube was closed tightly with a teflon cap, removed from the glove box and immersed into a pre-heated metal bath (100 °C) for design time. After the reaction was finished, the reaction was analyzed by TLC to monitor product formation. Then a small aliquot of the organic phase and gas were analyzed by GC and GC-MS to monitor product formation in the reported yield.

#### 6.1.2

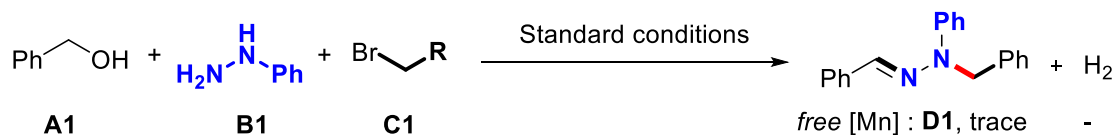

Using a nitrogen-filled glove box, an oven-dried pressure tube (38 mL volume) was charged with a magnetic stirring bar, **L11** (1.2 mol%),  $t\text{BuOK}$  (1.0 mmol), **A1** (0.8 mmol), **B1** (0.5 mmol), **C1** (0.7 mmol) and THF (3 mL). Then the seal tube was closed tightly with a teflon cap, removed from the glove box and immersed into a pre-heated metal bath (100 °C) for design time. After the reaction was finished, the reaction was analyzed by TLC to monitor product formation. Then a small aliquot of the organic phase and gas were analyzed by GC and GC-MS to monitor product formation in the reported yield.

### 6.1.3

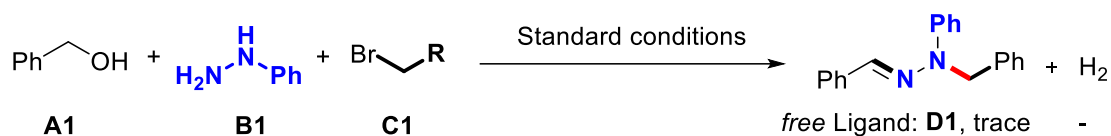

Using a nitrogen-filled glove box, an oven-dried pressure tube (38 mL volume) was charged with a magnetic stirring bar, MnBr(CO)<sub>5</sub> (1.0 mol%), <sup>t</sup>BuOK (1.0 mmol), **A1** (0.8 mmol), **B1** (0.5 mmol), **C1** (0.7 mmol) and THF (3 mL). Then the seal tube was closed tightly with a teflon cap, removed from the glove box and immersed into a pre-heated metal bath (100 °C) for design time. After the reaction was finished, the reaction was analyzed by TLC to monitor product formation. Then a small aliquot of the organic phase and gas were analyzed by GC and GC-MS to monitor product formation in the reported yield.

### 6.1.4

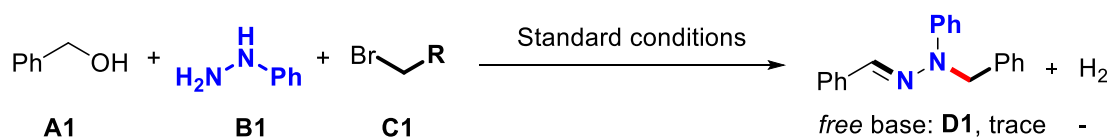

Using a nitrogen-filled glove box, an oven-dried pressure tube (38 mL volume) was charged with a magnetic stirring bar, MnBr(CO)<sub>5</sub> (1.0 mol%), **L11** (1.2 mol%), **A1** (0.8 mmol), **B1** (0.5 mmol), **C1** (0.7 mmol) and THF (3 mL). Then the seal tube was closed tightly with a teflon cap, removed from the glove box and immersed into a pre-heated metal bath (100 °C) for design time. After the reaction was finished, the reaction was analyzed by TLC to monitor product formation. Then a small aliquot of the organic phase and gas were analyzed by GC and GC-MS to monitor product formation in the reported yield.

### 6.1.5

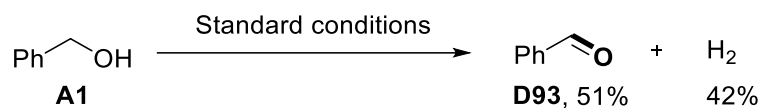

Using a nitrogen-filled glove box, an oven-dried pressure tube (38 mL volume) was charged with a magnetic stirring bar, MnBr(CO)<sub>5</sub> (1.0 mol%), **L11** (1.2 mol%), <sup>t</sup>BuOK (1.0 mmol), **A1** (0.8 mmol) and THF (3 mL). Then the seal tube was closed tightly with a teflon cap, removed from the glove box and immersed into a pre-heated metal bath (100 °C) for design time. After the reaction was finished, the reaction was analyzed by TLC to monitor product formation. Then a small aliquot of the organic phase and gas were analyzed by GC and GC-MS to monitor product formation in the reported yield.

### 6.1.6

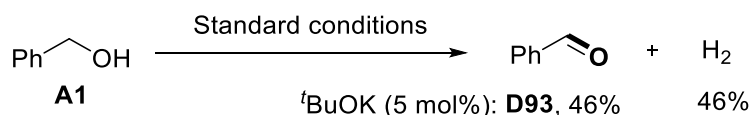

Using a nitrogen-filled glove box, an oven-dried pressure tube (38 mL volume) was charged with a magnetic stirring bar, MnBr(CO)<sub>5</sub> (1.0 mol%), **L11** (1.2 mol%), <sup>t</sup>BuOK (0.025 mmol), **A1** (0.8 mmol) and THF (3 mL). Then the seal tube was closed tightly with a teflon cap, removed from the glove box and immersed into a pre-heated metal bath (100 °C) for design time. After the reaction was finished, the reaction was analyzed by TLC to monitor product formation. Then a small aliquot of the organic phase and gas were analyzed by GC and GC-MS to monitor product formation in the reported yield.

### 6.1.7

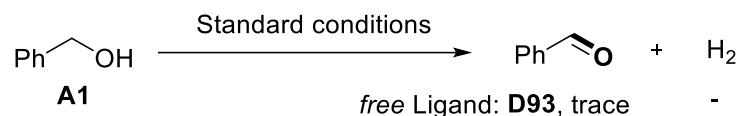

Using a nitrogen-filled glove box, an oven-dried pressure tube (38 mL volume) was charged with a magnetic stirring bar, MnBr(CO)<sub>5</sub> (1.0 mol%), <sup>t</sup>BuOK (1.0 mmol), **A1** (0.8 mmol) and THF (3 mL). Then the seal tube was closed tightly with a teflon cap, removed from the glove box and immersed into a pre-heated metal bath (100 °C) for design time. After the reaction was finished, the reaction was analyzed by TLC to monitor product formation. Then a small aliquot of the organic phase and gas were analyzed by GC and GC-MS to monitor product formation in the reported yield.

### 6.1.8

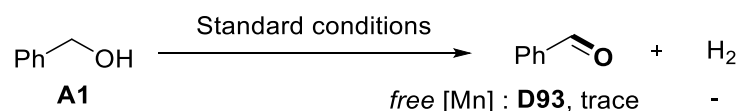

Using a nitrogen-filled glove box, an oven-dried pressure tube (38 mL volume) was charged with a magnetic stirring bar, **L11** (1.2 mol%), <sup>t</sup>BuOK (1.0 mmol), **A1** (0.8 mmol) and THF (3 mL). Then the seal tube was closed tightly with a teflon cap, removed from the glove box and immersed into a pre-heated metal bath (100 °C) for design time. After the reaction was finished, the reaction was analyzed by TLC to monitor product formation. Then a small aliquot of the organic phase and gas were analyzed by GC and GC-MS to monitor product formation in the reported yield.

### 6.2.1

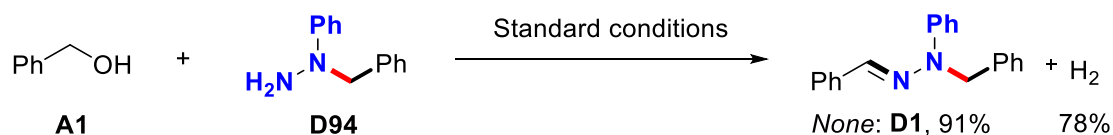

Using a nitrogen-filled glove box, an oven-dried pressure tube (38 mL volume) was charged with a magnetic stirring bar, MnBr(CO)<sub>5</sub> (1.0 mol%), **L11** (1.2 mol%), <sup>t</sup>BuOK (1.0 mmol), **A1** (0.8 mmol), **D94** (0.5 mmol) and THF (3 mL). Then the seal tube was

closed tightly with a teflon cap, removed from the glove box and immersed into a pre-heated metal bath (100 °C) for design time. After the reaction was finished, the reaction was analyzed by TLC to monitor product formation. Then a small aliquot of the organic phase and gas were analyzed by GC and GC-MS to monitor product formation in the reported yield.

### 6.2.2

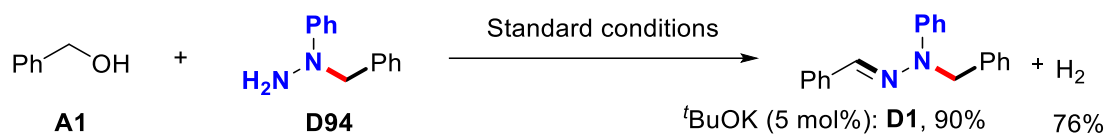

Using a nitrogen-filled glove box, an oven-dried pressure tube (38 mL volume) was charged with a magnetic stirring bar, MnBr(CO)<sub>5</sub> (1.0 mol%), **L11** (1.2 mol%), *t*BuOK (1.0 mmol), **A1** (0.8 mmol), **D94** (0.5 mmol) and THF (3 mL). Then the seal tube was closed tightly with a teflon cap, removed from the glove box and immersed into a pre-heated metal bath (100 °C) for design time. After the reaction was finished, the reaction was analyzed by TLC to monitor product formation. Then a small aliquot of the organic phase and gas were analyzed by GC and GC-MS to monitor product formation in the reported yield.

### 6.2.3

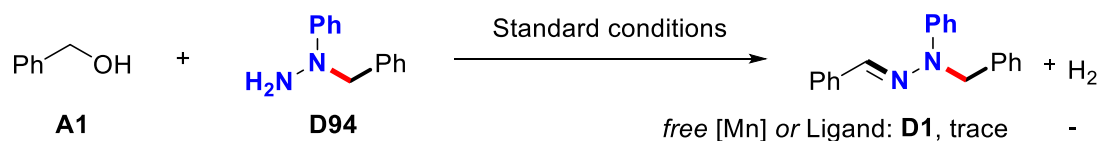

Using a nitrogen-filled glove box, an oven-dried pressure tube (38 mL volume) was charged with a magnetic stirring bar, MnBr(CO)<sub>5</sub> (1.0 mol%), **L11** (1.2 mol%), *t*BuOK (1.0 mmol), **A1** (0.8 mmol), **D94** (0.5 mmol) and THF (3 mL). Then the seal tube was closed tightly with a teflon cap, removed from the glove box and immersed into a pre-heated metal bath (100 °C) for design time. After the reaction was finished, the reaction was analyzed by TLC to monitor product formation. Then a small aliquot of the organic

phase and gas were analyzed by GC and GC-MS to monitor product formation in the reported yield.

#### 6.2.4

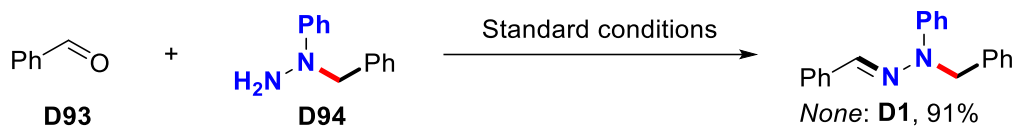

Using a nitrogen-filled glove box, an oven-dried pressure tube (38 mL volume) was charged with a magnetic stirring bar,  $\text{MnBr}(\text{CO})_5$  (1.0 mol%), **L11** (1.2 mol%),  $t\text{BuOK}$  (1.0 mmol), **D93** (0.8 mmol), **D94** (0.5 mmol) and THF (3 mL). Then the seal tube was closed tightly with a teflon cap, removed from the glove box and immersed into a pre-heated metal bath (100 °C) for design time. After the reaction was finished, the reaction was analyzed by TLC to monitor product formation. Then a small aliquot of the organic phase and gas were analyzed by GC and GC-MS to monitor product formation in the reported yield.

#### 6.2.5

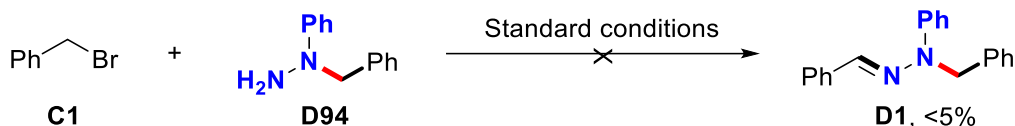

Using a nitrogen-filled glove box, an oven-dried pressure tube (38 mL volume) was charged with a magnetic stirring bar,  $\text{MnBr}(\text{CO})_5$  (1.0 mol%), **L11** (1.2 mol%),  $t\text{BuOK}$  (1.0 mmol), **A1** (0.8 mmol), **D94** (0.5 mmol) and THF (3 mL). Then the seal tube was closed tightly with a teflon cap, removed from the glove box and immersed into a pre-heated metal bath (100 °C) for design time. After the reaction was finished, the reaction was analyzed by TLC to monitor product formation. Then a small aliquot of the organic phase and gas were analyzed by GC and GC-MS to monitor product formation in the reported yield.

### 6.2.6

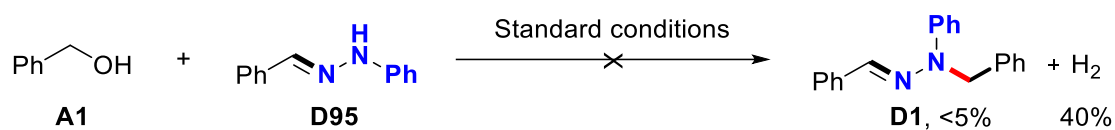

Using a nitrogen-filled glove box, an oven-dried pressure tube (38 mL volume) was charged with a magnetic stirring bar, MnBr(CO)<sub>5</sub> (1.0 mol%), L11 (1.2 mol%), <sup>t</sup>BuOK (1.0 mmol), A1 (0.8 mmol), D95 (0.5 mmol) and THF (3 mL). Then the seal tube was closed tightly with a teflon cap, removed from the glove box and immersed into a pre-heated metal bath (100 °C) for design time. After the reaction was finished, the reaction was analyzed by TLC to monitor product formation. Then a small aliquot of the organic phase and gas were analyzed by GC and GC-MS to monitor product formation in the reported yield.

### 6.2.7

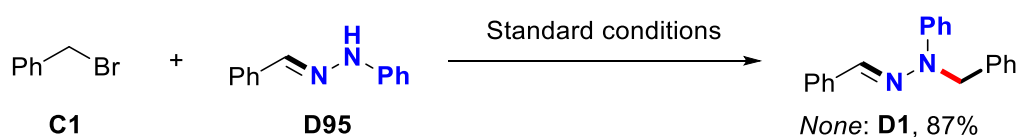

Using a nitrogen-filled glove box, an oven-dried pressure tube (38 mL volume) was charged with a magnetic stirring bar, MnBr(CO)<sub>5</sub> (1.0 mol%), L11 (1.2 mol%), <sup>t</sup>BuOK (1.0 mmol), C1 (0.8 mmol), D95 (0.5 mmol) and THF (3 mL). Then the seal tube was closed tightly with a teflon cap, removed from the glove box and immersed into a pre-heated metal bath (100 °C) for design time. After the reaction was finished, the reaction was analyzed by TLC to monitor product formation. Then a small aliquot of the organic phase and gas were analyzed by GC and GC-MS to monitor product formation in the reported yield.



## 6.2.8

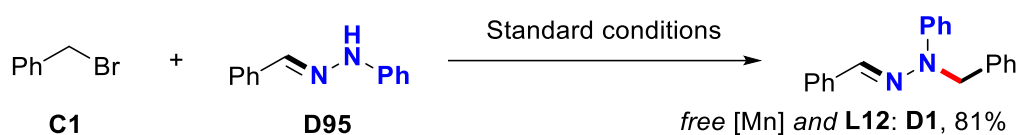

Using a nitrogen-filled glove box, an oven-dried pressure tube (38 mL volume) was charged with a magnetic stirring bar, MnBr(CO)<sub>5</sub> (1.0 mol%), **L11** (1.2 mol%), <sup>t</sup>BuOK (1.0 mmol), **C1** (0.8 mmol), **D95** (0.5 mmol) and THF (3 mL). Then the seal tube was closed tightly with a teflon cap, removed from the glove box and immersed into a pre-heated metal bath (100 °C) for design time. After the reaction was finished, the reaction was analyzed by TLC to monitor product formation. Then a small aliquot of the organic phase and gas were analyzed by GC and GC-MS to monitor product formation in the reported yield.

## 6.2.9

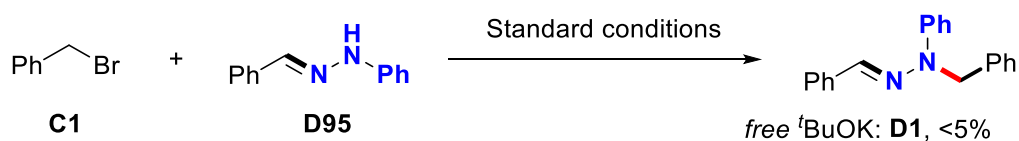

Using a nitrogen-filled glove box, an oven-dried pressure tube (38 mL volume) was charged with a magnetic stirring bar, MnBr(CO)<sub>5</sub> (1.0 mol%), **L11** (1.2 mol%), <sup>t</sup>BuOK (1.0 mmol), **C1** (0.8 mmol), **D95** (0.5 mmol) and **C1** (0.7 mmol) and THF (3 mL). Then the seal tube was closed tightly with a teflon cap, removed from the glove box and immersed into a pre-heated metal bath (100 °C) for design time. After the reaction was finished, the reaction was analyzed by TLC to monitor product formation. Then a small aliquot of the organic phase and gas were analyzed by GC and GC-MS to monitor product formation in the reported yield.

### 6.2.10

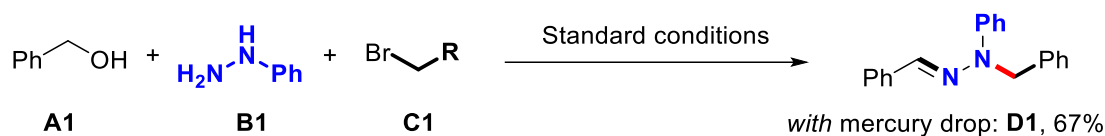

Using a nitrogen-filled glove box, an oven-dried pressure tube (38 mL volume) was charged with a magnetic stirring bar,  $\text{MnBr}(\text{CO})_5$  (1.0 mol%), **L11** (1.2 mol%),  $t\text{BuOK}$  (1.0 mmol), mercury (2 drops), **A1** (0.8 mmol), **B1** (0.5 mmol), **C1** (0.7 mmol) and THF (3 mL). Then the seal tube was closed tightly with a teflon cap, removed from the glove box and immersed into a pre-heated metal bath (100 °C) for design time. After the reaction was finished, the reaction was analyzed by TLC to monitor product formation. Then a small aliquot of the organic phase and gas were analyzed by GC and GC-MS to monitor product formation in the reported yield.

### 6.2.11

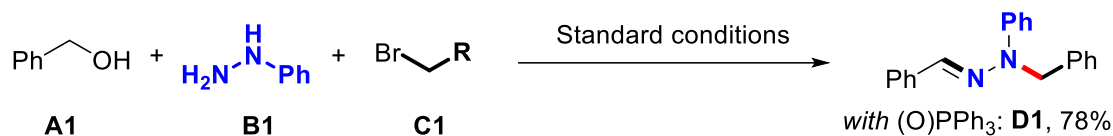

Using a nitrogen-filled glove box, an oven-dried pressure tube (38 mL volume) was charged with a magnetic stirring bar,  $\text{MnBr}(\text{CO})_5$  (1.0 mol%), **L11** (1.2 mol%),  $t\text{BuOK}$  (1.0 mmol),  $(\text{O})\text{PPh}_3$  (1.0 mmol) **A1** (0.8 mmol), **B1** (0.5 mmol), **C1** (0.7 mmol) and THF (3 mL). Then the seal tube was closed tightly with a teflon cap, removed from the glove box and immersed into a pre-heated metal bath (100 °C) for design time. After the reaction was finished, the reaction was analyzed by TLC to monitor product formation. Then a small aliquot of the organic phase and gas were analyzed by GC and GC-MS to monitor product formation in the reported yield.

### 6.2.12

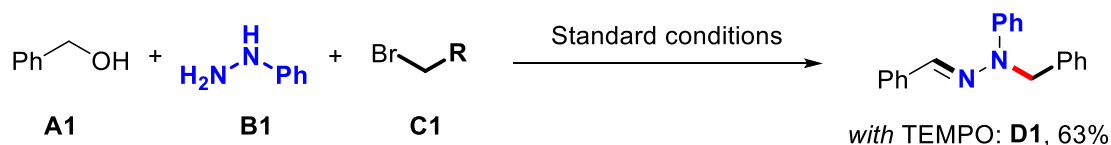

Using a nitrogen-filled glove box, an oven-dried pressure tube (38 mL volume) was

charged with a magnetic stirring bar,  $\text{MnBr}(\text{CO})_5$  (1.0 mol%), **L11** (1.2 mol%),  $t\text{BuOK}$  (1.0 mmol), TEMPO (1.0 mmol), **A1** (0.8 mmol), **B1** (0.5 mmol), **C1** (0.7 mmol) and THF (3 mL). Then the seal tube was closed tightly with a teflon cap, removed from the glove box and immersed into a pre-heated metal bath (100 °C) for design time. After the reaction was finished, the reaction was analyzed by TLC to monitor product formation. Then a small aliquot of the organic phase and gas were analyzed by GC and GC-MS to monitor product formation in the reported yield.

### 6.2.13

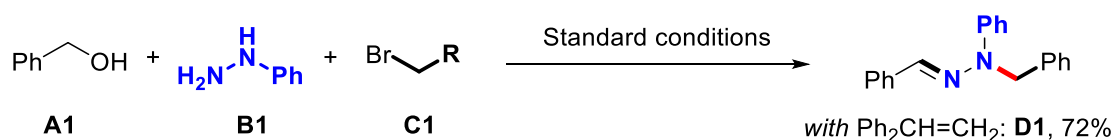

Using a nitrogen-filled glove box, an oven-dried pressure tube (38 mL volume) was charged with a magnetic stirring bar,  $\text{MnBr}(\text{CO})_5$  (1.0 mol%), **L11** (1.2 mol%),  $t\text{BuOK}$  (1.0 mmol),  $\text{Ph}_2\text{CHCH}_2$  (1.0 mmol), **A1** (0.8 mmol), **B1** (0.5 mmol) and **C1** (0.7 mmol) and THF (3 mL). Then the seal tube was closed tightly with a teflon cap, removed from the glove box and immersed into a pre-heated metal bath (100 °C) for design time. After the reaction was finished, the reaction was analyzed by TLC to monitor product formation. Then a small aliquot of the organic phase and gas were analyzed by GC and GC-MS to monitor product formation in the reported yield.

## 7. Gram-Scale Synthesis

### 7.1 Gram-Scale Synthesis of D1

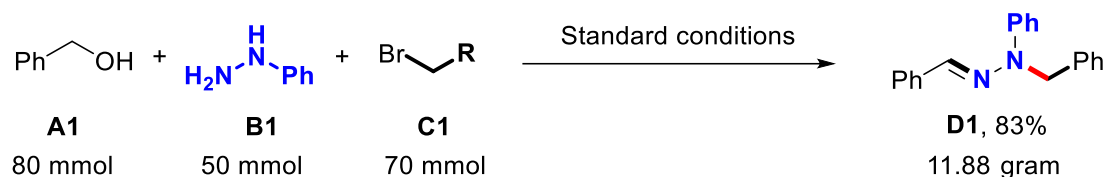

Using a nitrogen-filled glove box, an oven-dried Schlenk Flask (1000 mL volume) was charged with a magnetic stirring bar,  $\text{MnBr}(\text{CO})_5$  (1.0 mol%), **L11** (1.2 mol%),  $t\text{BuOK}$  (100.0 mmol), **A1** (80 mmol), **B1** (50 mmol), **C1** (70 mmol) and THF (300 mL). Then the Schlenk Flask was closed tightly with a teflon cap, removed from the glove box and immersed into a pre-heated metal bath (100 °C) condensation reflux 24 hours under  $\text{N}_2$  atmosphere. After the reaction was finished, the reaction was analyzed by TLC to monitor product formation. Then a small aliquot of the organic phase and gas were analyzed by GC and GC-MS to monitor product formation. The solvent was evaporated under reduced pressure and the residue was purified by flash column chromatography (petroleum ether/dichloromethane = 20:1 – 5:1) on silica gel to give the desired product **D1** 11.88 g, the yield is 83%.

### 7.2 Gram-Scale Synthesis of D2

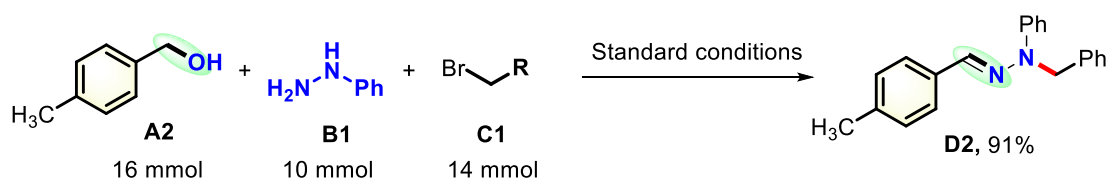

Using a nitrogen-filled glove box, an oven-dried Schlenk Flask (200 mL volume) was charged with a magnetic stirring bar,  $\text{MnBr}(\text{CO})_5$  (1.0 mol%), **L11** (1.2 mol%),  $t\text{BuOK}$  (100.0 mmol), **A2** (16 mmol), **B1** (10 mmol), **C1** (14 mmol) and THF (60 mL). Then the Schlenk Flask was closed tightly with a teflon cap, removed from the glove box and immersed into a pre-heated metal bath (100 °C) condensation reflux 24 hours under  $\text{N}_2$  atmosphere. After the reaction was finished, the reaction was analyzed by TLC to monitor product formation. Then a small aliquot of the organic phase and gas

were analyzed by GC and GC-MS to monitor product formation. The solvent was evaporated under reduced pressure and the residue was purified by flash column chromatography (petroleum ether/dichloromethane = 20:1 – 5:1) on silica gel to give the desired product **D2** in 91% (2.73 g).

### 7.3 Gram-Scale Synthesis of **D12**

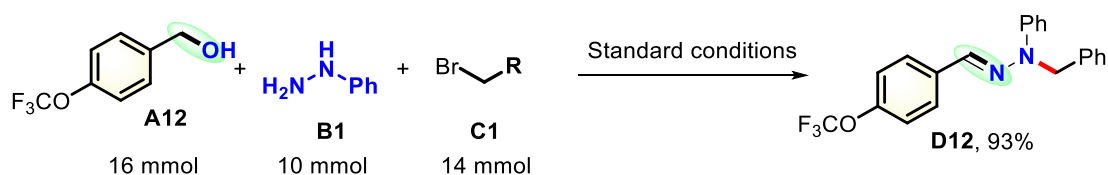

Using a nitrogen-filled glove box, an oven-dried Schlenk Flask (200 mL volume) was charged with a magnetic stirring bar,  $\text{MnBr}(\text{CO})_5$  (1.0 mol%), **L11** (1.2 mol%),  $t\text{BuOK}$  (100.0 mmol), **A12** (16 mmol), **B1** (10 mmol), **C1** (14 mmol) and THF (60 mL). Then the Schlenk Flask was closed tightly with a teflon cap, removed from the glove box and immersed into a pre-heated metal bath (100 °C) condensation reflux 24 hours under  $\text{N}_2$  atmosphere. After the reaction was finished, the reaction was analyzed by TLC to monitor product formation. Then a small aliquot of the organic phase and gas were analyzed by GC and GC-MS to monitor product formation. The solvent was evaporated under reduced pressure and the residue was purified by flash column chromatography (petroleum ether/dichloromethane = 20:1 – 5:1) on silica gel to give the desired product **D12** in 93% (3.44 g).

### 7.4 Gram-Scale Synthesis of **D43**

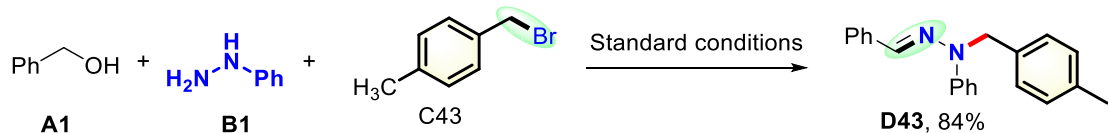

Using a nitrogen-filled glove box, an oven-dried Schlenk Flask (200 mL volume) was charged with a magnetic stirring bar,  $\text{MnBr}(\text{CO})_5$  (1.0 mol%), **L11** (1.2 mol%),  $t\text{BuOK}$  (100.0 mmol), **A1** (16 mmol), **B1** (10 mmol), **C43** (14 mmol) and THF (60 mL). Then the Schlenk Flask was closed tightly with a teflon cap, removed from the glove

box and immersed into a pre-heated metal bath (100 °C) condensation reflux 24 hours under N<sub>2</sub> atmosphere. After the reaction was finished, the reaction was analyzed by TLC to monitor product formation. Then a small aliquot of the organic phase and gas were analyzed by GC and GC-MS to monitor product formation. The solvent was evaporated under reduced pressure and the residue was purified by flash column chromatography (petroleum ether/dichloromethane = 20:1 – 5:1) on silica gel to give the desired product **D43** in 84% (2.52 g).

### 7.5 Gram-Scale Synthesis of D46

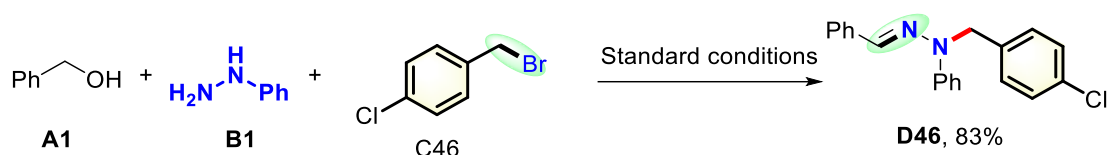

Using a nitrogen-filled glove box, an oven-dried Schlenk Flask (200 mL volume) was charged with a magnetic stirring bar, MnBr(CO)<sub>5</sub> (1.0 mol%), **L11** (1.2 mol%), <sup>t</sup>BuOK (100.0 mmol), **A1** (16 mmol), **B1** (10 mmol), **C46** (14 mmol) and THF (60 mL). Then the Schlenk Flask was closed tightly with a teflon cap, removed from the glove box and immersed into a pre-heated metal bath (100 °C) condensation reflux 24 hours under N<sub>2</sub> atmosphere. After the reaction was finished, the reaction was analyzed by TLC to monitor product formation. Then a small aliquot of the organic phase and gas were analyzed by GC and GC-MS to monitor product formation. The solvent was evaporated under reduced pressure and the residue was purified by flash column chromatography (petroleum ether/dichloromethane = 20:1 – 5:1) on silica gel to give the desired product **D46** in 84% (2.66 g).

### 7.6 Gram-Scale Synthesis of D67

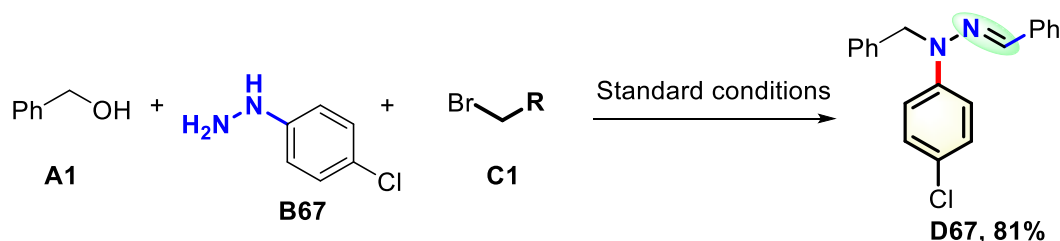

Using a nitrogen-filled glove box, an oven-dried Schlenk Flask (200 mL volume) was charged with a magnetic stirring bar, MnBr(CO)<sub>5</sub> (1.0 mol%), **L11** (1.2 mol%), <sup>t</sup>BuOK (100.0 mmol), **A1** (16 mmol), **B67**(10 mmol), **C1** (14 mmol) and THF (60 mL). Then the Schlenk Flask was closed tightly with a teflon cap, removed from the glove box and immersed into a pre-heated metal bath (100 °C) condensation reflux 24 hours under N<sub>2</sub> atmosphere. After the reaction was finished, the reaction was analyzed by TLC to monitor product formation. Then a small aliquot of the organic phase and gas were analyzed by GC and GC-MS to monitor product formation. The solvent was evaporated under reduced pressure and the residue was purified by flash column chromatography (petroleum ether/dichloromethane = 20:1 – 5:1) on silica gel to give the desired product **D67** in 81% (2.59 g).

### 7.7 Gram-Scale Synthesis of **D81**

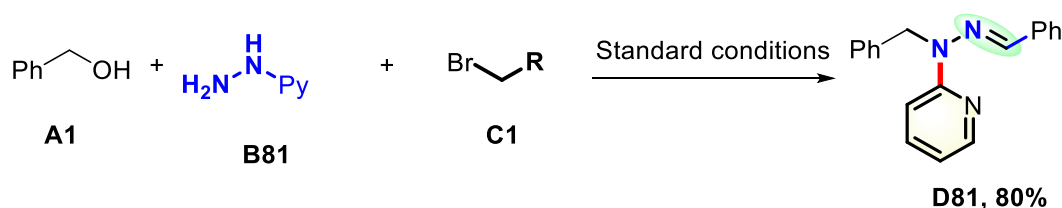

Using a nitrogen-filled glove box, an oven-dried Schlenk Flask (200 mL volume) was charged with a magnetic stirring bar, MnBr(CO)<sub>5</sub> (1.0 mol%), **L11** (1.2 mol%), <sup>t</sup>BuOK (10.0 mmol), **A1** (16 mmol), **B81** (10 mmol), **C1** (14 mmol) and THF (60 mL). Then the Schlenk Flask was closed tightly with a teflon cap, removed from the glove box and immersed into a pre-heated metal bath (100 °C) condensation reflux 24 hours under N<sub>2</sub> atmosphere. After the reaction was finished, the reaction was analyzed by TLC to monitor product formation. Then a small aliquot of the organic phase and gas were analyzed by GC and GC-MS to monitor product formation. The solvent was evaporated under reduced pressure and the residue was purified by flash column chromatography (petroleum ether/dichloromethane = 20:1 – 5:1) on silica gel to give the desired product **D81** in 80% (2.29 g).

## 8. Time-conversion-plot reaction

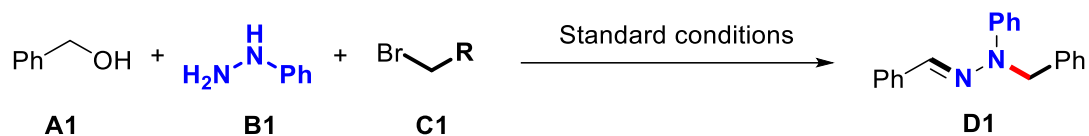

Using a nitrogen-filled glove box, an oven-dried Schlenk Flask (38 mL volume) was charged with a magnetic stirring bar, MnBr(CO)<sub>5</sub> (1.0 mol%), **L11** (1.2 mol%), <sup>t</sup>BuOK (10.0 mmol), **A1** (0.8 mmol), **B1** (0.5 mmol), **C1** (0.7 mmol) and THF (3 mL). Then the Schlenk Flask was closed tightly with a teflon cap, removed from the glove box and immersed into a pre-heated metal bath (100 °C) condensation reflux 24 hours under N<sub>2</sub> atmosphere. After the reaction was finished, the reaction was analyzed by TLC to monitor product formation. Then a small aliquot of the organic phase was analyzed by GC to monitor product formation. Composition of **D1**, **d93** and **D94** were determined by GC-analysis using *n*-Cetane as internal standard.

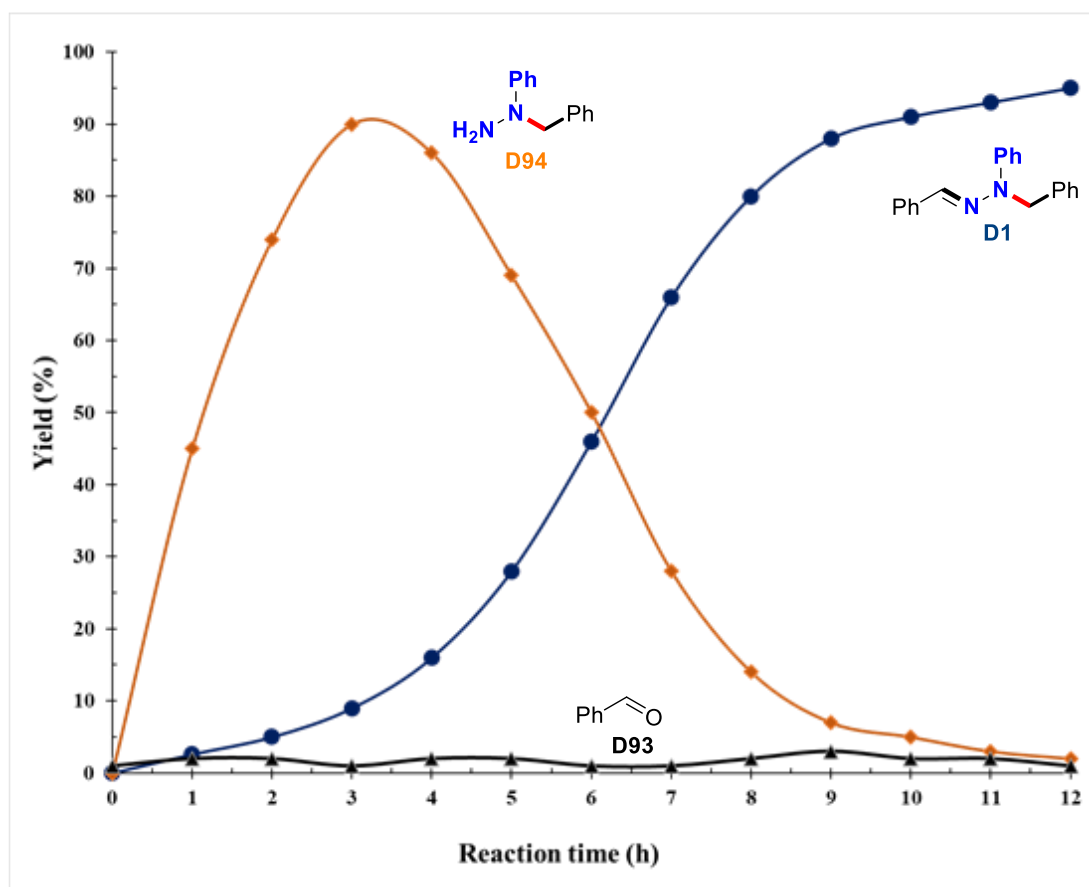

Figure S4 Time-conversion-plot for the reaction



## 9. Possible reactions in combination with hydrazone

### 9.1 Synthesis of D96 from hydrazone D1

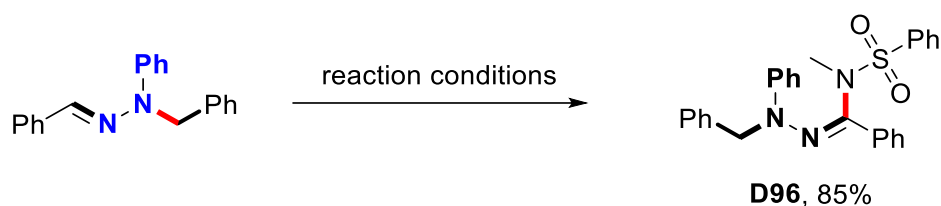

Using a nitrogen-filled glove box, an oven-dried yang-type tube (50 mL volume) was charged with a magnetic stirring bar, **D1** (0.1 mmol), *N*-methyl-*N*-((phenylsulfonyl)oxy)benzenesulfonamide (0.2 mmol), *fac*-Ir(ppy)<sub>3</sub> (0.002 mmol), Na<sub>2</sub>HPO<sub>4</sub> (0.2 mmol), and DCE (1.0 mL) were added in sequence under magnetic stirring. Then the seal tube was closed tightly with a teflon cap, immersed into a pre-cooled metal sand bath (25 °C) under visible-light irradiation. After 90 hours, a small aliquot of the organic phase was analyzed by GC and GC-MS to monitor product formation, respectively. Purification of the remainder by column chromatography on silica gel gave the corresponding product **D96** (pentane/ethyl acetate = 50/1-5/1) in the reported yield.

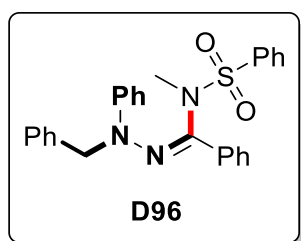

***N'*-benzyl-*N*-methyl-*N'*-phenyl-*N*-(phenylsulfonyl)benzohydrazonamide (Z:E = 1.9:1.0)<sup>[3]</sup>**

The title compound was prepared according to the general procedure and purified by column chromatography to give the yellow oil 38.7 mg, 85% yield. Purification by column chromatography on silica gel (pentane/ethyl ether = 50 : 1 – 5:1).

<sup>1</sup>H NMR (400 MHz, 23.0 °C, CDCl<sub>3</sub>) δ 7.89 (d, *J* = 8.4 Hz, 1.32H), 7.67 – 7.55 (m, 1.82H), 7.51 (d, *J* = 8.0 Hz, 1.45H), 7.45 – 7.36 (m, 1.55H), 7.30 – 7.17 (m, 6.98H), 7.17 – 7.04 (m, 3.85H), 6.99 – 6.92 (m, 1.63H), 6.83 (t, *J* = 4.4 Hz, 0.66H), 6.73 (d, *J* = 8.4 Hz, 1.26H), 4.99 (s, 0.68H), 4.43 (s, 1.31H), 3.07 (s, 1.95H), 2.79 (s, 1.04H) ppm.

$^{13}\text{C}$  NMR (101 MHz, 23.0 °C,  $\text{CDCl}_3$ )  $\delta$  157.34, 150.24, 149.28, 141.69, 139.09, 138.76, 137.51, 136.82, 135.04, 132.95, 132.81, 132.68, 129.90, 129.38, 128.81, 128.76, 128.64, 128.35, 128.29, 128.22, 128.03, 127.92, 127.83, 127.62, 126.92, 126.81, 60.06, 56.53, 37.98, 35.12 ppm.

## 9.2 Synthesis of D97 from hydrazone D1

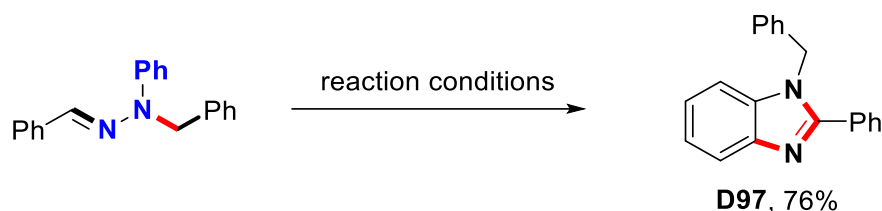

Under the nitrogen, an oven-dried yang-type tube (50 mL volume) was charged with a magnetic stirring bar, **D1** (0.5 mmol),  $\text{Cu}(\text{OTf})_2$  (0.5 mmol) and toluene (2 mL) were added in sequence under magnetic stirring. Then the seal tube was closed tightly with a teflon cap, immersed into a pre-heated metal sand bath (110 °C). After 12 hours the reaction was cooled, a small aliquot of the organic phase was analyzed by GC and GC-MS to monitor product formation, respectively. Purification of the remainder by column chromatography on silica gel gave the corresponding product **D97** (pentane/ethyl acetate = 50/1-5/1) in the reported yield.

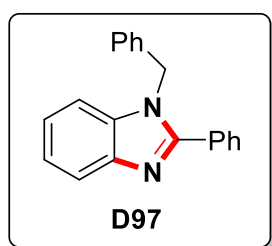

### 1-benzyl-2-phenyl-1H-benzo[d]imidazole<sup>[4]</sup>

The title compound was prepared according to the general procedure and purified by column chromatography to give a yellow solid 108.1 mg, 76% yield. Purification by column chromatography on silica gel (pentane/ethyl ether = 50 : 1 – 5:1).

$^1\text{H}$  NMR (400 MHz, 23.0 °C,  $\text{CDCl}_3$ )  $\delta$  7.91 (d,  $J$  = 8.0 Hz, 1H), 7.70 (d,  $J$  = 7.6 Hz, 2H), 7.47 (d,  $J$  = 7.2 Hz, 3H), 7.36-7.30 (m, 4H), 7.26-7.21 (m, 2H), 7.12 (d,  $J$  = 6.8 Hz, 2H), 5.47 (s, 2H) ppm.

$^{13}\text{C}$  NMR (101 MHz, 23.0 °C,  $\text{CDCl}_3$ )  $\delta$  154.32, 143.01, 136.53, 136.11, 132.72, 130.23, 129.51, 129.22, 128.93, 128.02, 126.11, 123.32, 123.01, 120.12, 110.71, 48.52 ppm.

### 9.3 Synthesis of D98 from hydrazone D1

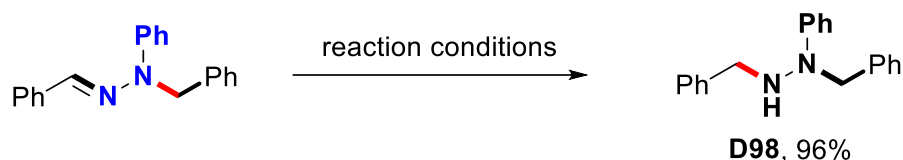

Under the nitrogen, an oven-dried yang-type tube (50 mL volume) was charged with a magnetic stirring bar, **D1** (0.5 mmol), and EtOH (2 mL) were added in sequence under magnetic stirring. Then sodium amalgam (1.0 mmol) was added and the seal tube was closed tightly with a teflon cap, immersed into a pre-cooled metal sand bath (0 °C). After 12 hours the reaction was cooled, a small aliquot of the organic phase was analyzed by GC and GC-MS to monitor product formation, respectively. Purification of the remainder by column chromatography on silica gel gave the corresponding product **D98** (pentane/ethyl acetate = 50/1-5/1) in the reported yield.

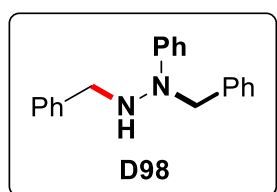

#### 1,2-dibenzyl-1-phenylhydrazine<sup>[5]</sup>

The title compound was prepared according to the general procedure and purified by column chromatography to give a yellow solid 138.4 mg, 96% yield. Purification by column chromatography on silica gel (pentane/ethyl ether = 50 : 1 – 5:1).

$^1\text{H}$  NMR (400 MHz, 23.0 °C,  $\text{CDCl}_3$ )  $\delta$  7.20–7.35 (m, 9H), 7.02 (d,  $J$  = 8.4 Hz, 2H), 6.77–6.88 (m, 4H), 5.68 (s, 1H), 4.77 (s, 2H) ppm.

$^{13}\text{C}$  NMR (101 MHz, 23.0 °C,  $\text{CDCl}_3$ )  $\delta$  151.72, 151.21, 140.52, 129.62, 128.91, 126.53, 126.11, 123.33, 113.23, 65.52 ppm.

### 9.4 Synthesis of D99 from hydrazone D1

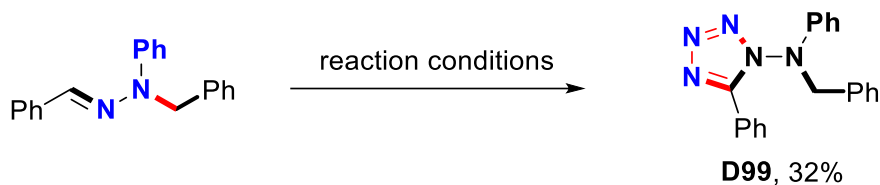

An oven-dried three-necked round-bottomed flask (25 mL) was charged with hydrazone **D1** (0.5 mmol), LiClO<sub>4</sub> (0.5 mmol) and TMSN<sub>3</sub> (2.5 mmol). Then the flask was equipped with a condenser, a reticulated vitreous carbon (RVC) anode (100 PPI, 1 cm x 1 cm x 1 cm), and a platinum plate (1 cm x 1 cm) cathode. After MeOH (2 mL) and MeCN (4 mL) were added, the reaction mixture was stirred and electrolyzed at a constant current of 10 mA under 0 °C for 2 hours (2.5 F). When the reaction was finished, a small aliquot of the organic phase was analyzed by GC and GC-MS to monitor product formation, respectively. Purification of the remainder by column chromatography on silica gel gave the corresponding product **D99** (pentane/ethyl acetate = 50/1-5/1) in the reported yield.

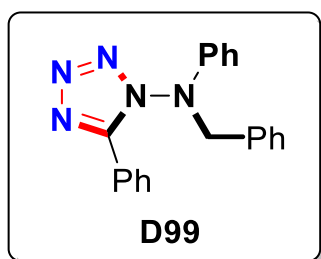

#### *N*-benzyl-*N*,5-diphenyl-1*H*-tetrazol-1-amine<sup>[6]</sup>

The title compound was prepared according to the general procedure and purified by column chromatography to give a yellow solid 52.4 mg, 32% yield. Purification by column chromatography on silica gel (pentane/ethyl ether = 50 : 1 – 5:1).

<sup>1</sup>H NMR (400 MHz, 23.0 °C, CDCl<sub>3</sub>) δ 7.72 (dd, *J* = 8.4, 1.2 Hz, 2H), 7.50 – 7.47 (m, 1H), 7.42 – 7.37 (m, 4H), 7.20 – 7.14 (m, 2H), 7.06 (dd, *J* = 8.4, 6.8 Hz, 2H), 6.99 (ddt, *J* = 8.8, 7.6, 1.2 Hz, 4H), 4.97 (s, 2H) ppm.

<sup>13</sup>C NMR (101 MHz, 23.0 °C, CDCl<sub>3</sub>) δ 153.21, 147.62, 133.11, 131.42, 129.82, 129.21, 128.61, 128.41, 128.40, 124.12, 122.81, 117.00, 60.82 ppm.

#### 9.5. Synthesis of **D102**

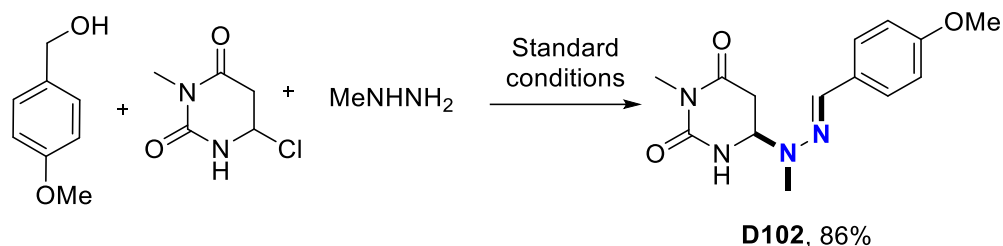

Using a nitrogen-filled glove box, an oven-dried Schlenk Flask (38 mL volume) was charged with a magnetic stirring bar,  $\text{MnBr}(\text{CO})_5$  (1.0 mol%), **L11** (1.2 mol%),  $t\text{BuOK}$  (1.0 mmol),  $\text{PMPCH}_2\text{OH}$  (0.8 mmol),  $\text{MeNHNH}_2$  (0.5 mmol), 6-chloro-3-methyl-2,4-dihydropyrimidine-2,4(1H,3H)-dione (0.5 mmol) (0.7 mmol) and THF (3 mL). Then the Schlenk Flask was closed tightly with a teflon cap, removed from the glove box and immersed into a pre-heated metal bath (100 °C) condensation reflux 24 hours under  $\text{N}_2$  atmosphere. After the reaction was finished, the reaction was analyzed by TLC to monitor product formation. Then a small aliquot of the organic phase was analyzed by GC and GC-MS to monitor product formation. Purification of the remainder by column chromatography on silica gel gave the corresponding product **D102** (pentane/ethyl acetate) in the reported yield.

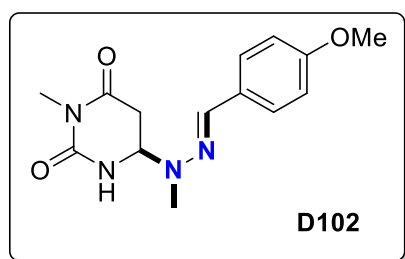

### 6-(2-(4-methoxybenzylidene)-1-methylhydrazinyl)-3-methyl-2,4-dihydropyrimidine-2,4(1H,3H)-dione<sup>[7]</sup>

The title compound was prepared according to the general procedure and purified by column chromatography to give a yellow solid 124.8 mg, 86% yield. Purification by column chromatography on silica gel (pentane/ethyl ether = 50 : 1 – 1:1,  $\text{CH}_3\text{OH}$  5%).  $^1\text{H NMR}$  (400 MHz, 23.0 °C,  $\text{DMSO}-d_6$ )  $\delta$  10.62 (s, 1H), 7.90–7.97 (m, 3H), 6.99 (d,  $J = 8.4$  Hz, 2H), 5.18 (s, 1H), 3.81 (s, 3H), 3.12 (s, 3H), ppm.

### 9.6 Synthesis of Toxoflavin **D103**

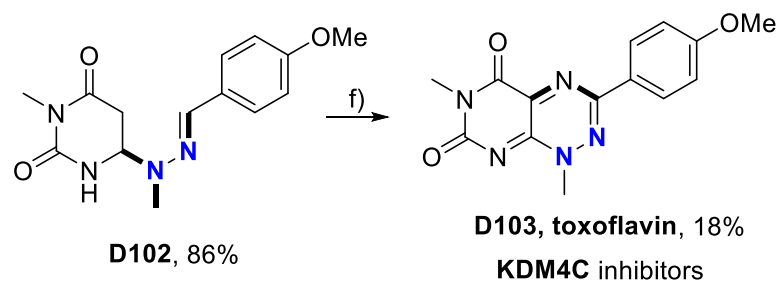

Using a nitrogen-filled glove box, an oven-dried pressure tube (50 mL volume) was charged with a magnetic stirring bar, **D102** (0.5 mmol), CH<sub>3</sub>COOH (4 mL) and H<sub>2</sub>O (0.4 mL) were added in sequence under magnetic stirring. Then NaNO<sub>2</sub> (0.75 mmol) was added the seal tube was closed tightly with a teflon cap, removed from the glove box, immersed into a pre-cooled metal sand bath (0 °C). After 6 hours, the reaction mixture was diluted with water and extracted with DCM. Organic layers were combined, dried over sodium sulphate, filtered and evaporated under reduced pressure to obtain crude product. A small aliquot of the organic phase was analyzed by GC and GC-MS to monitor product formation. Purification of the remainder by column chromatography on silica gel gave the corresponding product **toxoflavin** (MeOH/EtOAc) in the reported yield.

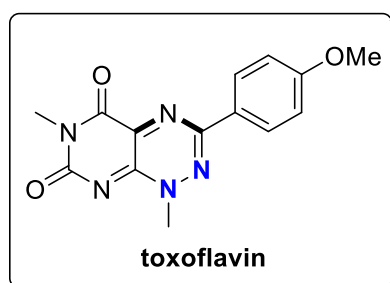

### 3-(4-methoxyphenyl)-1,6-dimethylpyrimido[5,4-e][1,2,4]triazine-5,7(1H,6H)-dione<sup>[7]</sup>

The title compound was prepared according to the general procedure and purified by column chromatography to give a yellow solid 26.9 mg, 18% yield. Purification by column chromatography on silica gel (MeOH/EtOAc = 50 : 1 – 5:1).

<sup>1</sup>H NMR (400 MHz, 23.0 °C, CDCl<sub>3</sub>) δ 8.13 (d, 2H, *J* = 8.4 Hz), 7.14 (d, 2H, *J* = 8.8 Hz), 4.03 (s, 3H), 3.85 (s, 3H), 3.27 (s, 3H) ppm.

<sup>13</sup>C NMR (101 MHz, 23.0 °C, CDCl<sub>3</sub>) δ 162.32, 159.51, 154.52, 151.71, 149.72,

146.81, 128.82, 125.52, 115.21, 55.92, 43.22, 28.73 ppm.

## 9. References

- [1] C. Zhang, H. Zhao, Z. Li, Z. Liang, S. Qi, M. Cai, S. Zhang, X. Jia, G. Zhang and M. -L. Hu, *Chem. Commun.*, 2020, **56**, 9521-9524.
- [2] a) J.-R. Hu, W.-J. Zhang and D.-G. Zheng, *Tetrahedron*, 2013, **69**, 9865 – 9869; b) M. Taddei, M. G. Mura, S. Rajamäki, L. De Luca and P A. orcheddu, *Adv. Synth. Catal.*, 2013, **355**, 3002 – 3013.
- [3] M. Zhang, Y. Duan, W. Li, P. Xu, J. Cheng, S. Yu and C. Zhu, *Org. Lett*, 2016, **18**, 5356 – 5359.
- [4] M. M. Guru, M. A. Ali and T. Punniyamurthy, *J. Org. Chem.* 2011, **76**, 5295–5308.
- [5] Y. Zhang, Q. Tang and M. Luo, *Org. Biomol. Chem.*, 2011, **9**, 4977-4982
- [6] Z. Ye, F. Wang, Y. Li and F. Zhang, *Green Chem.*, 2018, **20**, 5271-5275.
- [7] V. Letfus, D. Jelić, A. Bokulić, A. Petrinić and G. Koštrun, *Bioorgan. Med. Chem.*, 2020, **28**, 115128.

## 10. NMR Spectra



2023-06-01 yy0035 616-11-4

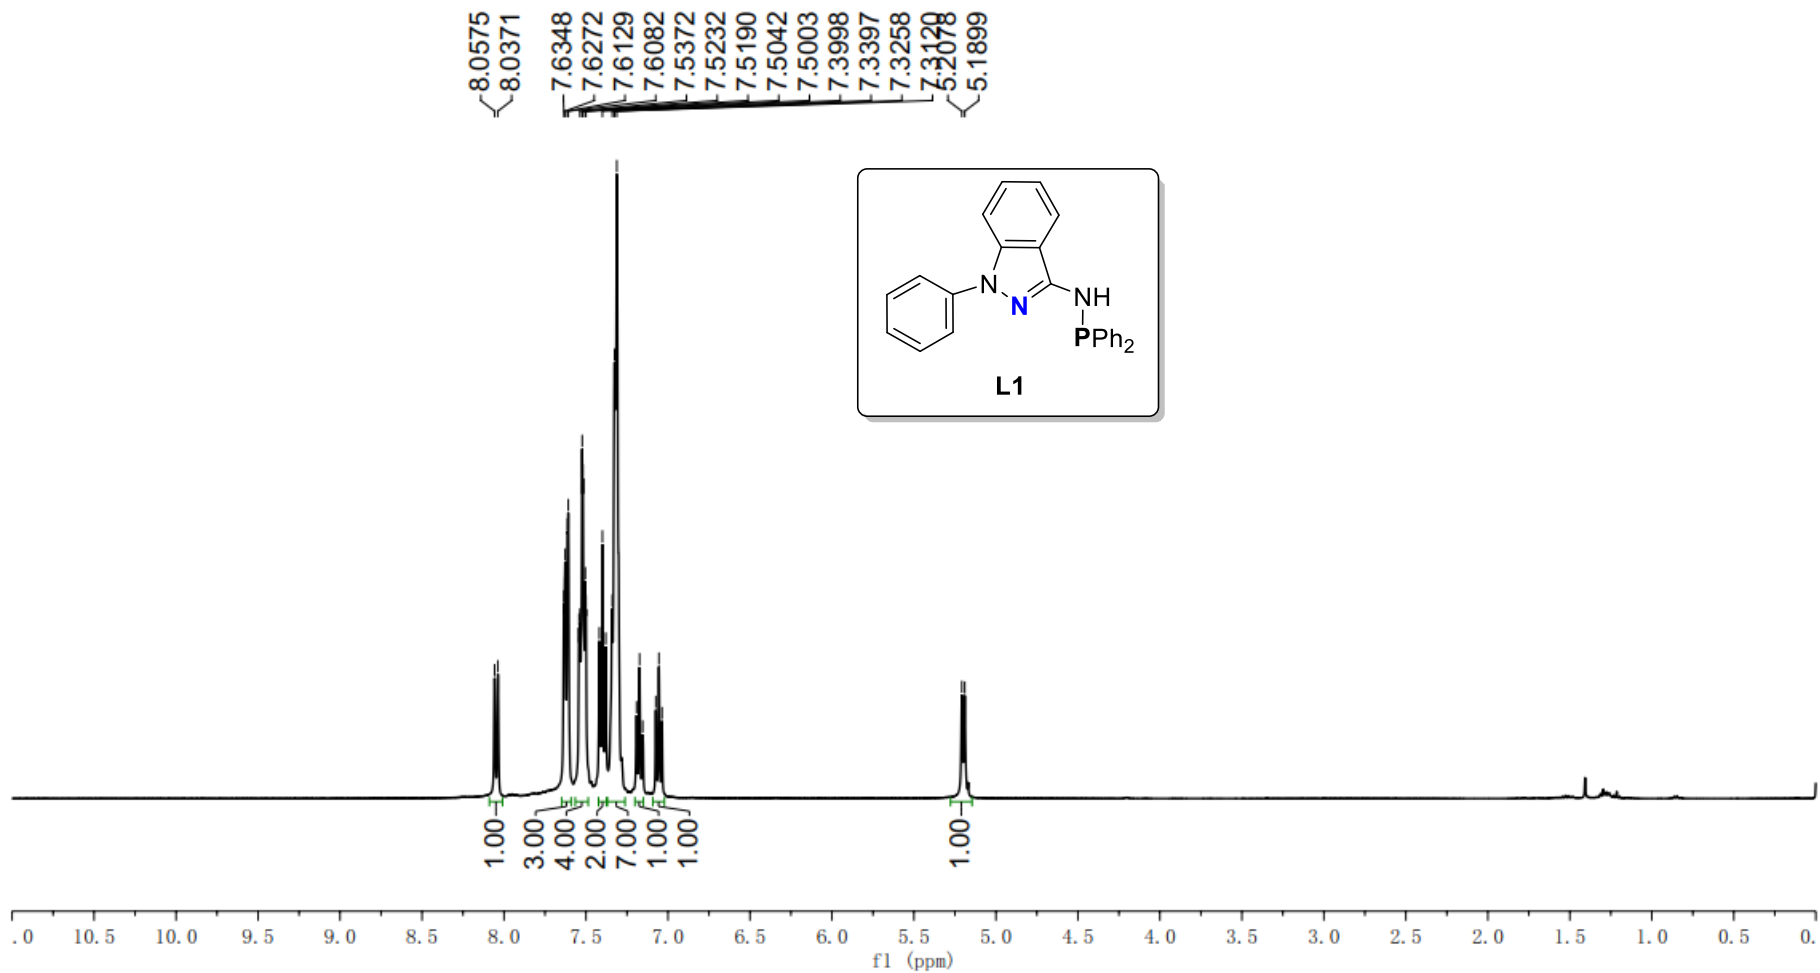

2023-06-02 yy0010 616-11-4

148.98  
148.79  
140.35  
140.33  
140.07  
131.27  
131.06  
129.14  
129.10  
128.49  
128.43  
121.64  
110.94

77.32  
77.00  
76.68

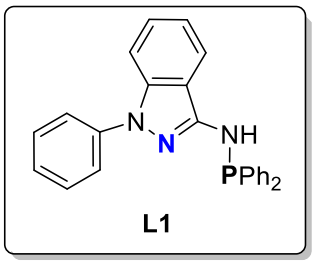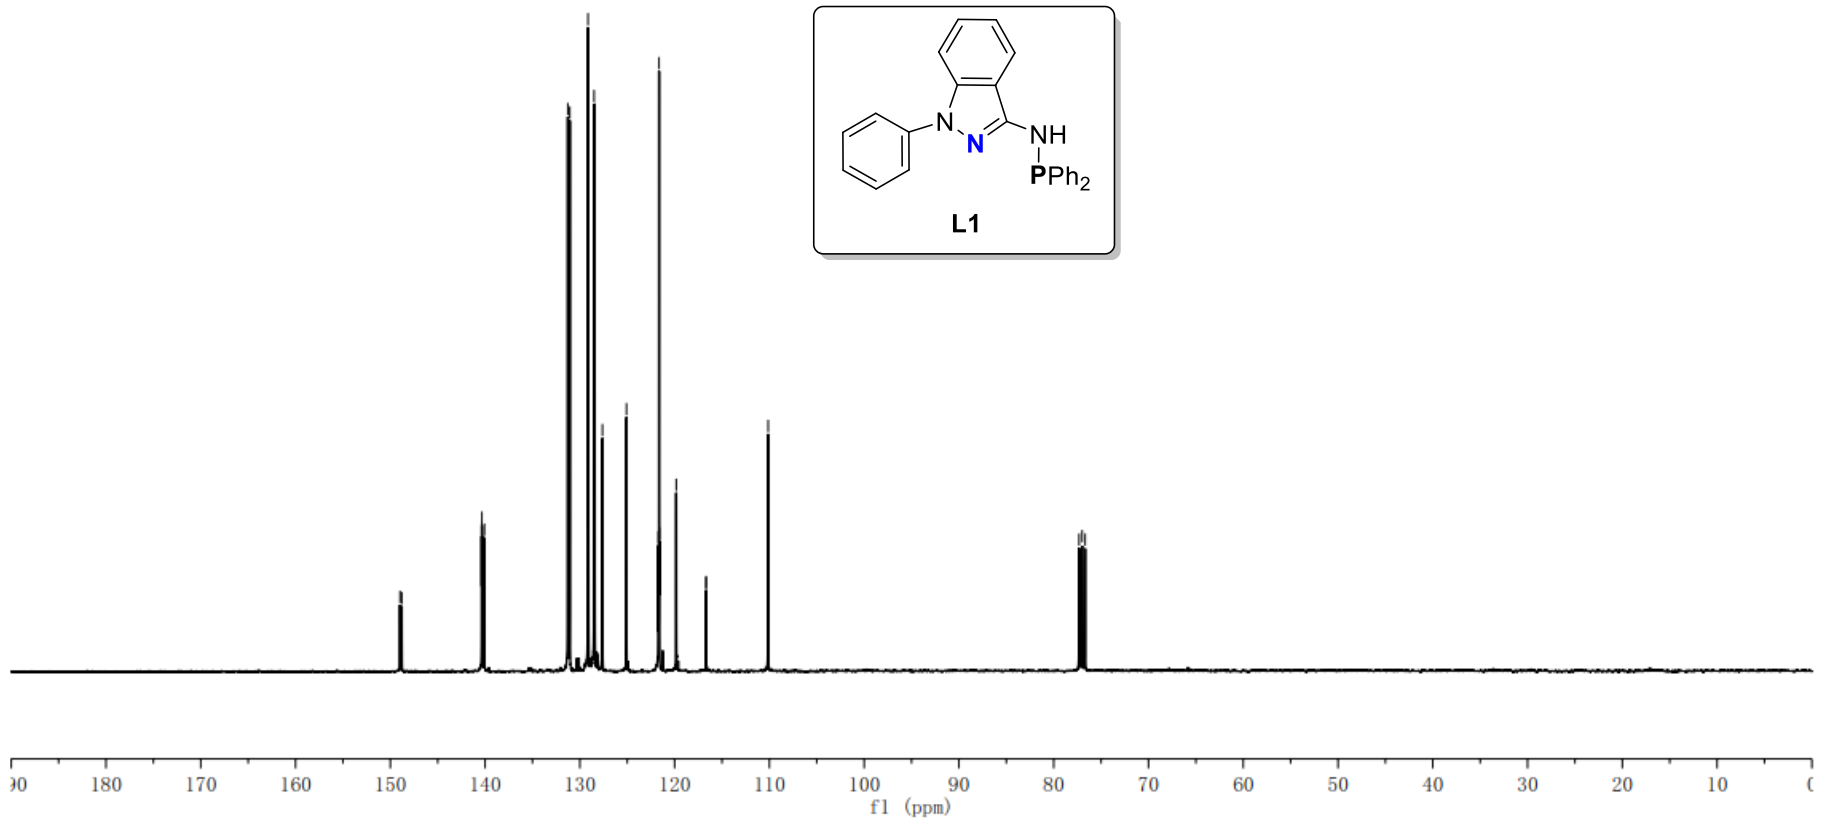

2023-06-02 yy0010 616-11-4

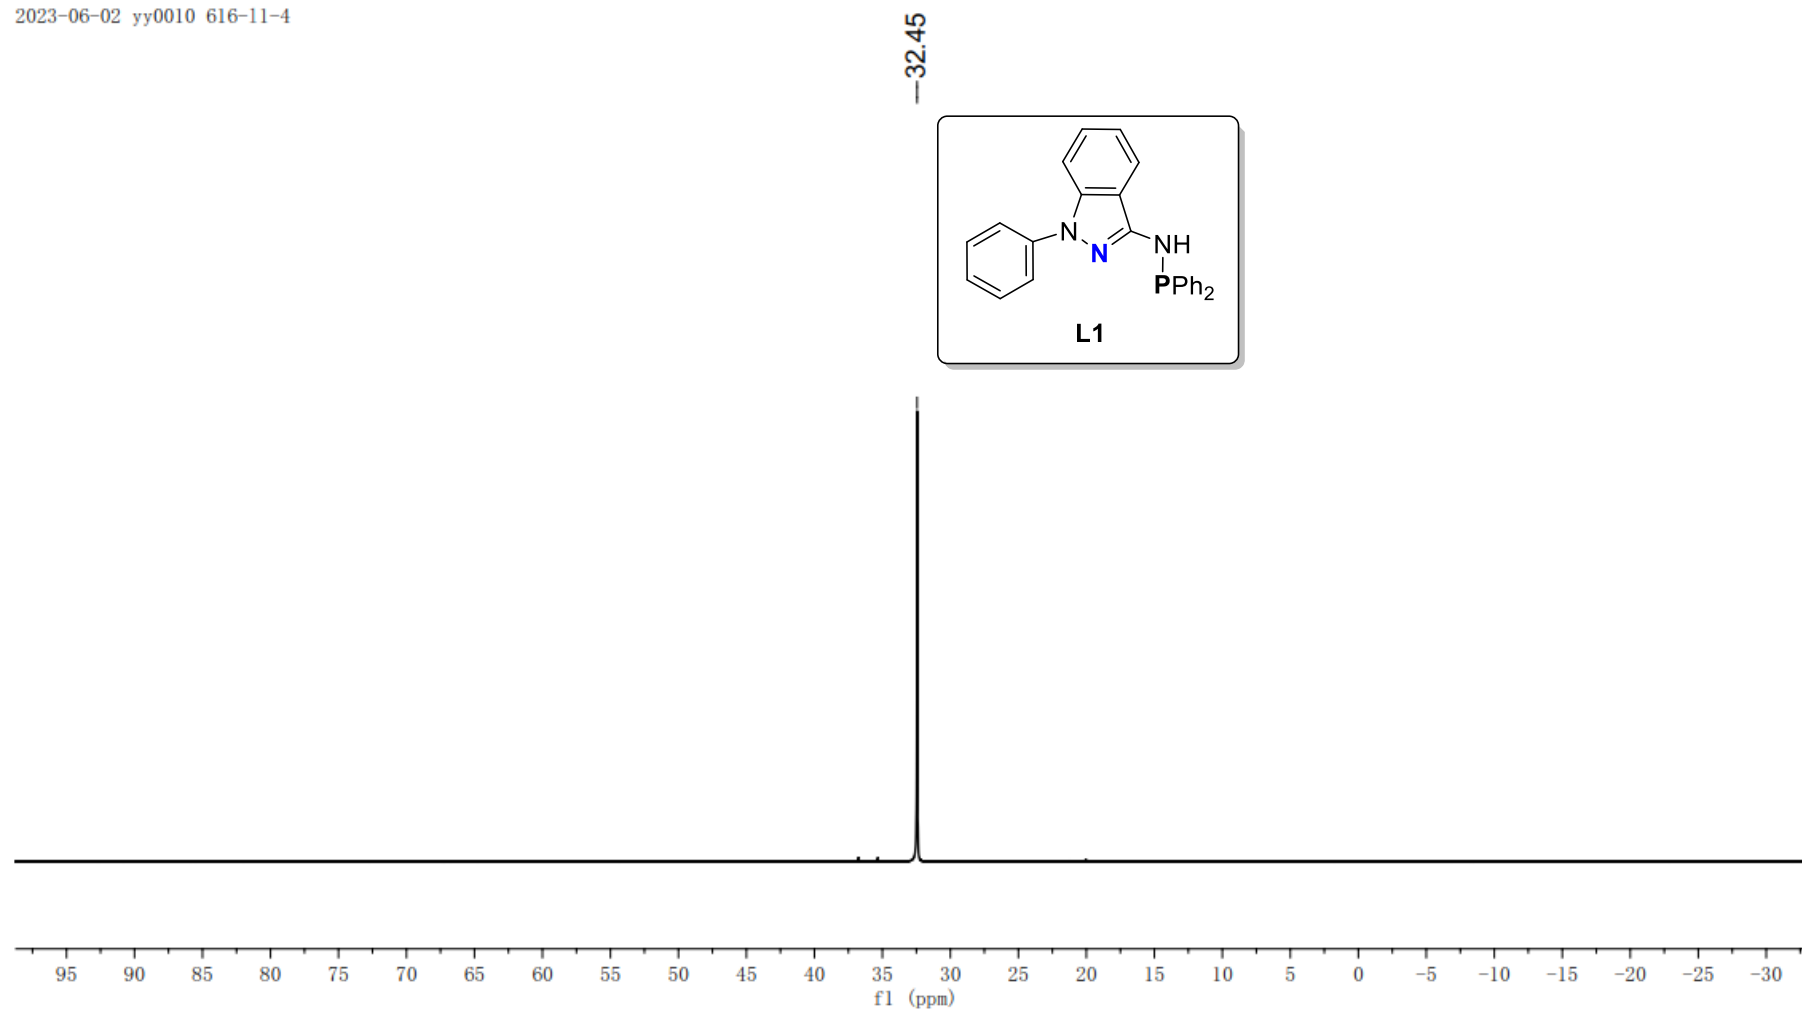

2023-02-27 yy0007 616-lqq-12-2

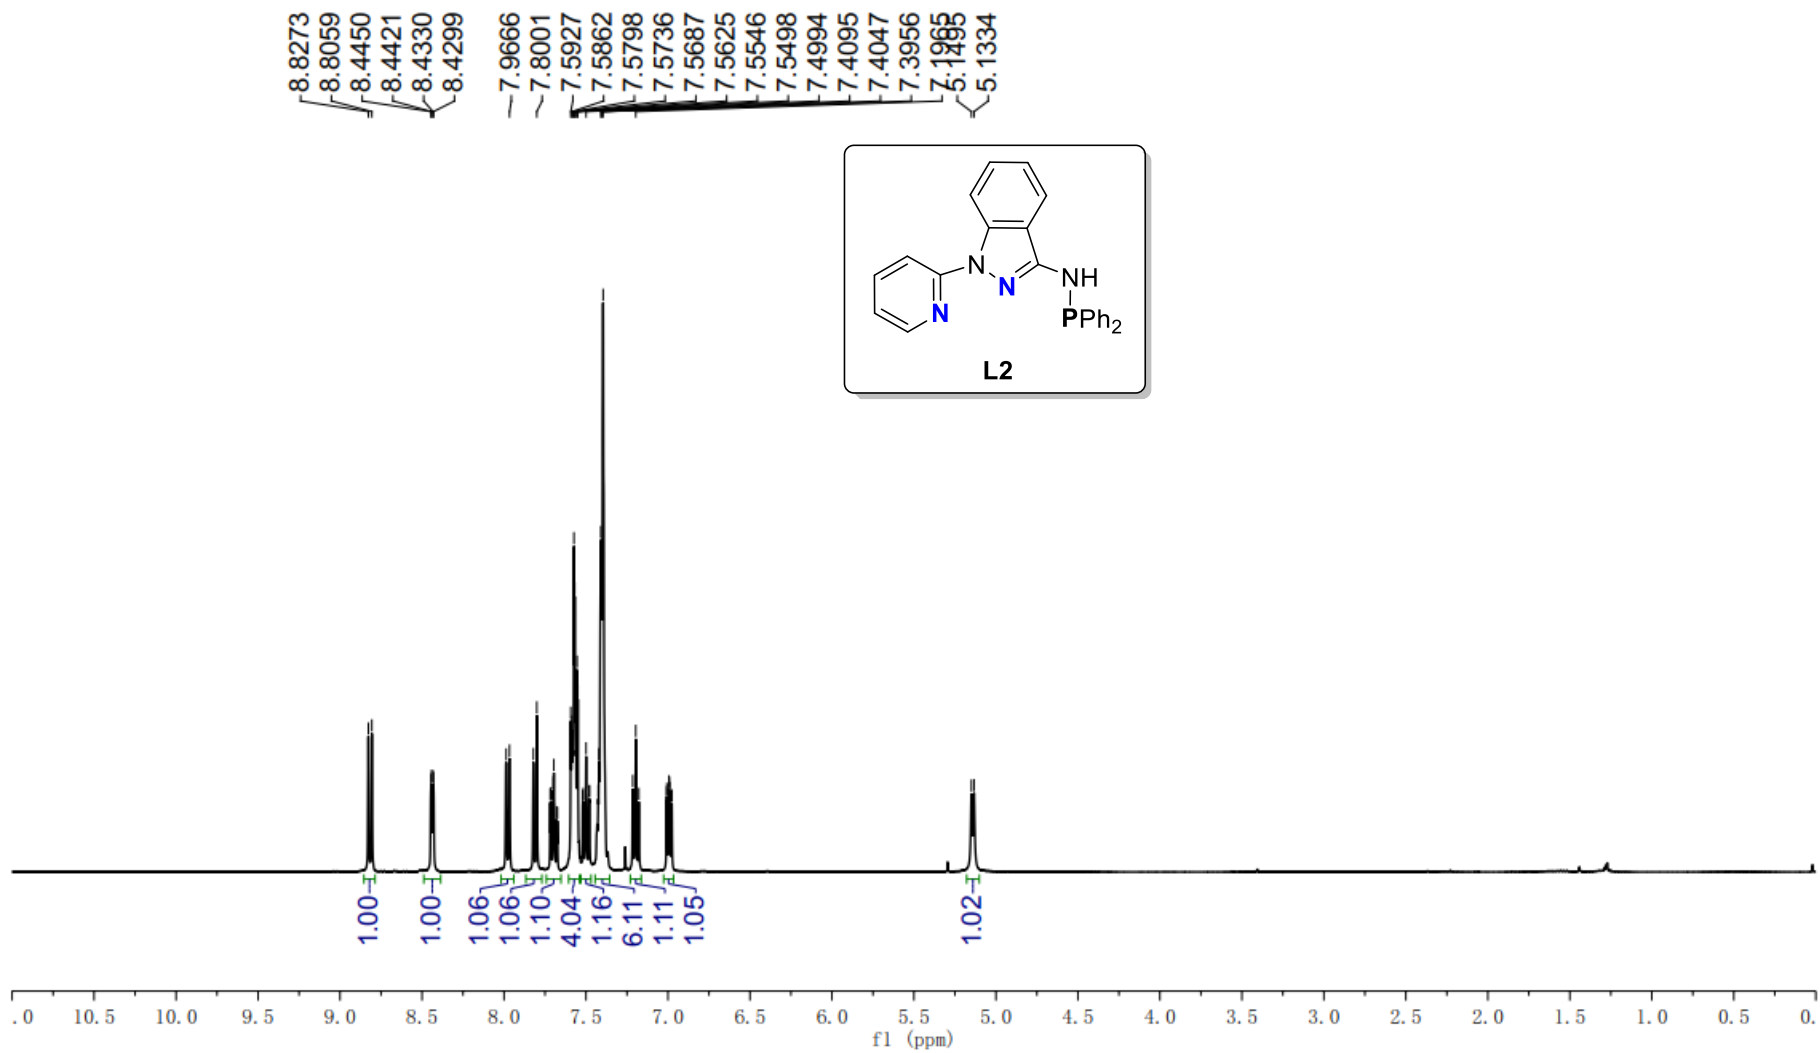

2023-2-28 yy0011-616-12

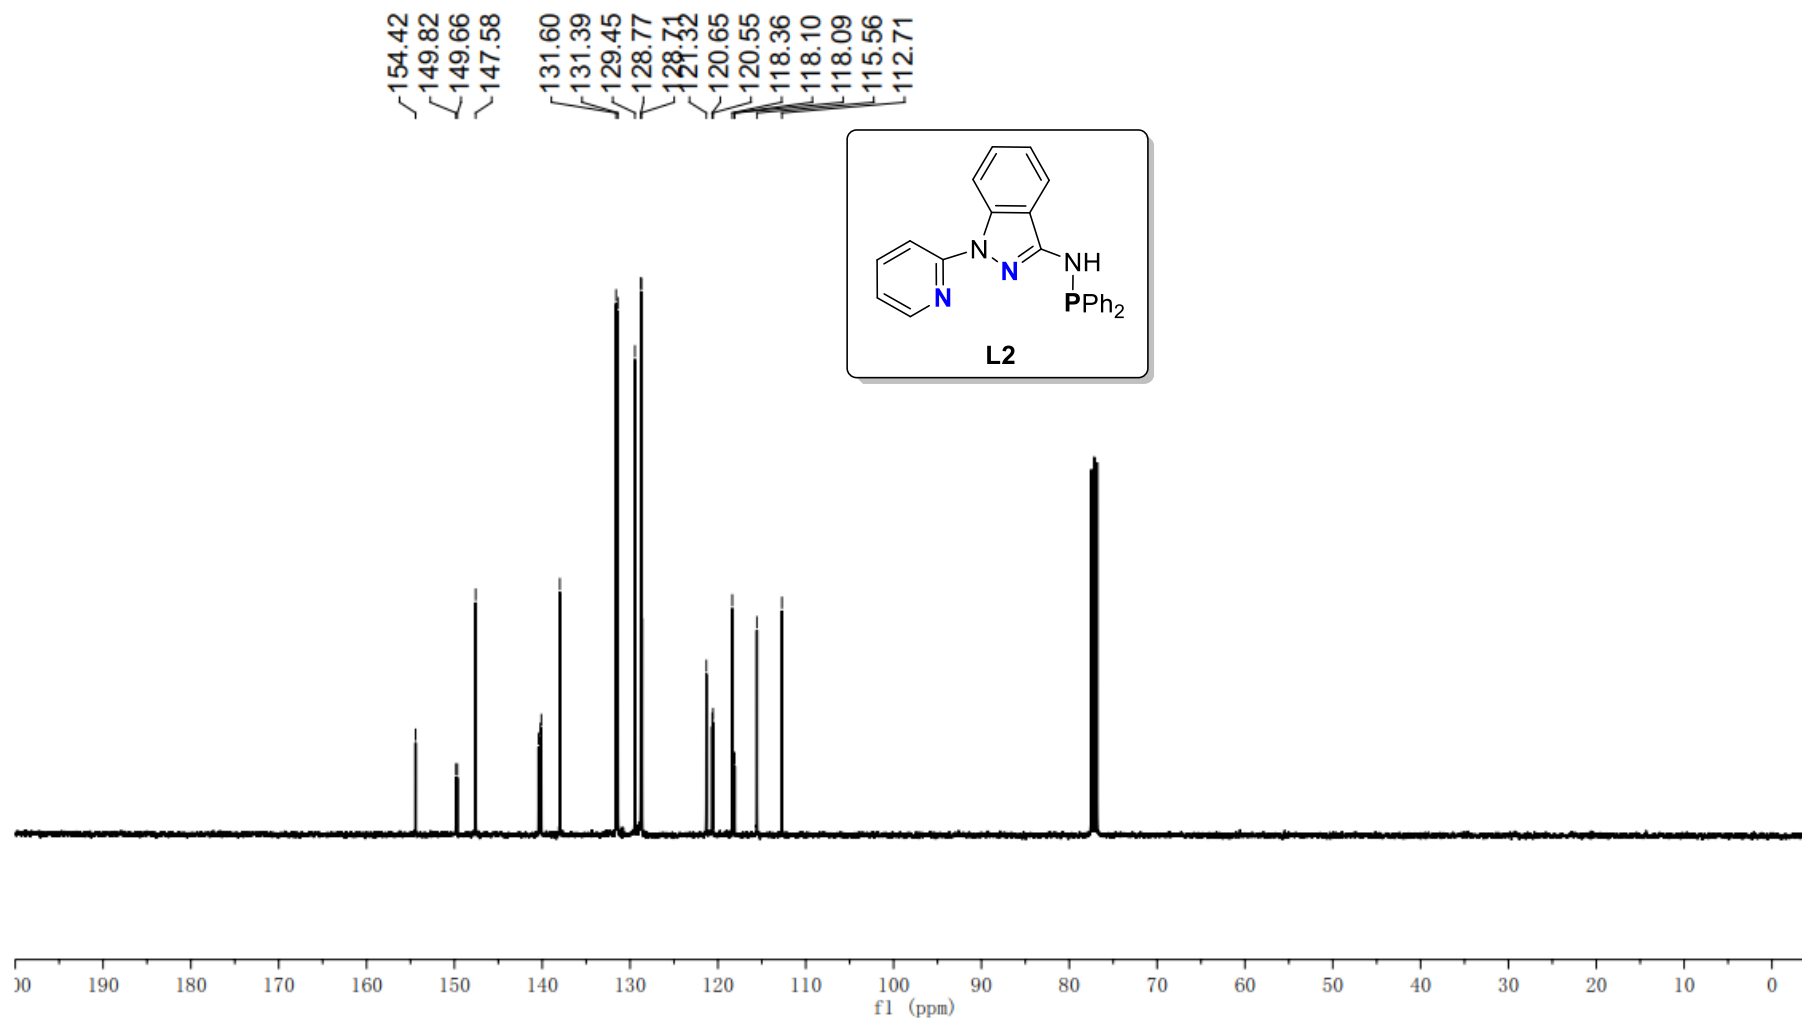

2023-2-28 yy0011-616-12

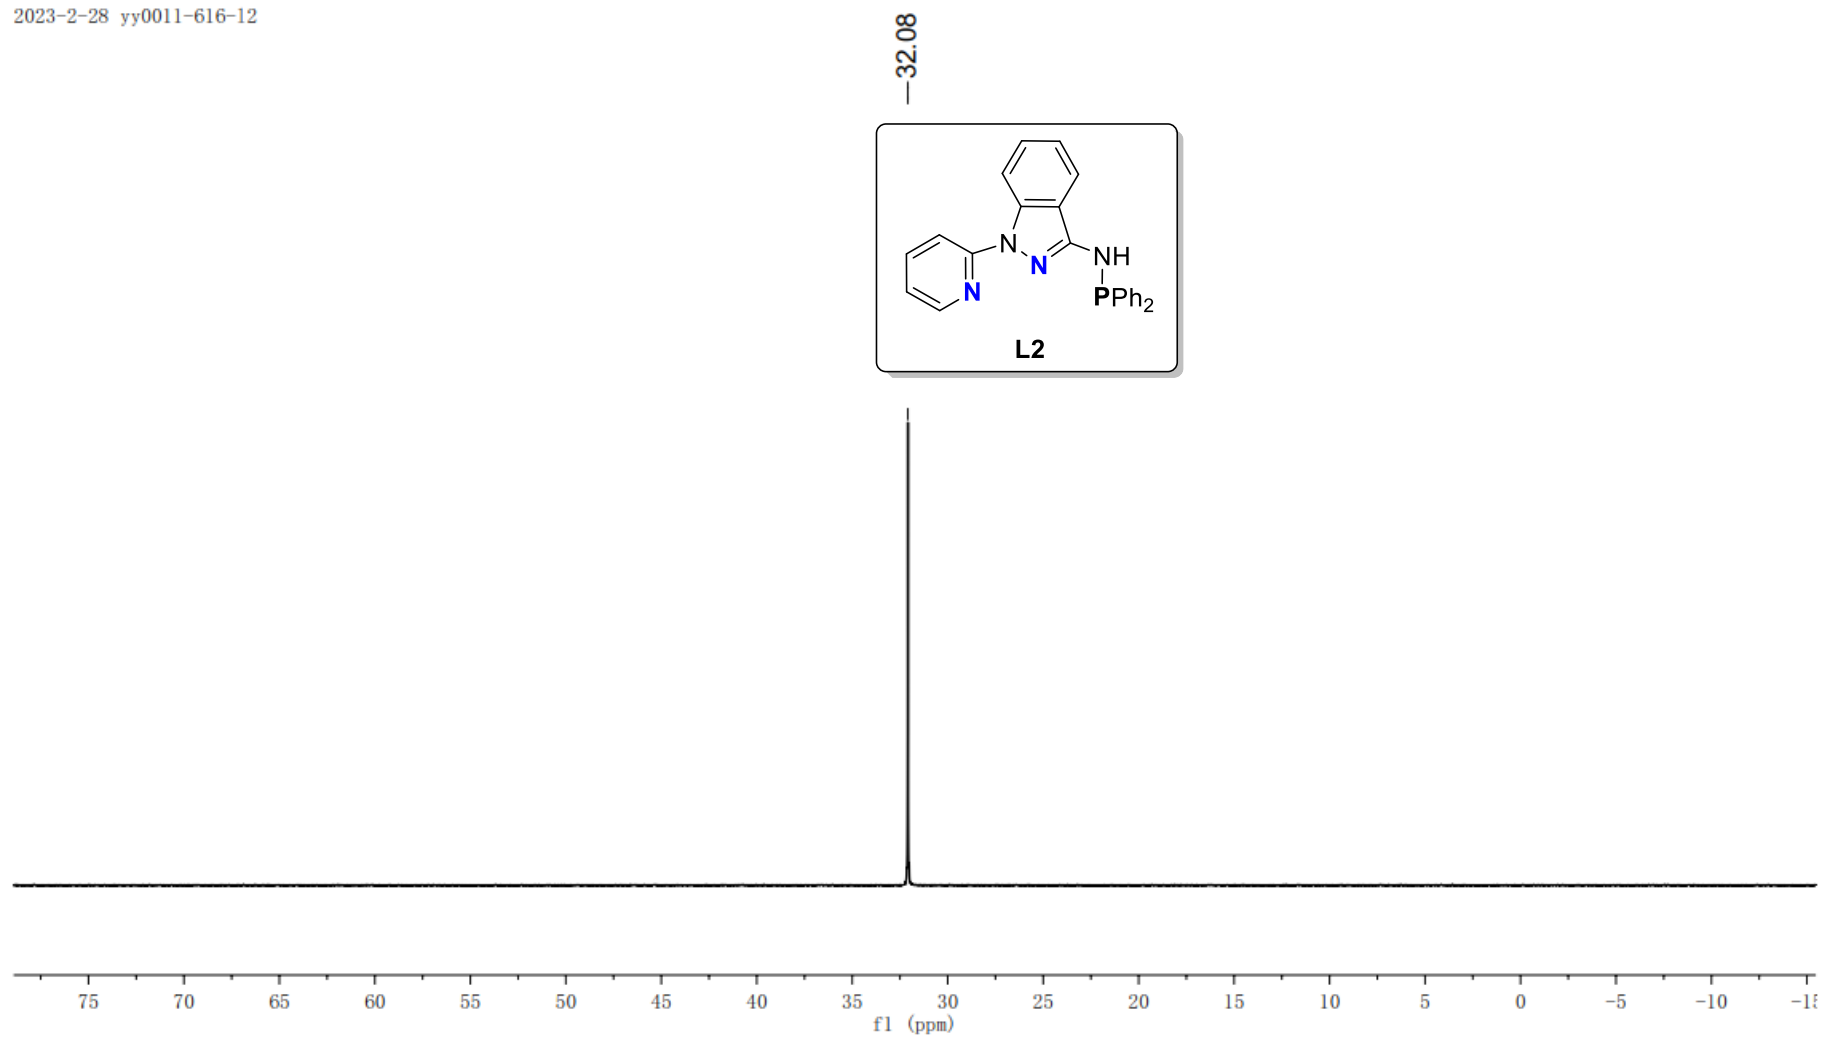

S110

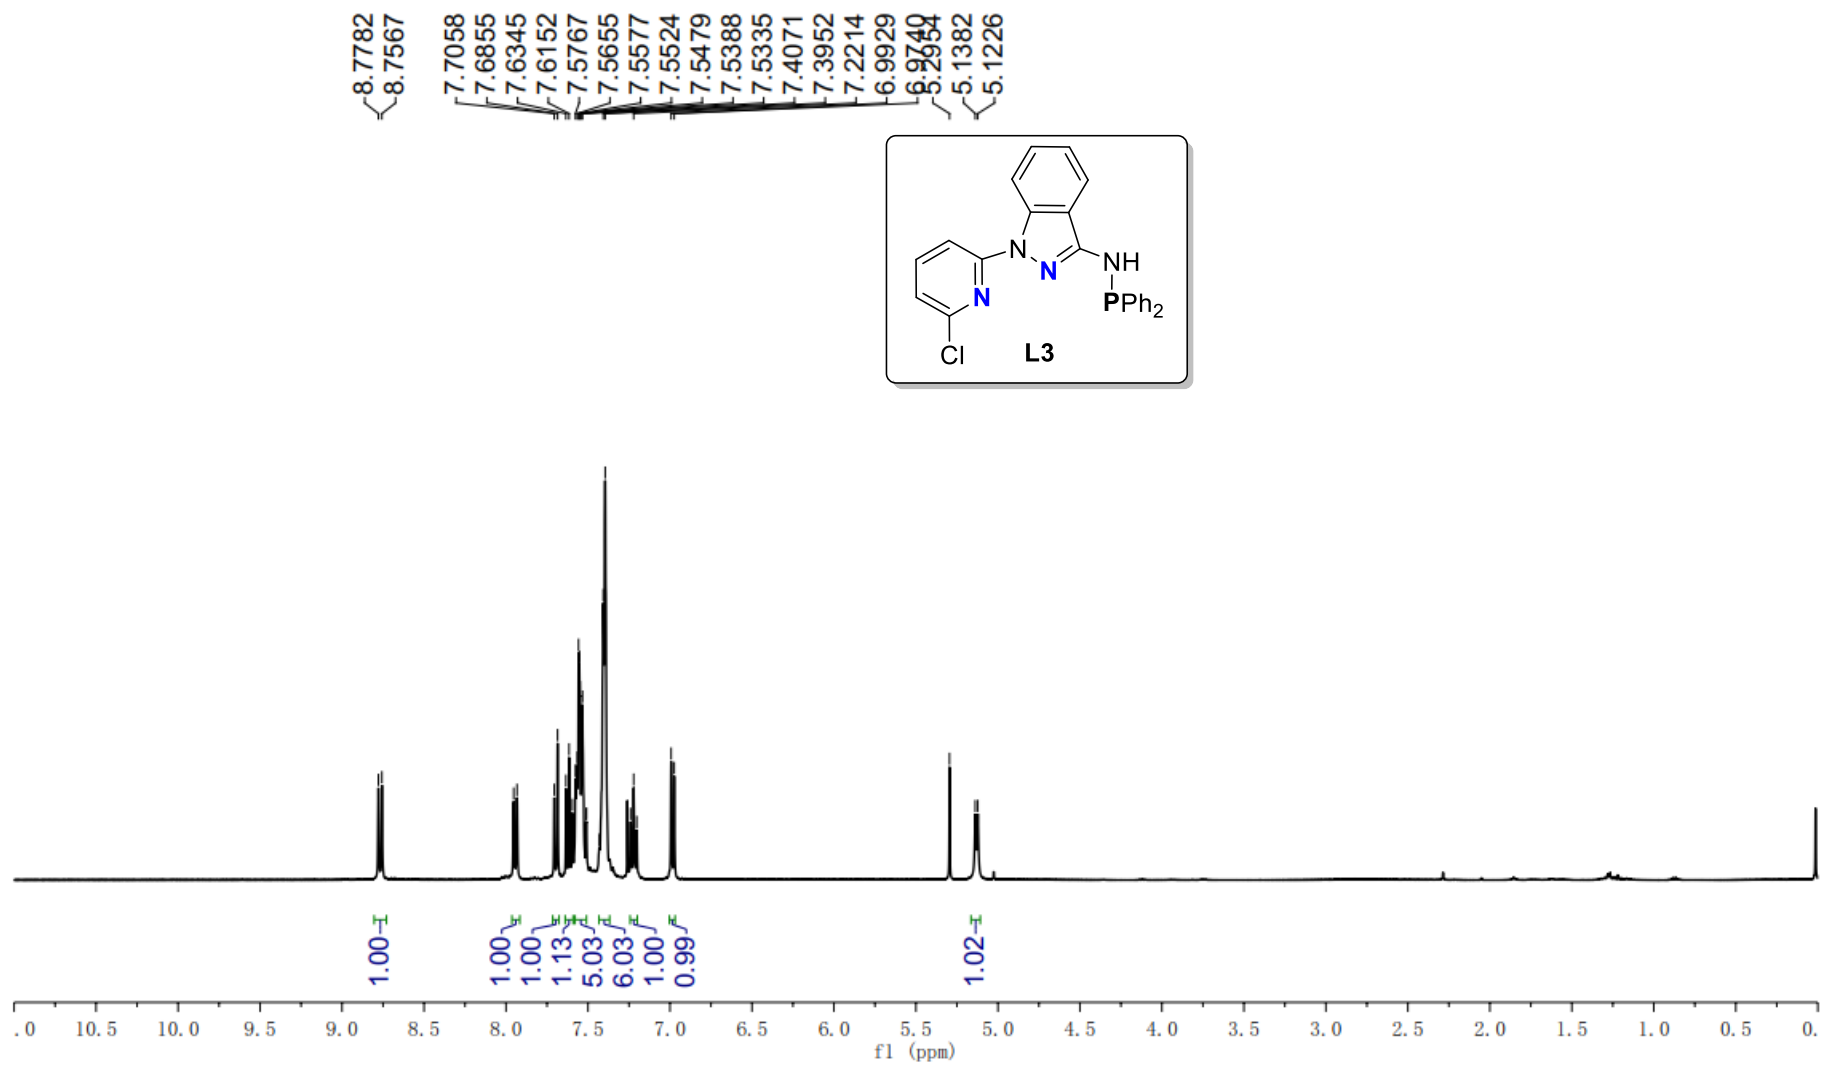

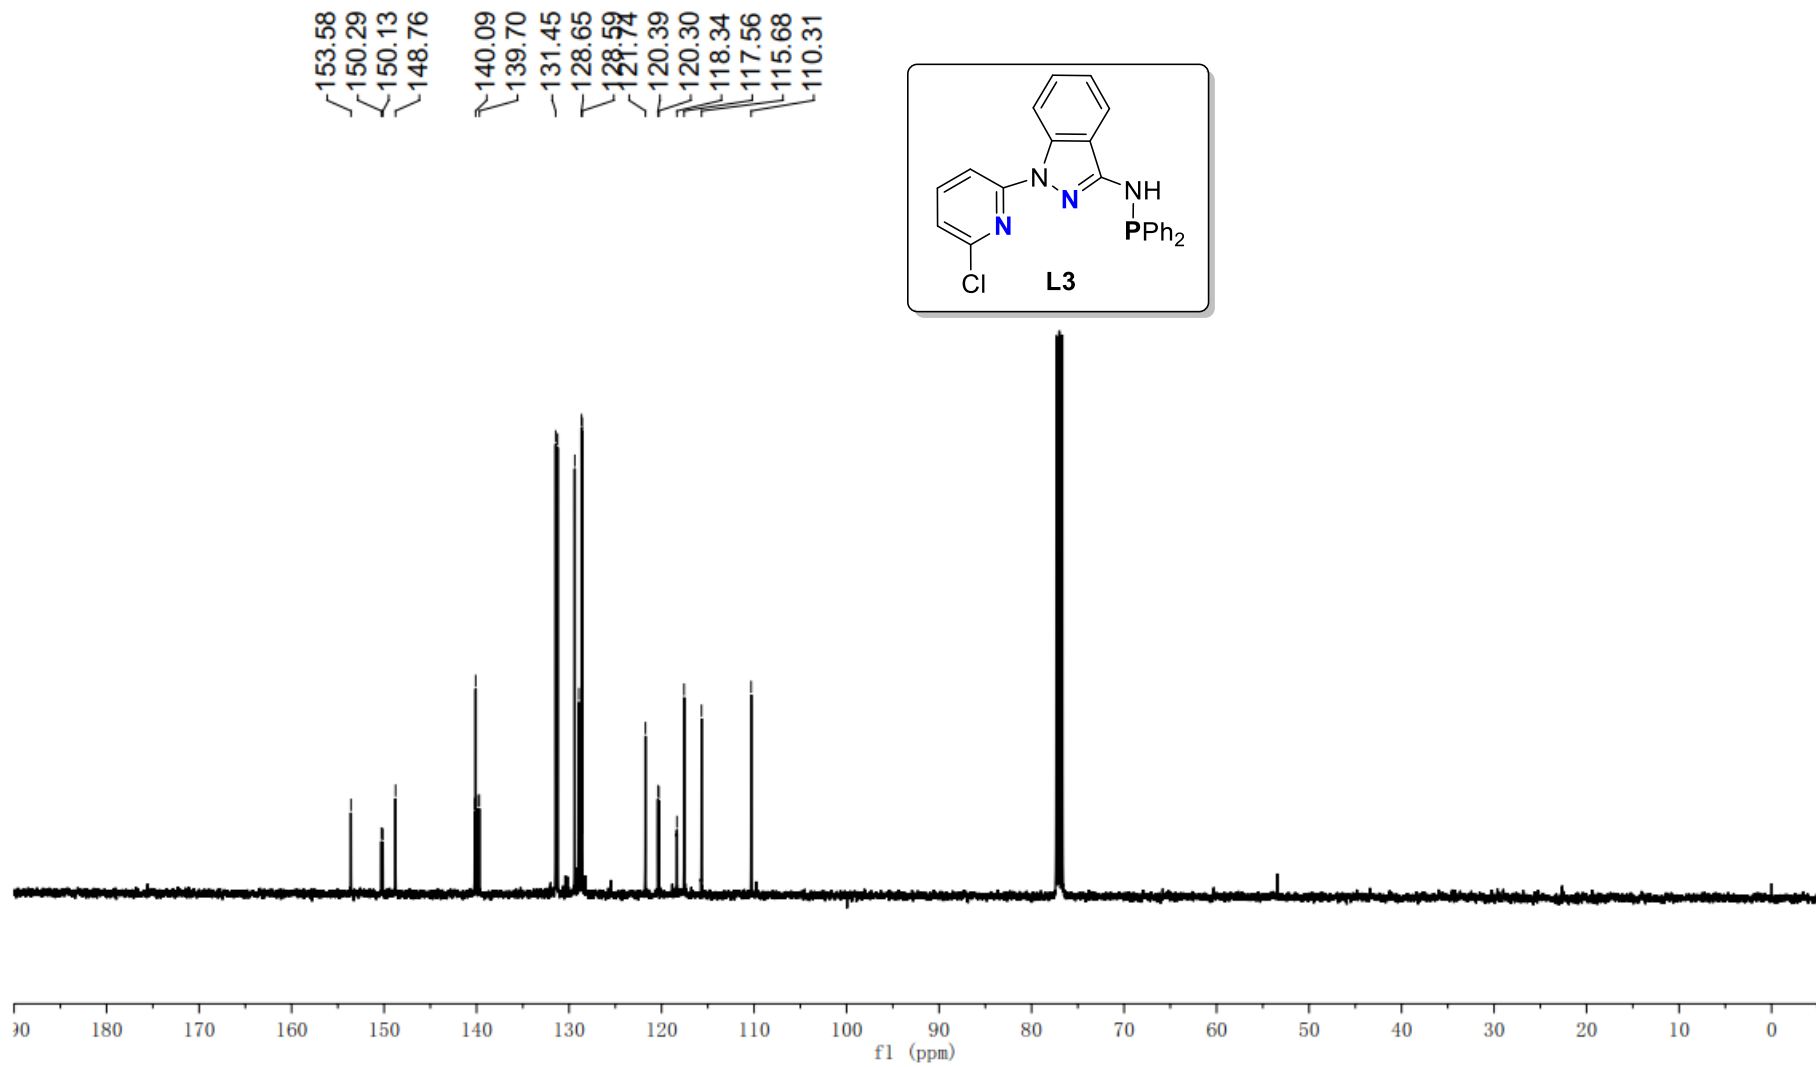



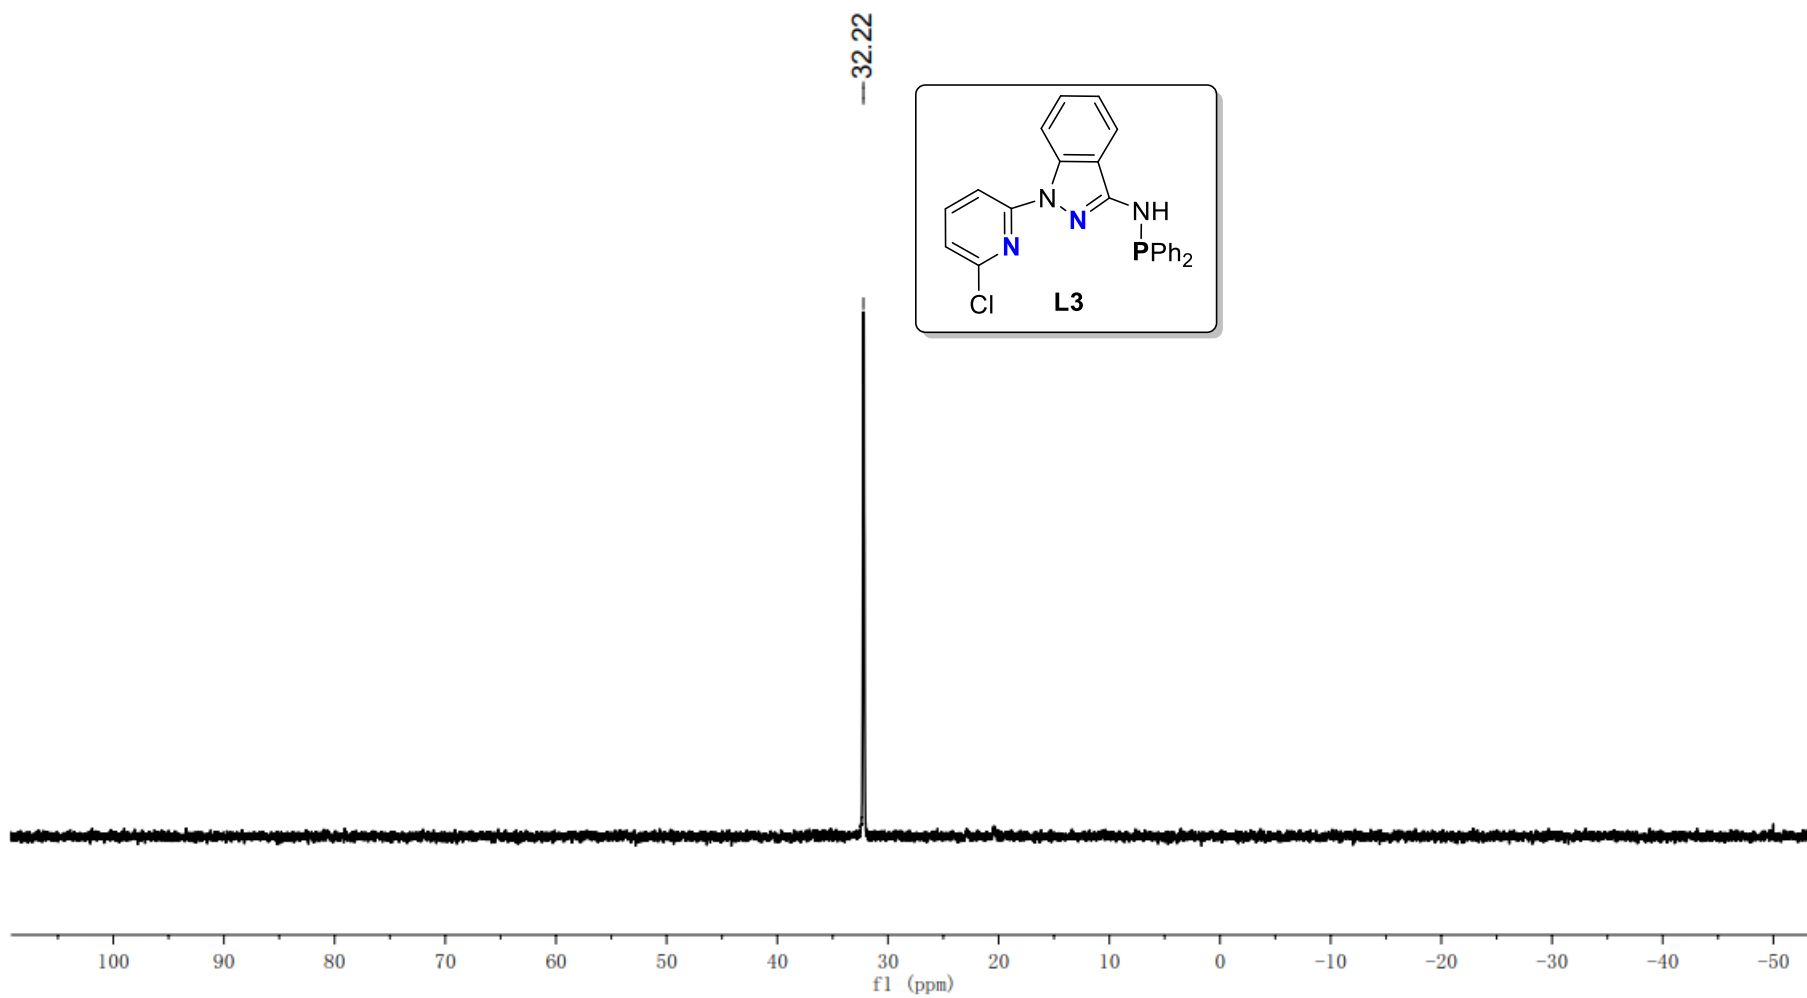

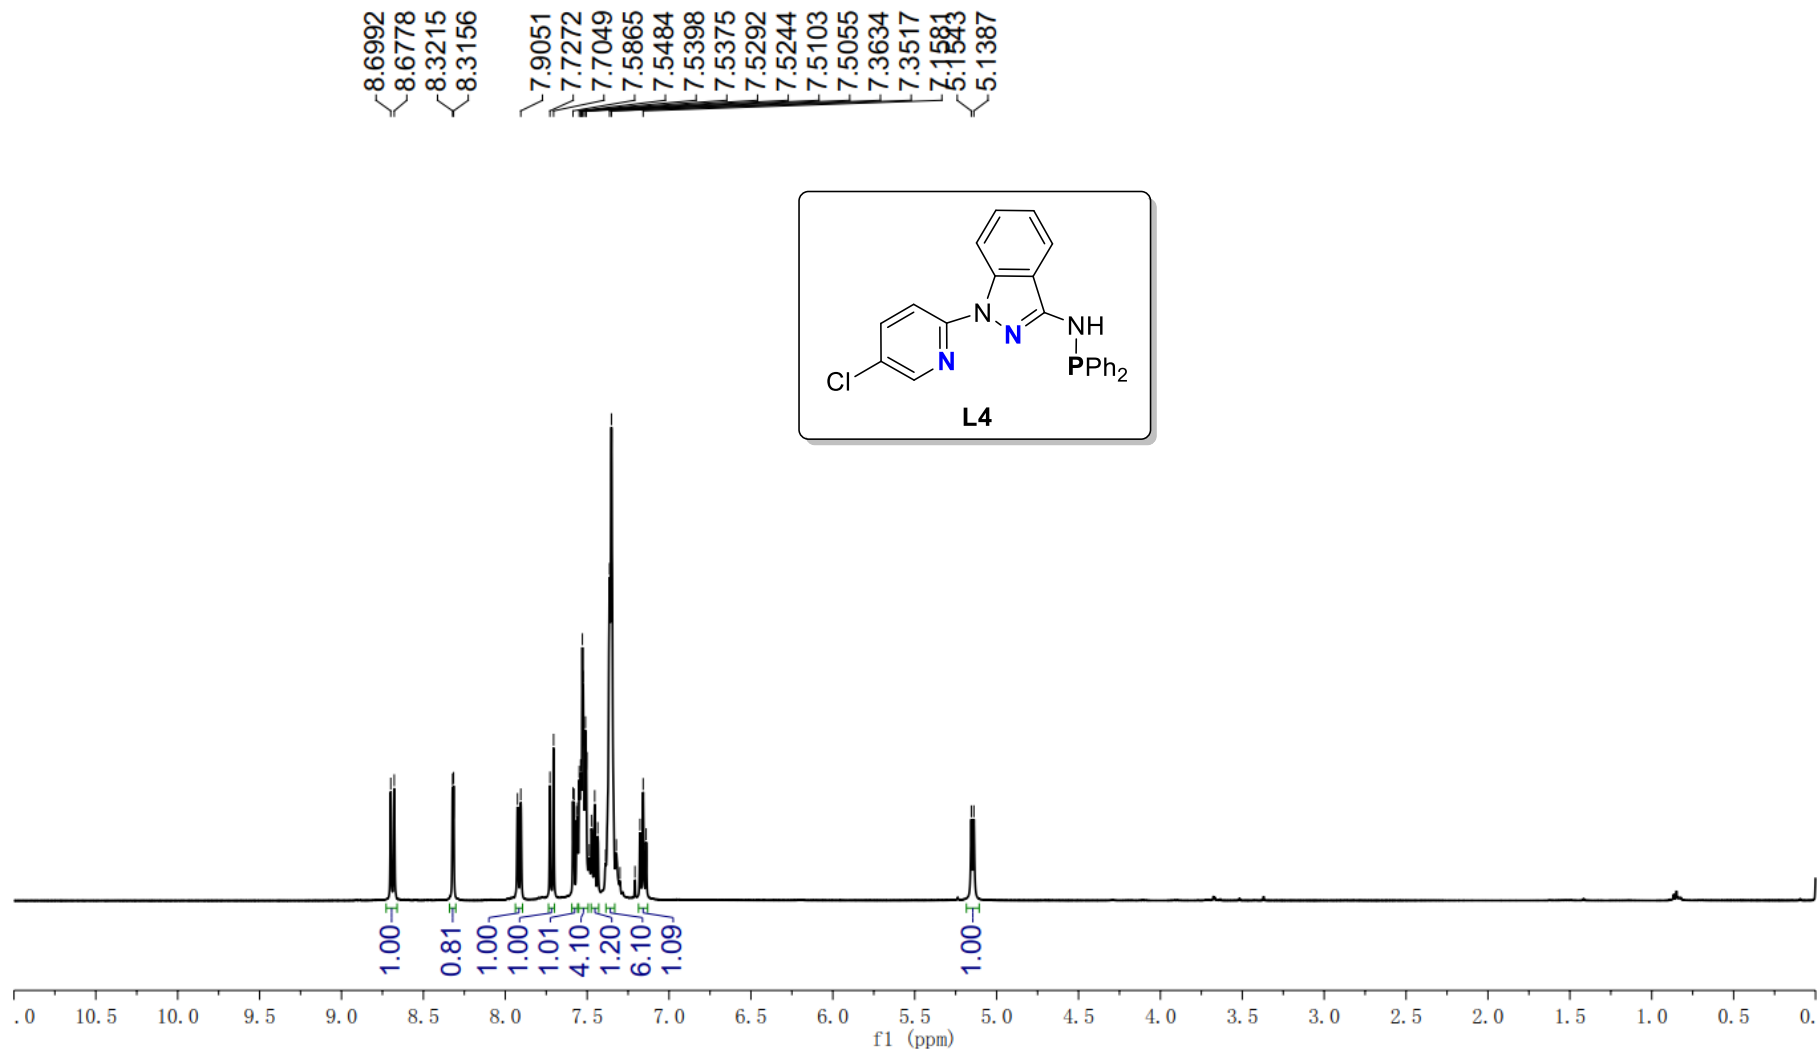

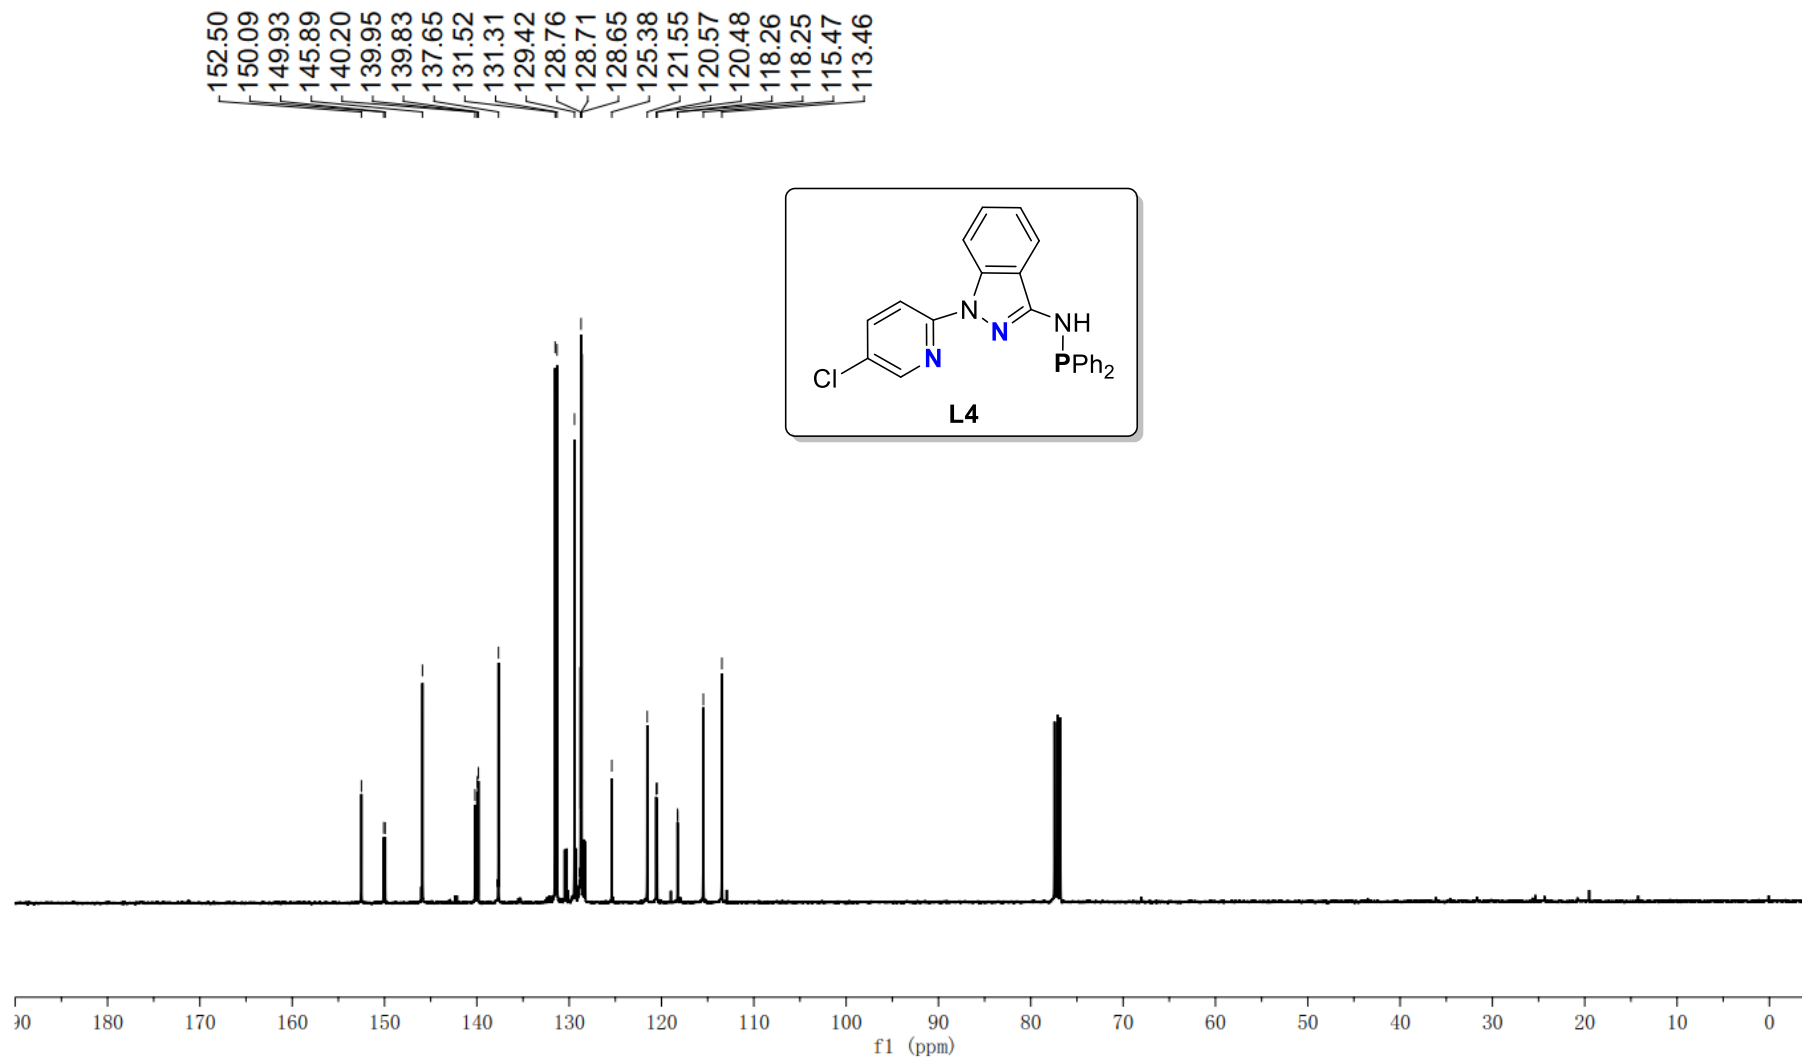

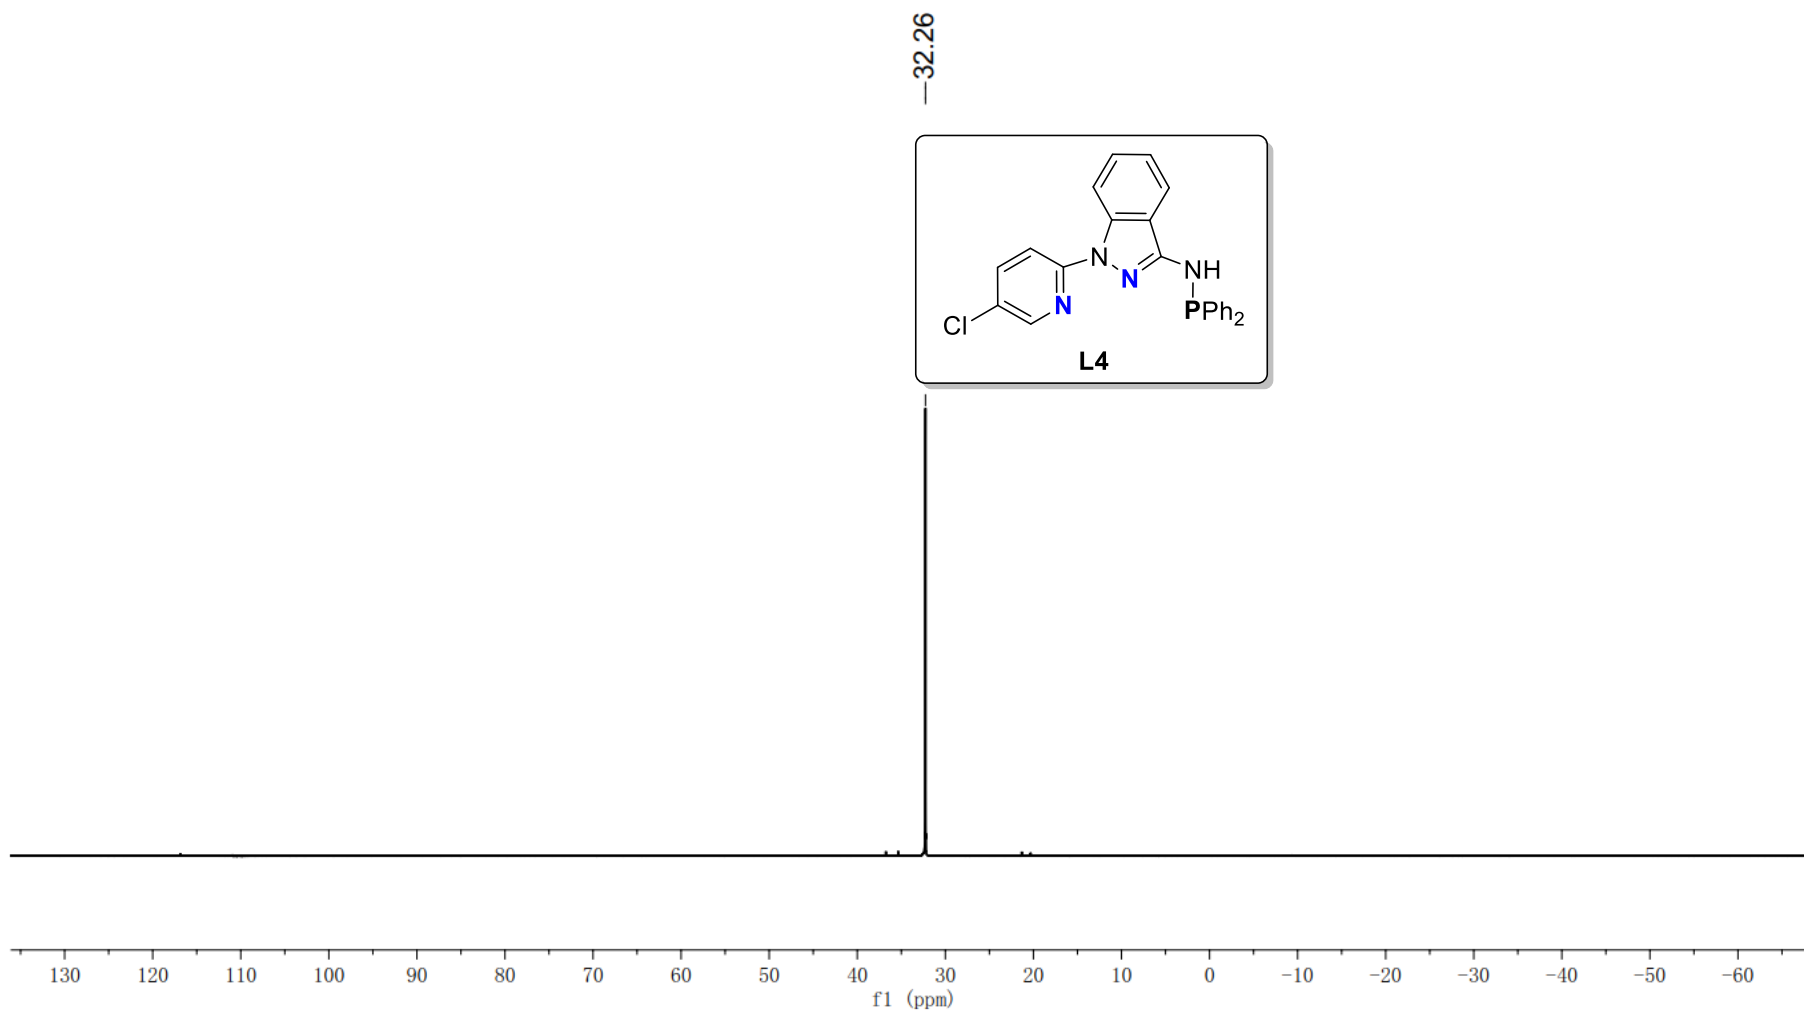

2023-7-21 yy0025 616-1qq1

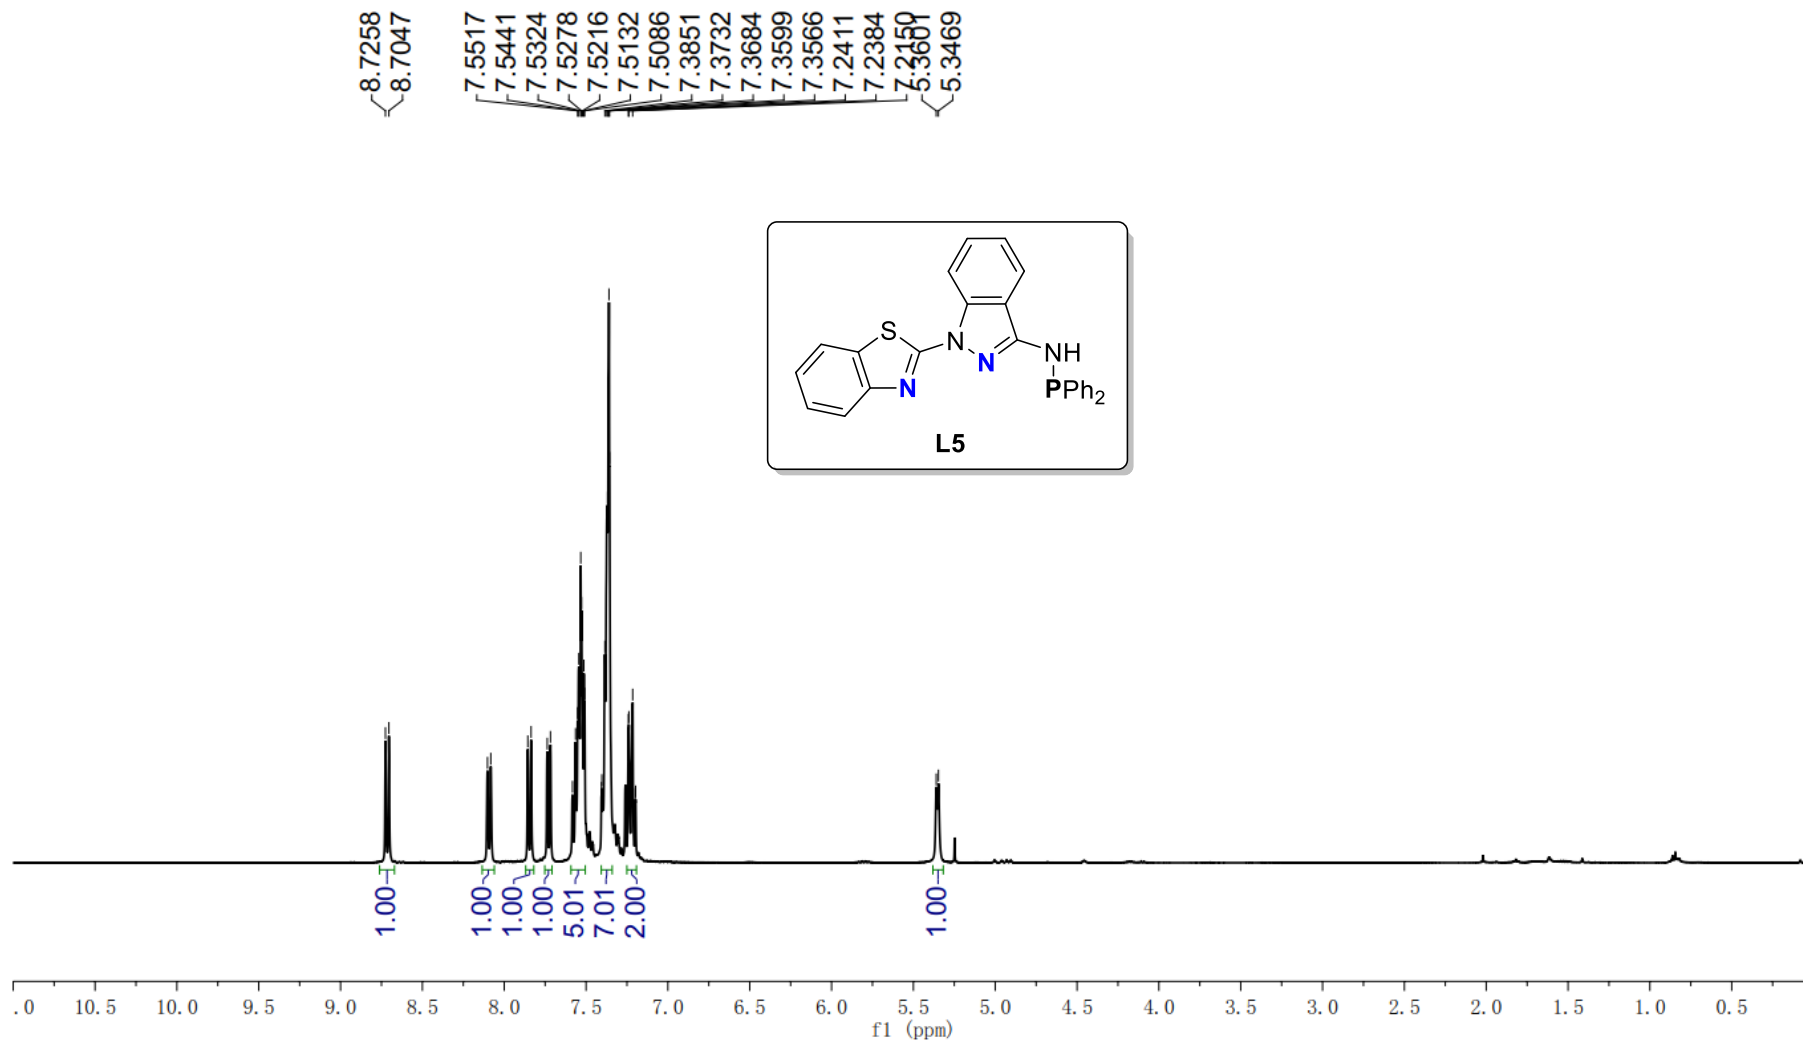

2023-07-23 yy0005 616 -1qq-14-2

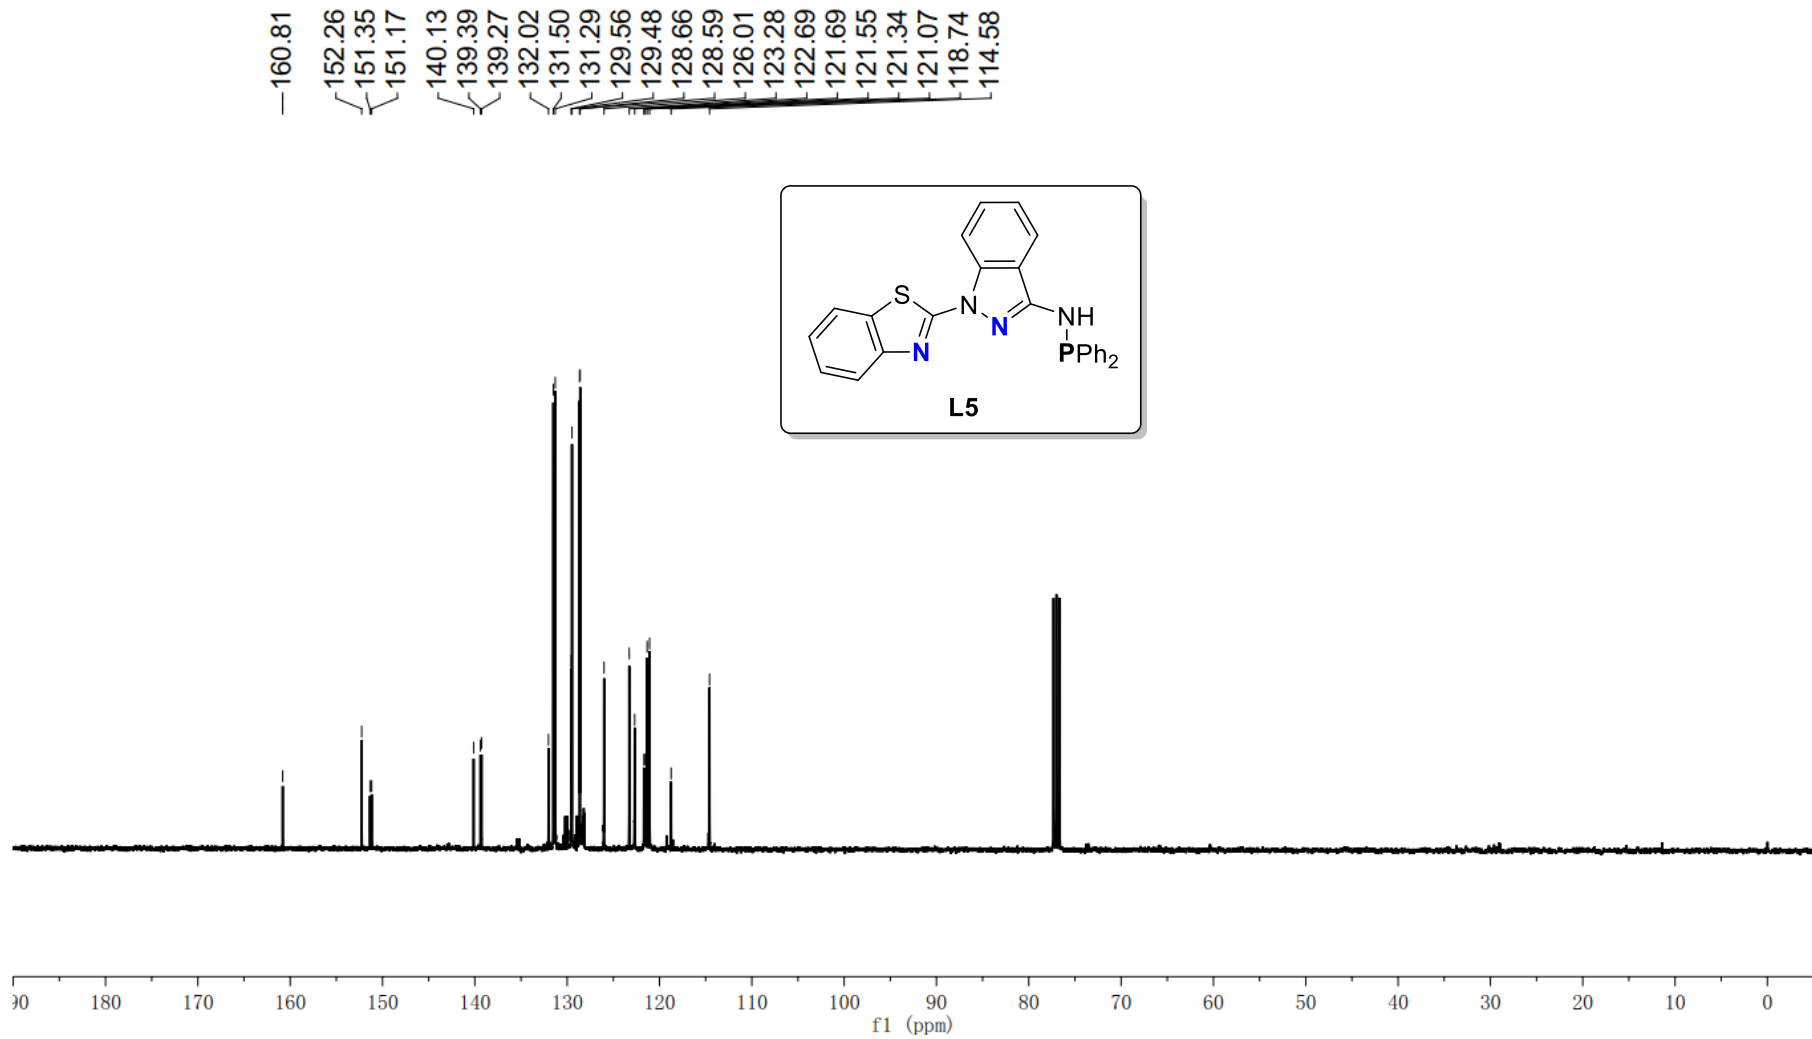

2023-07-23 yy0005 616 -1qq-14-2

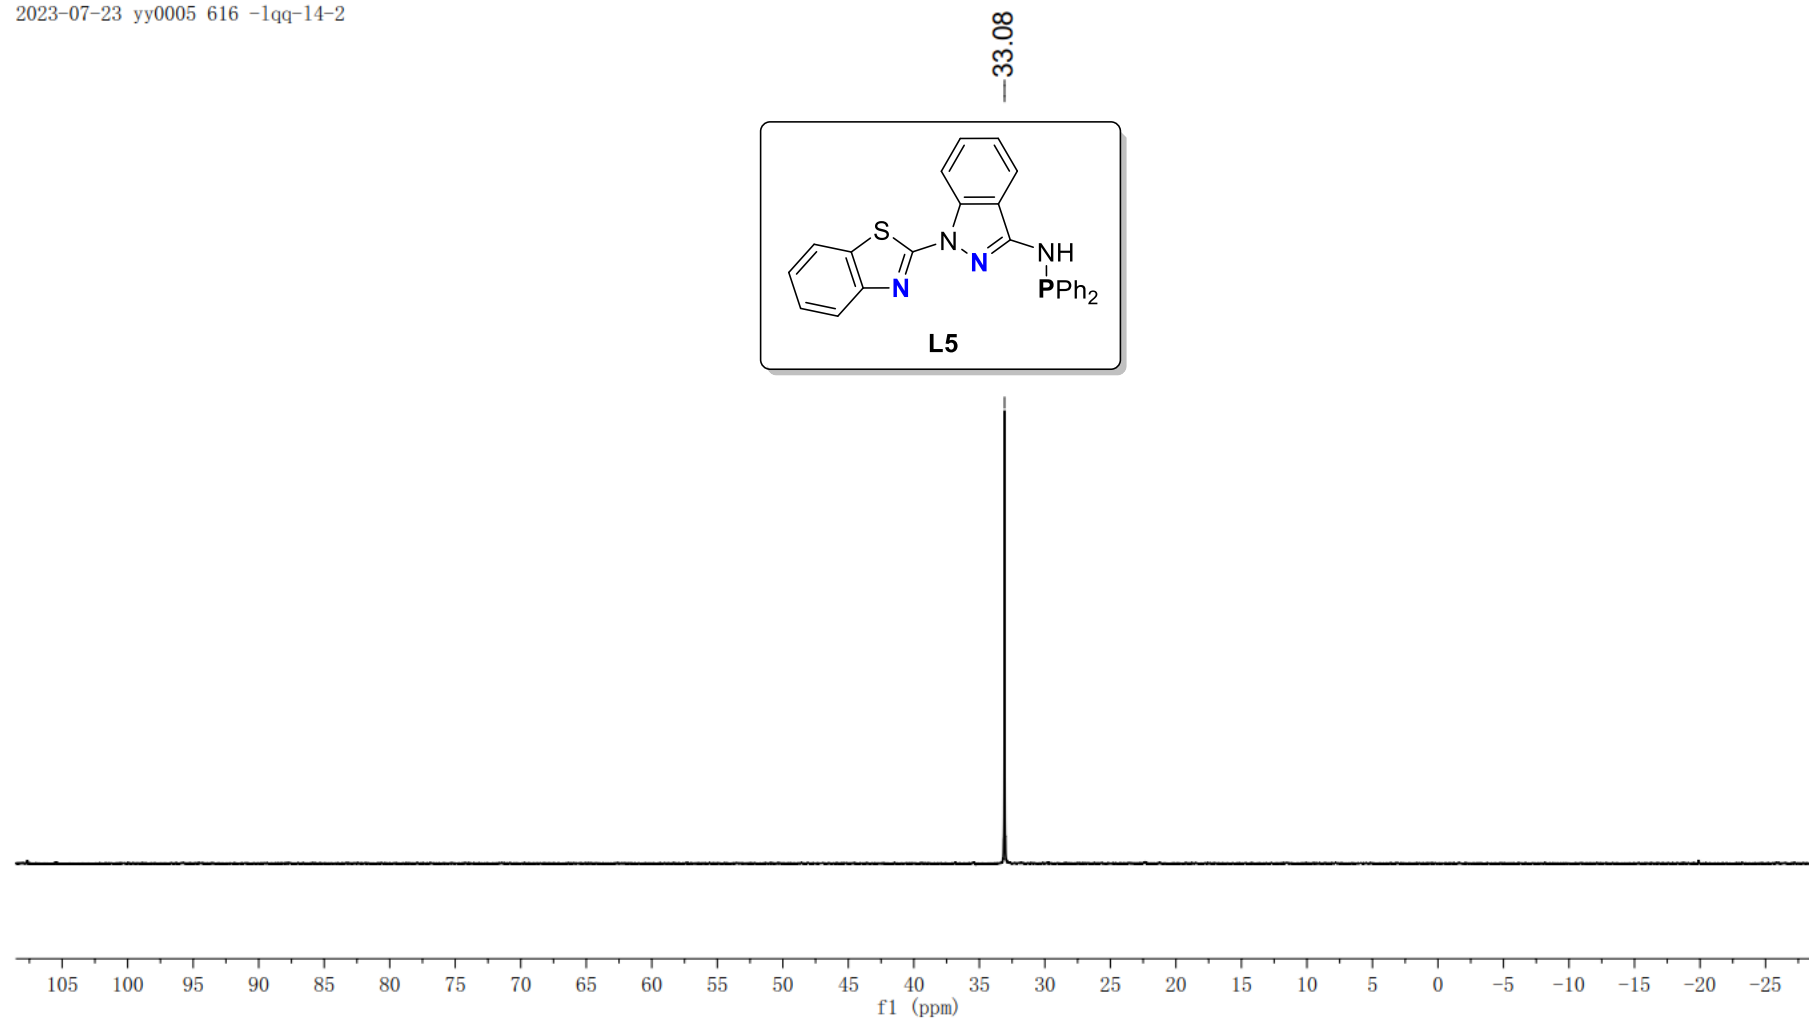

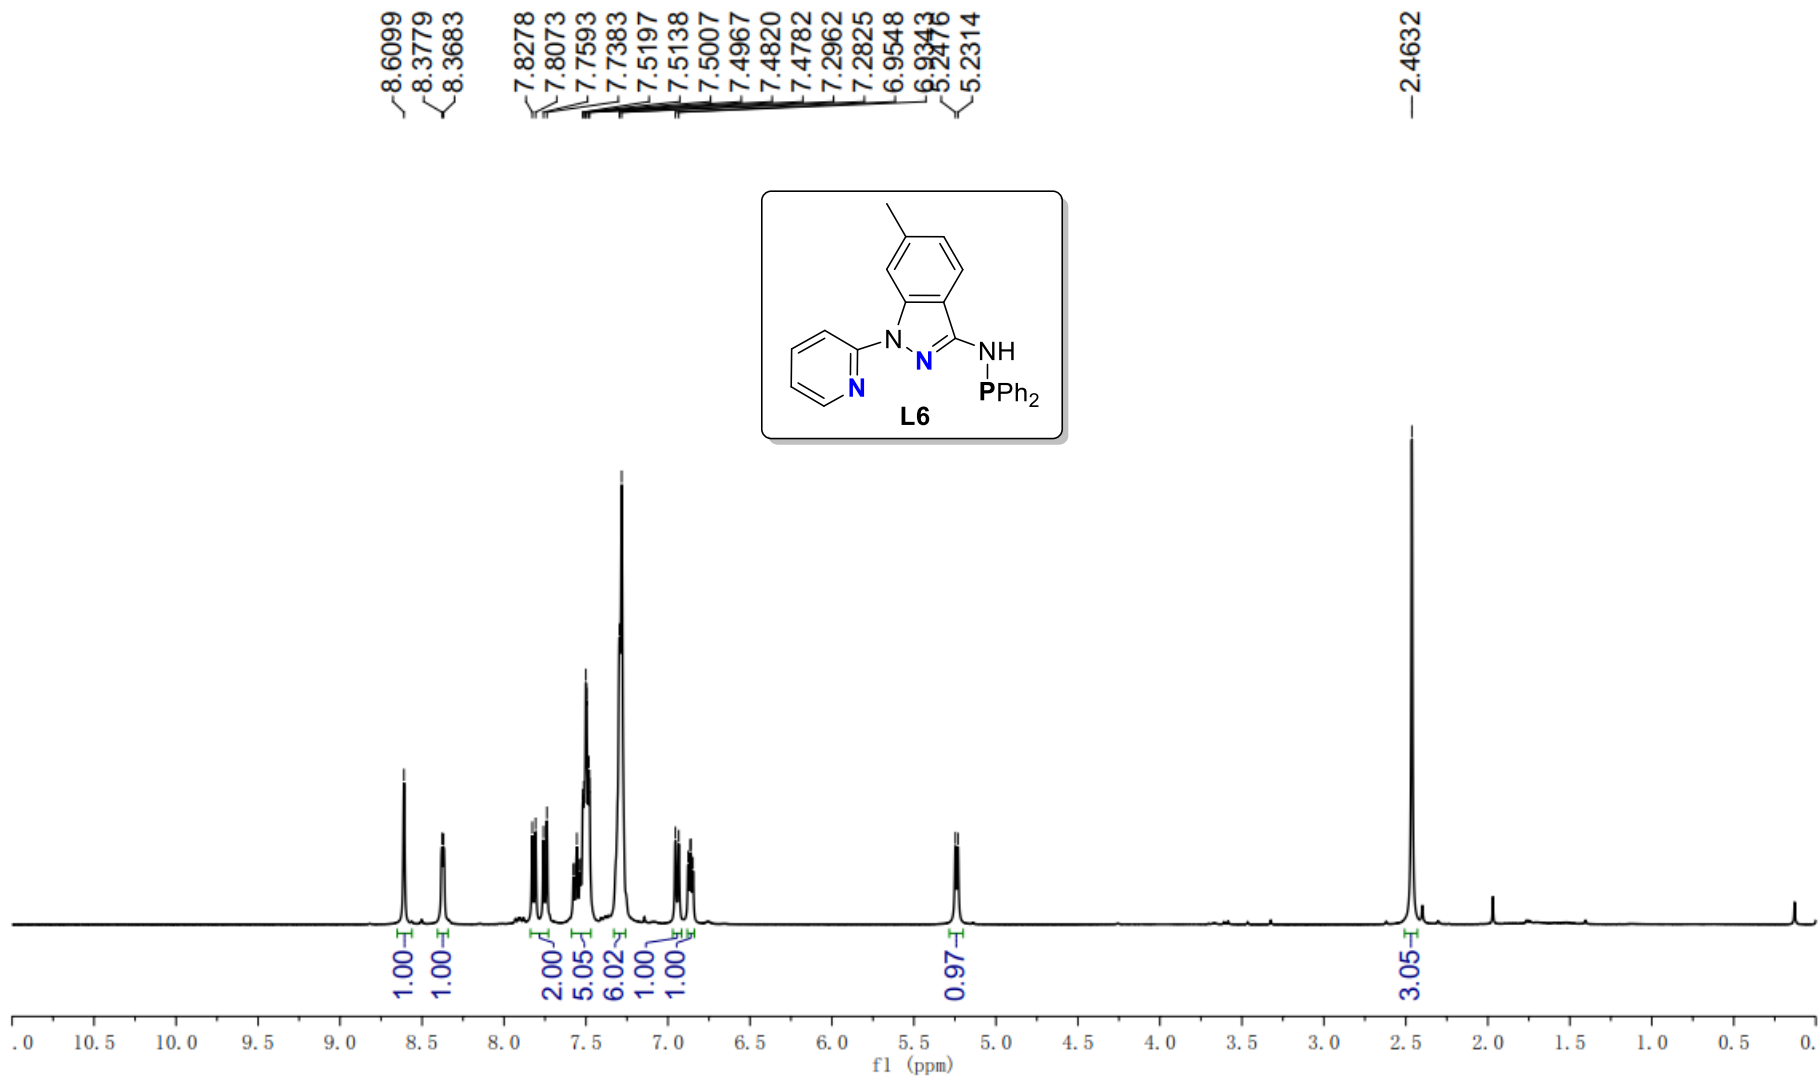



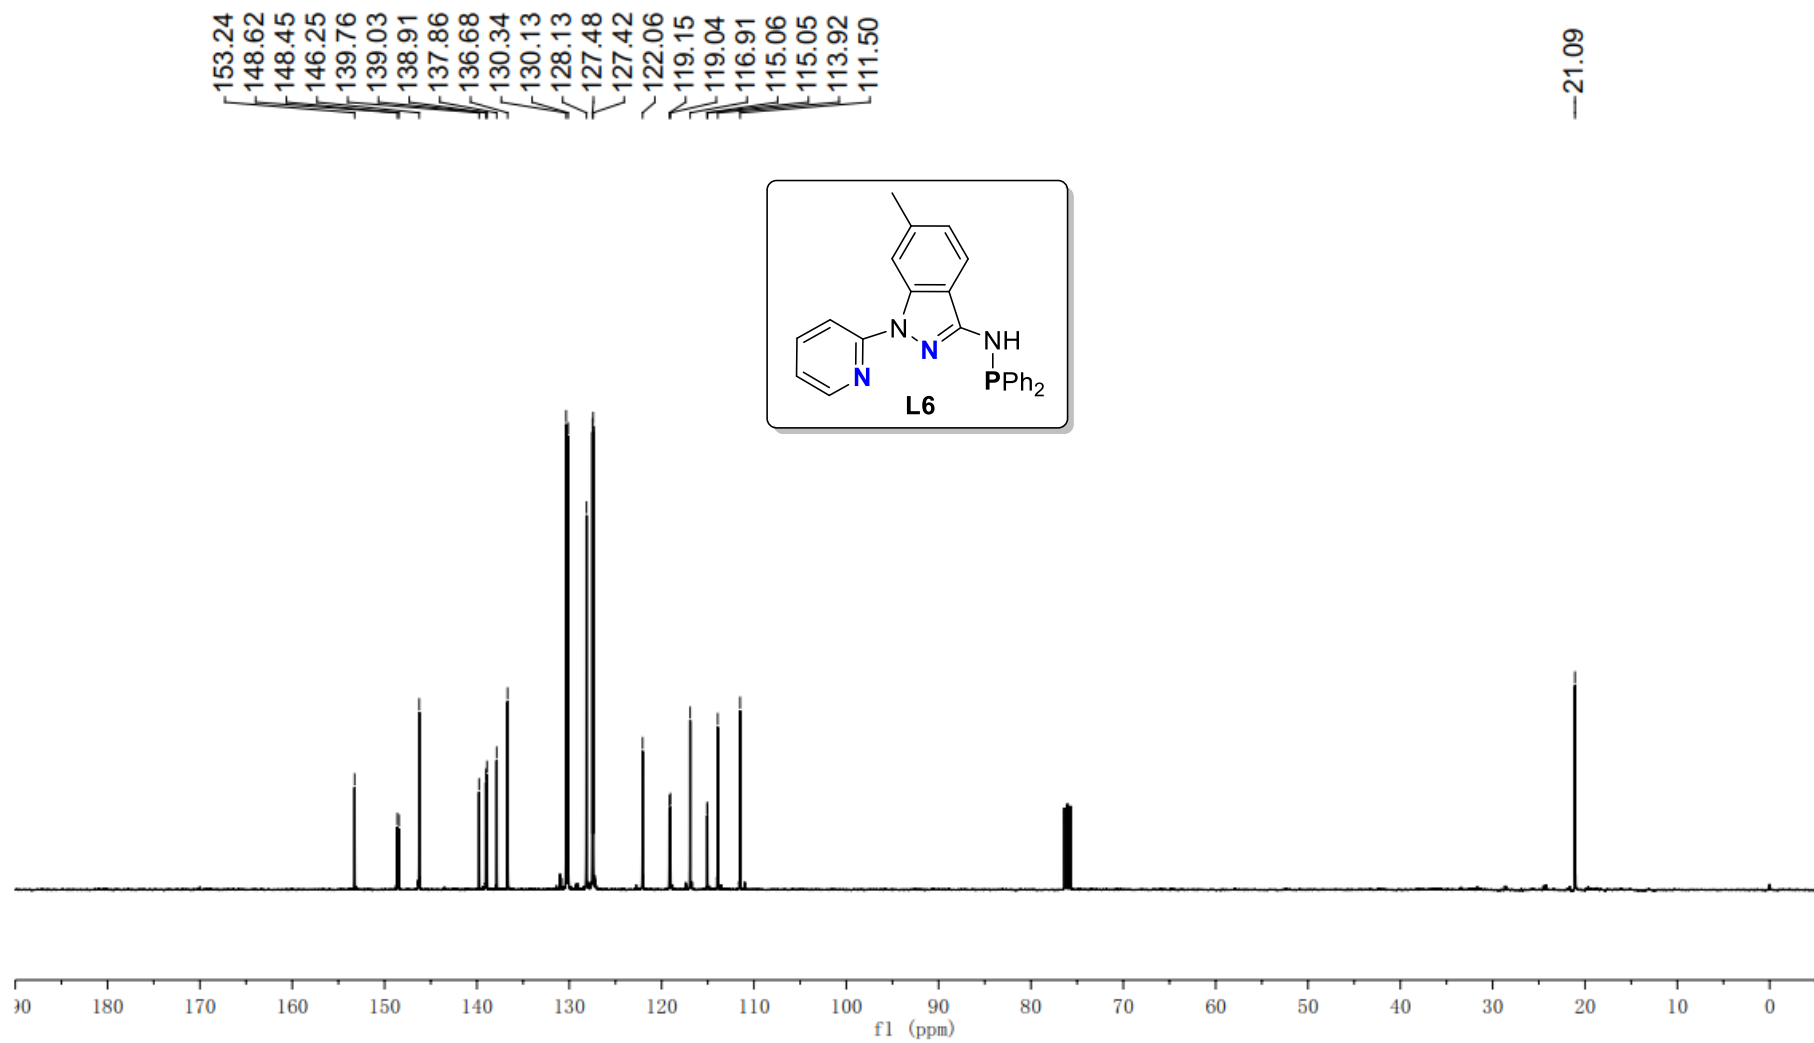

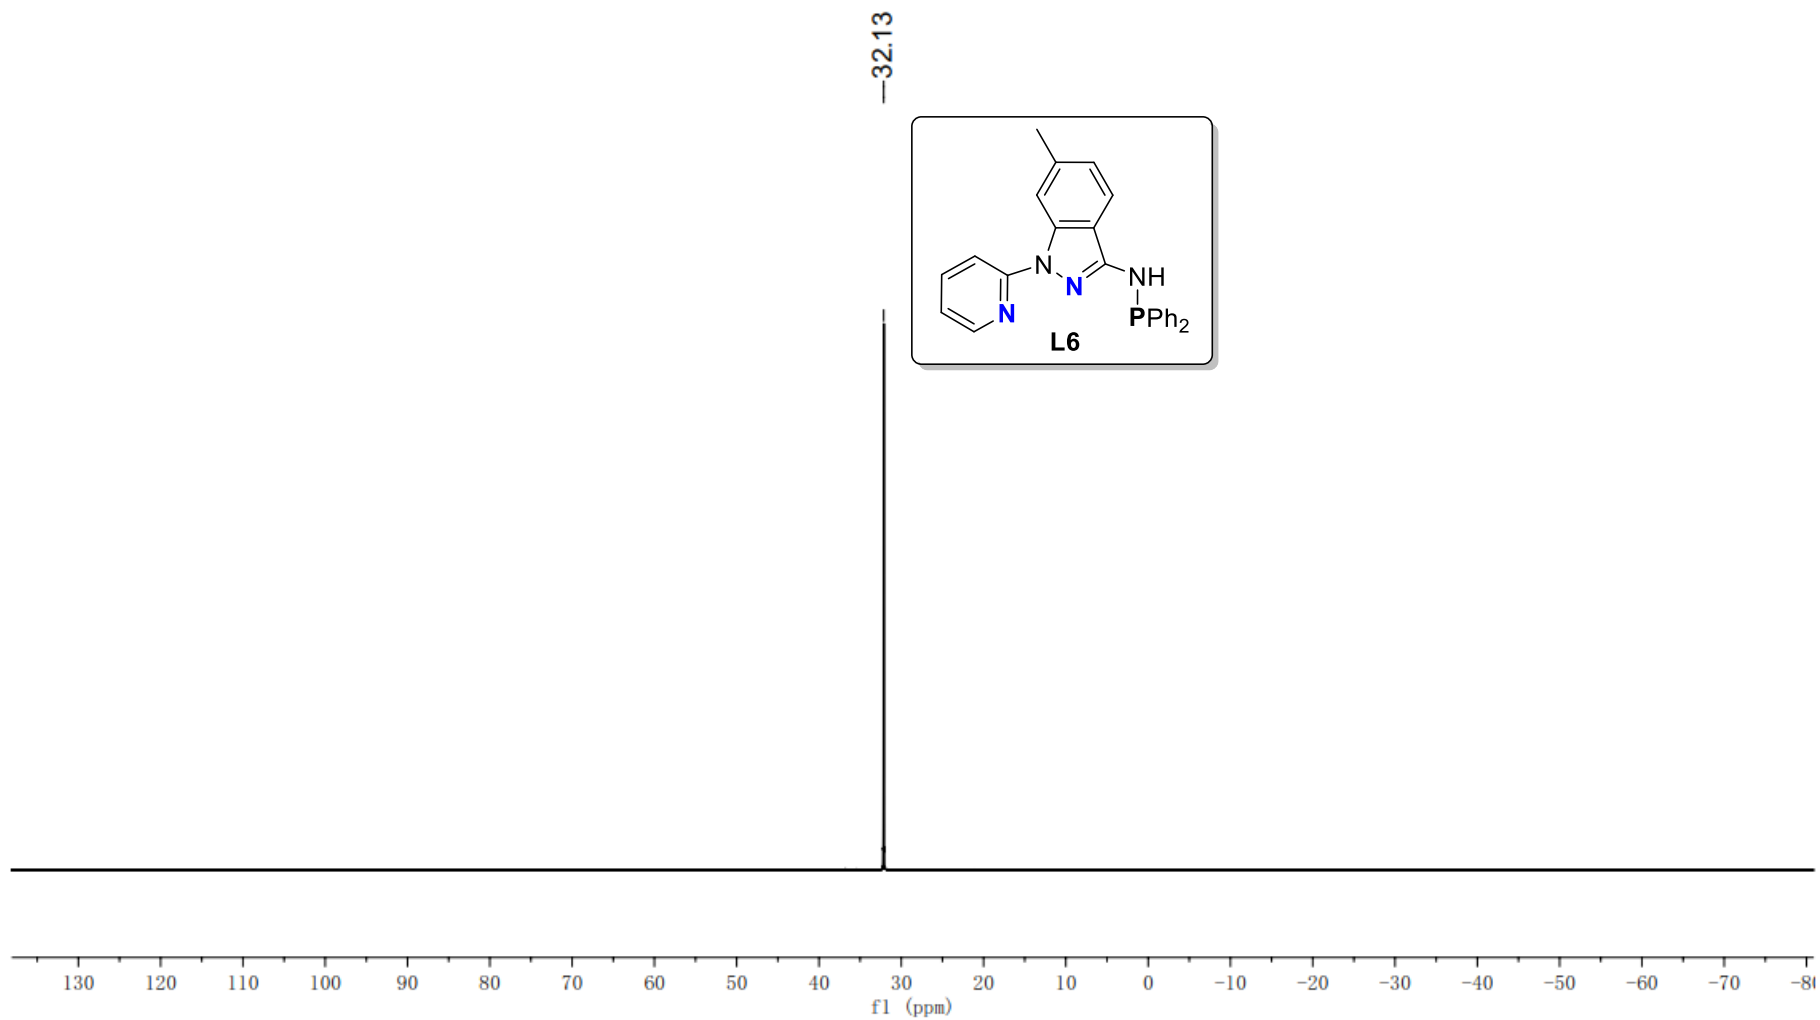

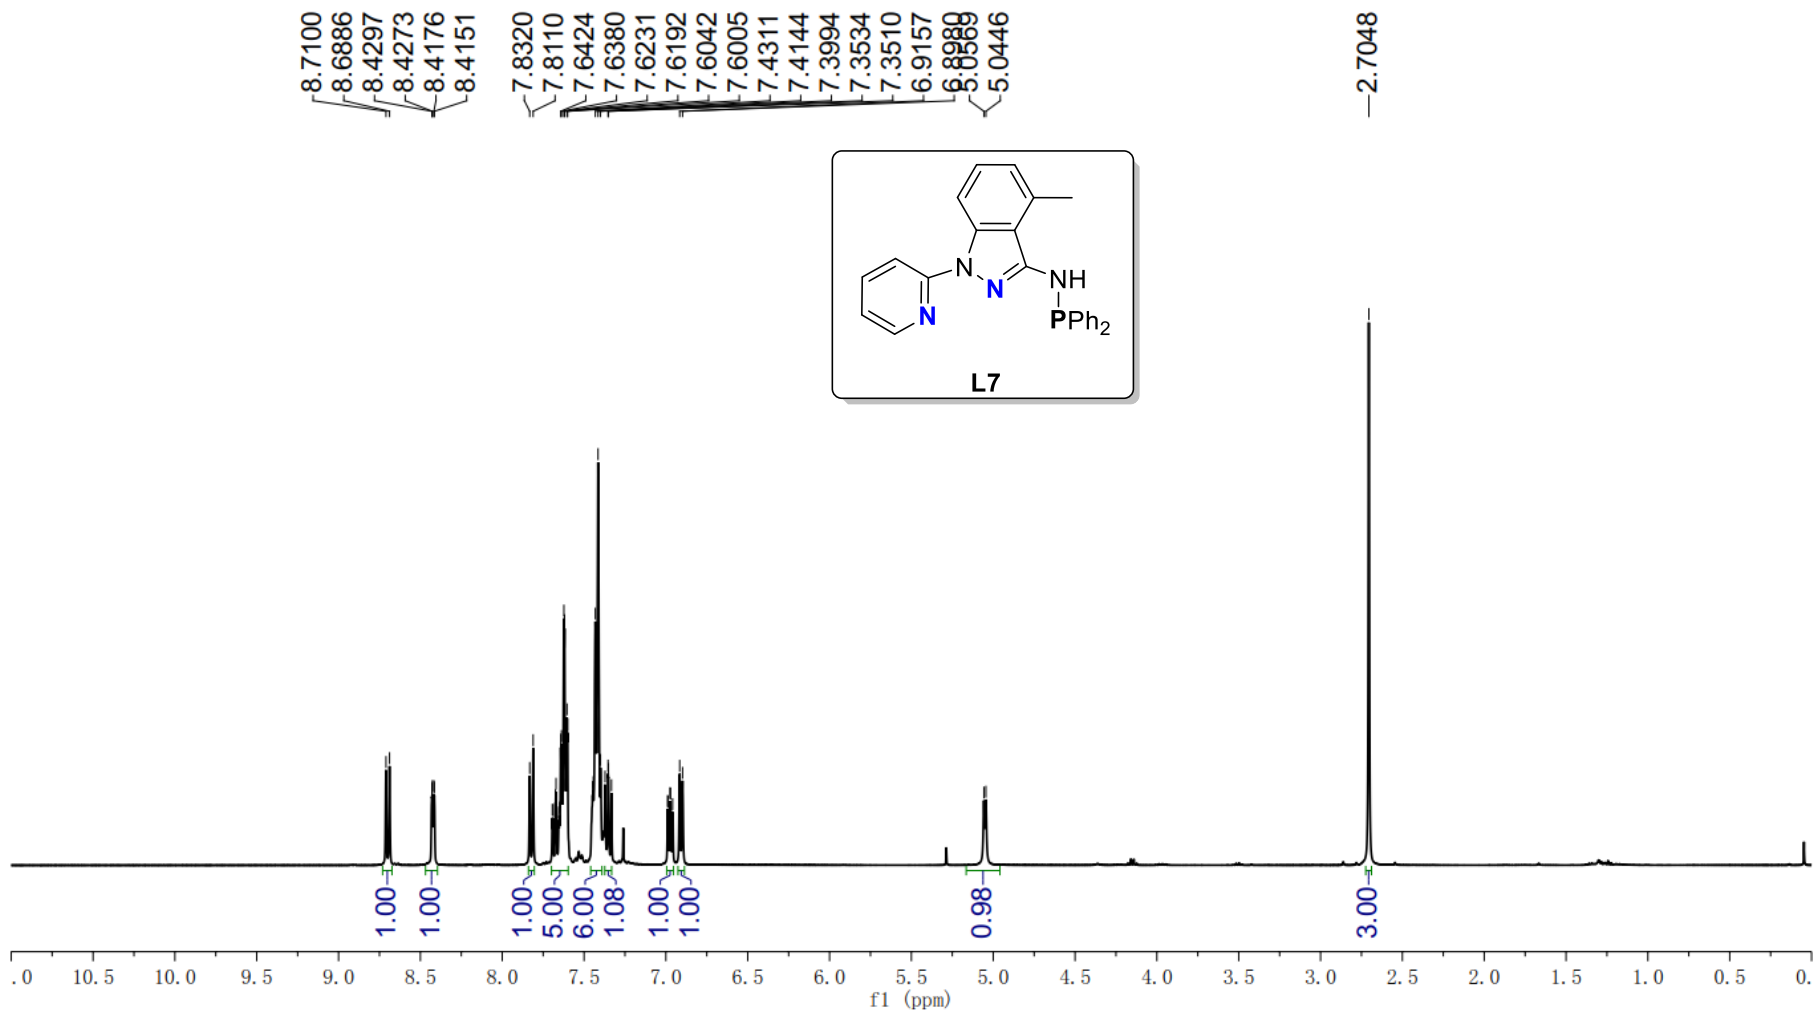

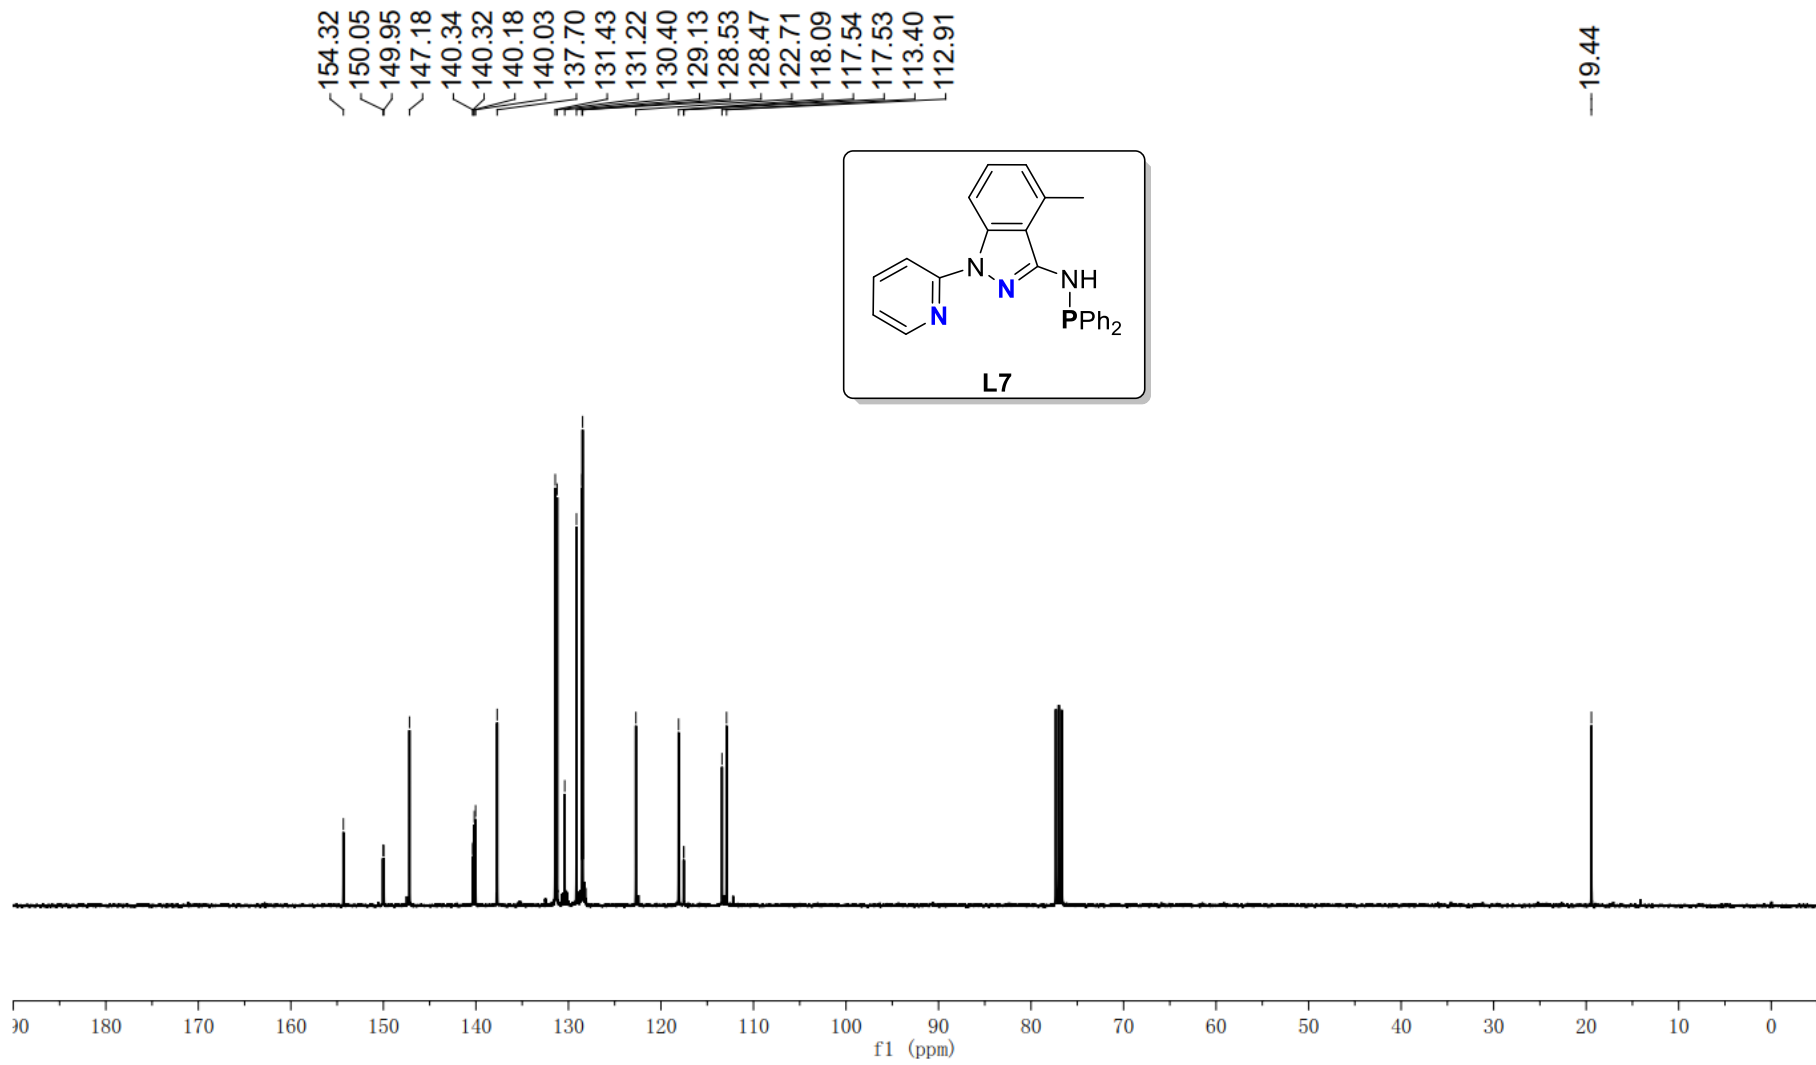

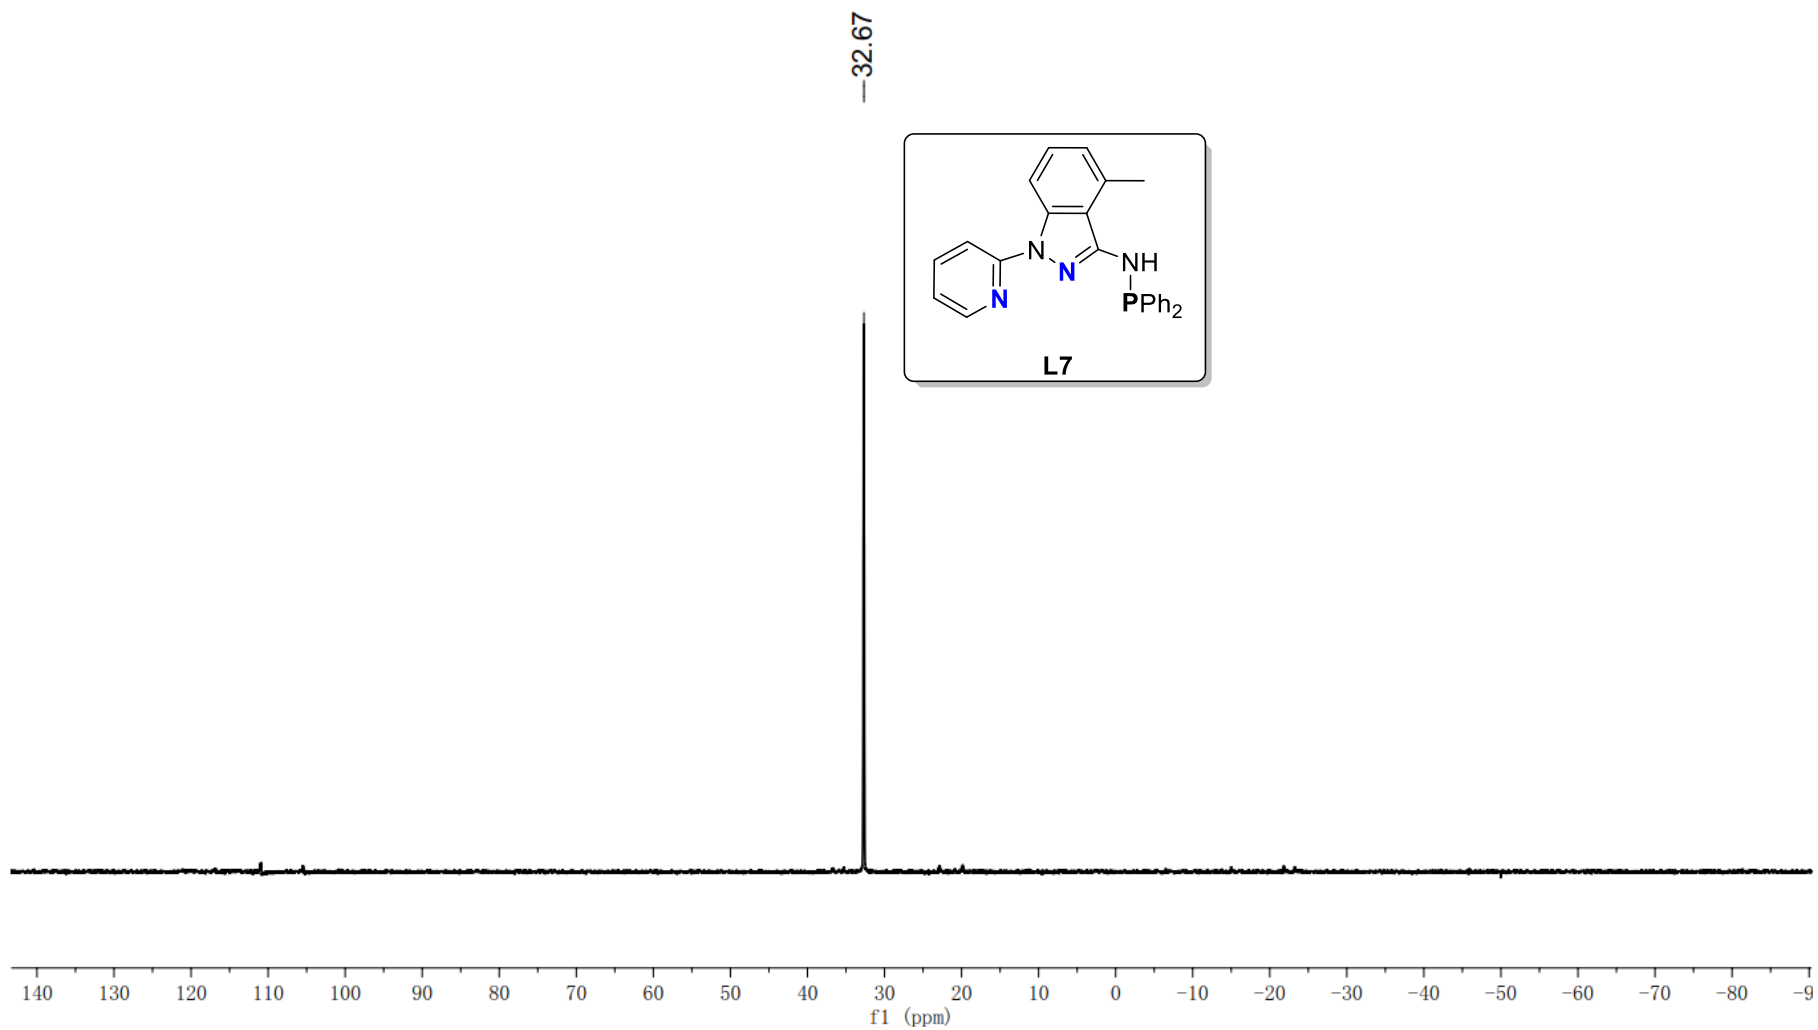

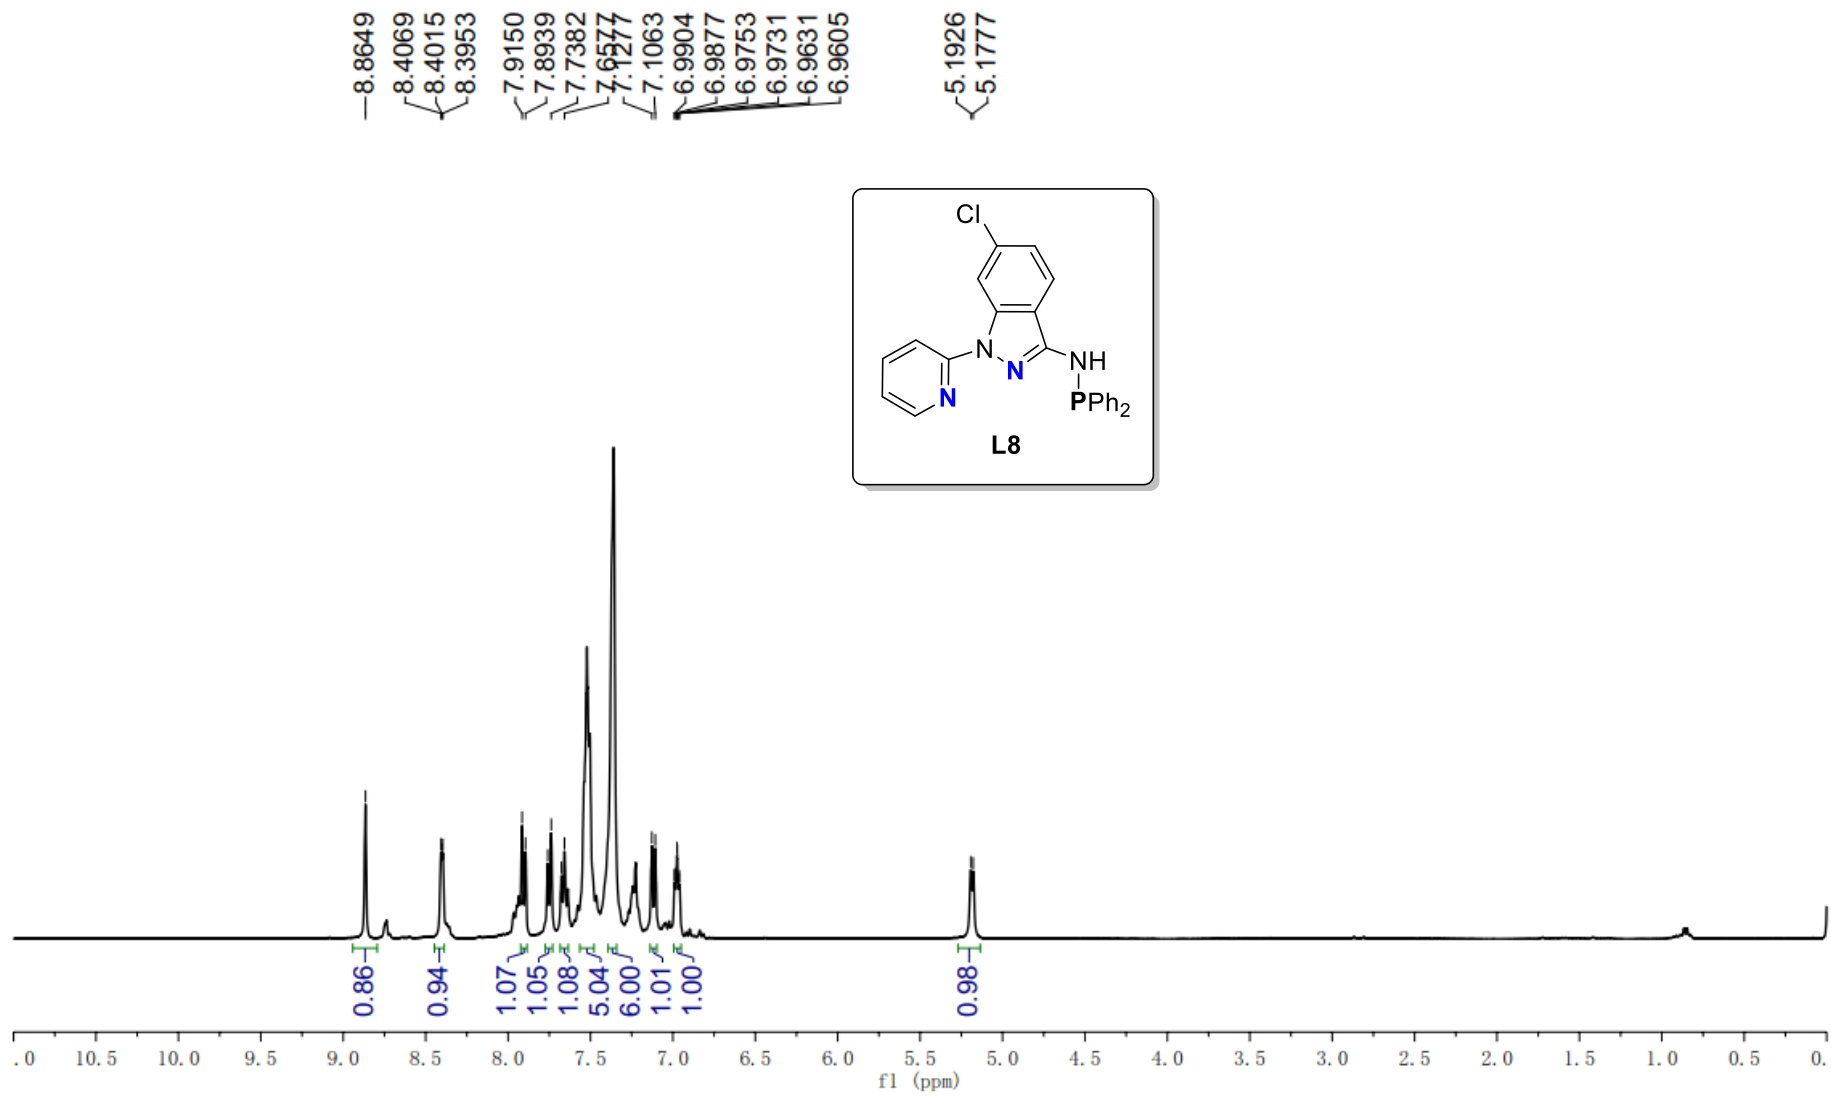

153.85  
149.51  
149.34  
147.44  
140.43  
139.80  
139.68  
137.95  
134.72  
131.39  
131.19  
129.38  
128.65  
128.58  
121.94  
121.60  
121.49  
118.59  
115.26  
112.42

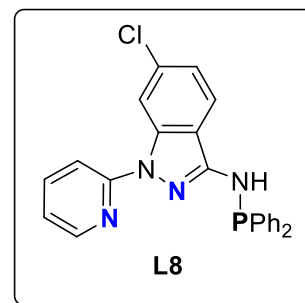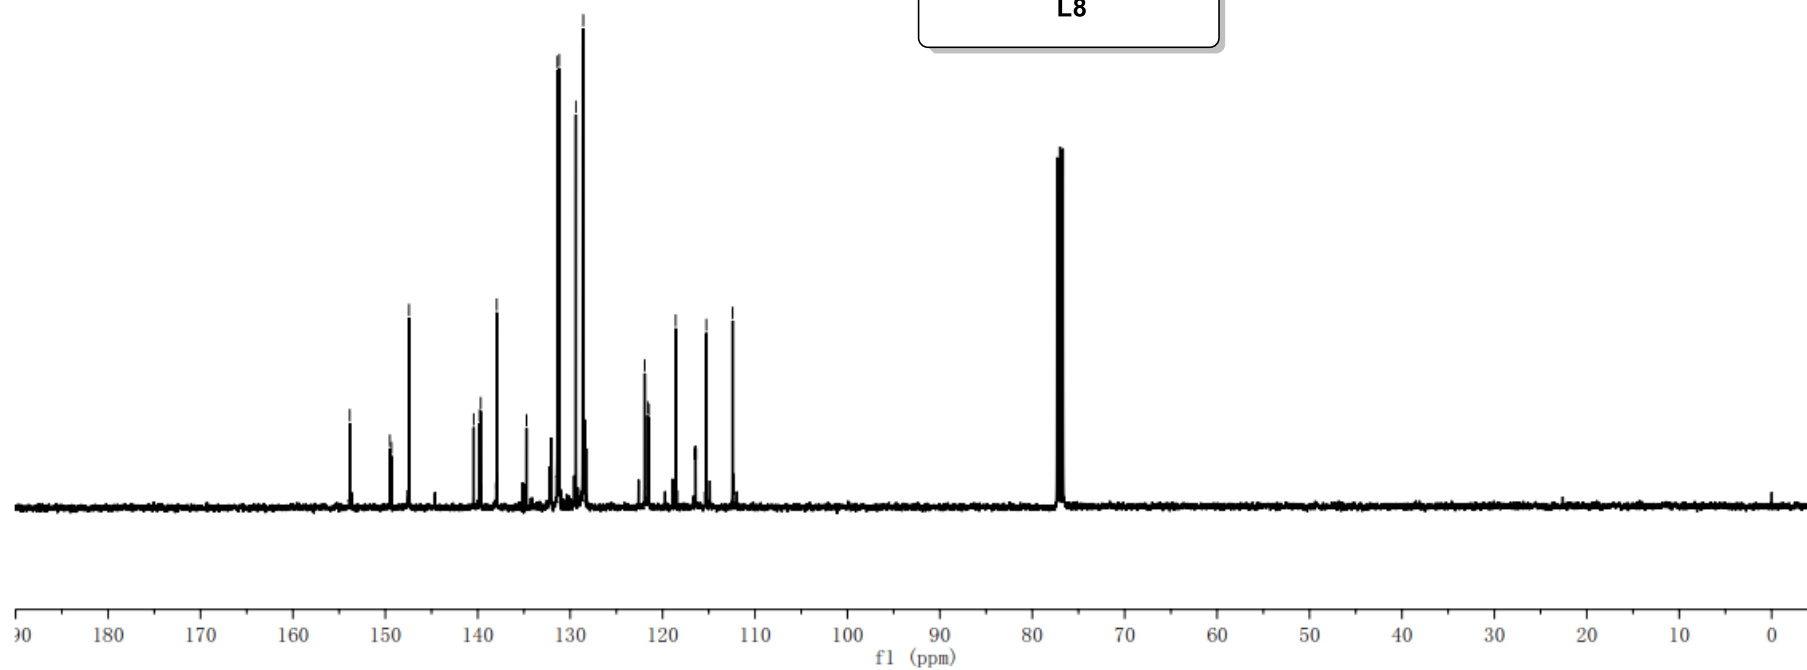

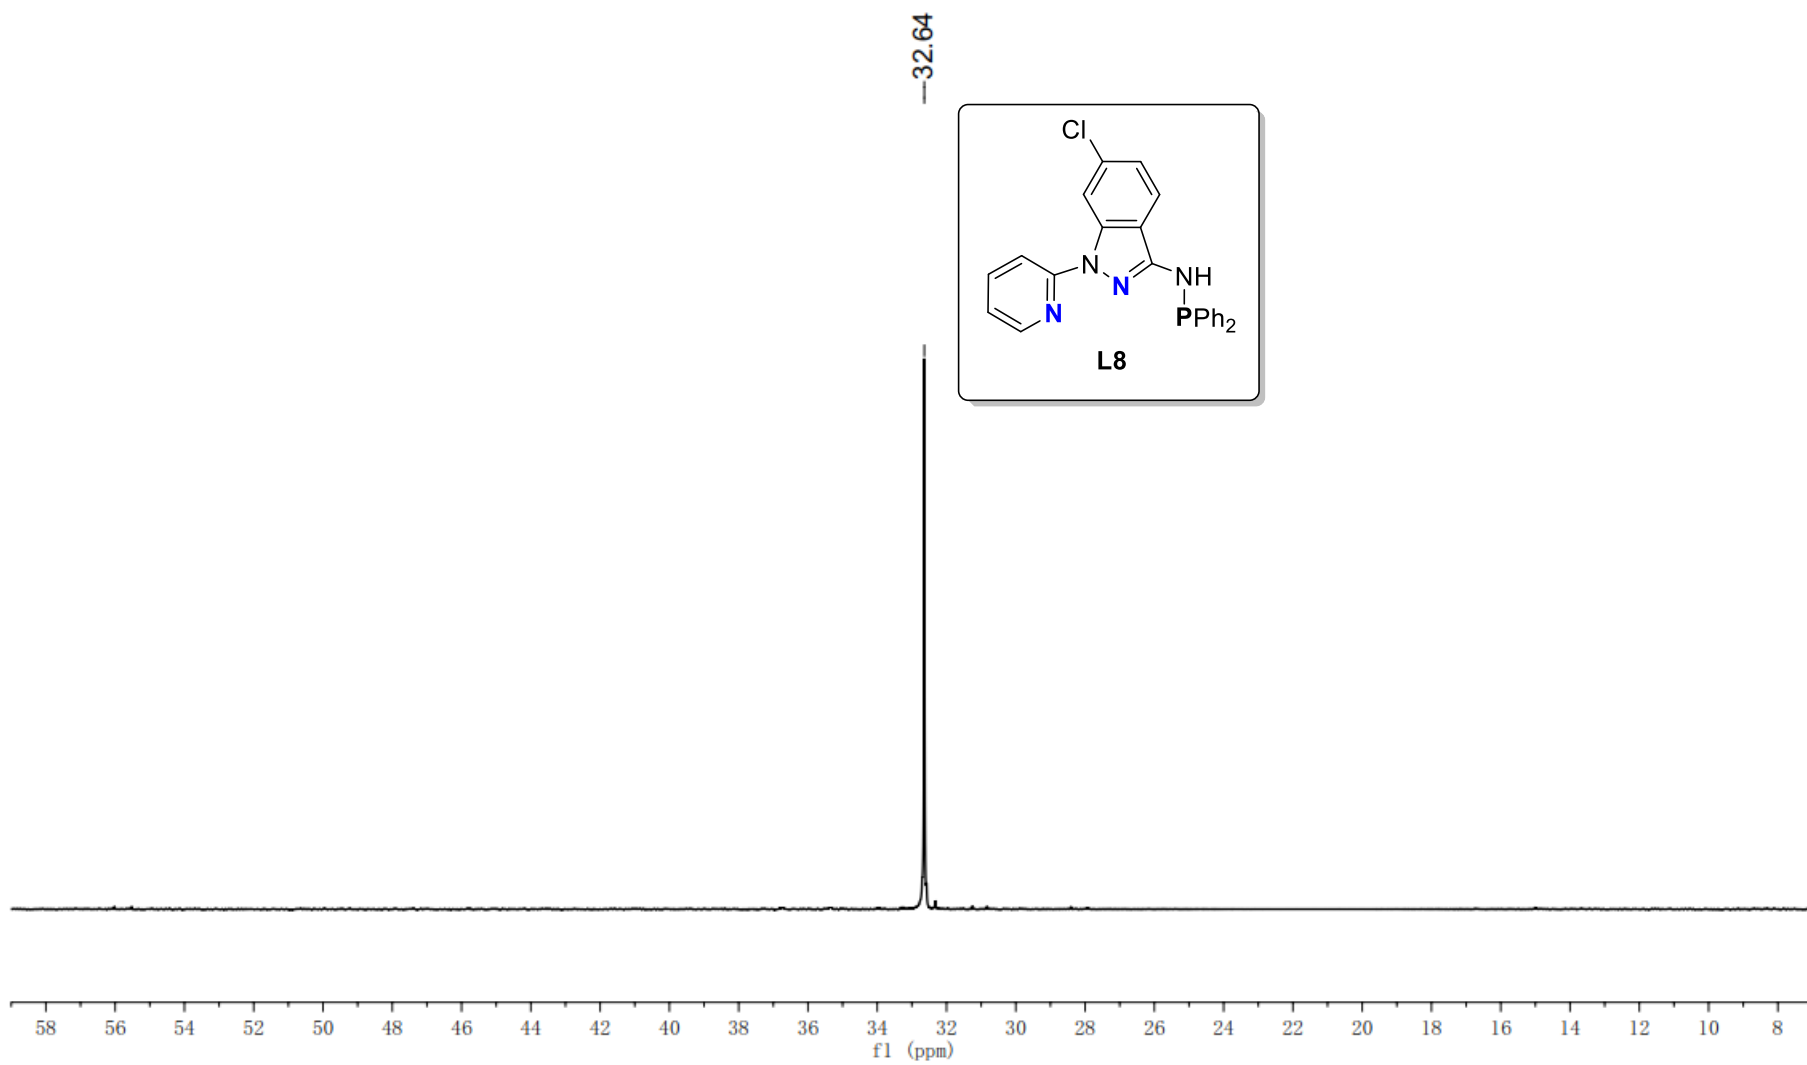



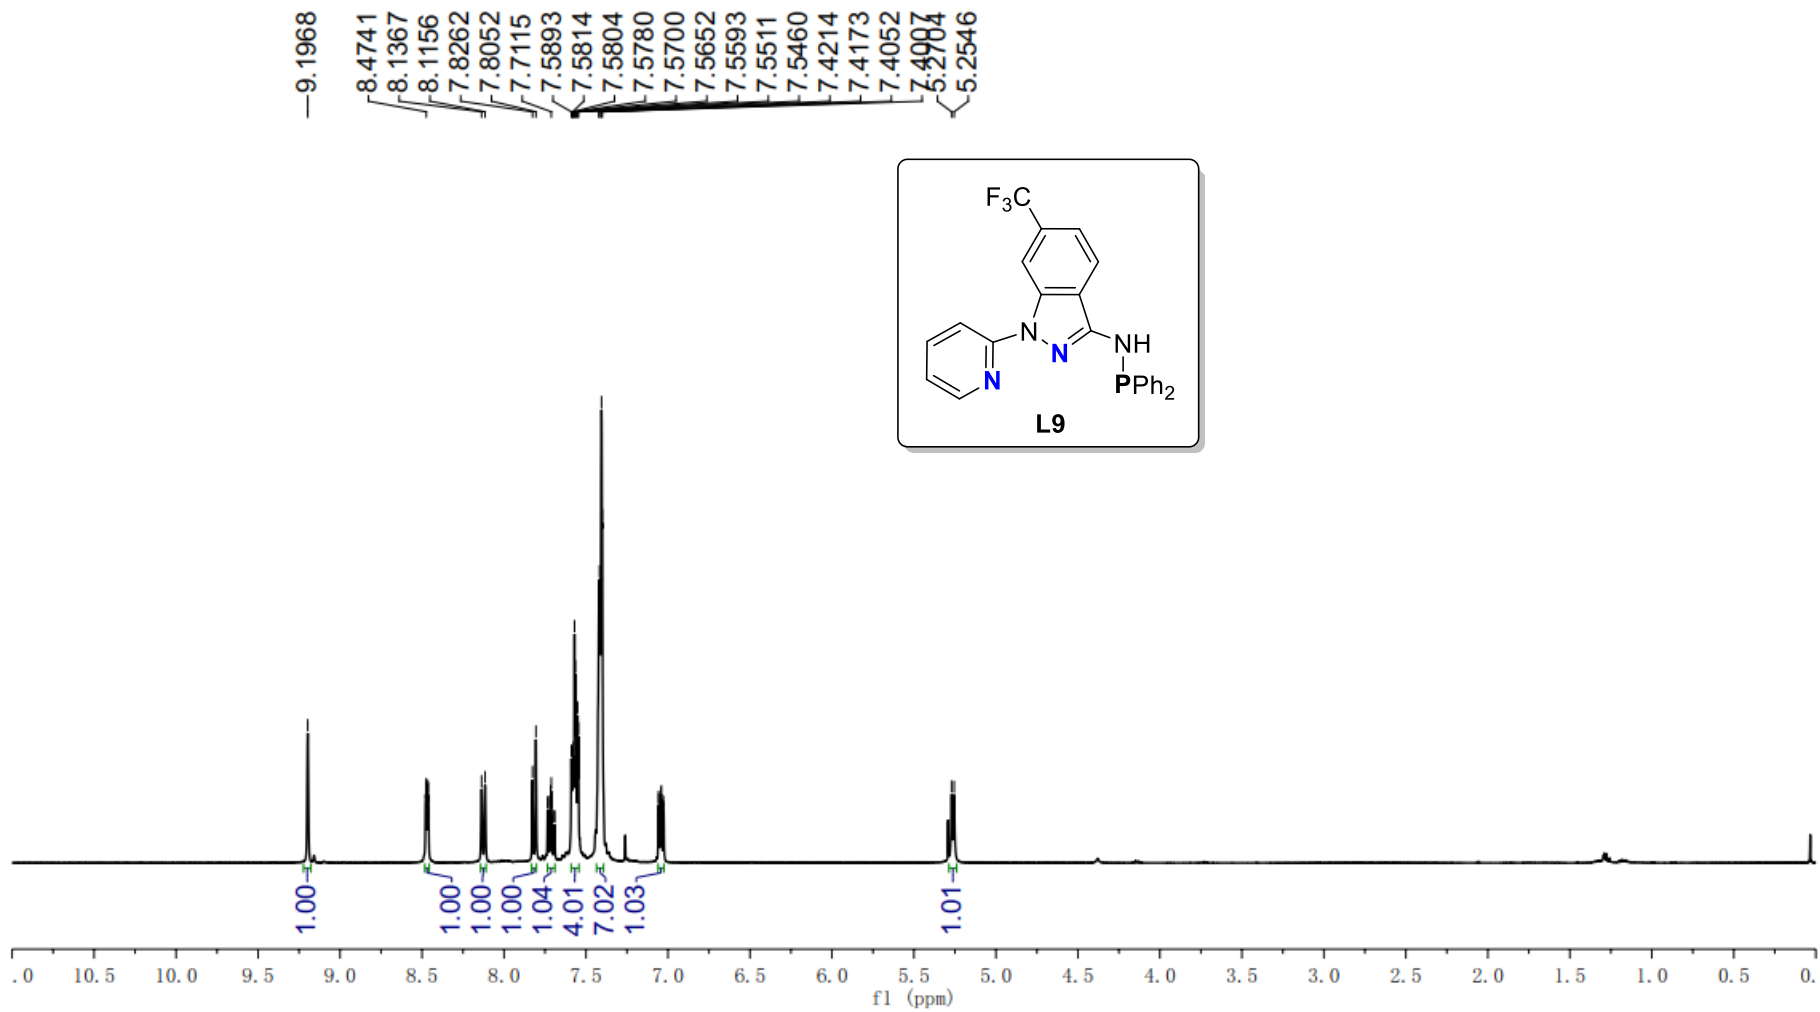

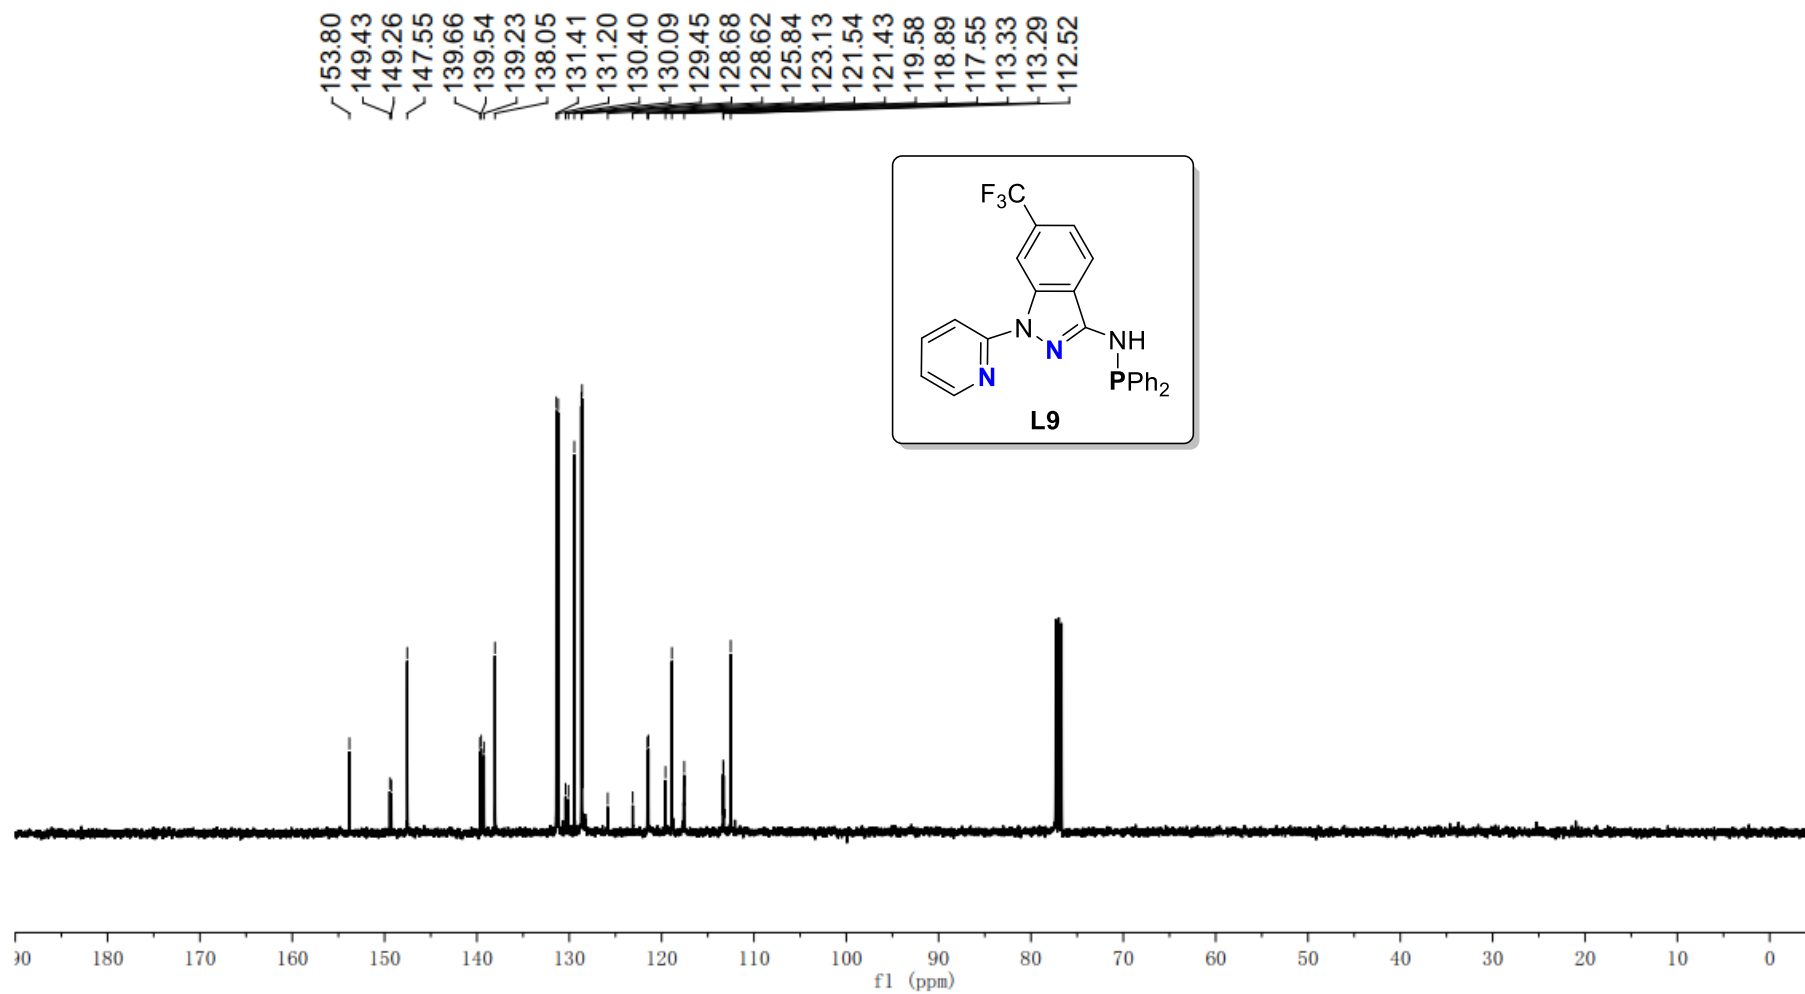

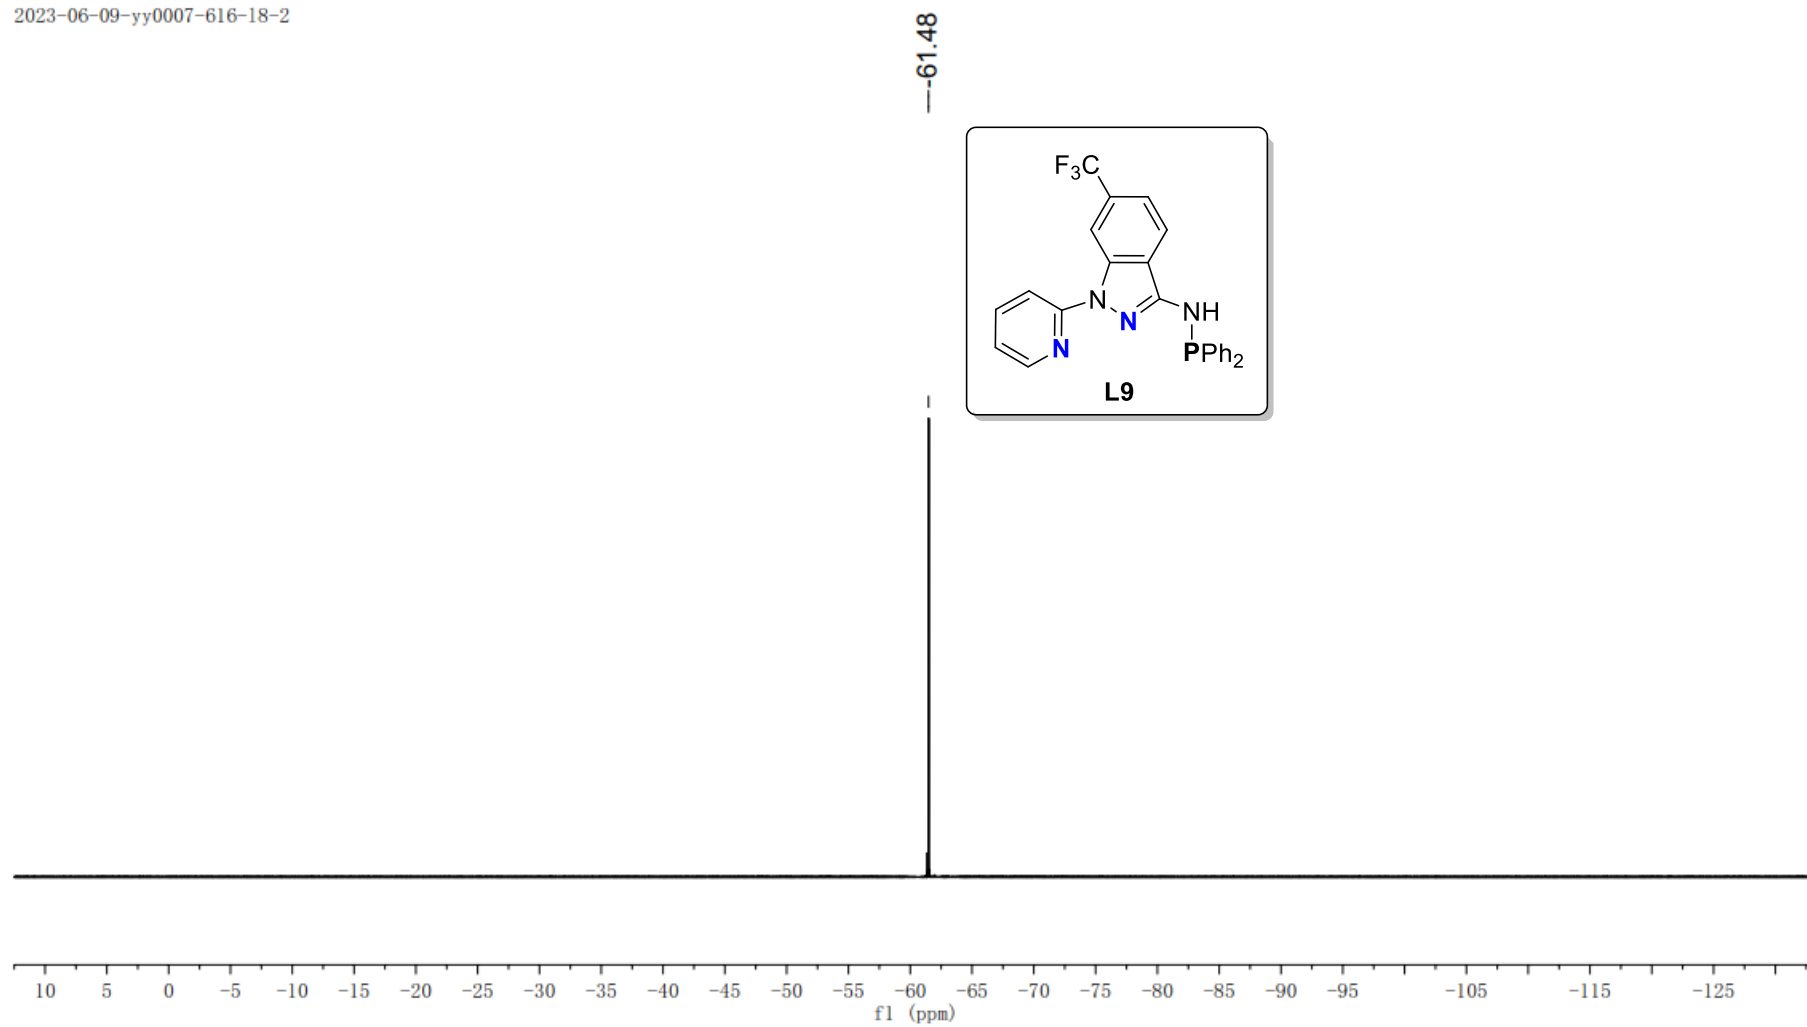

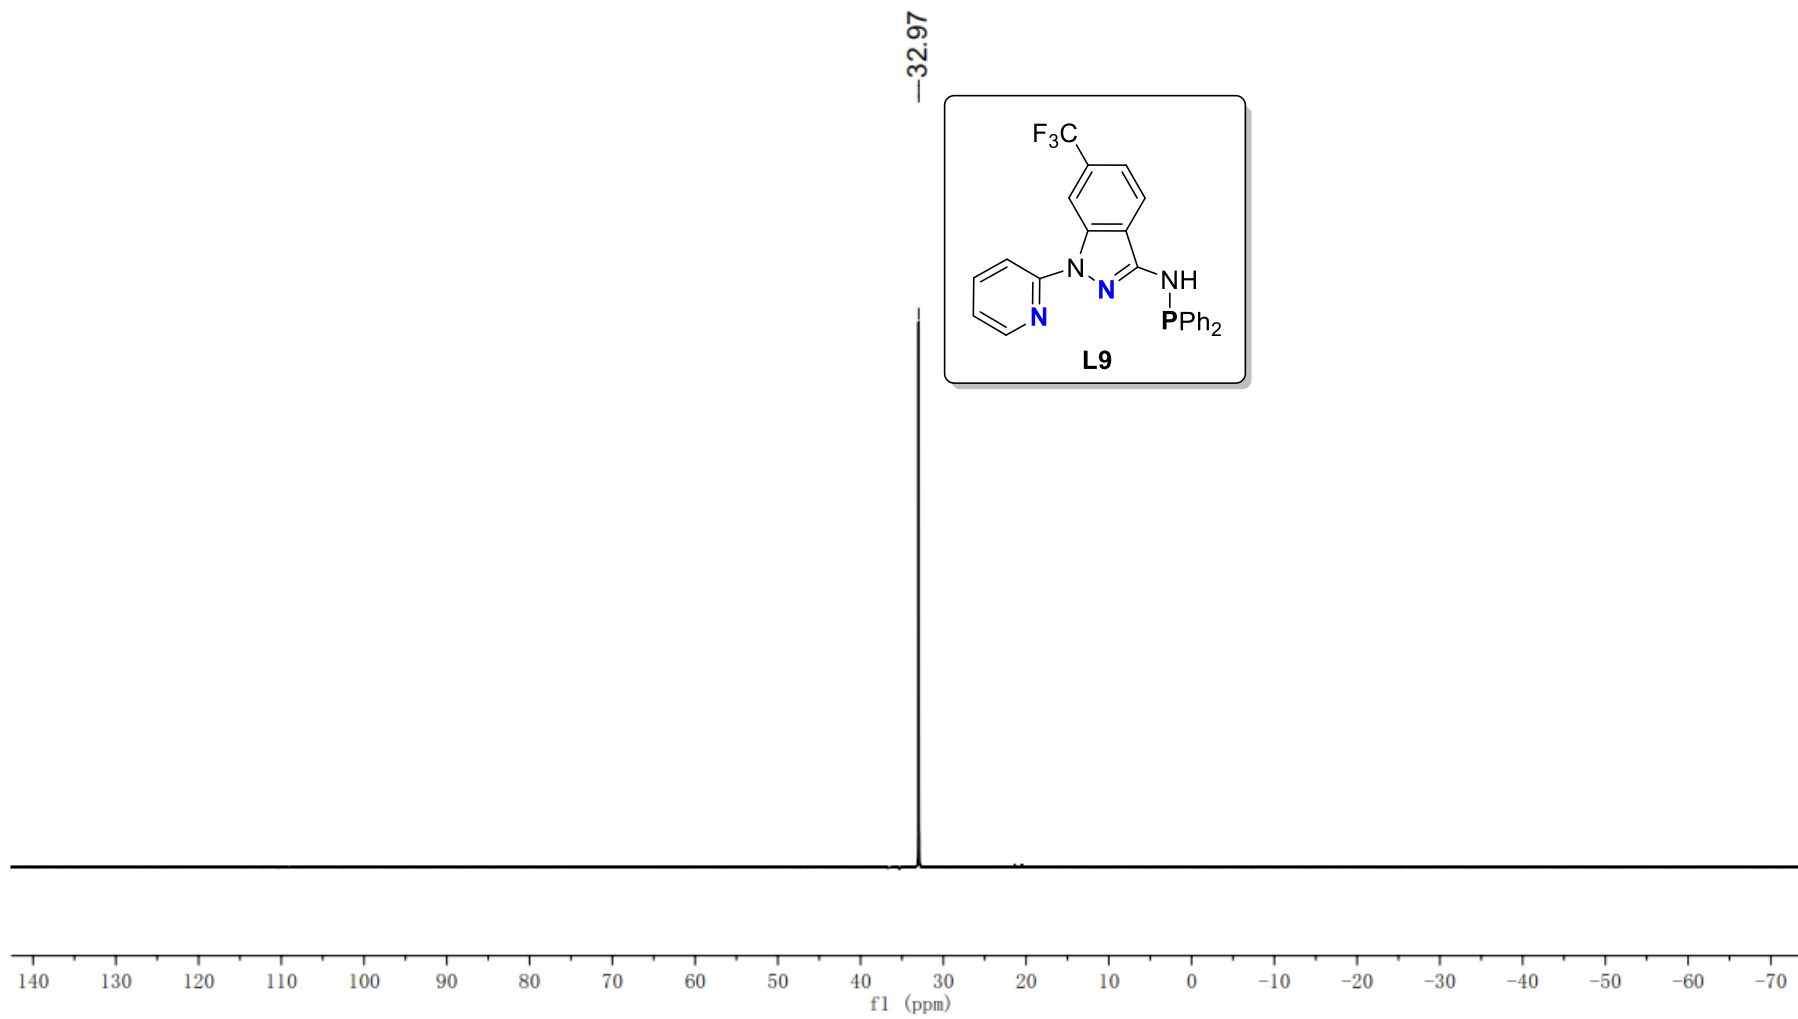

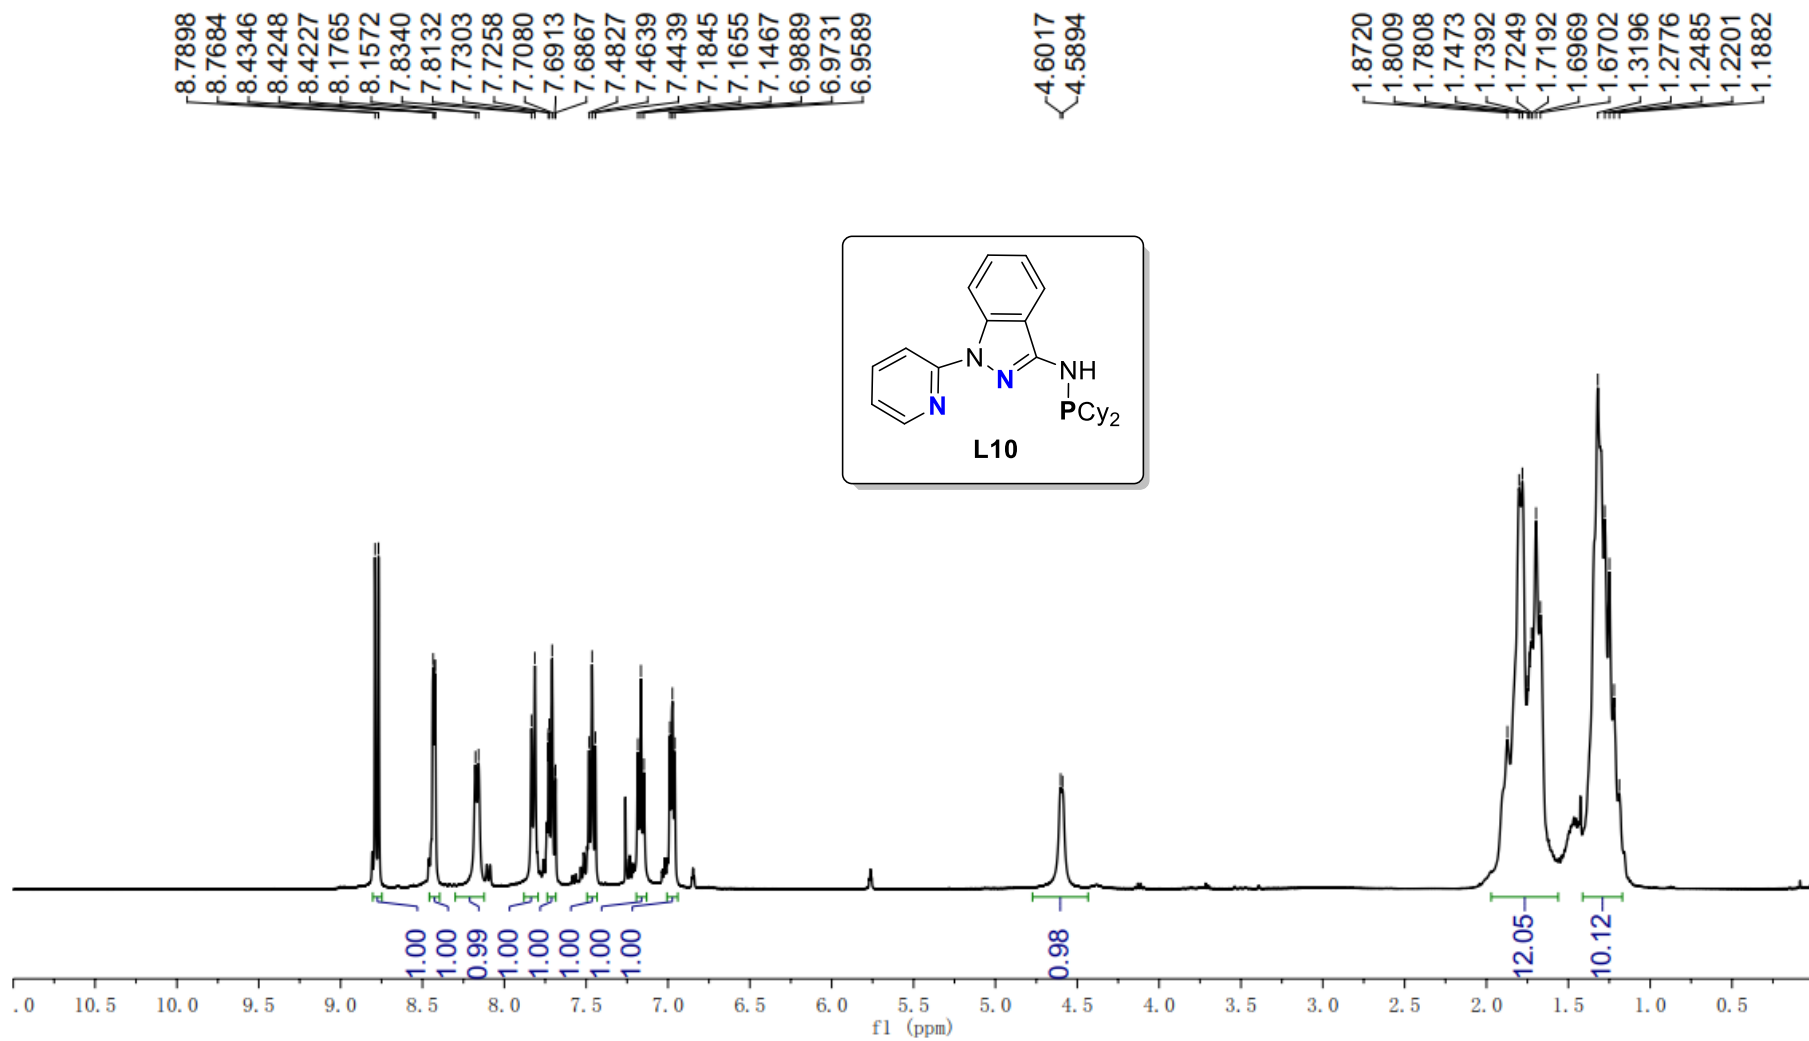

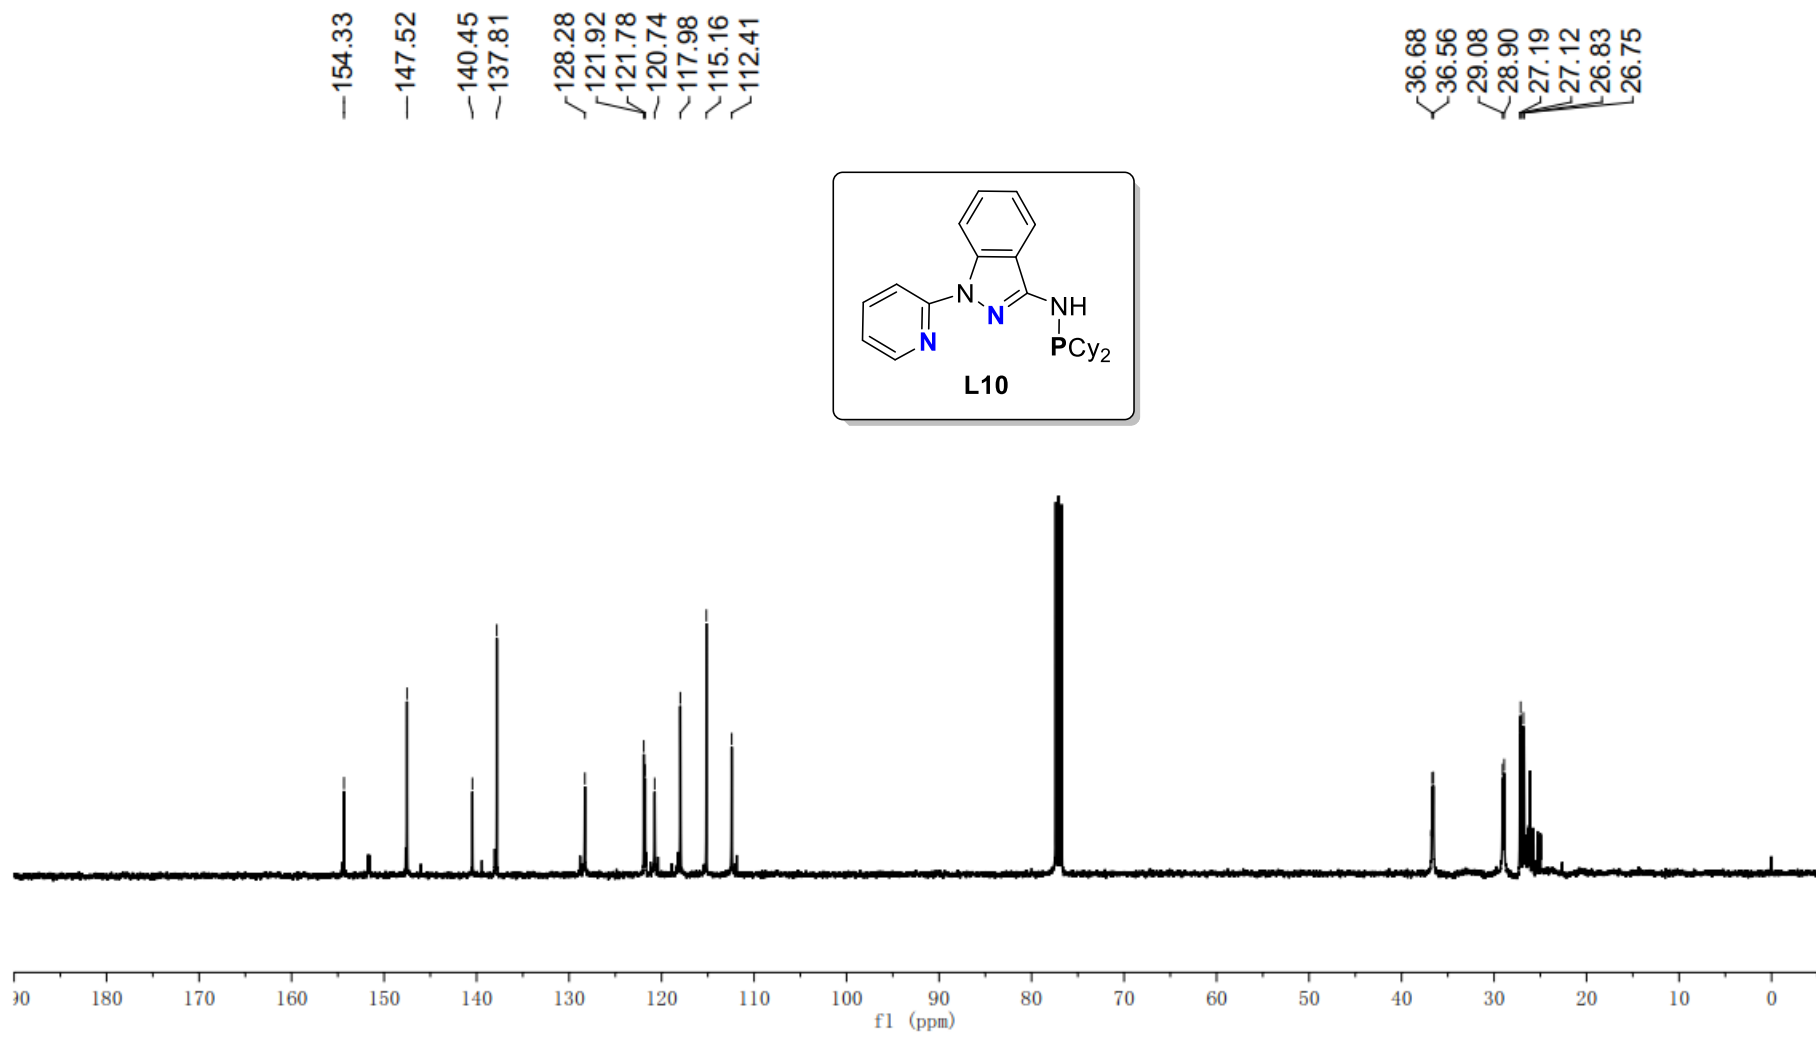

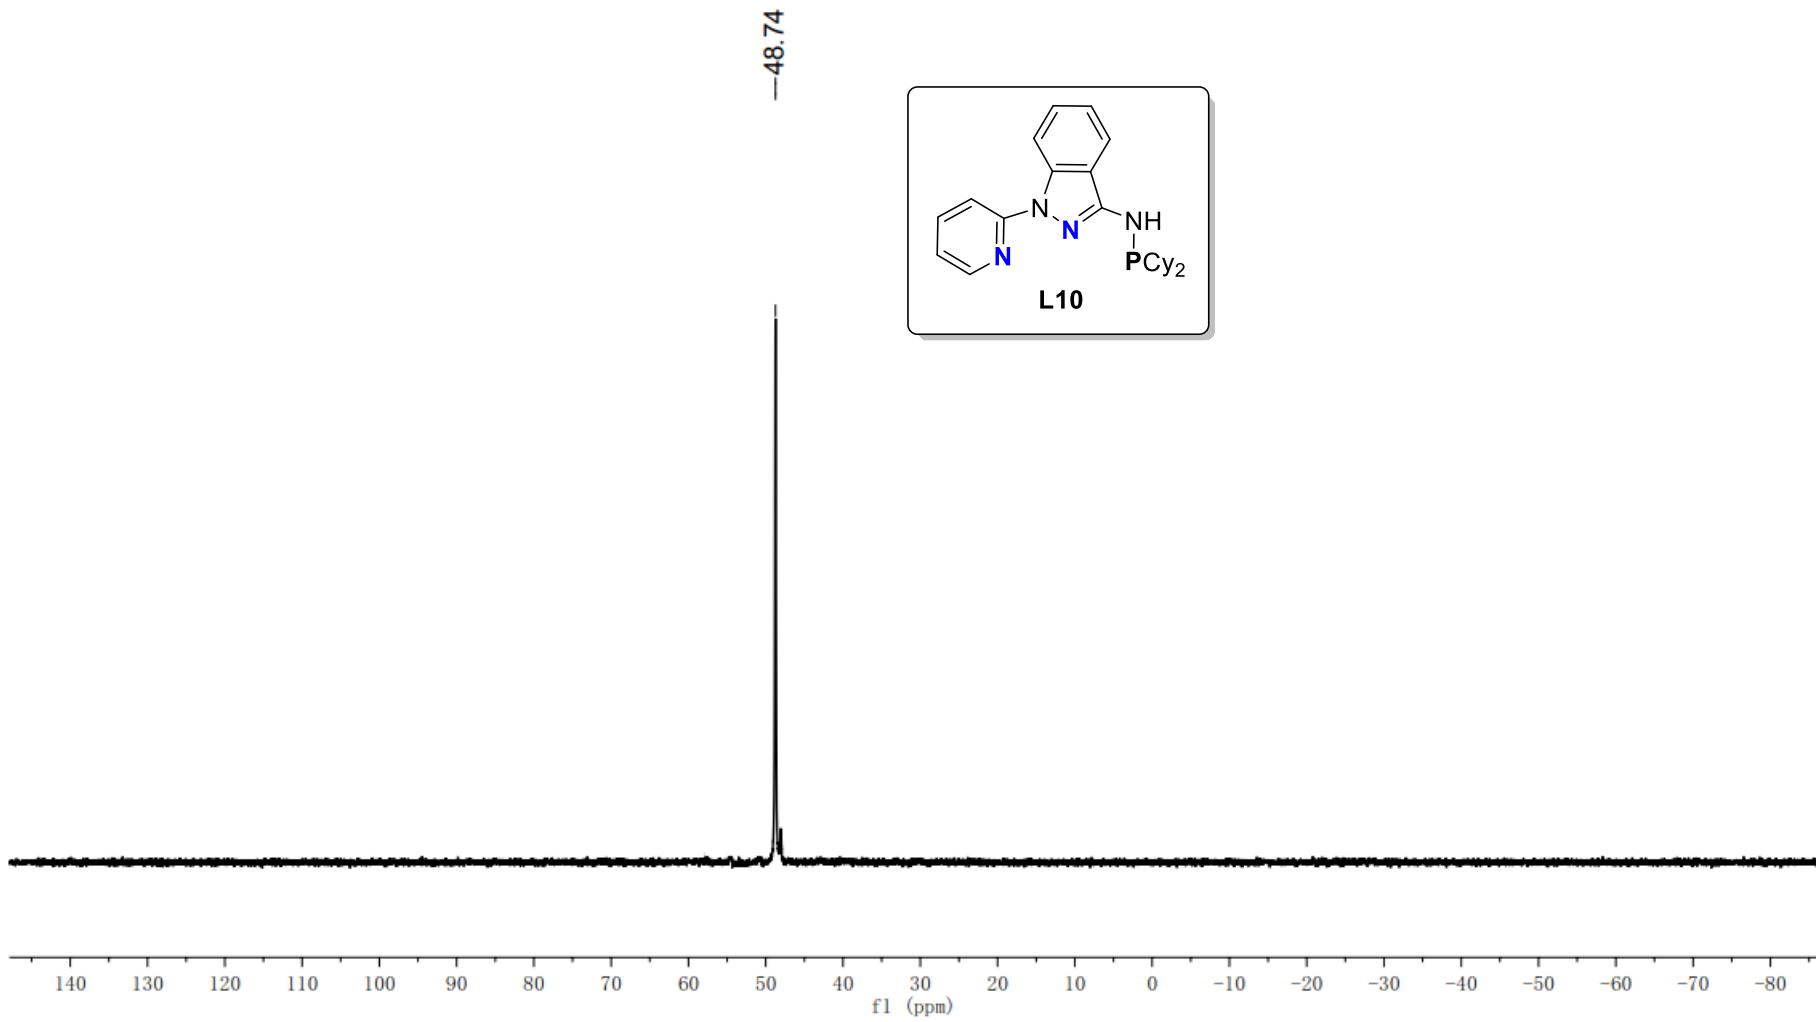

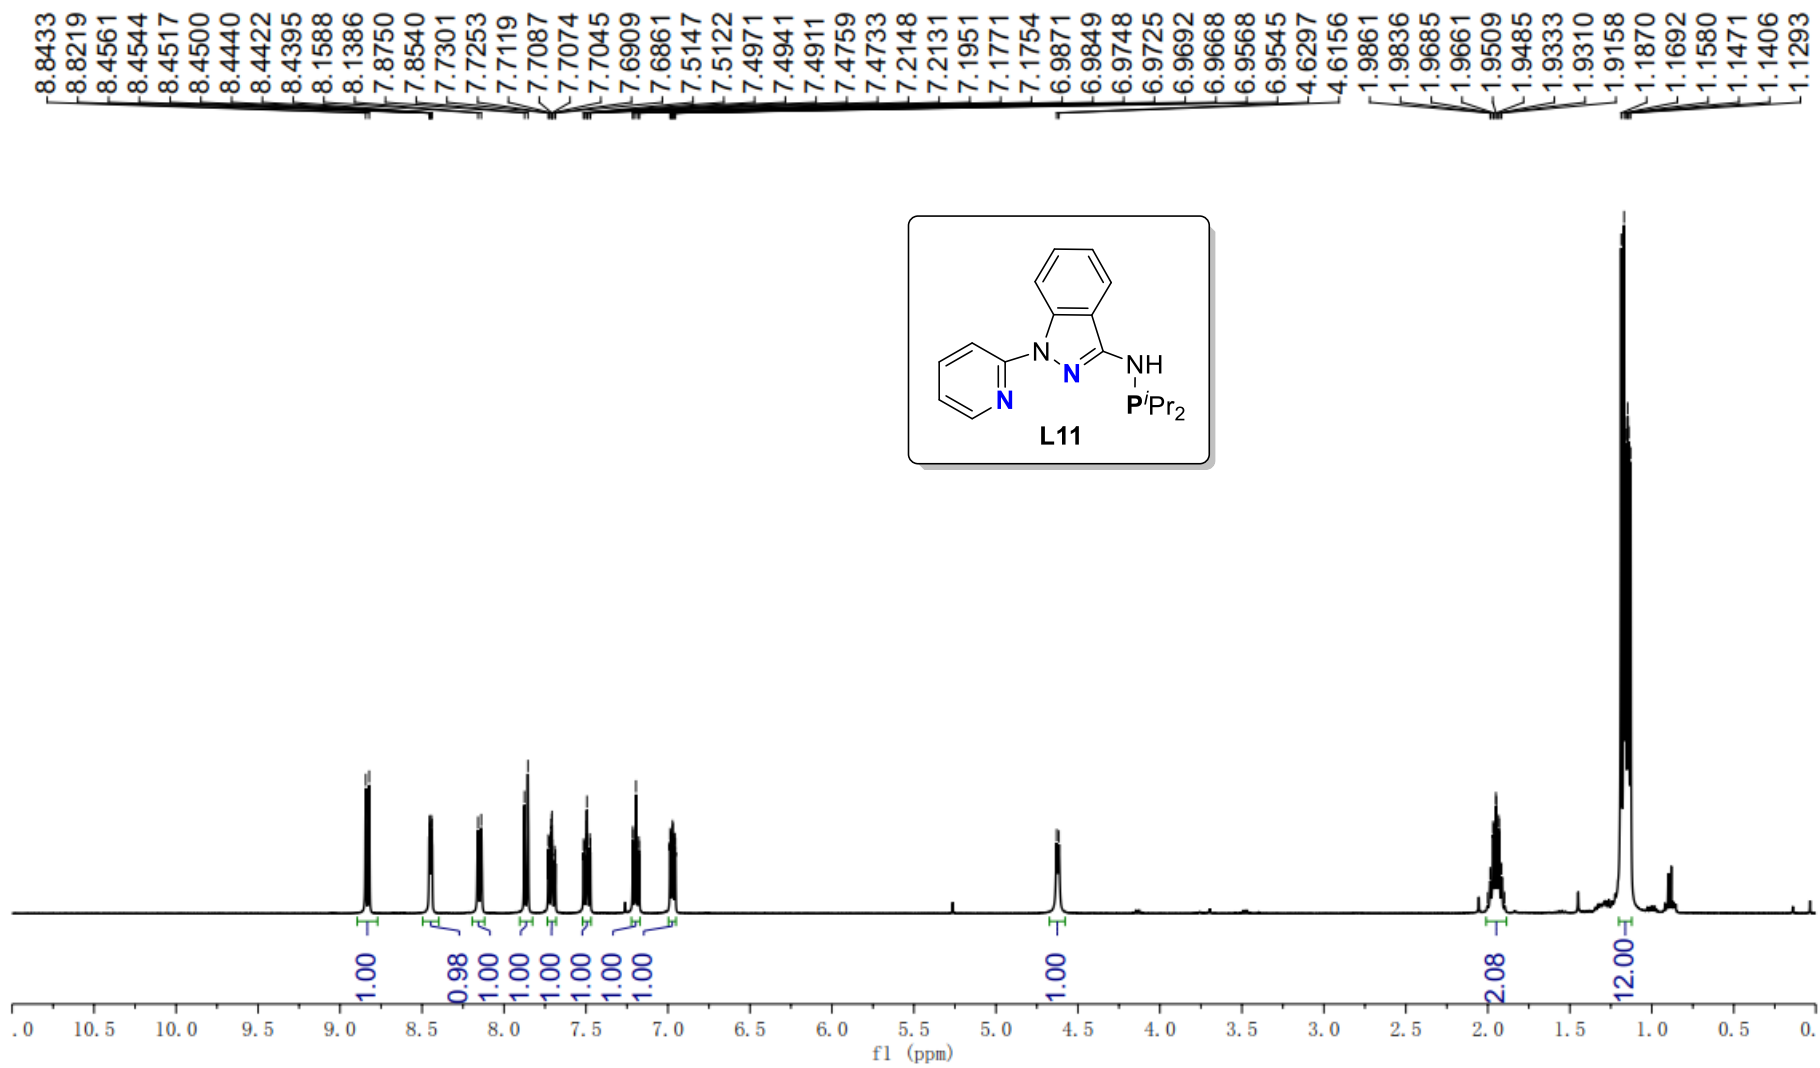



154.21  
151.32  
151.18  
147.37  
140.27  
137.67  
128.17  
121.48  
121.35  
120.70  
117.91  
117.86  
115.13  
112.27

26.79  
26.66  
18.83  
18.63  
17.25  
17.17

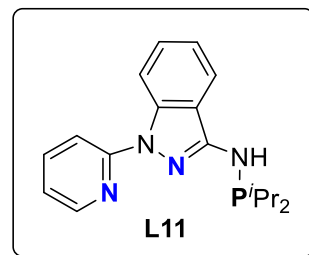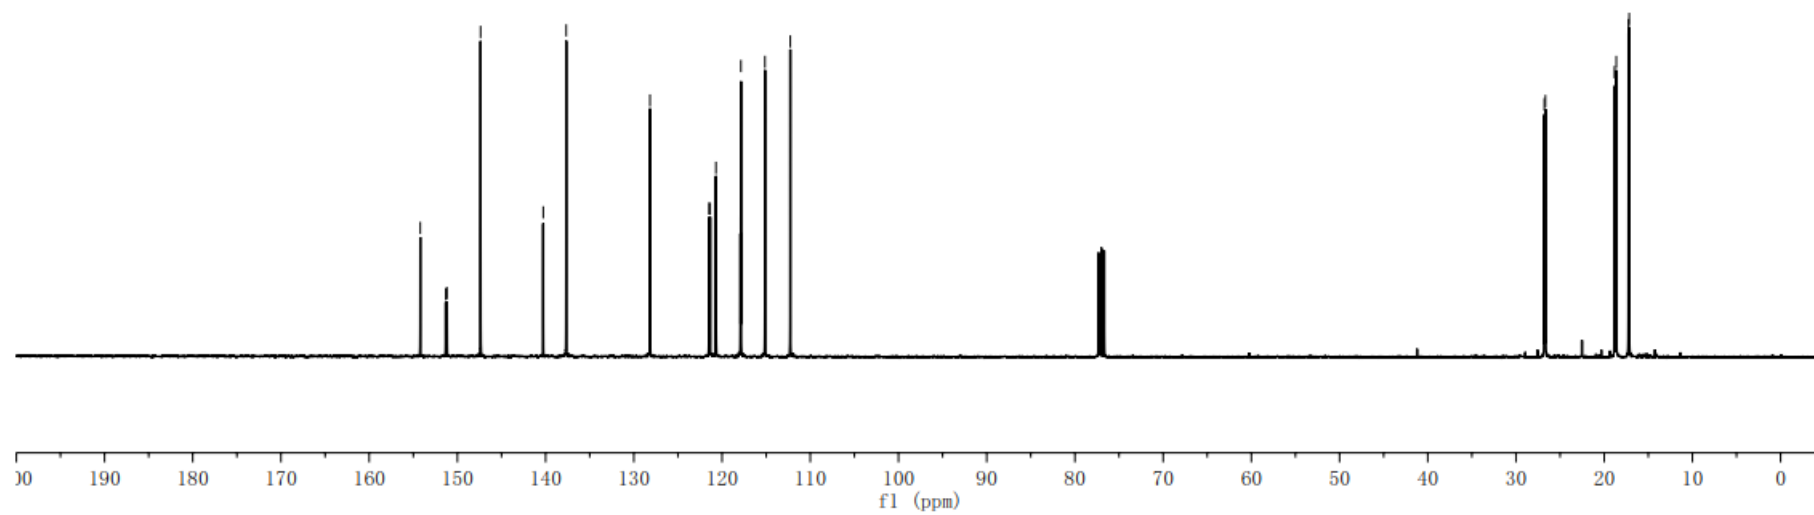

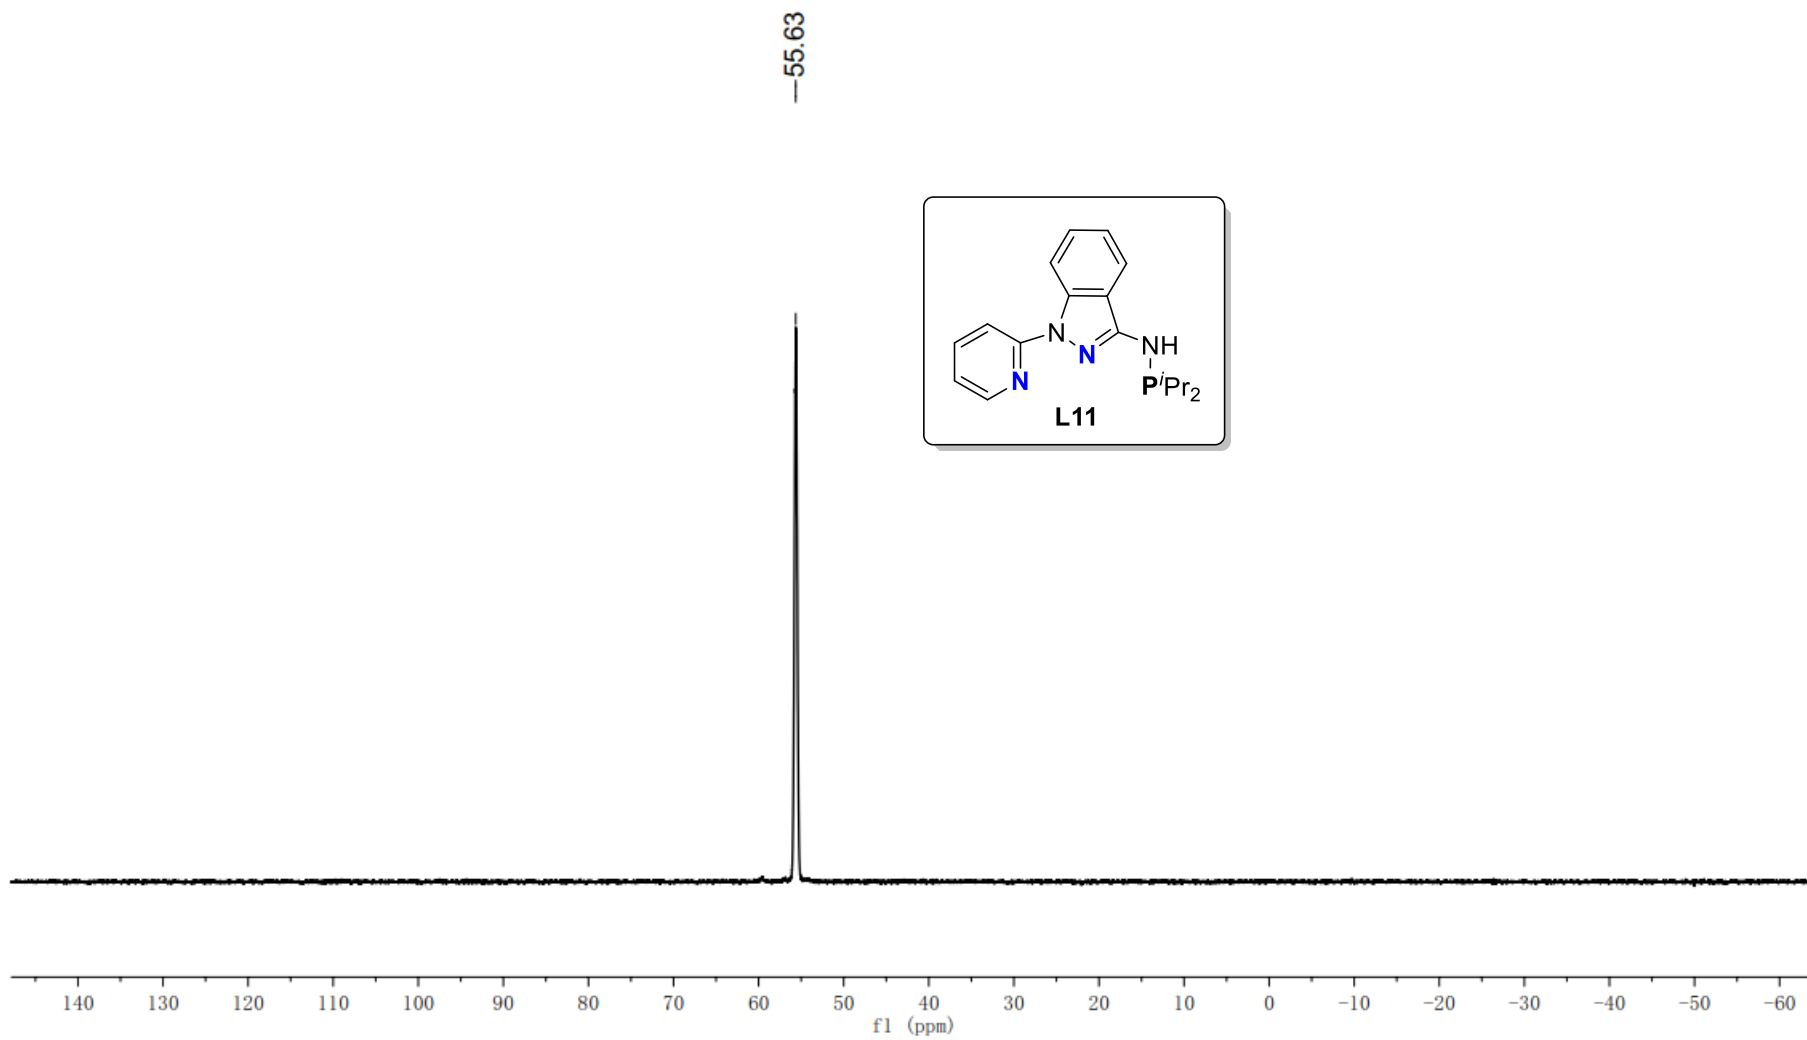

2022-11-28-616-lqq-d1

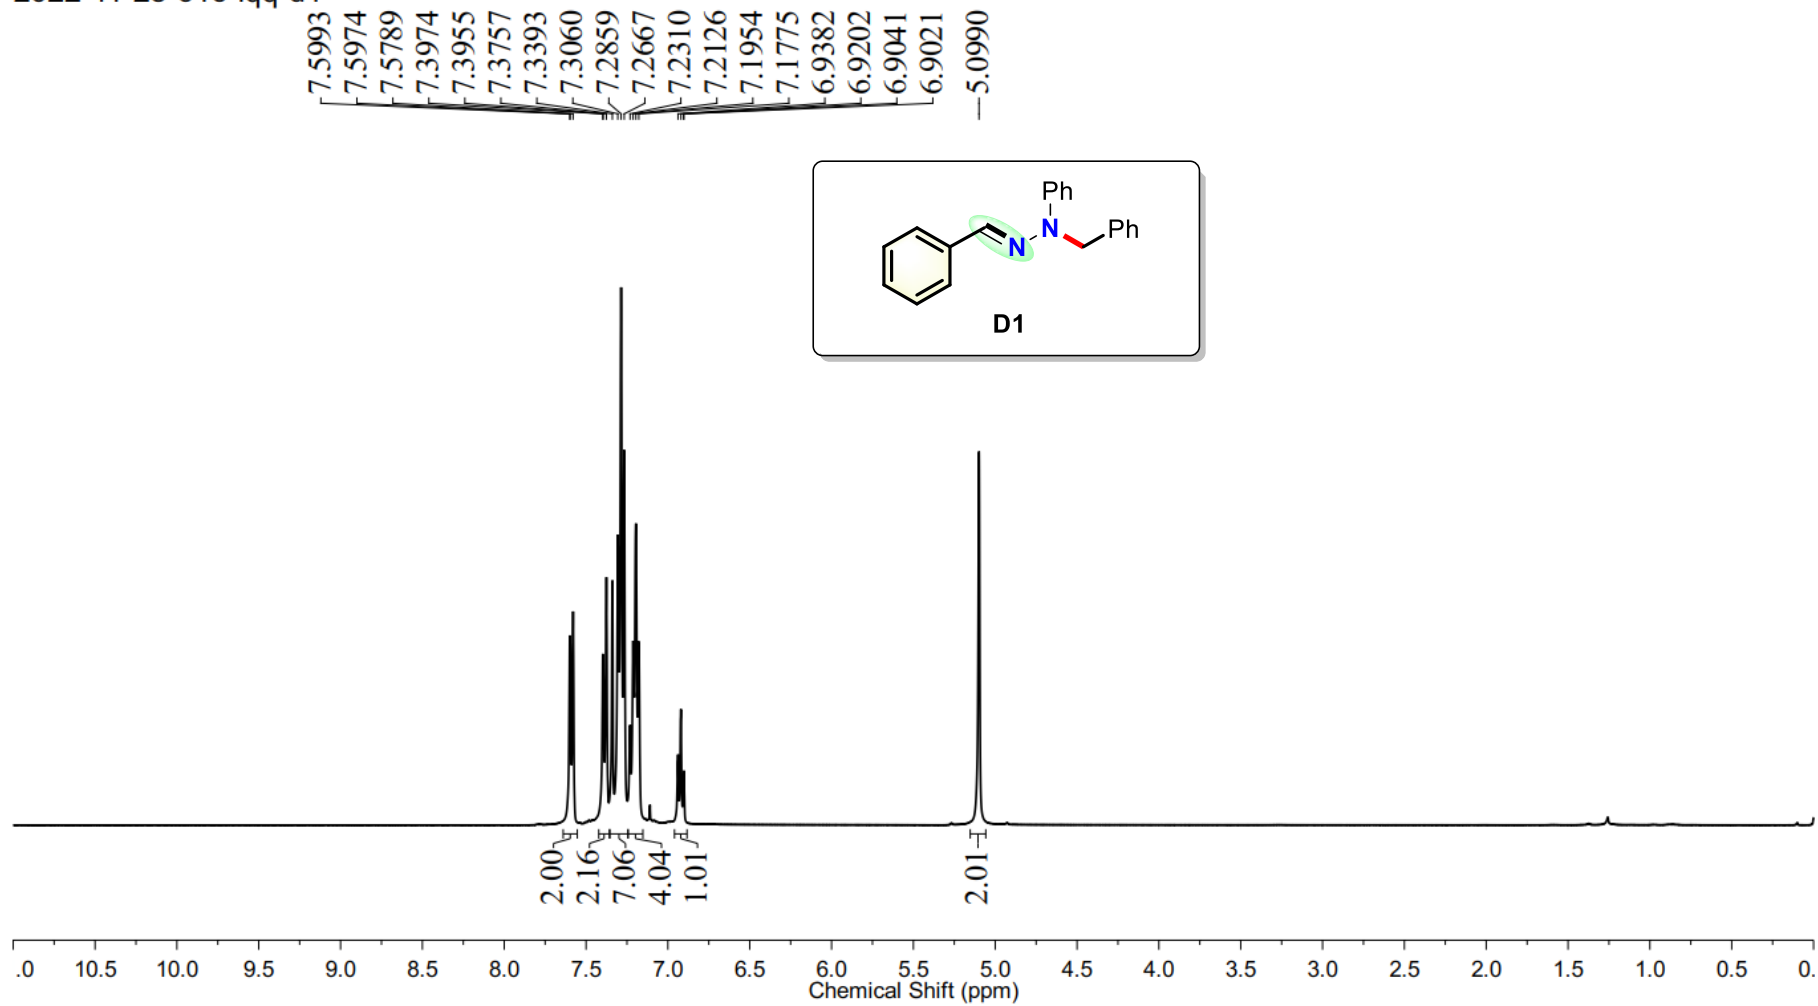

2022-12-02-yy0013-616-lqq-d1

147.99  
136.67  
135.78  
132.59  
129.33  
129.17  
128.68  
128.02  
127.45  
126.35  
126.17  
120.90  
114.92

77.56  
77.24  
76.92

50.48

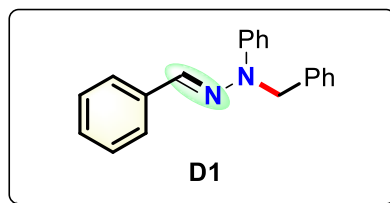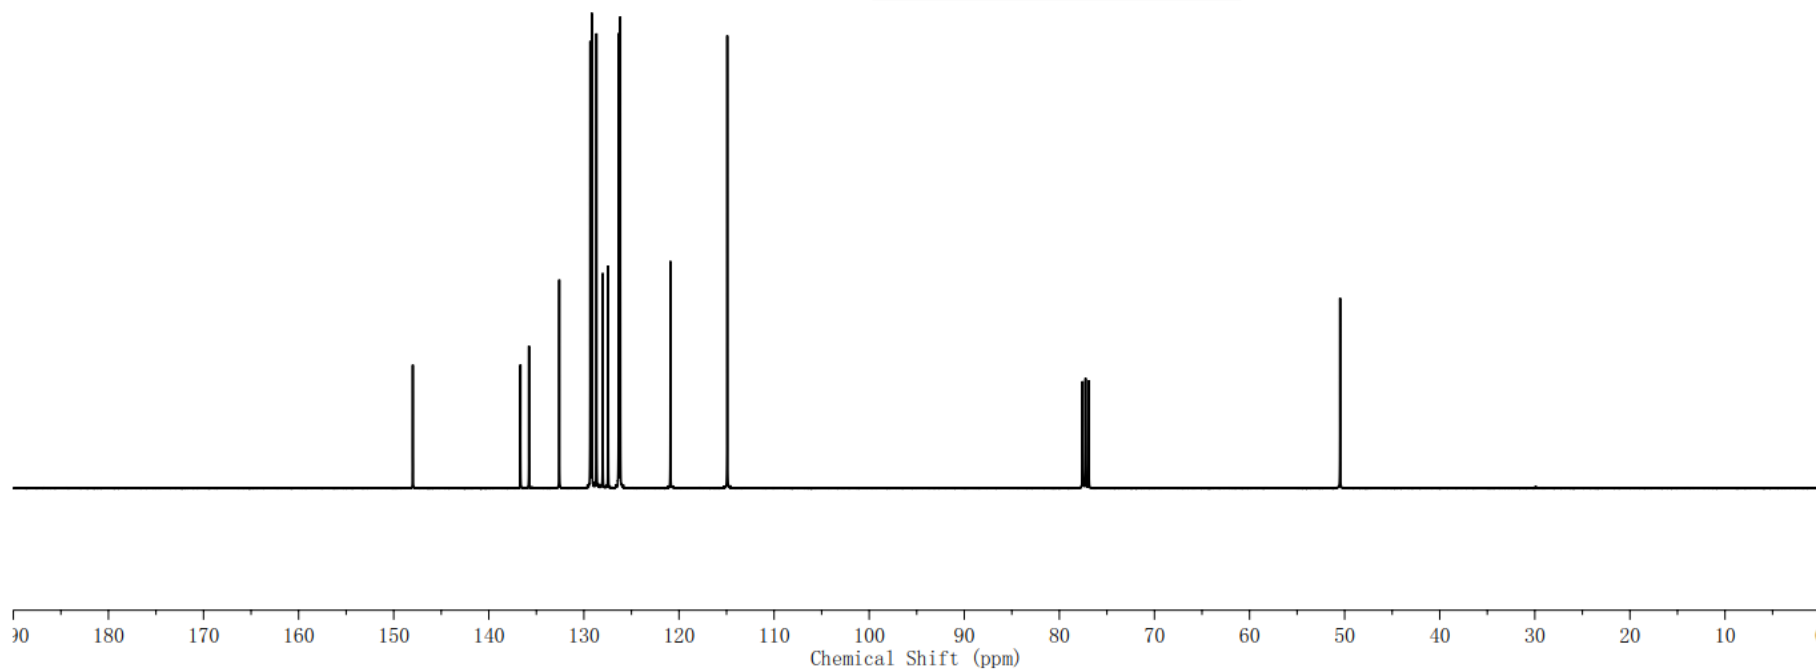

2022-5-5 yy0004-616-zq1-26-1

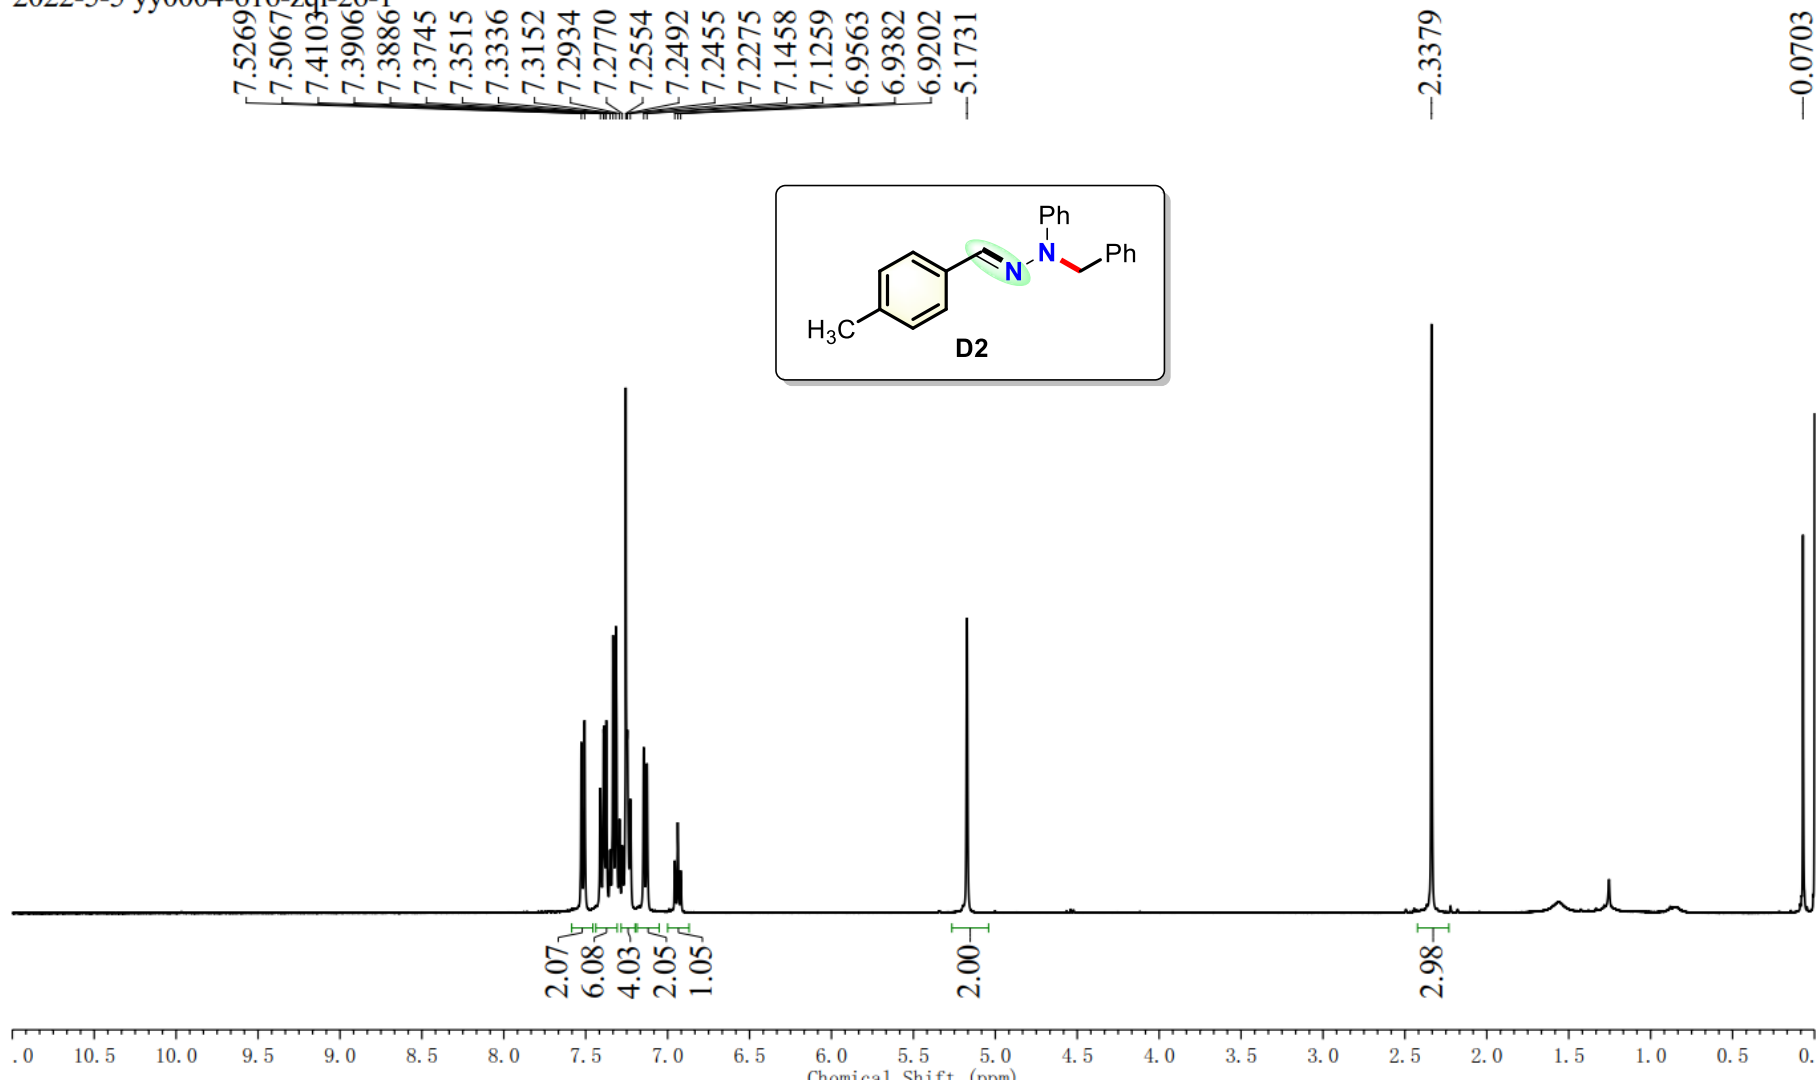

2022-5-6 yy0012-616-zql-26-1

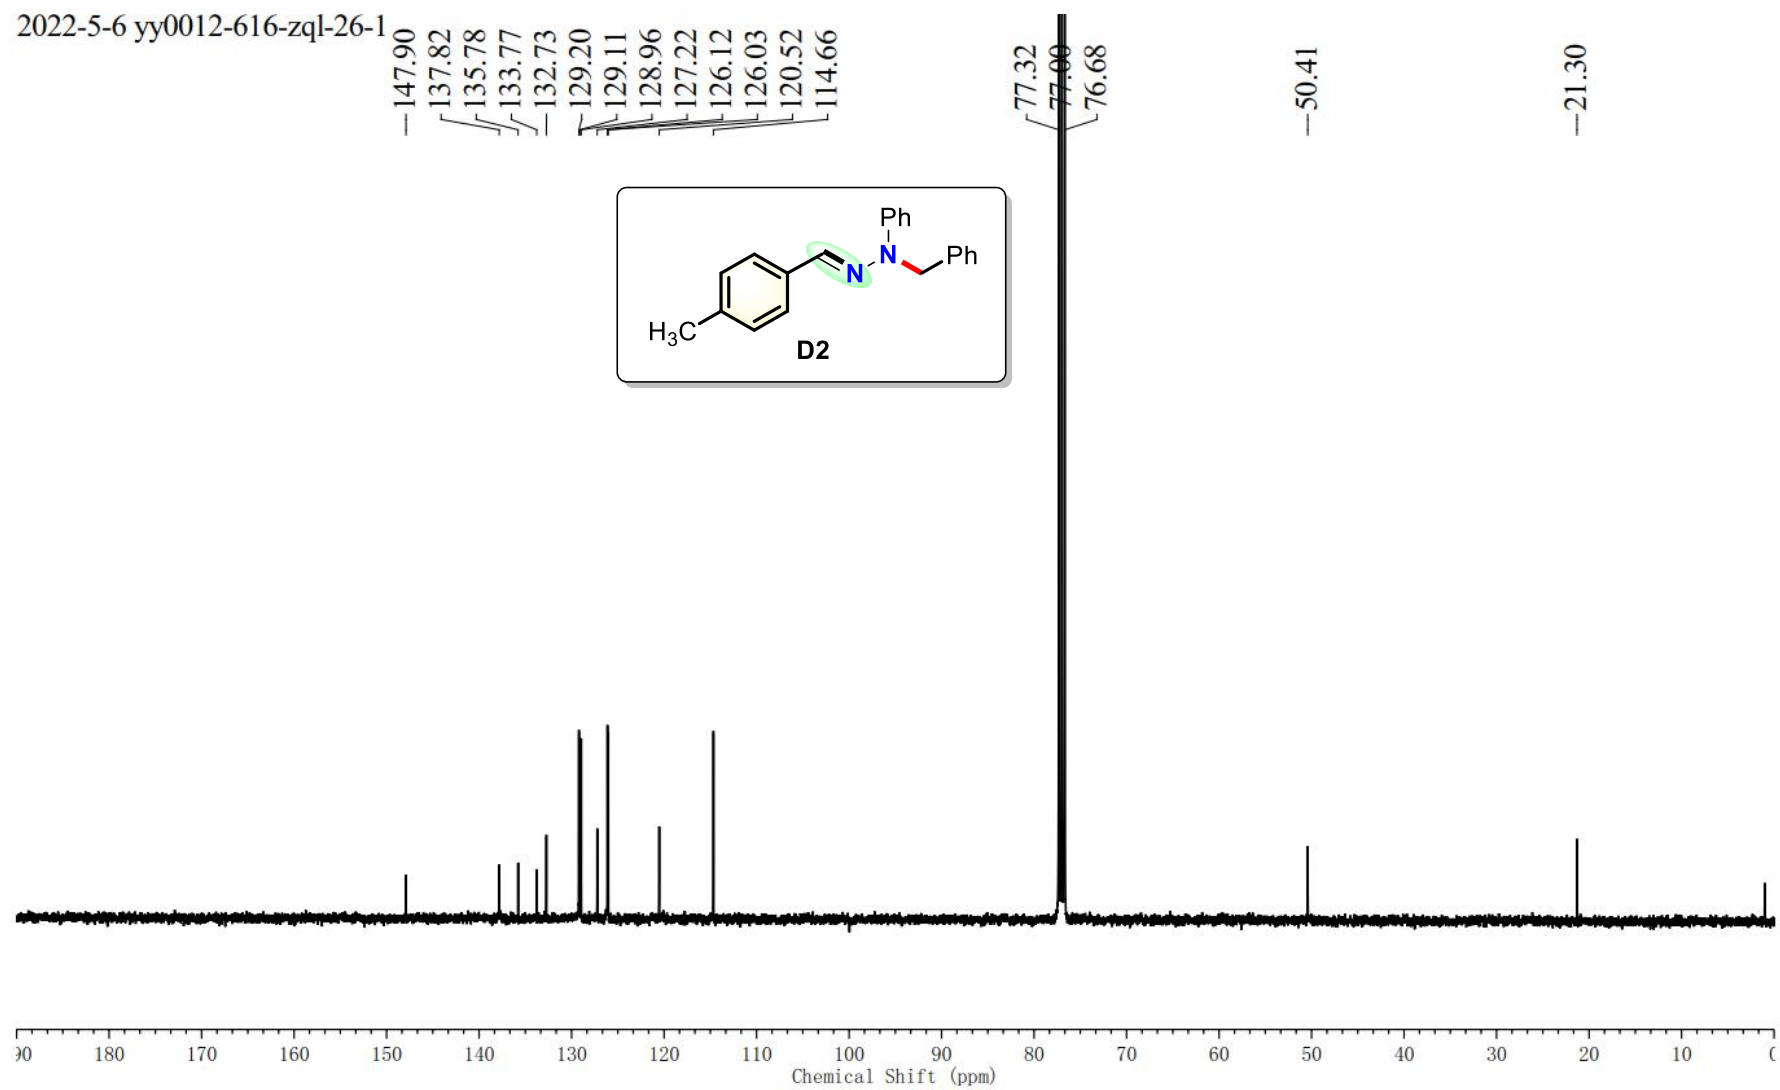

2022-05-14 YY0028-616-ZQL-1

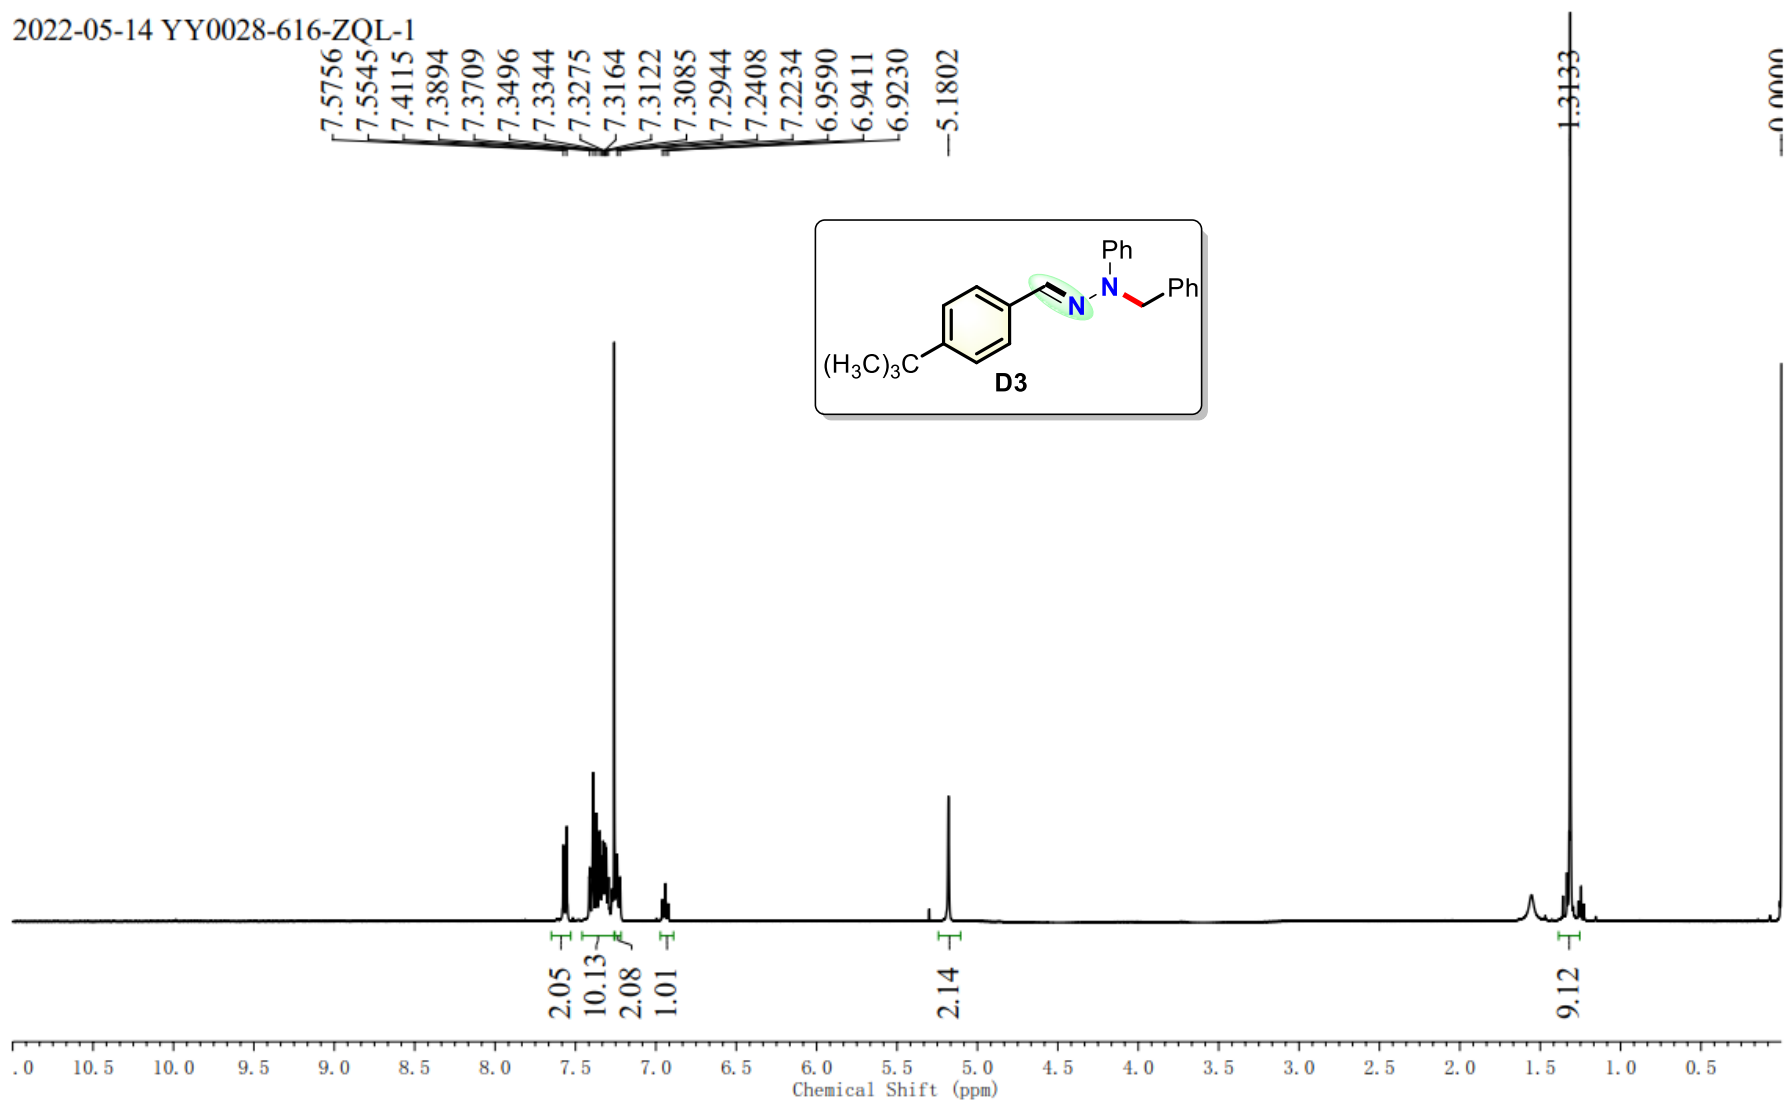

2022-05-16-yy0016-zql-1

151.11  
147.92  
135.72  
133.81  
132.63  
129.13  
128.97  
127.24  
126.07  
125.94  
125.46  
120.56  
114.72  
77.34  
77.02  
76.71  
50.35  
34.66  
31.28

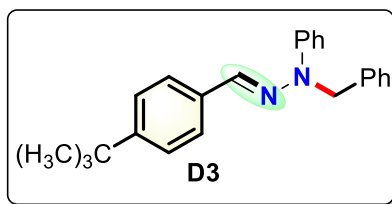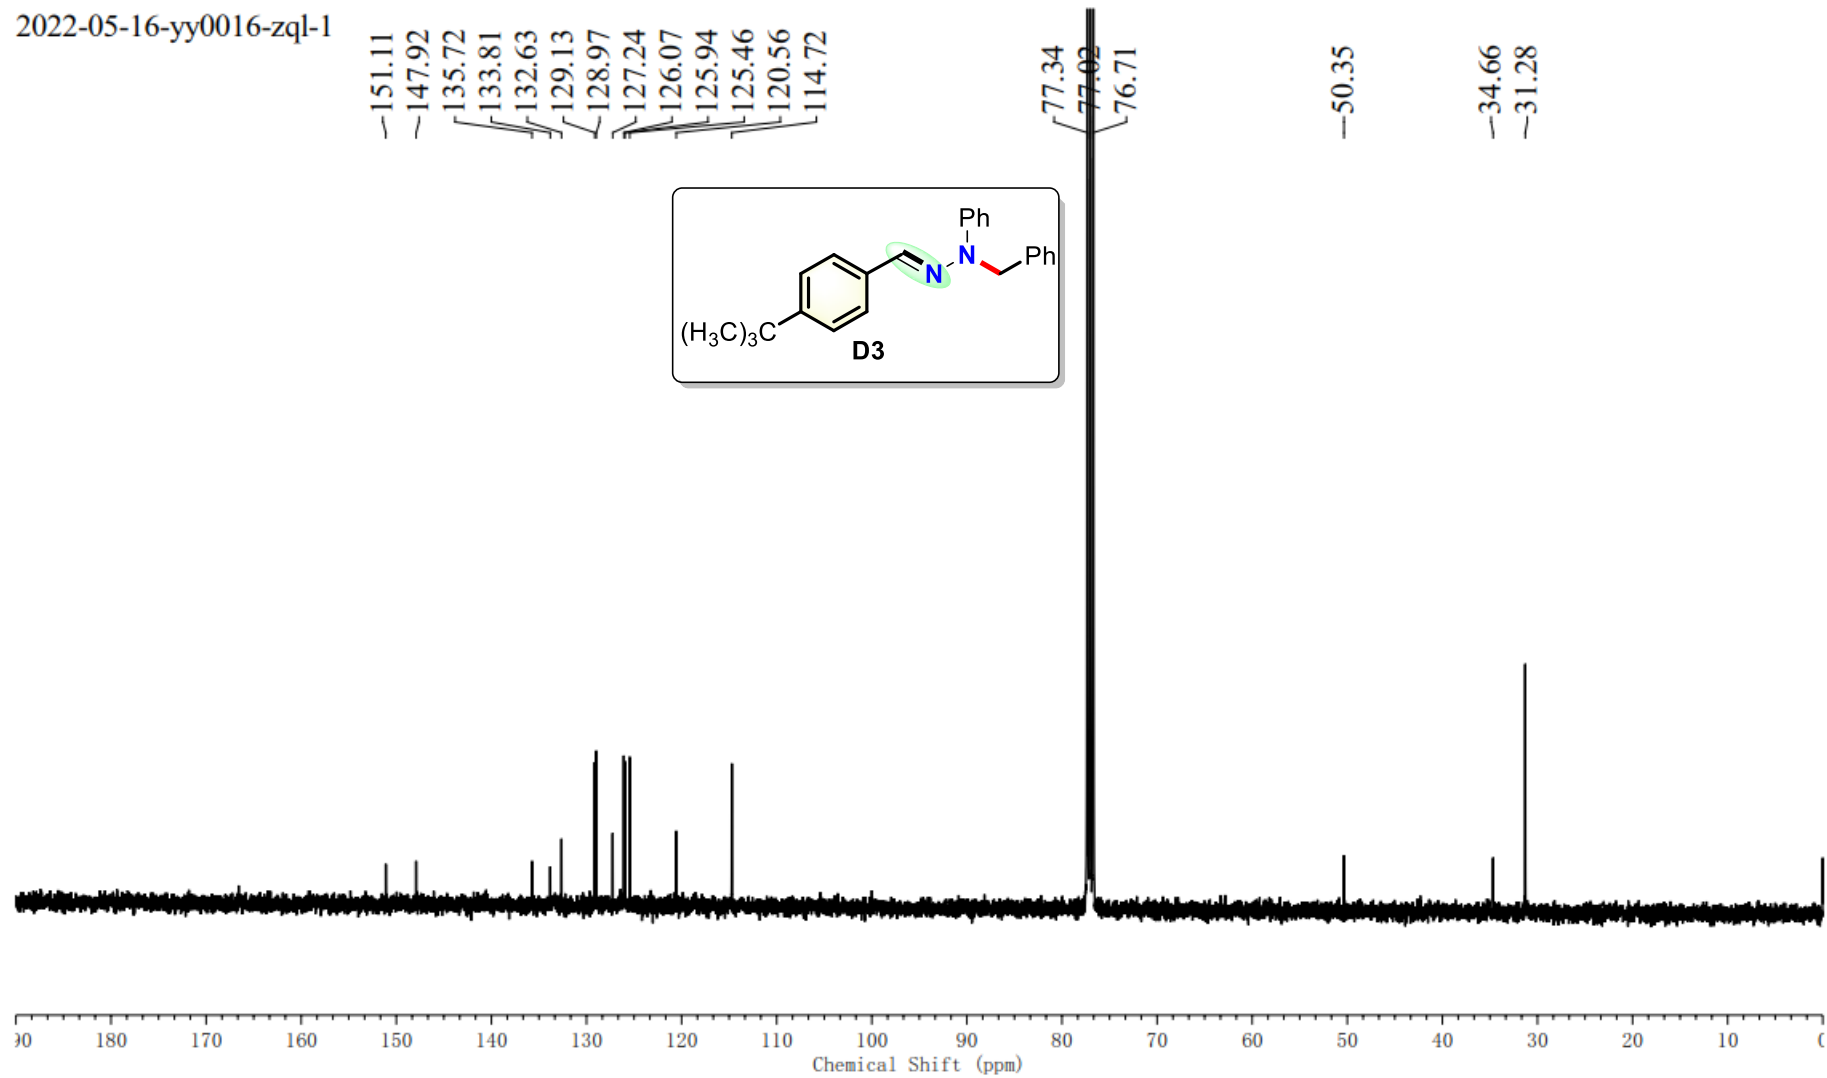



2022-5-7 yy0007-616-zql-1

7.7276  
7.7233  
7.3866  
7.3715  
7.3661  
7.3567  
7.3399  
7.3352  
7.3206  
7.3092  
7.2947  
7.2711  
7.2558  
7.2443  
7.2385  
7.2293  
7.2197  
6.5159  
6.5115

4.5650

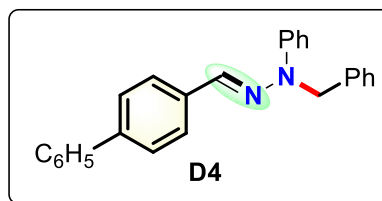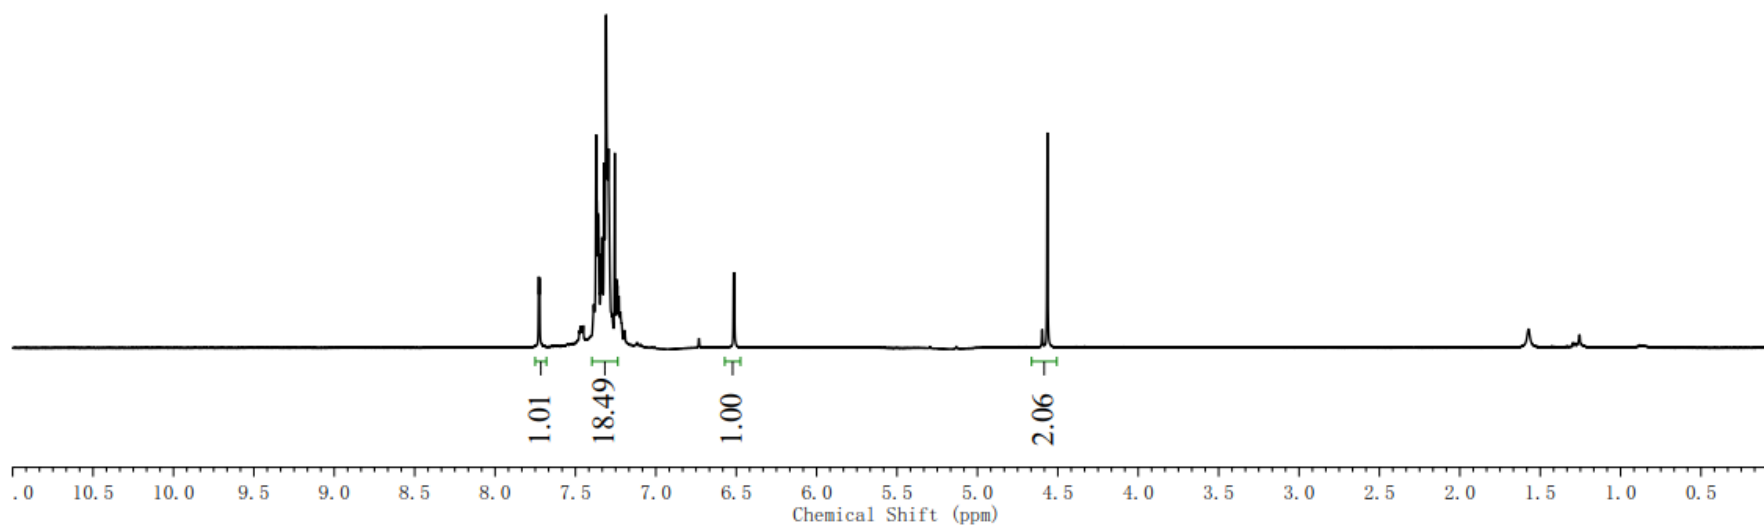

2022-05-10 YY0042-616-zql-2

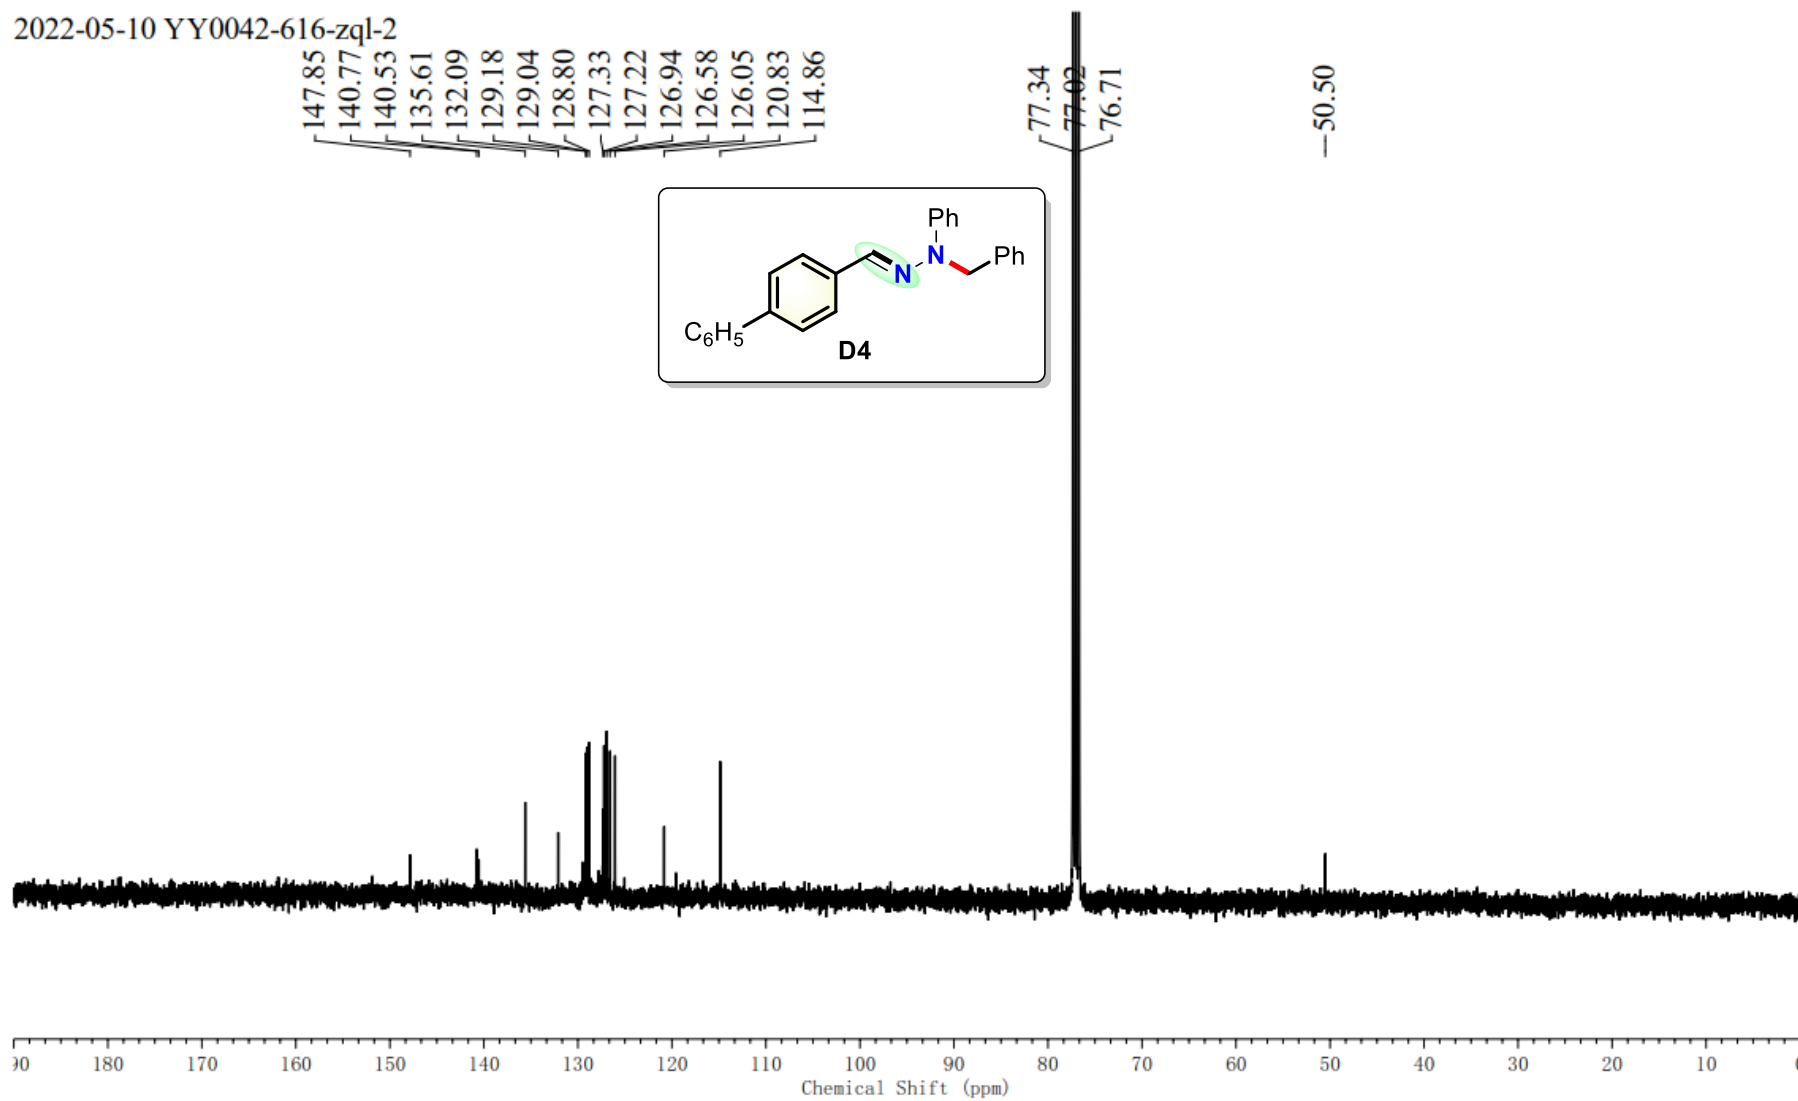

2022-5-7 yy0007-616-zql-7

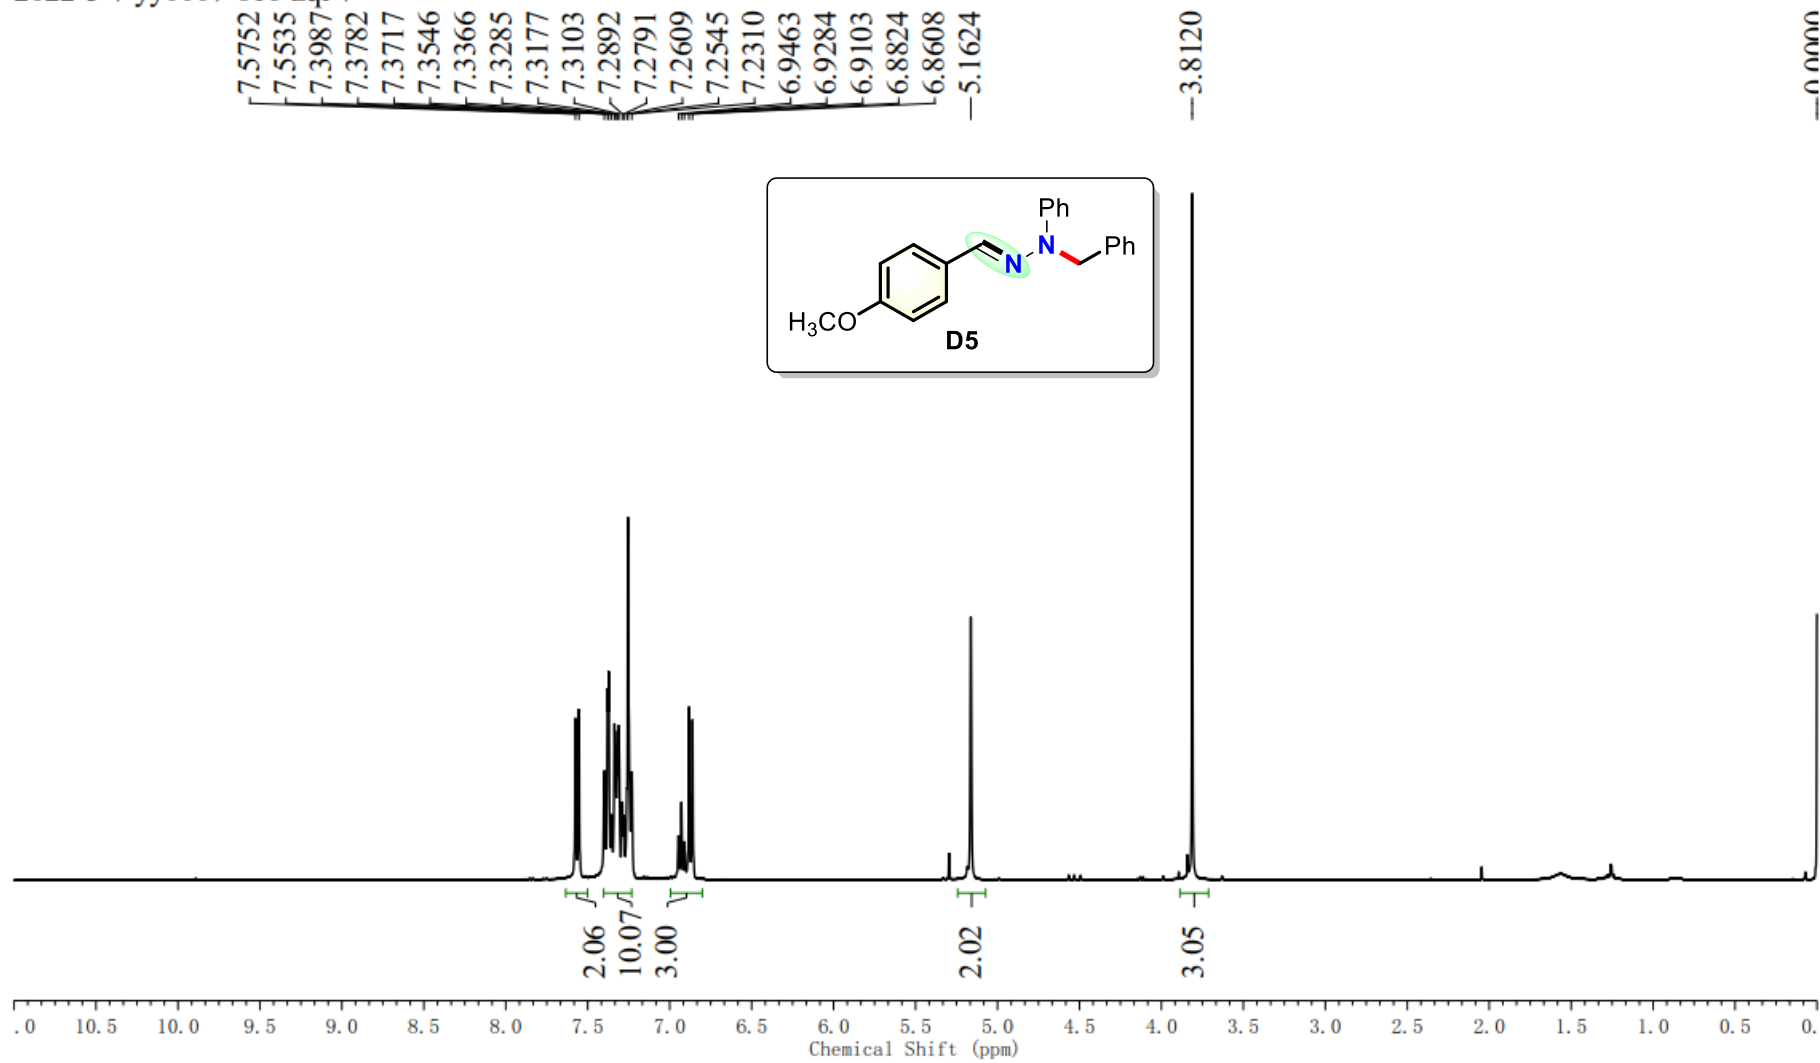

2022-05-10 YY0018-616-zql-7

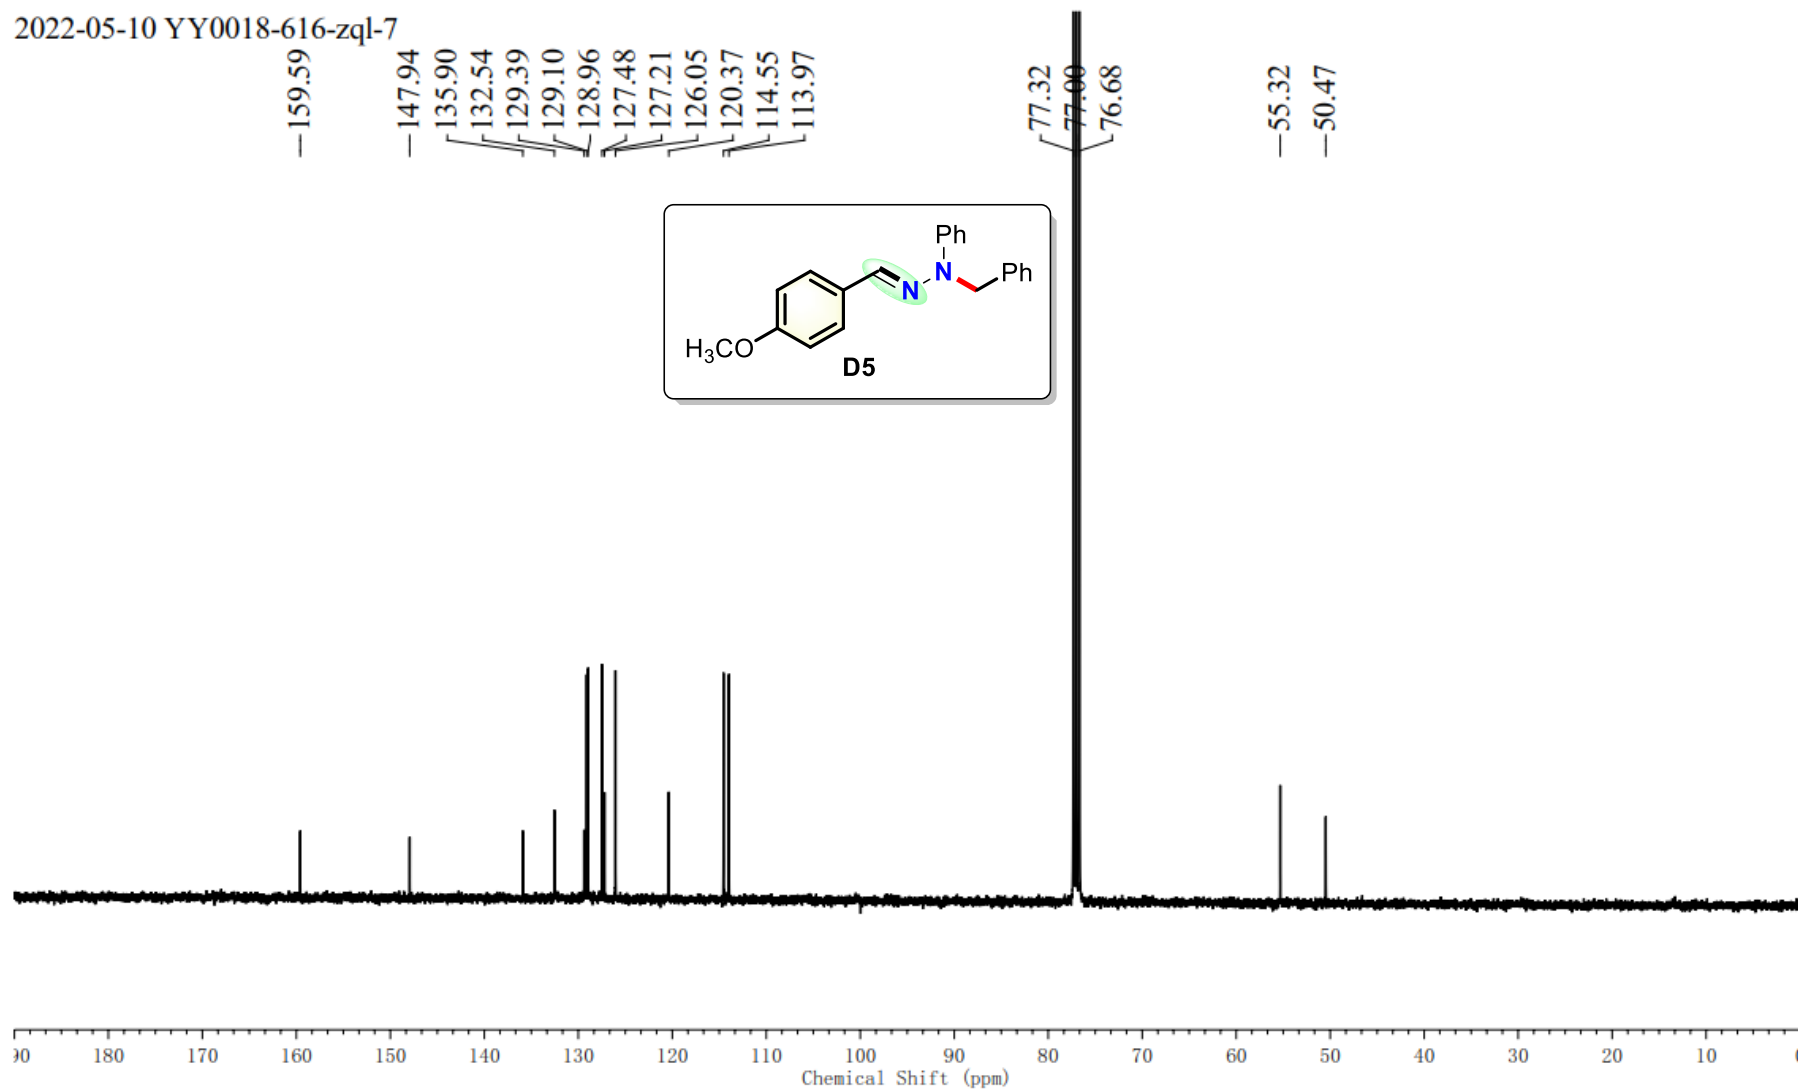

2022-5-7 yy0007-616-zql-4

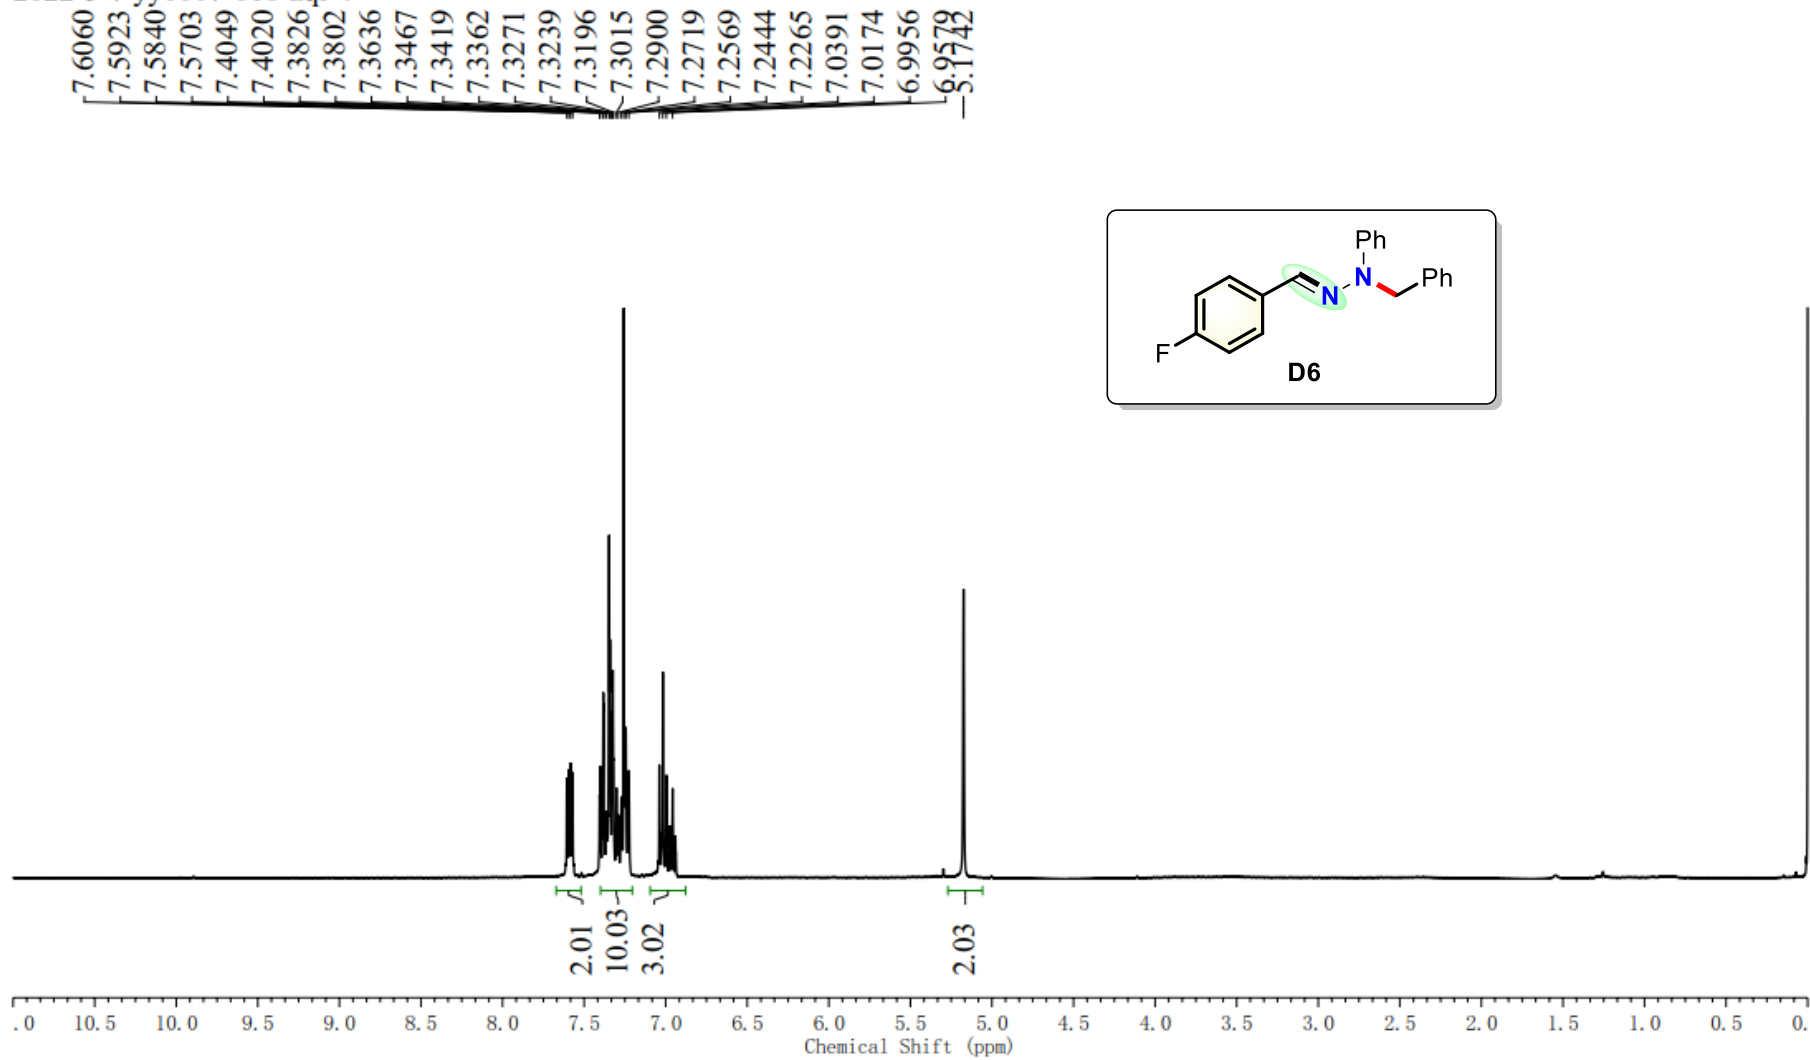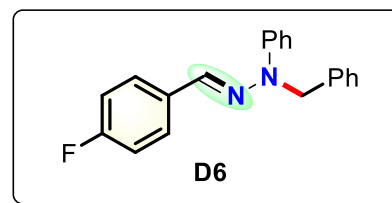

2022-05-10 YY0018-616-zql-4

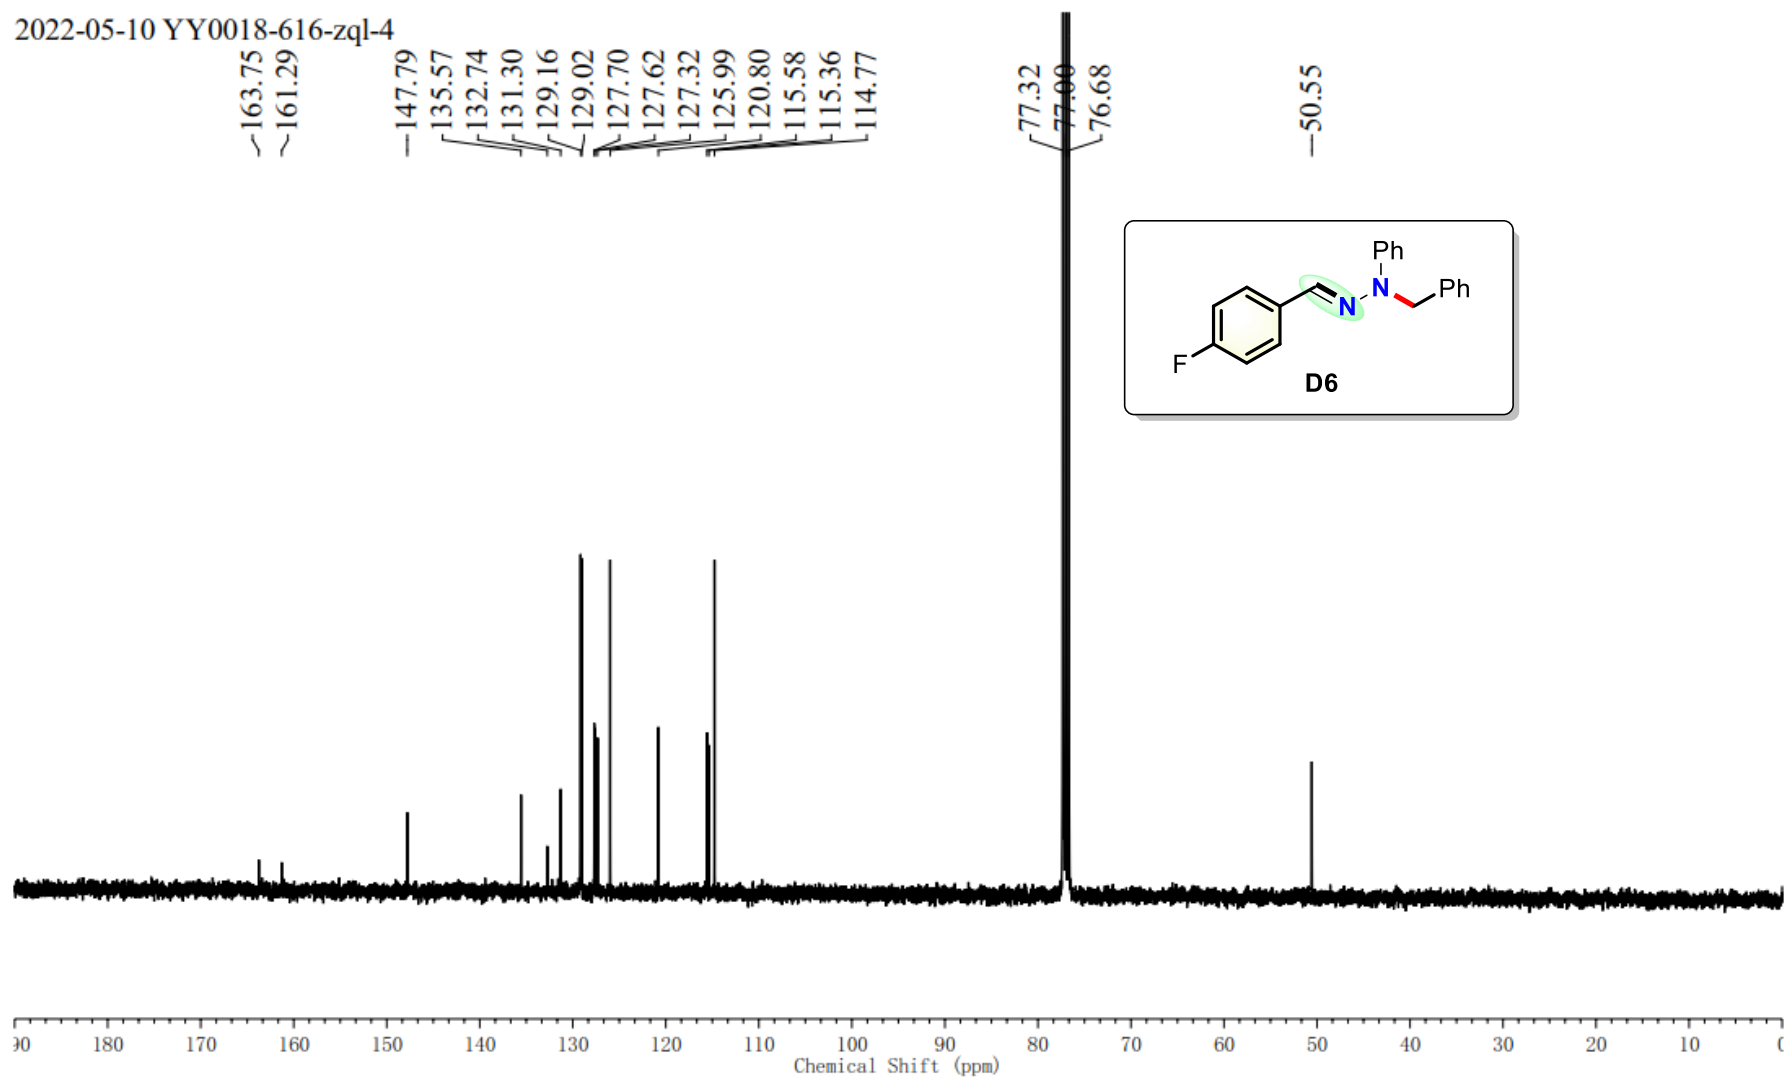

2022-05-10 YY0043-616-lqq-4

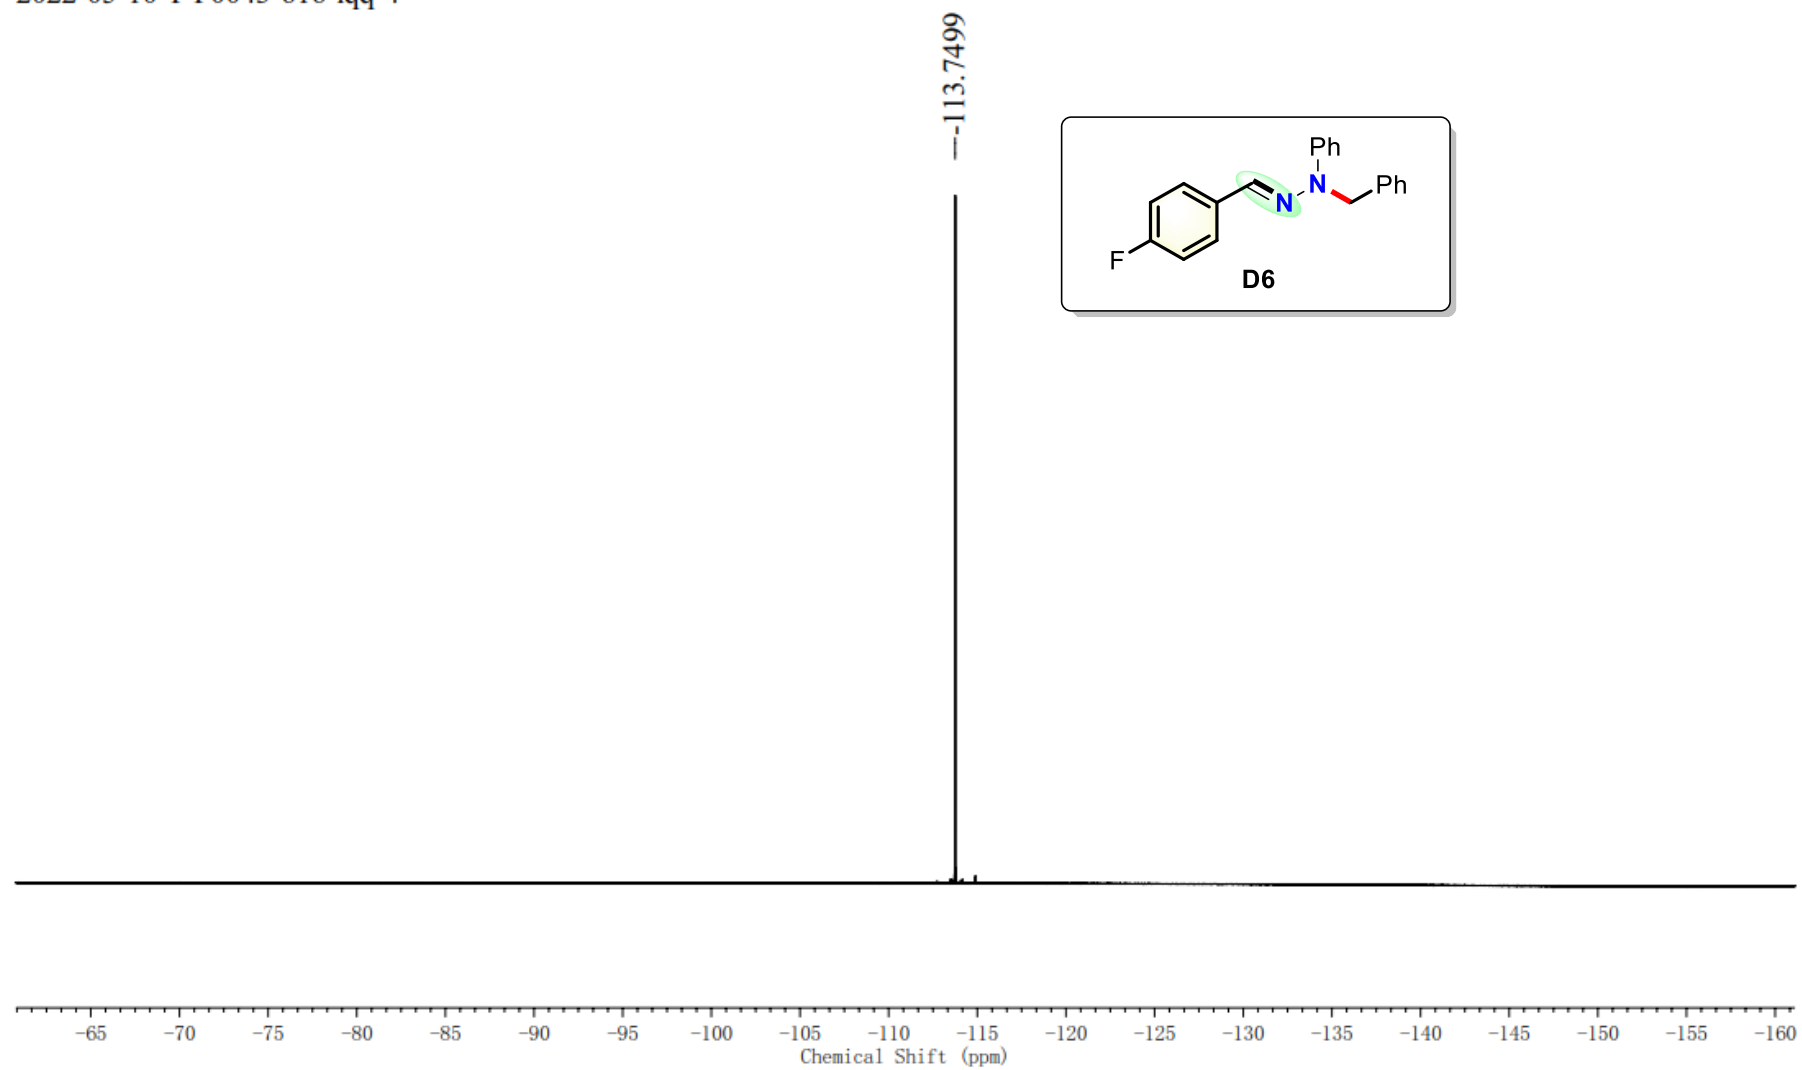

2022-5-7 yy0007-616-zql-10

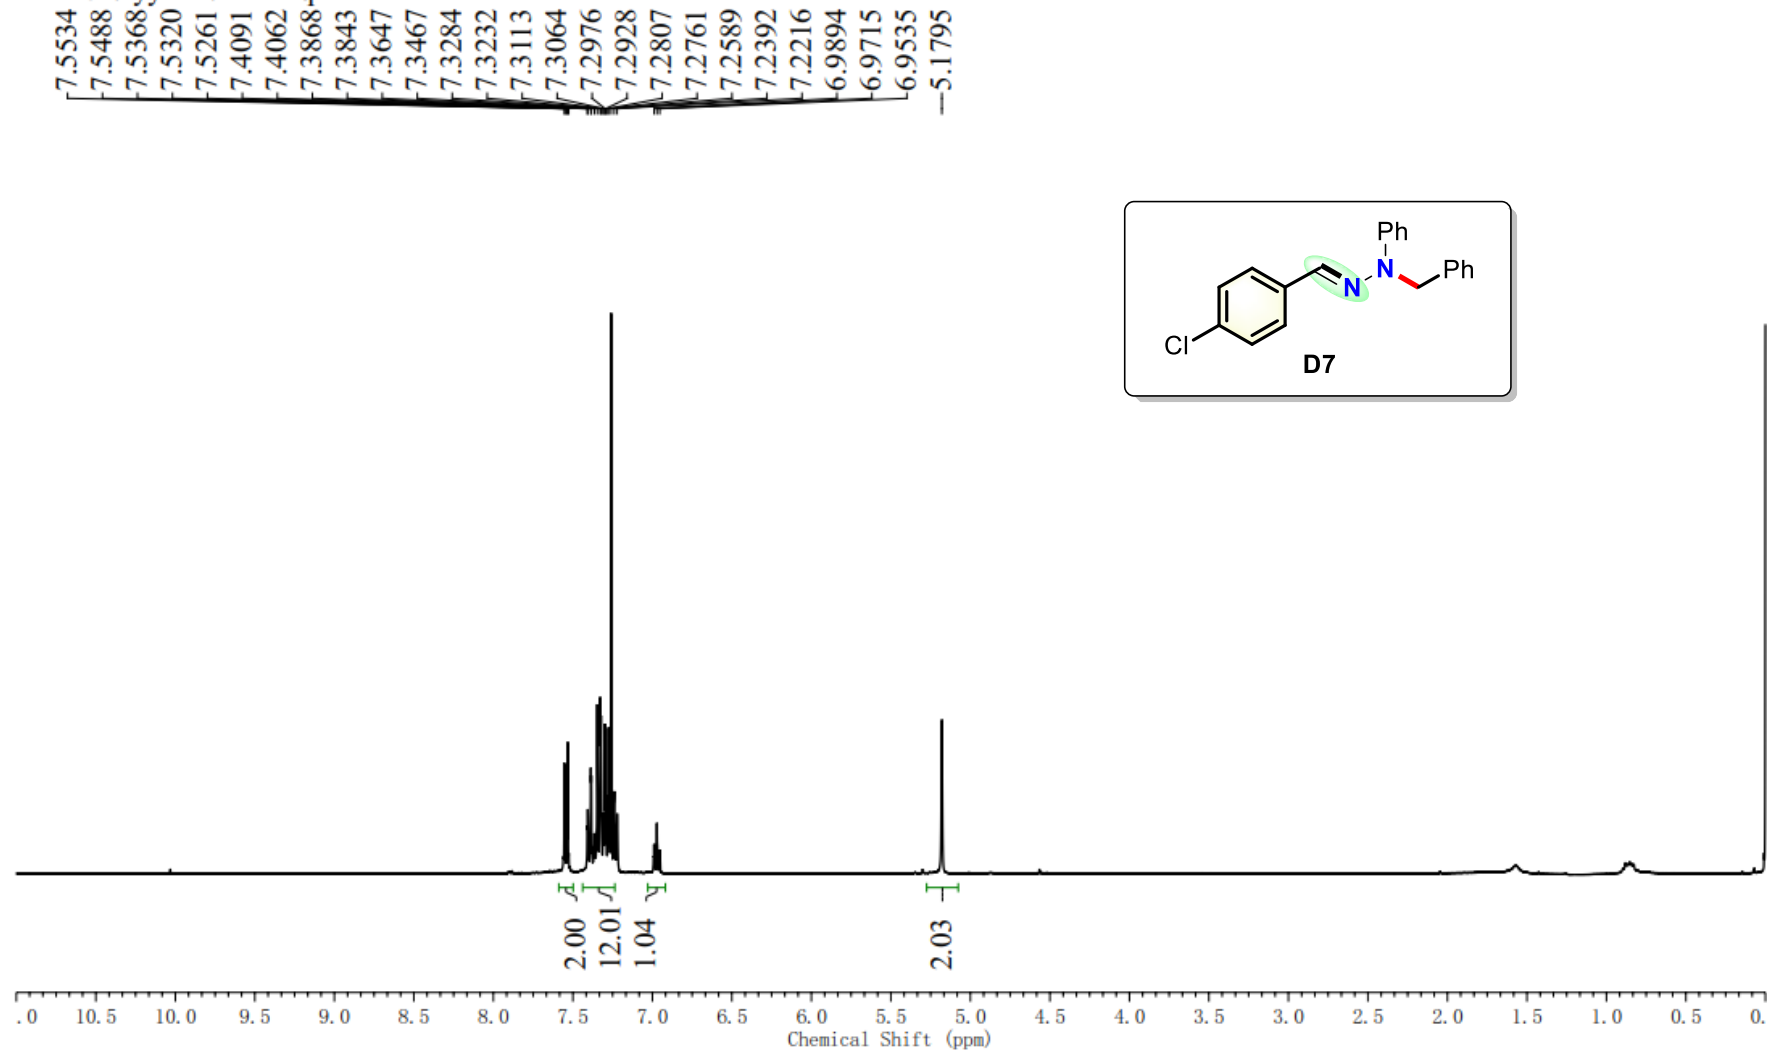



2022-05-10 YY0018-616-zql-10

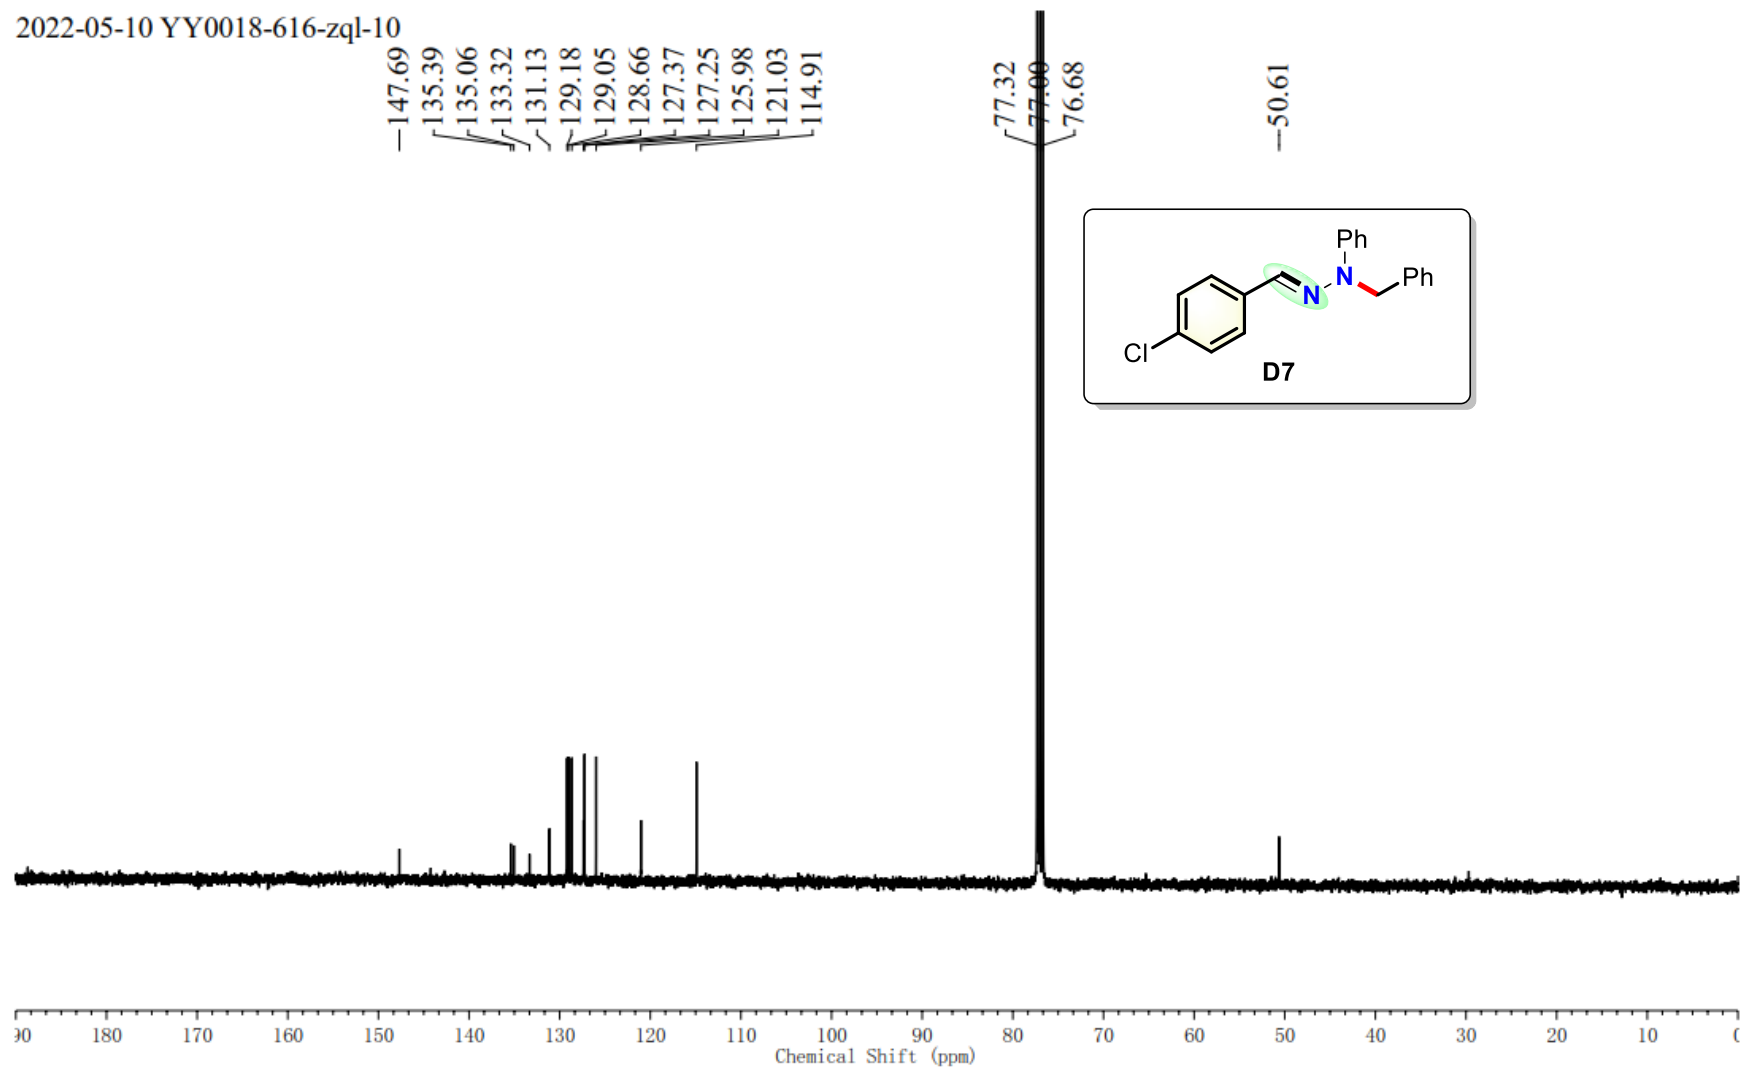

2022-05-10 YY0015-616-zql-1

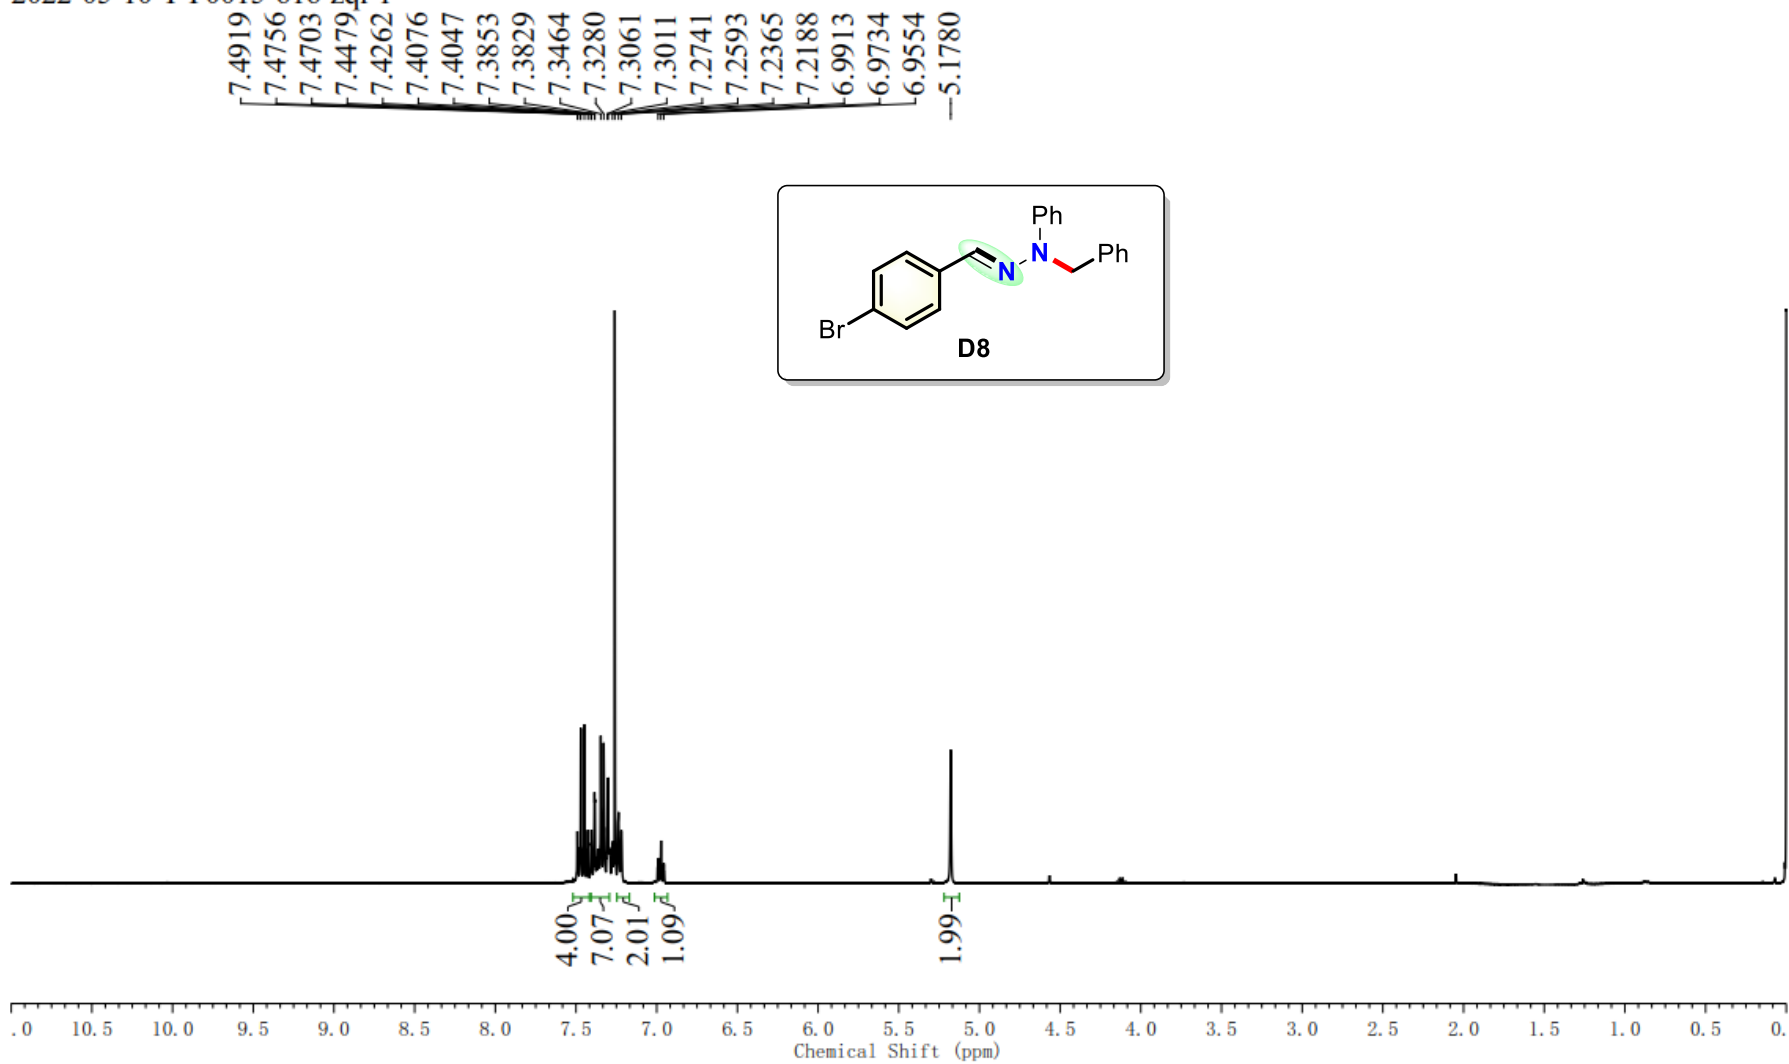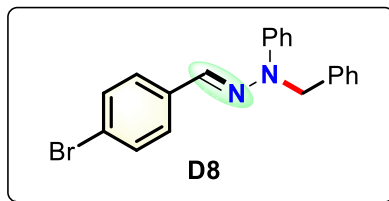

2022-05-14 YY0016-616-ZQL-1

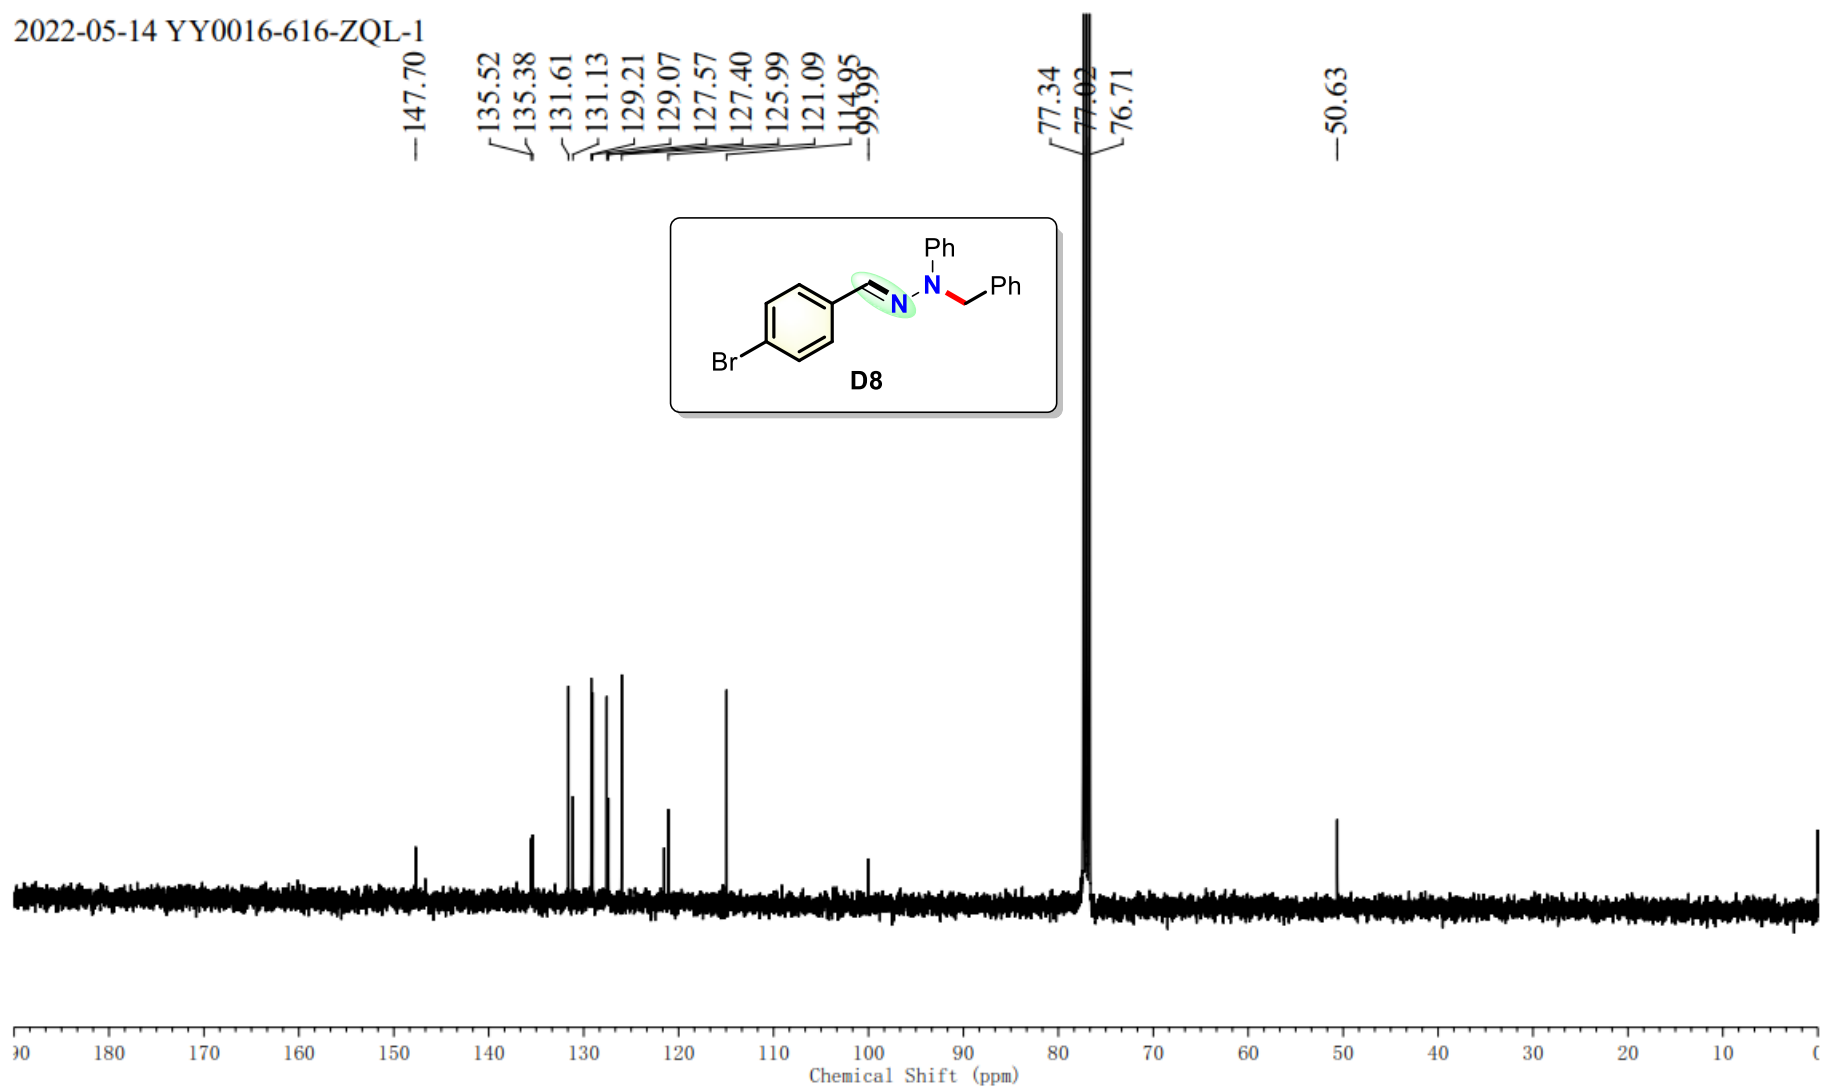

2022-05-10 YY0015-616-zql-4

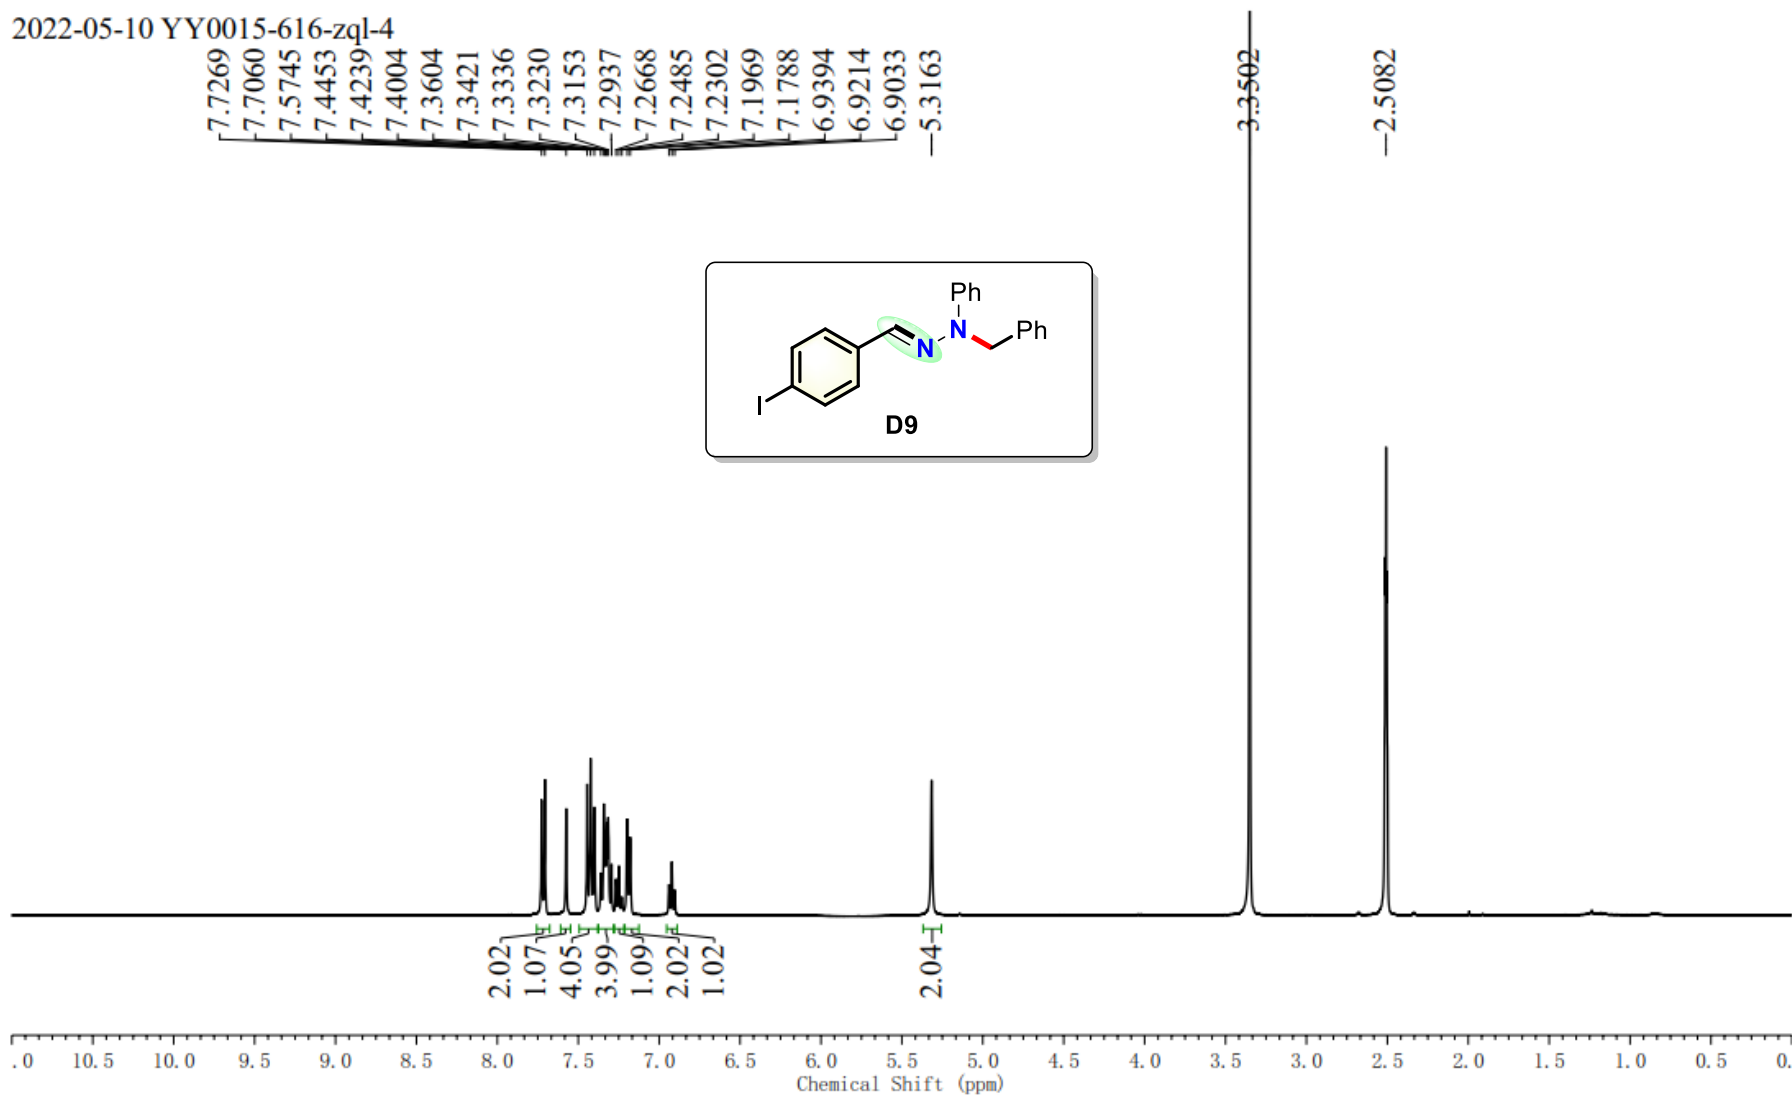

2022-05-14 YY0016-616-ZQL-4

147.42  
137.86  
136.38  
136.22  
132.02  
129.68  
129.24  
128.30  
127.48  
126.70  
120.93  
114.71

94.11

48.67  
40.61  
40.40  
40.19  
39.98  
39.77  
39.56  
39.36

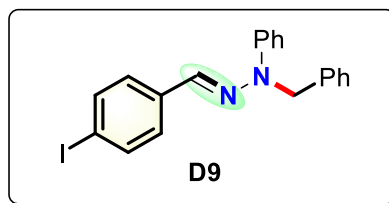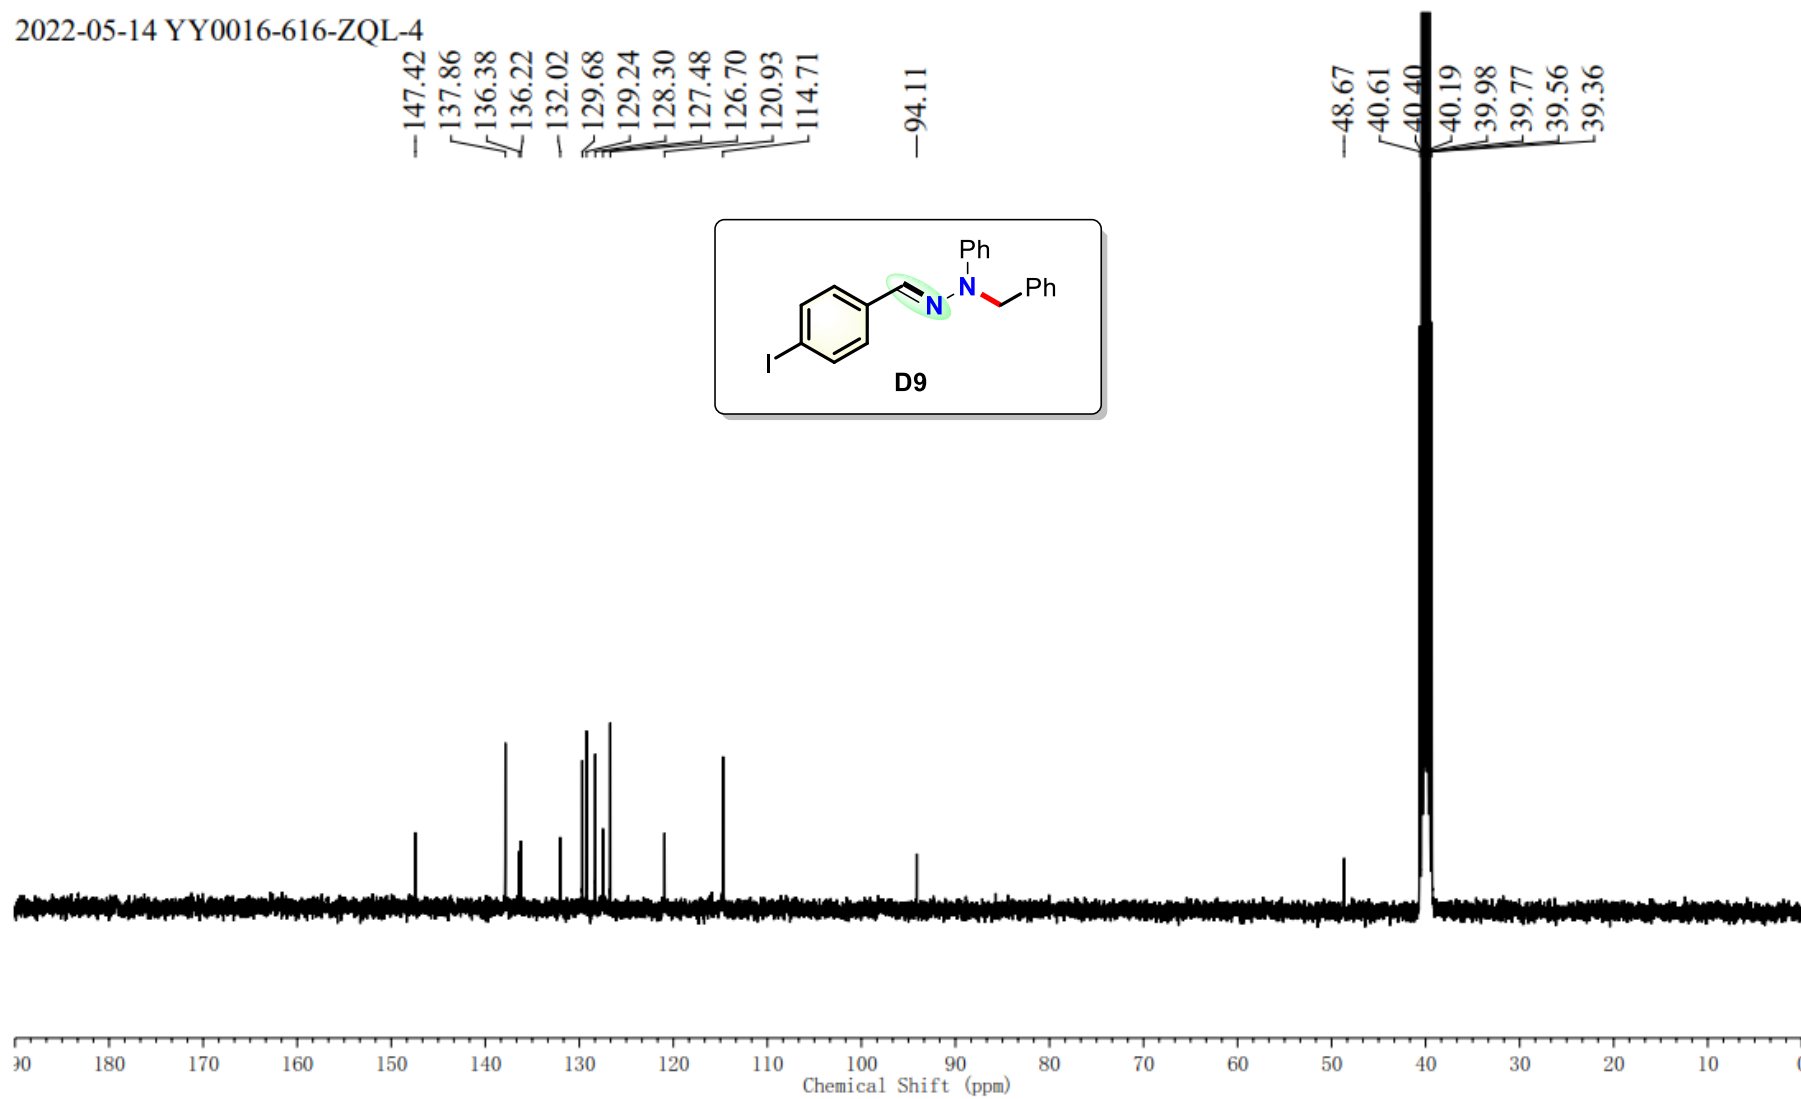

2022-11-7-yy0025-616-e20

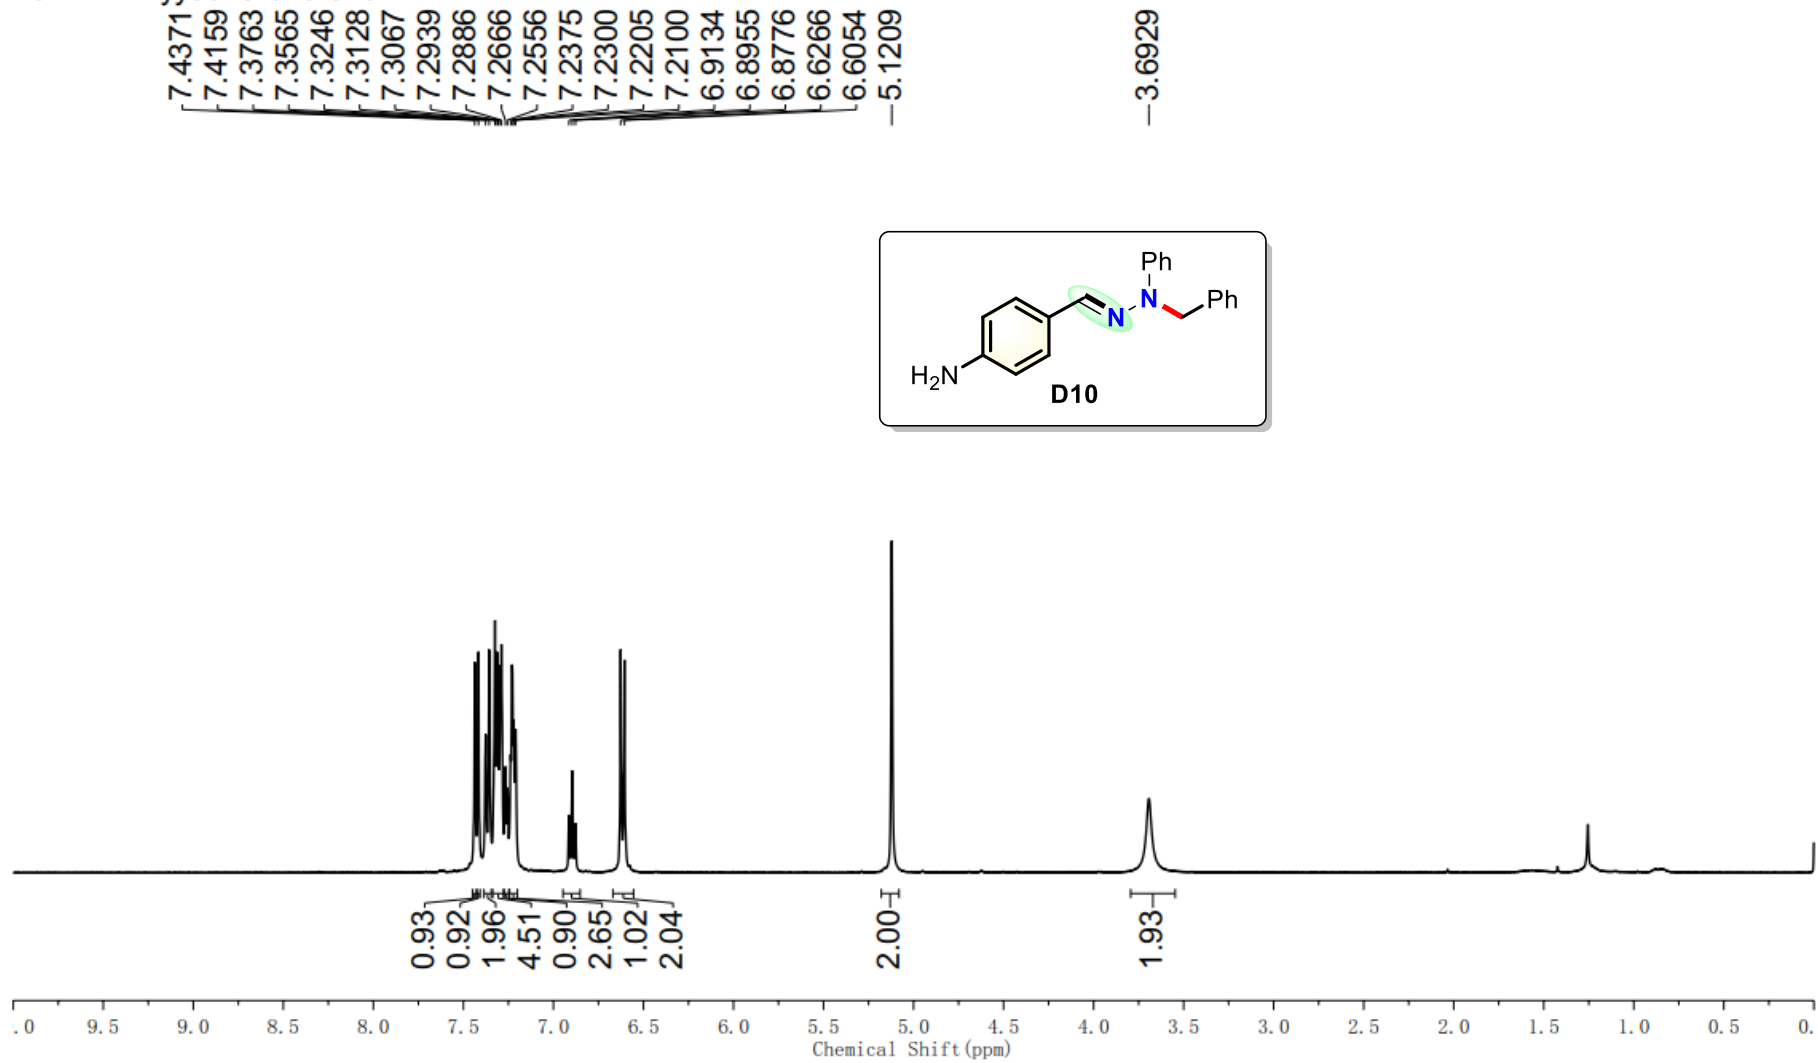

2022-11-10-yy0031-616-E20

148.12  
146.57  
136.21  
133.29  
129.14  
128.98  
127.60  
127.30  
127.20  
126.11  
120.10  
115.05  
114.42

77.41  
77.09  
76.78

50.41

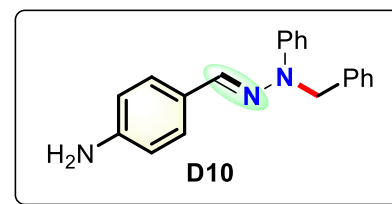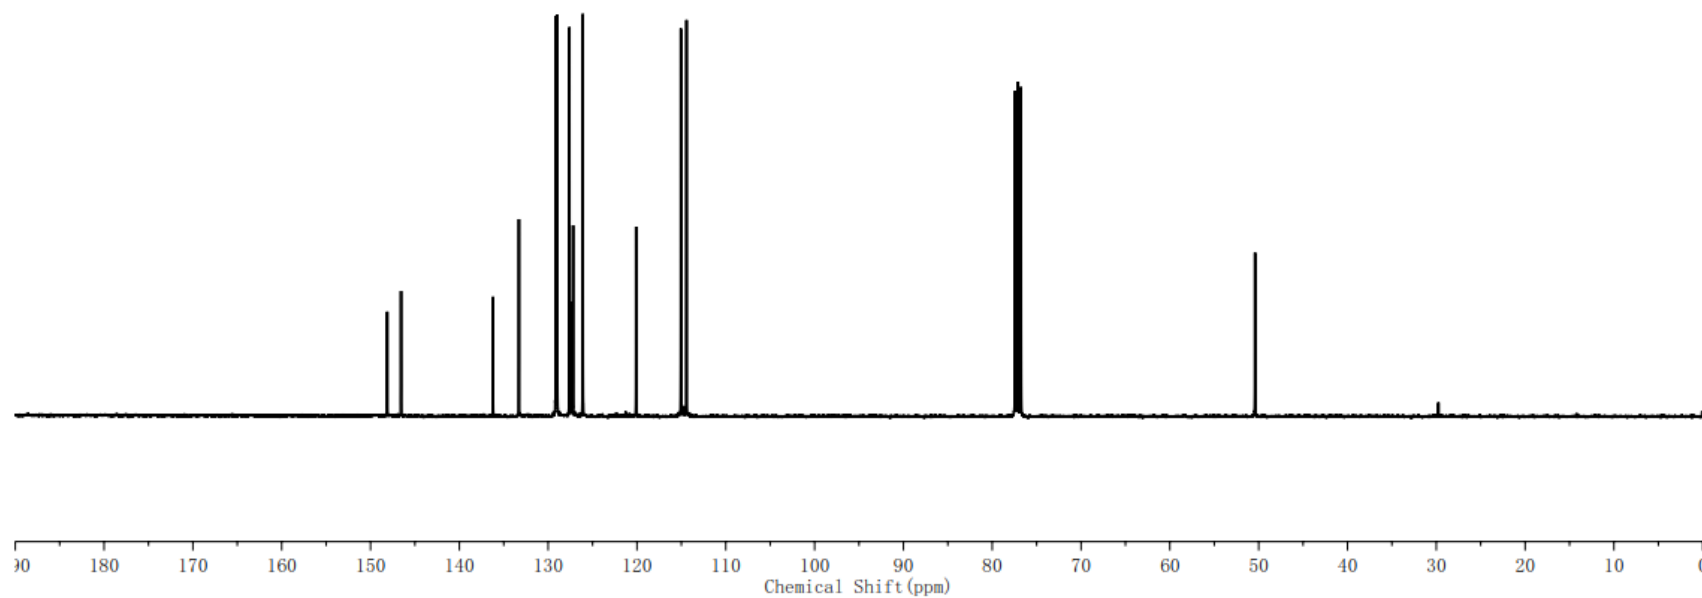

2022-06-06 YY0044-616-ZQL-02-6.2

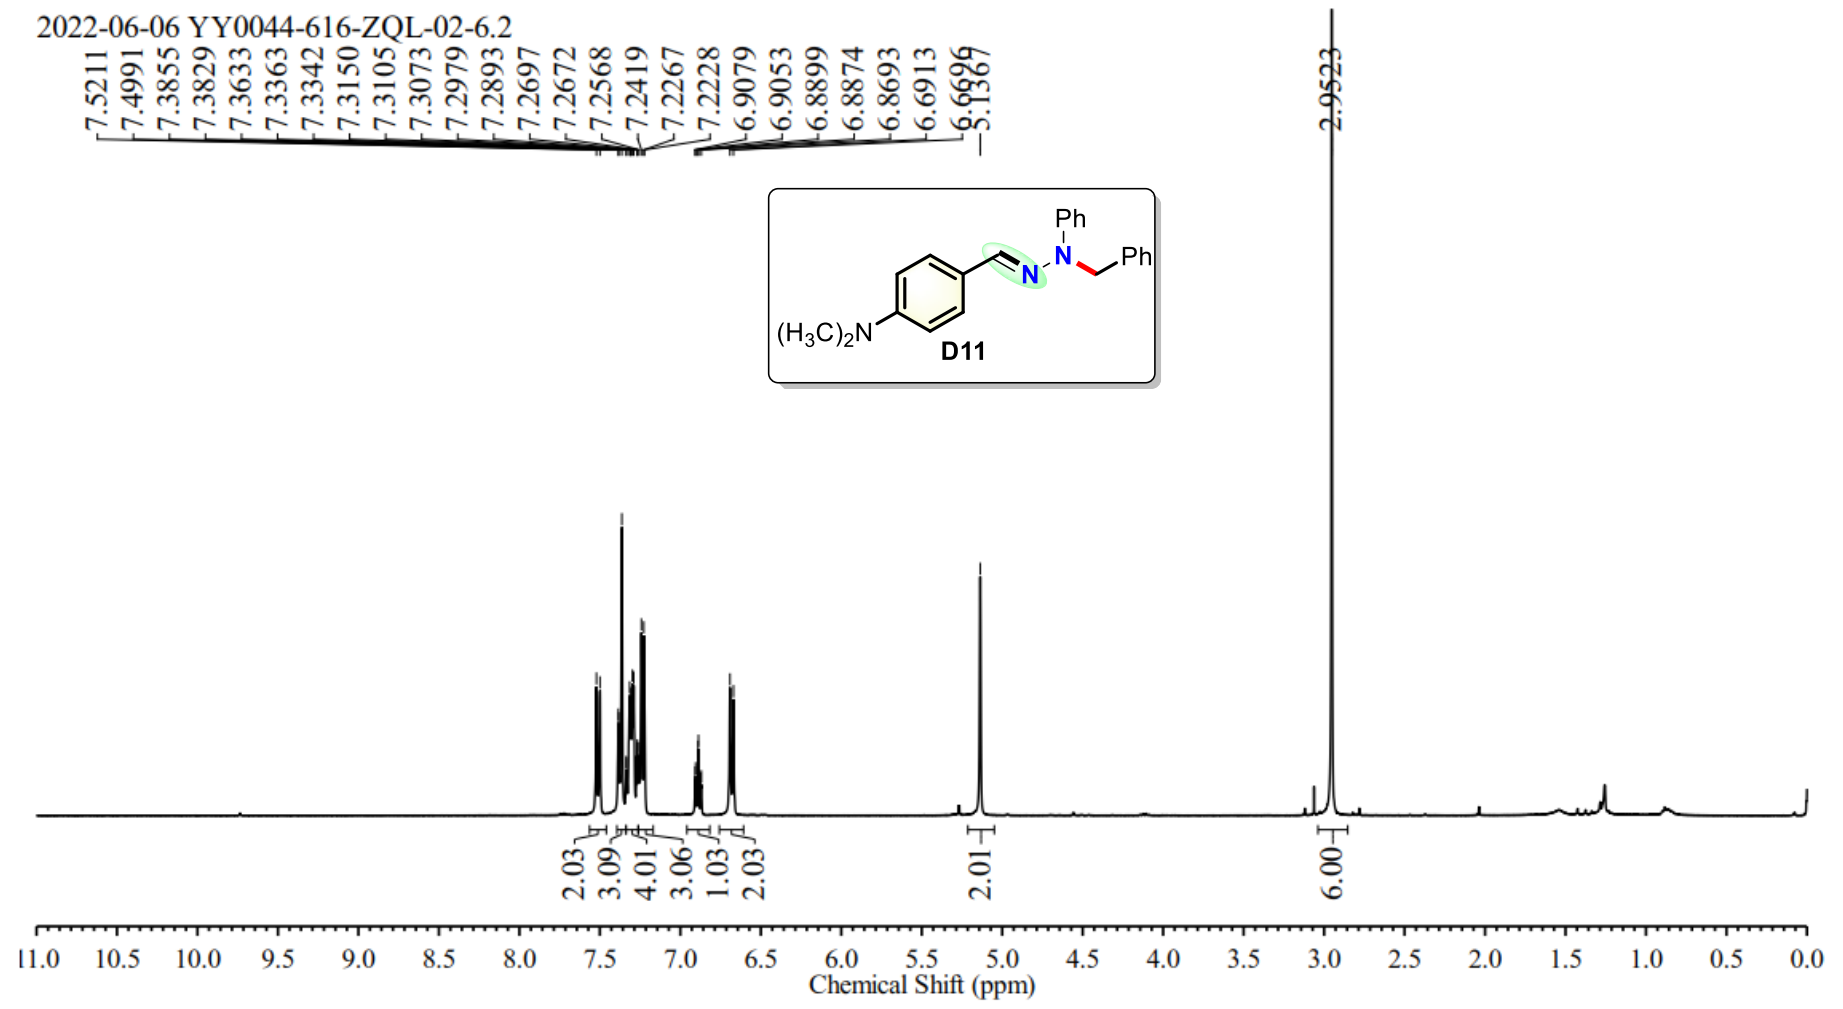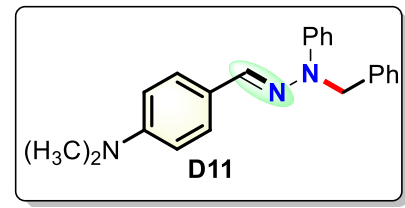



2022-6-7 YY0016-616-ZQL-2

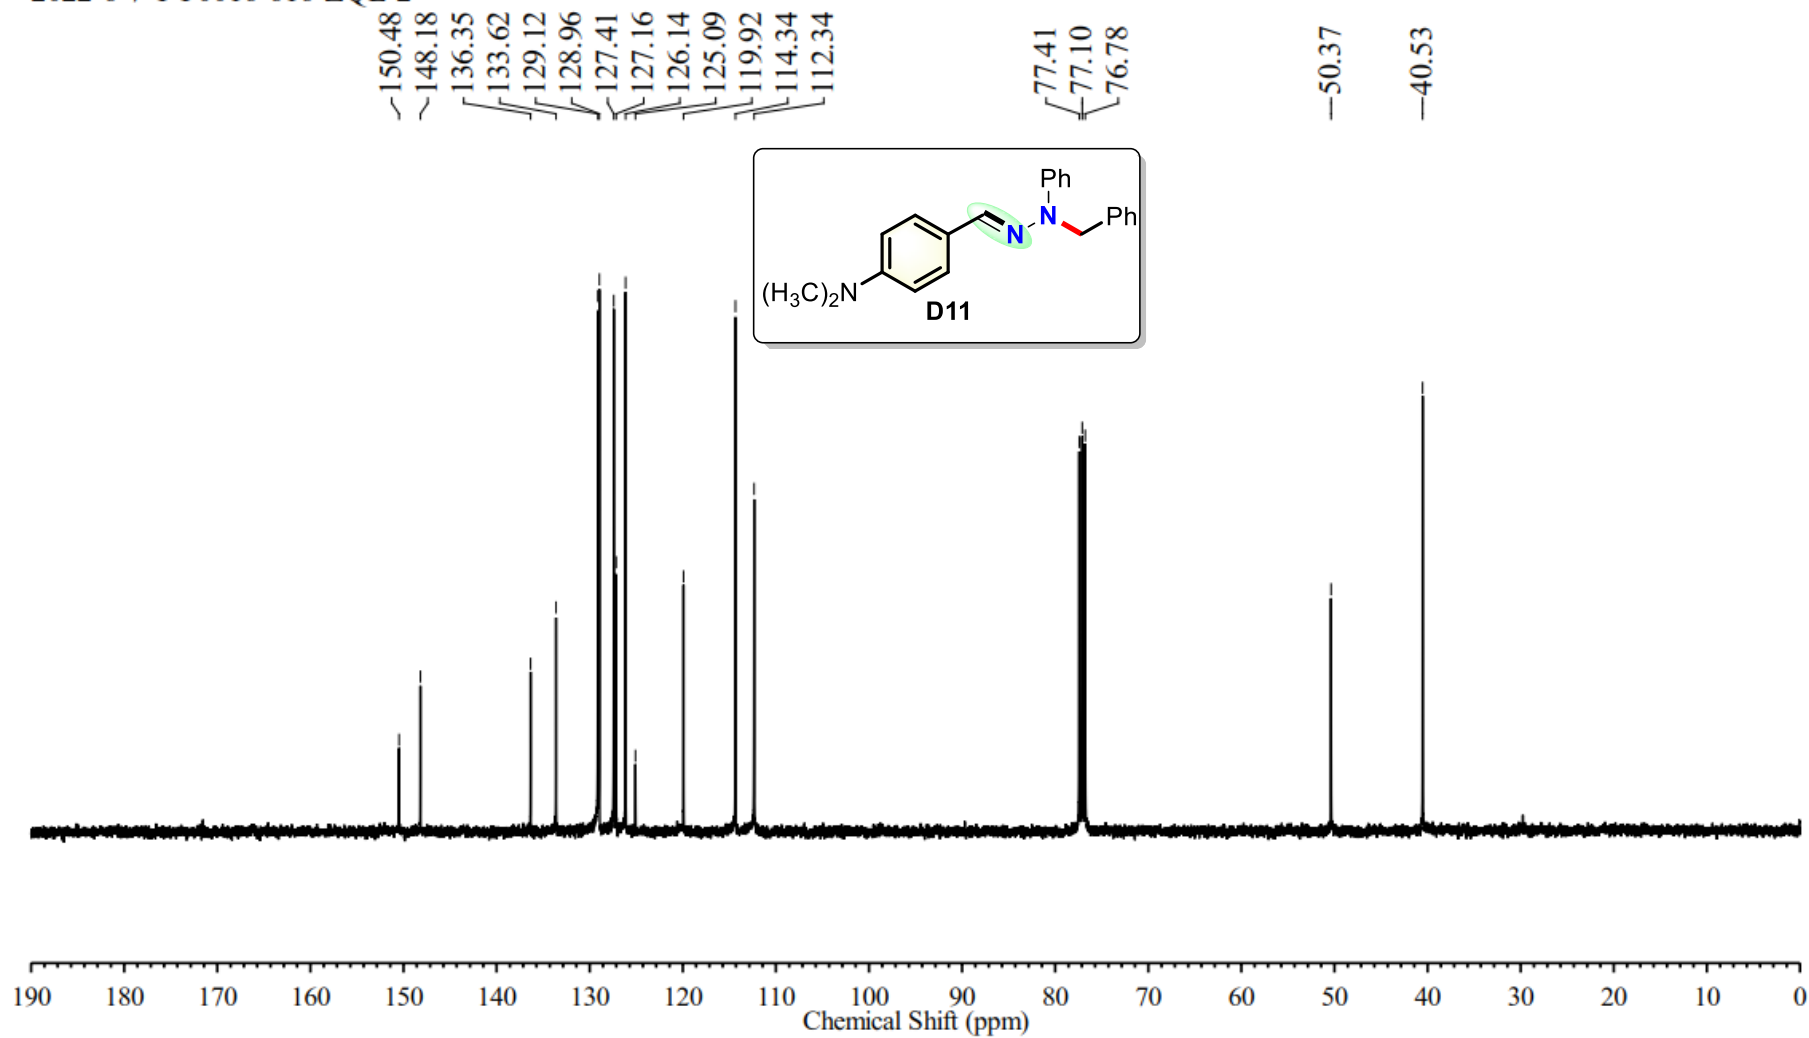

2022-05-28-yy0007-616-zq1-6

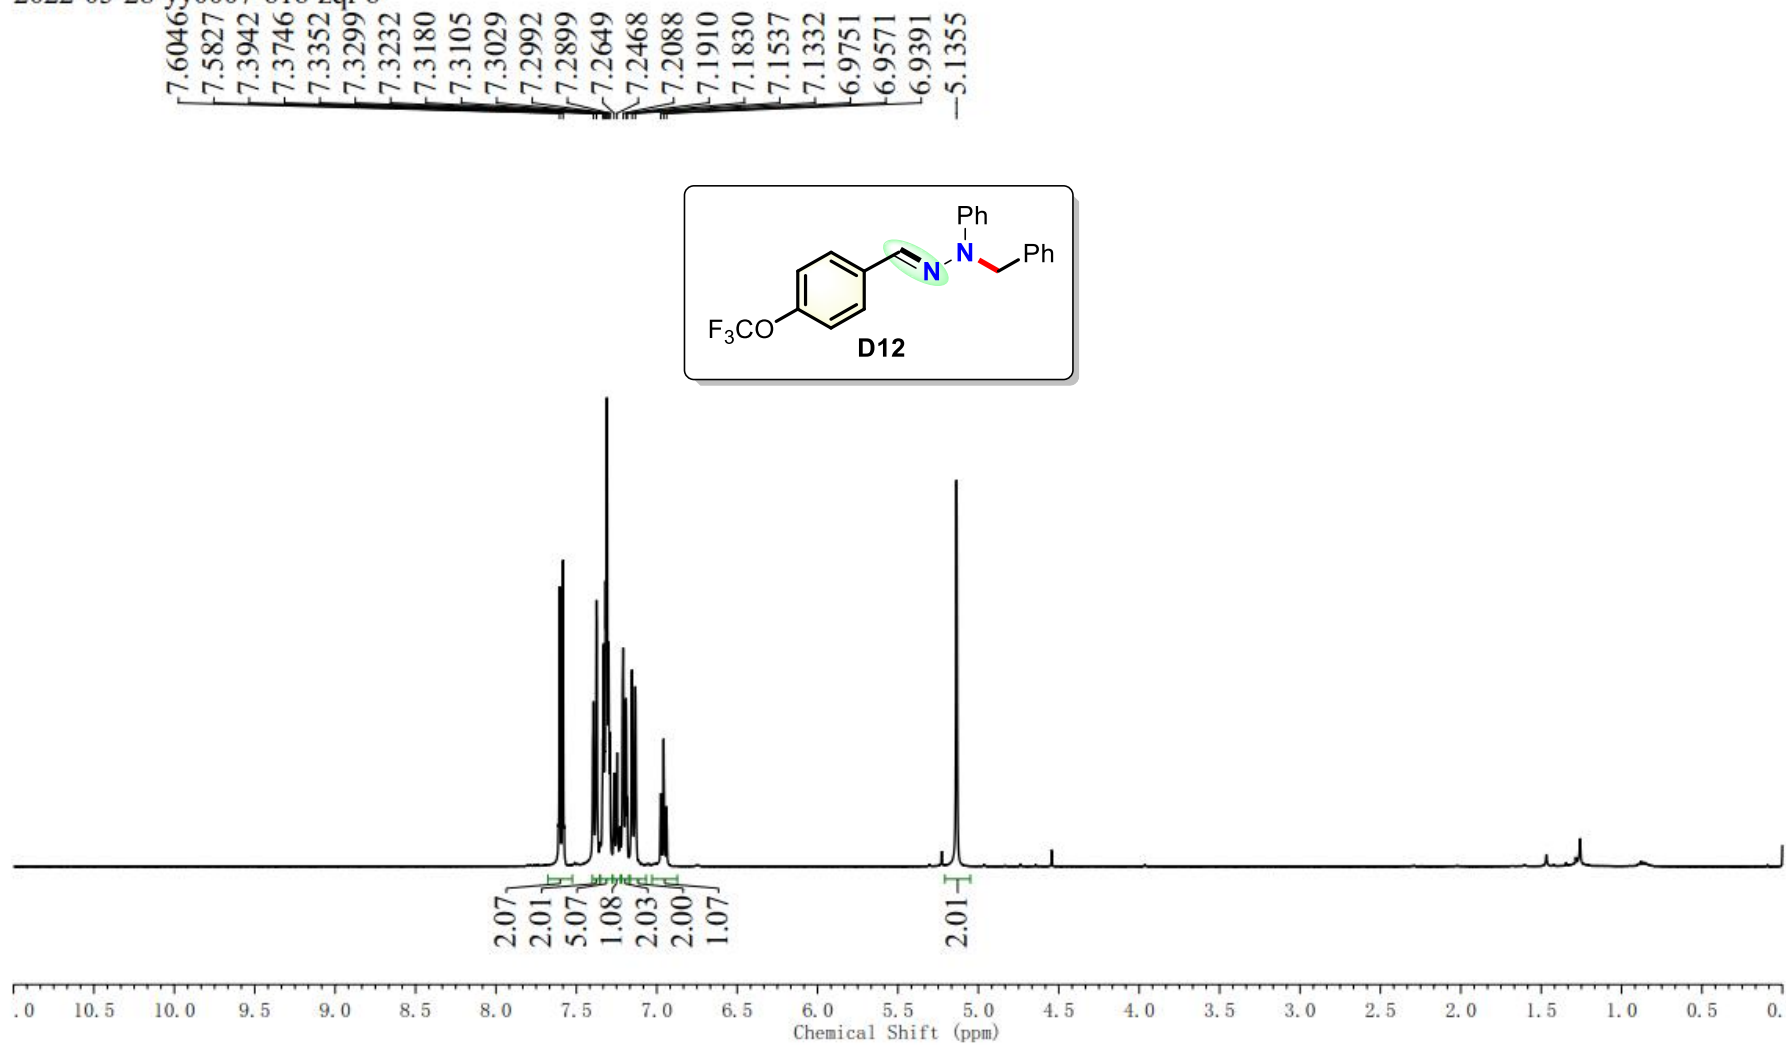

2022-05-30 YY0021 616-ZQL-0527-6

148.67  
148.66  
147.77  
135.42  
130.79  
129.29  
129.15  
127.48  
127.35  
126.05  
121.18  
121.15  
115.03  
77.43  
77.11  
76.79  
50.61

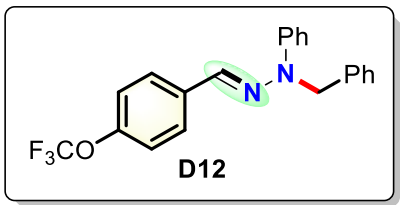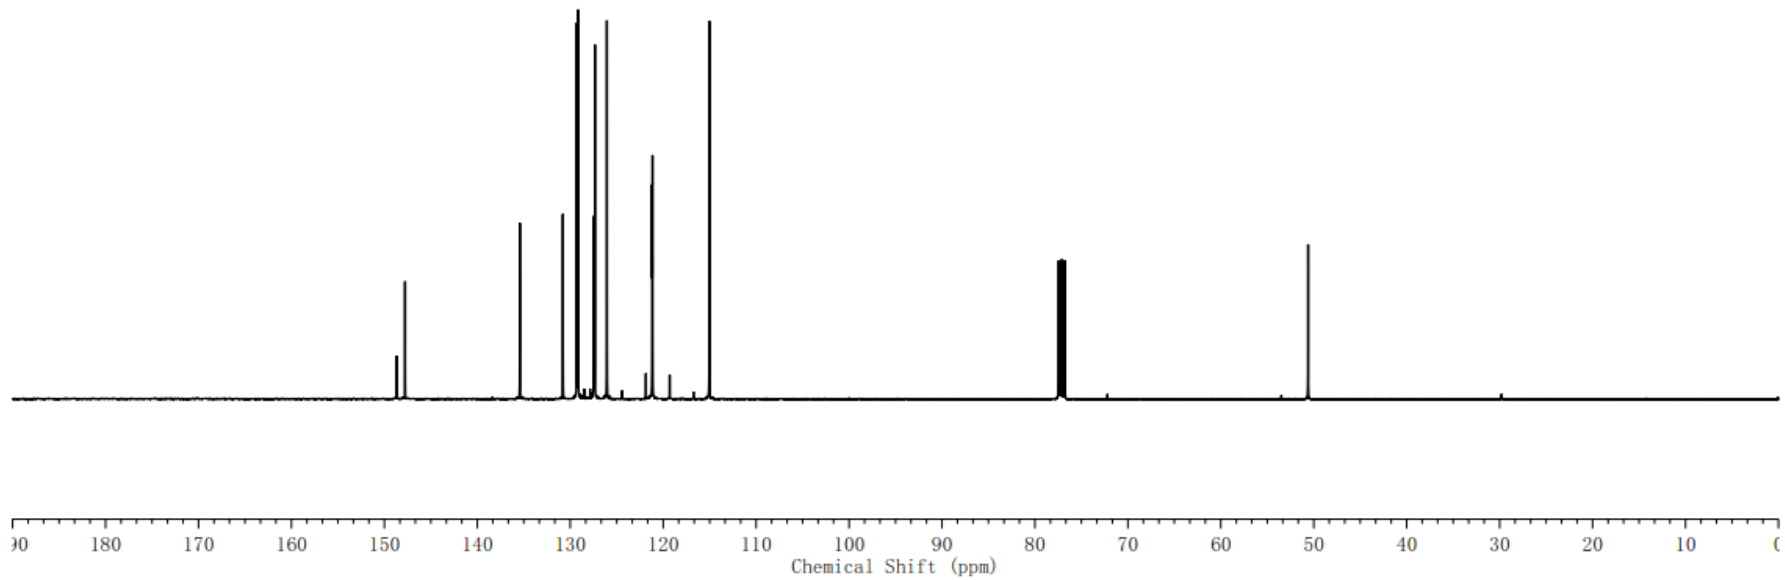

2022-05-16-YY0012-616-ZQL-5

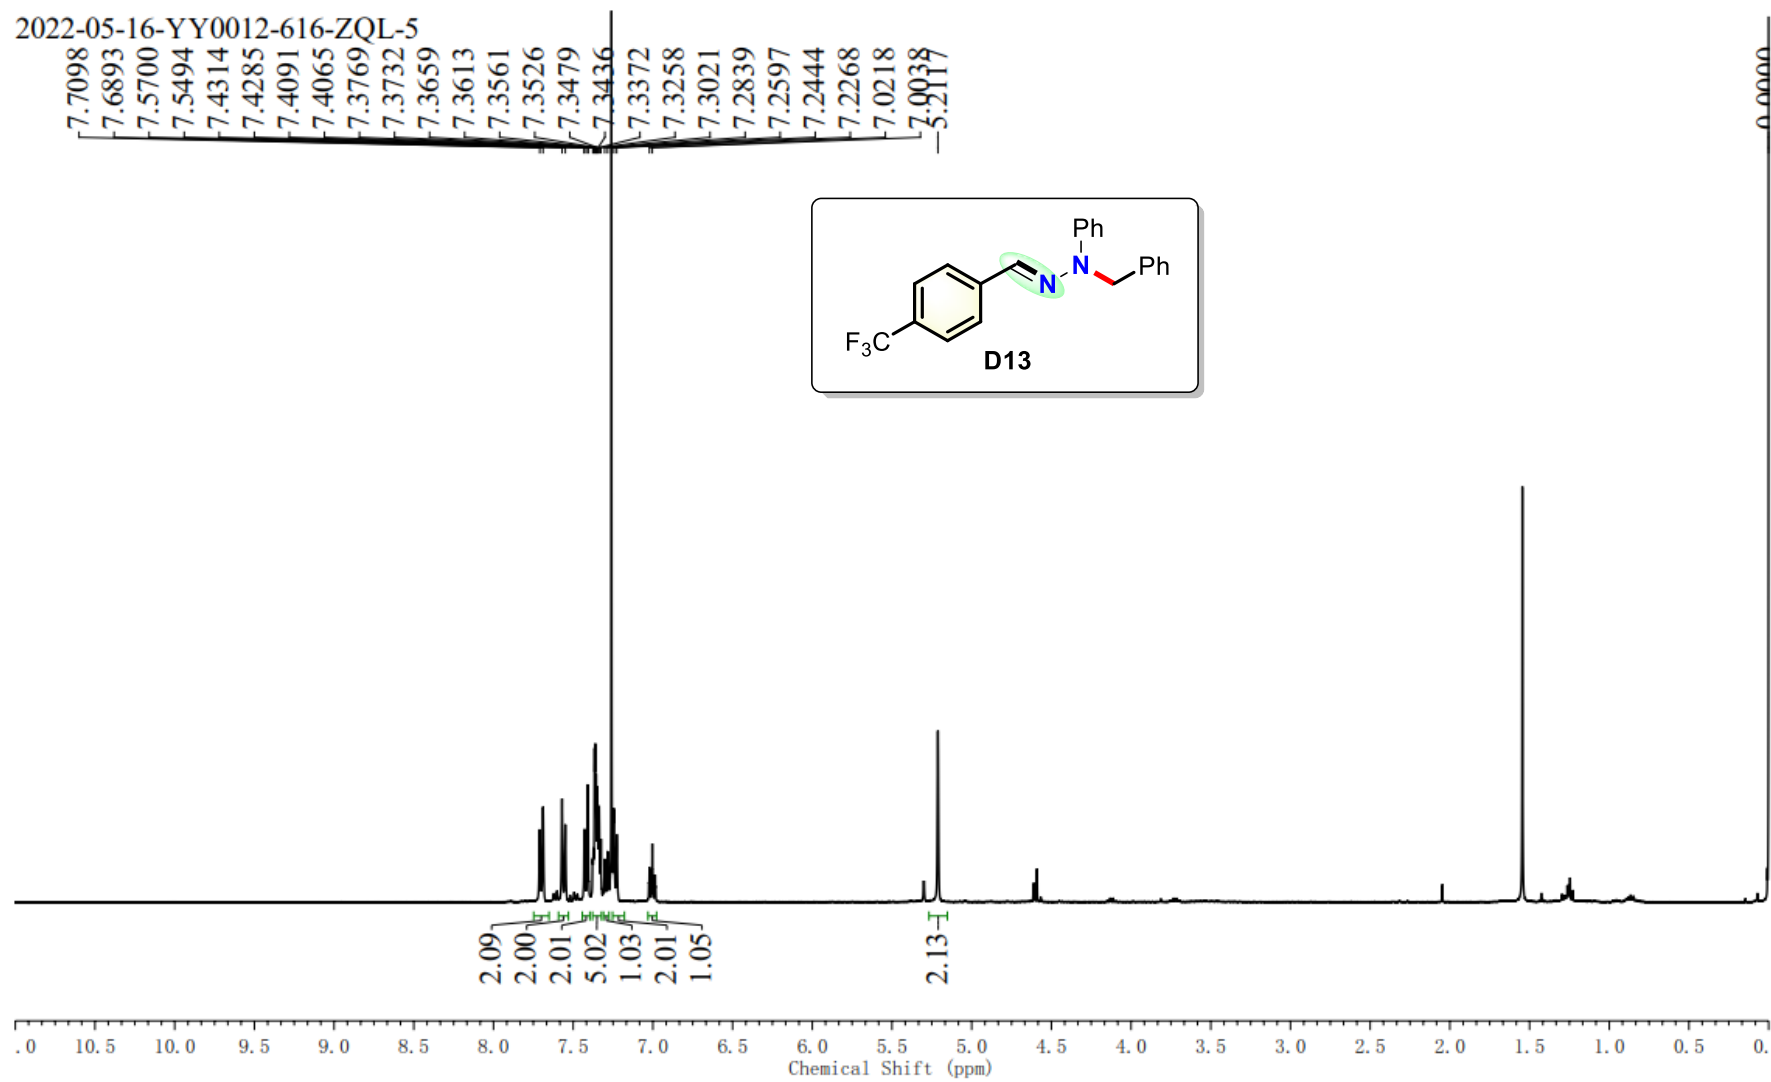

2022-05-17-yy0024-616-zql-5

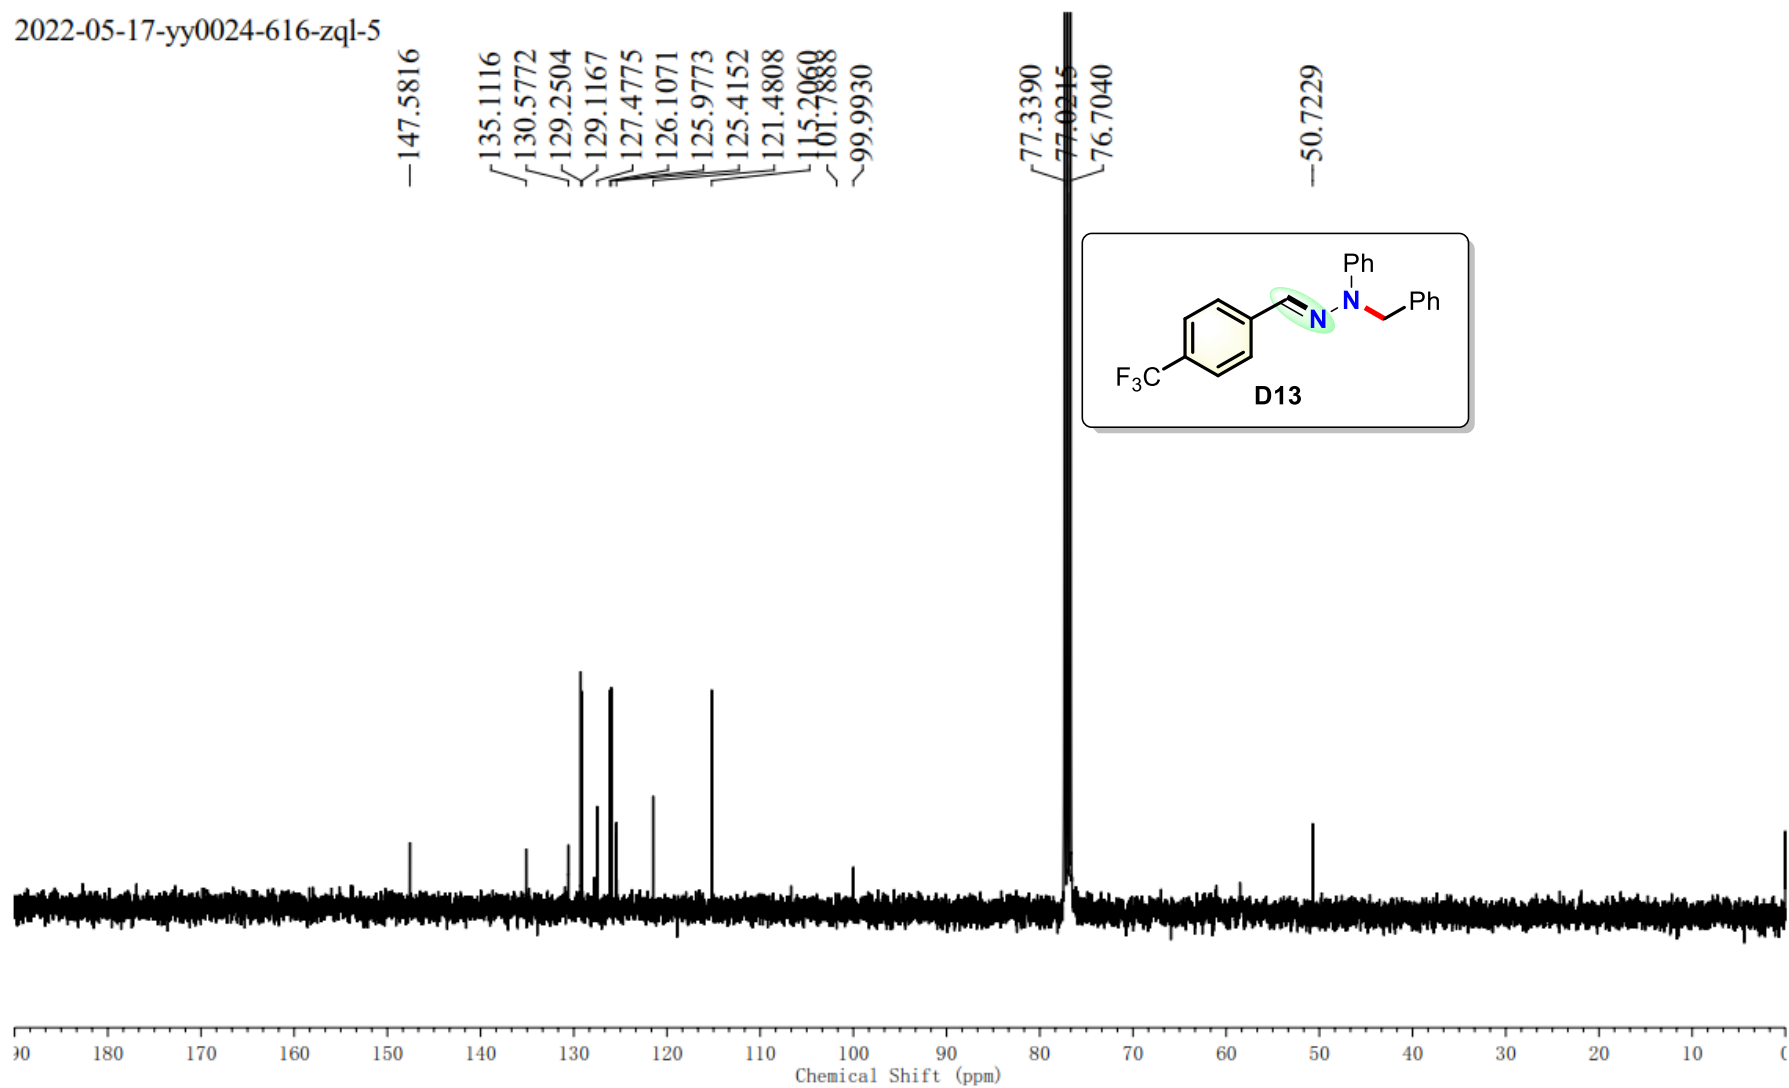

2022-05-17-yy0024-616-zql-5

---62.4181

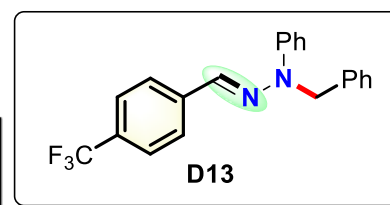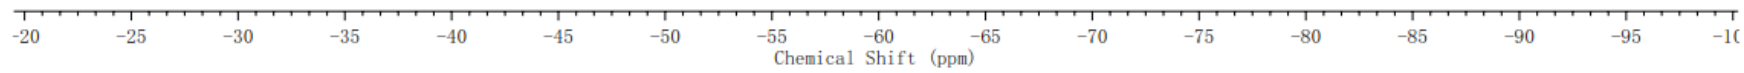

2022-06-20 yy0003-616-zql-1

7.6798  
7.6590  
7.5882  
7.5674  
7.4227  
7.4024  
7.3673  
7.3547  
7.3498  
7.3364  
7.3279  
7.3080  
7.2863  
7.2532  
7.2309  
7.2125  
7.0408  
7.0229  
7.0050

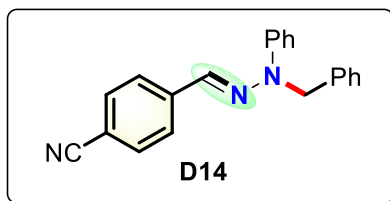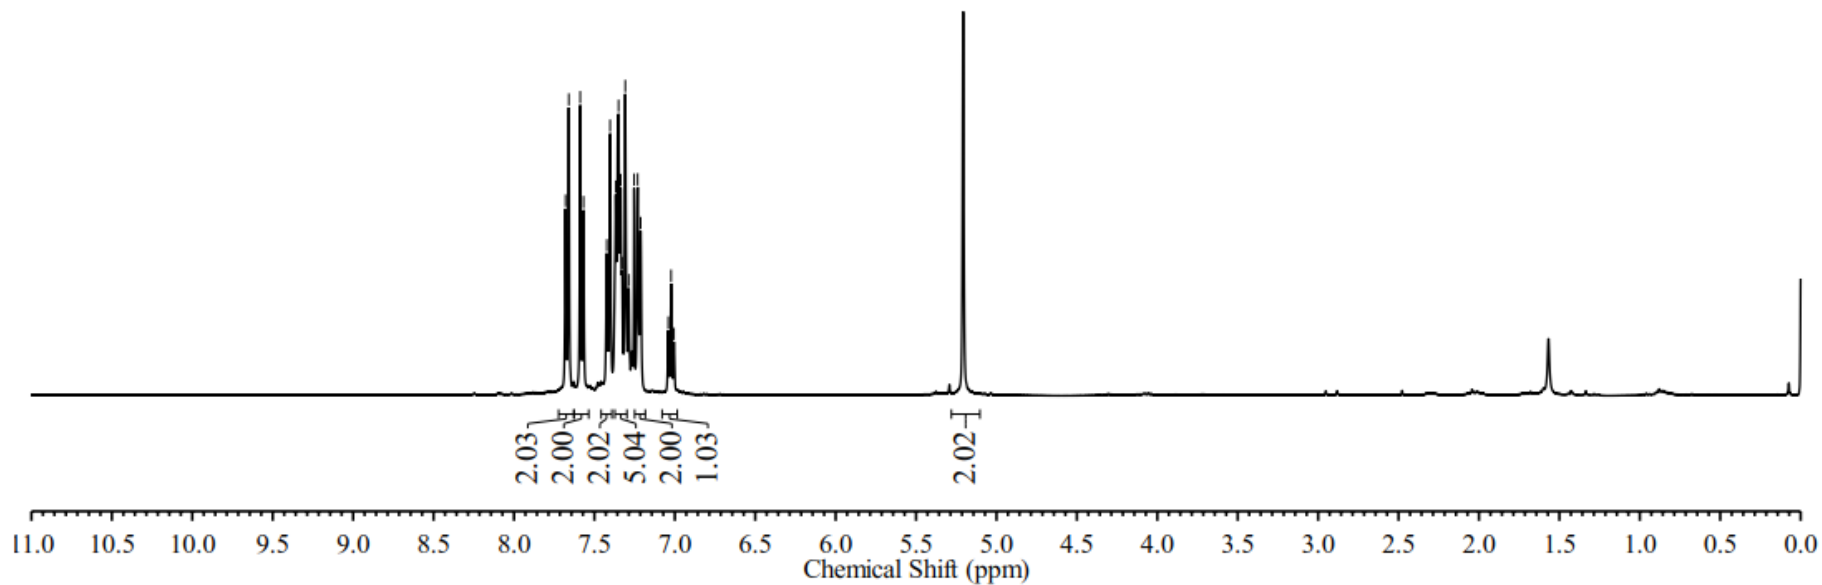

2022-06-21 yy0027 616-zql-1

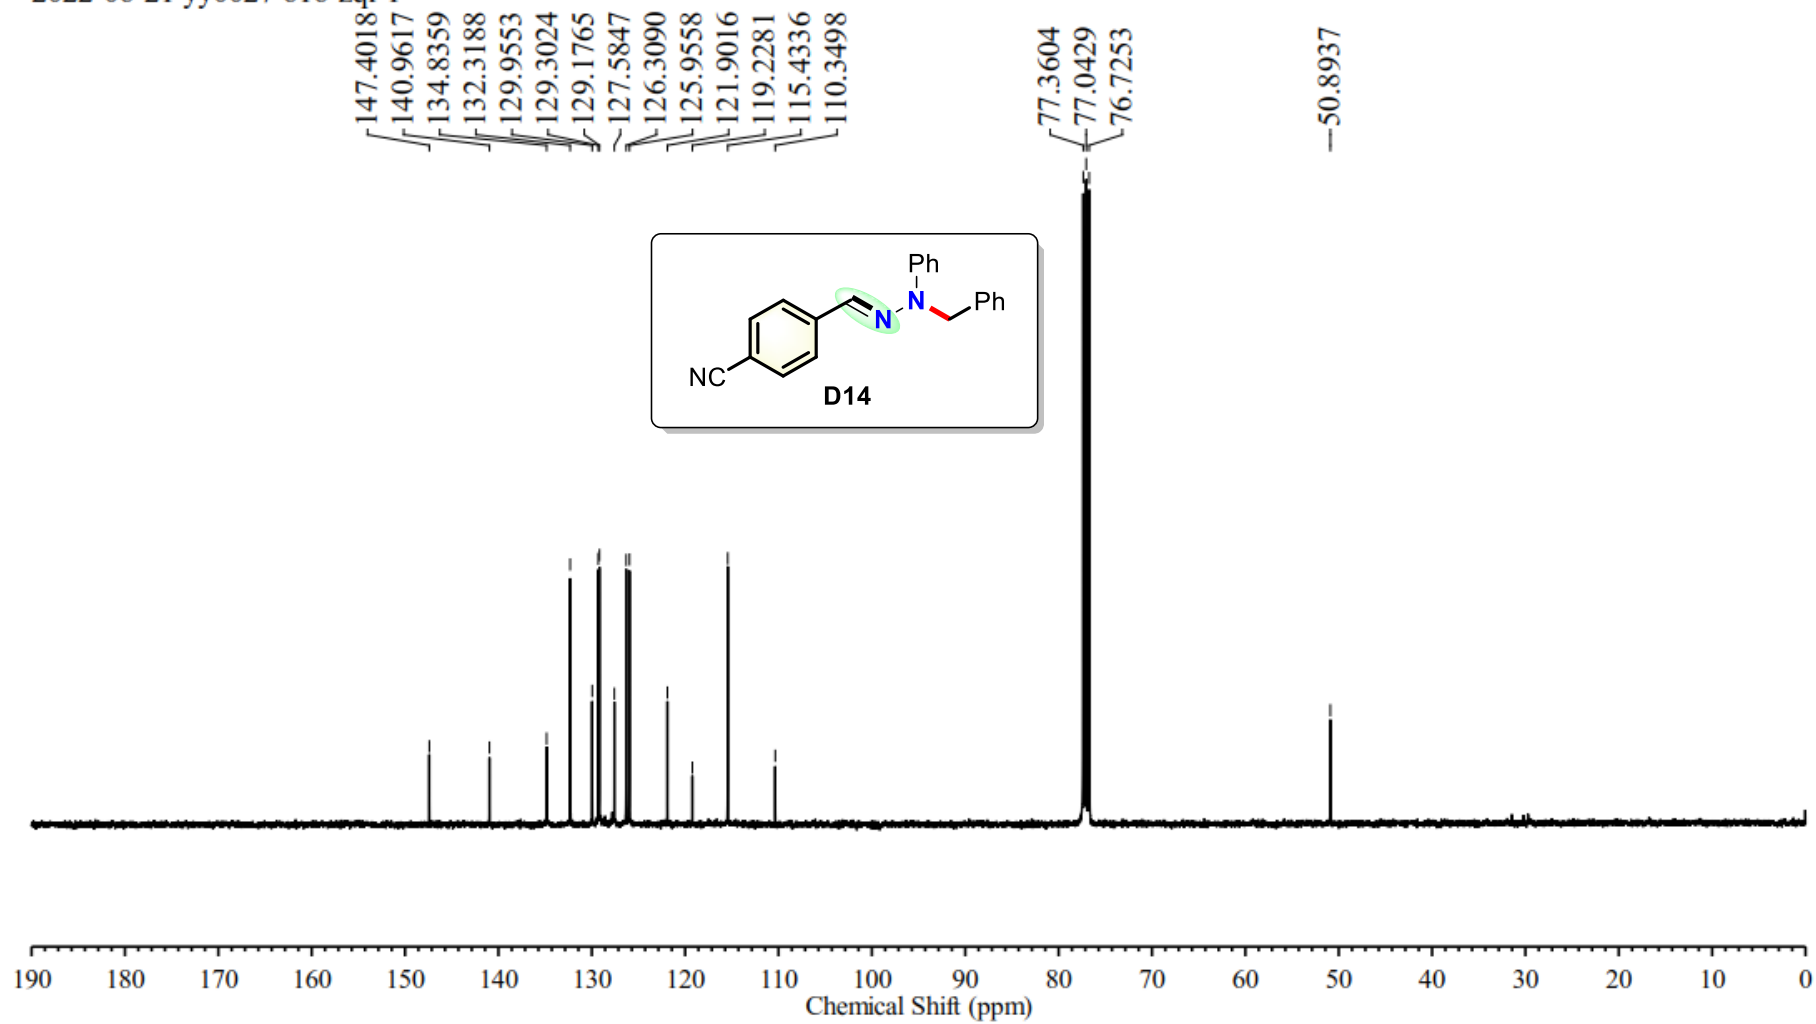



2022-11-7-yy0025-616-e26

7.5073  
7.4858  
7.3856  
7.3658  
7.3342  
7.3201  
7.3022  
7.2662  
7.2483  
7.2293  
7.2118  
6.9400  
6.9221  
6.9041  
6.7790  
6.7575  
— 5.1350  
— 4.9171

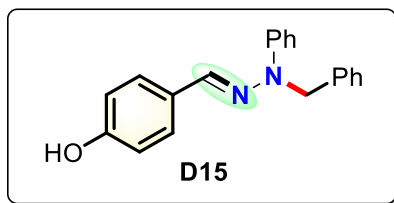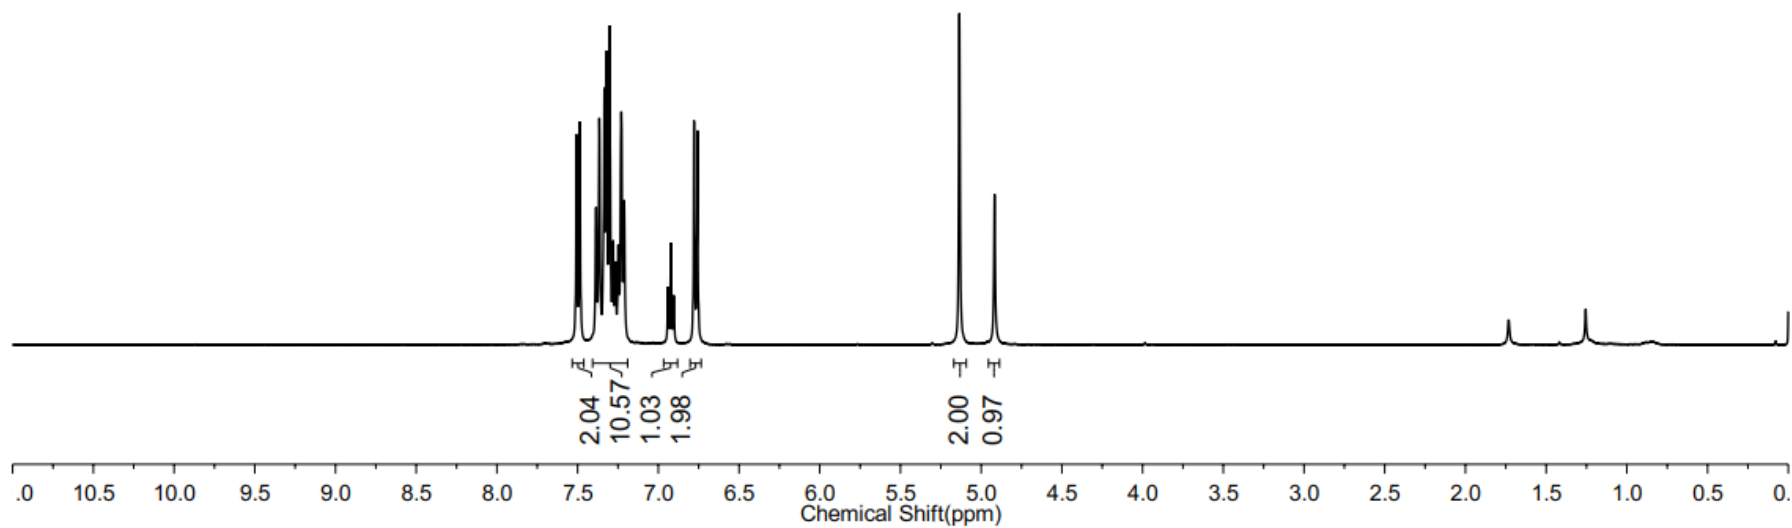

2022-11-10-yy0031-616-E26

155.53  
148.00  
135.95  
132.46  
129.66  
129.19  
129.03  
127.74  
127.29  
126.08  
120.47  
115.54  
114.64  
77.40  
77.09  
76.77  
50.50

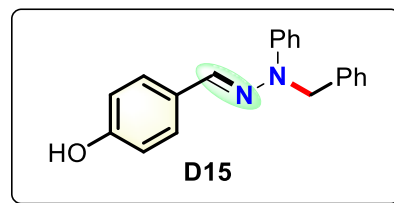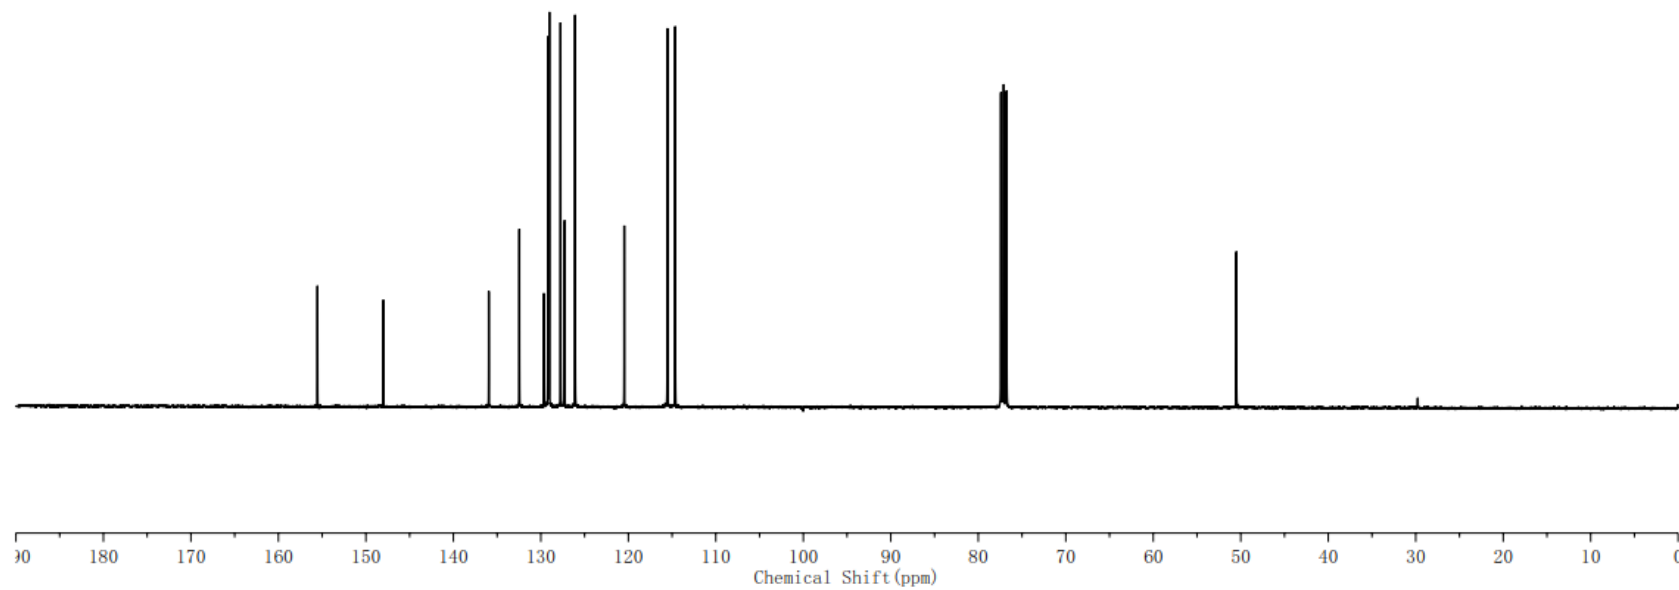

2022-06-06 YY0044-616-ZQL-04-6.2

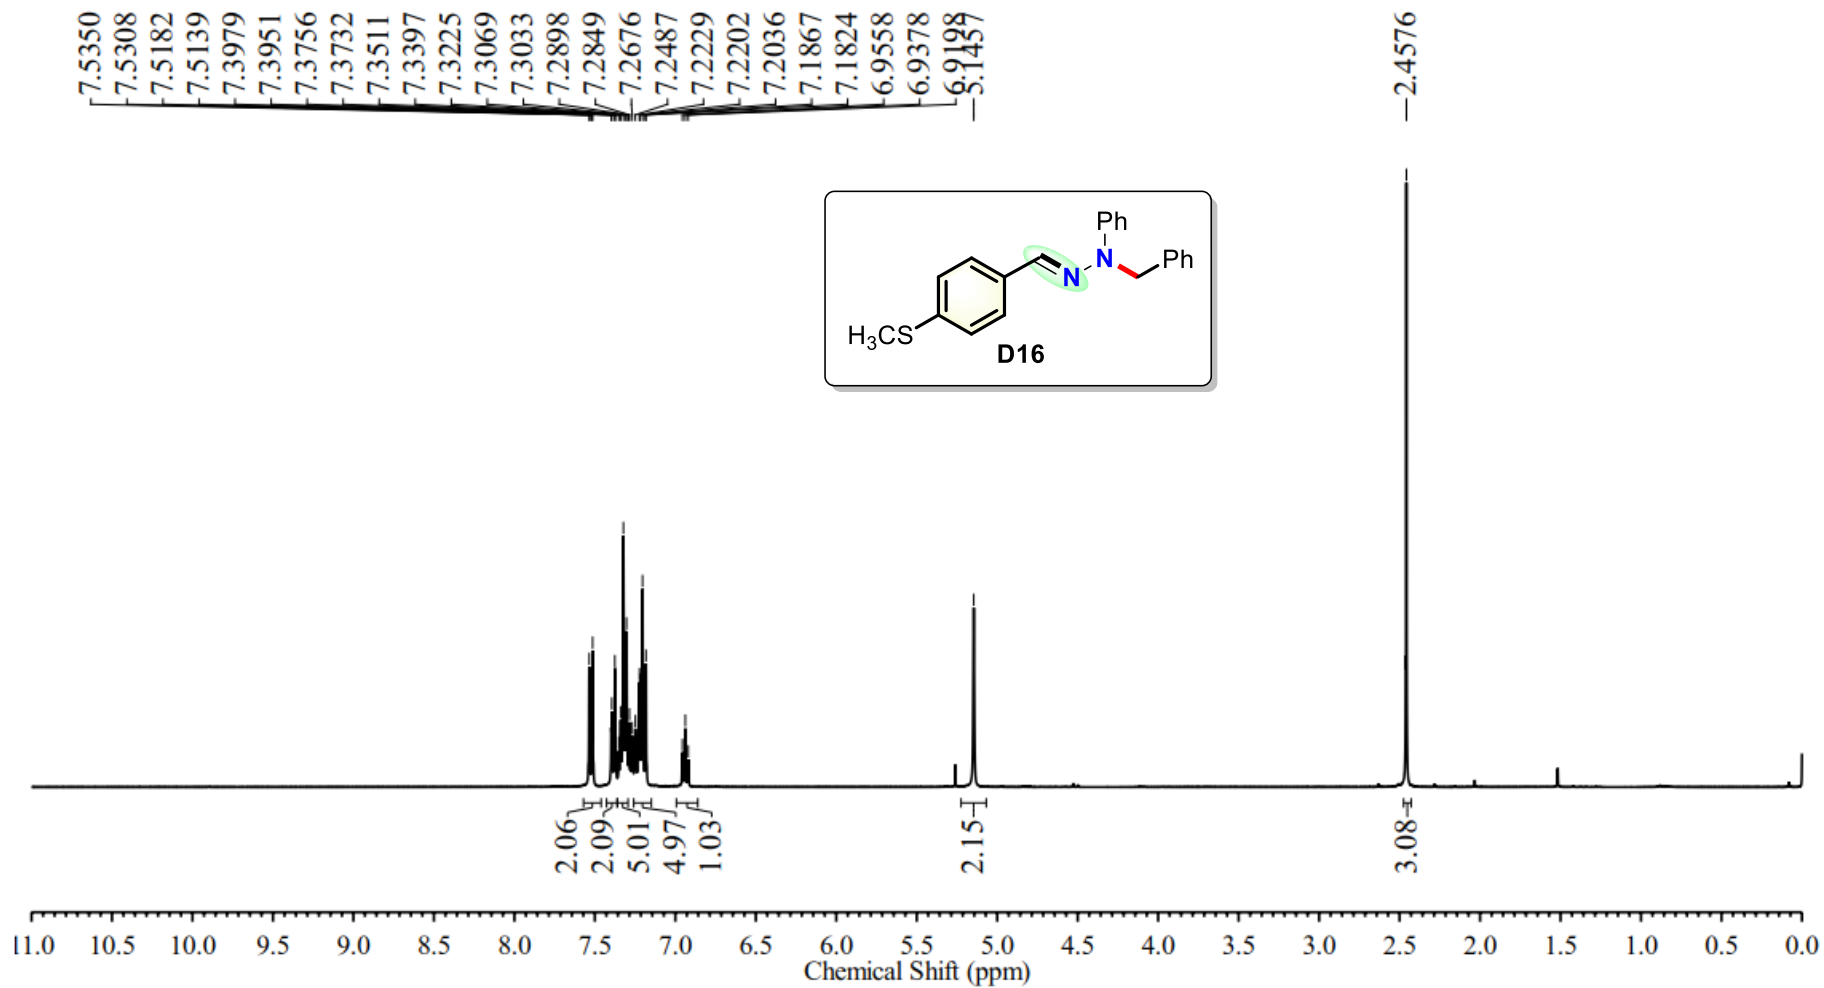

2022-6-7 YY0016-616-ZQL-4

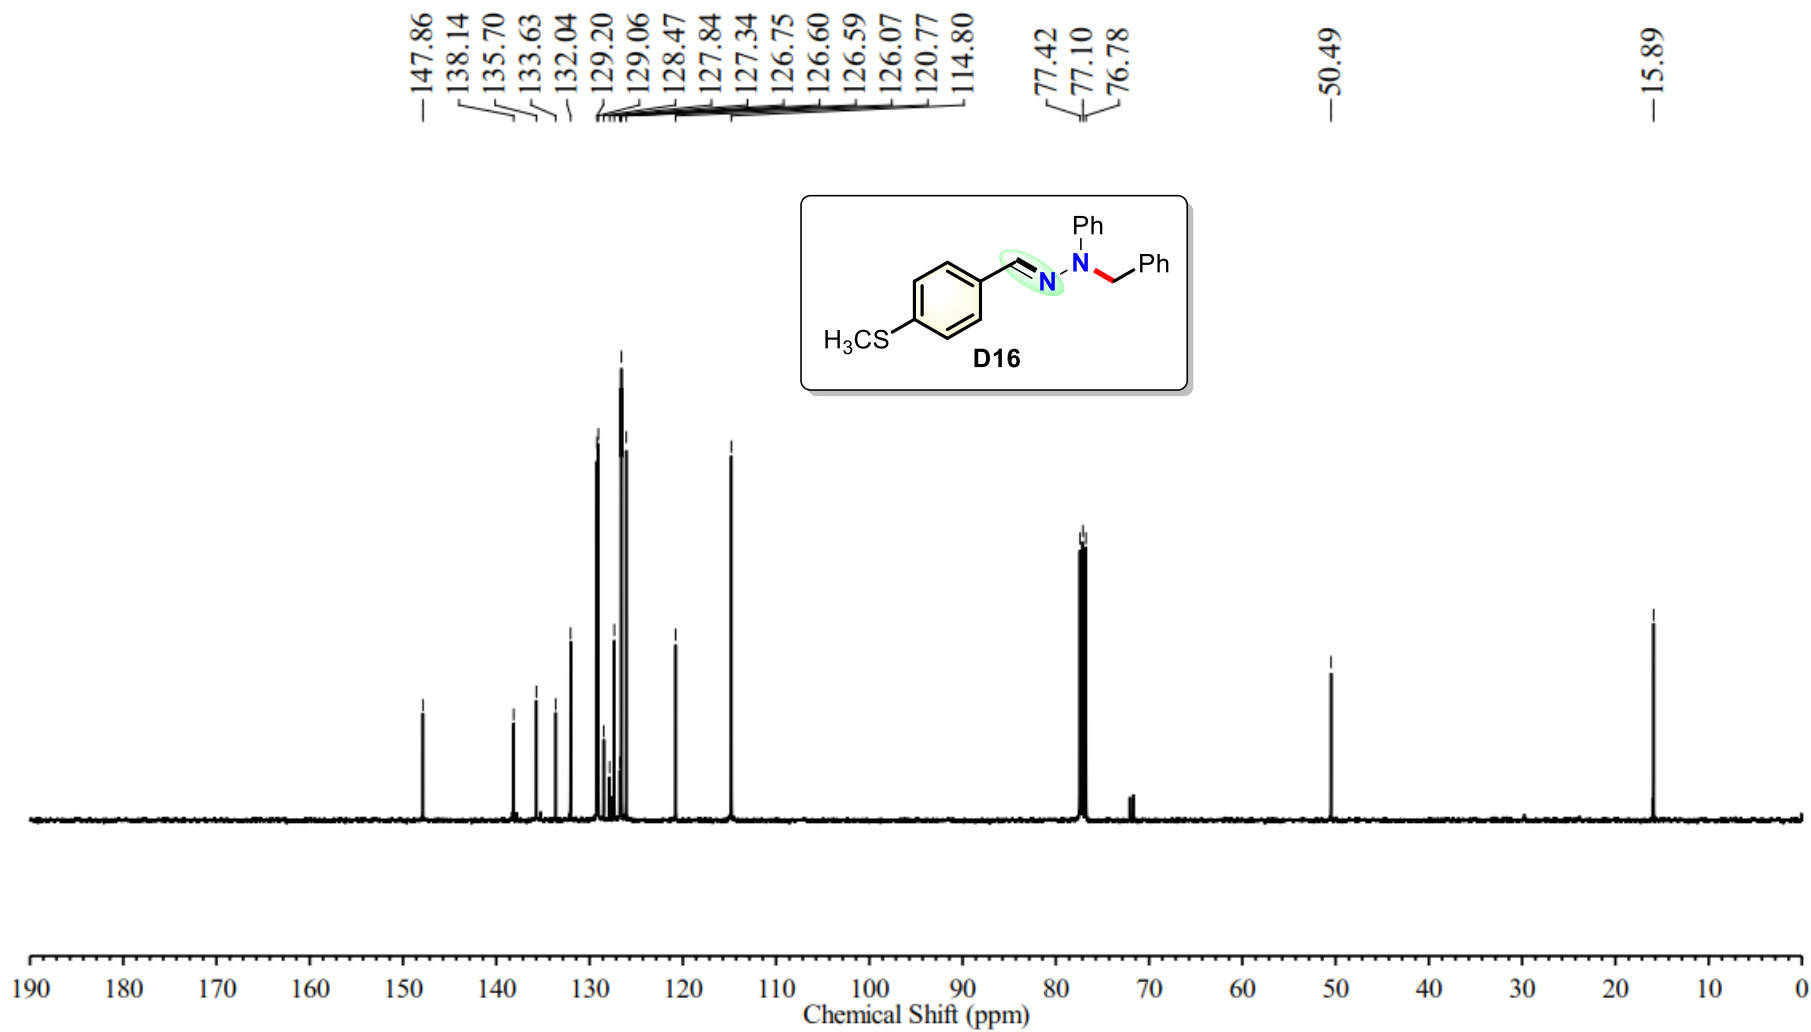

2022-5-5 yy0004-616-zql-26-3

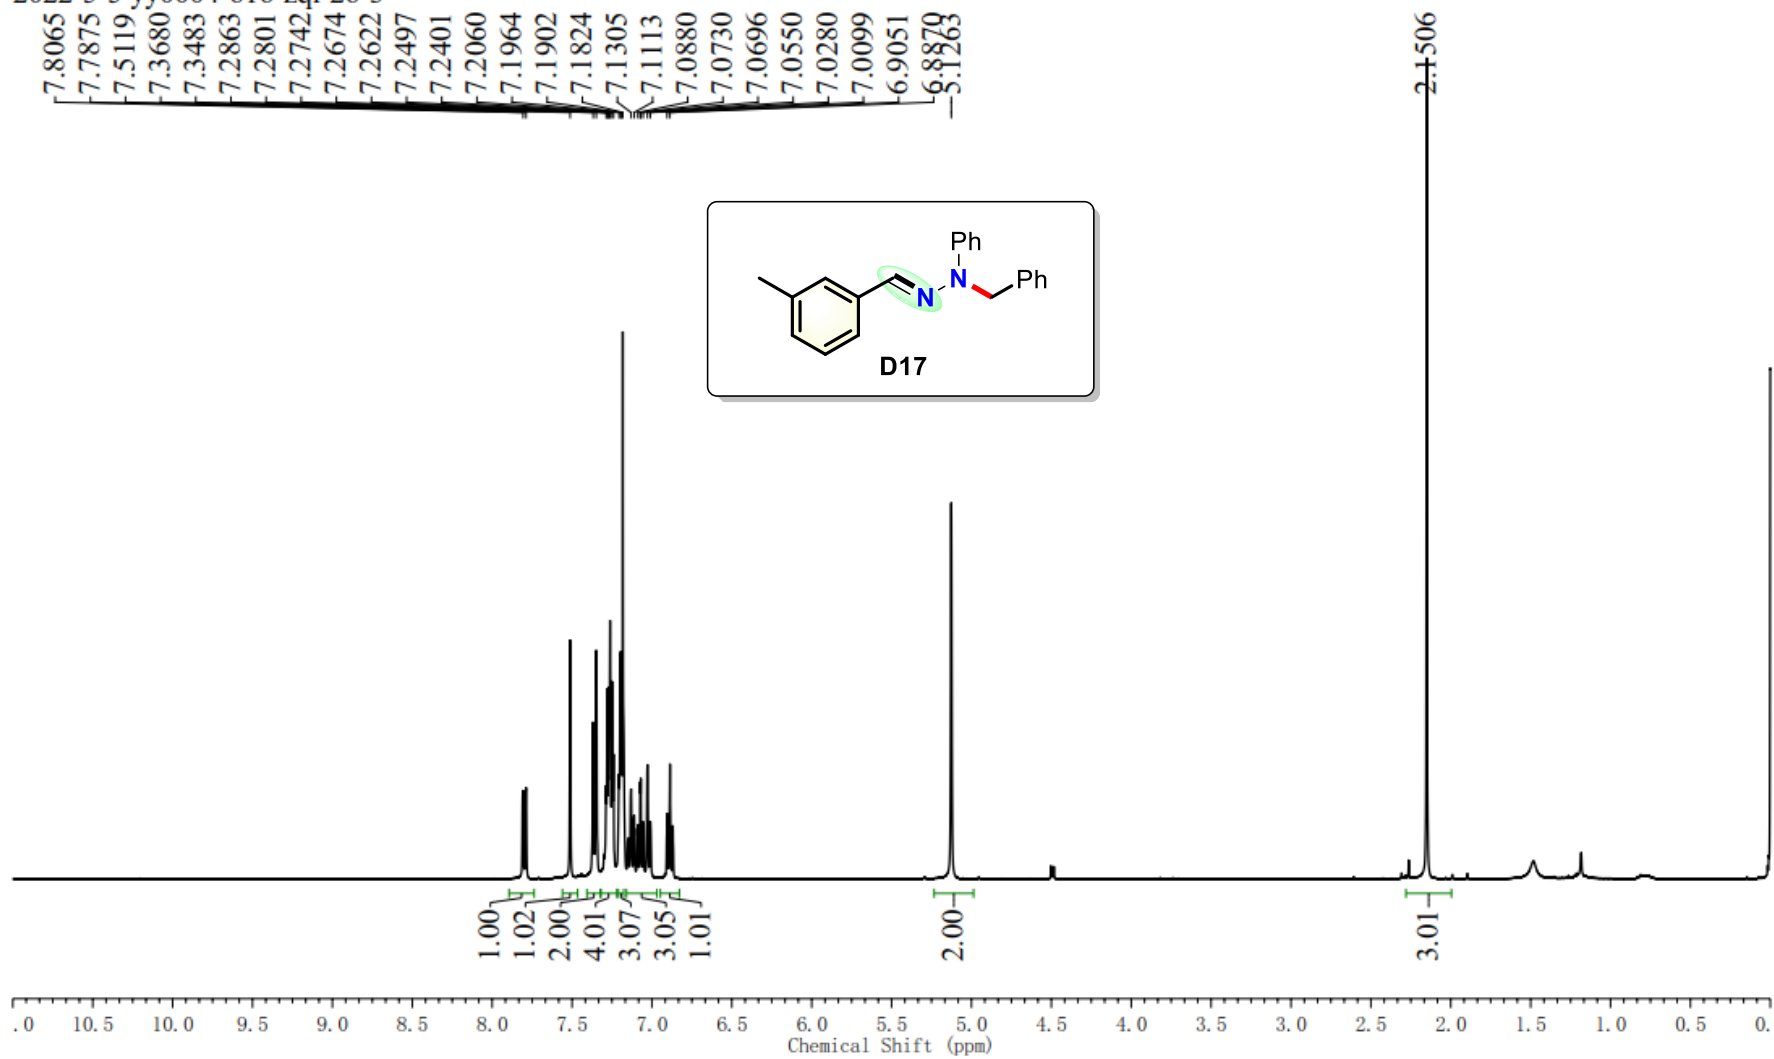

2022-5-6 yy0012-616-zql-26-3

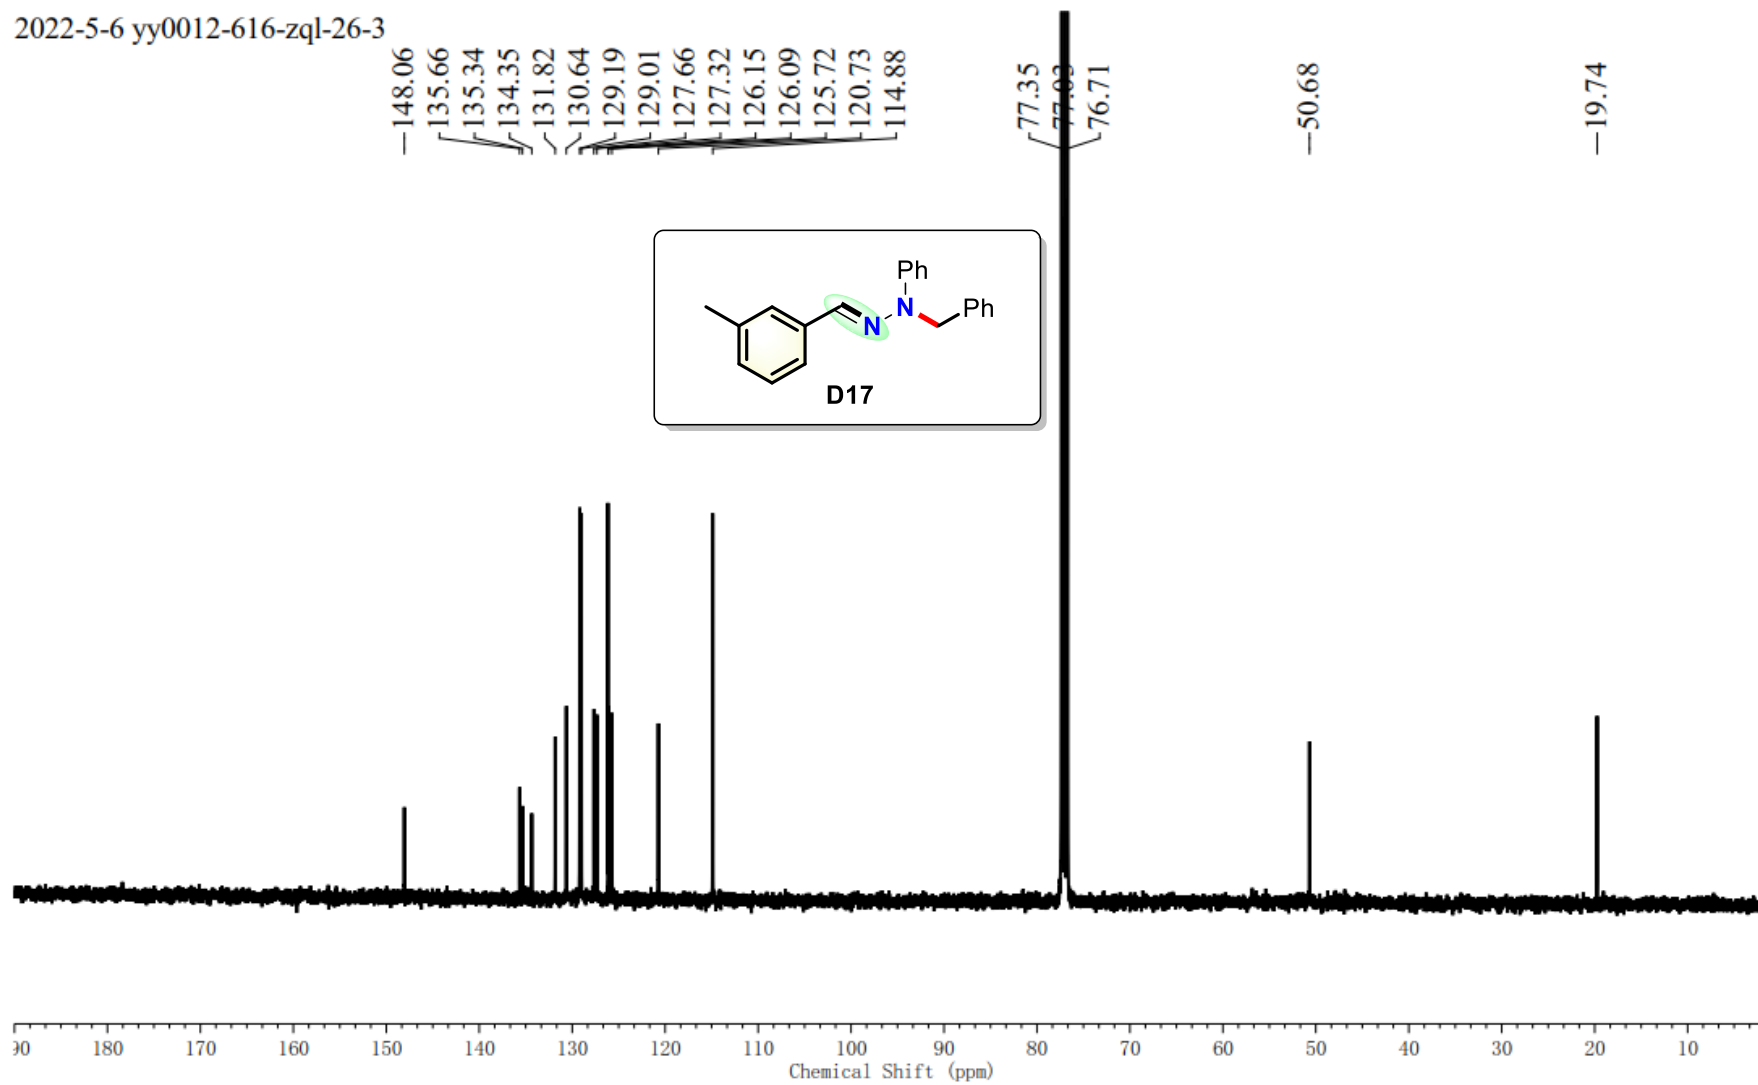

2022-5-5 yy0004-616-zql-26-5

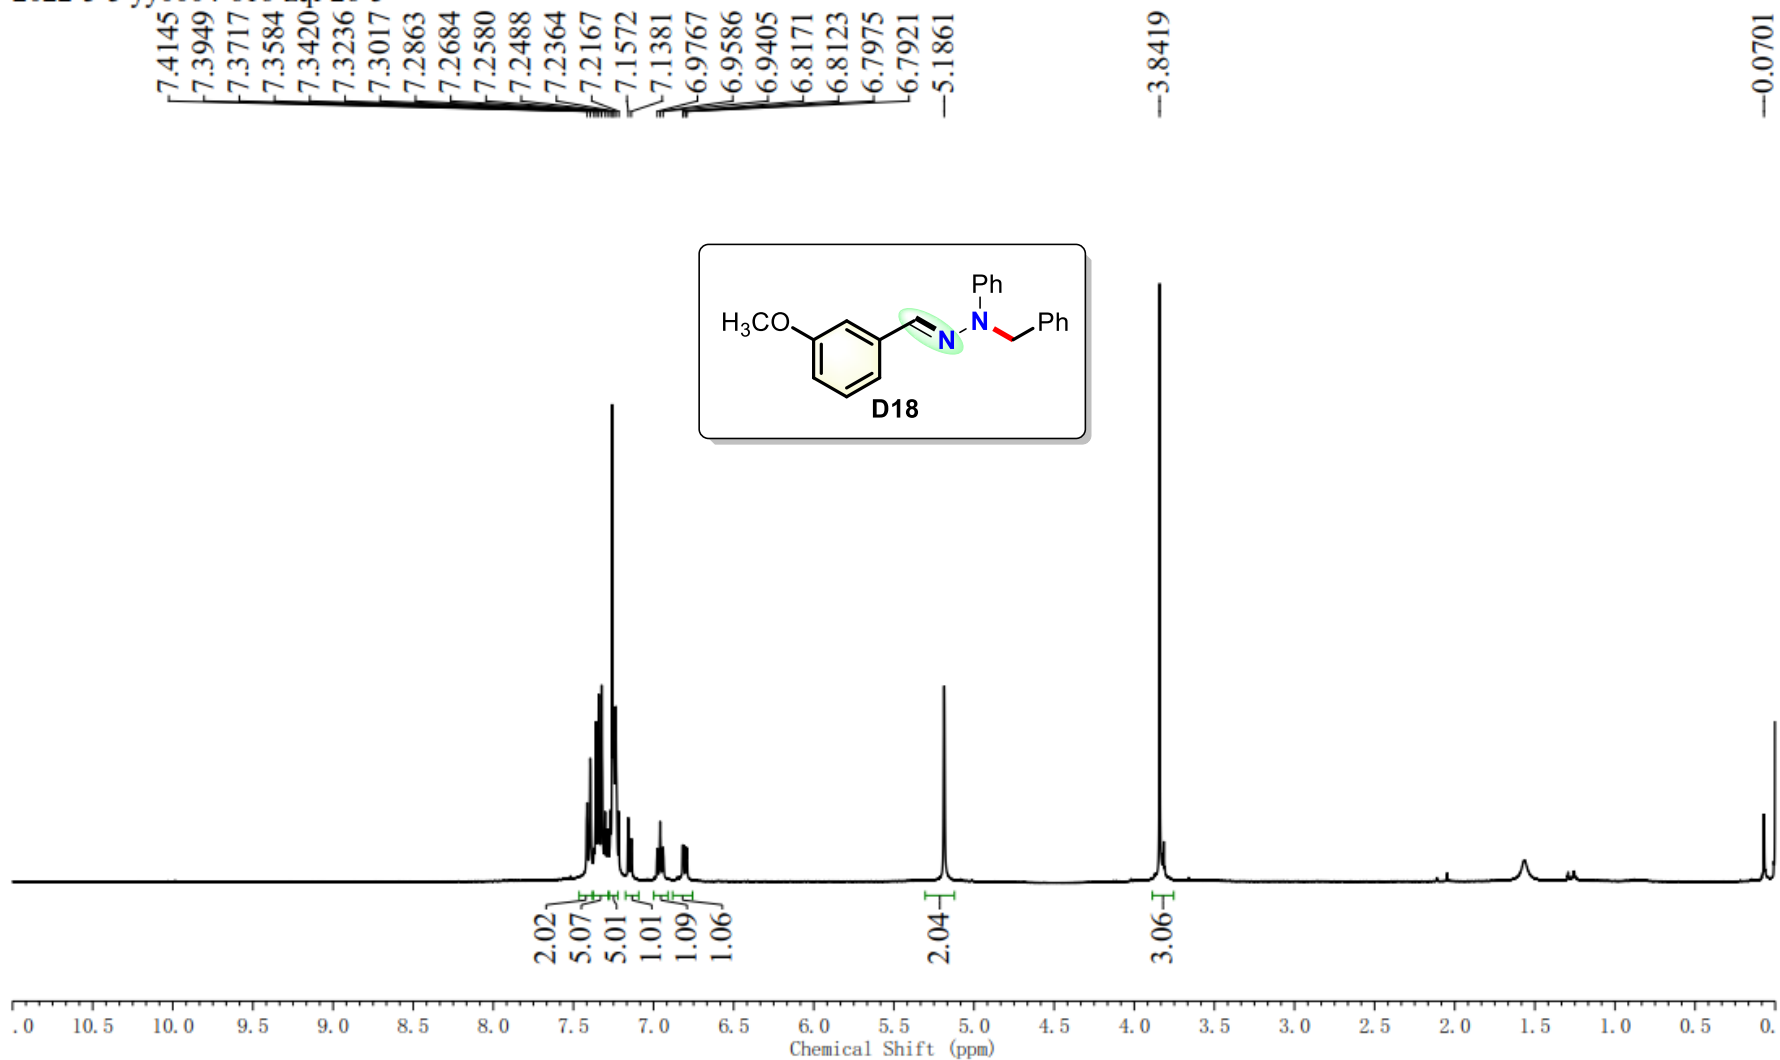

2022-5-6 yy0012-616-zql-26-5

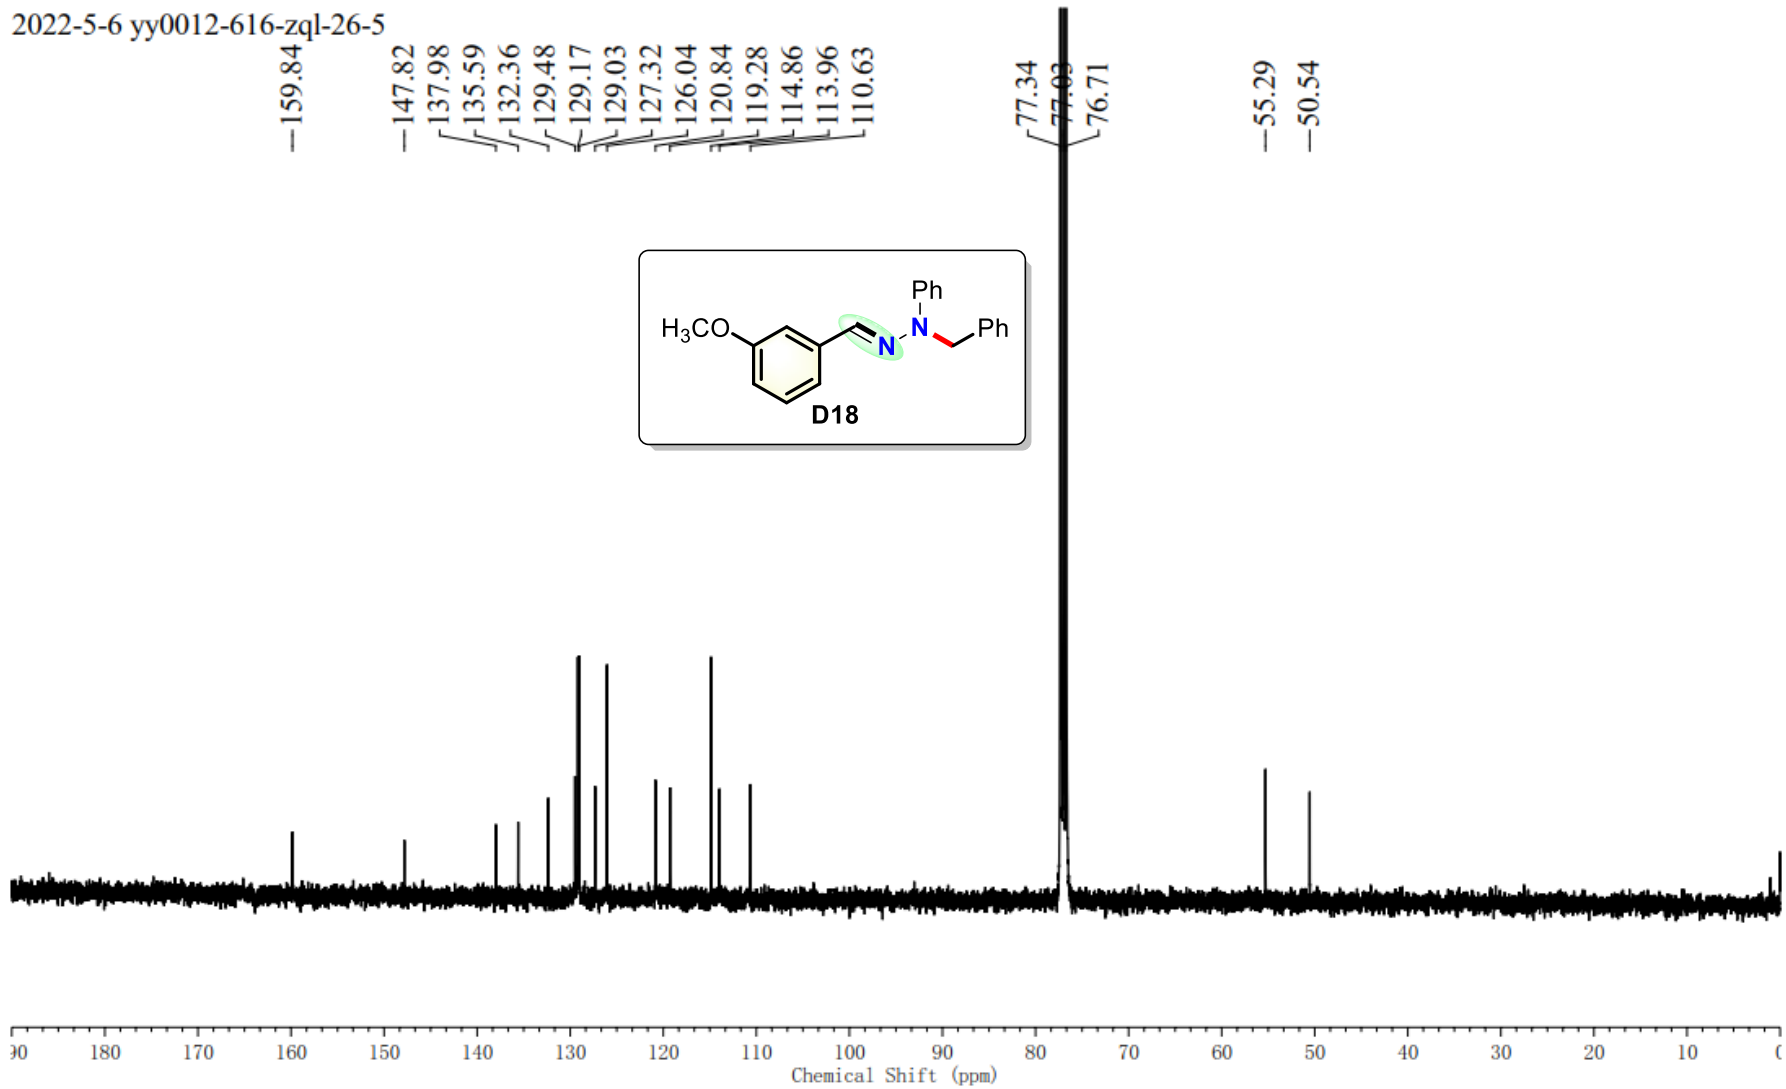



2022-5-7 yy0007-616-zql-3

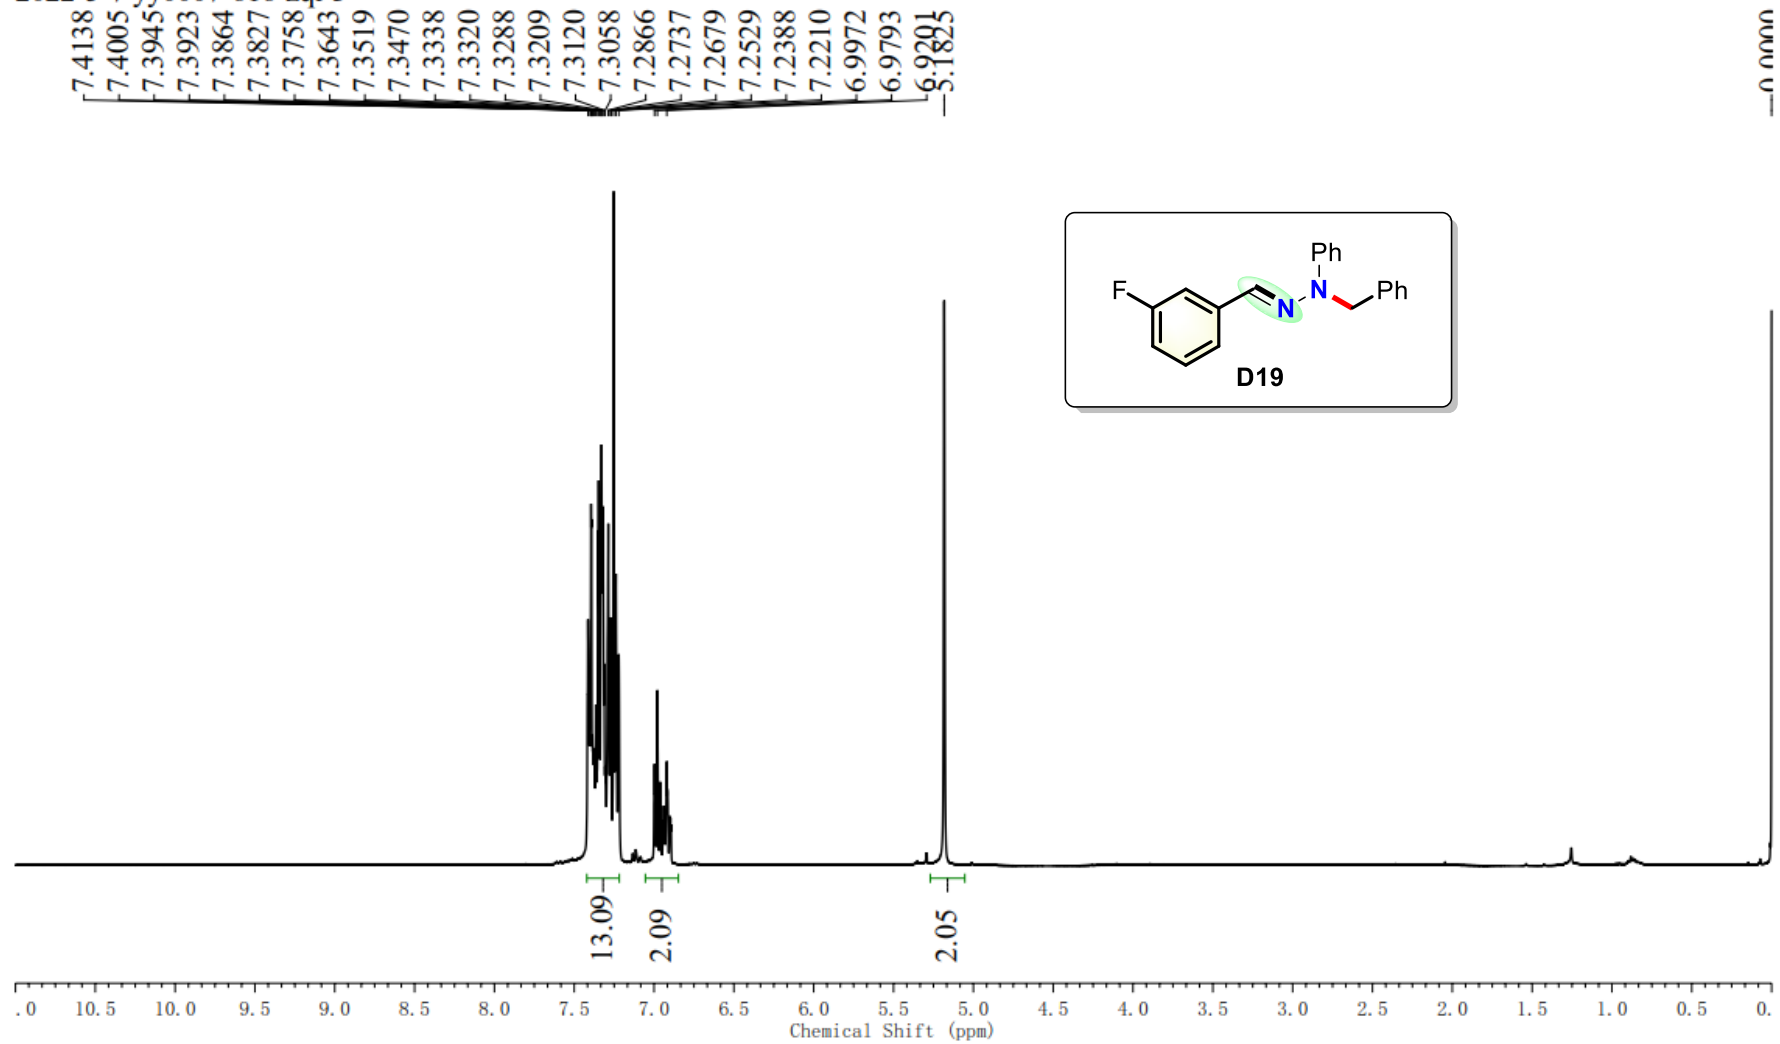

2022-05-10 YY0043-616-lqq-3

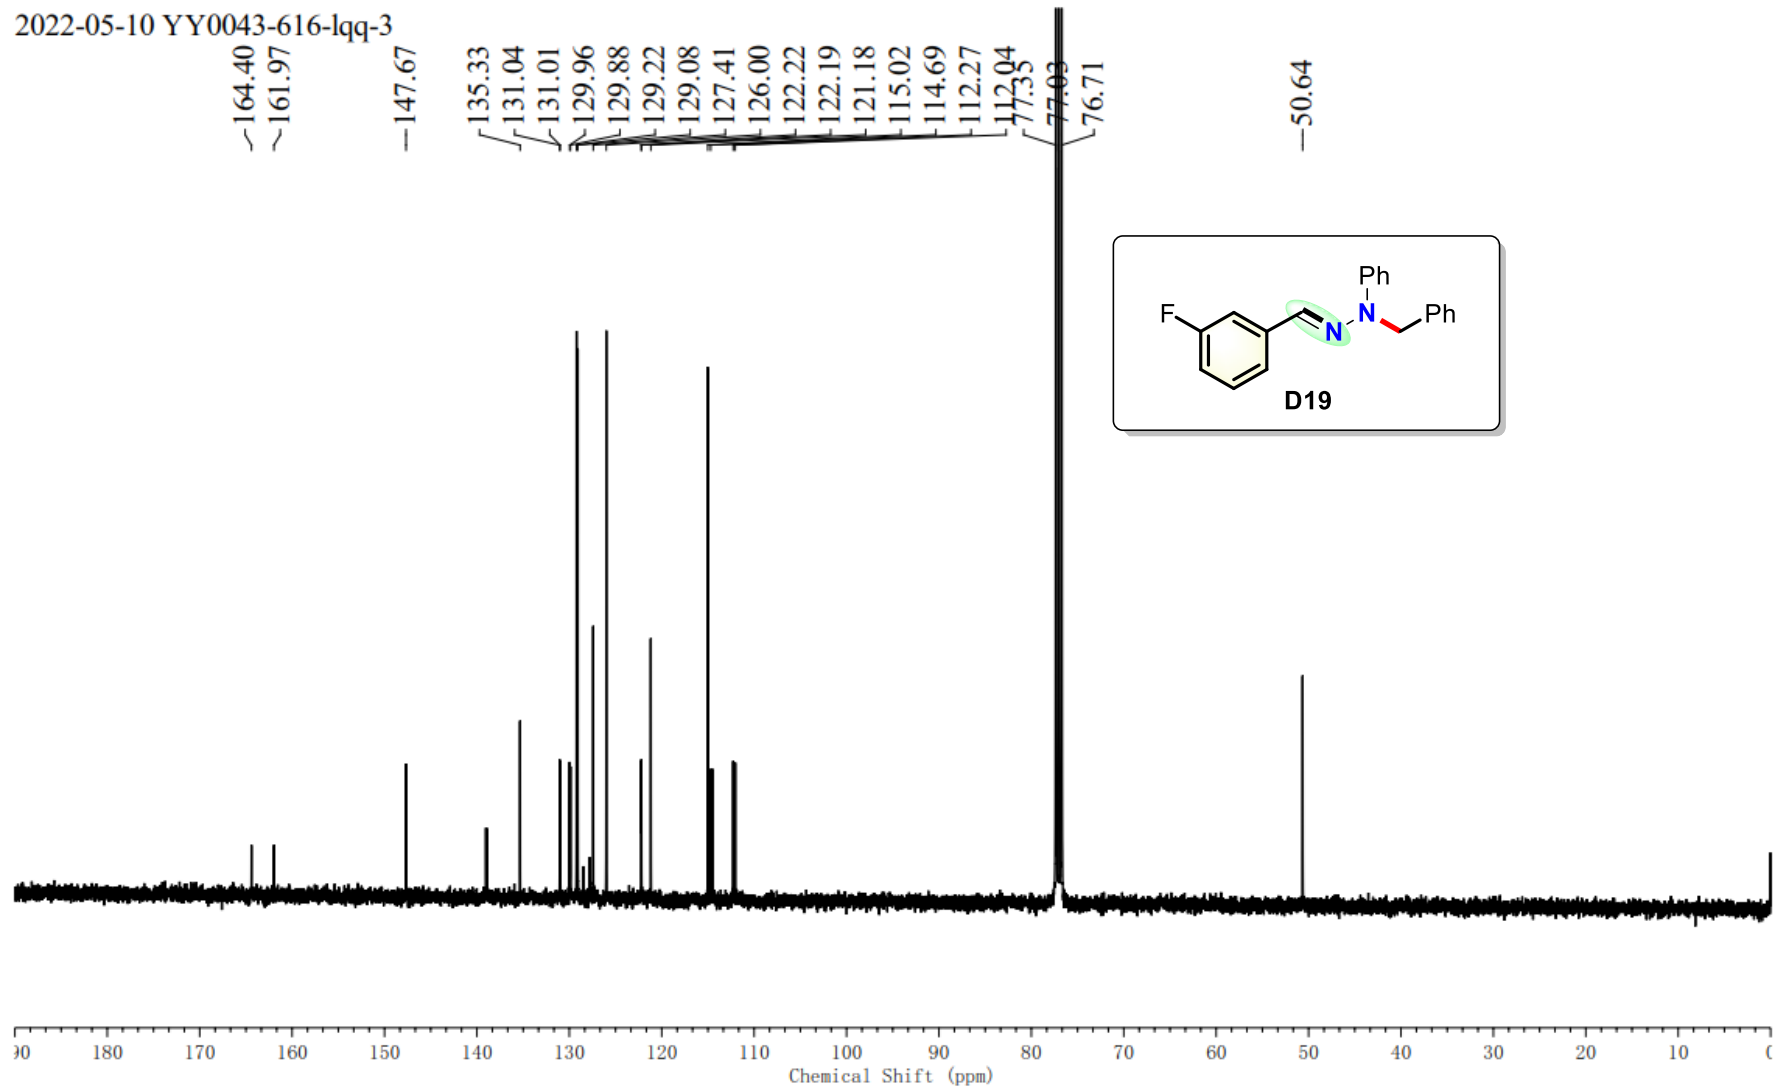

2022-05-10 YY0043-616-lqq-3

--113.4462

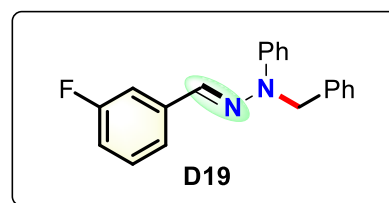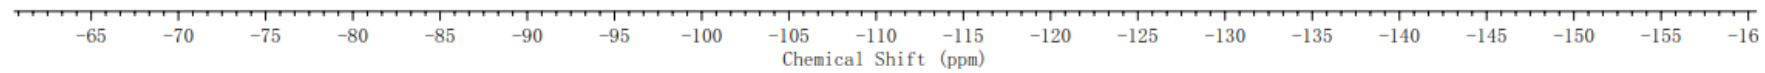

2022-04-27-yy0005-616-zgy-8

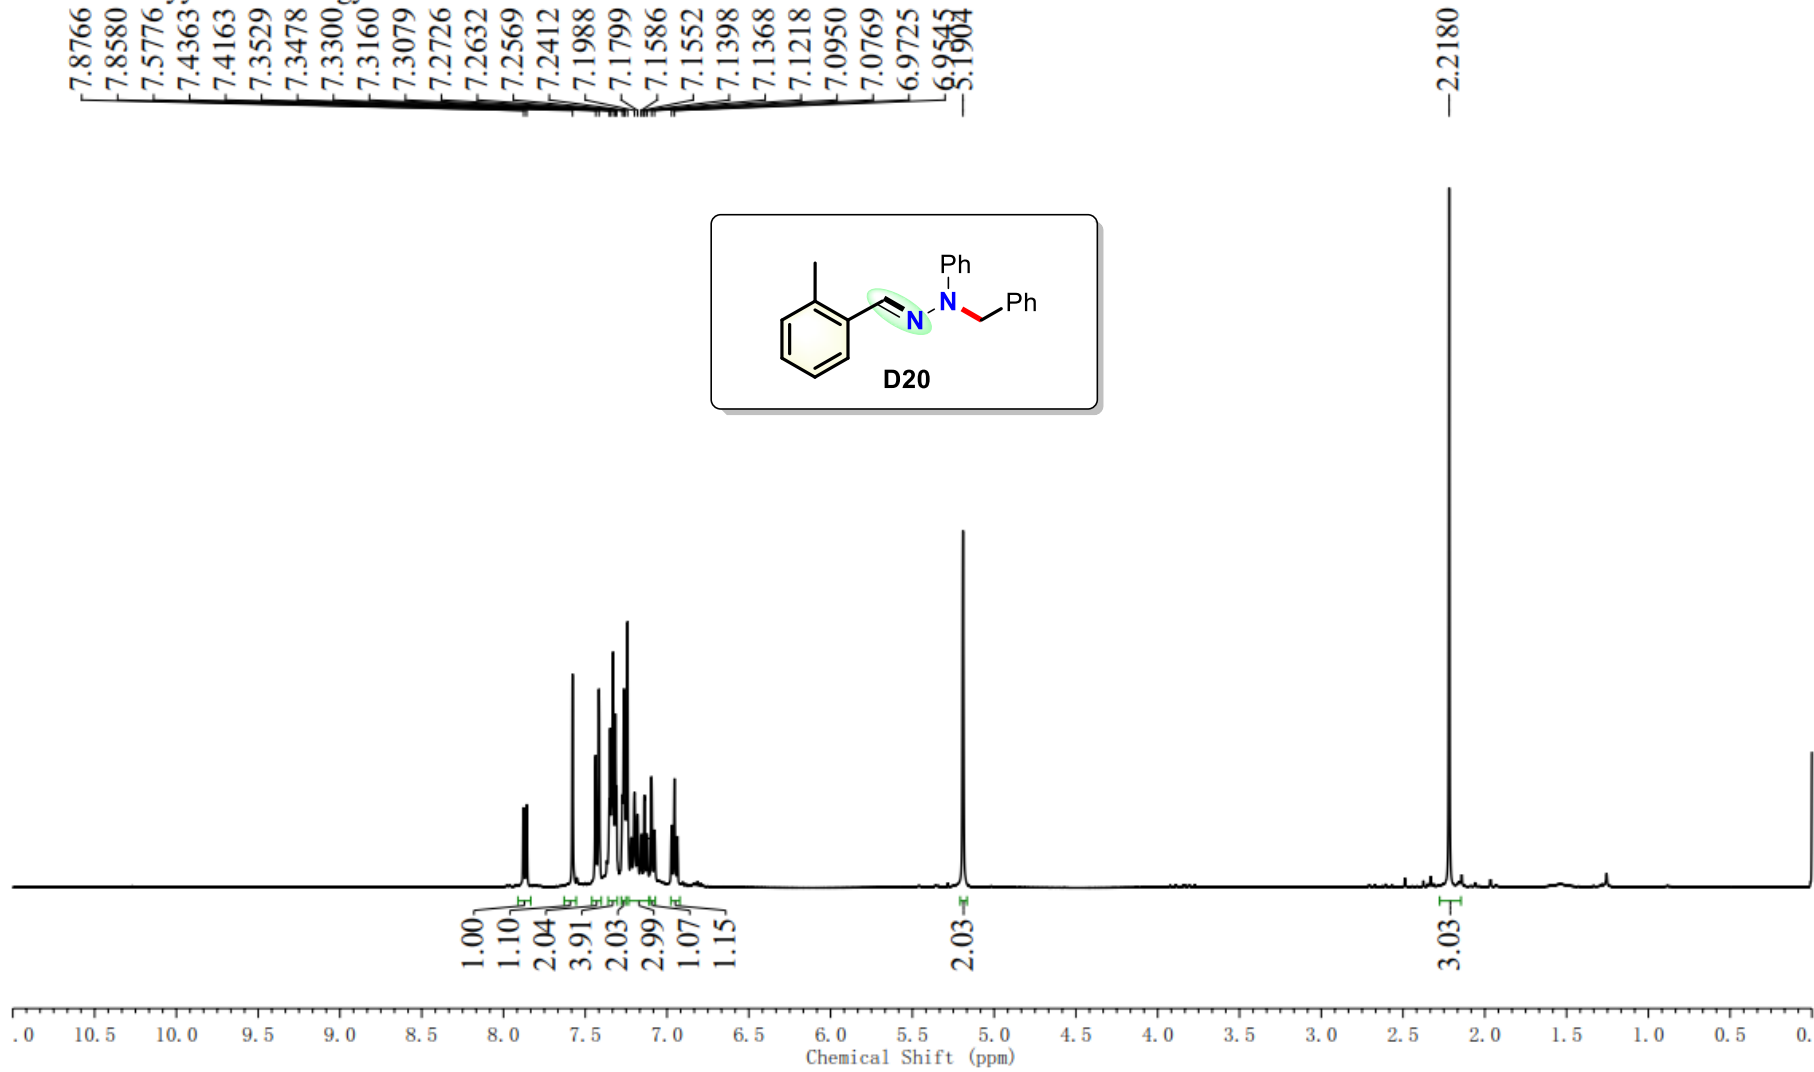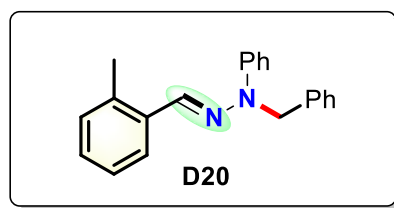

2022-04-29-YY0034-616-ZGY-8

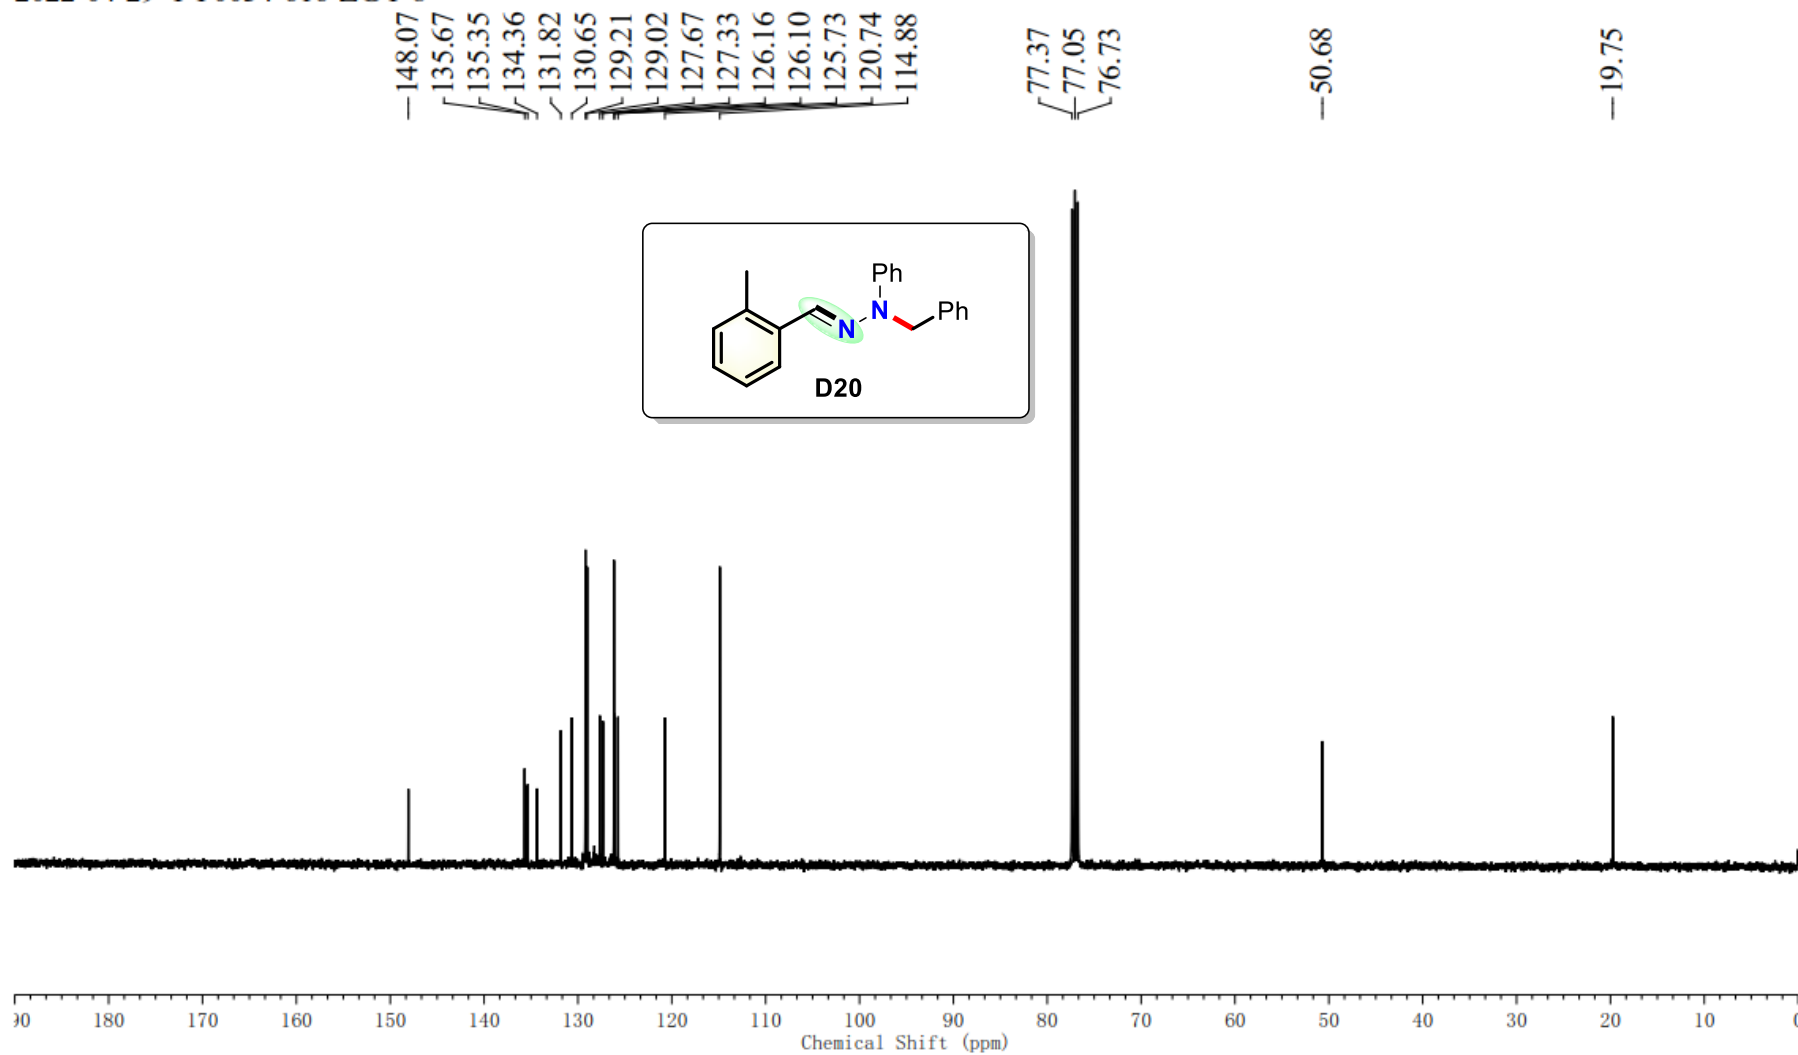

2022-5-7 yy0007-616-zq1-8

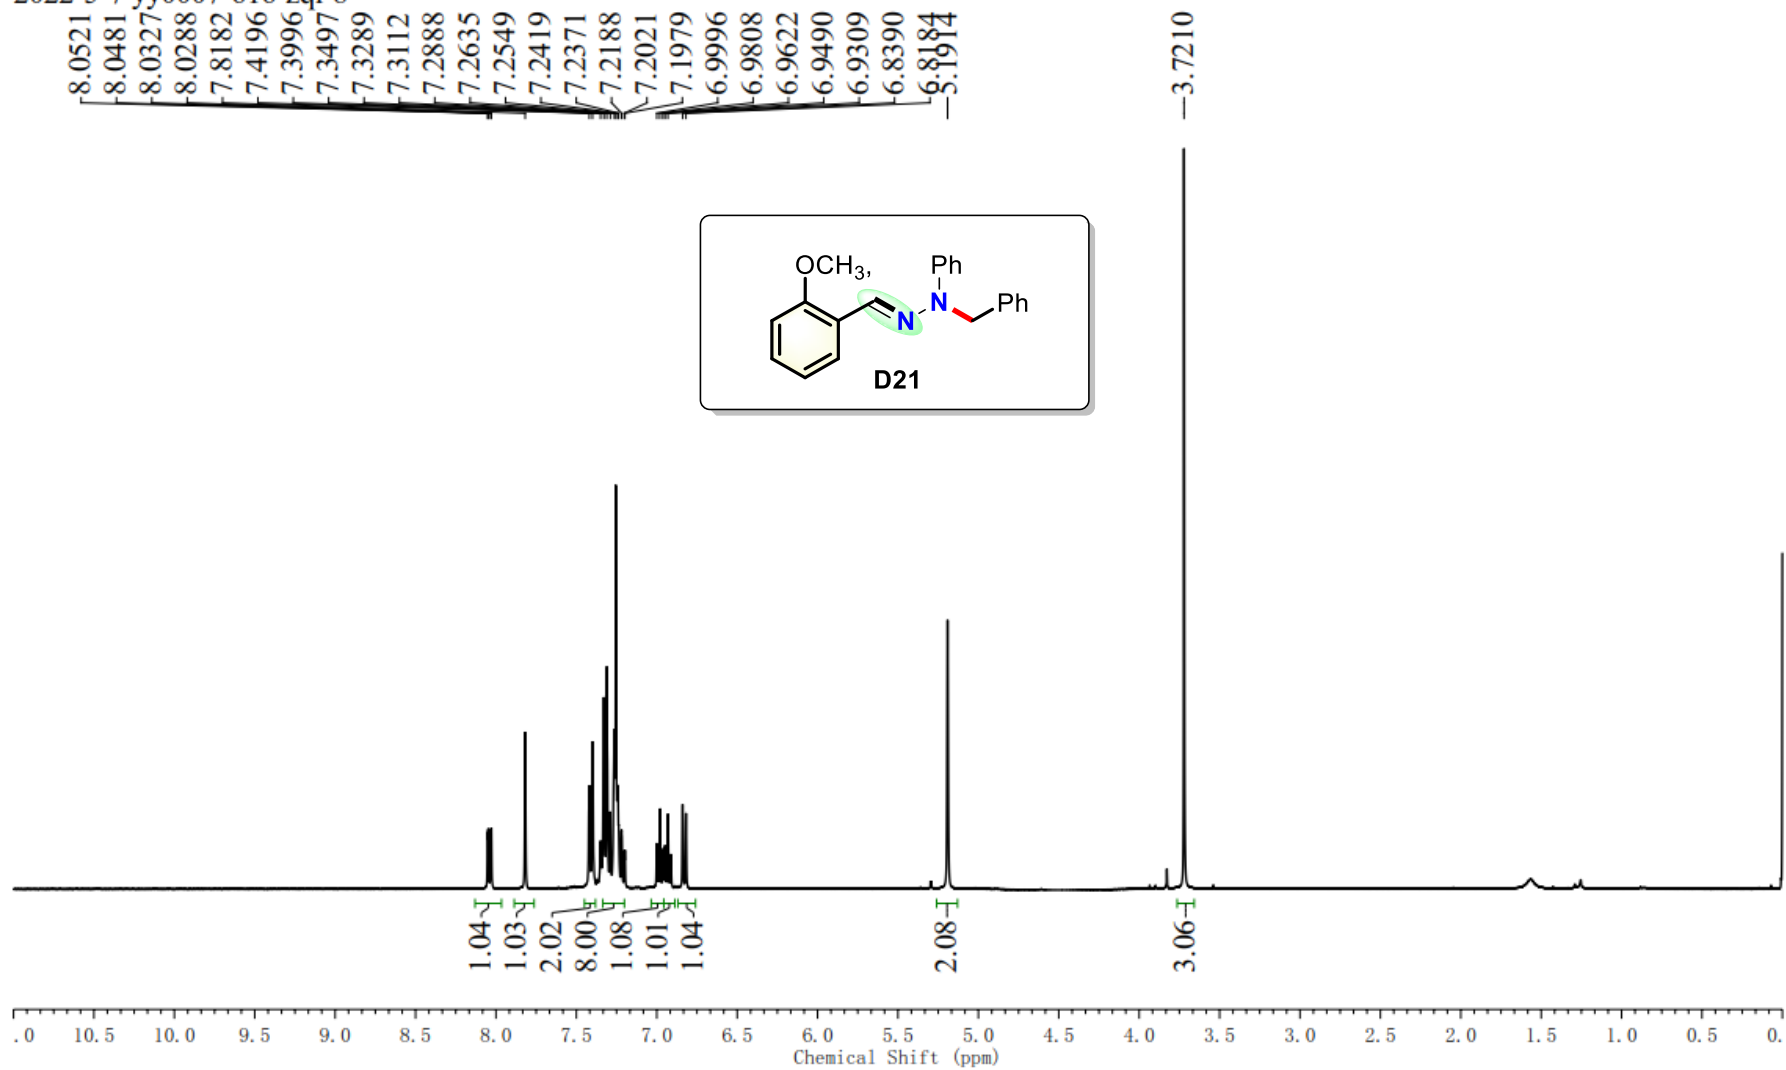

2022-05-10 YY0018-616-zql-8

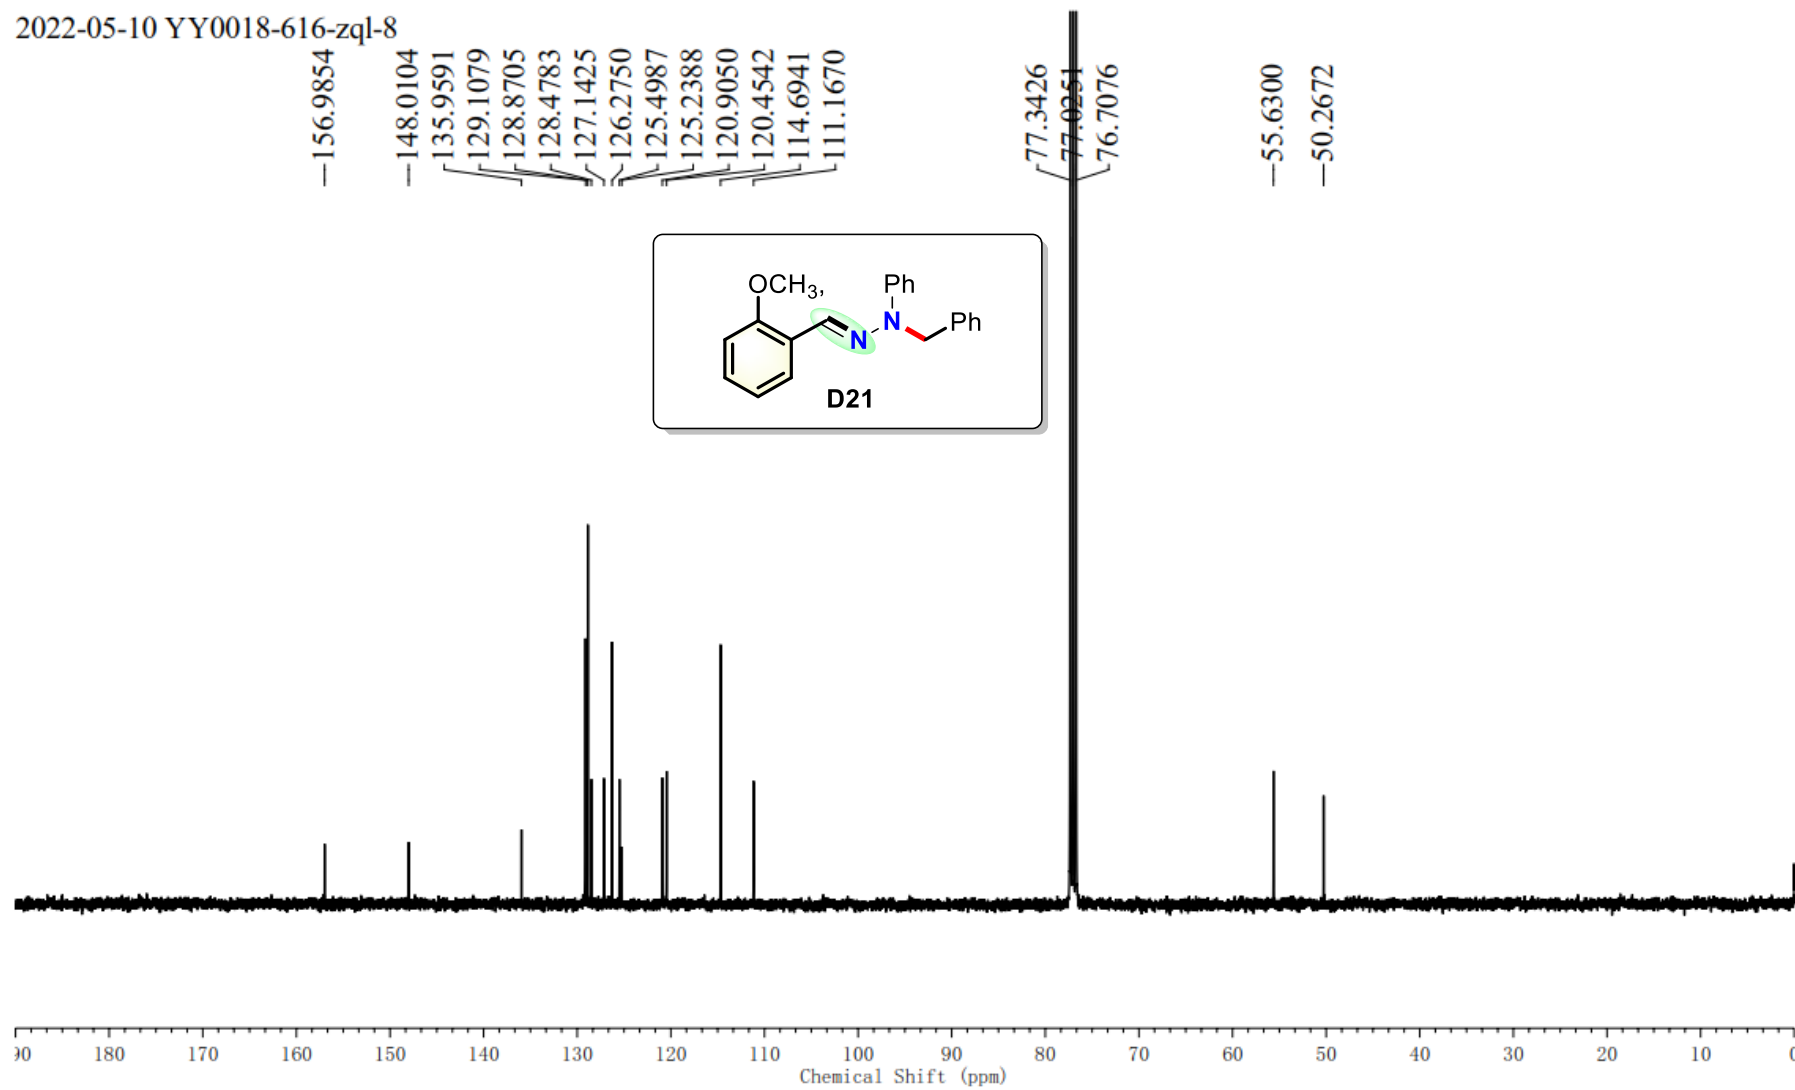

2022-5-7 yy0007-616-zql-9

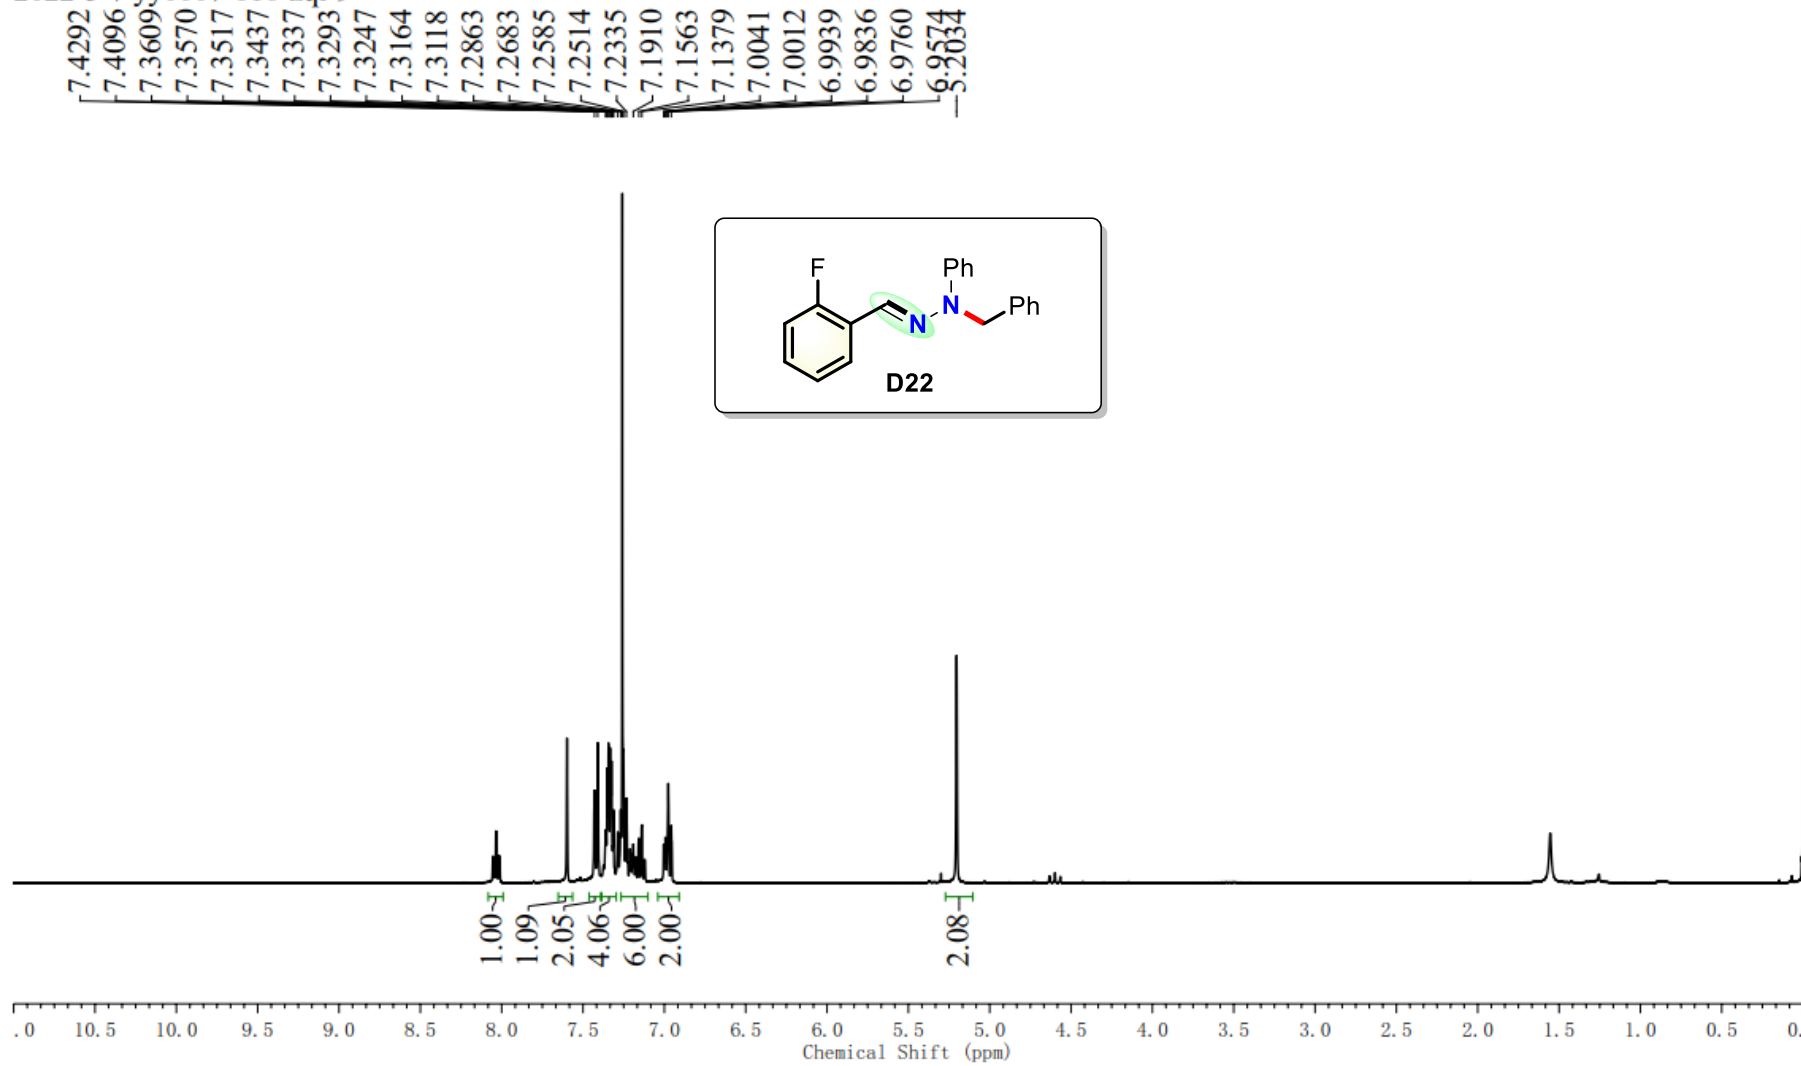



2022-05-10 YY0043-616-lqq-9

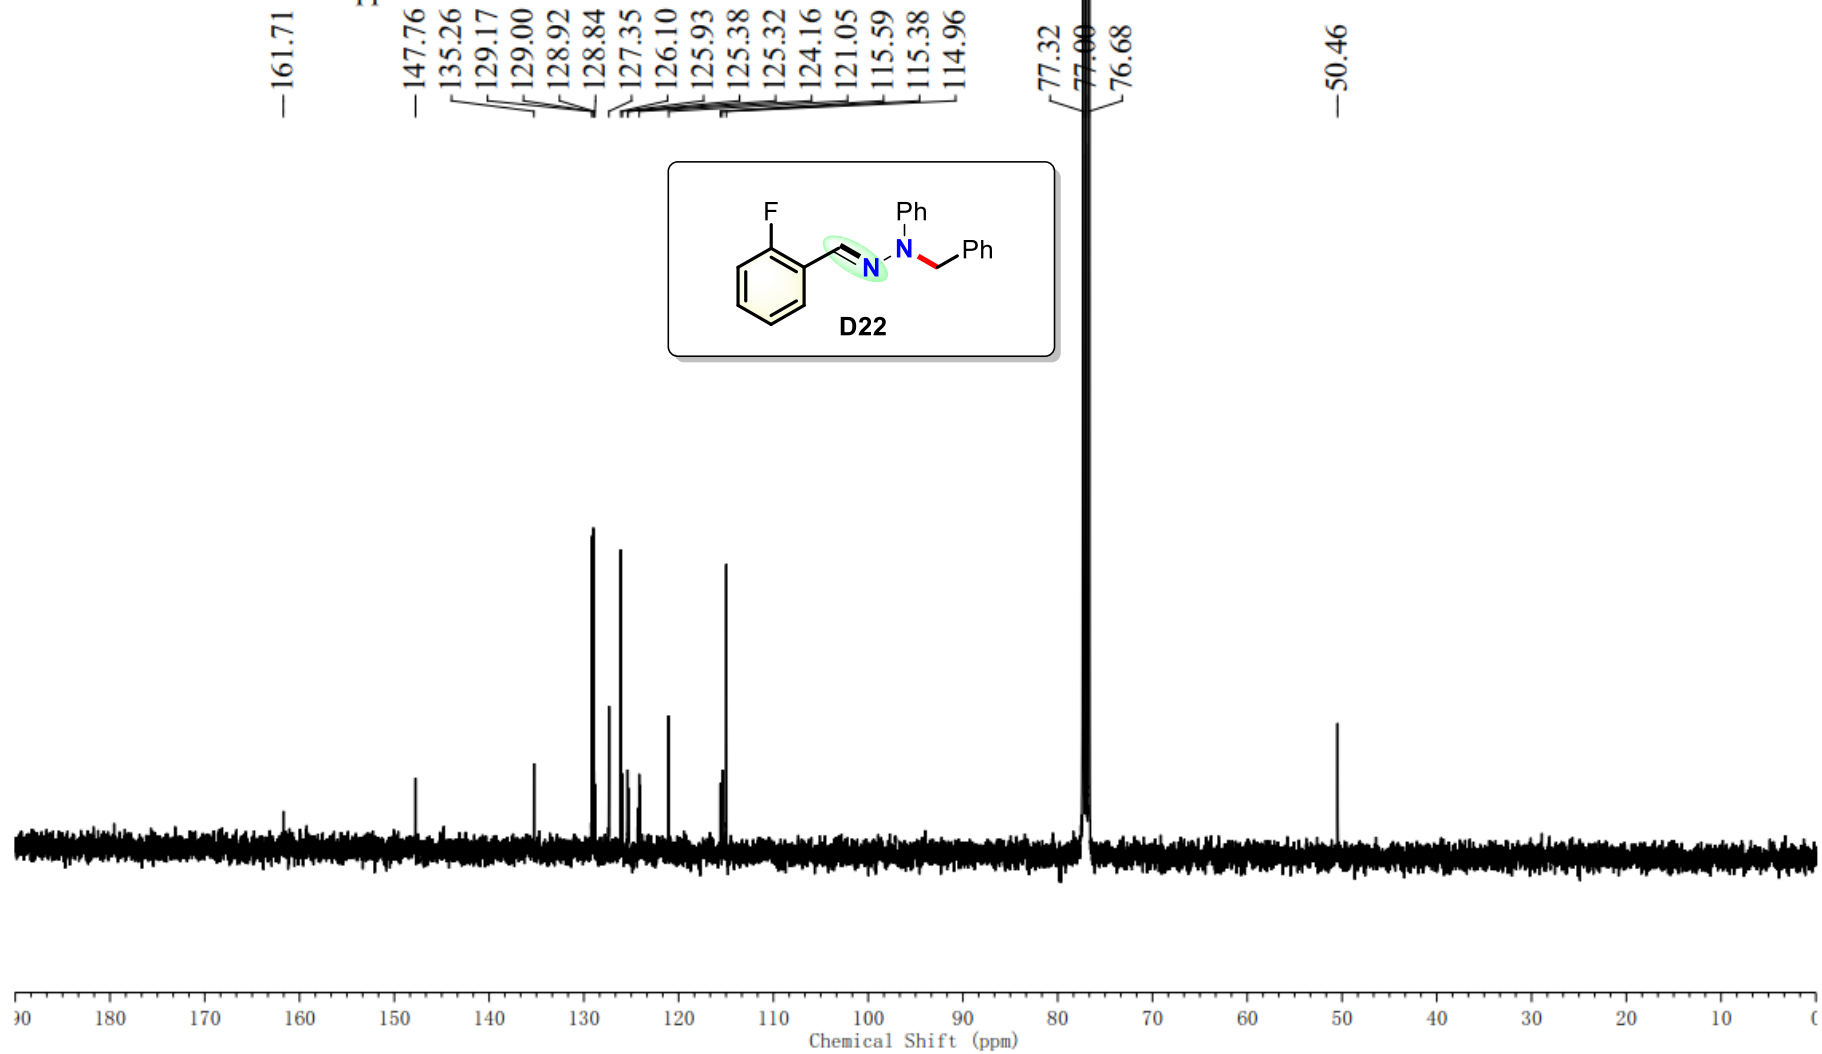

2022-05-10 YY0043-616-lqq-9

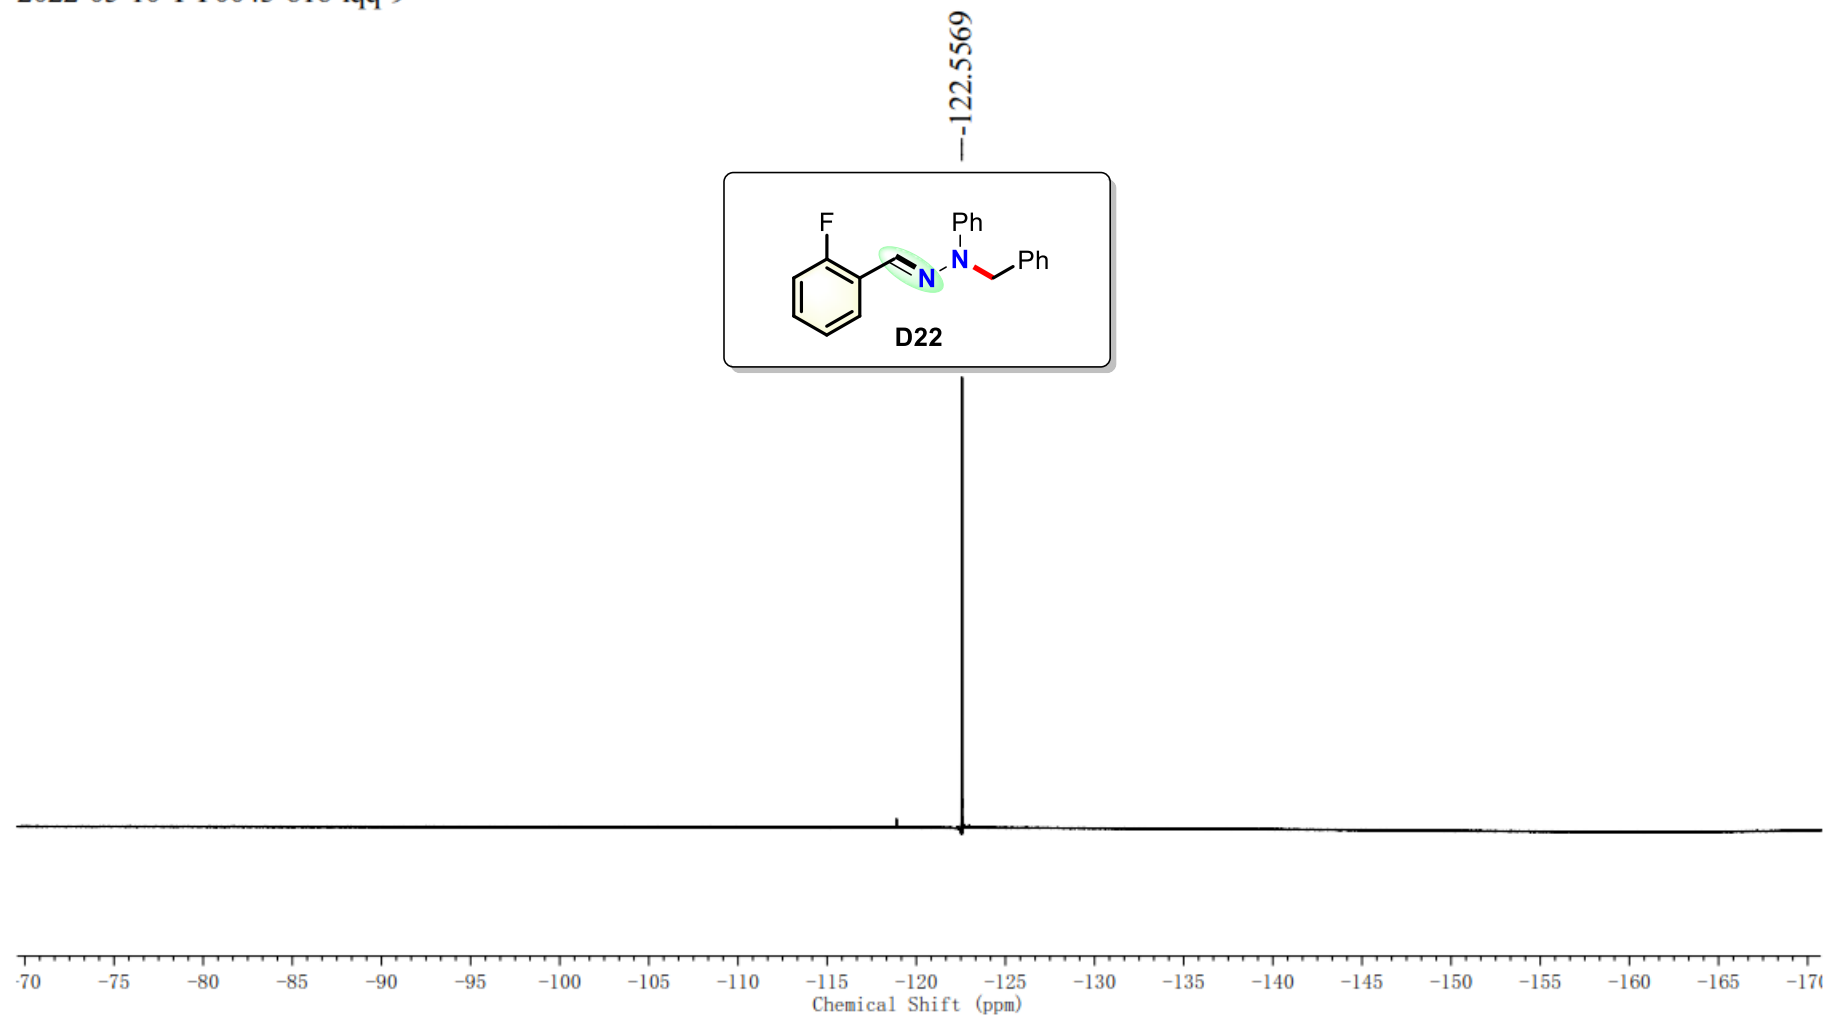

2022-5-7 yy0007-616-zql-6

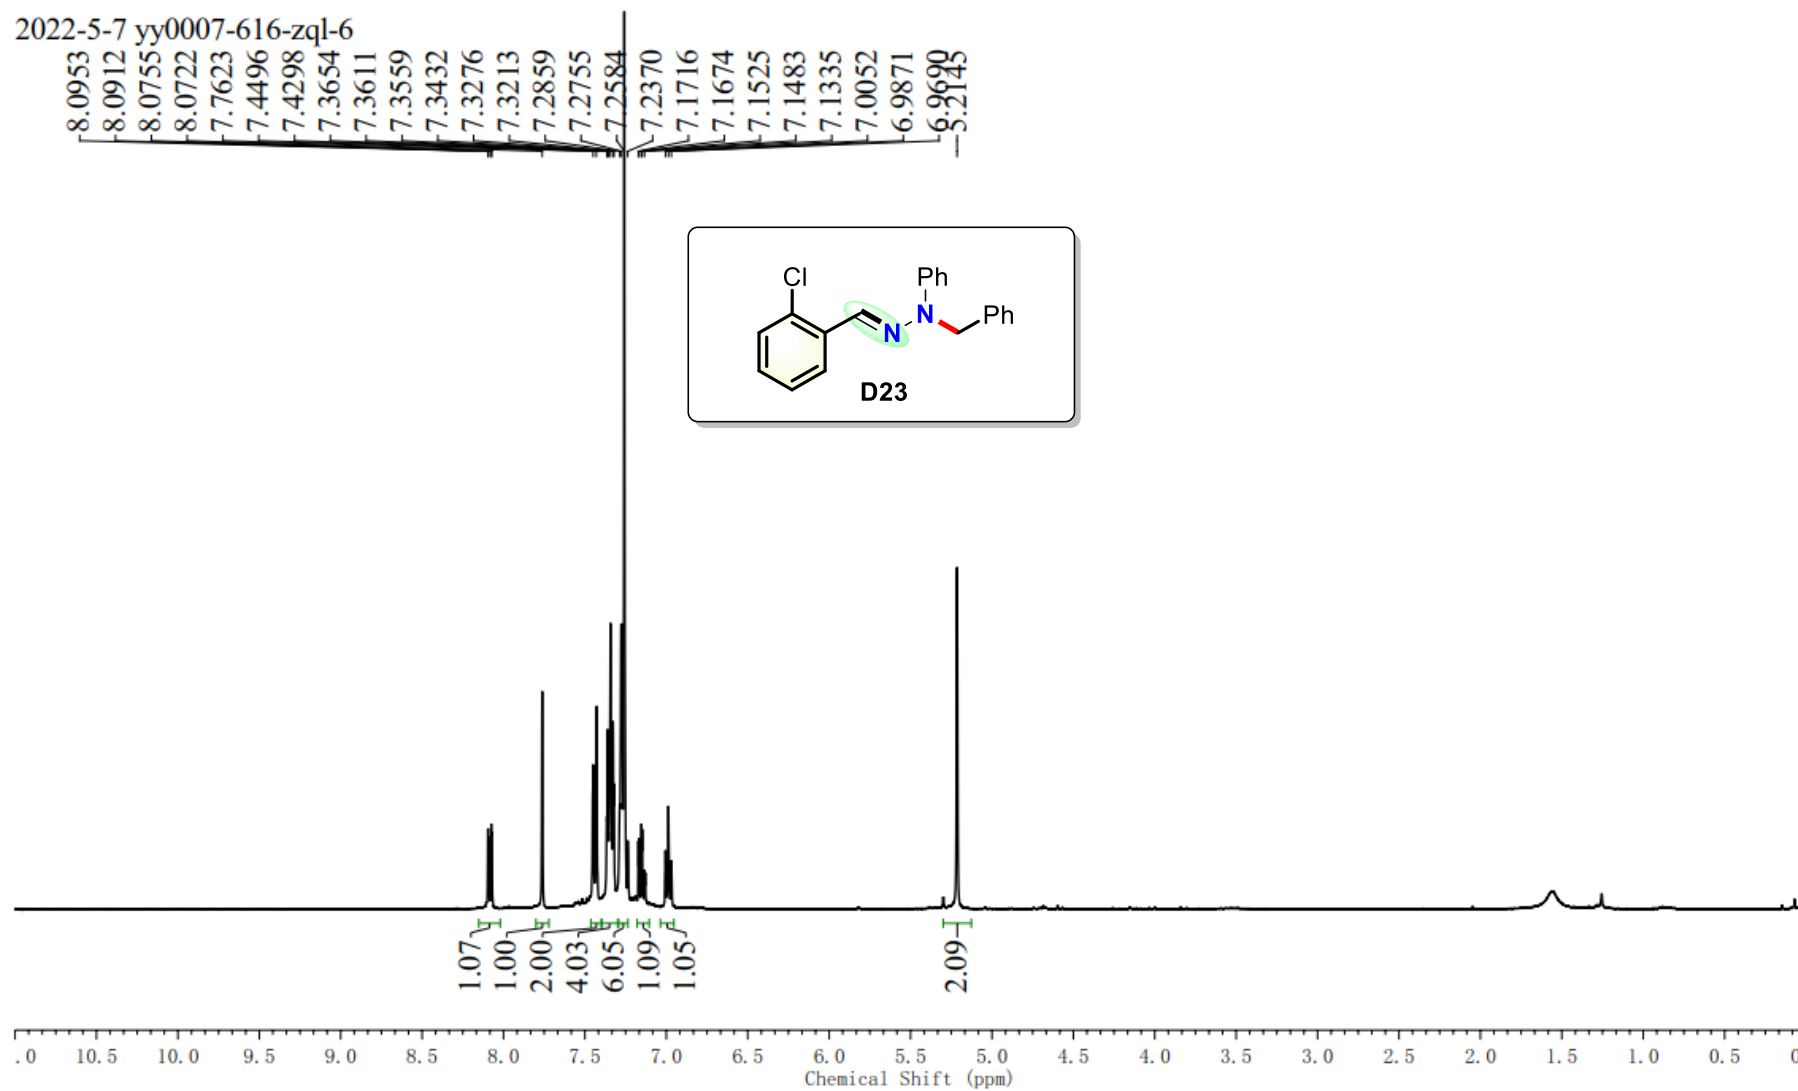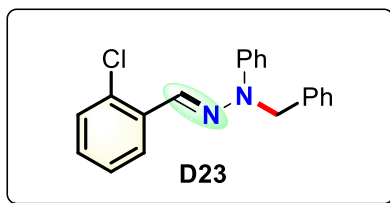

2022-05-10 YY0018-616-zql-6

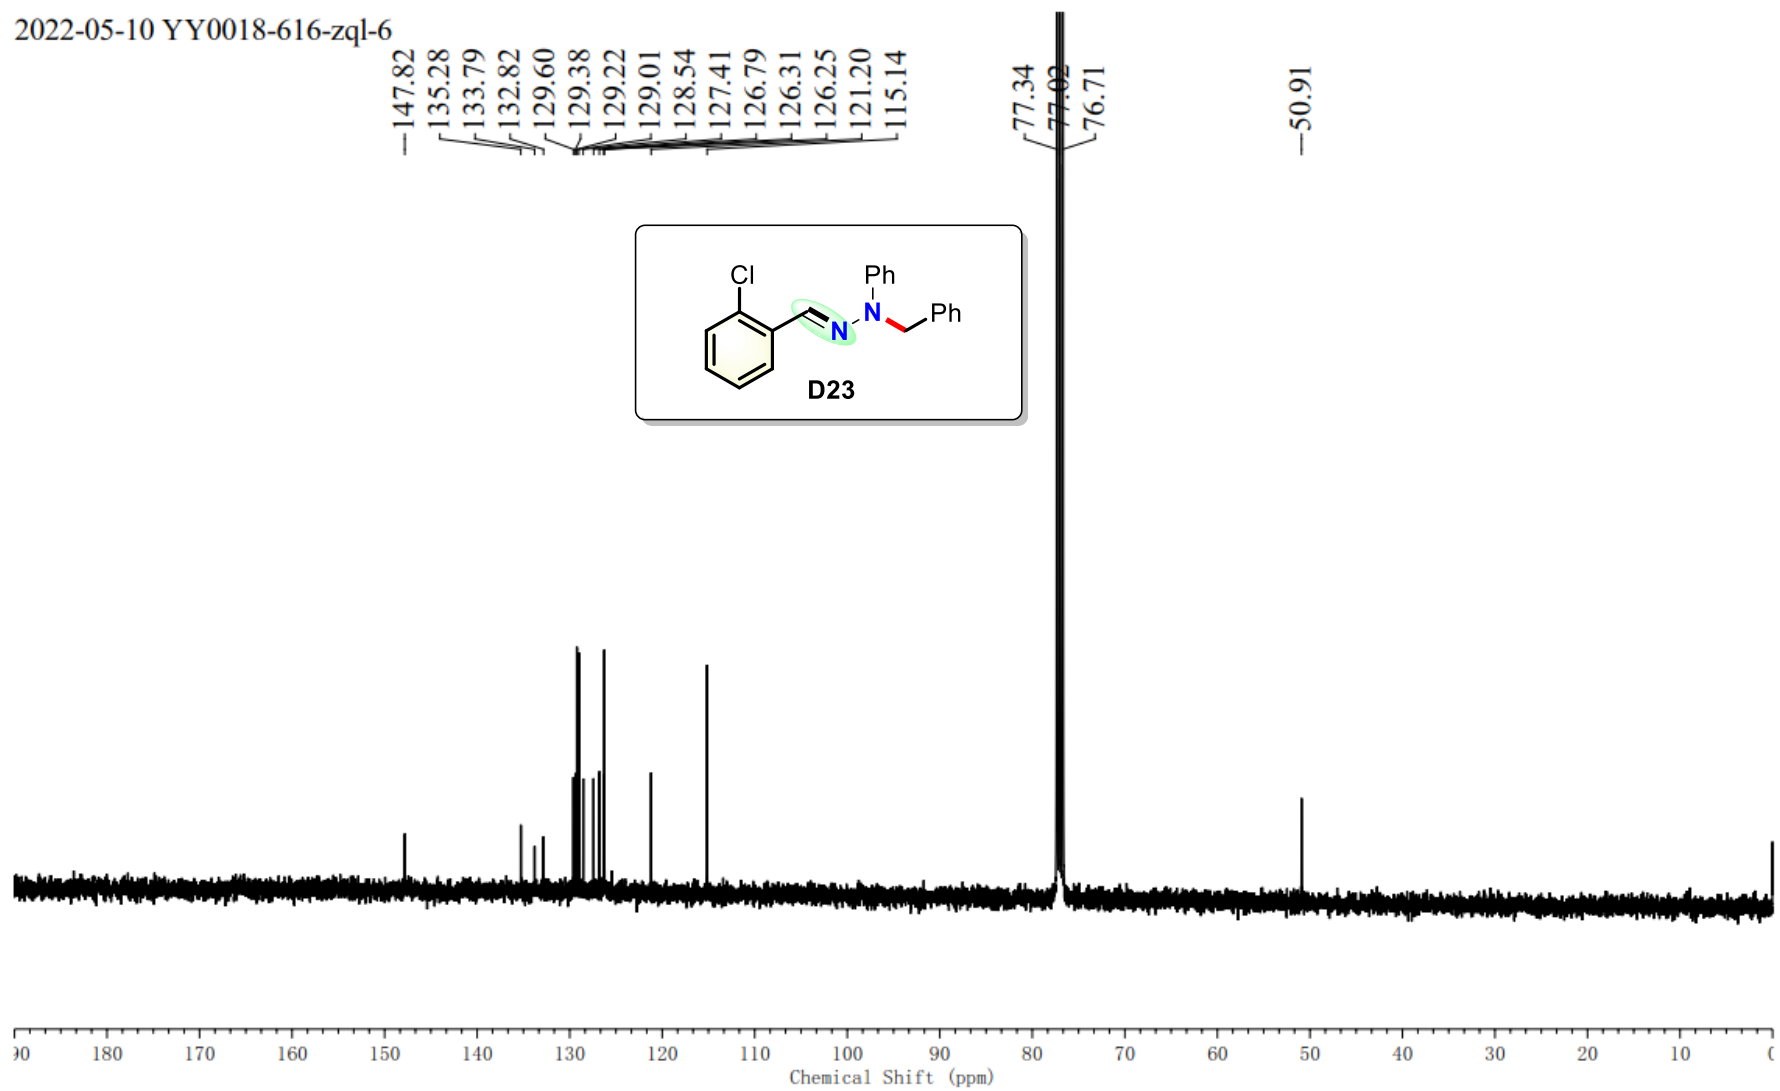

2022-05-31-YY0003-616-0531-1

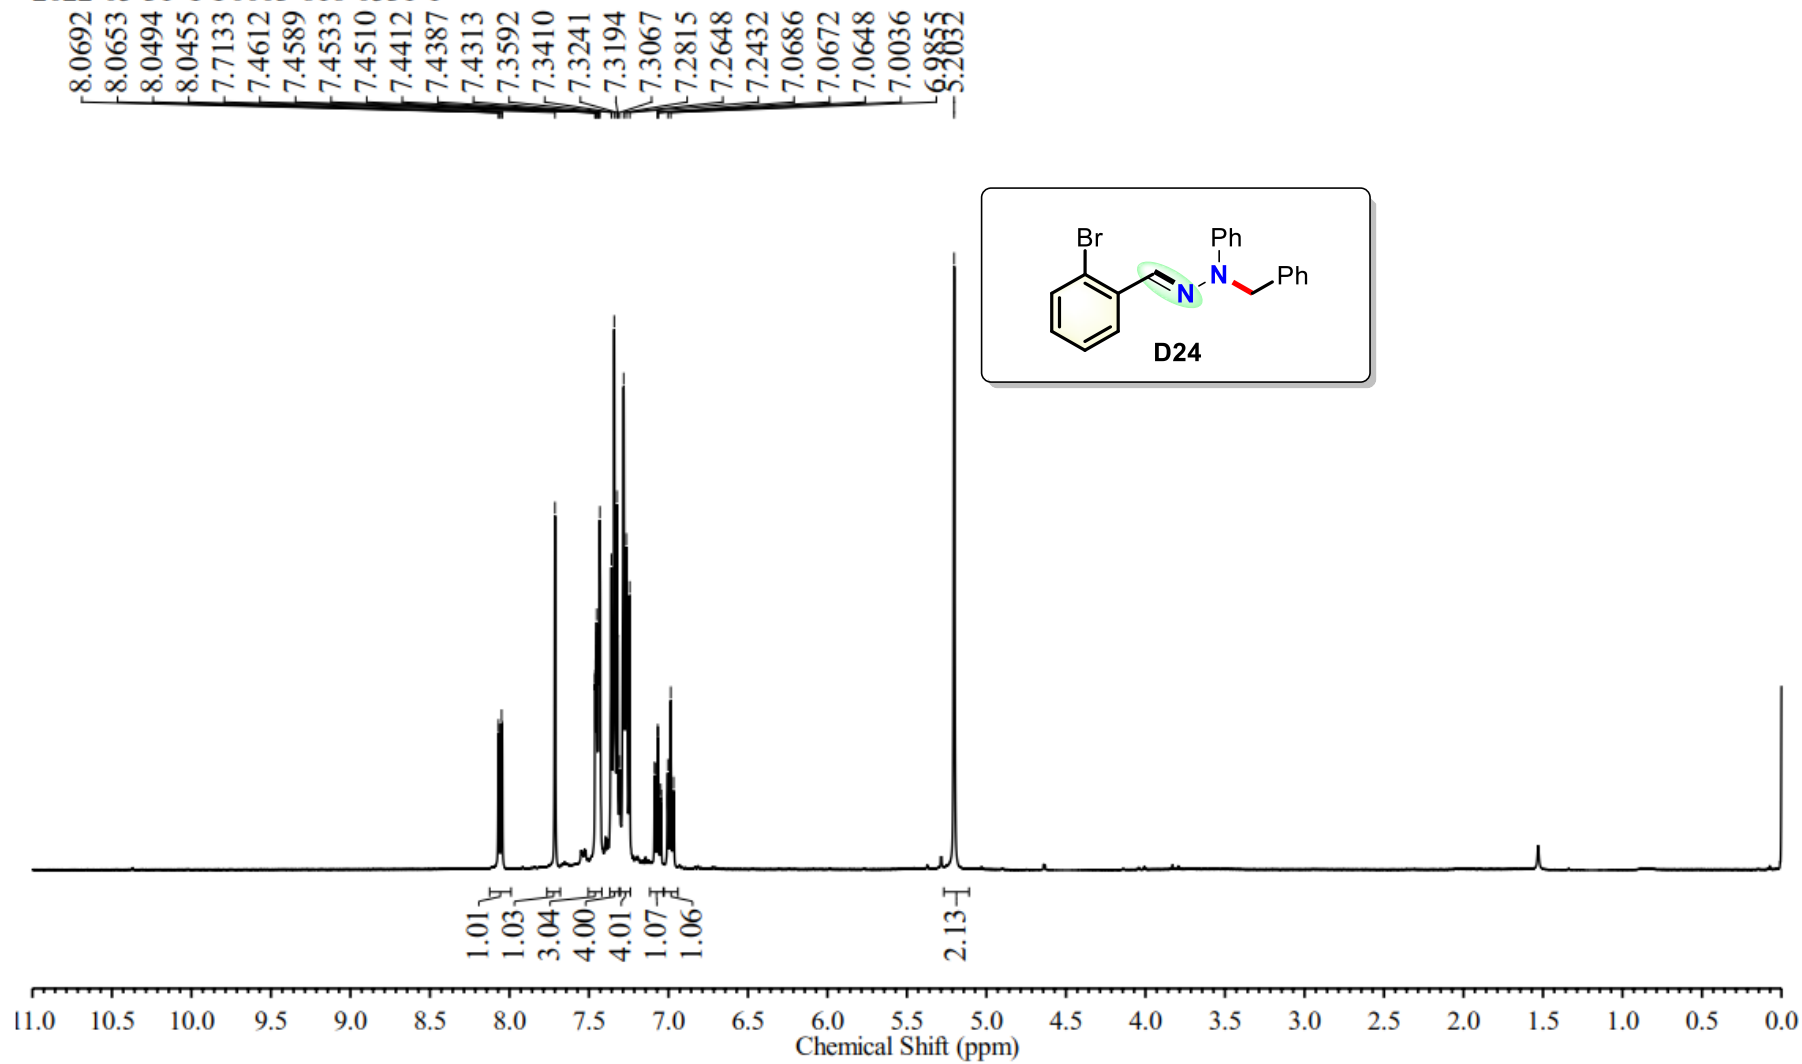

2022-6-6 YY0045-616-ZQL-1

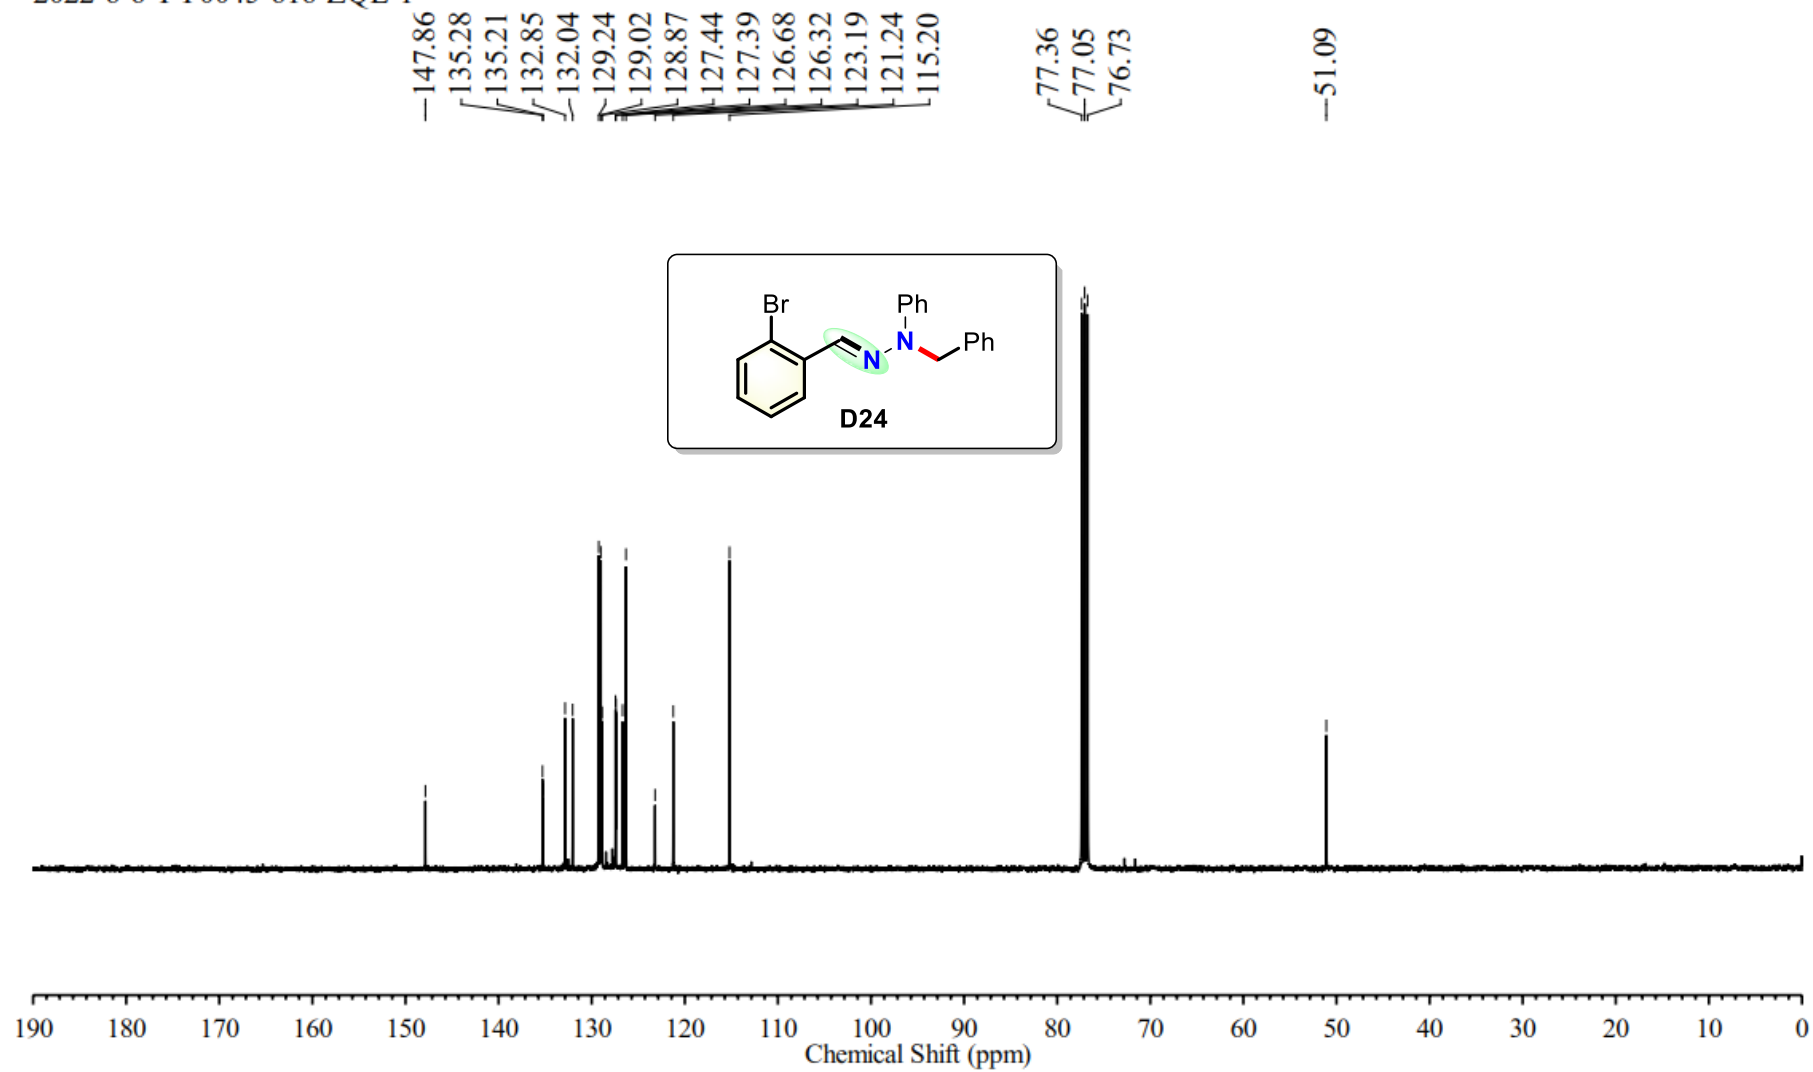

2022-05-31-YY0003-616-0531-2

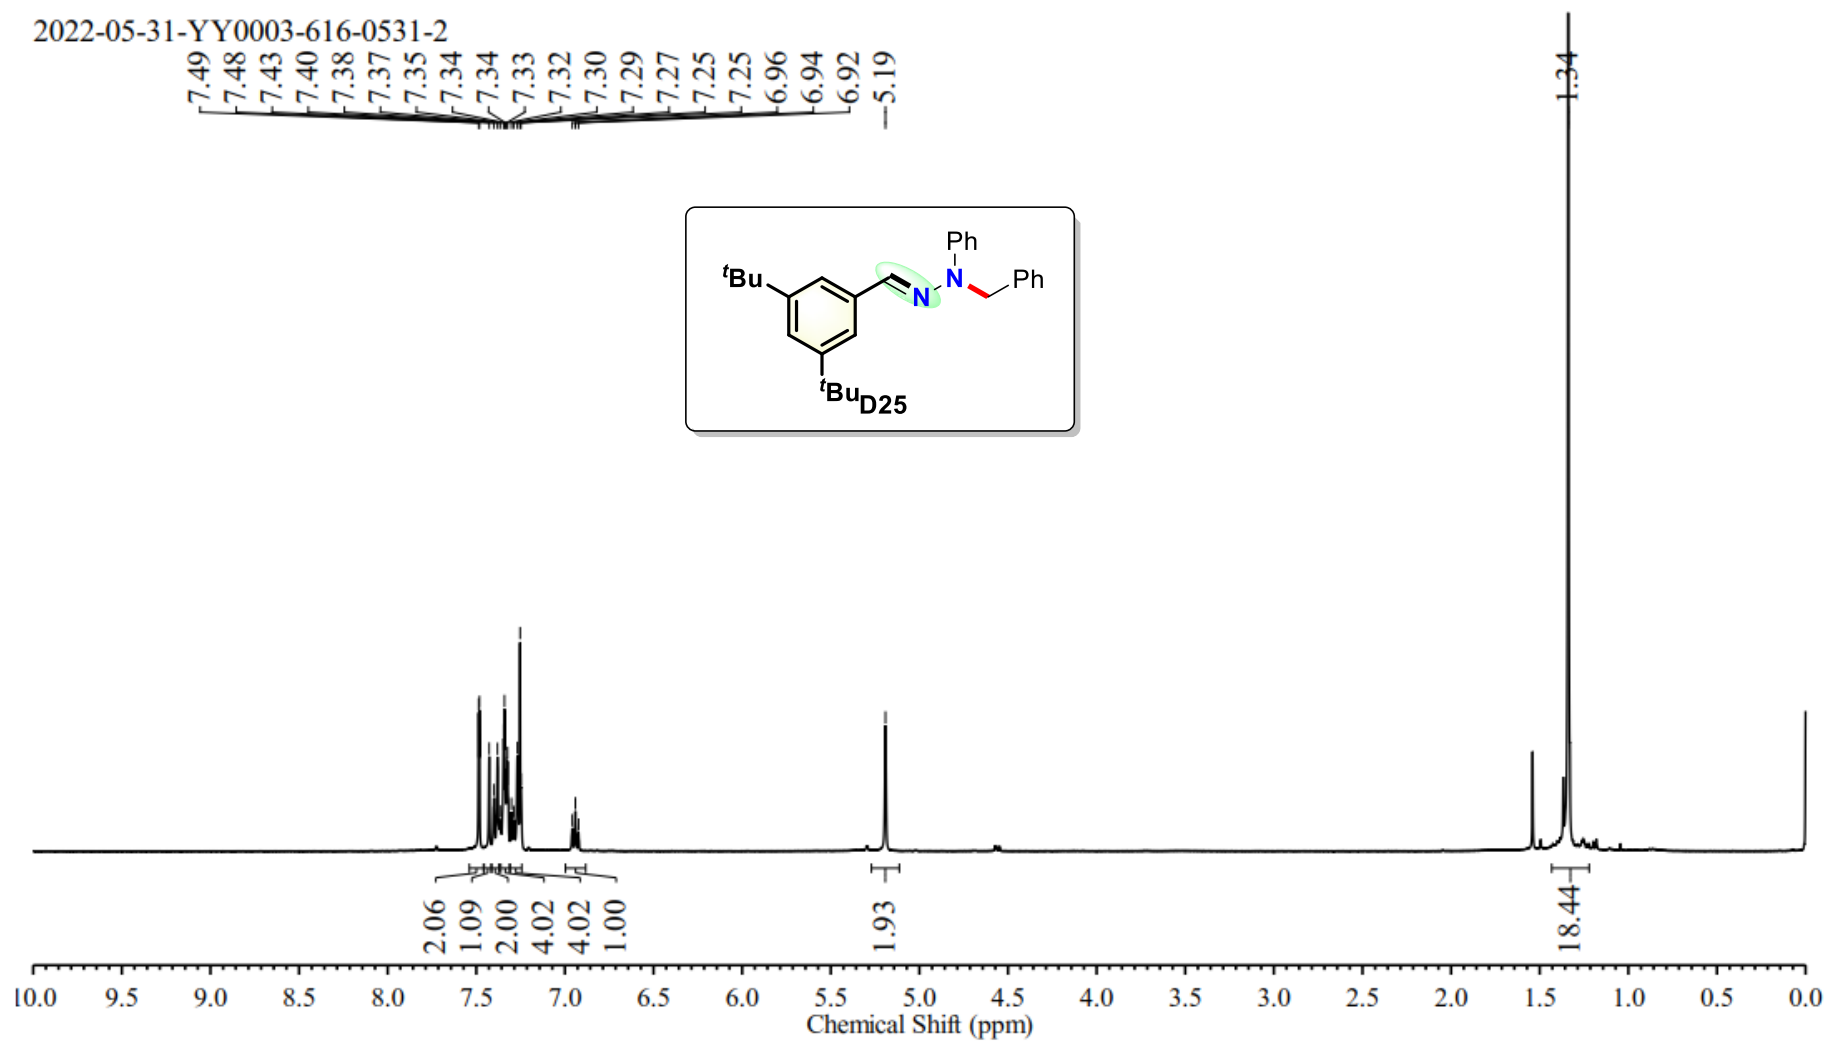

2022-6-6 YY0045-616-ZQL-2

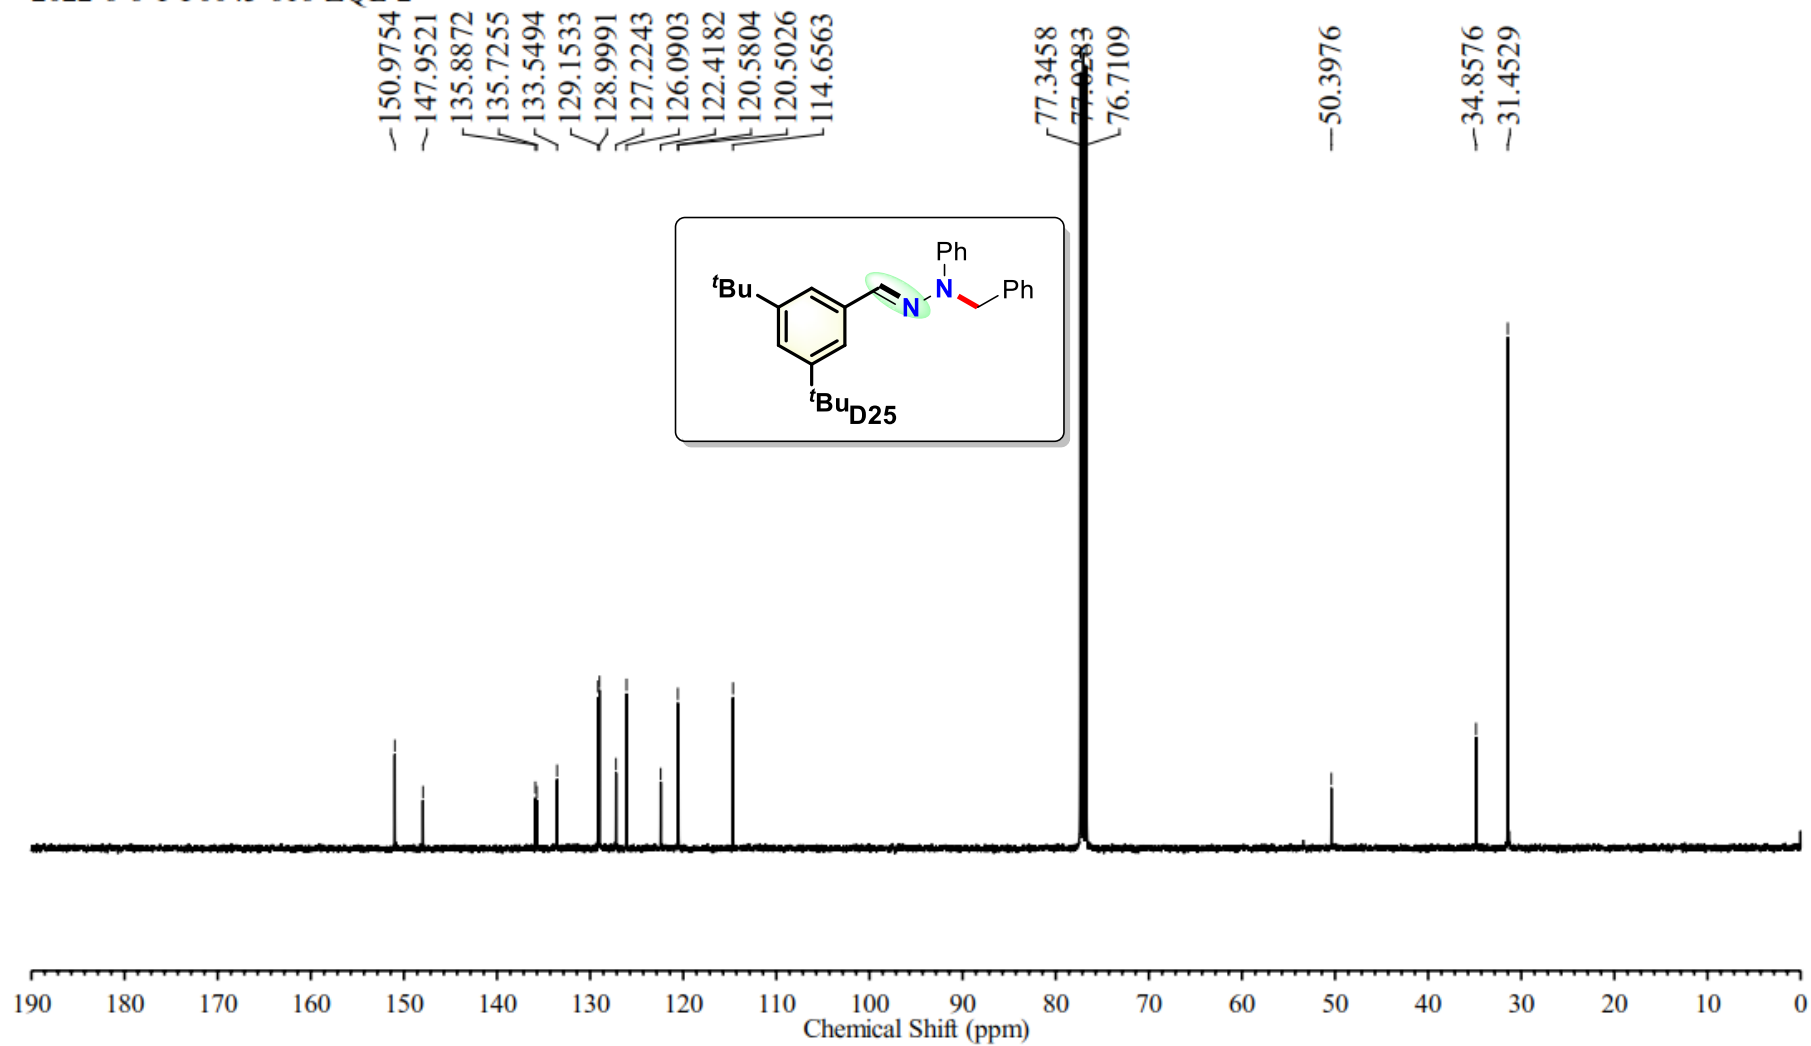



2022-5-7 yy0007-616-zql-5

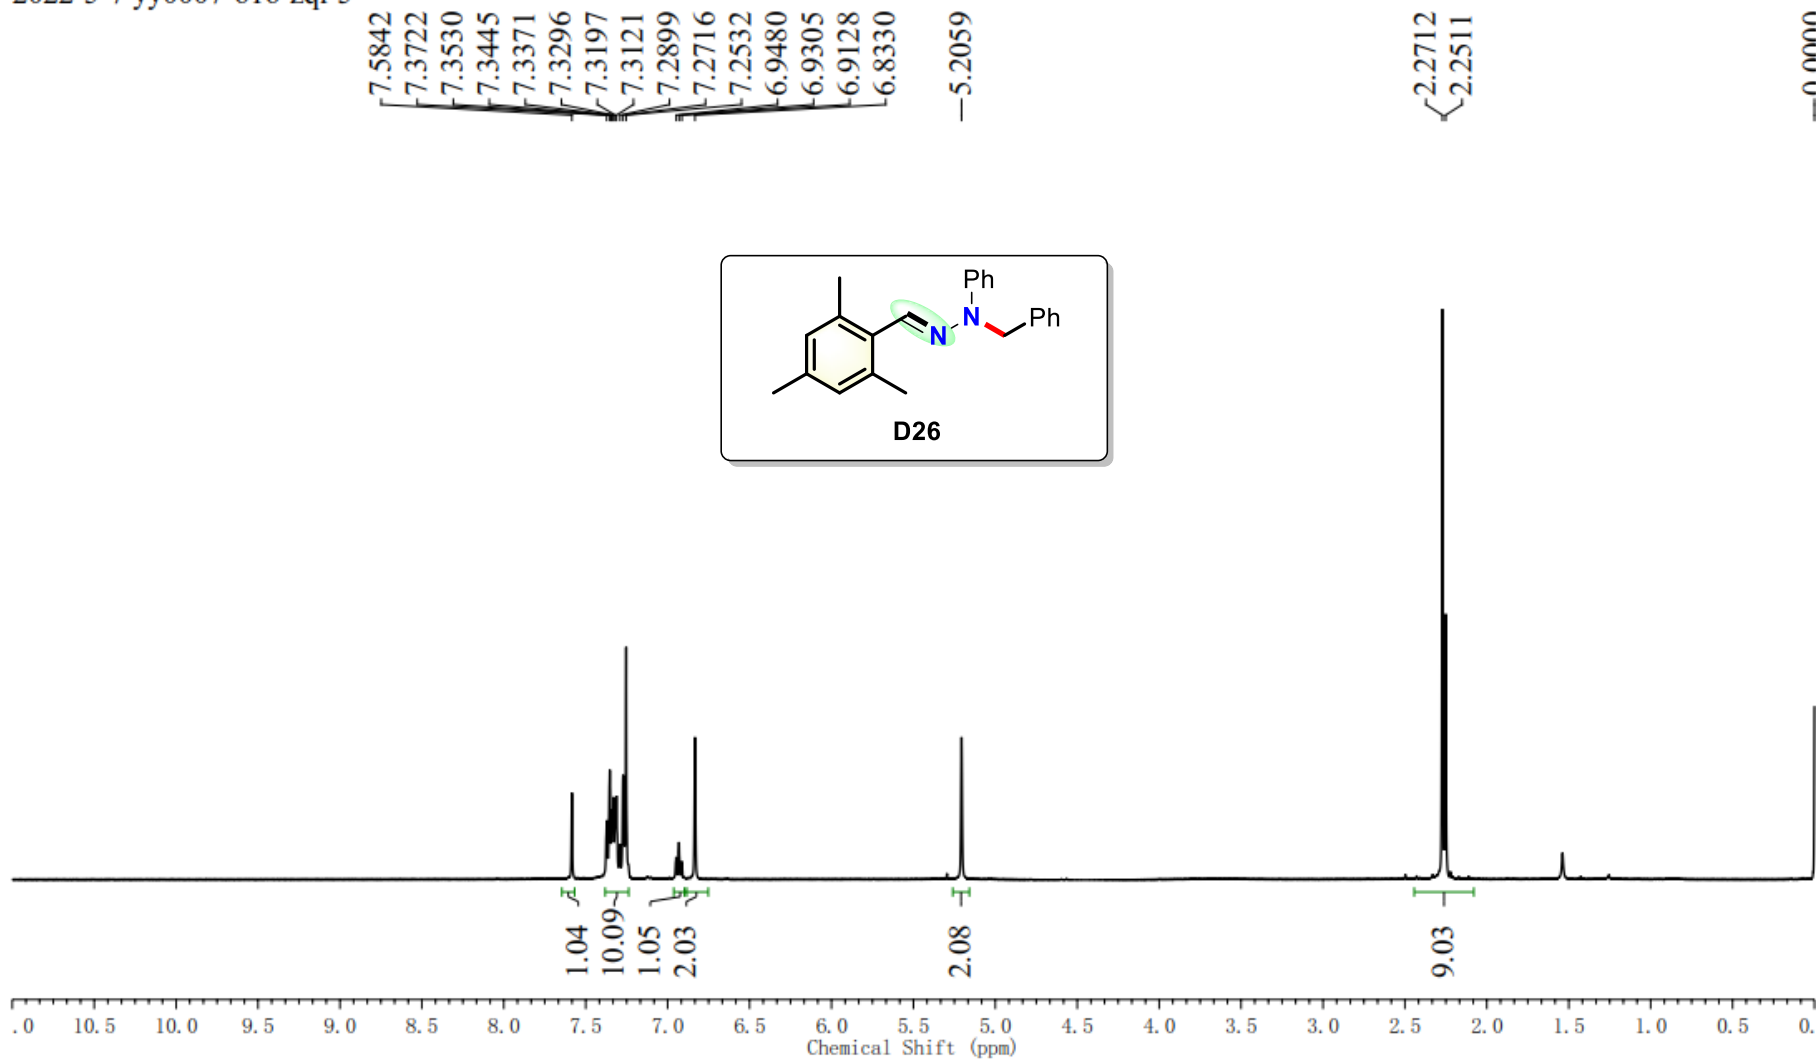

2022-05-10 YY0018-616-zql-5

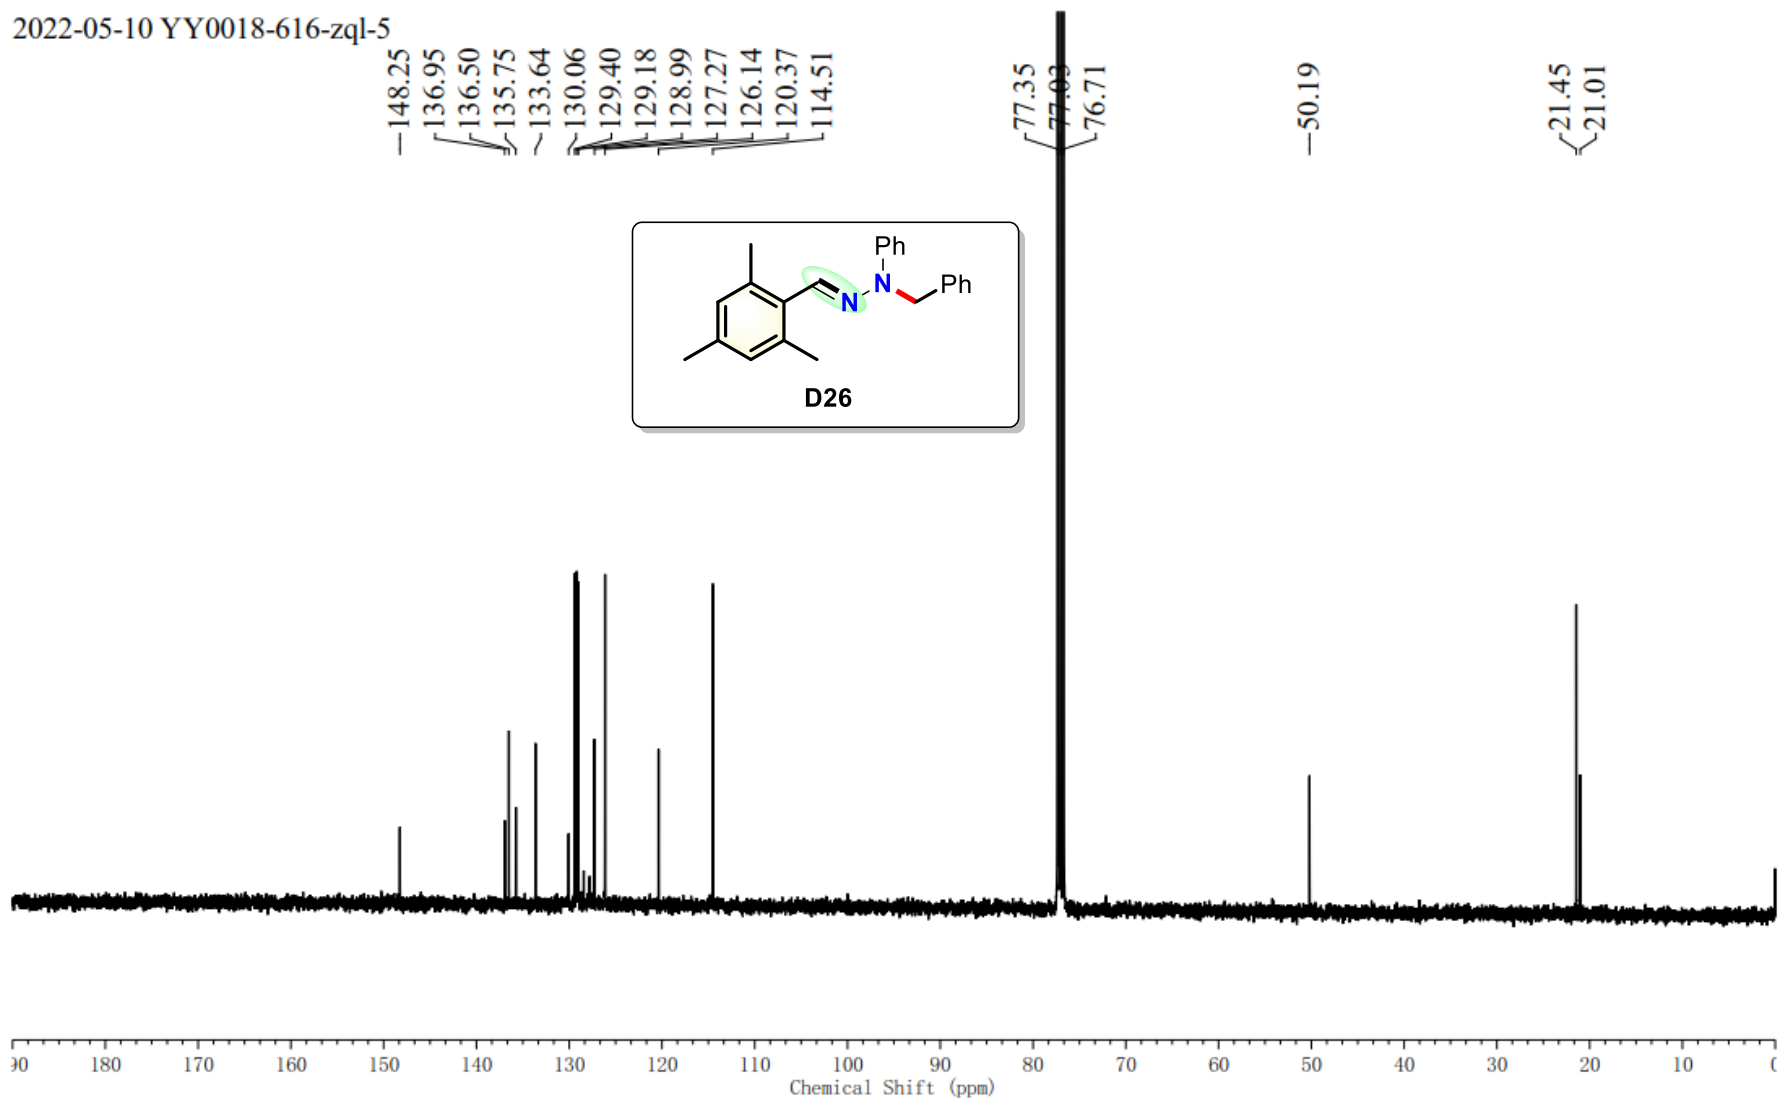

2022-05-18-yy0043-616-zql-1

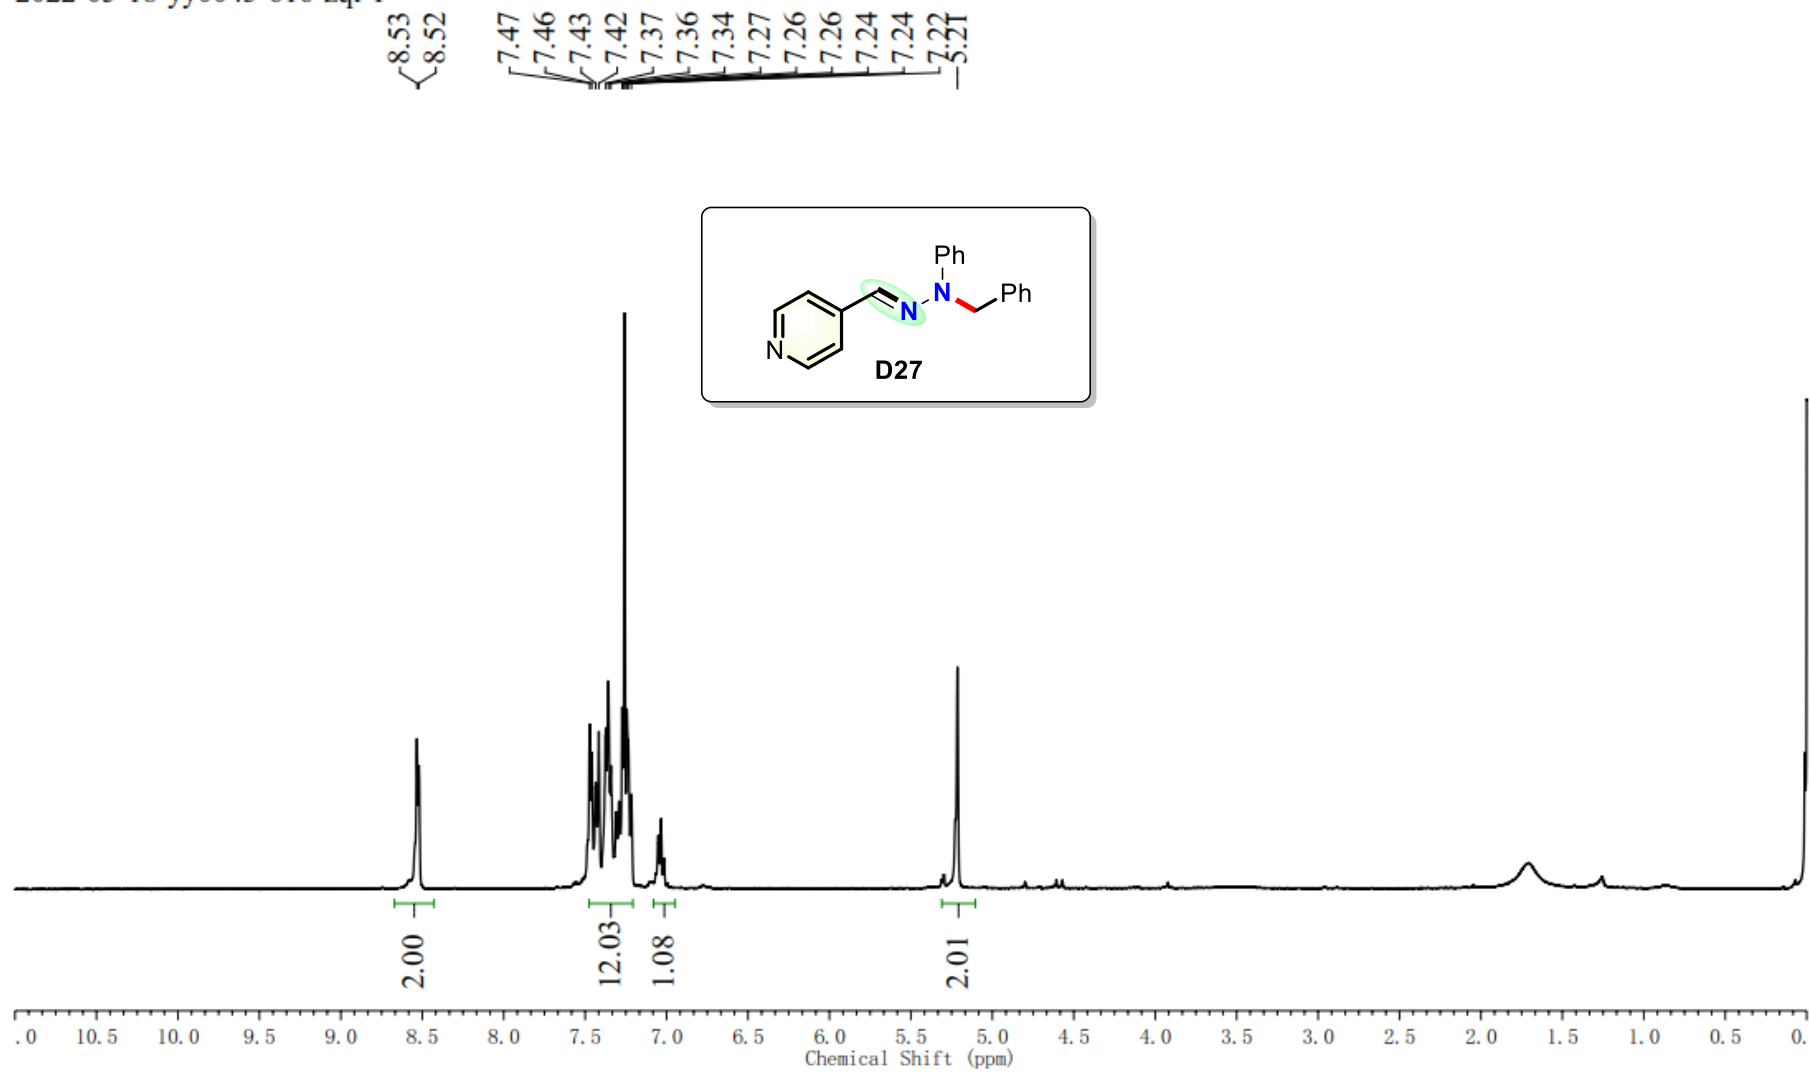

2022-05-25-yy0008-616-zql-18-1

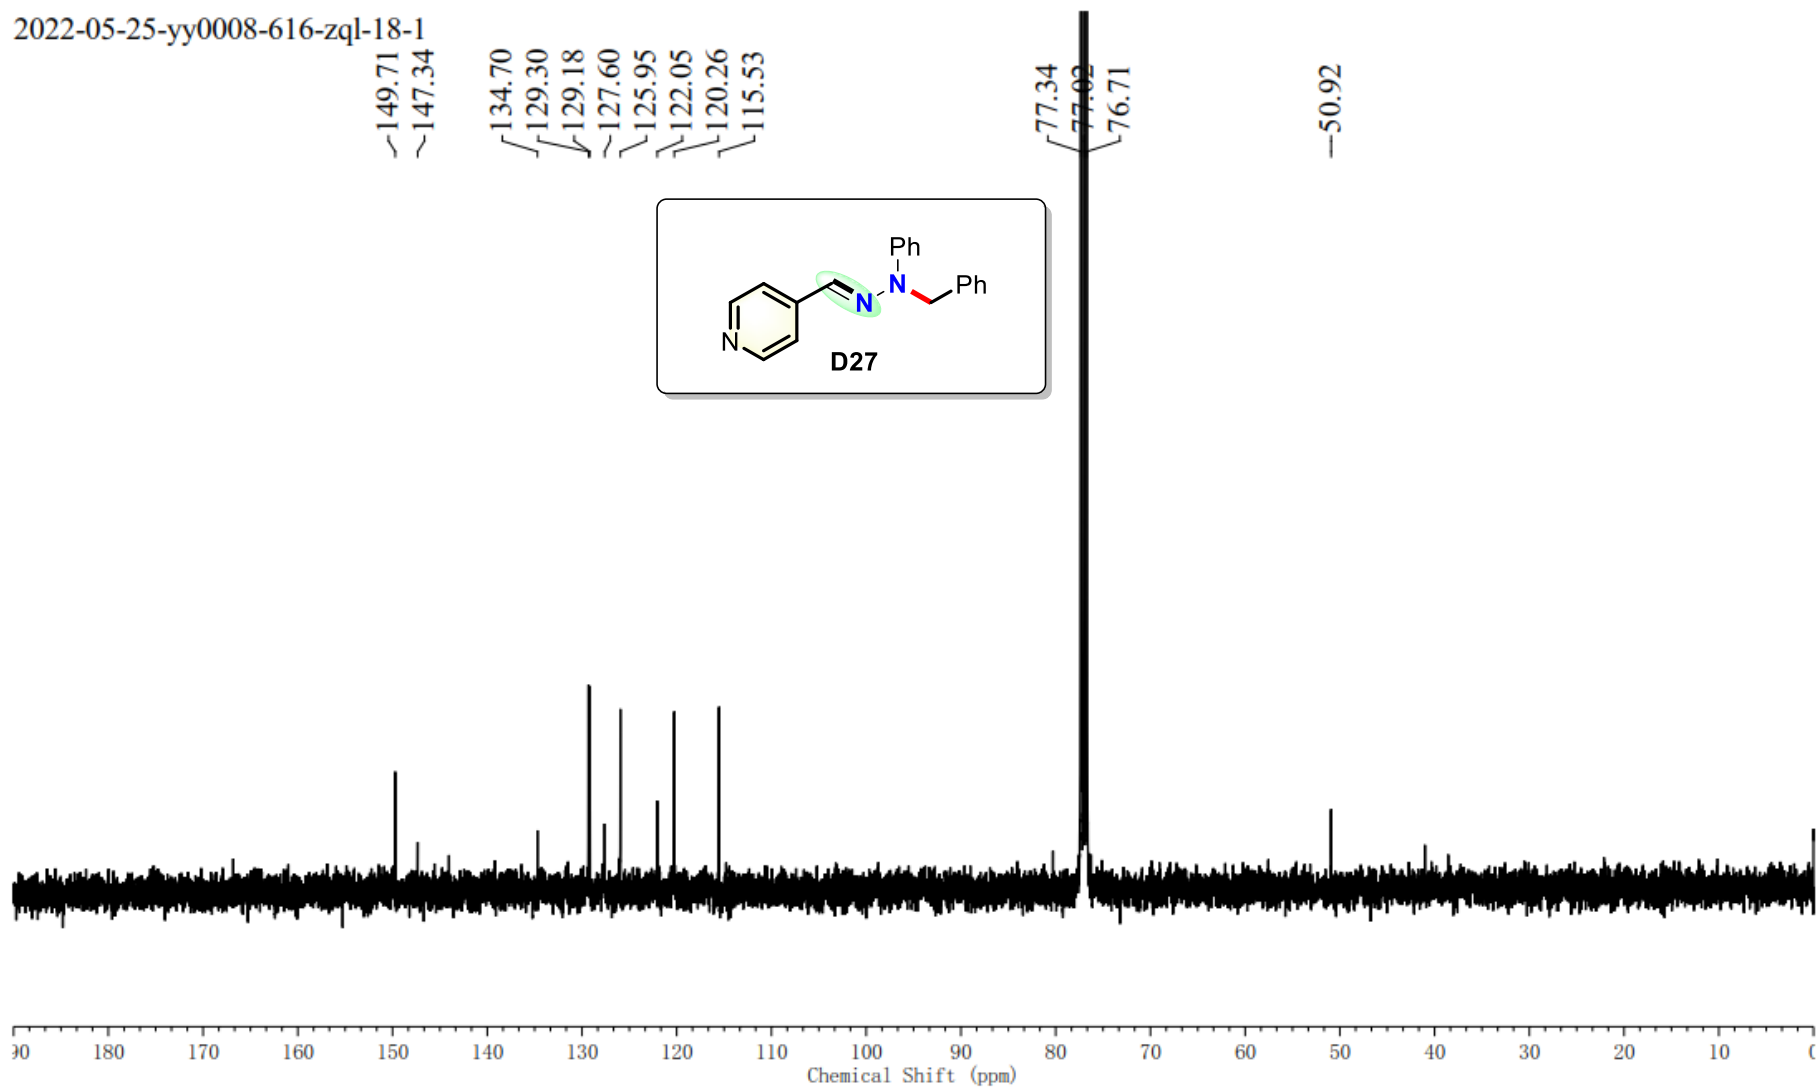

2022-05-20-yy0030-616-zql-3

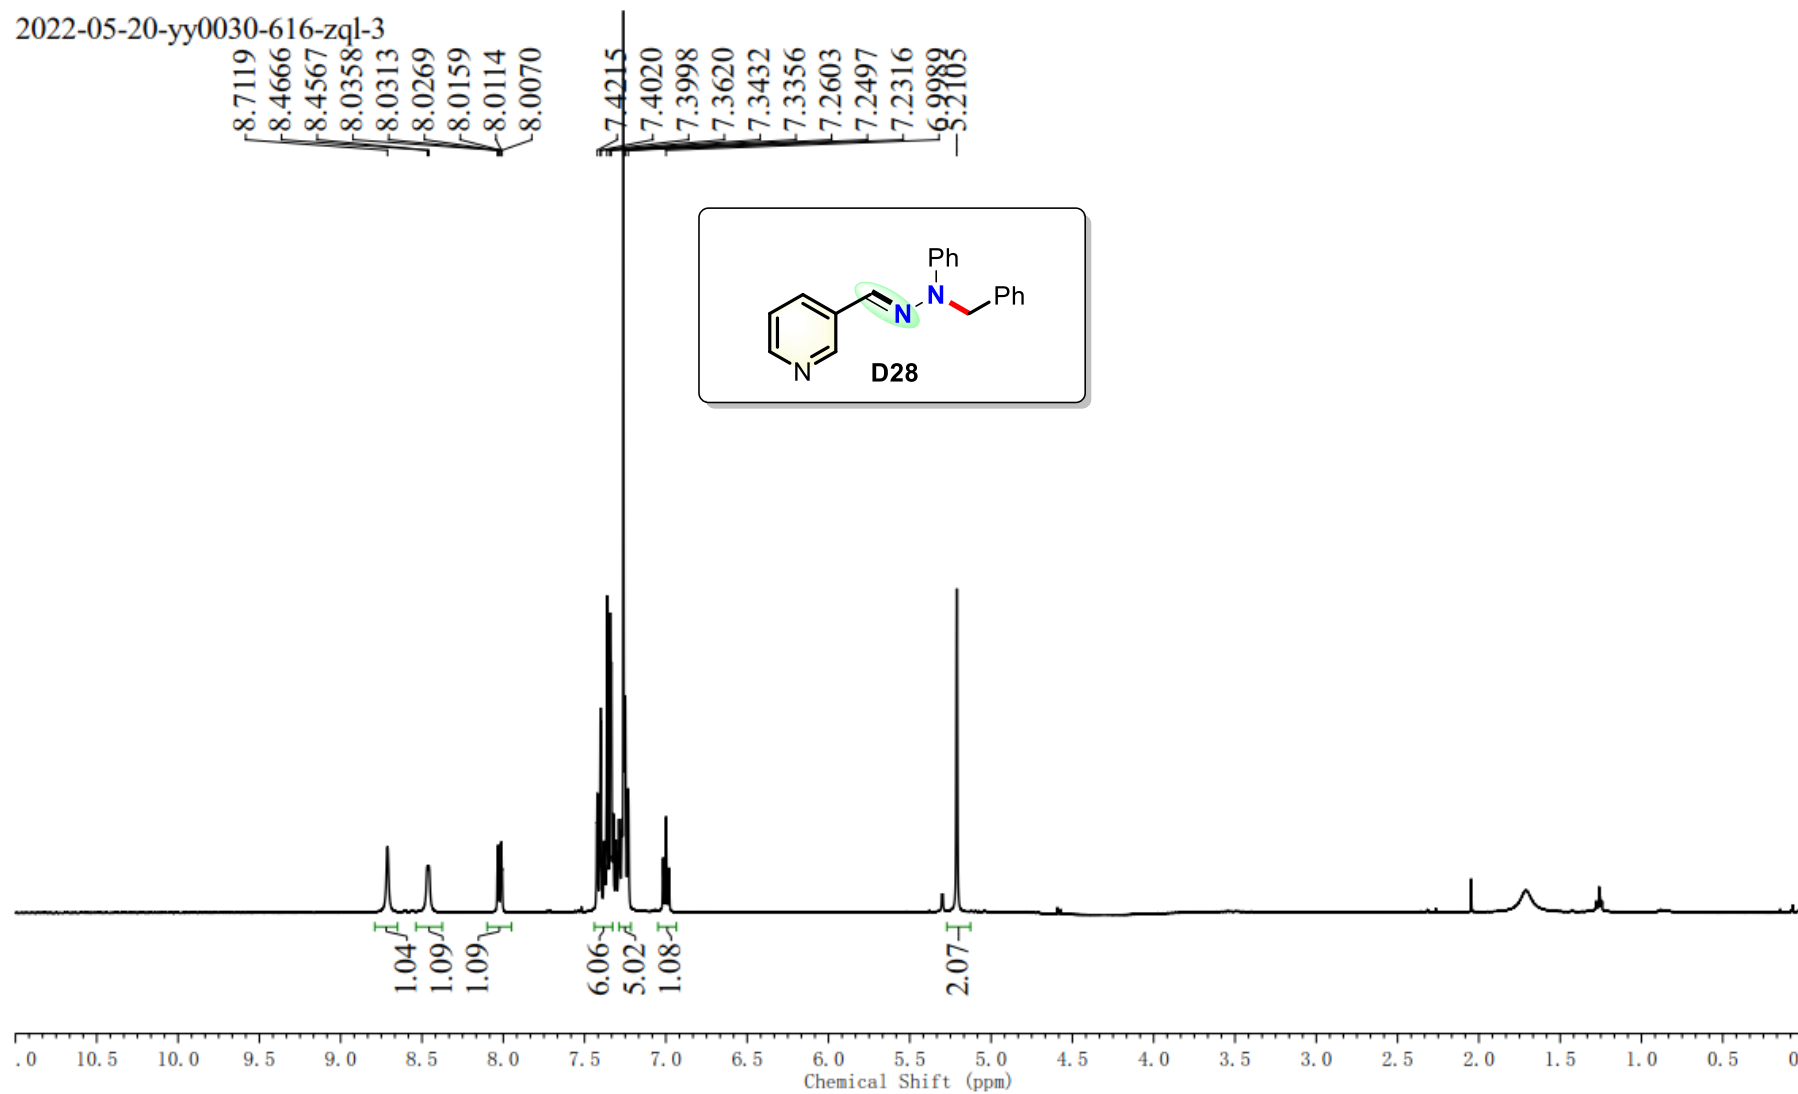

2022-05-25-yy0008-616-zql-19-3

148.49  
148.12  
147.57  
135.10  
132.44  
129.26  
129.14  
128.76  
127.51  
125.98  
123.55  
121.42  
115.10

77.34  
77.03  
76.71

—50.66

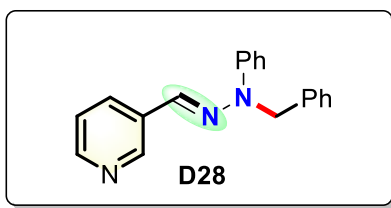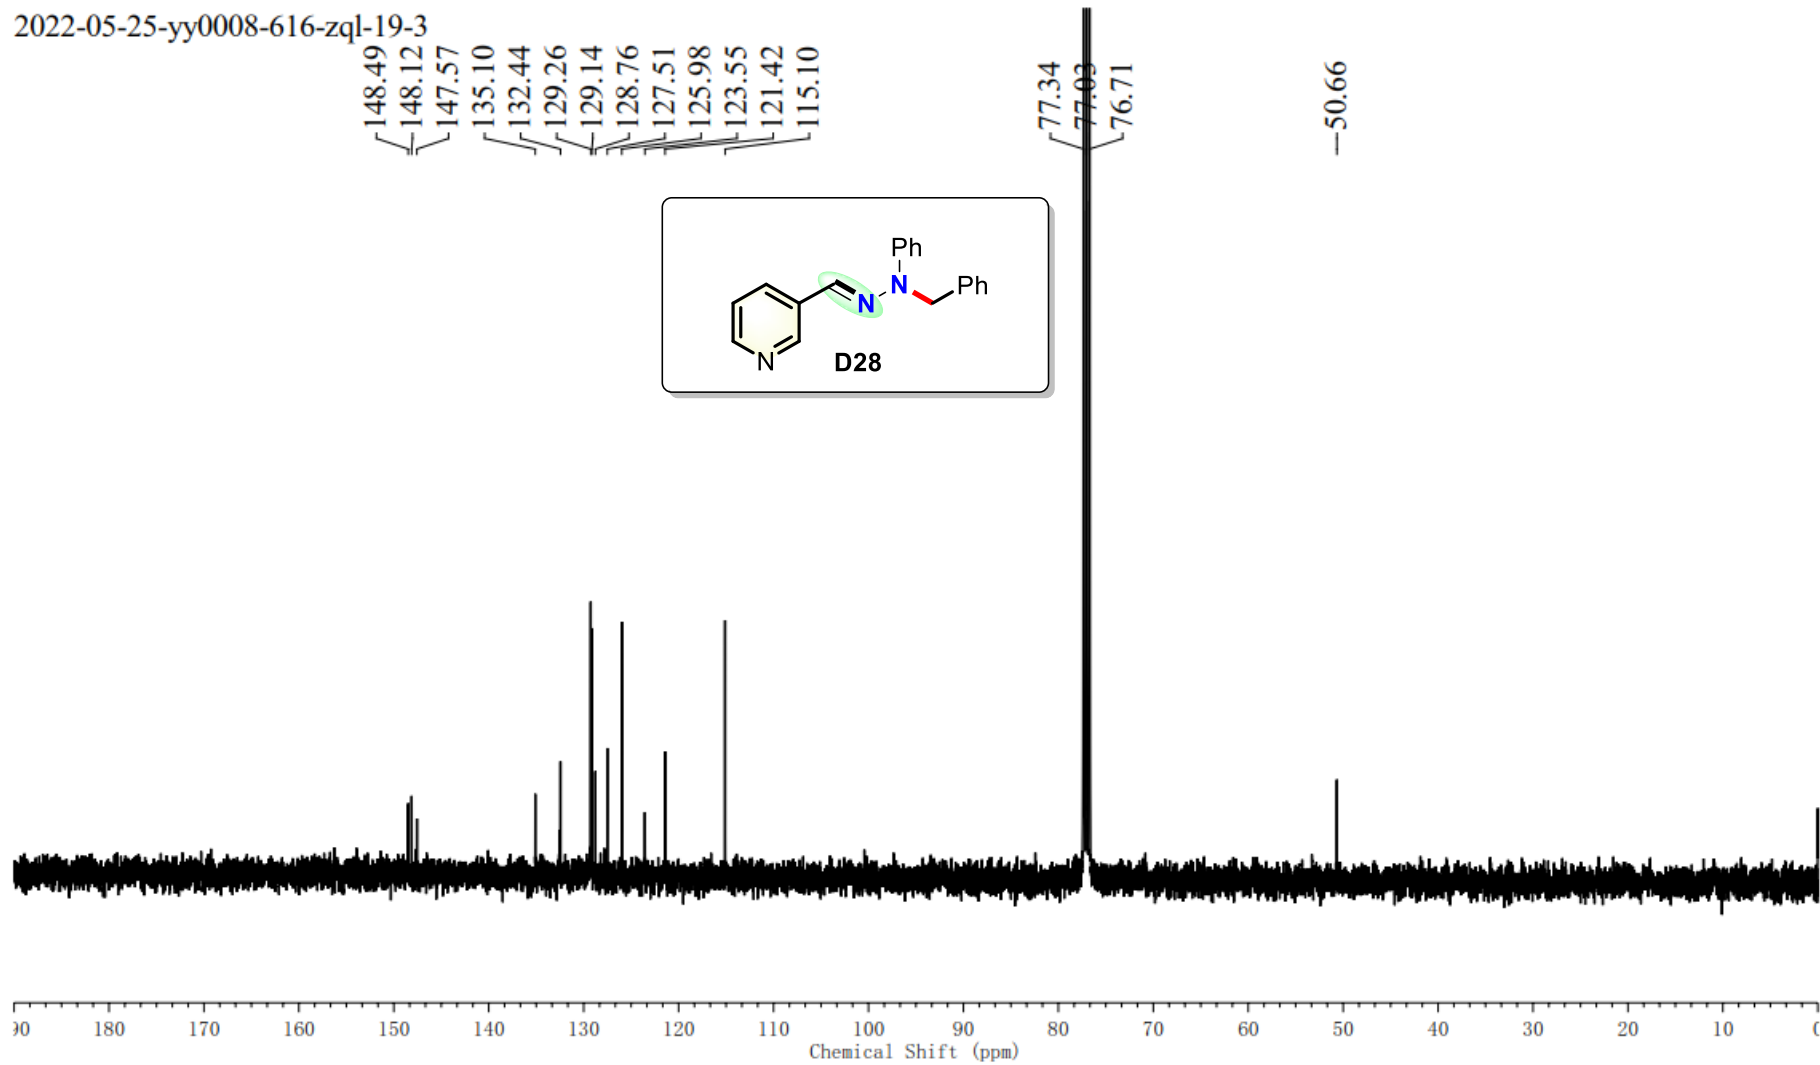

2022-05-20-yy0030-616-zql-1

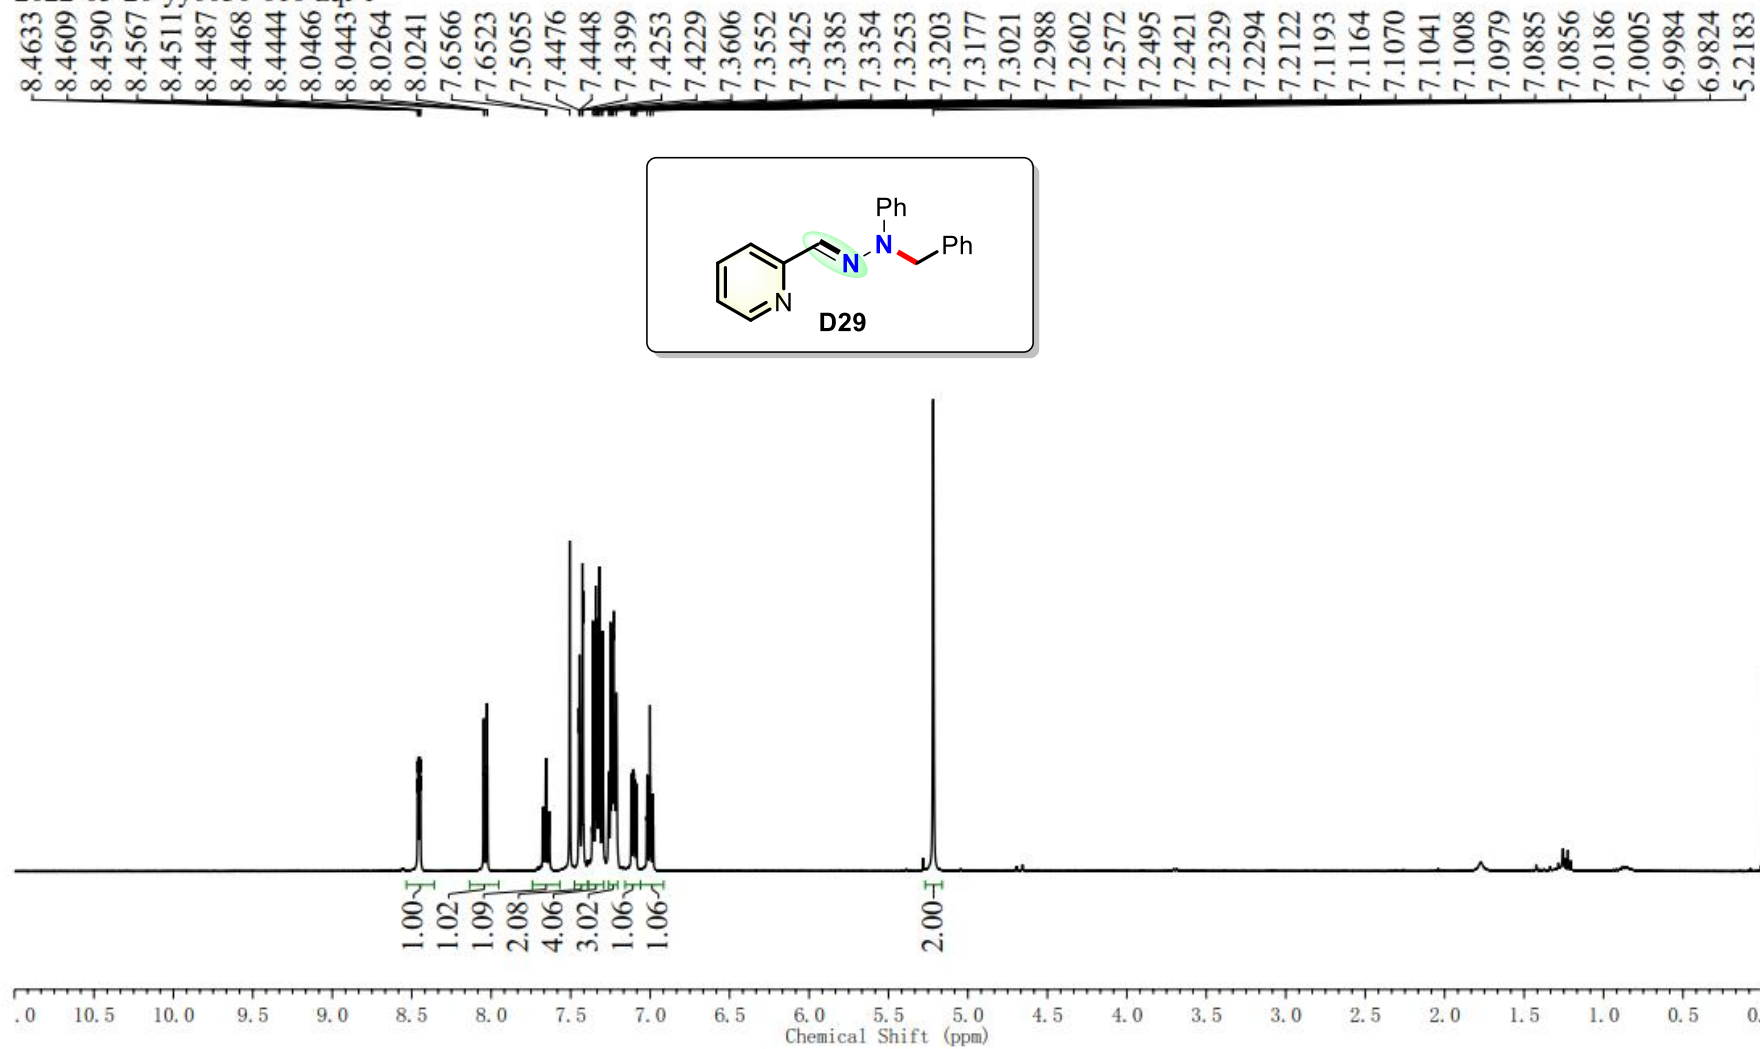

2022-05-25-yy0008-616-zql-19-1

155.72  
149.00  
147.59  
136.17  
134.92  
133.25  
129.24  
129.05  
127.42  
126.05  
122.10  
121.51  
119.31  
115.27

77.38  
77.06  
76.74

50.80

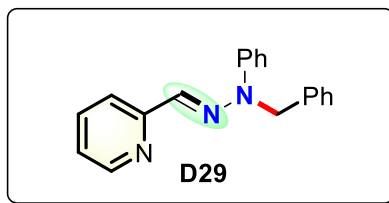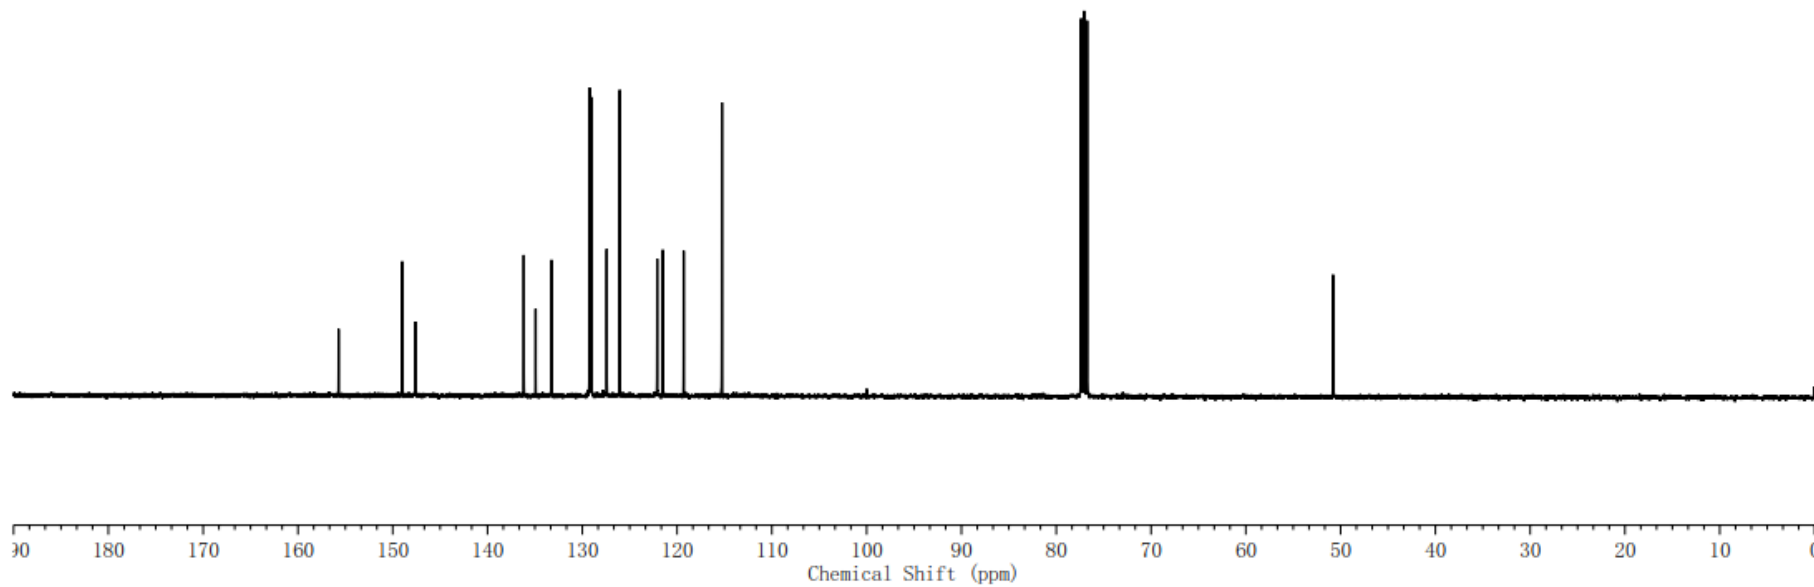



2022-05-14 YY0028-616-ZQL-6

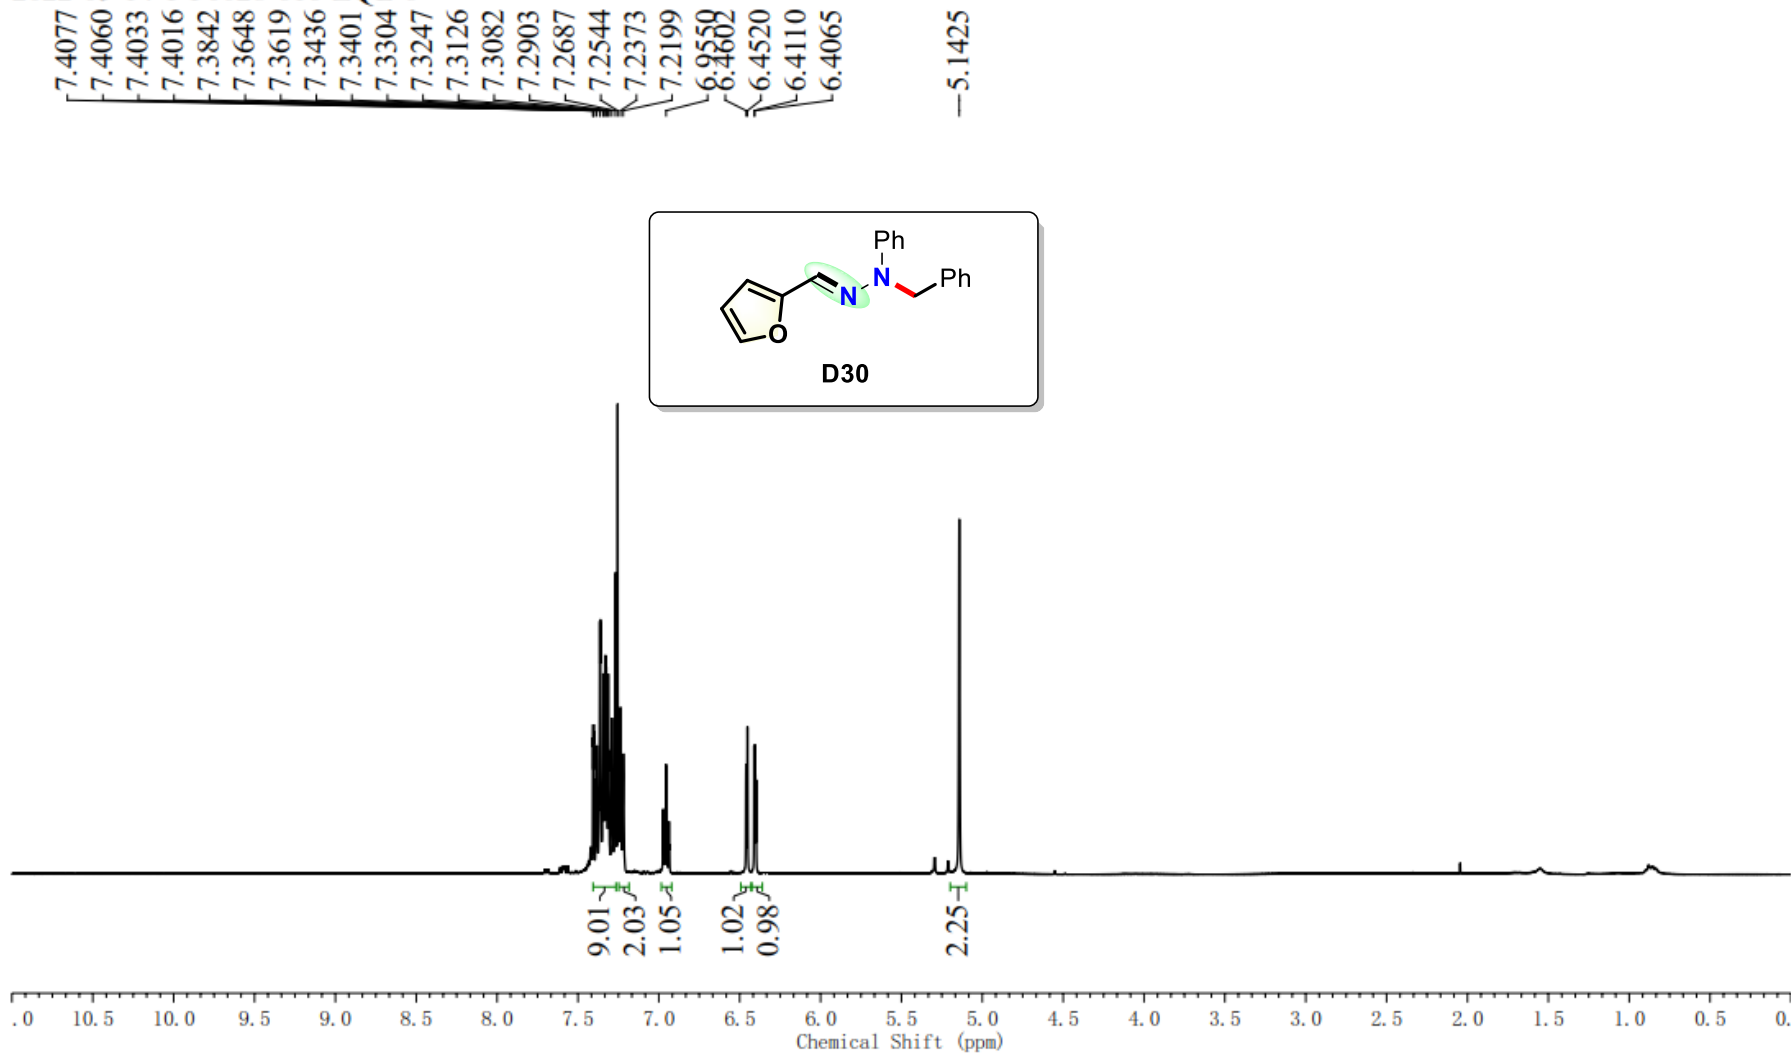

2022-05-16-yy0016-zql-6

151.99  
147.61  
142.33  
135.31  
129.18  
129.06  
127.40  
126.02  
123.42  
121.04  
115.06  
111.49  
108.03

77.35  
77.03  
76.72

50.72

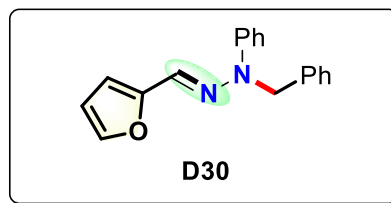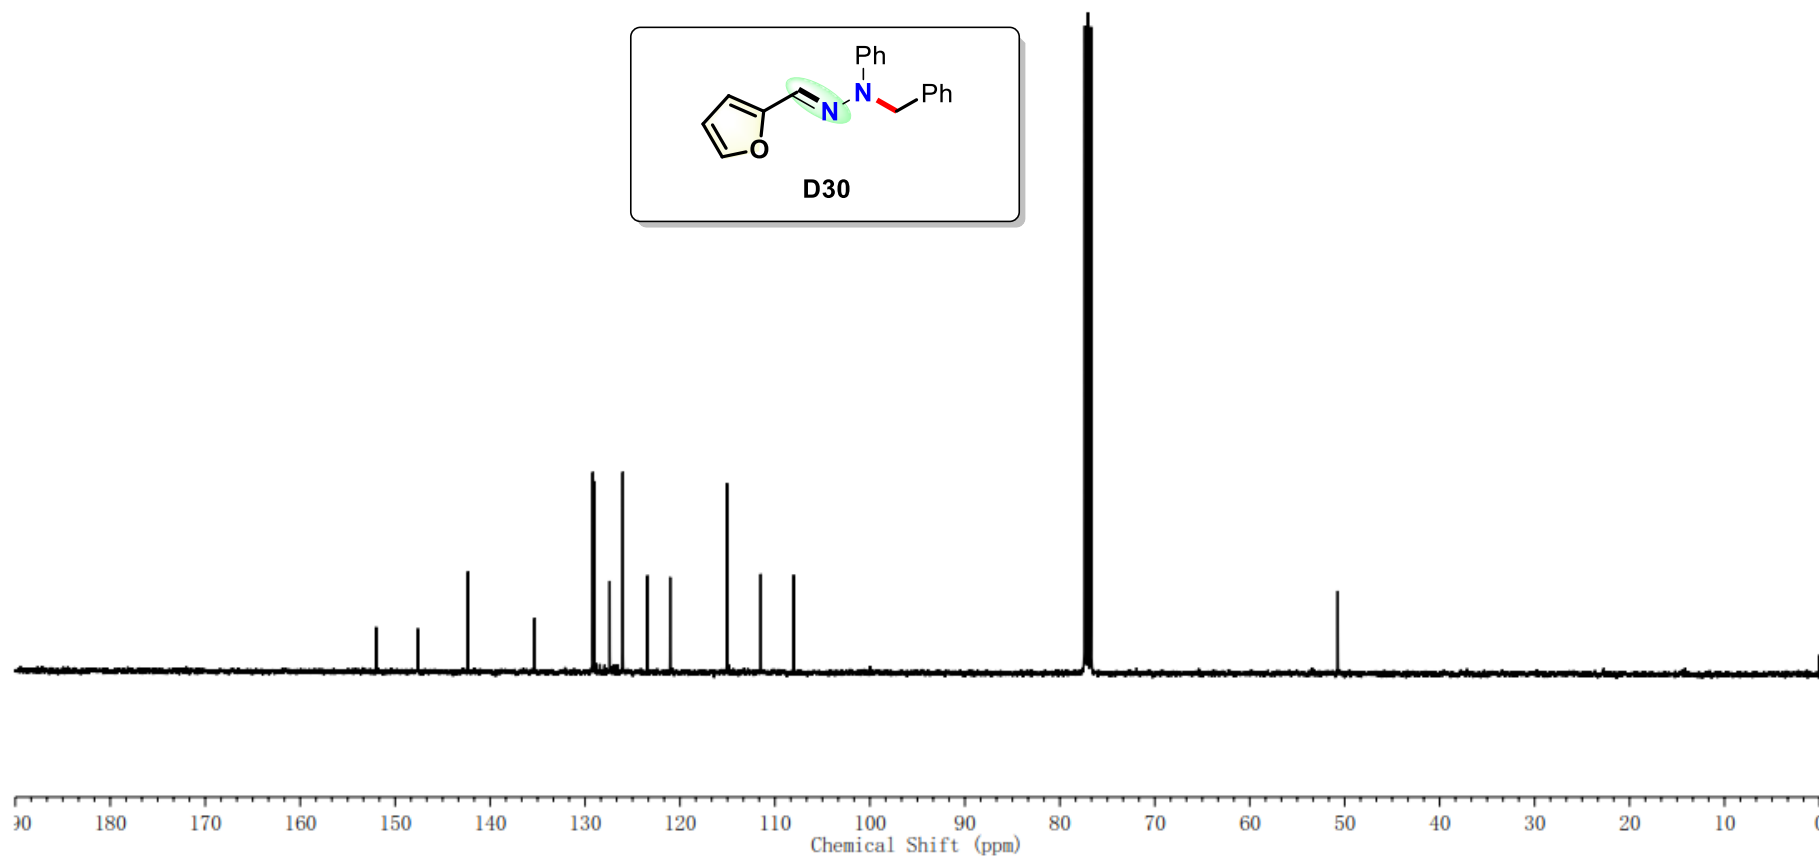

2022-05-18-yy0043-616-zql-3

7.5485  
7.3695  
7.3486  
7.3302  
7.3129  
7.2913  
7.2746  
7.2550  
7.2480  
7.2294  
7.1934  
7.1855  
7.1775  
6.9645  
6.9528  
6.9451  
6.9300  
— 5.1474

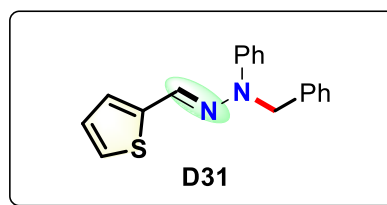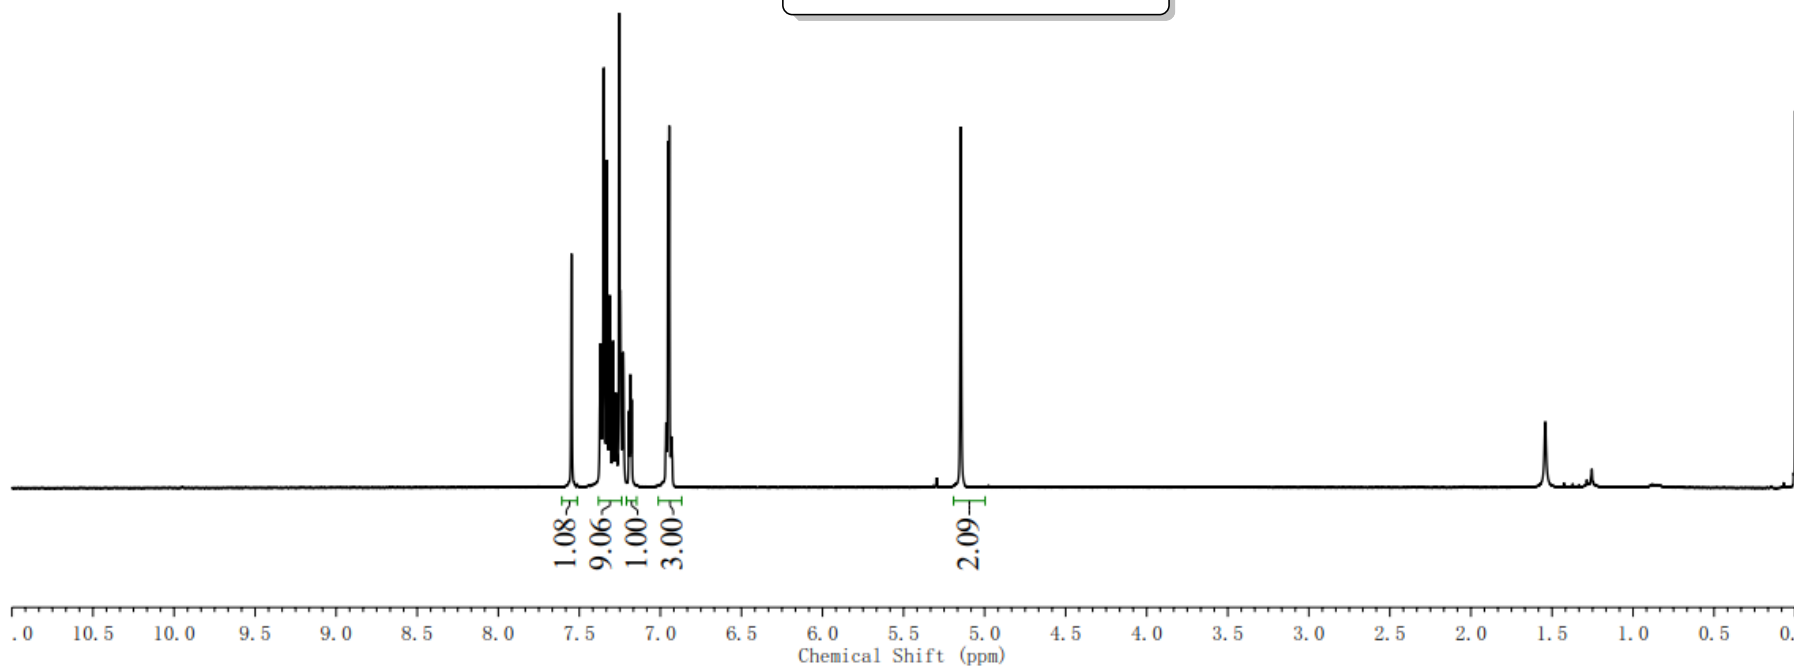

2022-05-25-yy0008-616-zql-18-3

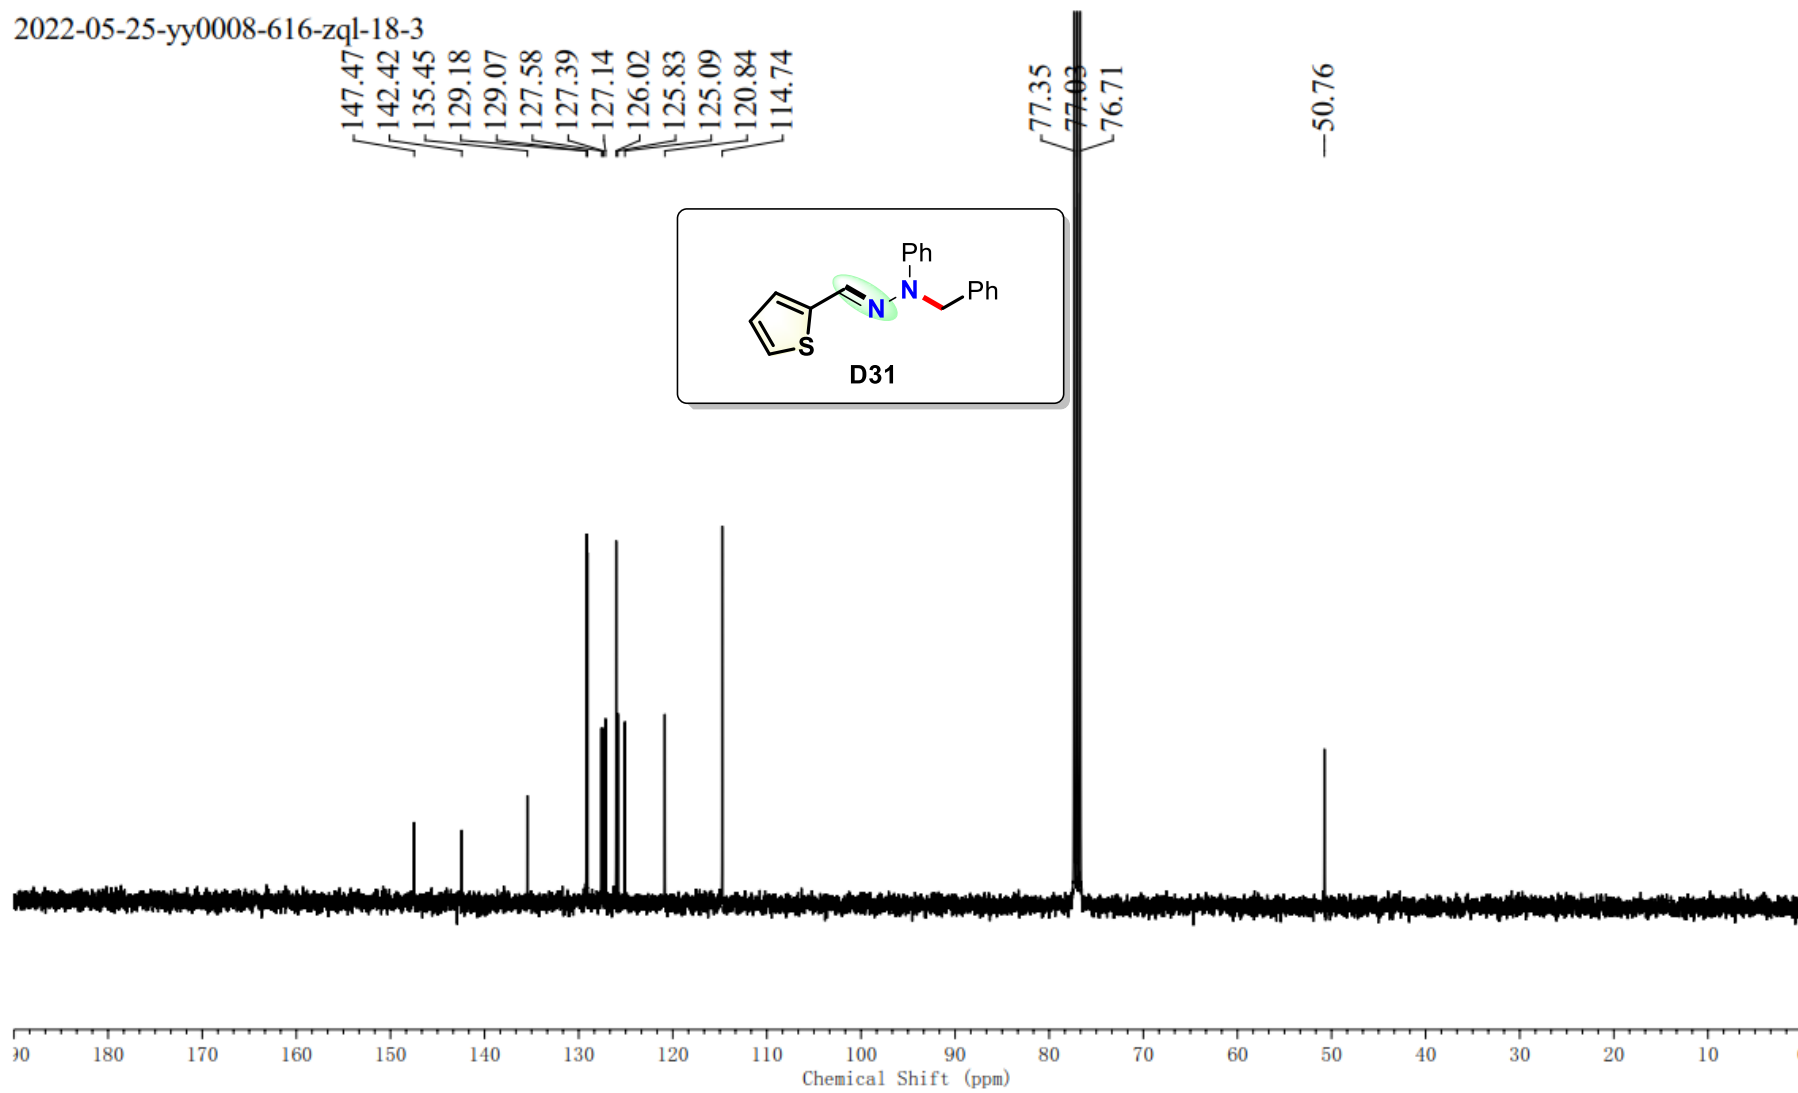

2022-05-20-yy0025-616-zql-1

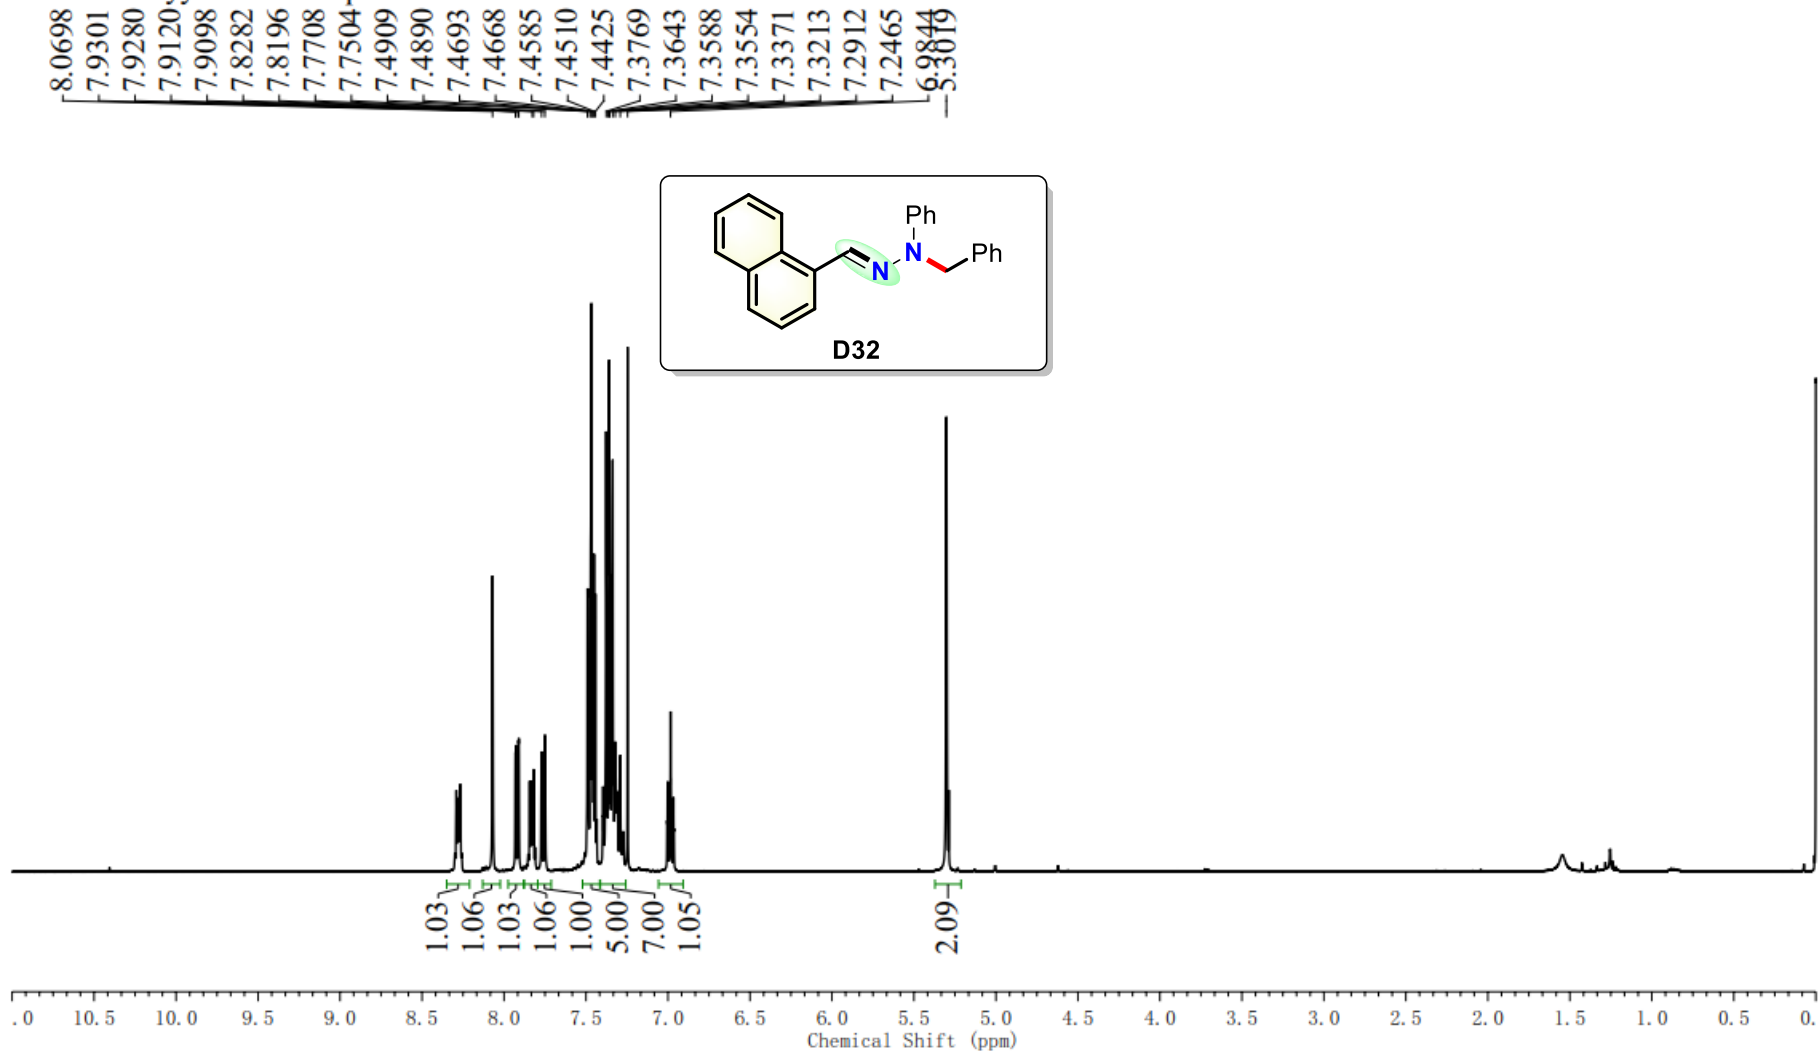

2022-05-23-yy0008-616-zql-1

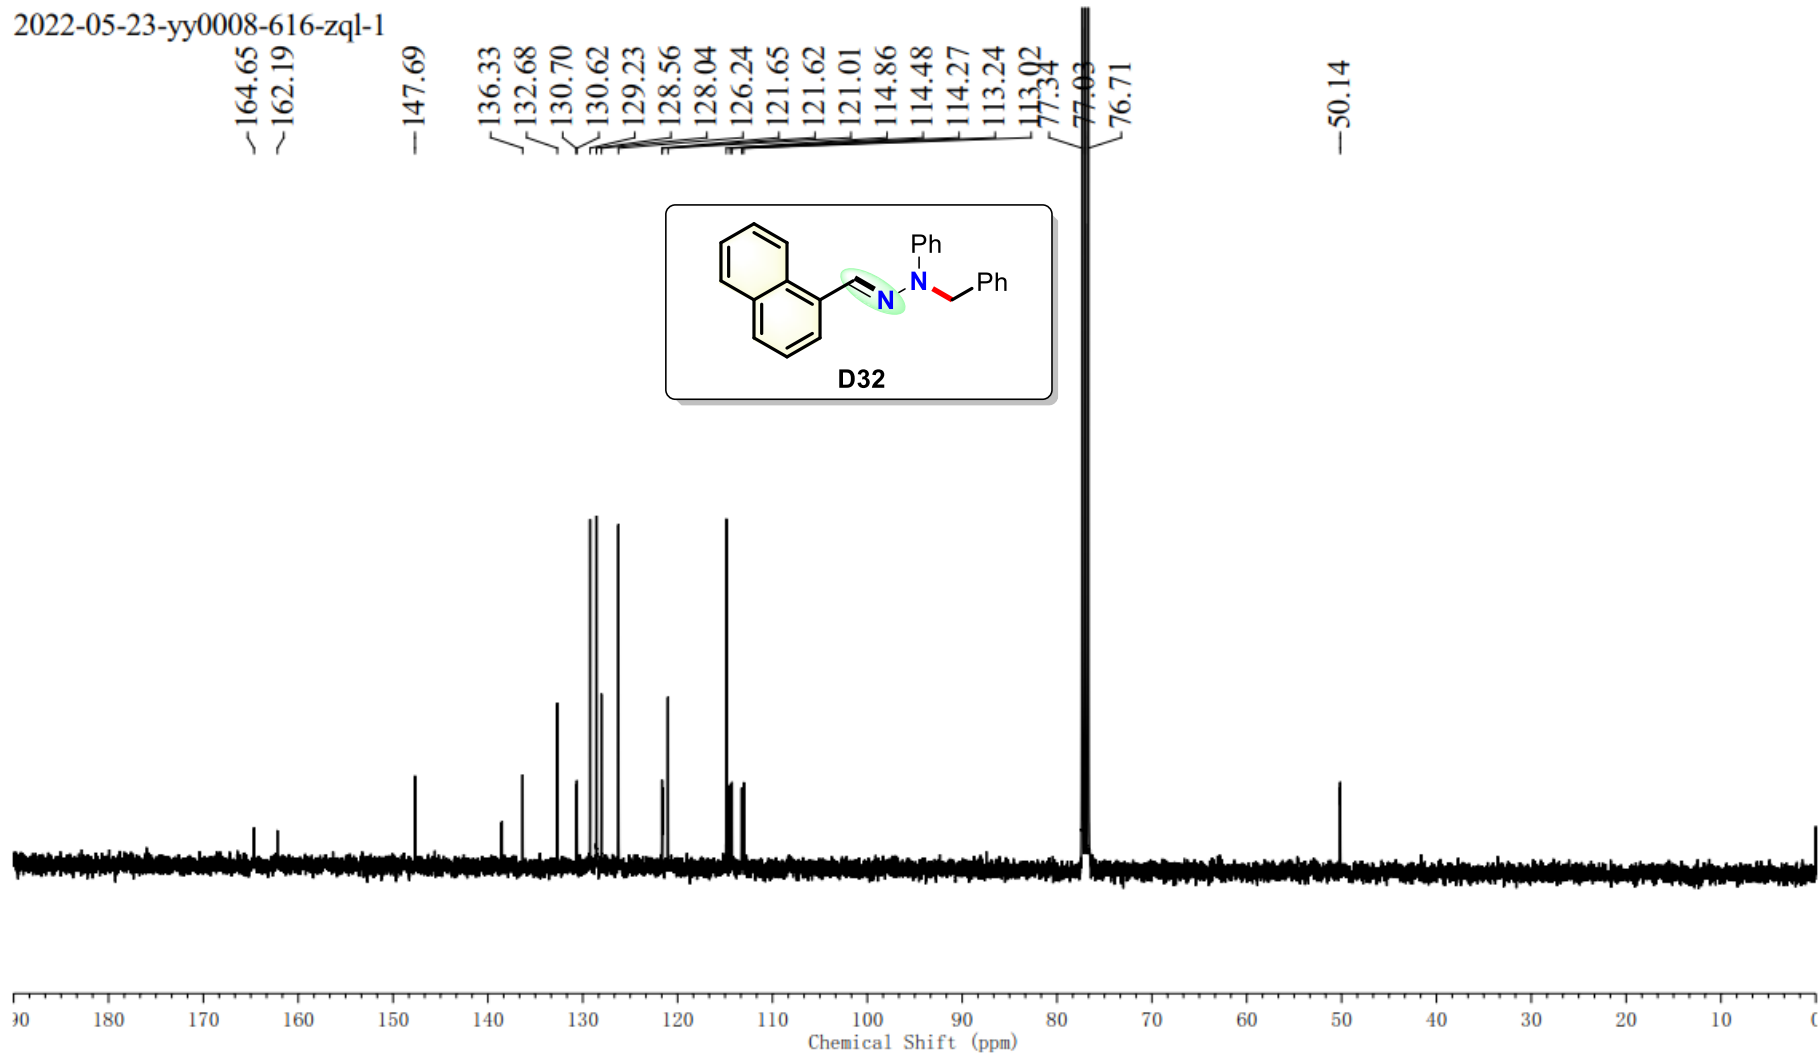

2022-05-18-yy0043-616-zq1-2

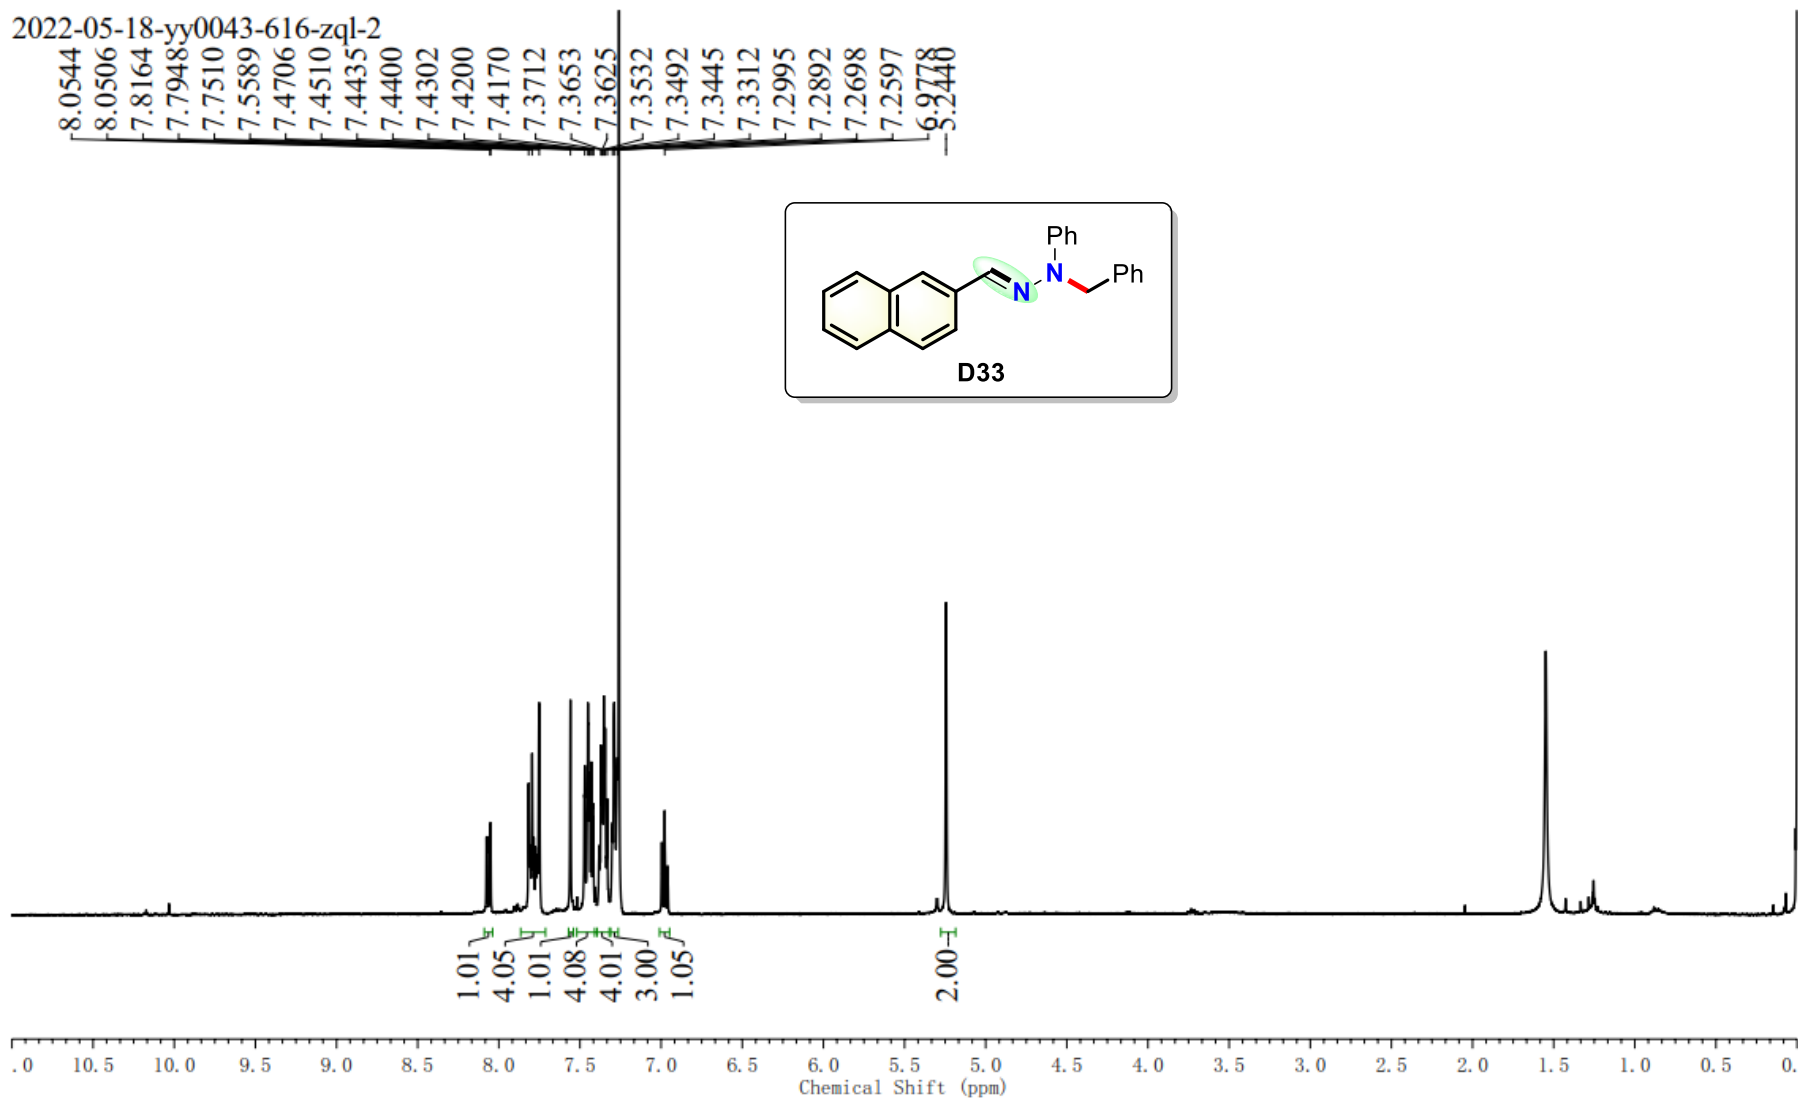

2022-06-22 yy0024 616-zql-1

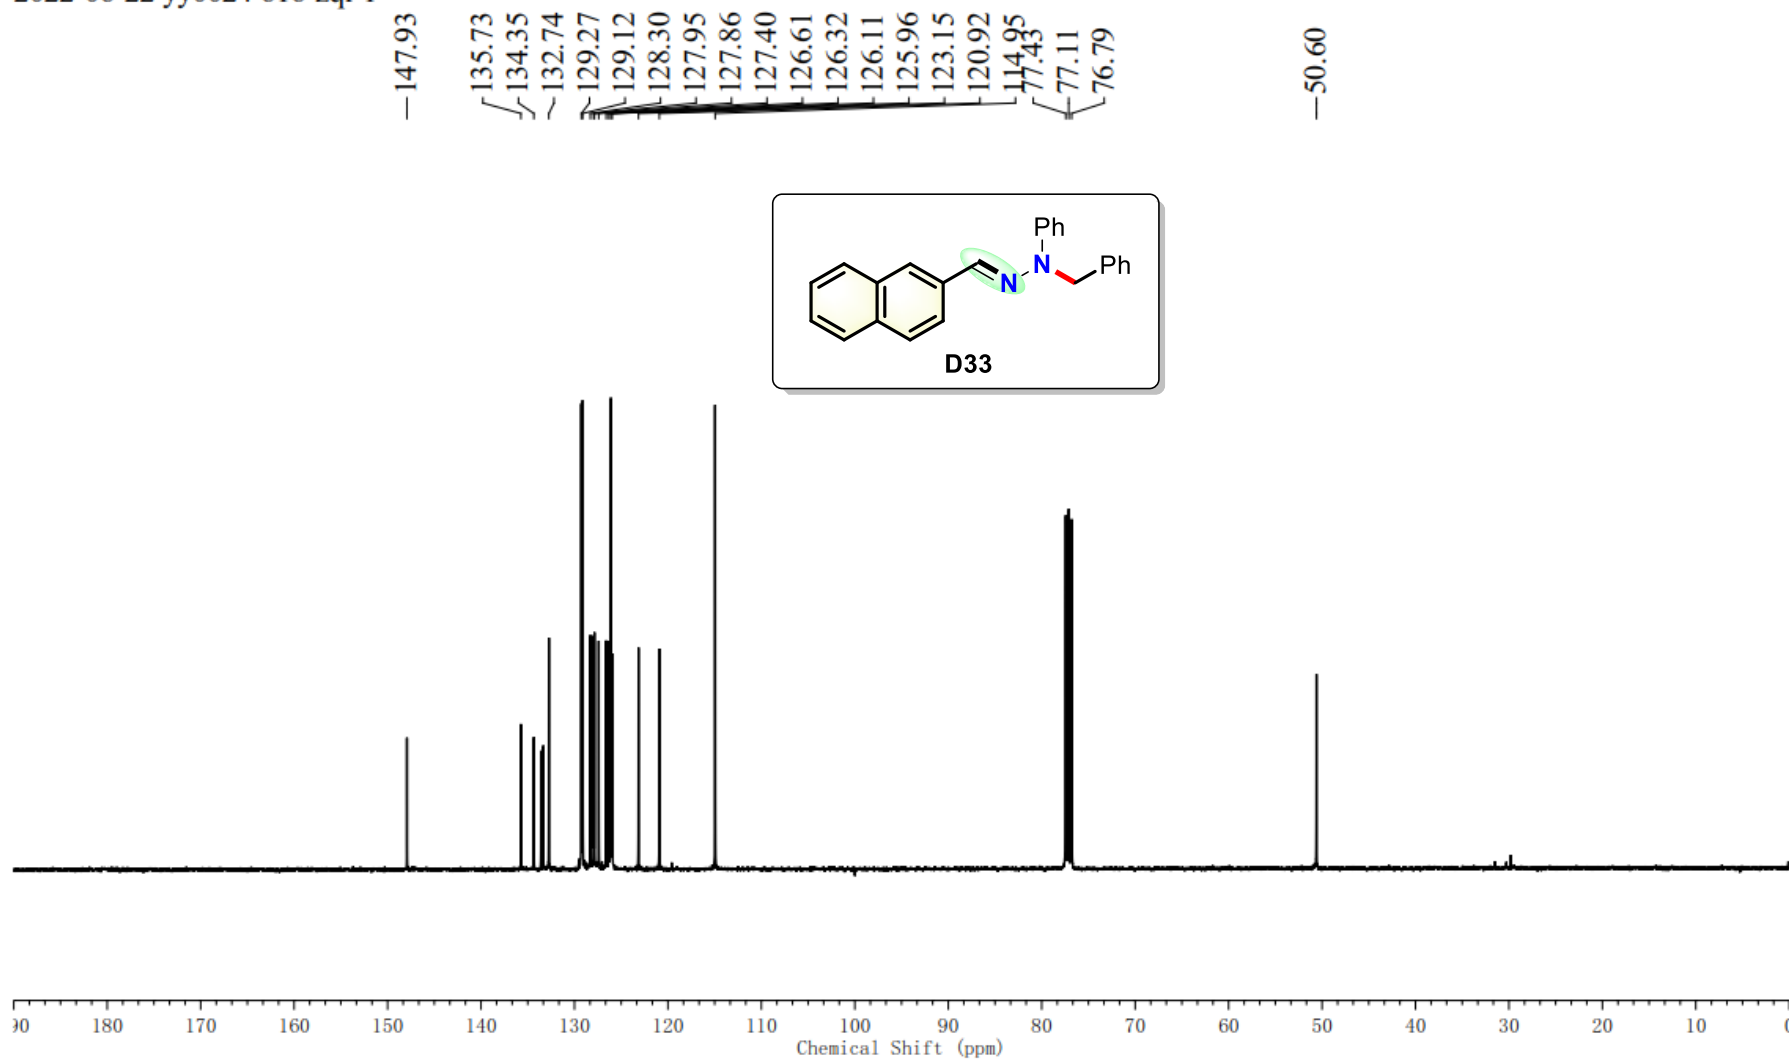



2022-05-17-yy0025-616-zql-4

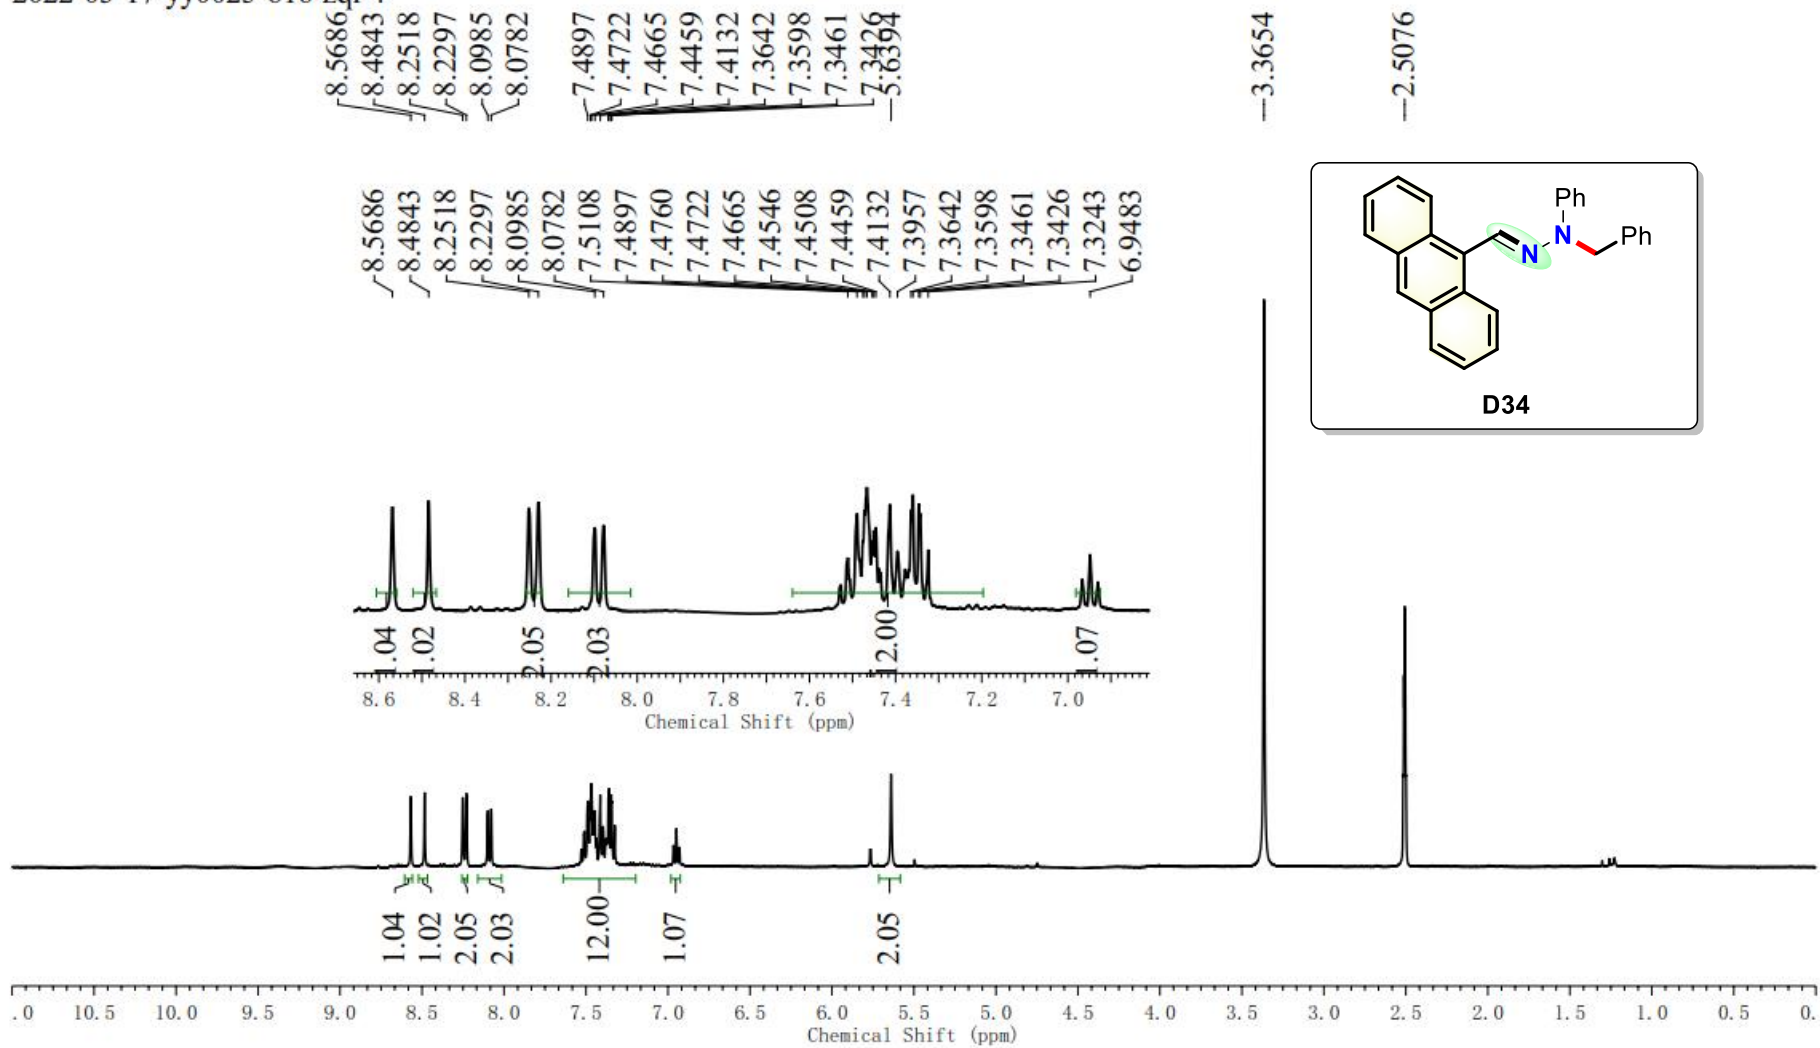

2022-05-18-yy0043-616-zql-4

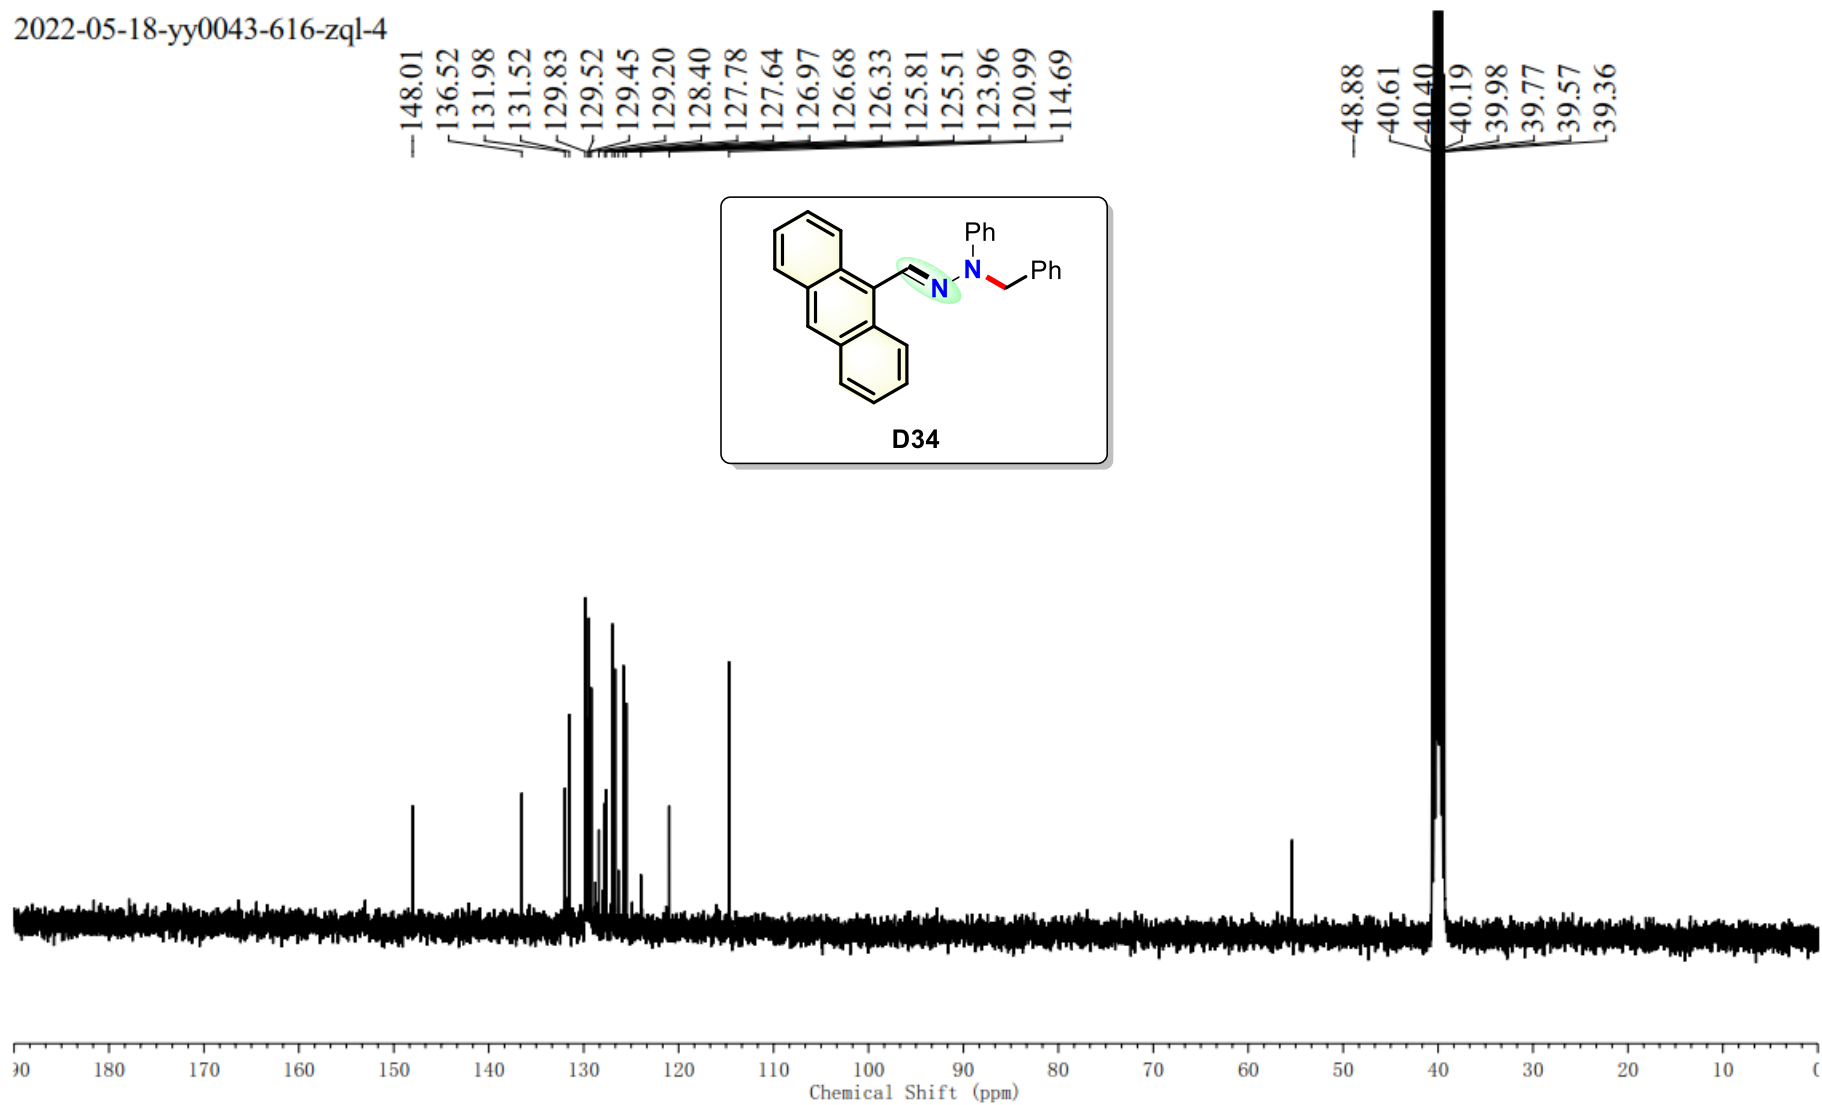

S210

2022-6-7 YY0014-616-ZQL-1

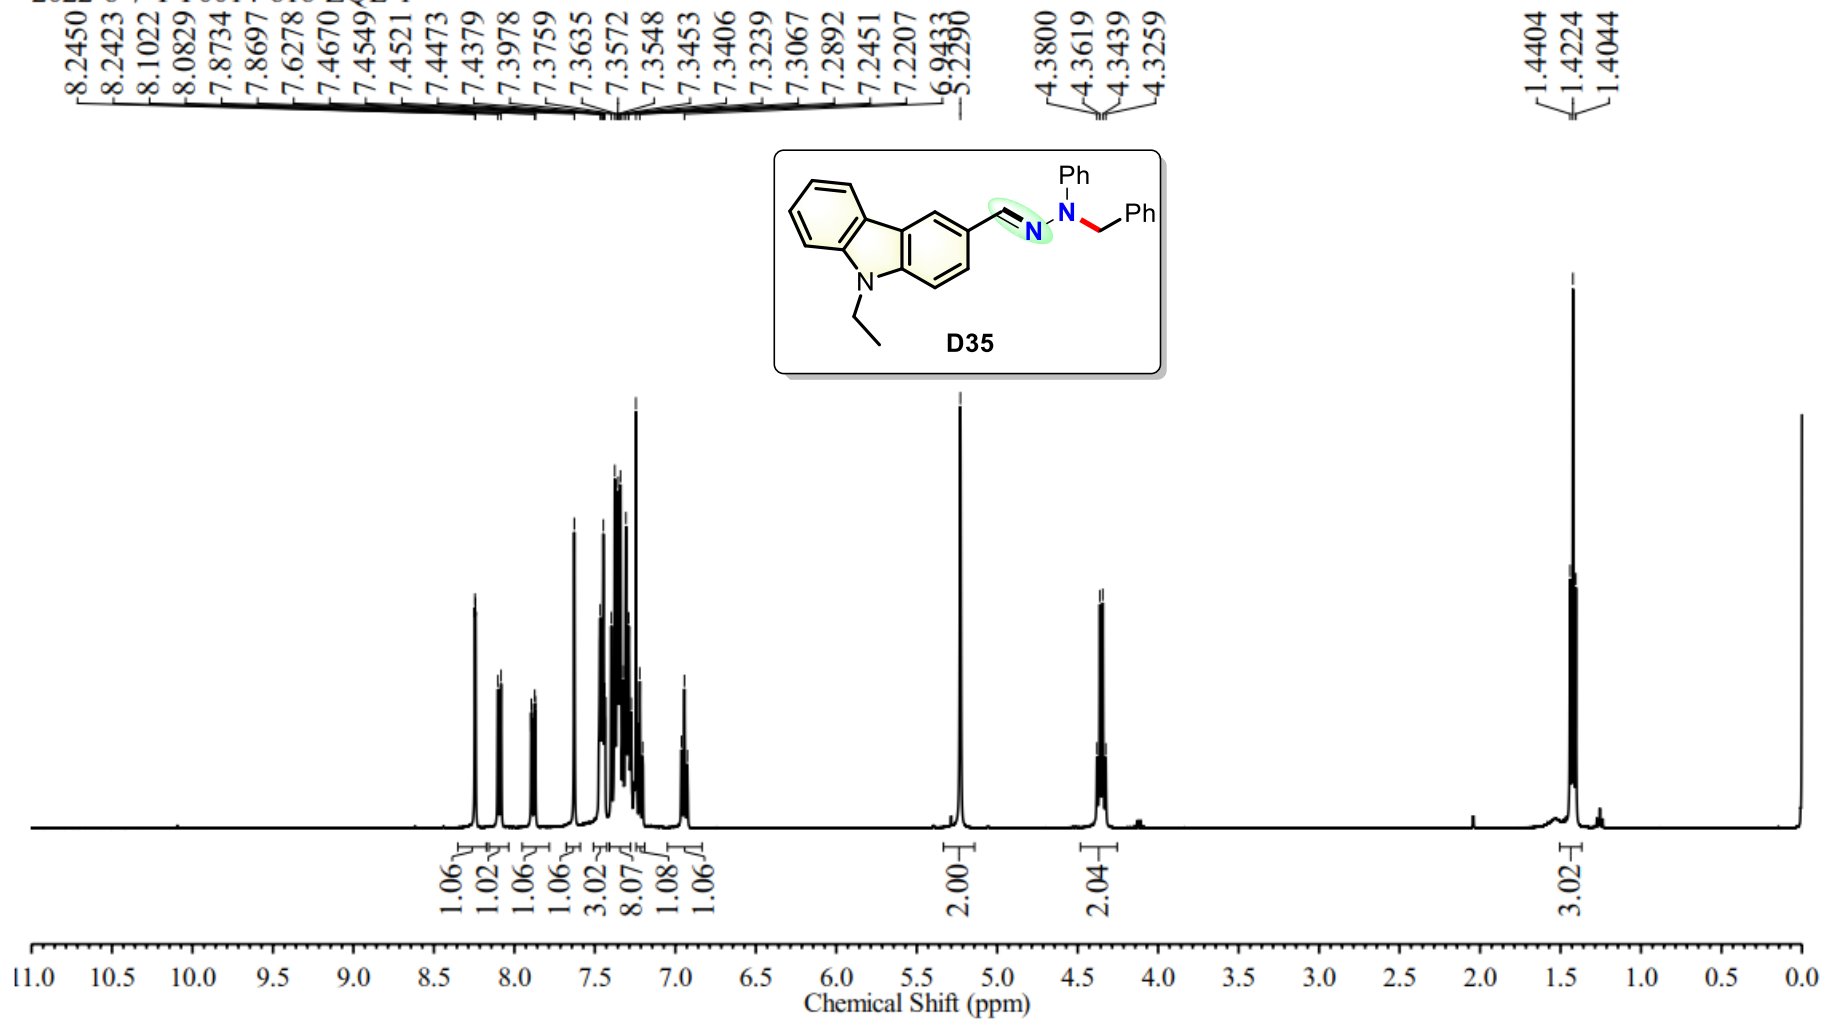

2022-6-11 yy0002-616-zql-1

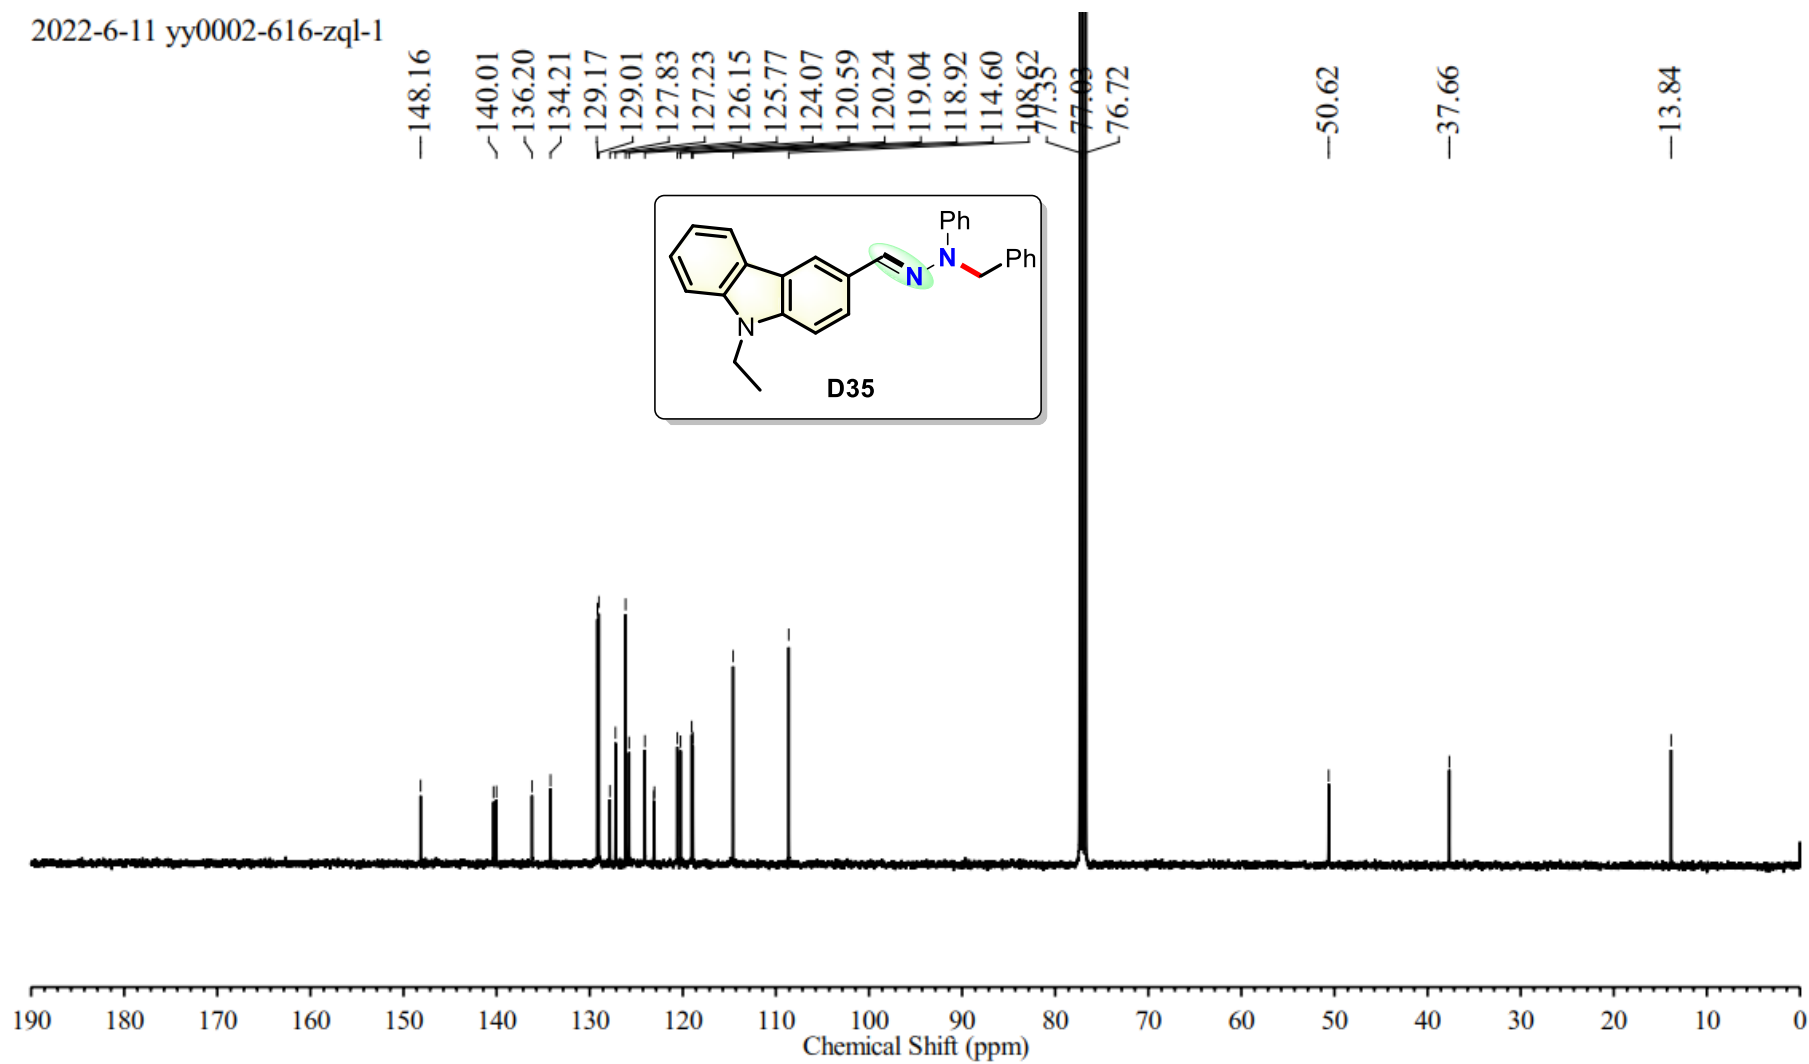

2022-05-20-yy0025-616-zql-2

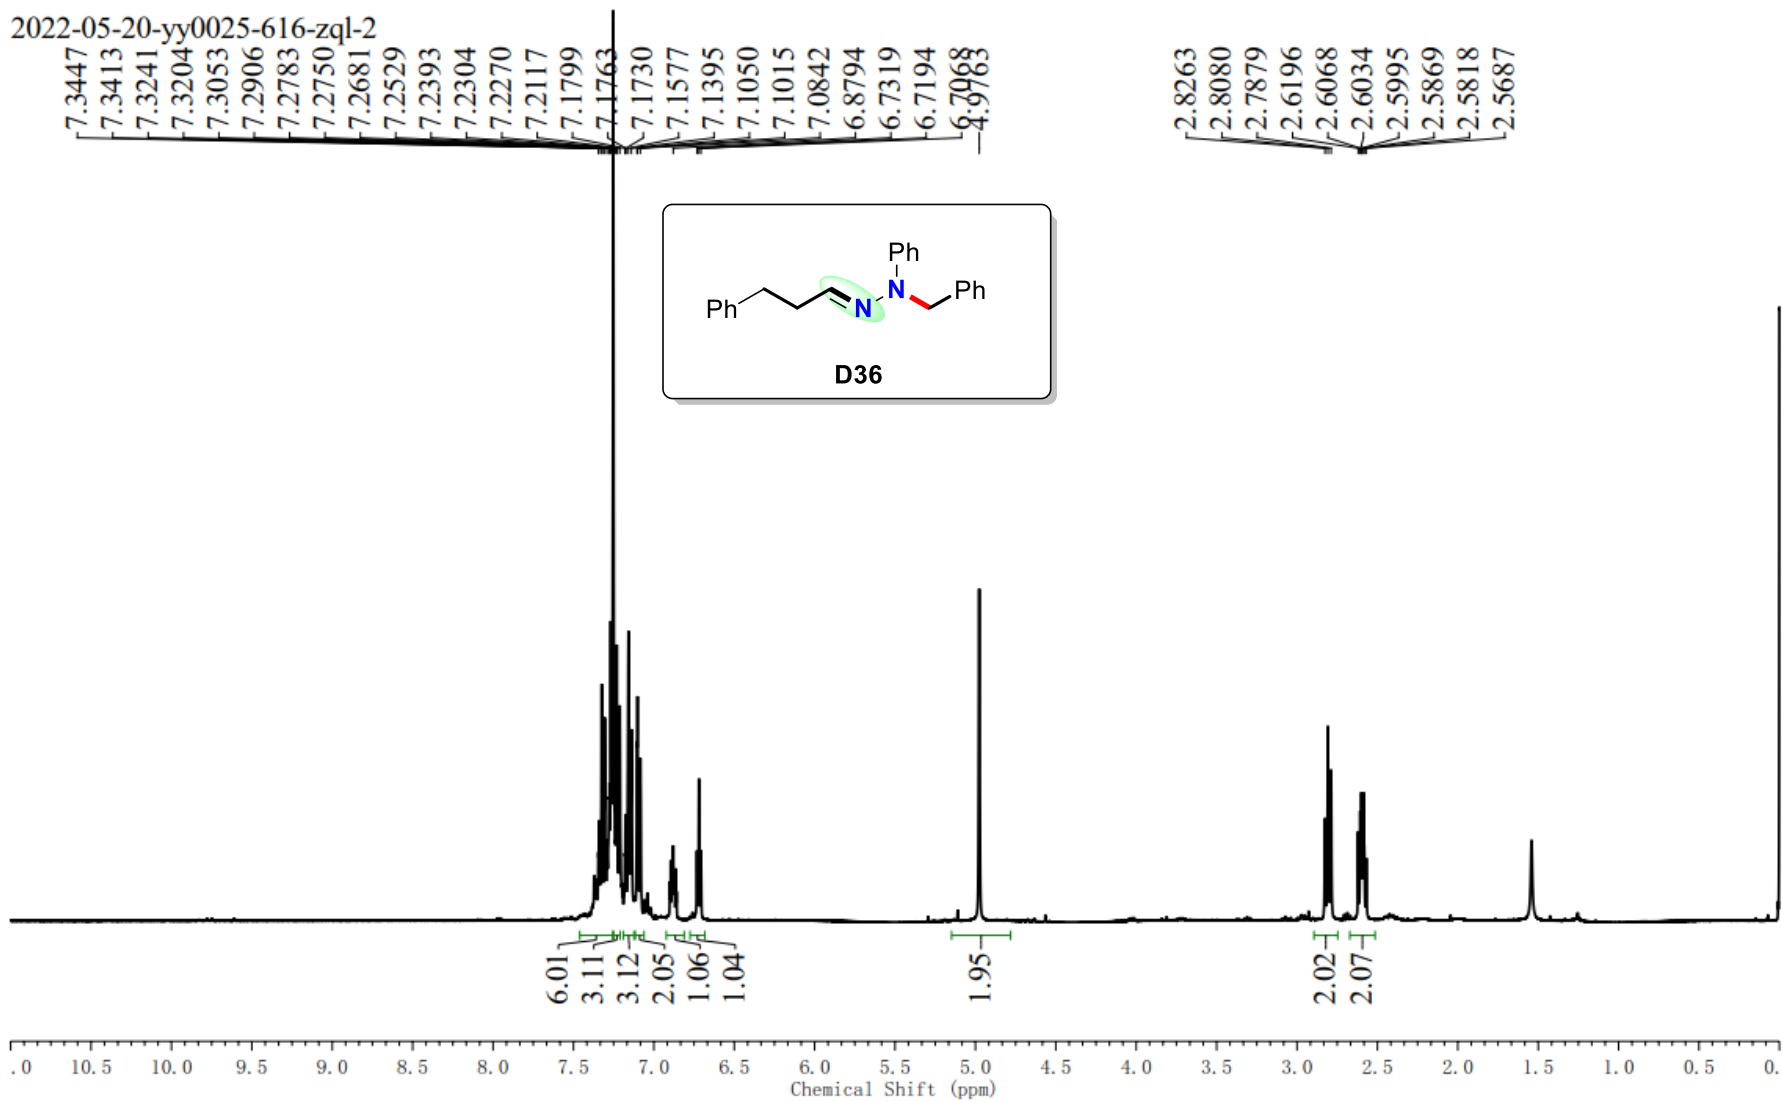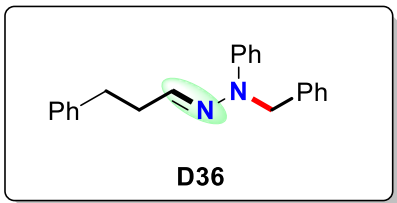

2022-06-22 yy0024 616-zql-2

148.22  
141.49  
136.19  
135.35  
129.12  
128.99  
128.90  
128.55  
128.51  
128.45  
128.36  
128.32  
127.12  
126.09  
125.87  
119.97  
114.25

77.38  
77.07  
76.75

50.47

34.74  
33.78

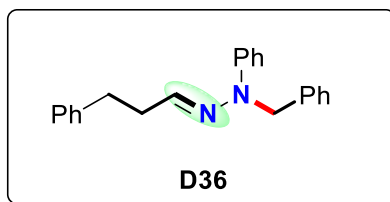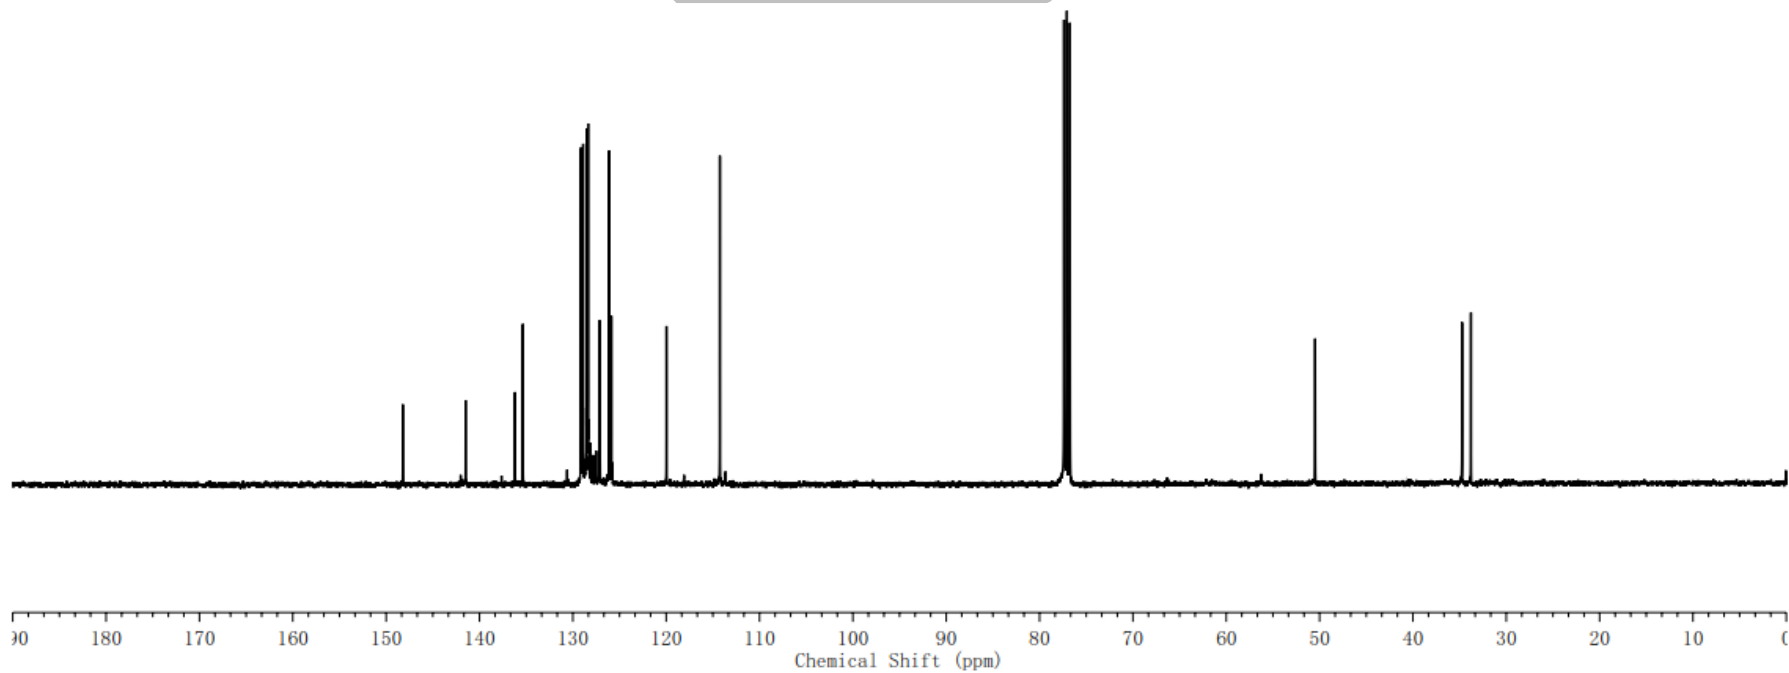

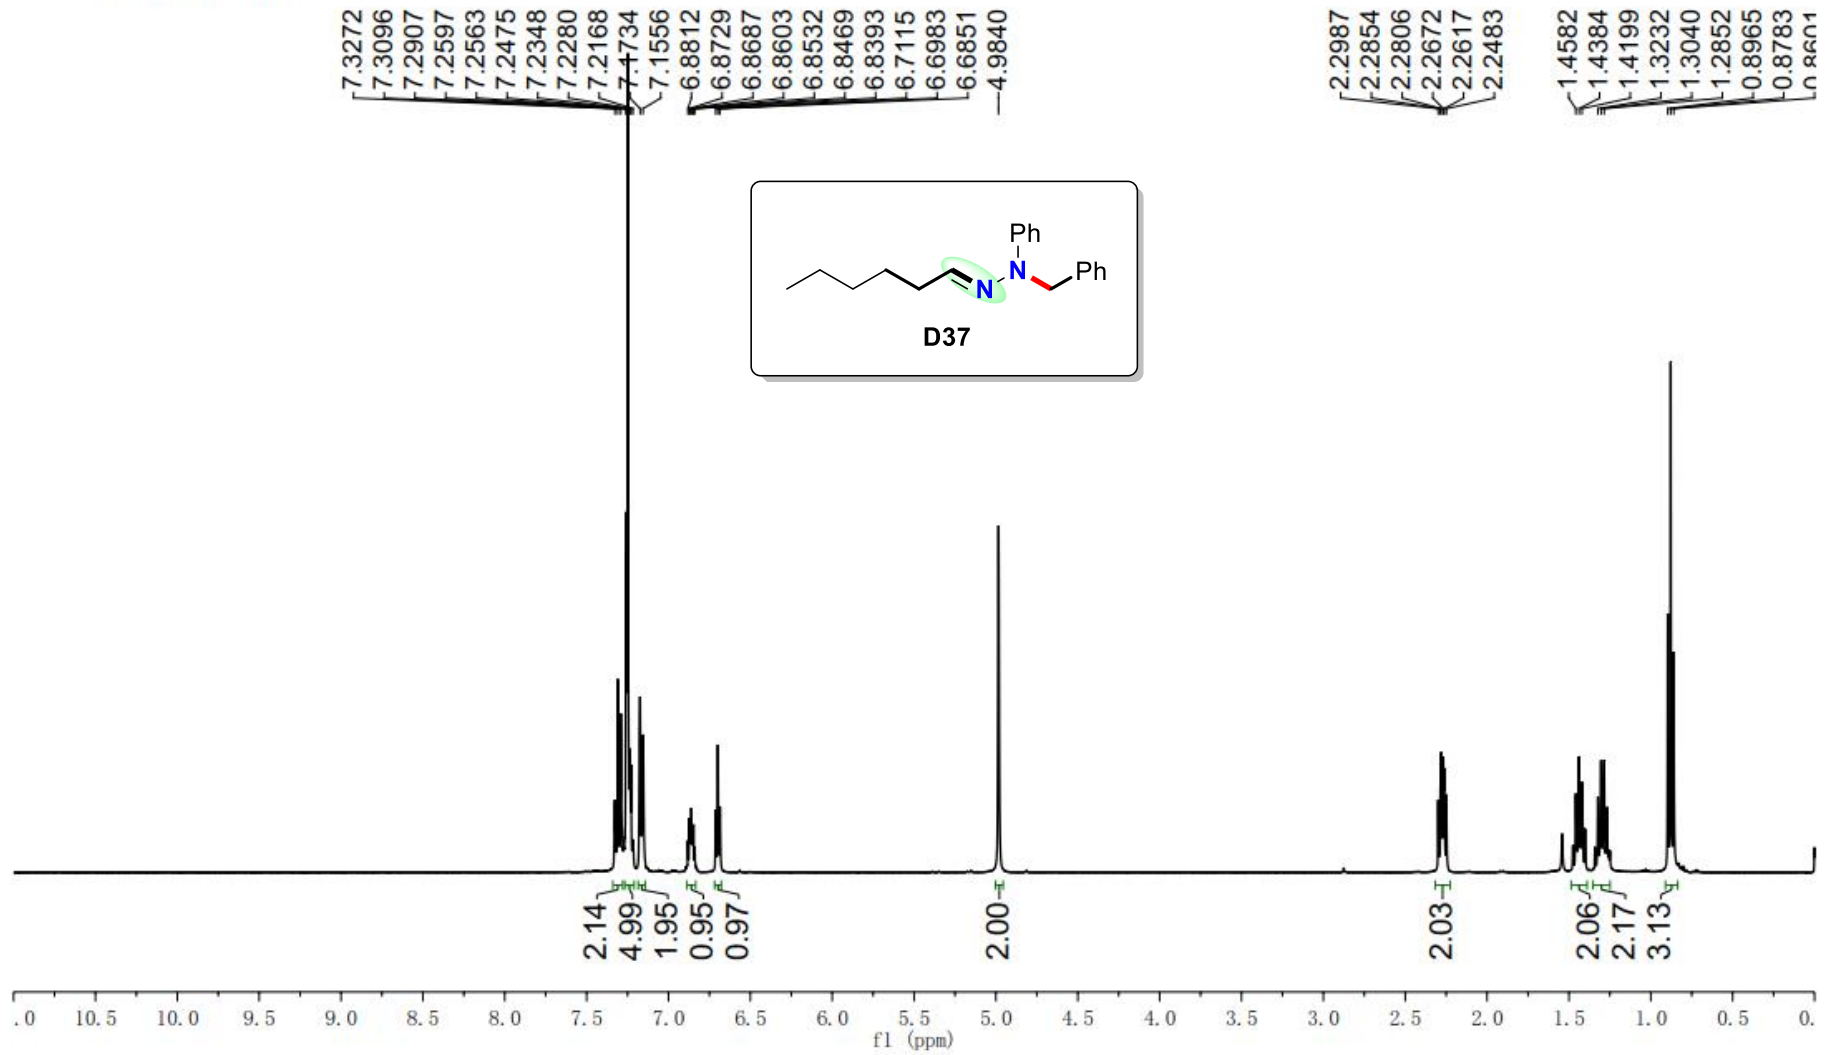

2022-9-19 yy0036-616-1qq-e37

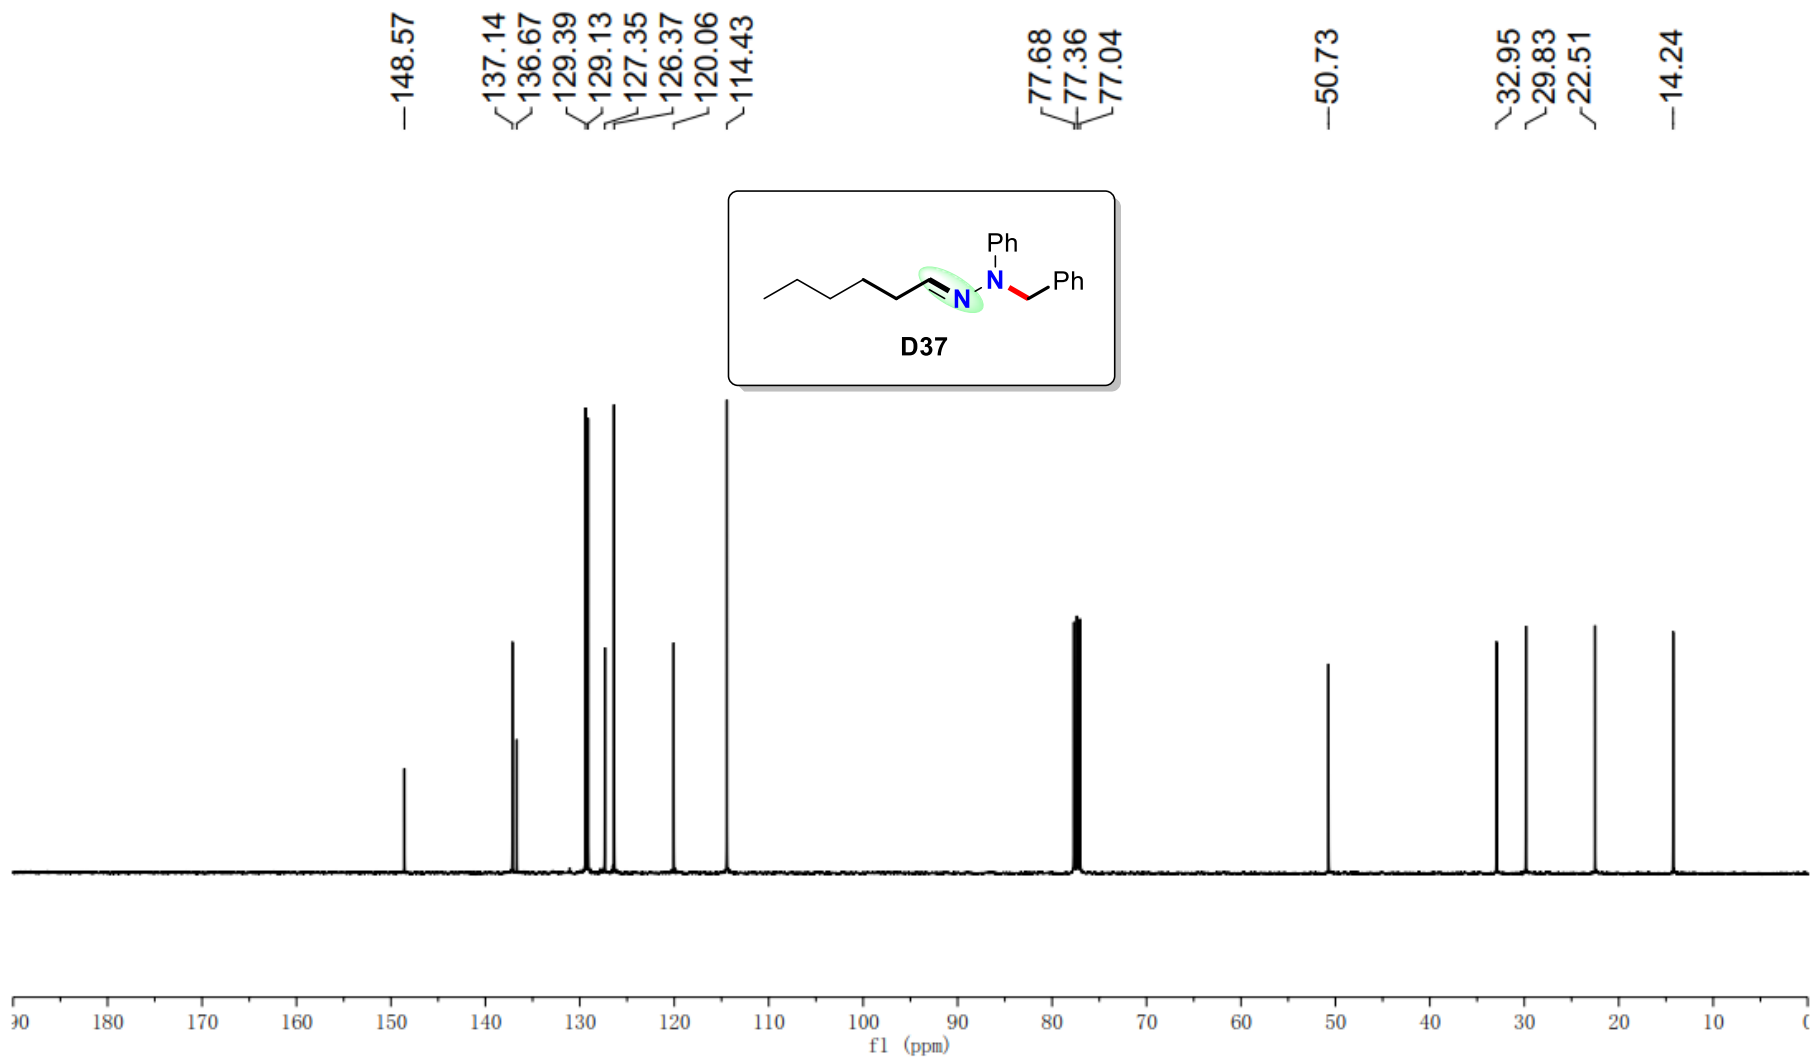



2022-06-20 yy0003-616-zql-2

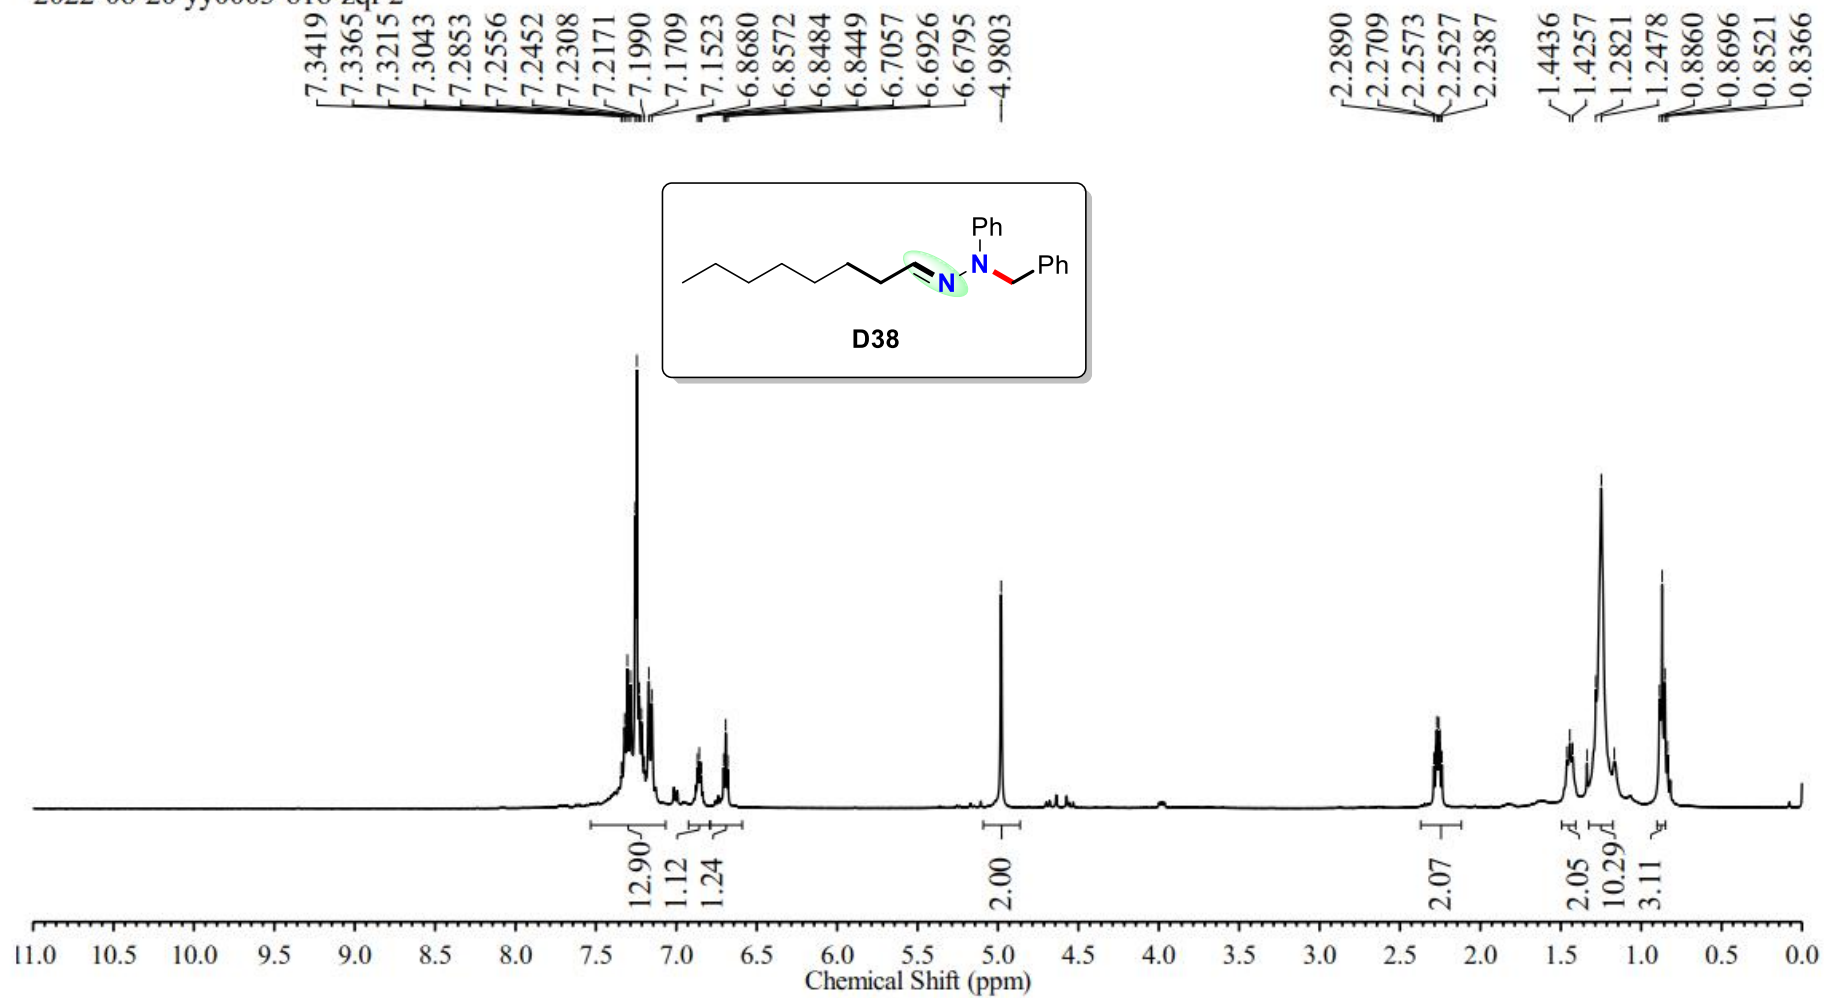

2022-06-21 yy0027 616-zql-2

148.30 136.92 136.39 129.10 128.97 128.85 128.51 128.26 128.03 127.44 127.07 126.09 119.77 114.16 113.53 77.40 77.08 76.76 50.44 32.97 31.83 29.16 29.08 27.45 22.68 14.15

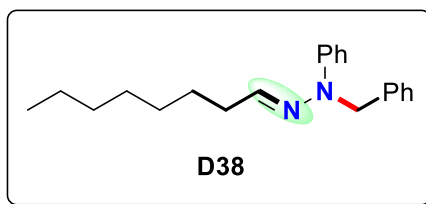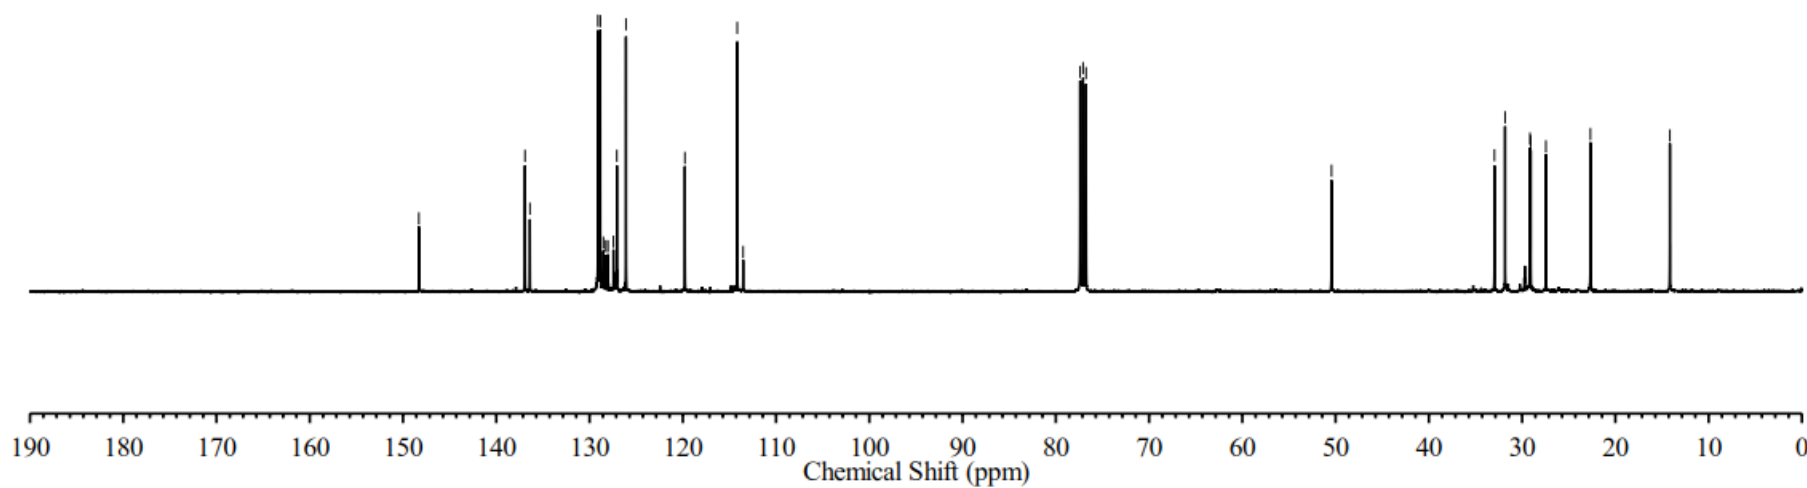

2022-05-10 YY0015-616-zql-2

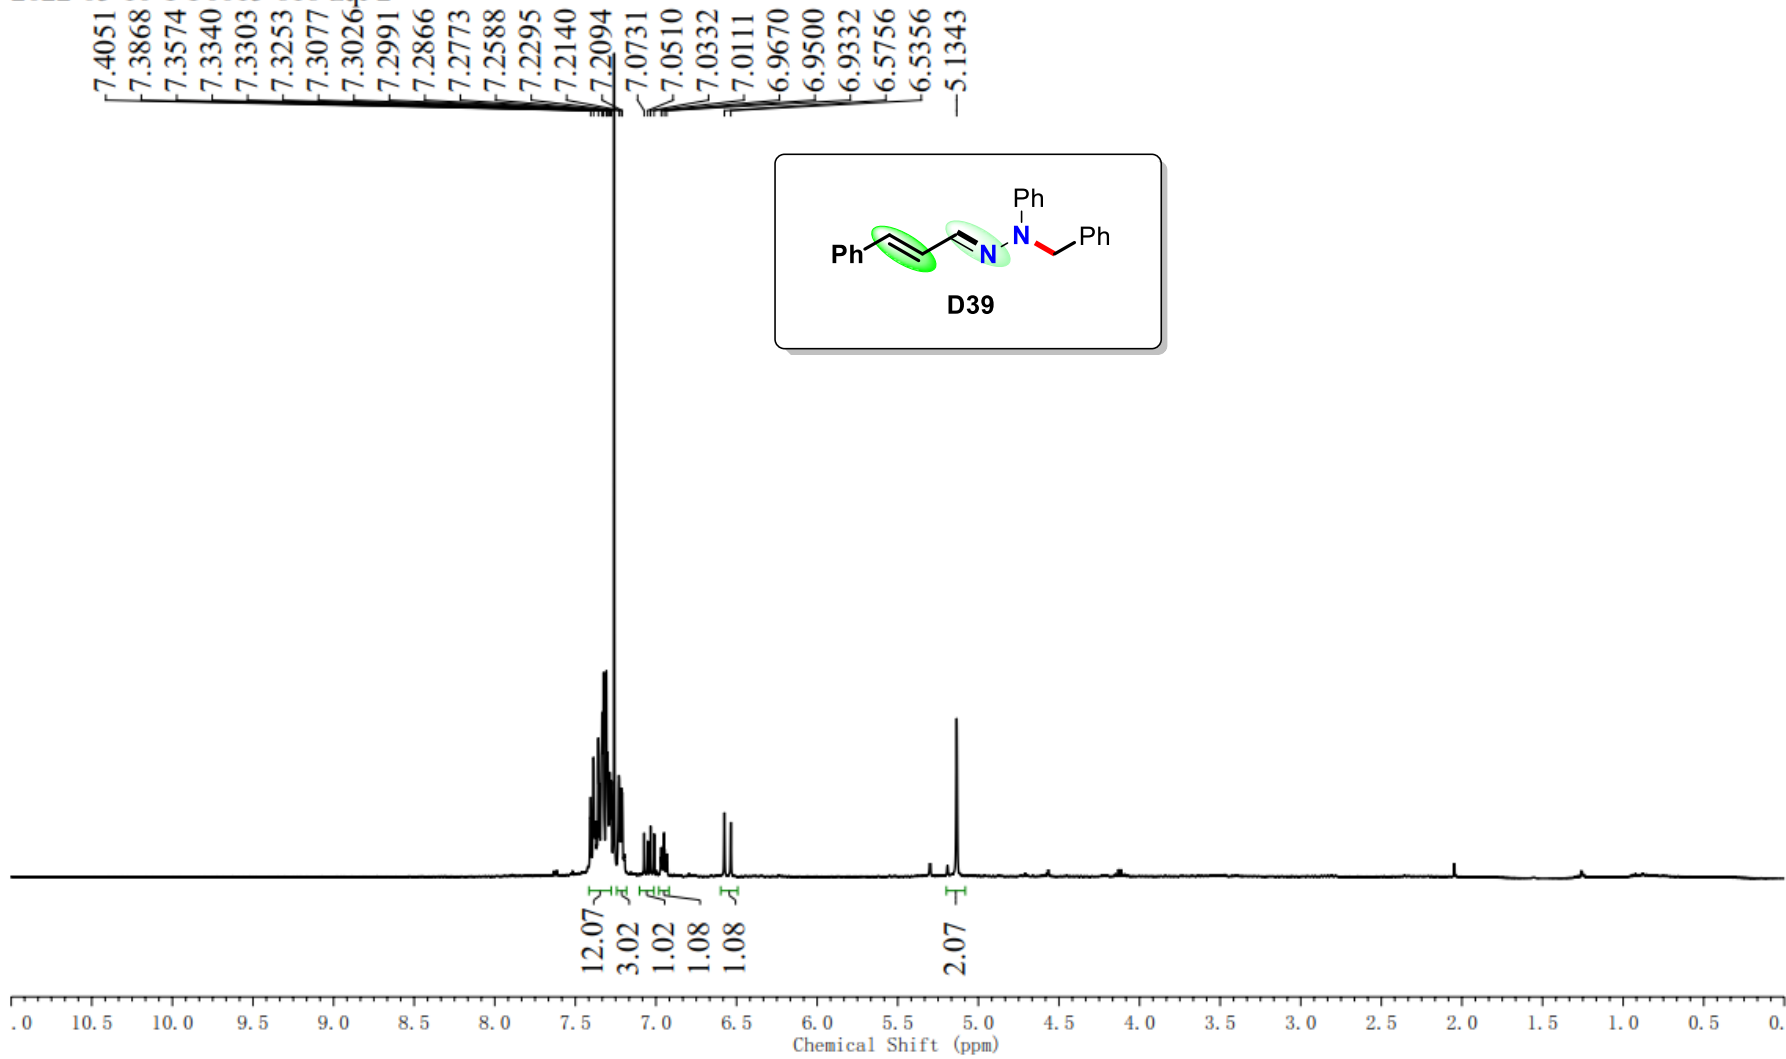

2022-05-14 YY0016-616-ZQL-2

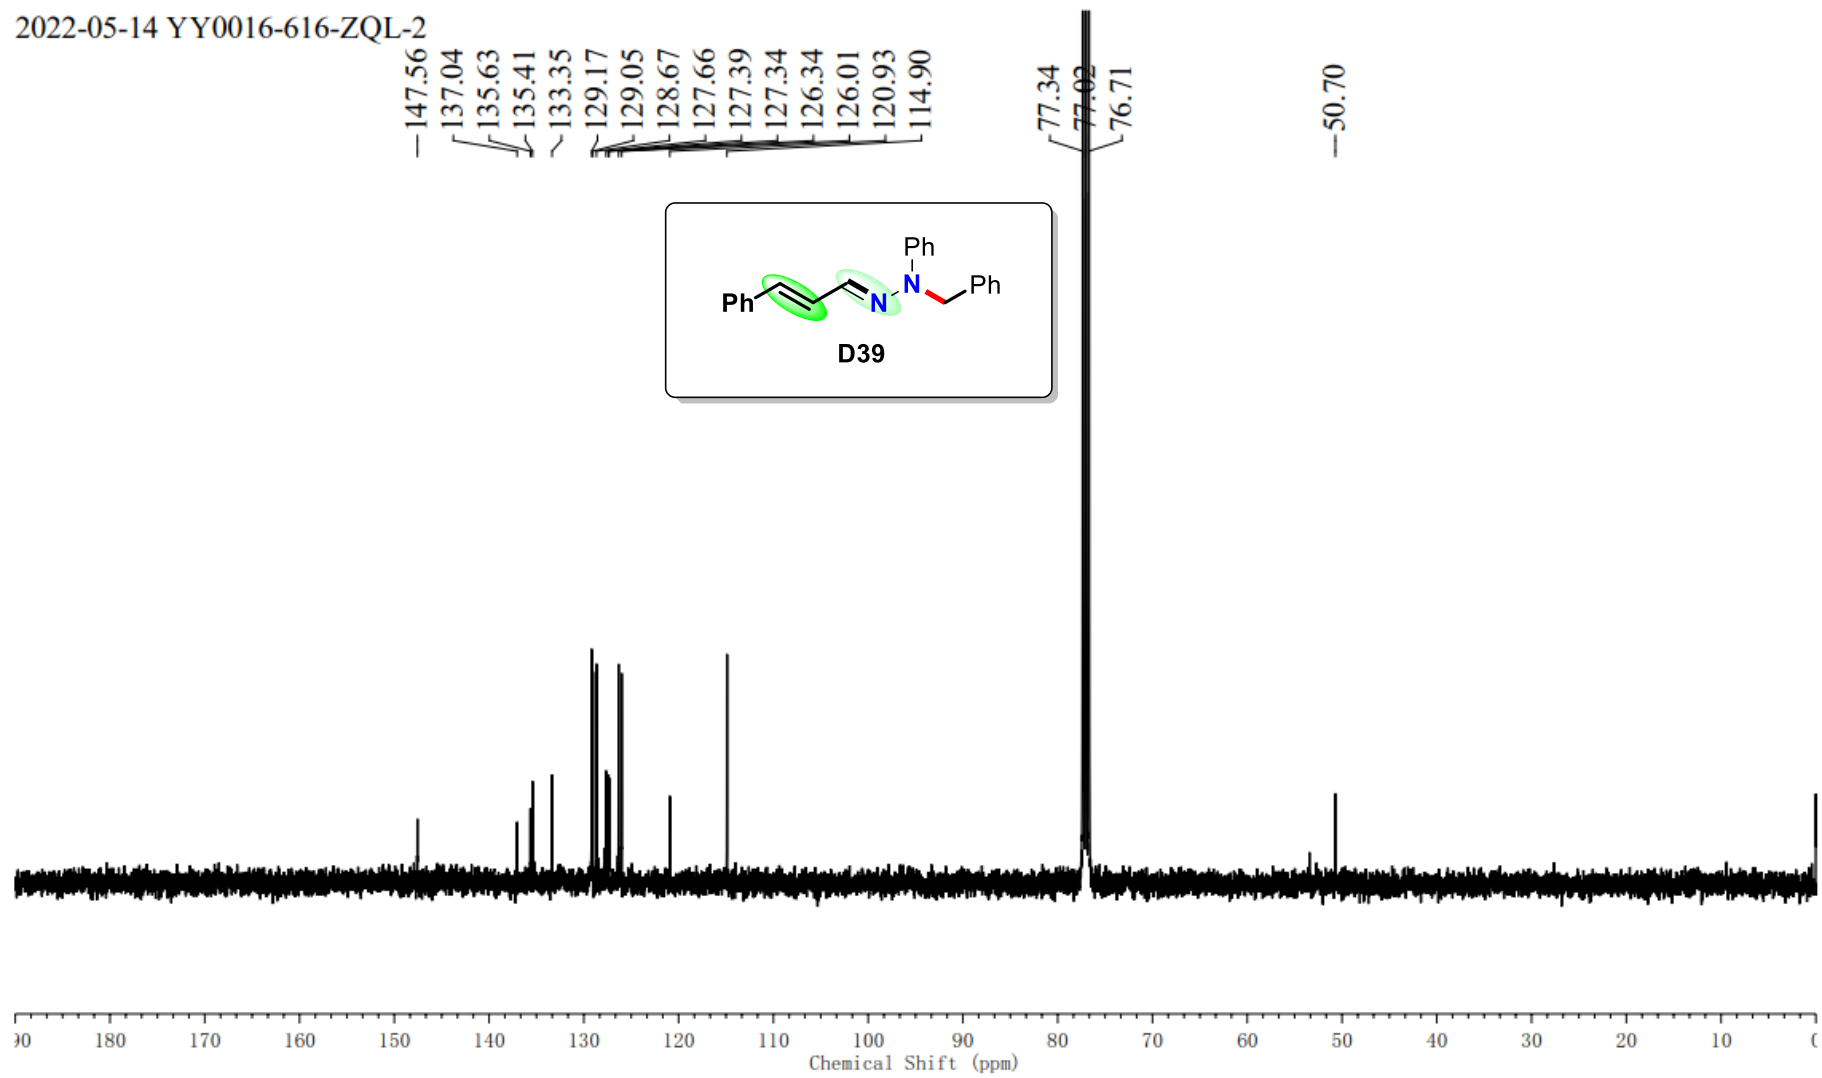

2022-6-11 YY0001-616-ZQL-1

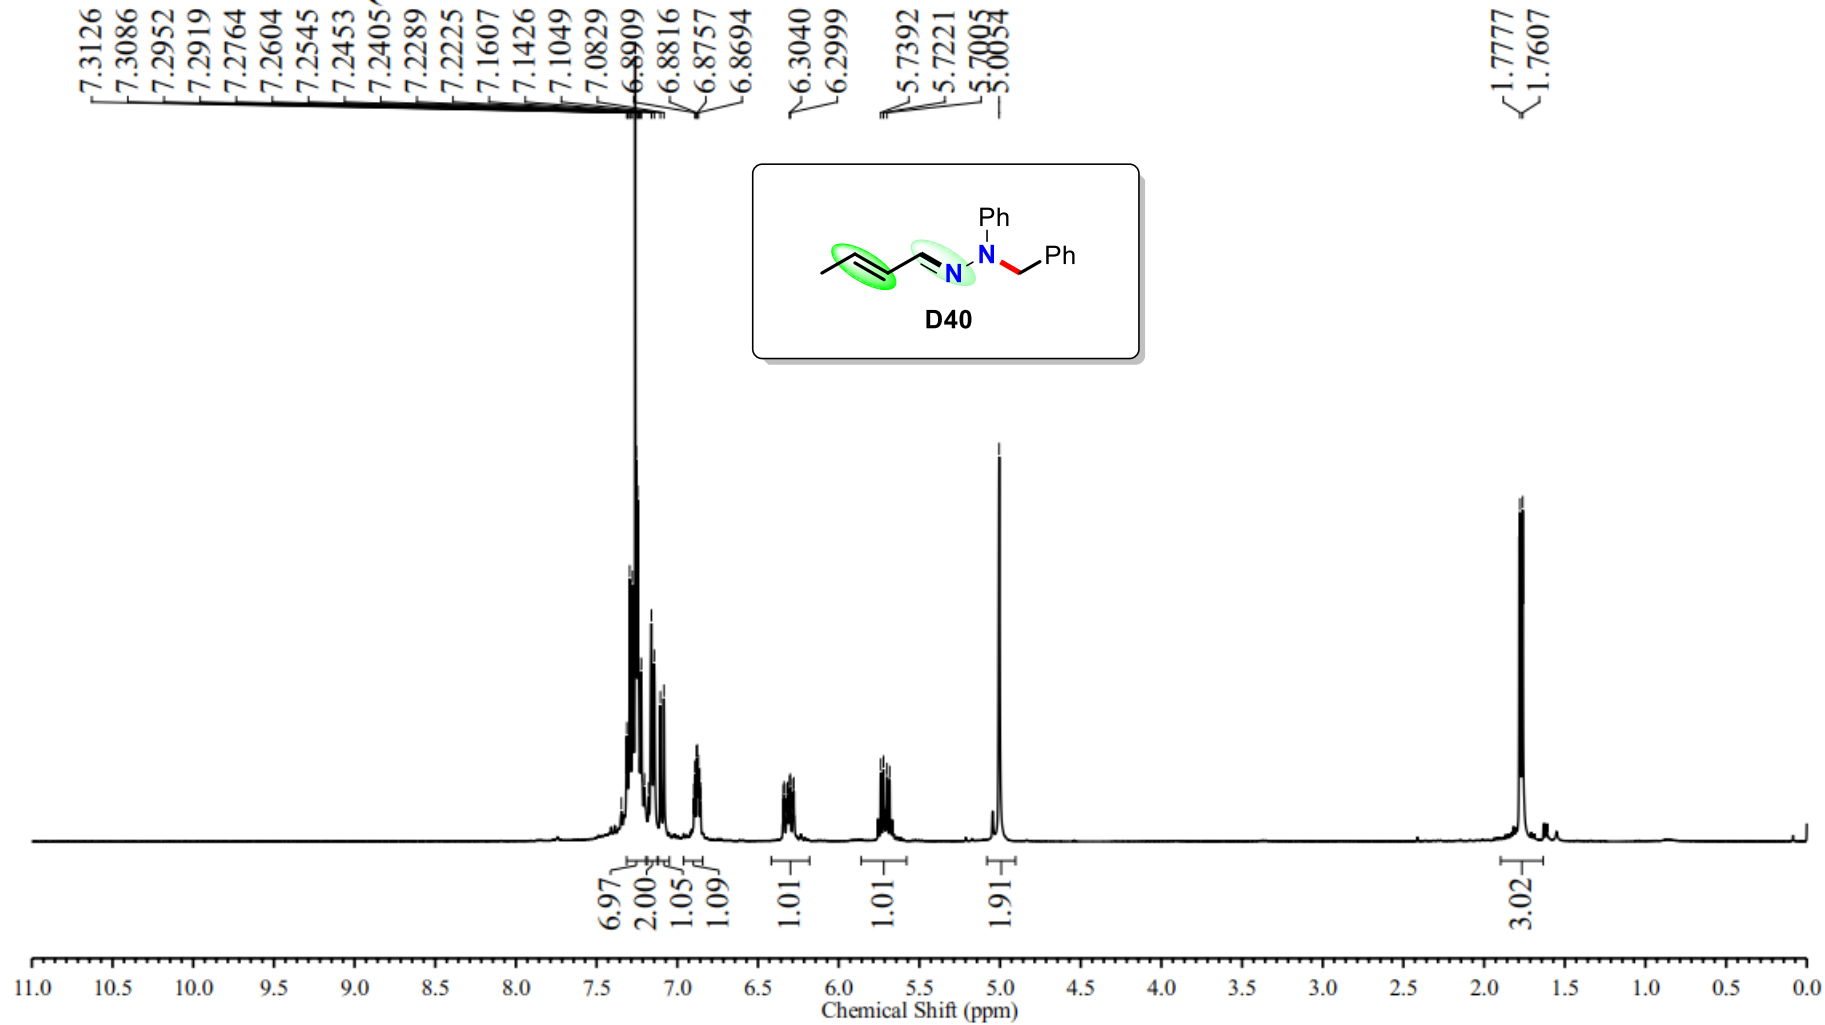

2022-6-13 YY0016-616-ZQL-10-1

147.86  
136.09  
135.78  
131.68  
130.33  
129.16  
129.01  
127.25  
126.07  
120.40  
114.59  
77.47  
77.16  
76.84  
50.45  
18.39

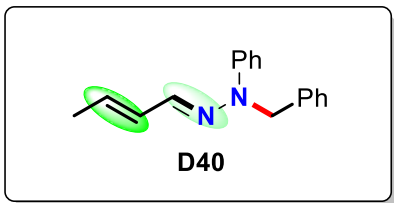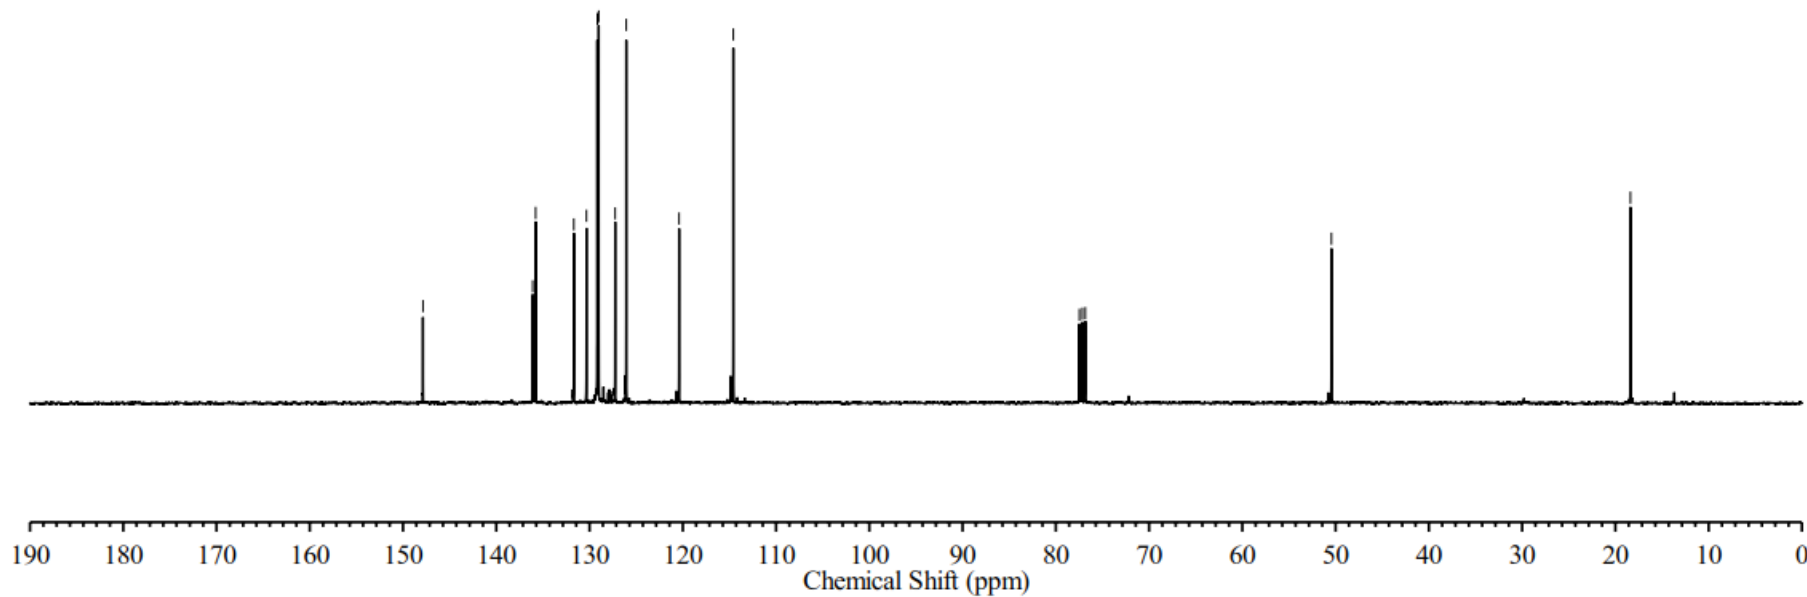

2022-05-20-yy0030-616-zql-2

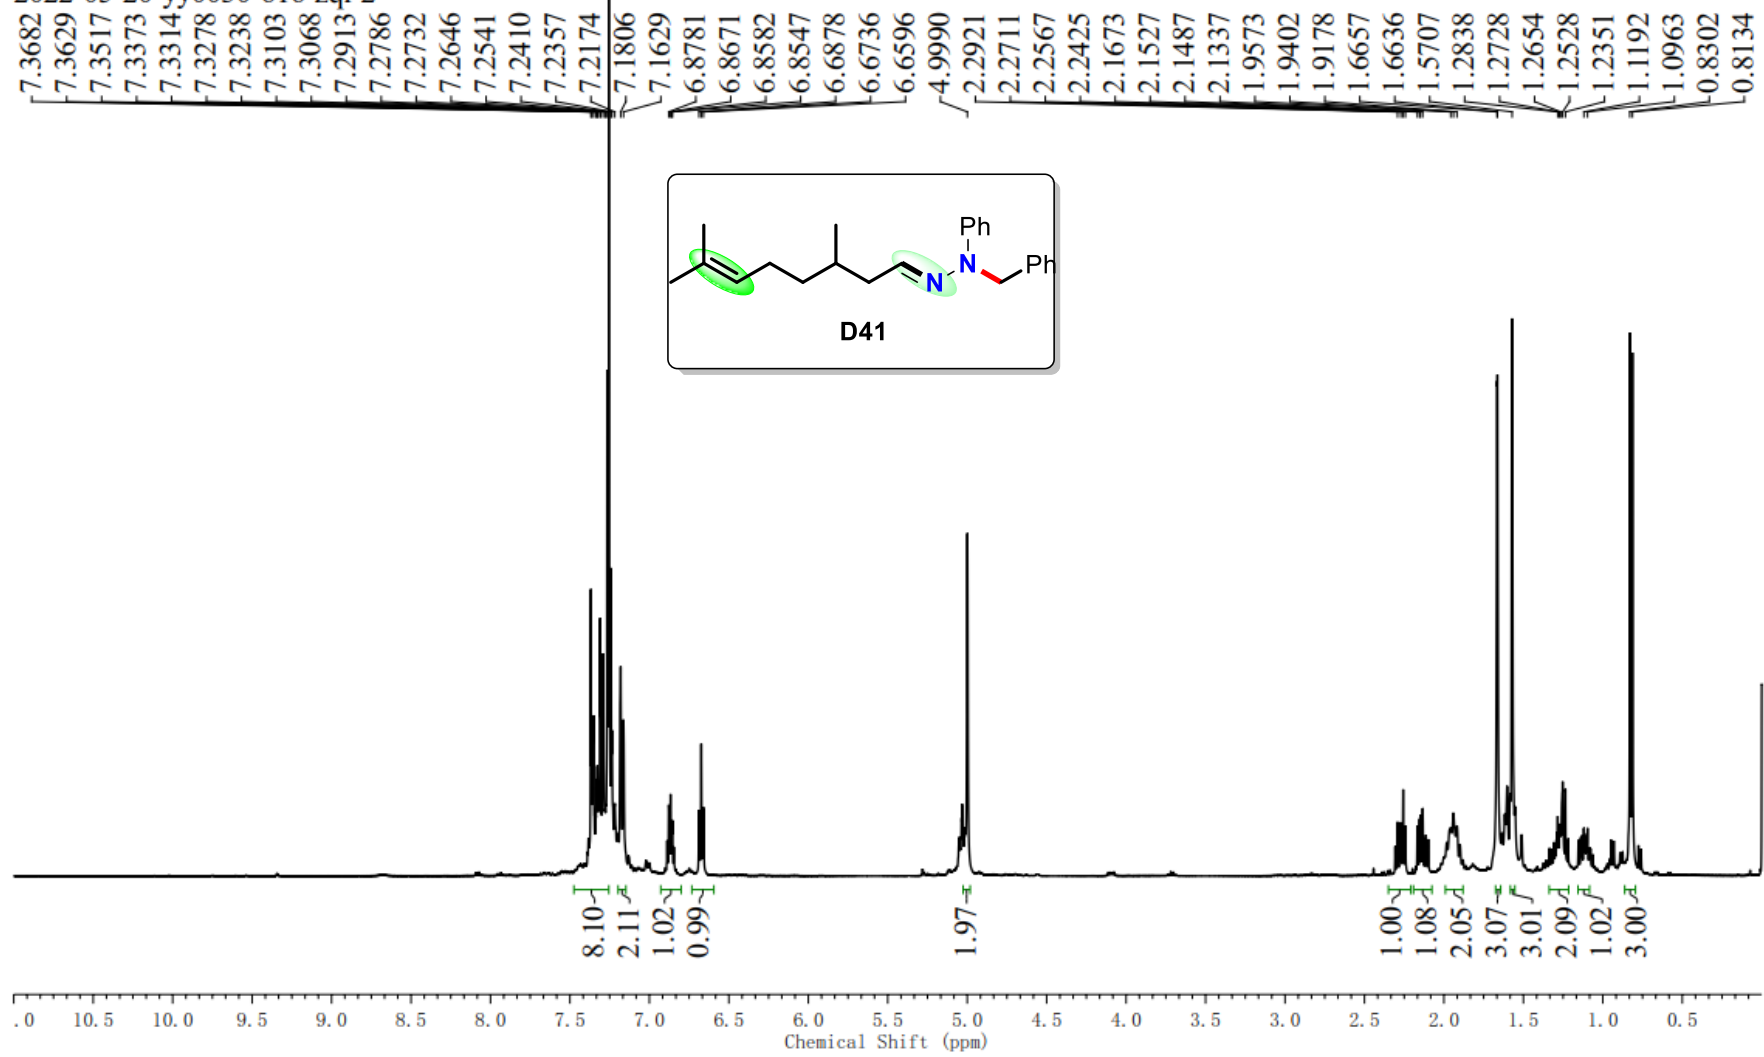

2022-05-25-yy0008-616-zql-19-2

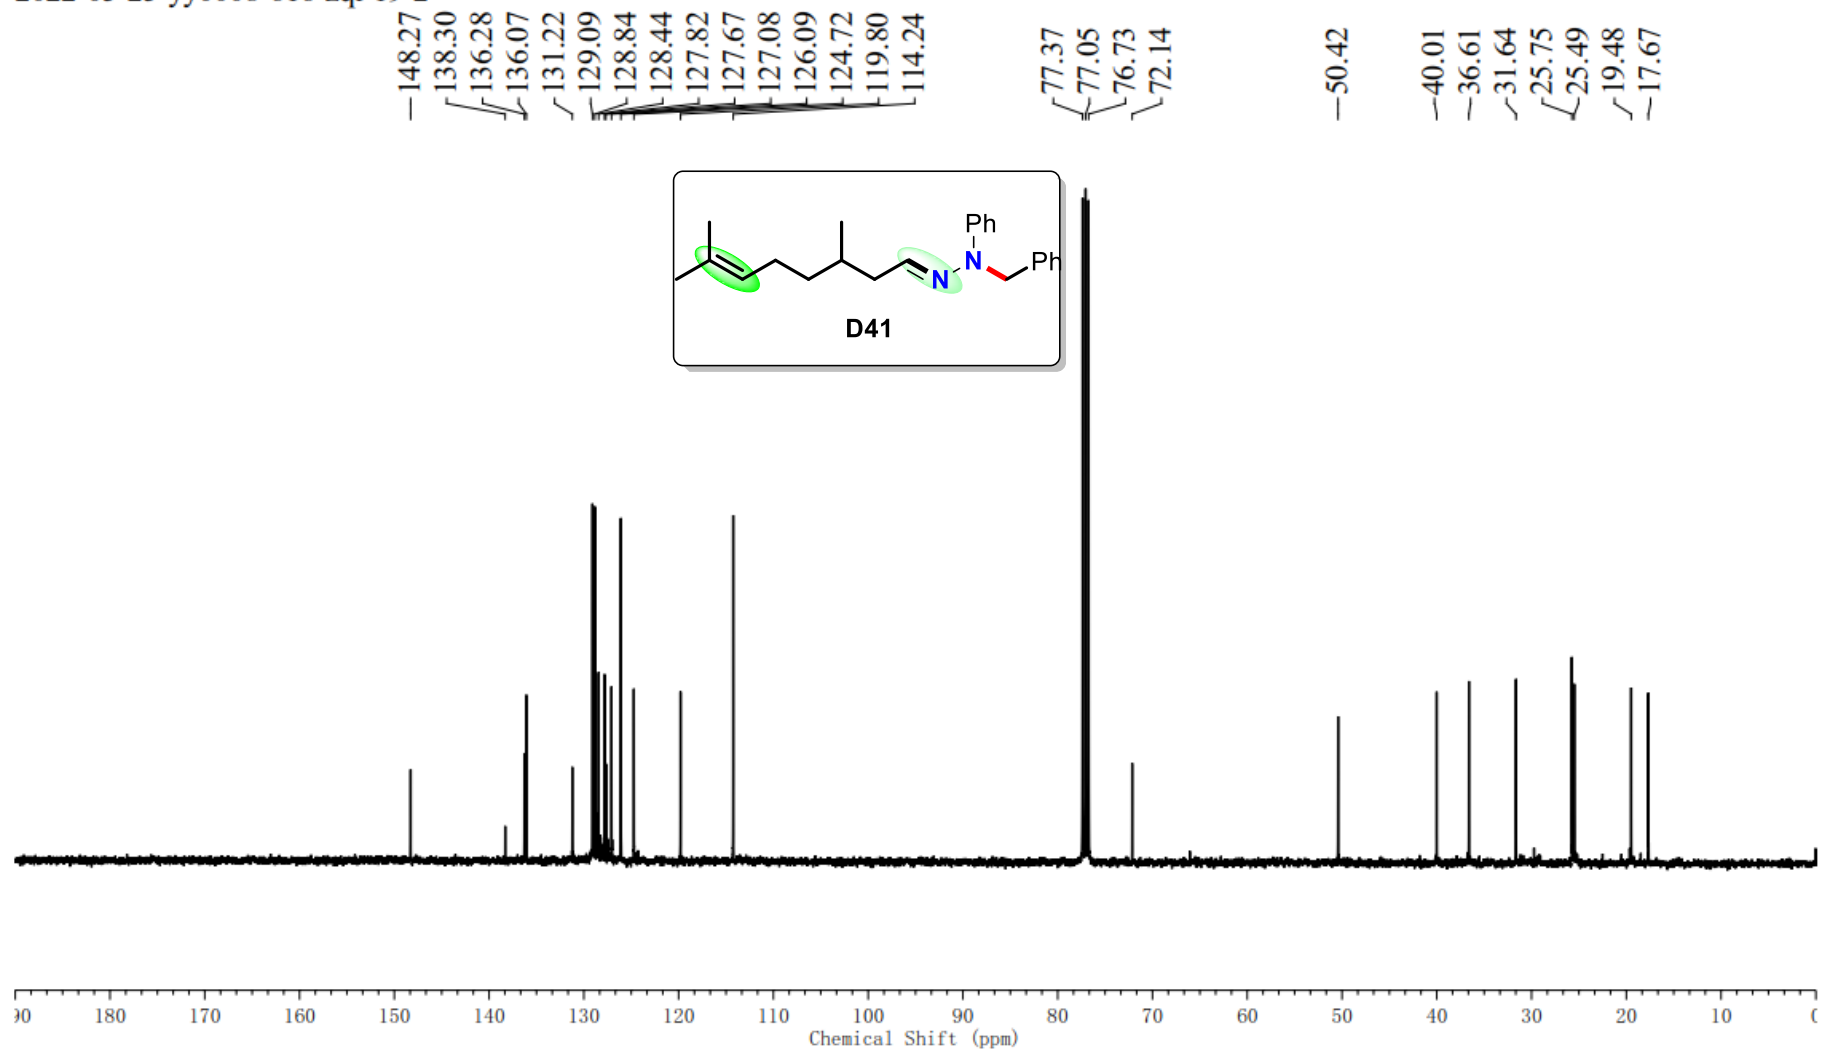



2022-6-11 YY0001-616-ZQL-2

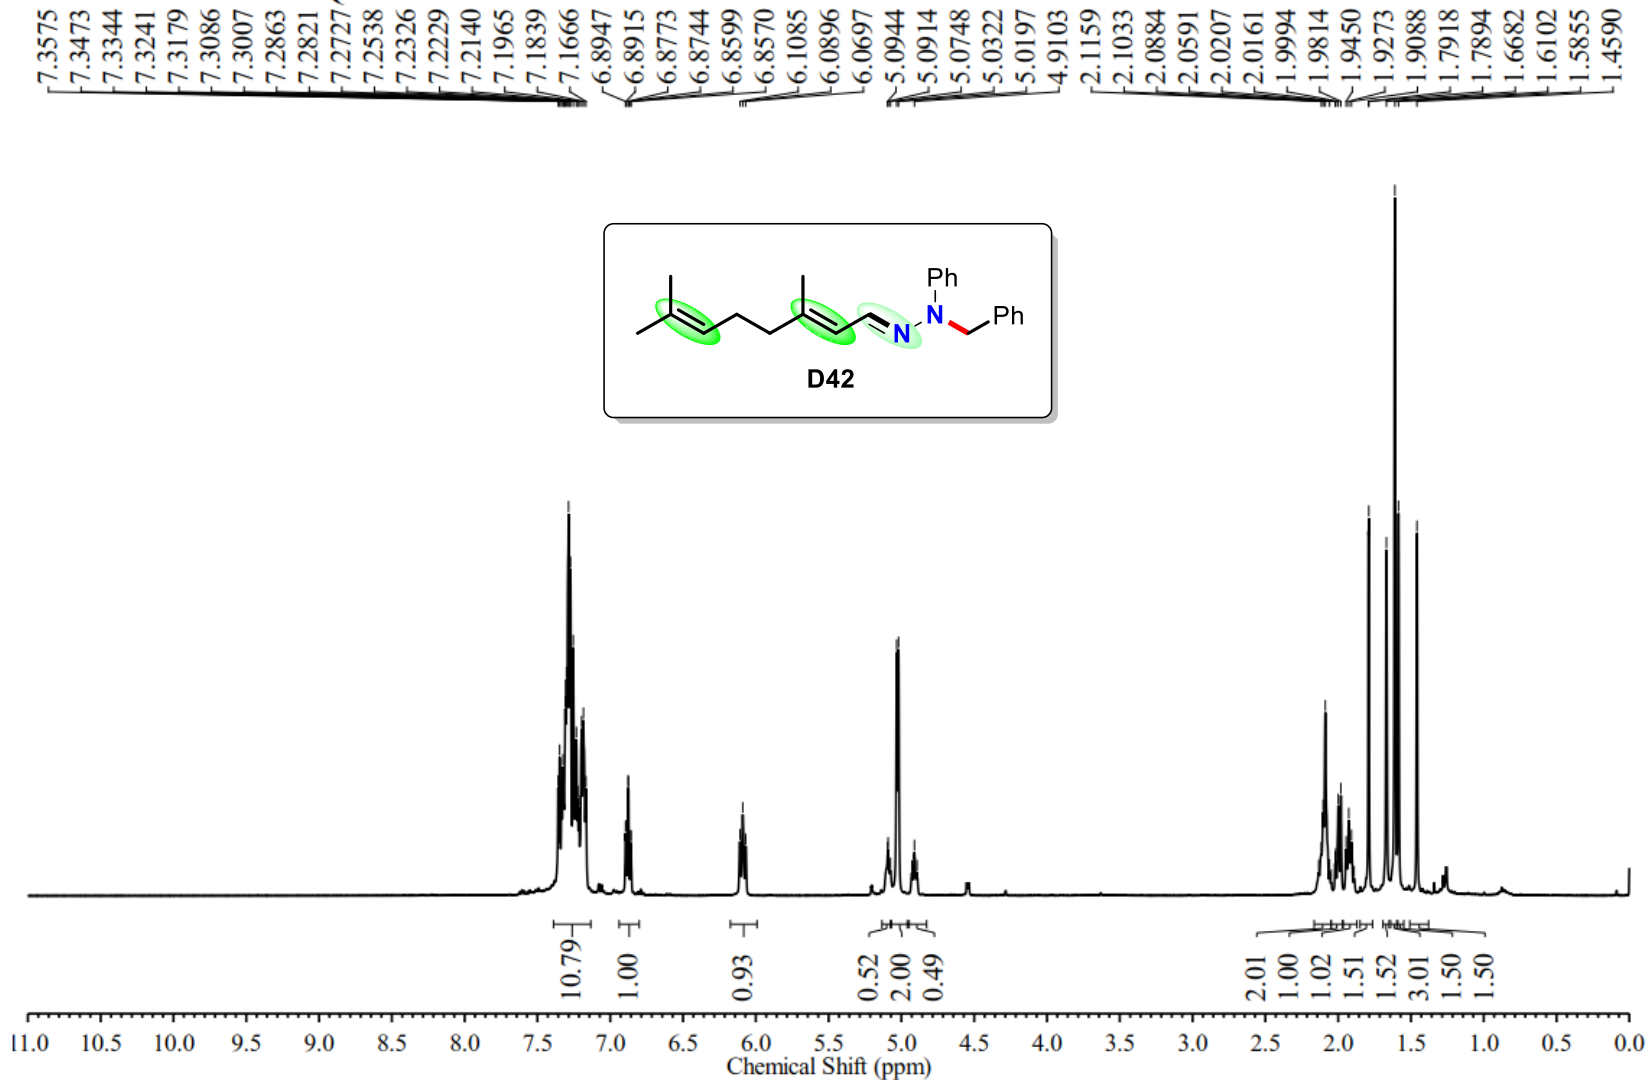

2022-6-13 YY0016-616-ZQL-10-2

148.03 141.79 141.49 136.26 136.24 133.53 132.09 131.94 129.17 129.04 129.02 128.49 127.86 127.28 127.26 126.18 126.11 123.93 123.89 123.66 123.05 120.36 120.32 114.68 114.66 77.48 77.16 76.84 72.19 50.88 50.83 40.14 32.81 26.78 26.54 25.81 25.80 24.23 17.80 17.67 17.06

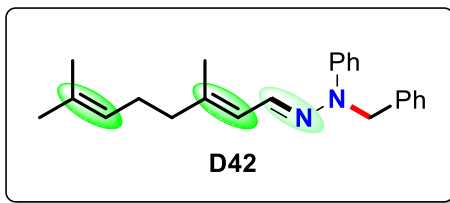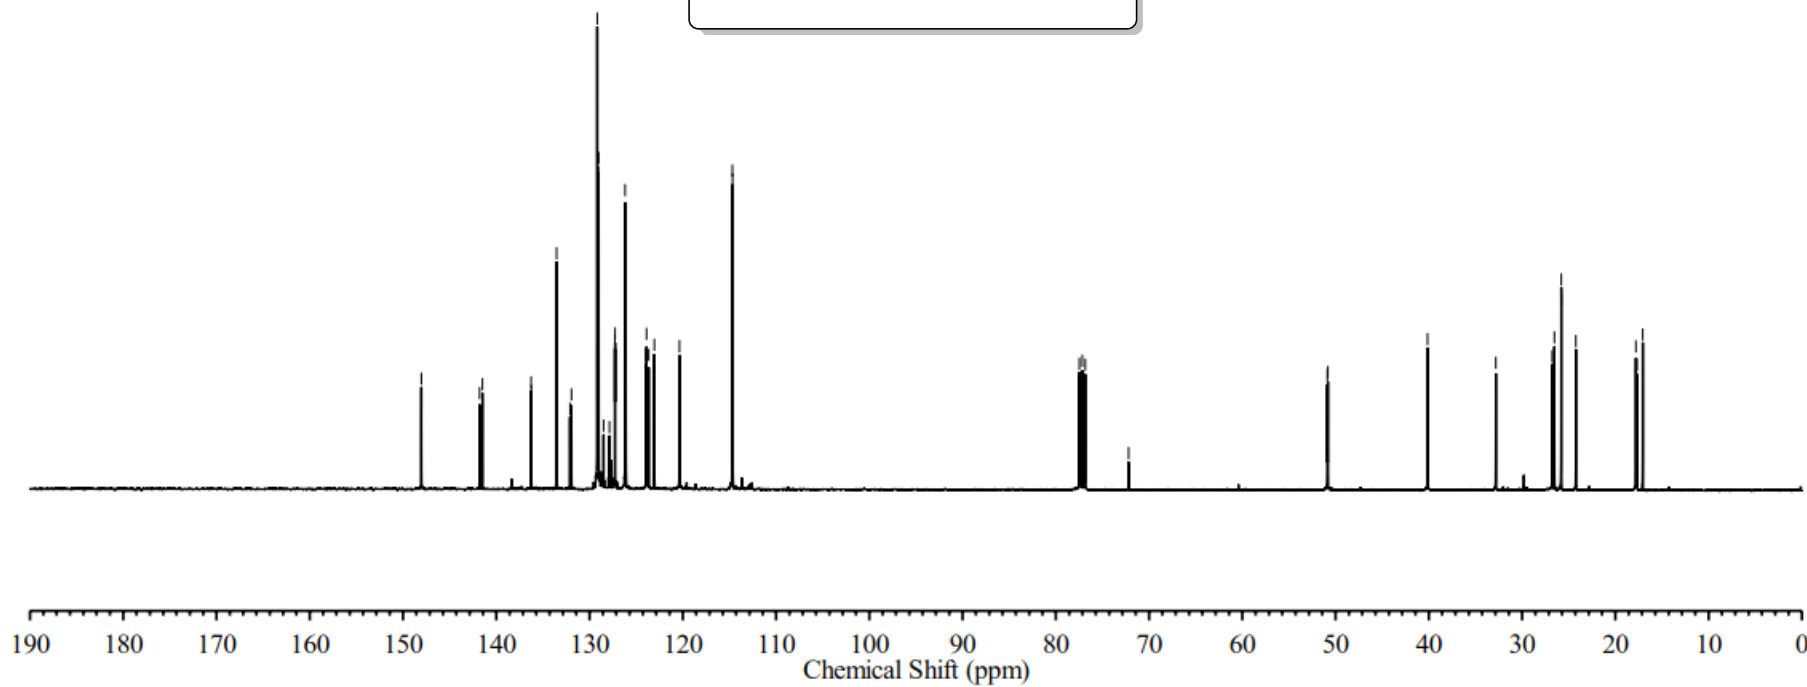

2022-06-24 yy0025 616-zql-2

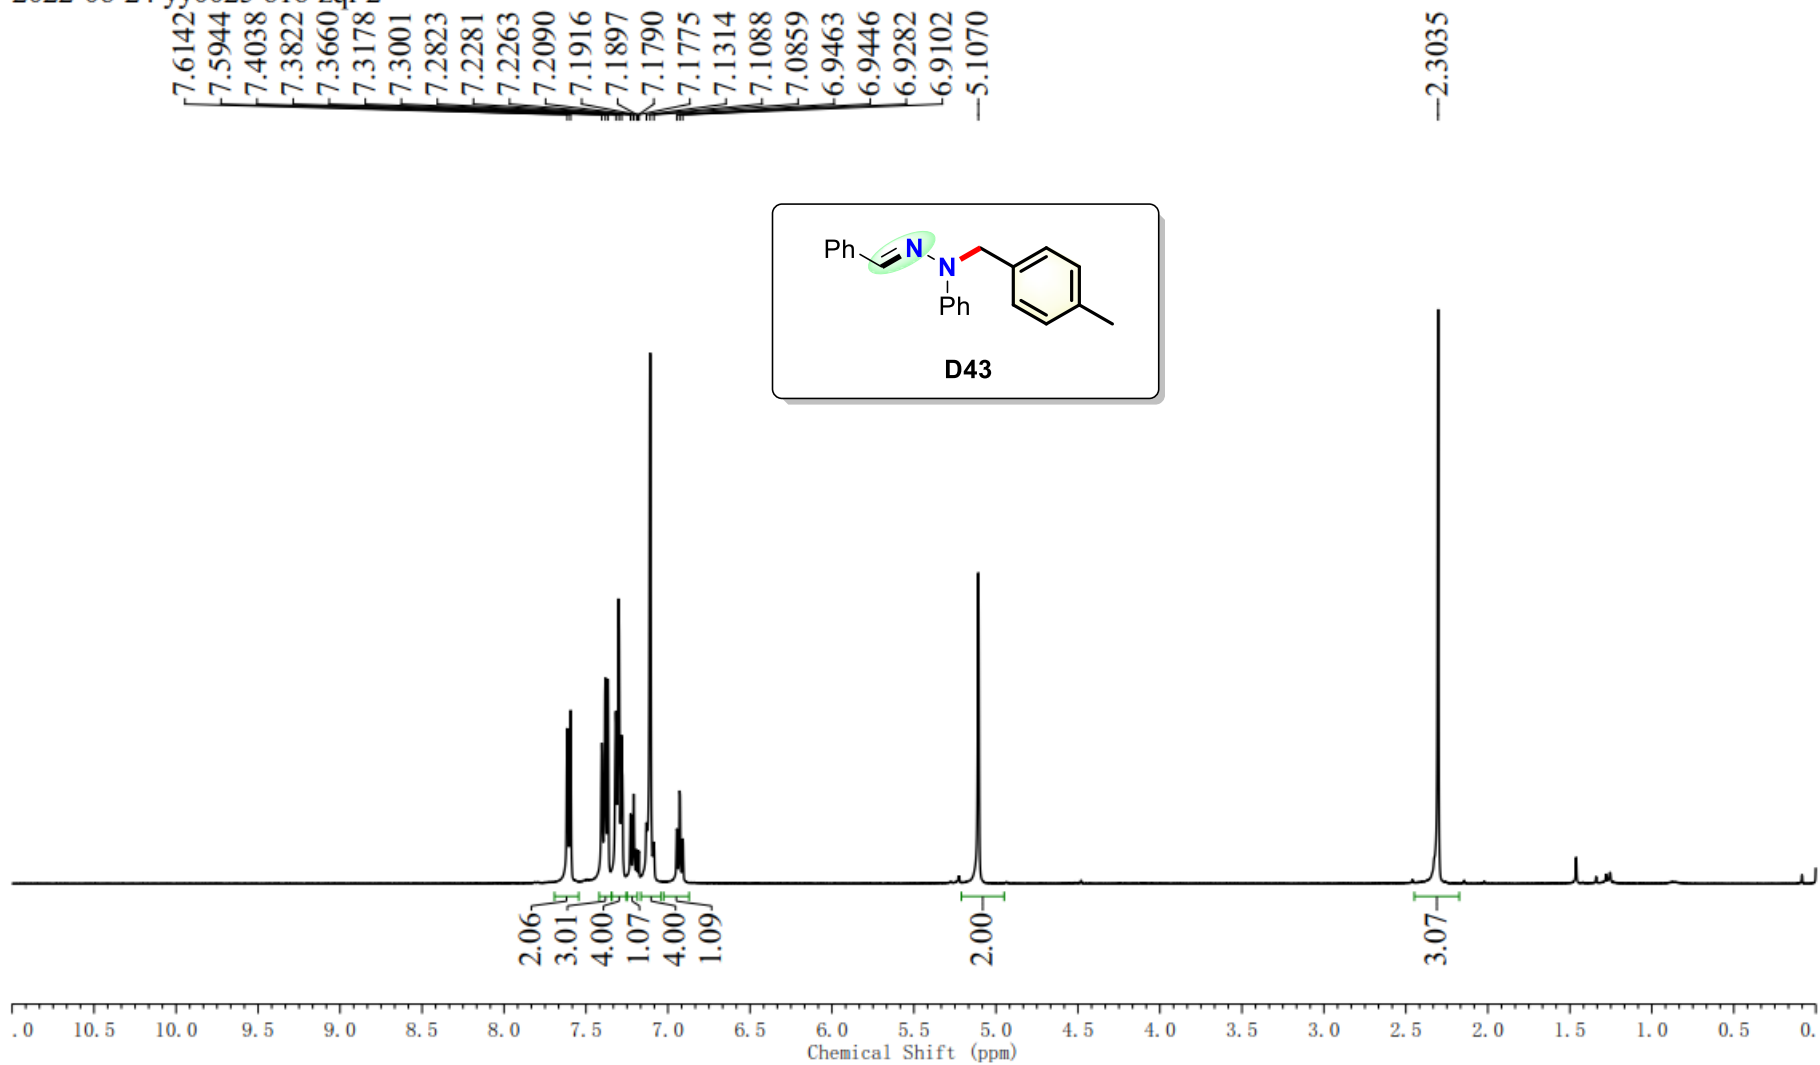

2022-06-28-yy0028-616-20220624-2

148.00  
137.01  
136.70  
132.63  
132.51  
129.79  
129.25  
128.60  
126.29  
126.08  
120.77  
114.88

77.47  
77.15  
76.83

50.27

21.16

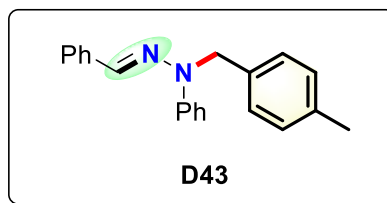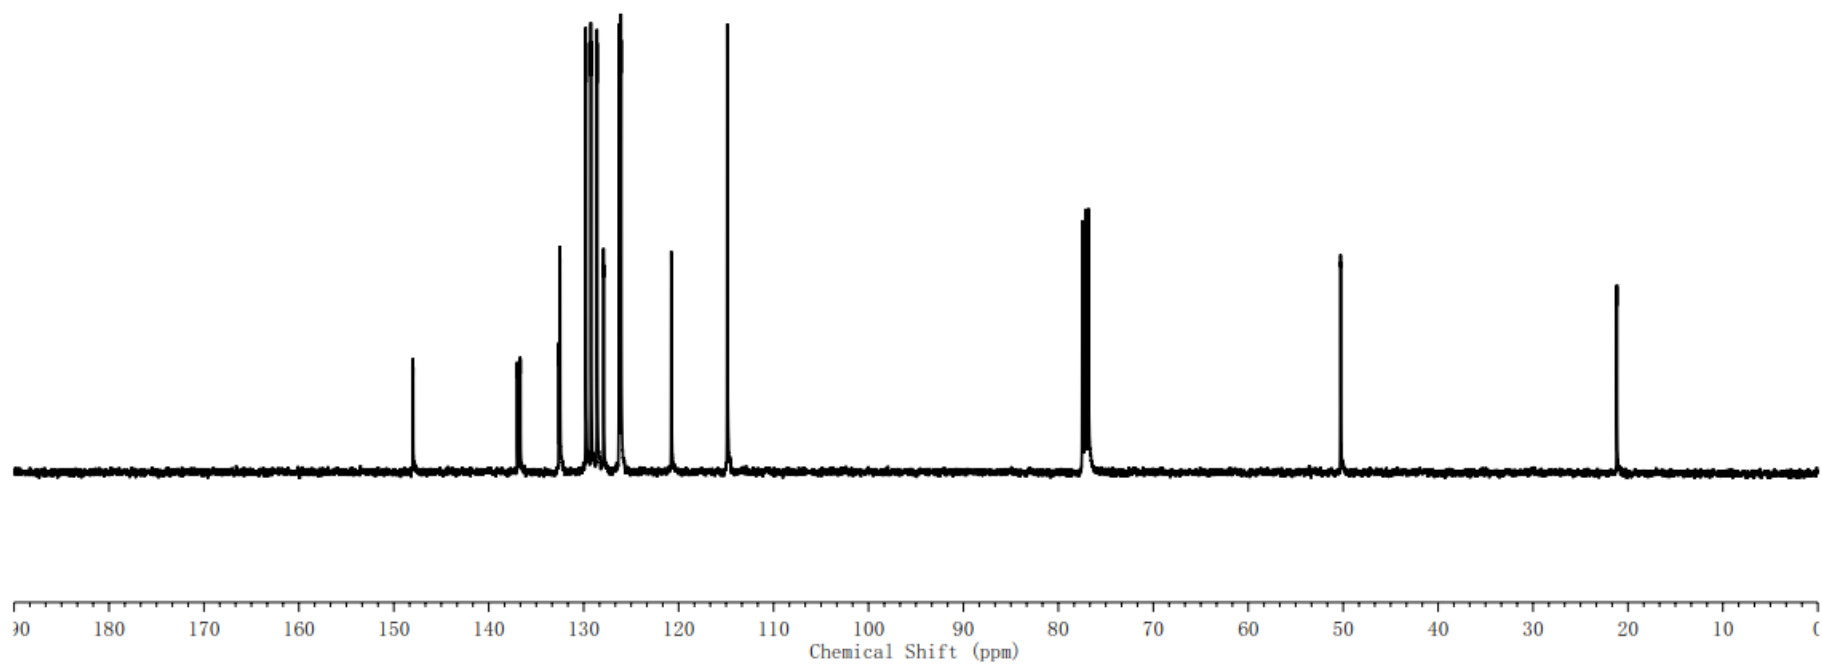

2022-11-09-yy0022-616-d7

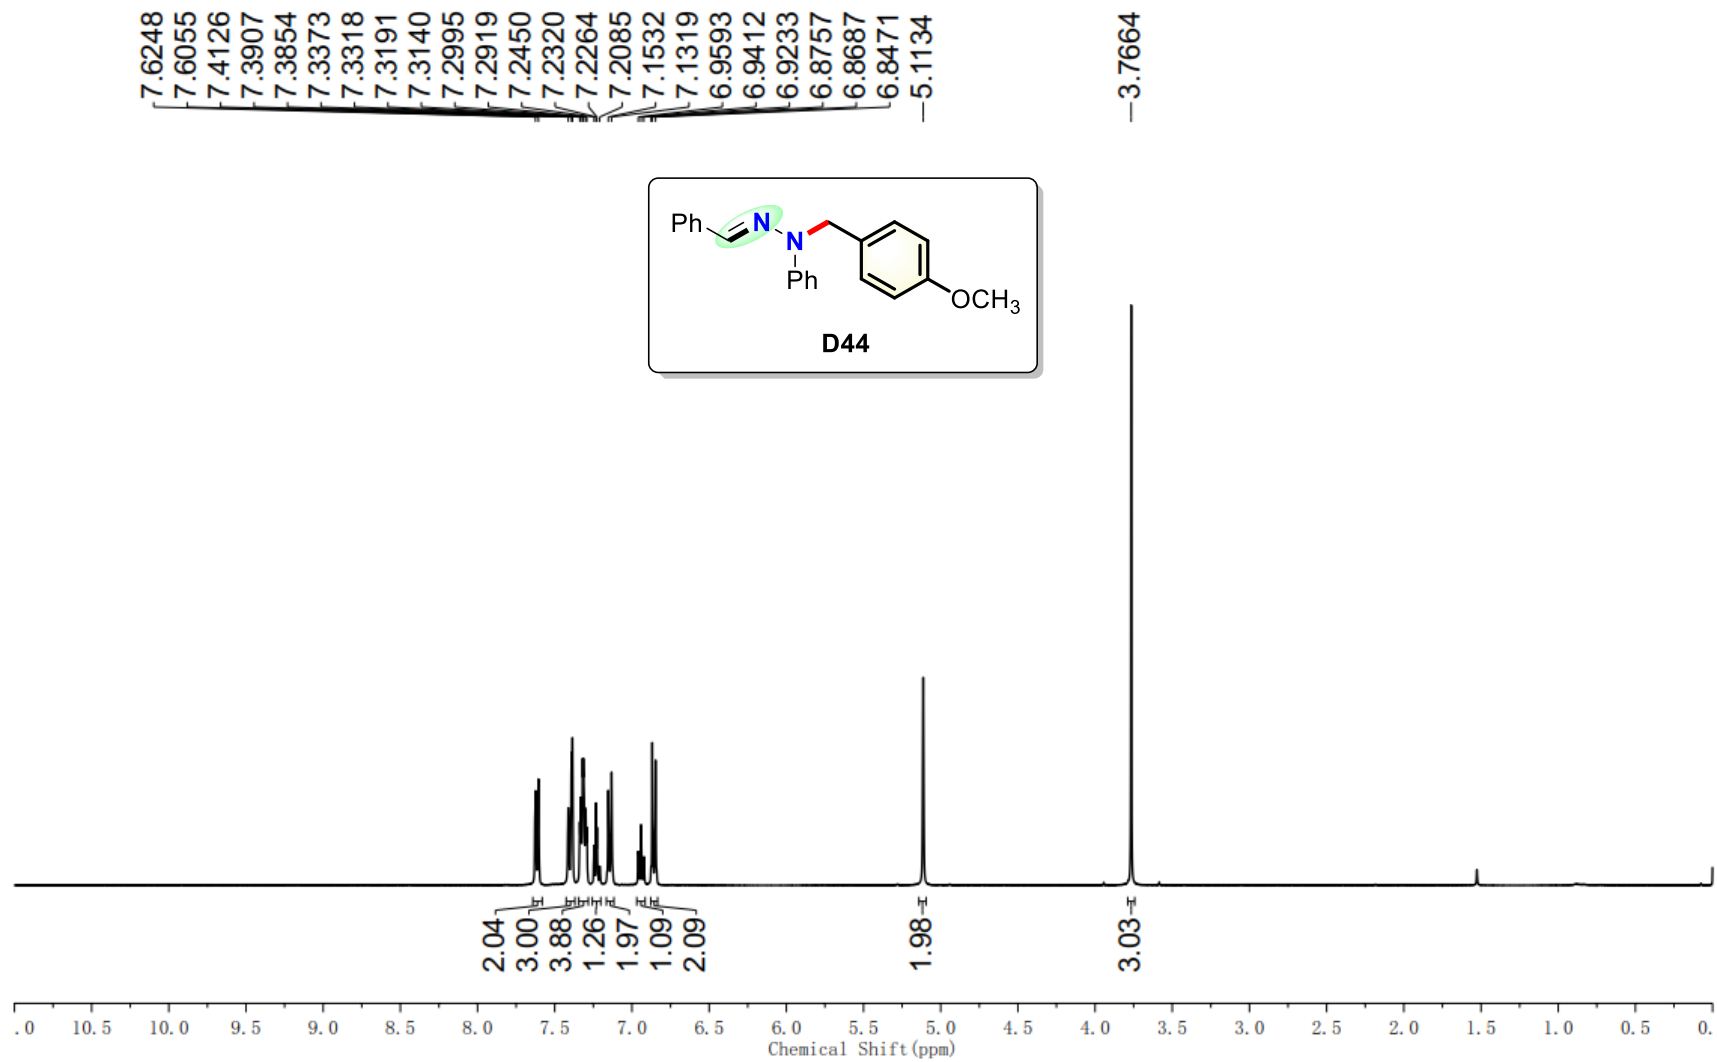

2022-05-26-YY0026-616-20220523-3

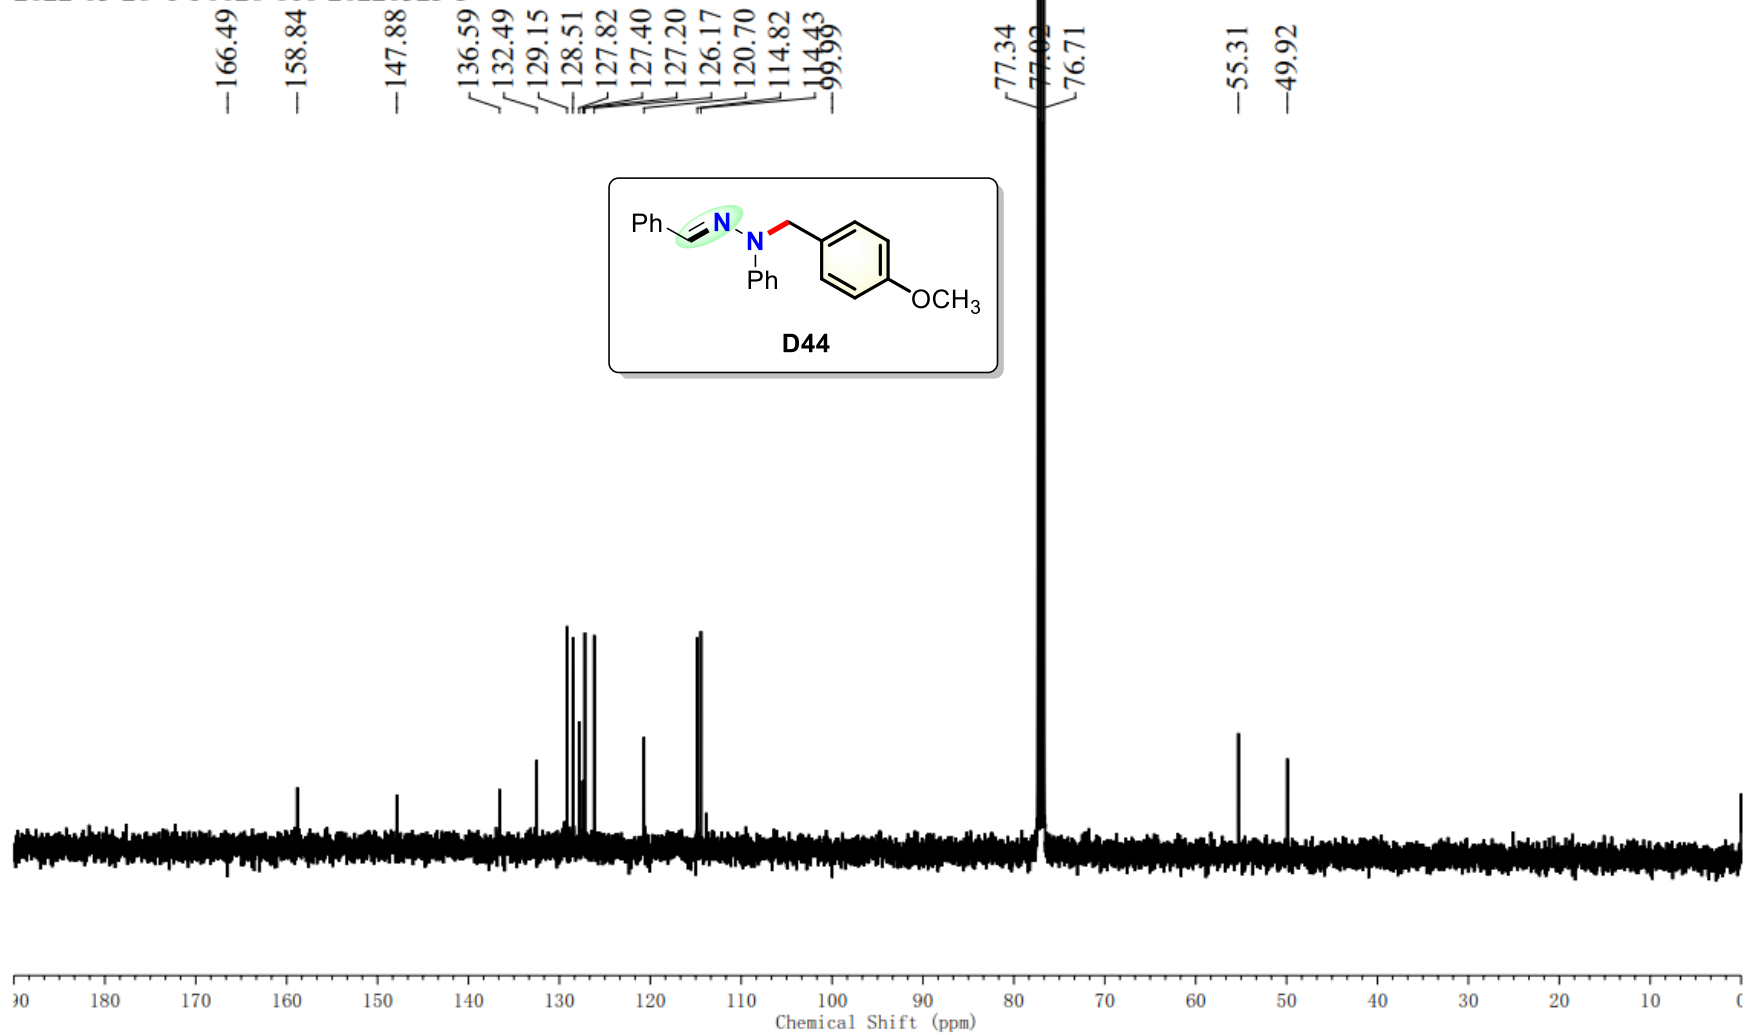

2022-05-23-yy0007-616-zql-1

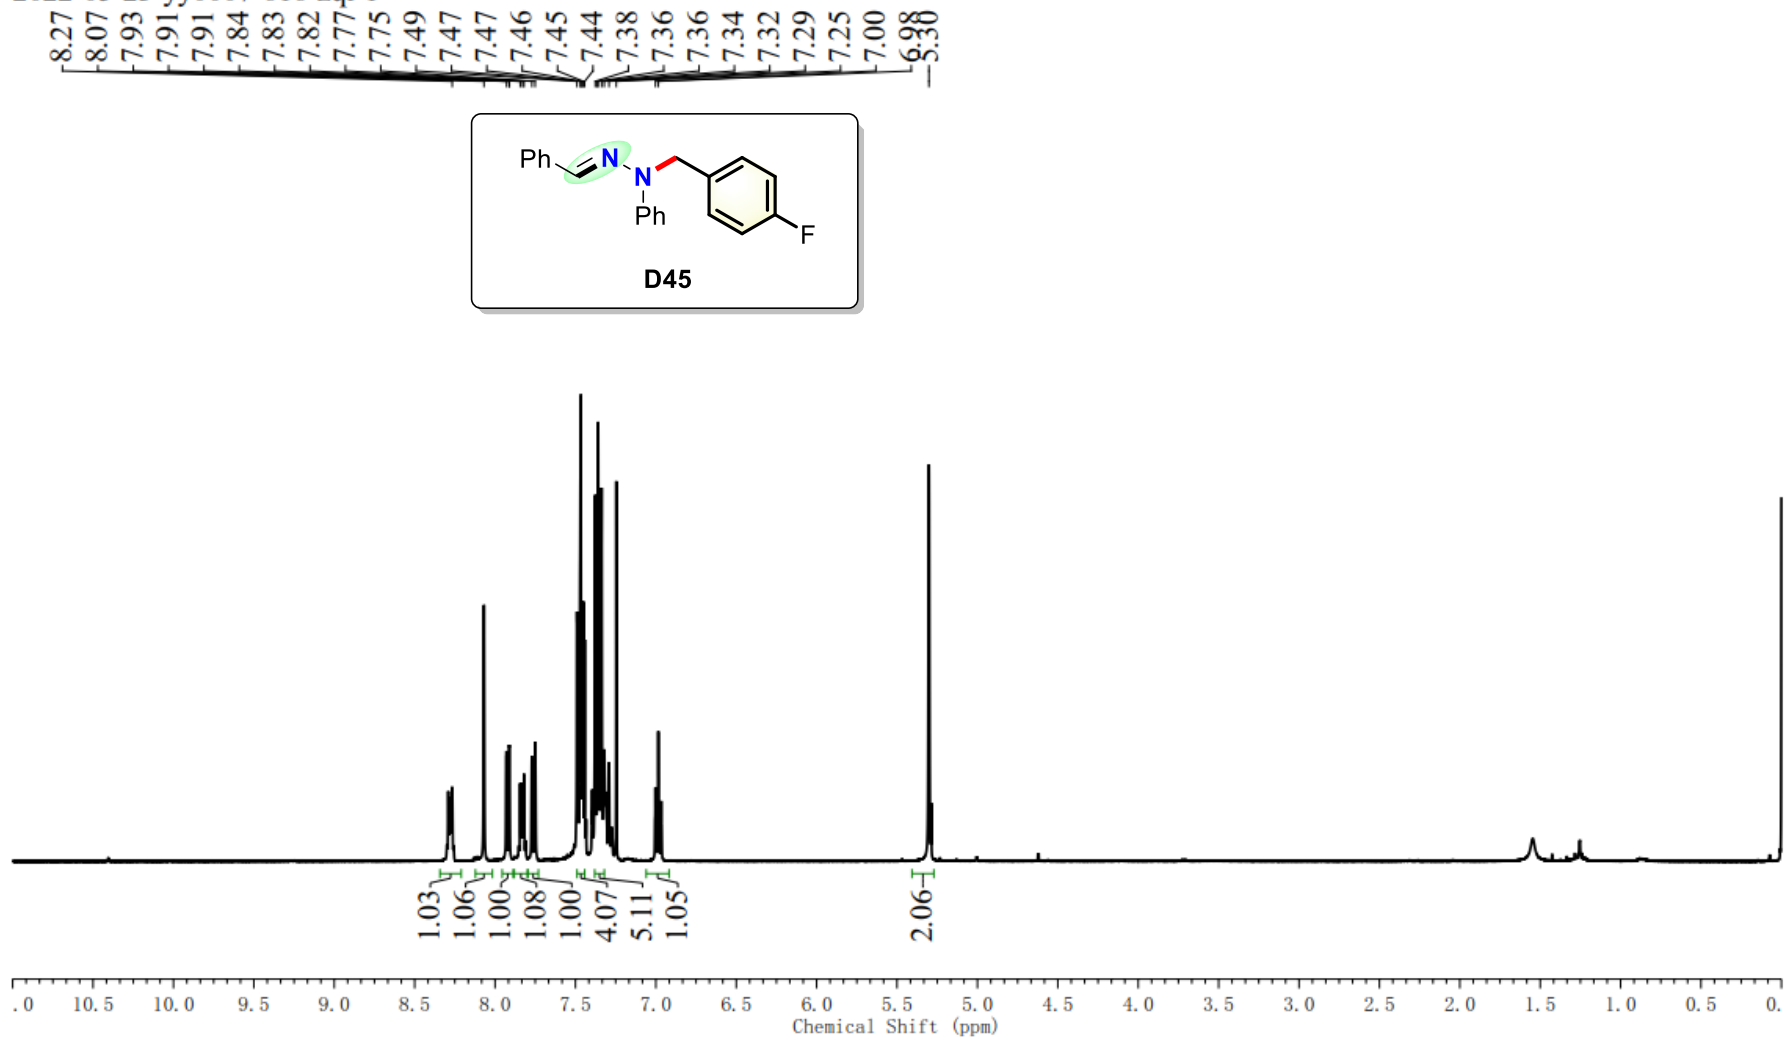

2022-05-26-YY0026-616-20220523-1

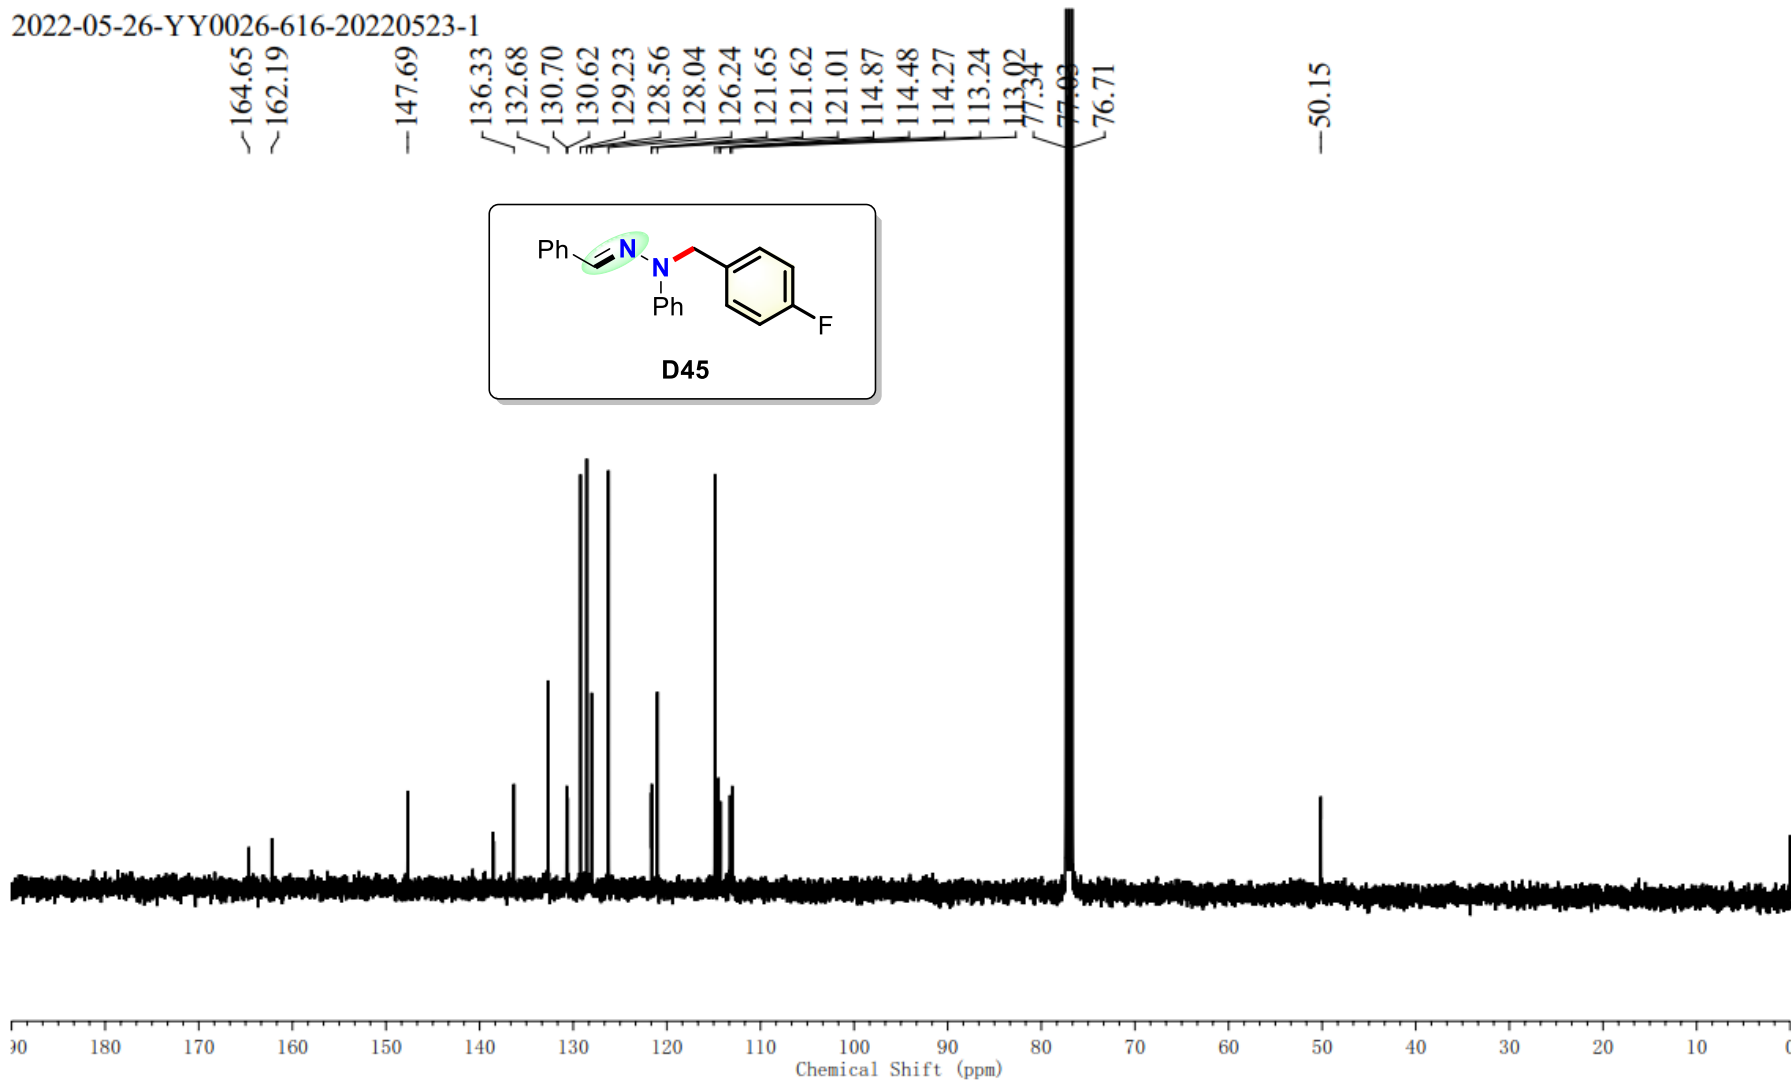



2022-05-30 YY0023 616-ZQI-20220523-1

--112.0987

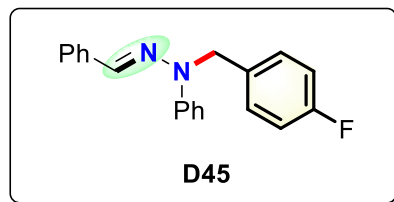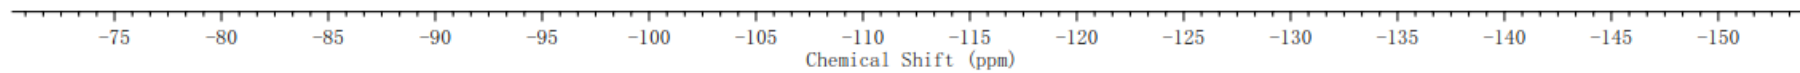

S233

2022-06-22 yy0025 61zql-01

7.6068  
7.6040  
7.5860  
7.3702  
7.3676  
7.3481  
7.3194  
7.3136  
7.3010  
7.2843  
7.2782  
7.2565  
7.2355  
7.2327  
7.2174  
7.1989  
7.1655  
7.1329  
7.1119  
6.9593  
6.9415  
6.9237  
5.0695

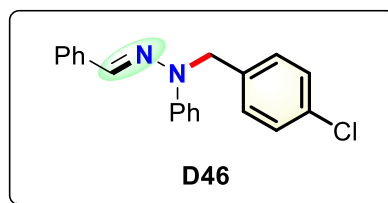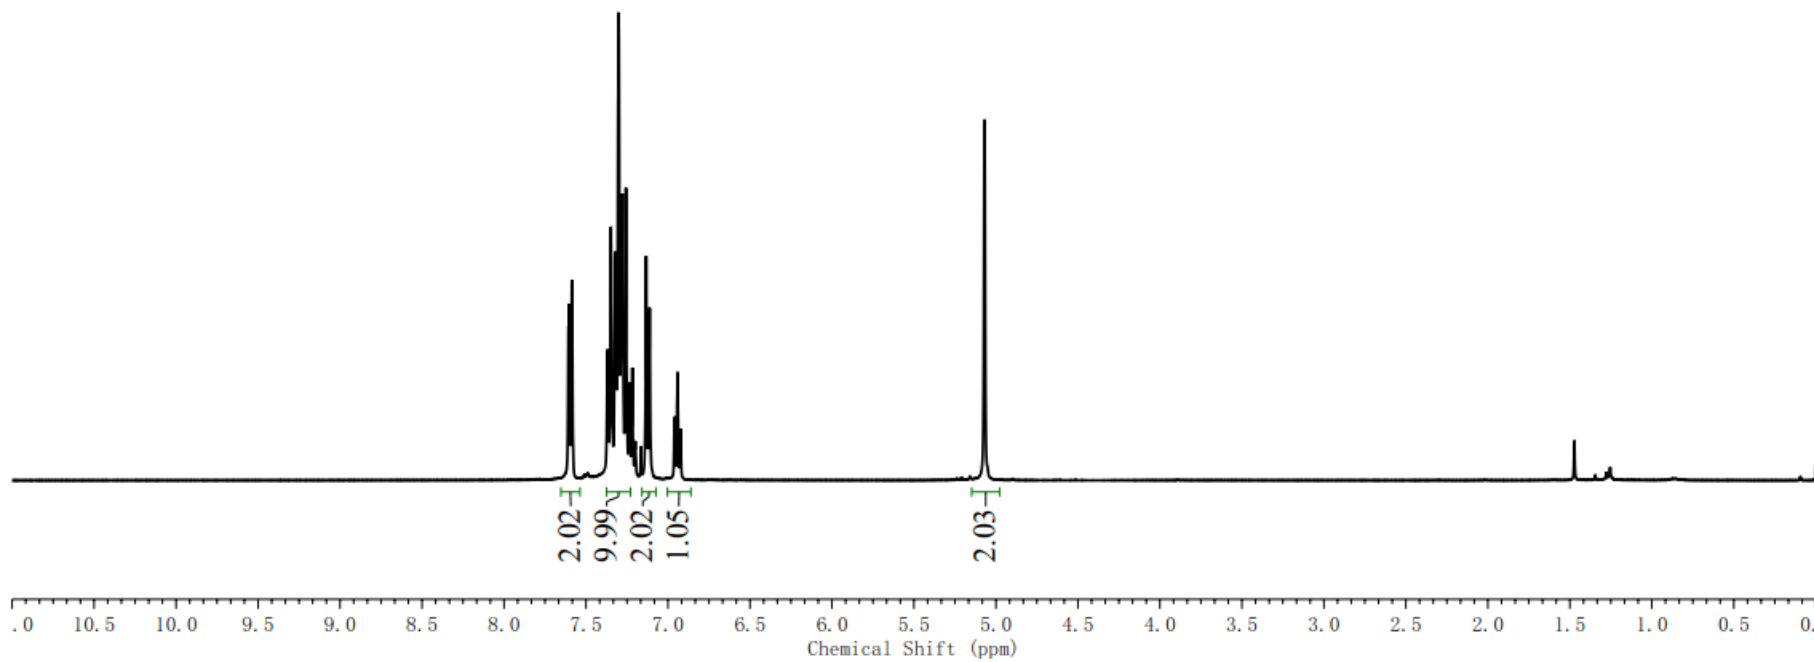

2022-06-24 yy0027 616-zql-1

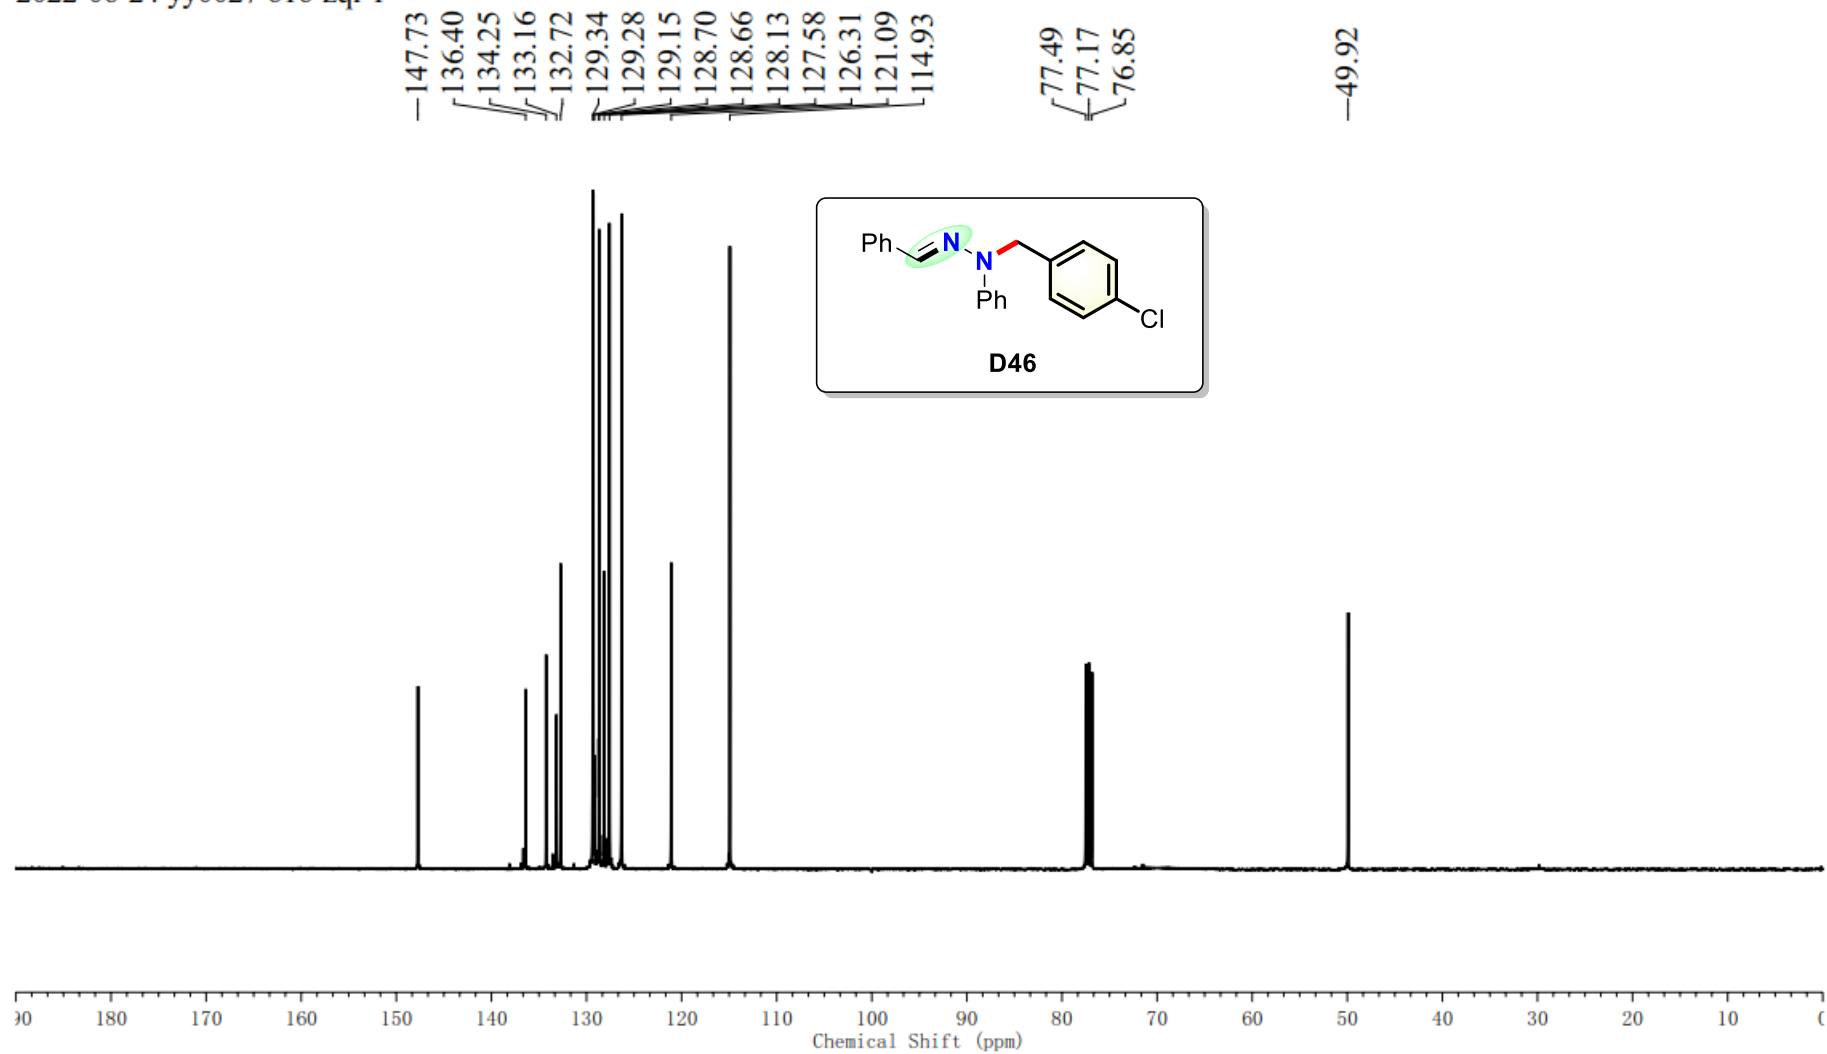

2022-07-02-yy0019-616-zql-2

7.6043  
7.6007  
7.5964  
7.5829  
7.5812  
7.4243  
7.4196  
7.4079  
7.4031  
7.3970  
7.3638  
7.3605  
7.3554  
7.3467  
7.3413  
7.3384  
7.3334  
7.3199  
7.3155  
7.3095  
7.3019  
7.2979  
7.2917  
7.2825  
7.2780  
7.2755  
7.2362  
7.2330  
7.2298  
7.2198  
7.2145  
7.1964  
7.1578  
7.0707  
7.0494  
6.9562  
6.9415  
6.9385  
6.9356  
6.9208

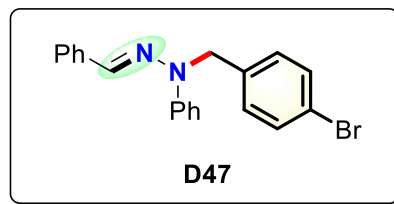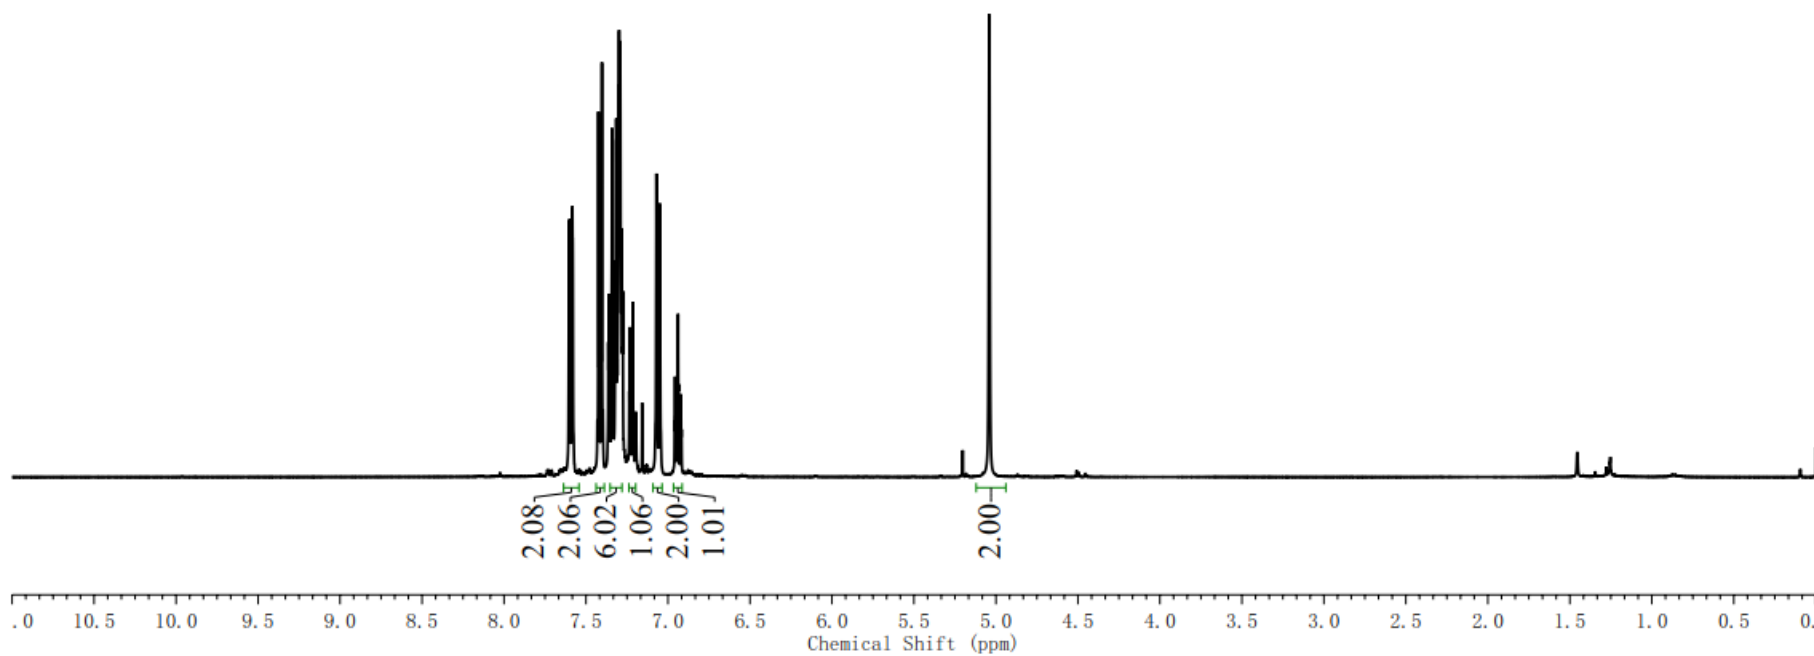

2022-7-4 yy0047-616-zql-3

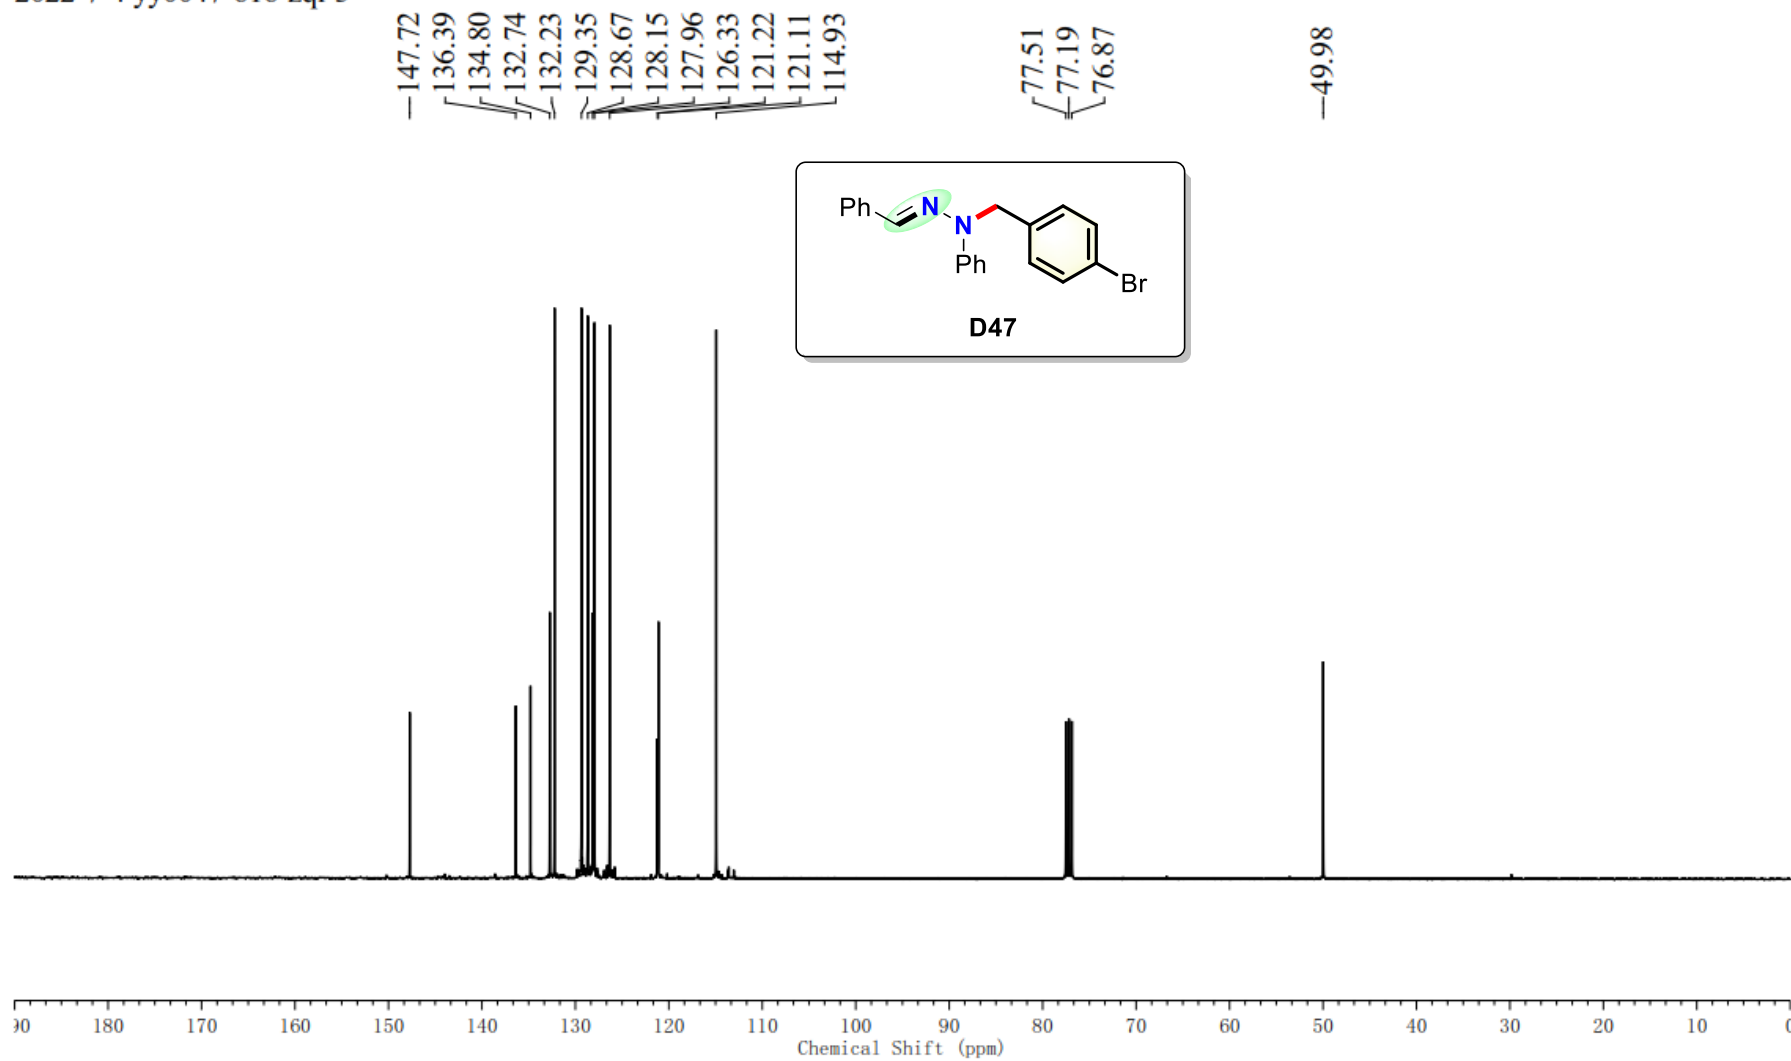

S237

2022-05-28-yy0007-616-zql-5

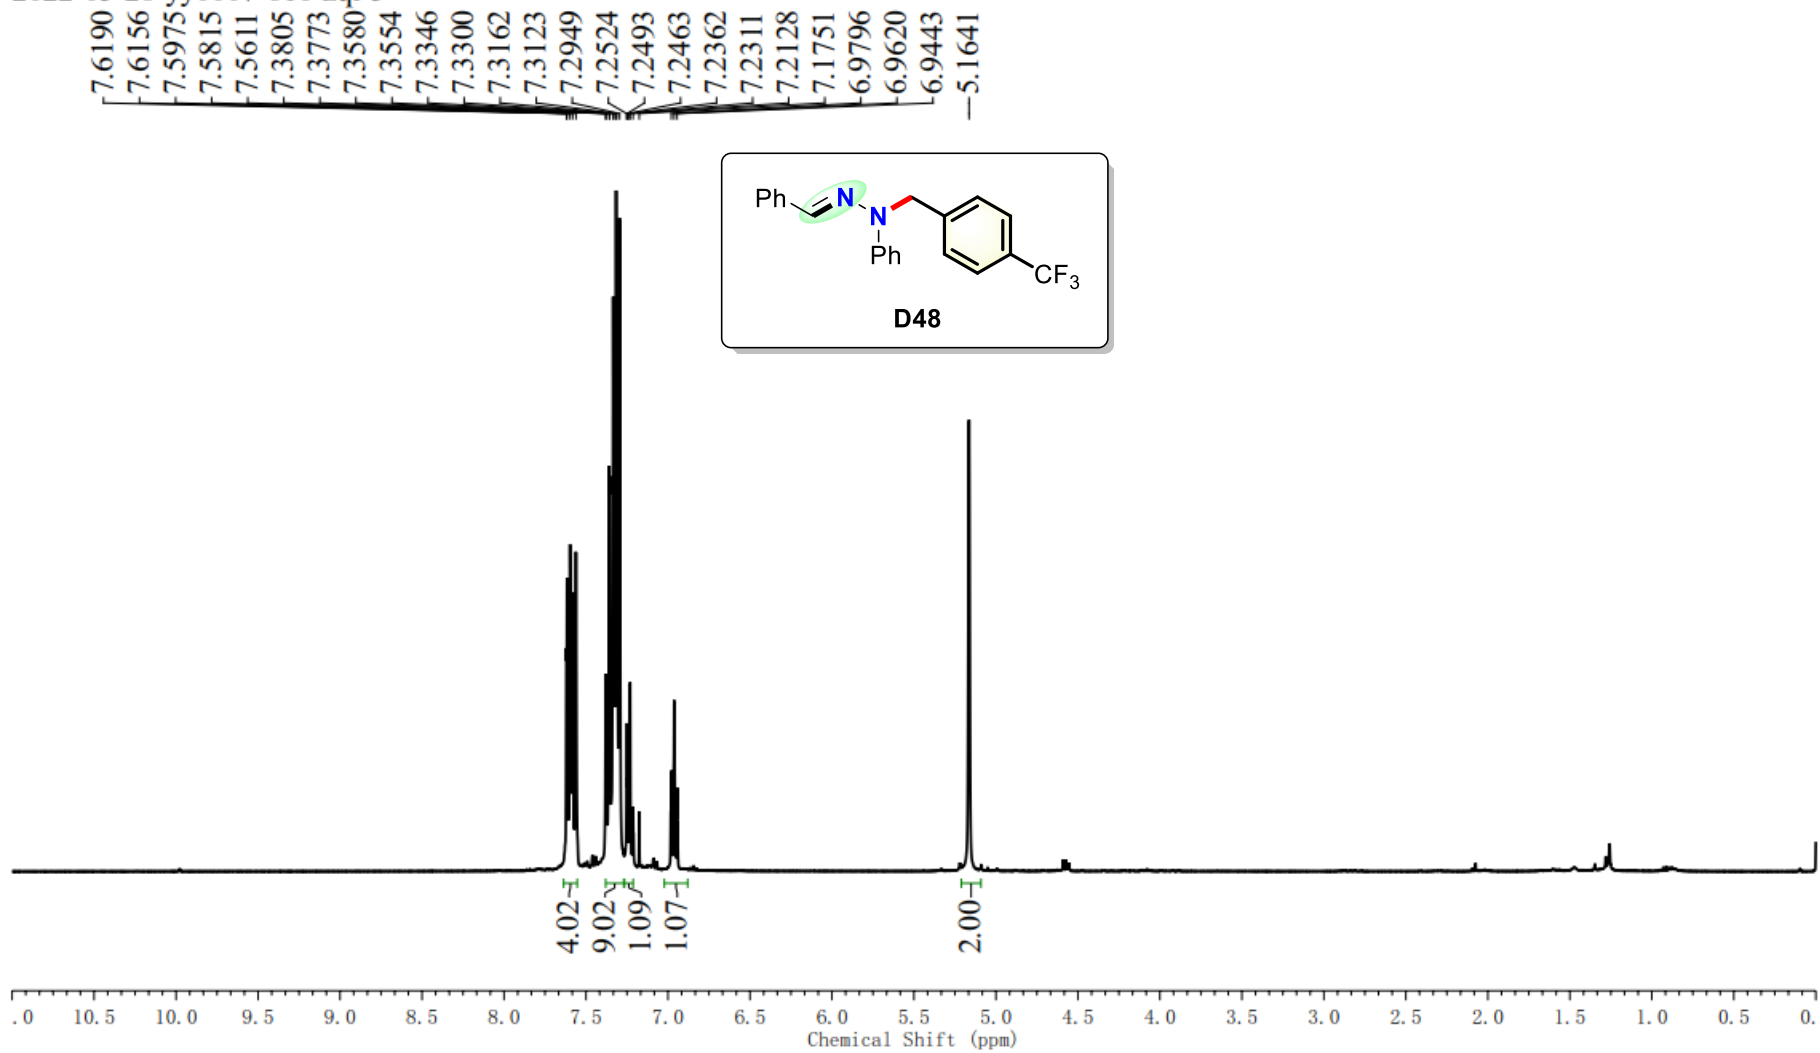

2022-05-30 YY0021 616-ZQL-0527-5

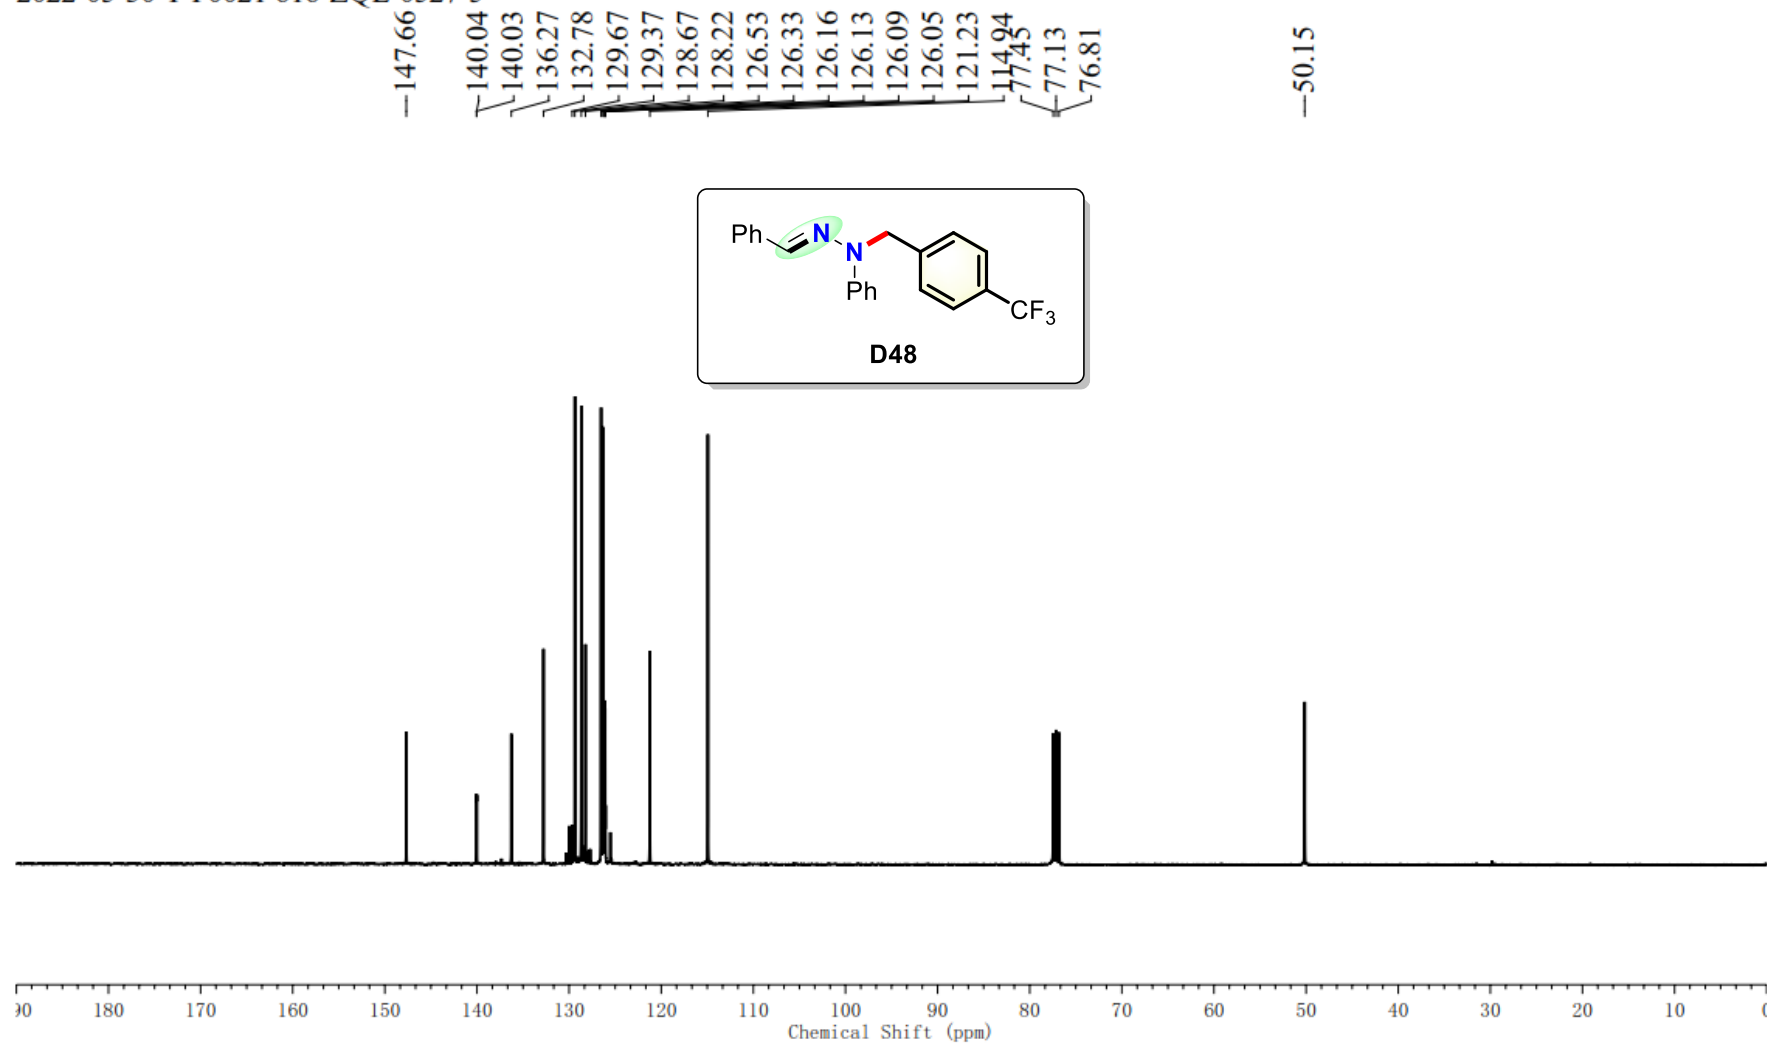

2022-05-23-yy0007-616-zql-4

7.6380  
7.6198  
7.3975  
7.3781  
7.3757  
7.3598  
7.3515  
7.3457  
7.3339  
7.3297  
7.3224  
7.3171  
7.3119  
7.2768  
7.2534  
7.2377  
7.1977  
7.1770  
6.9914  
6.9737  
6.9559  
-5.1786

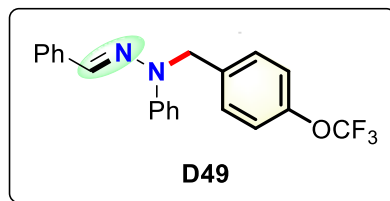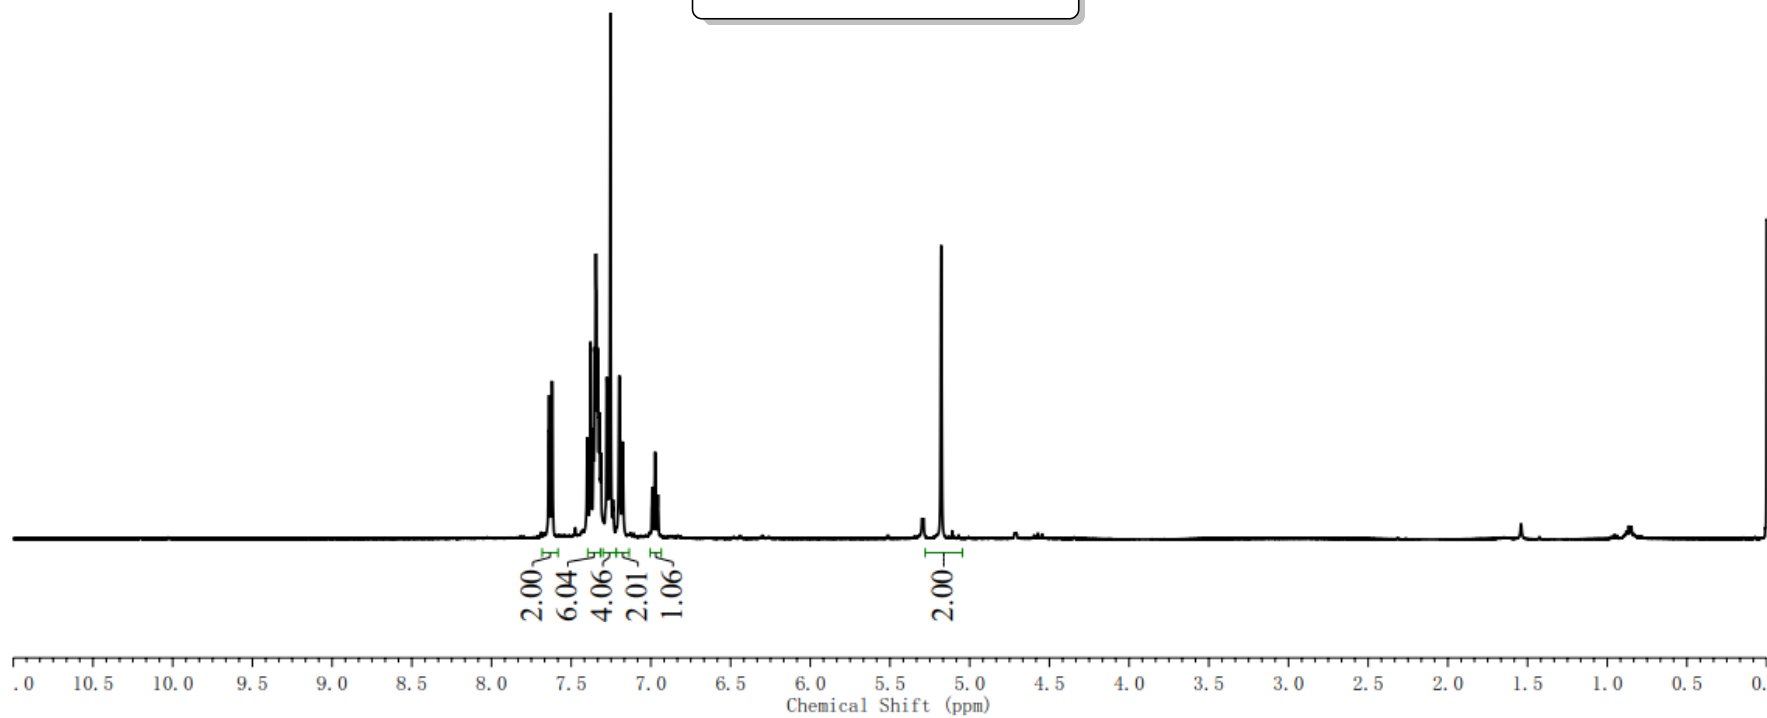



2022-05-26-YY0026-616-20220523-4

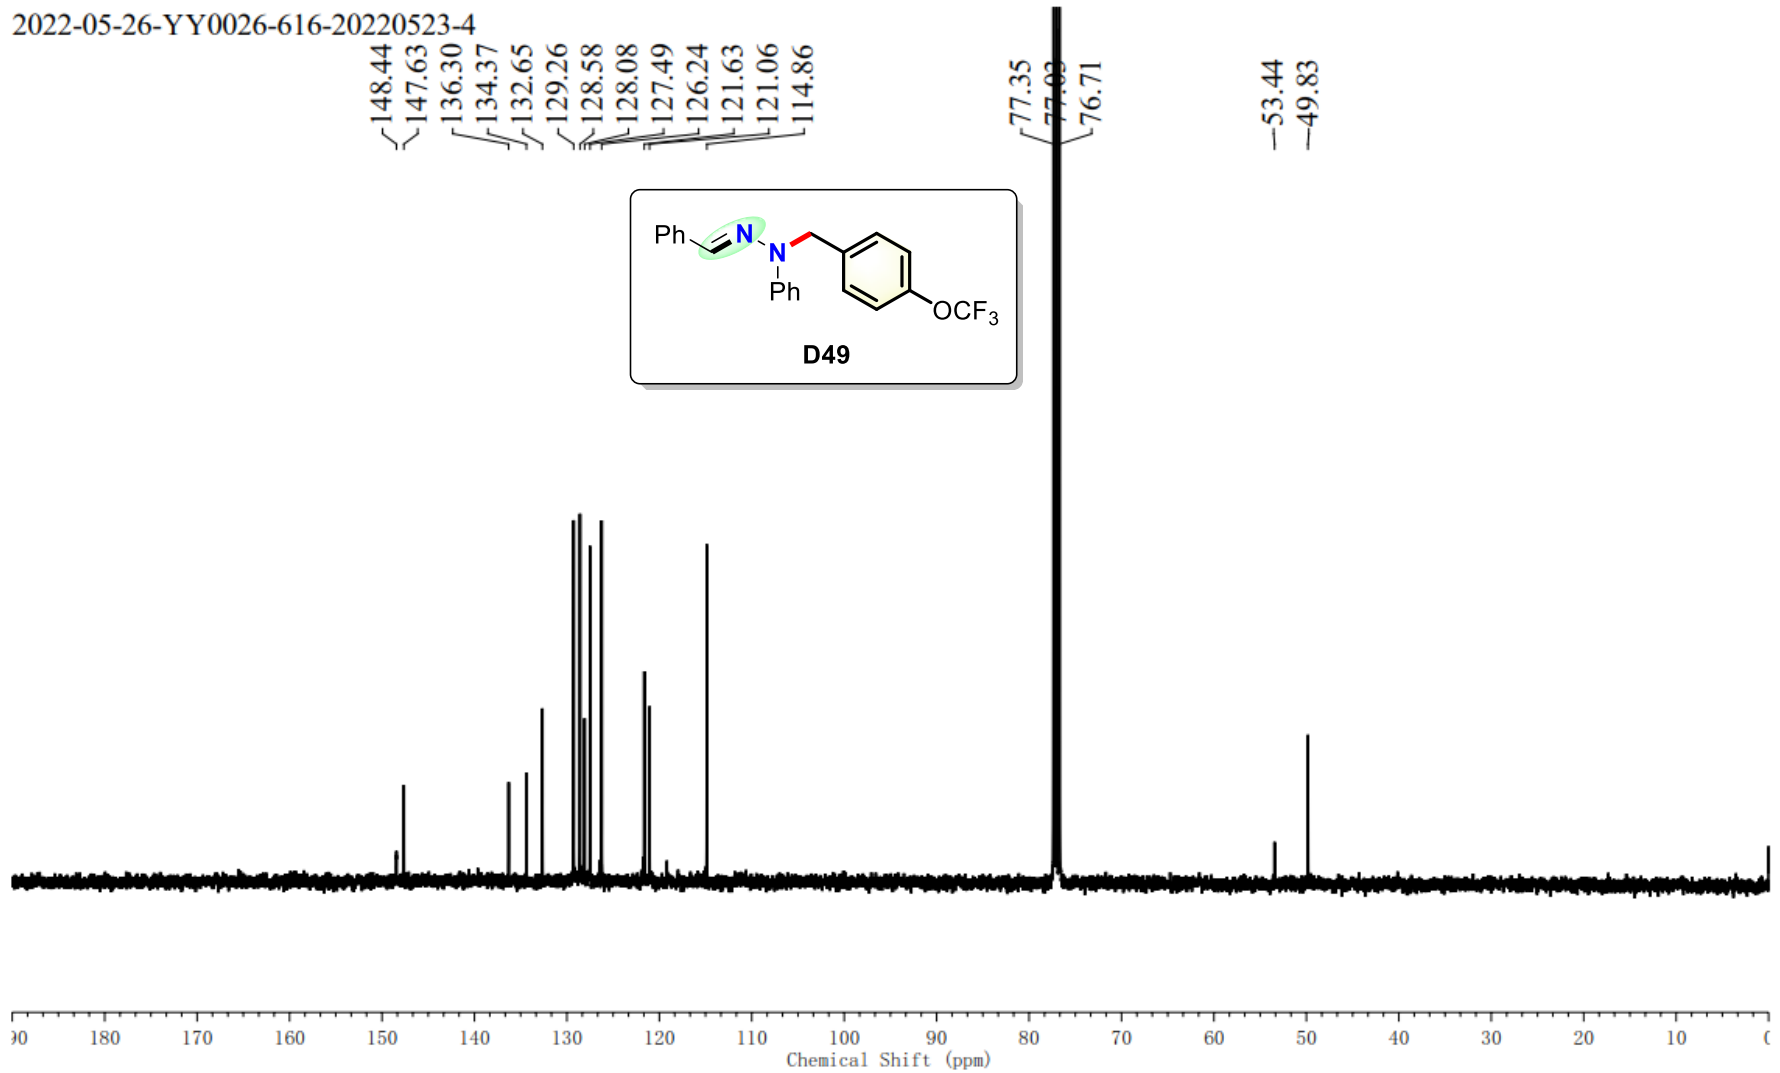

2022-9-31 yy0060-616-lqq-d3

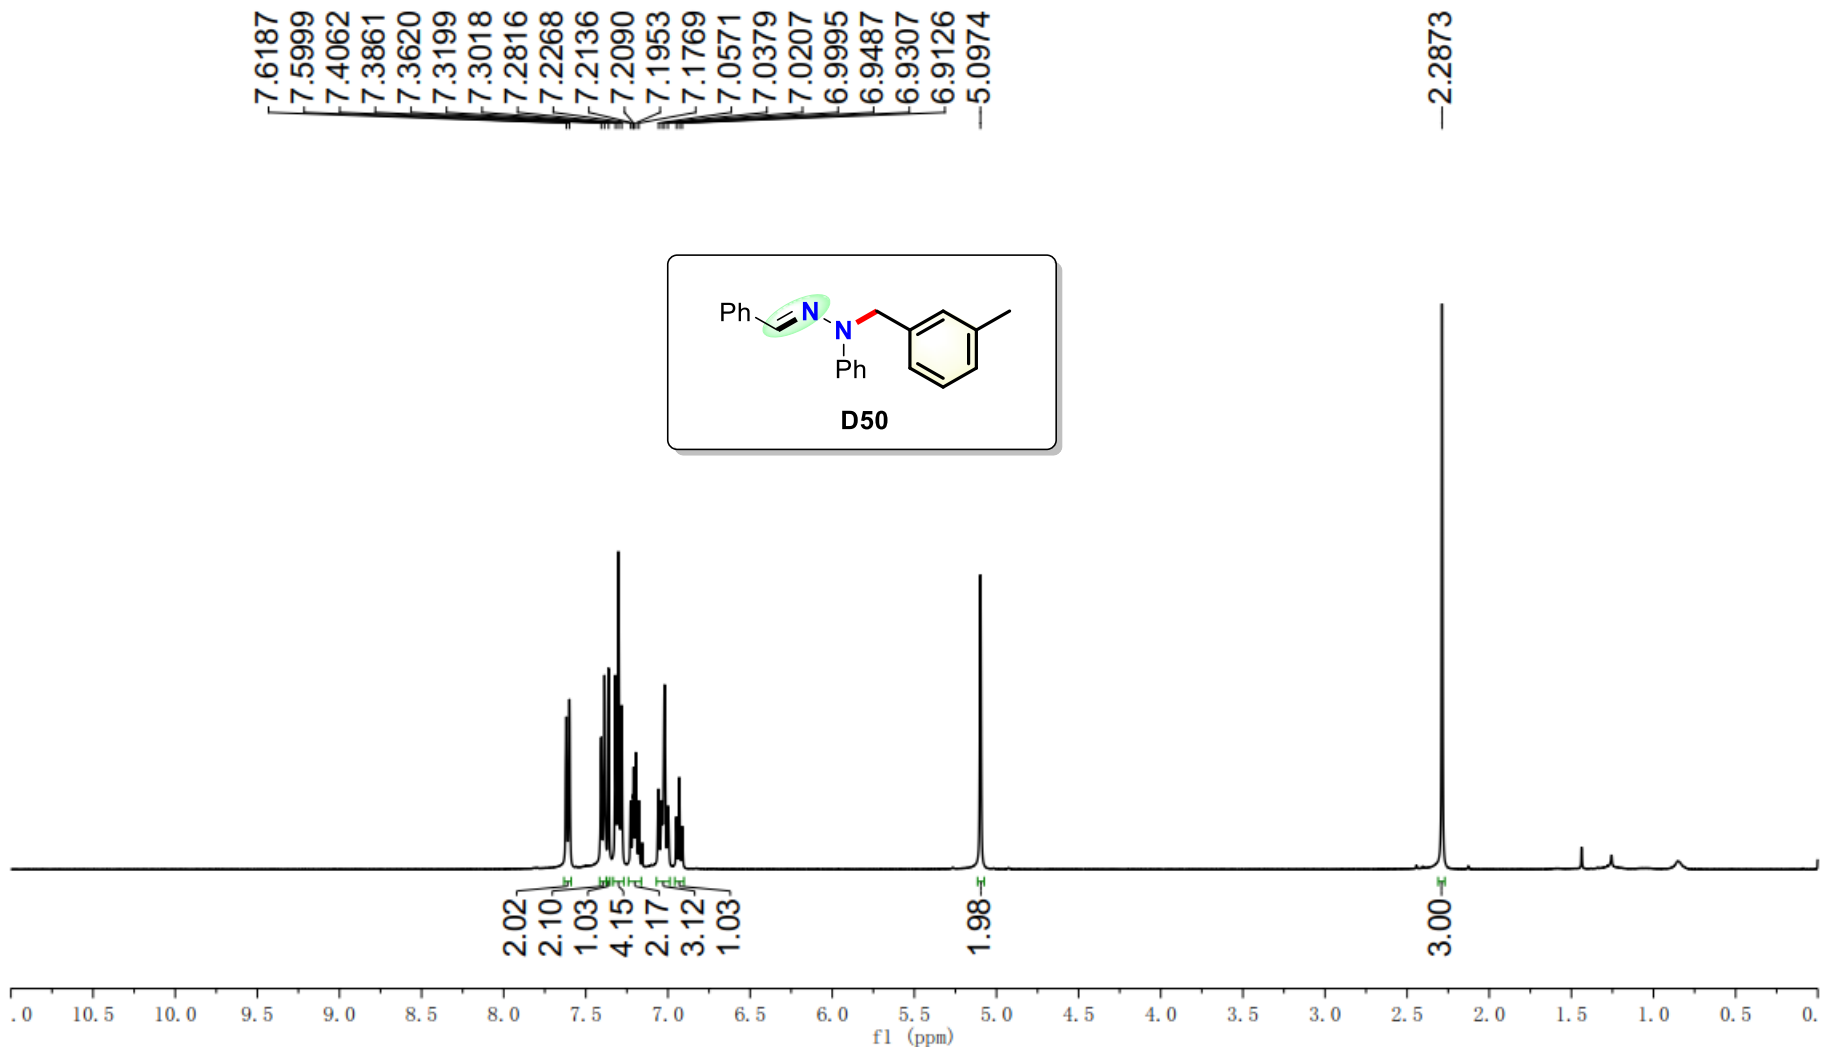

S242

2022-09-30 yy0006 616-lqq-D3

148.17  
139.00  
136.83  
135.92  
132.65  
129.39  
129.14  
128.74  
128.32  
128.06  
126.77  
126.44  
123.32  
120.93  
115.02

50.75

21.73

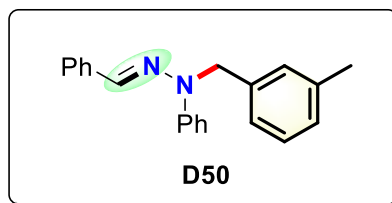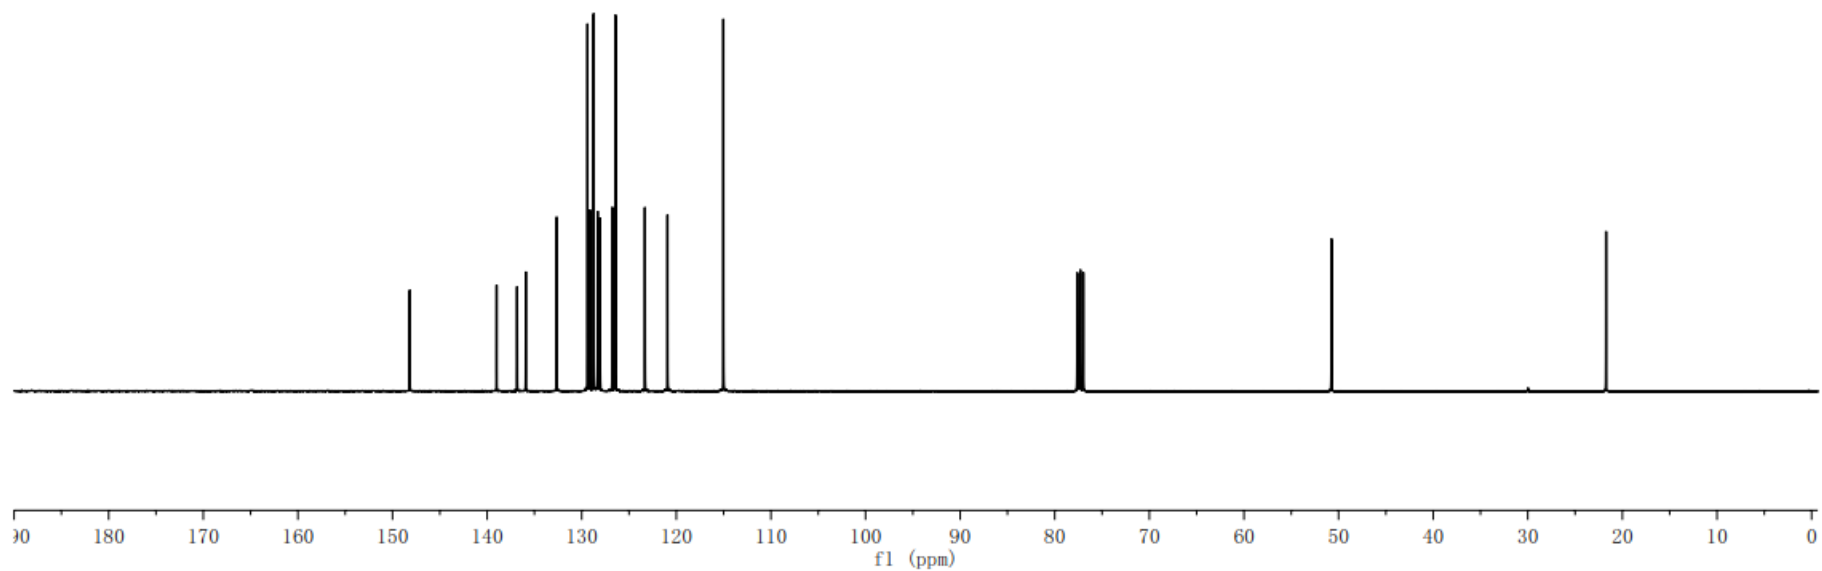

S243

2022-11-24 YY0014 616-lqq-D6

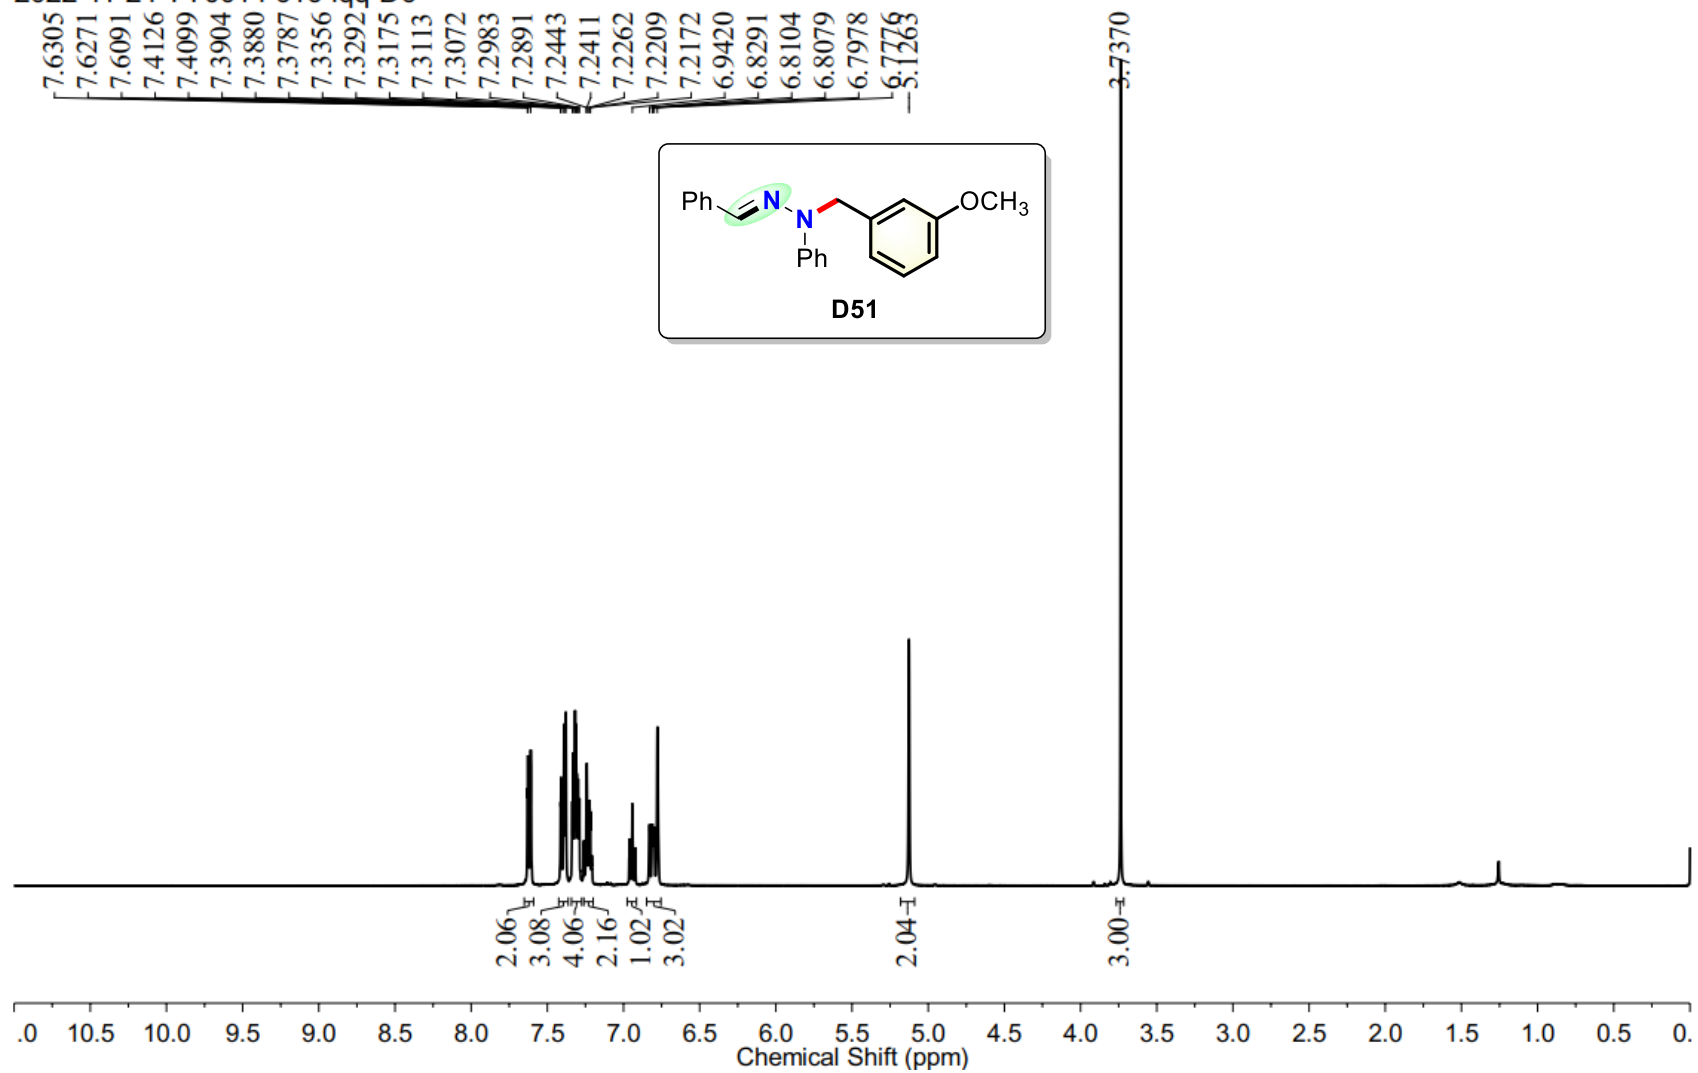

2022-11-30-yy0010-616-d6

160.29  
147.95  
137.54  
136.57  
132.59  
130.16  
129.20  
128.56  
127.92  
126.26  
120.82  
118.30  
114.89  
112.58  
111.72

55.27  
50.63

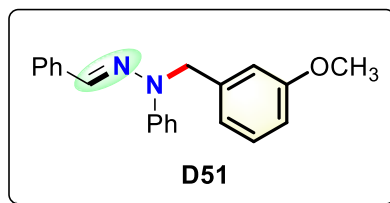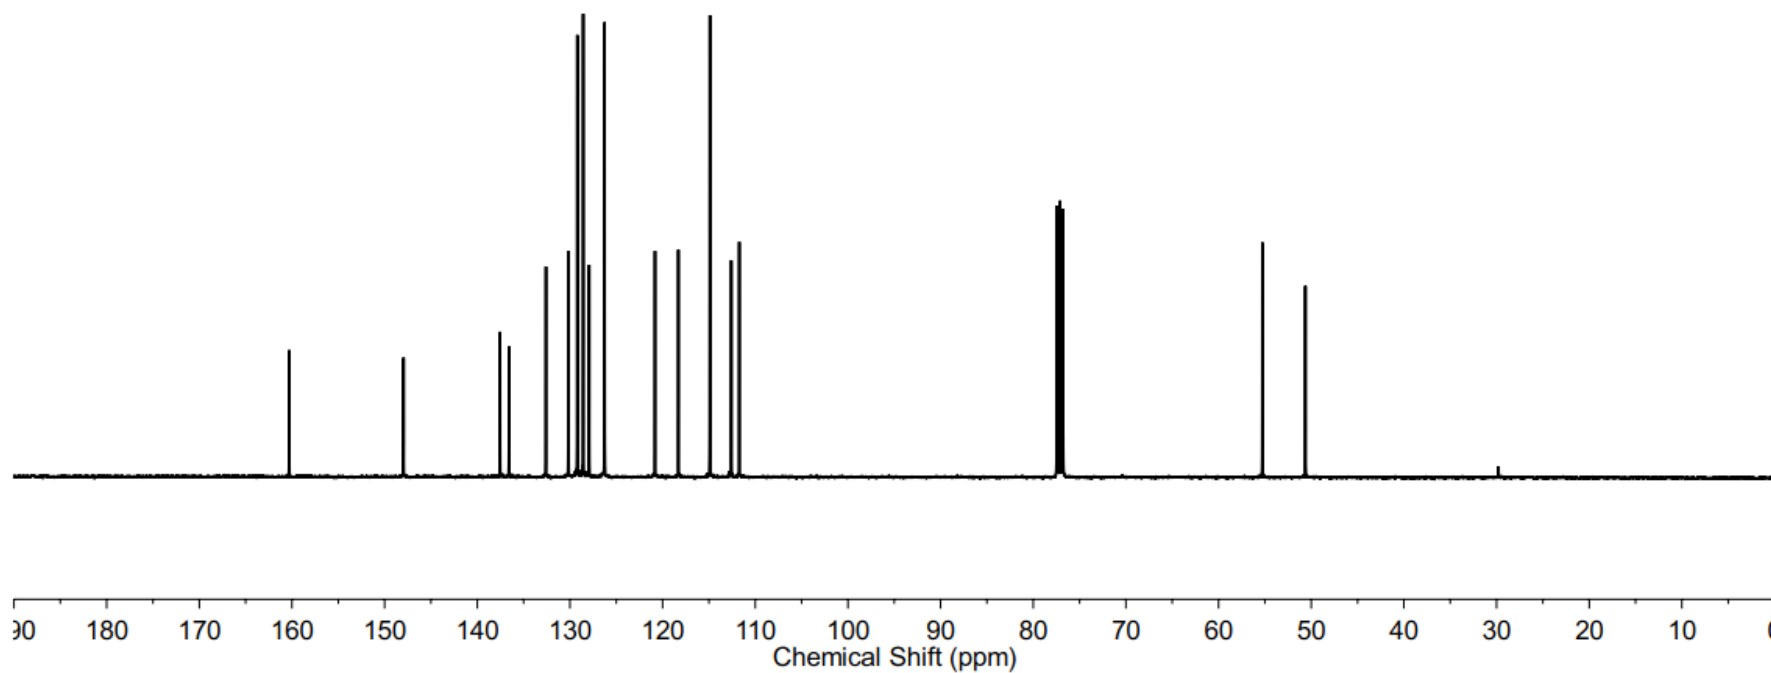

2022-07-02-yy0019-616-zql-1

7.6095  
7.6060  
7.5880  
7.3782  
7.3753  
7.3559  
7.3534  
7.3166  
7.3102  
7.2967  
7.2768  
7.2292  
7.2260  
7.2225  
7.2075  
6.9775  
6.9582  
6.9557  
6.9377  
6.9351  
6.9230  
6.9197  
6.9108  
6.9029  
6.8943  
6.8895  
5.0659

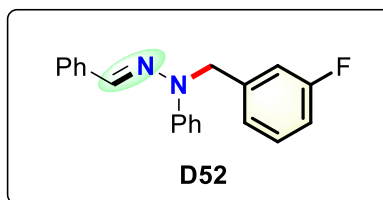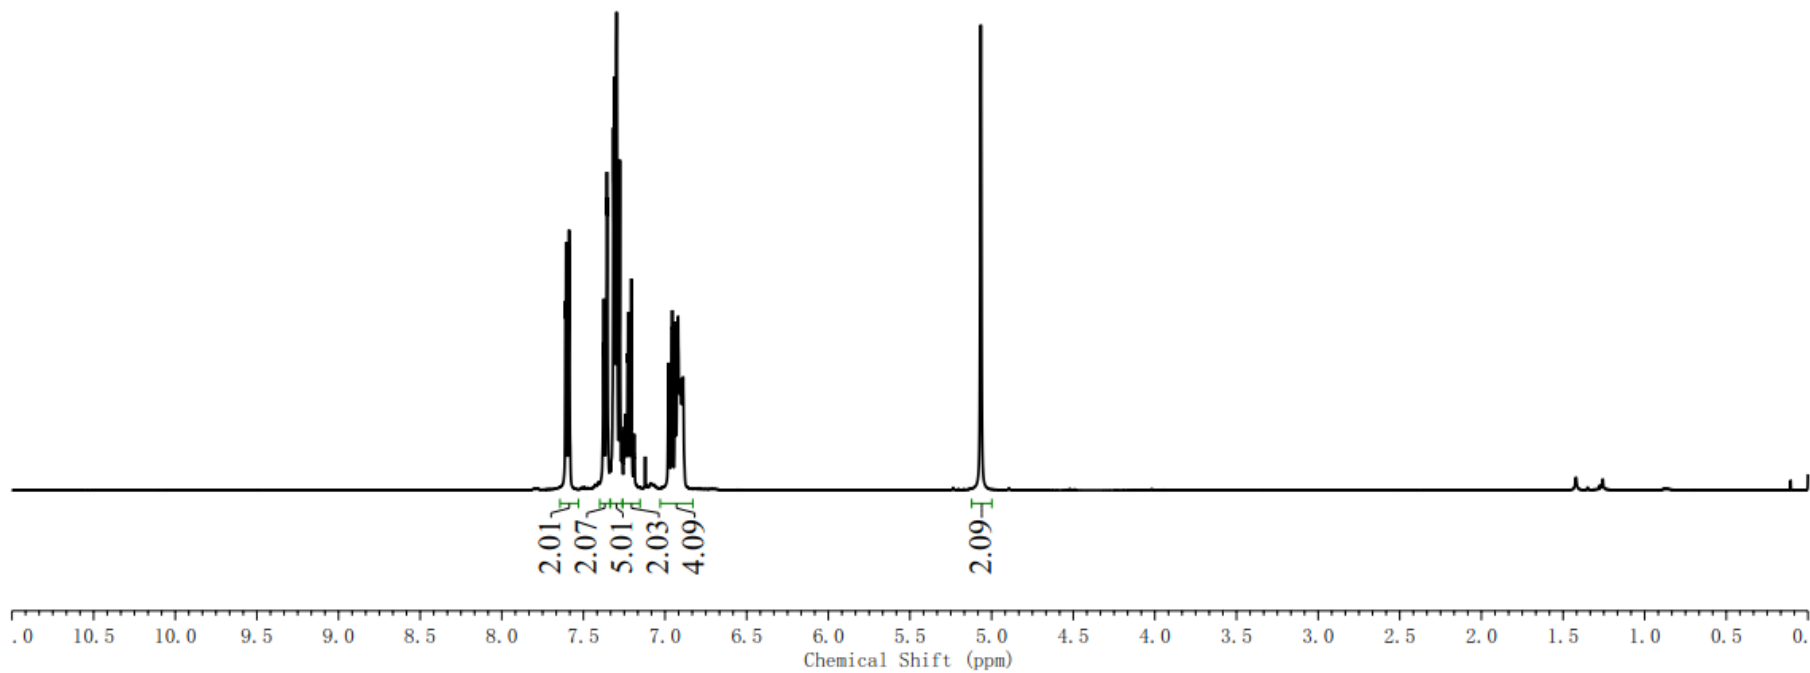

2022-7-4 yy0046-616-zql-2

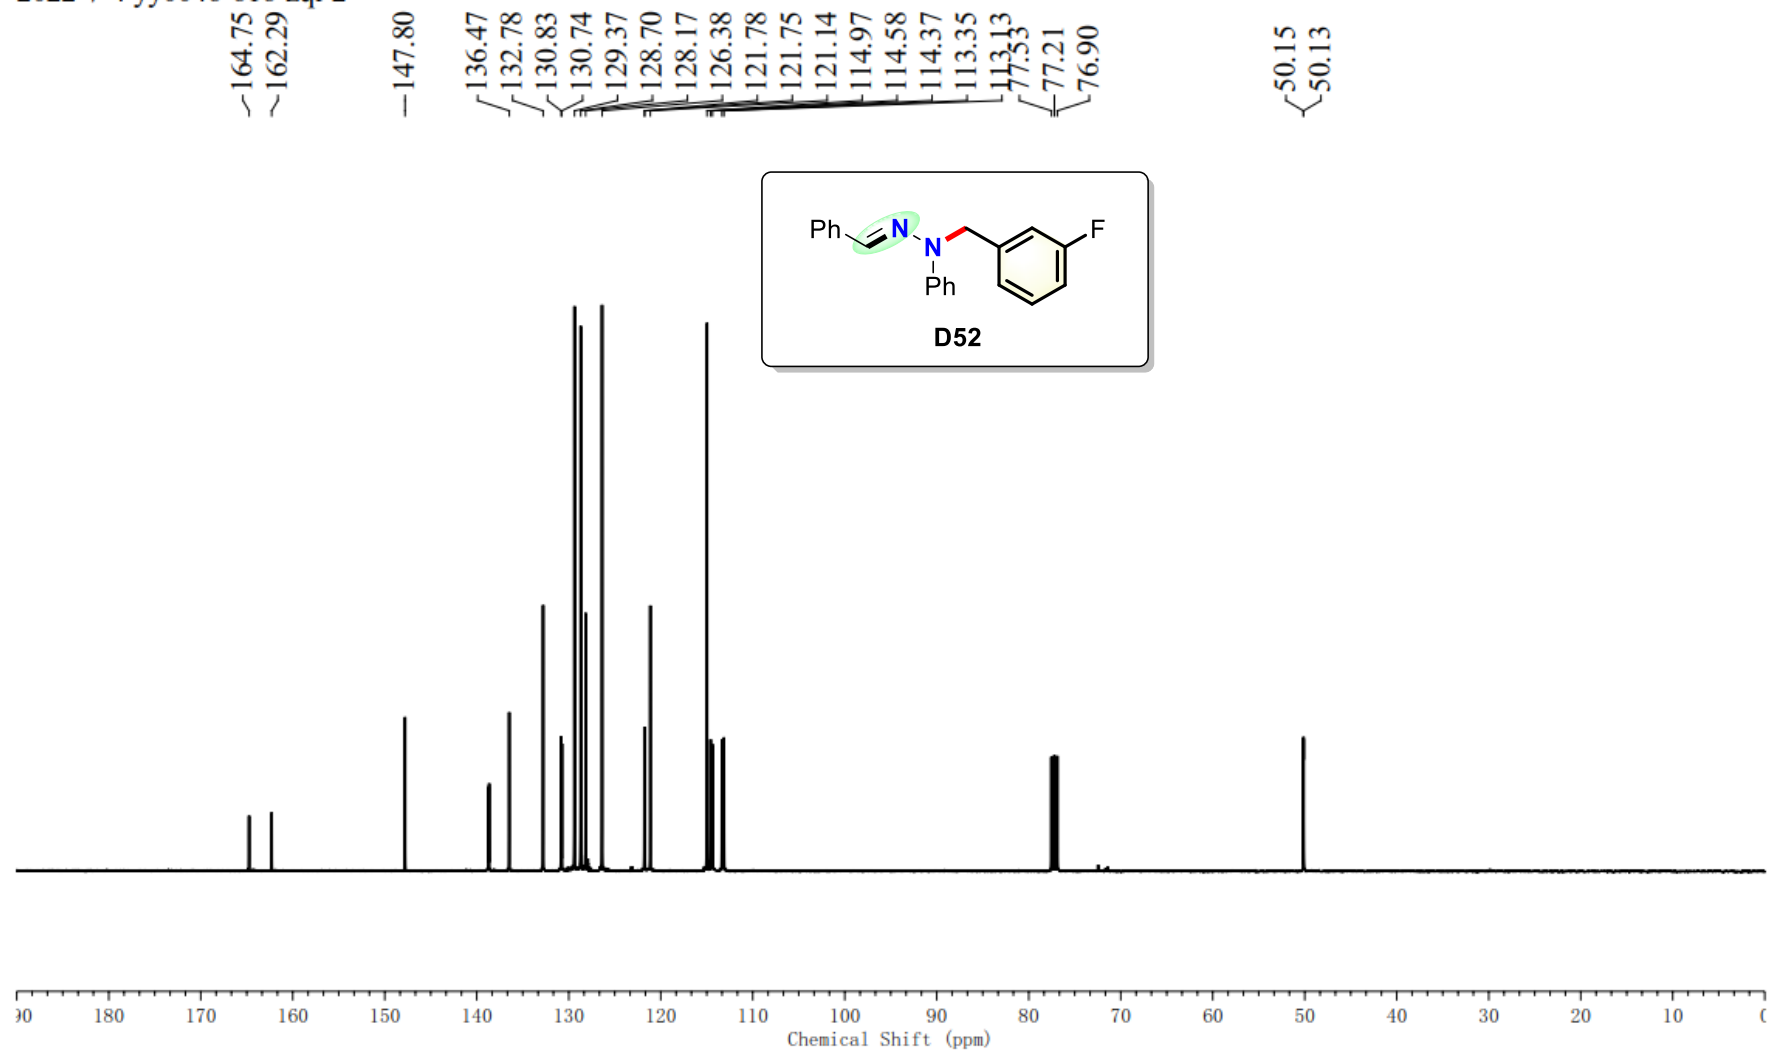

2022-6-13 YY0018-616-ZQL-13-1

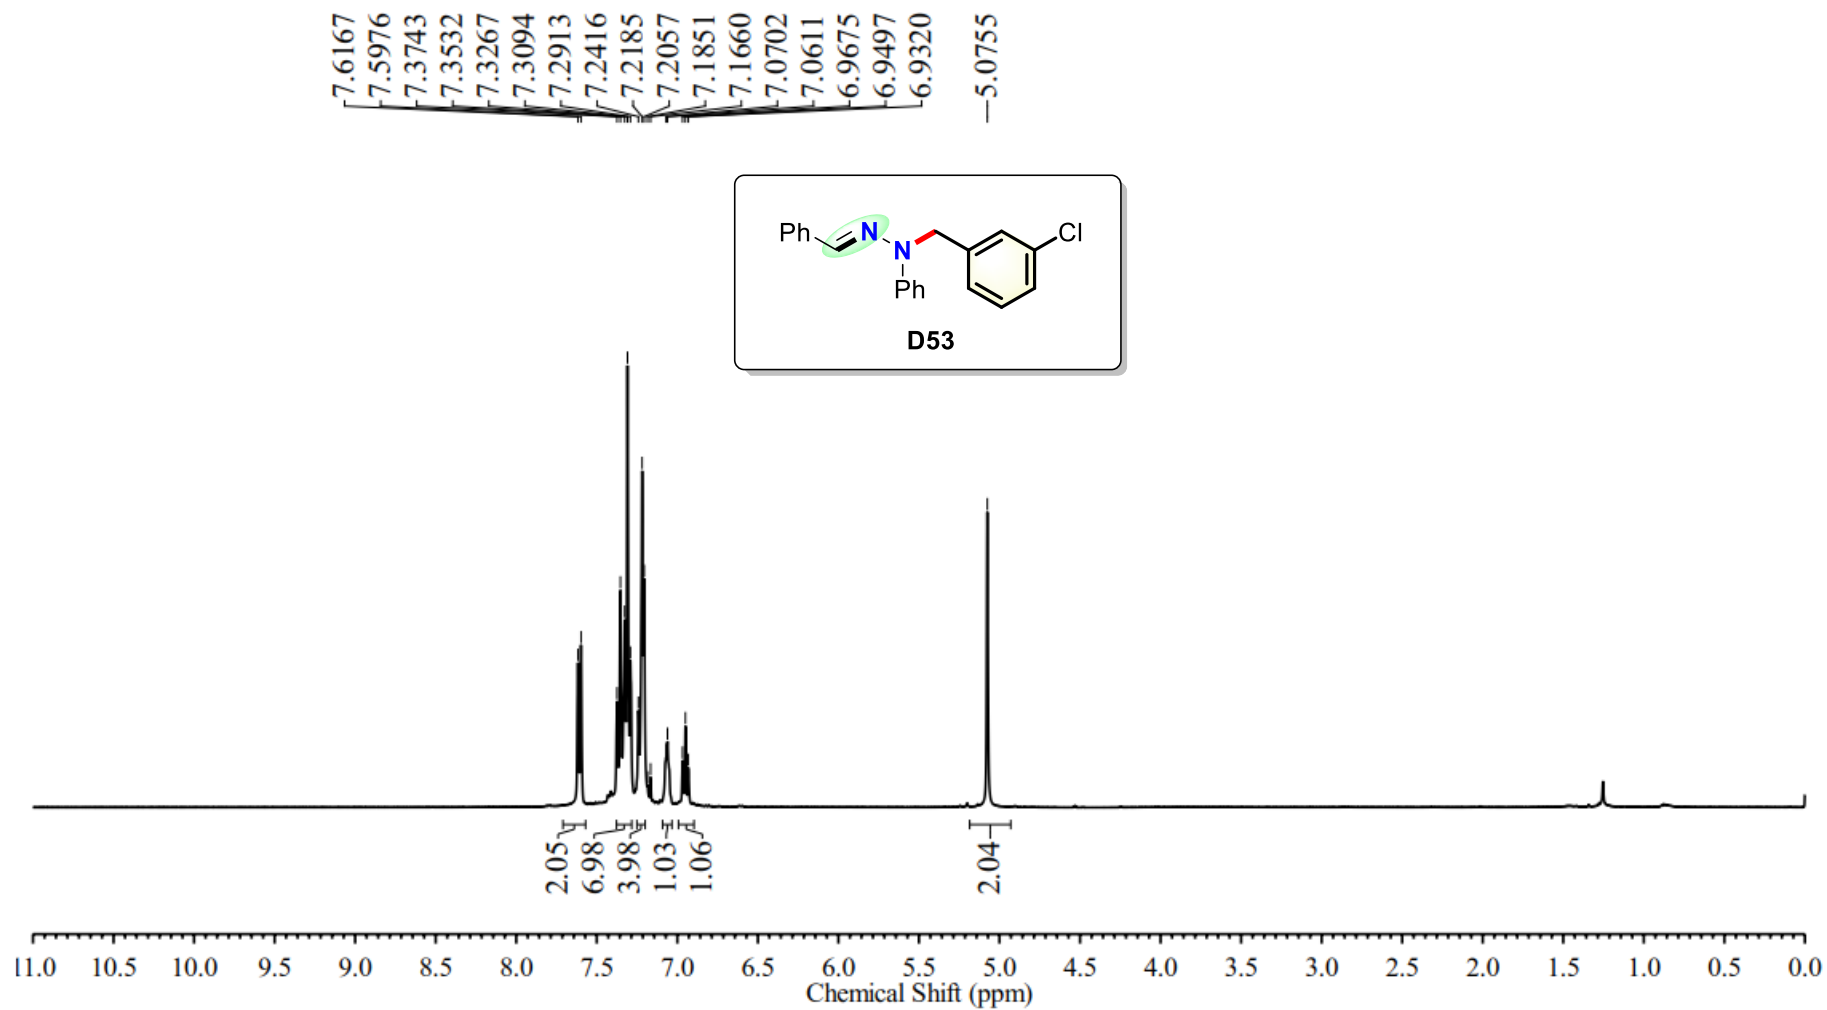



2022-6-16 yy0005-616-zql-613-1

147.7425  
138.0737  
136.3904  
135.1138  
132.7456  
130.4477  
129.3435  
128.6566  
128.1467  
127.7420  
126.3505  
126.2490  
124.2994  
121.1322  
114.9449  
77.4823  
77.1647  
76.8469  
50.1438

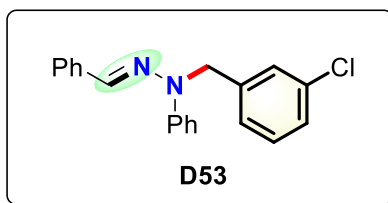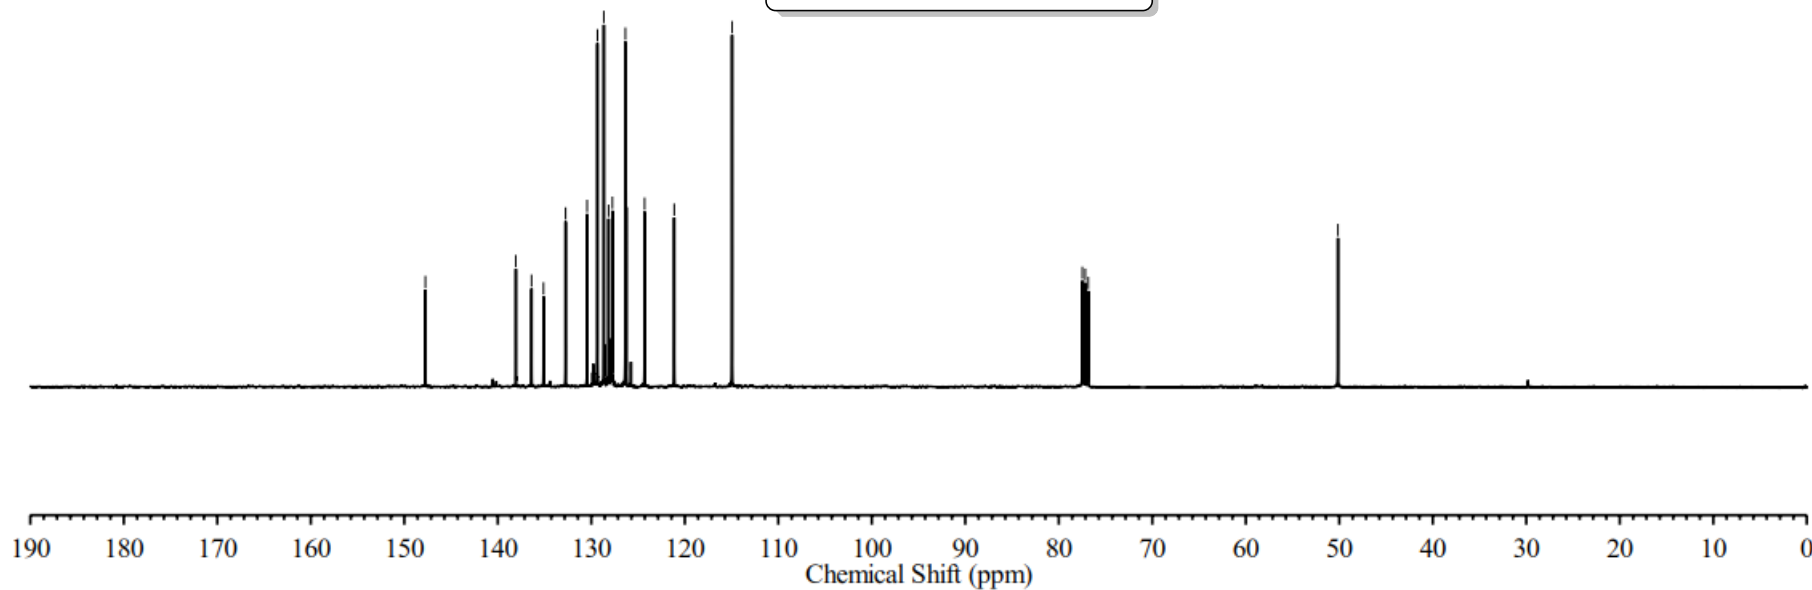

2022-05-28-yy0007-616-zql-1

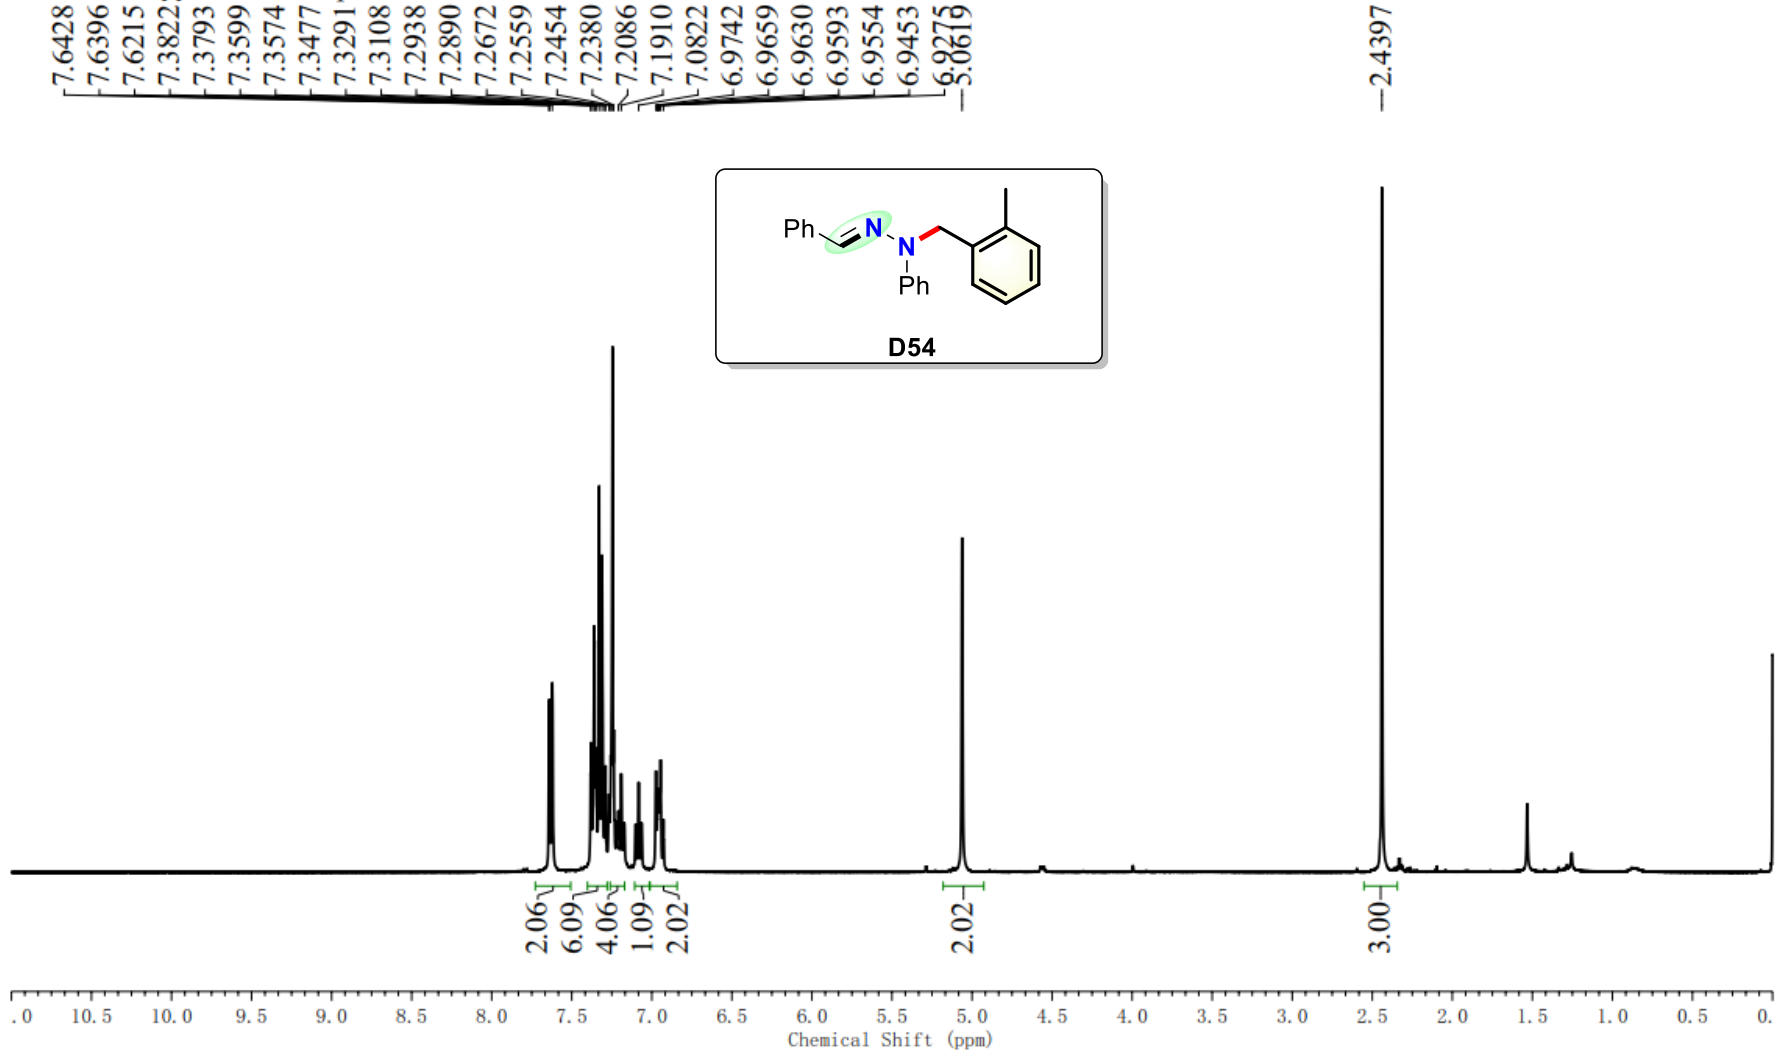

2022-05-30 YY0022 616-ZQL-0527-1

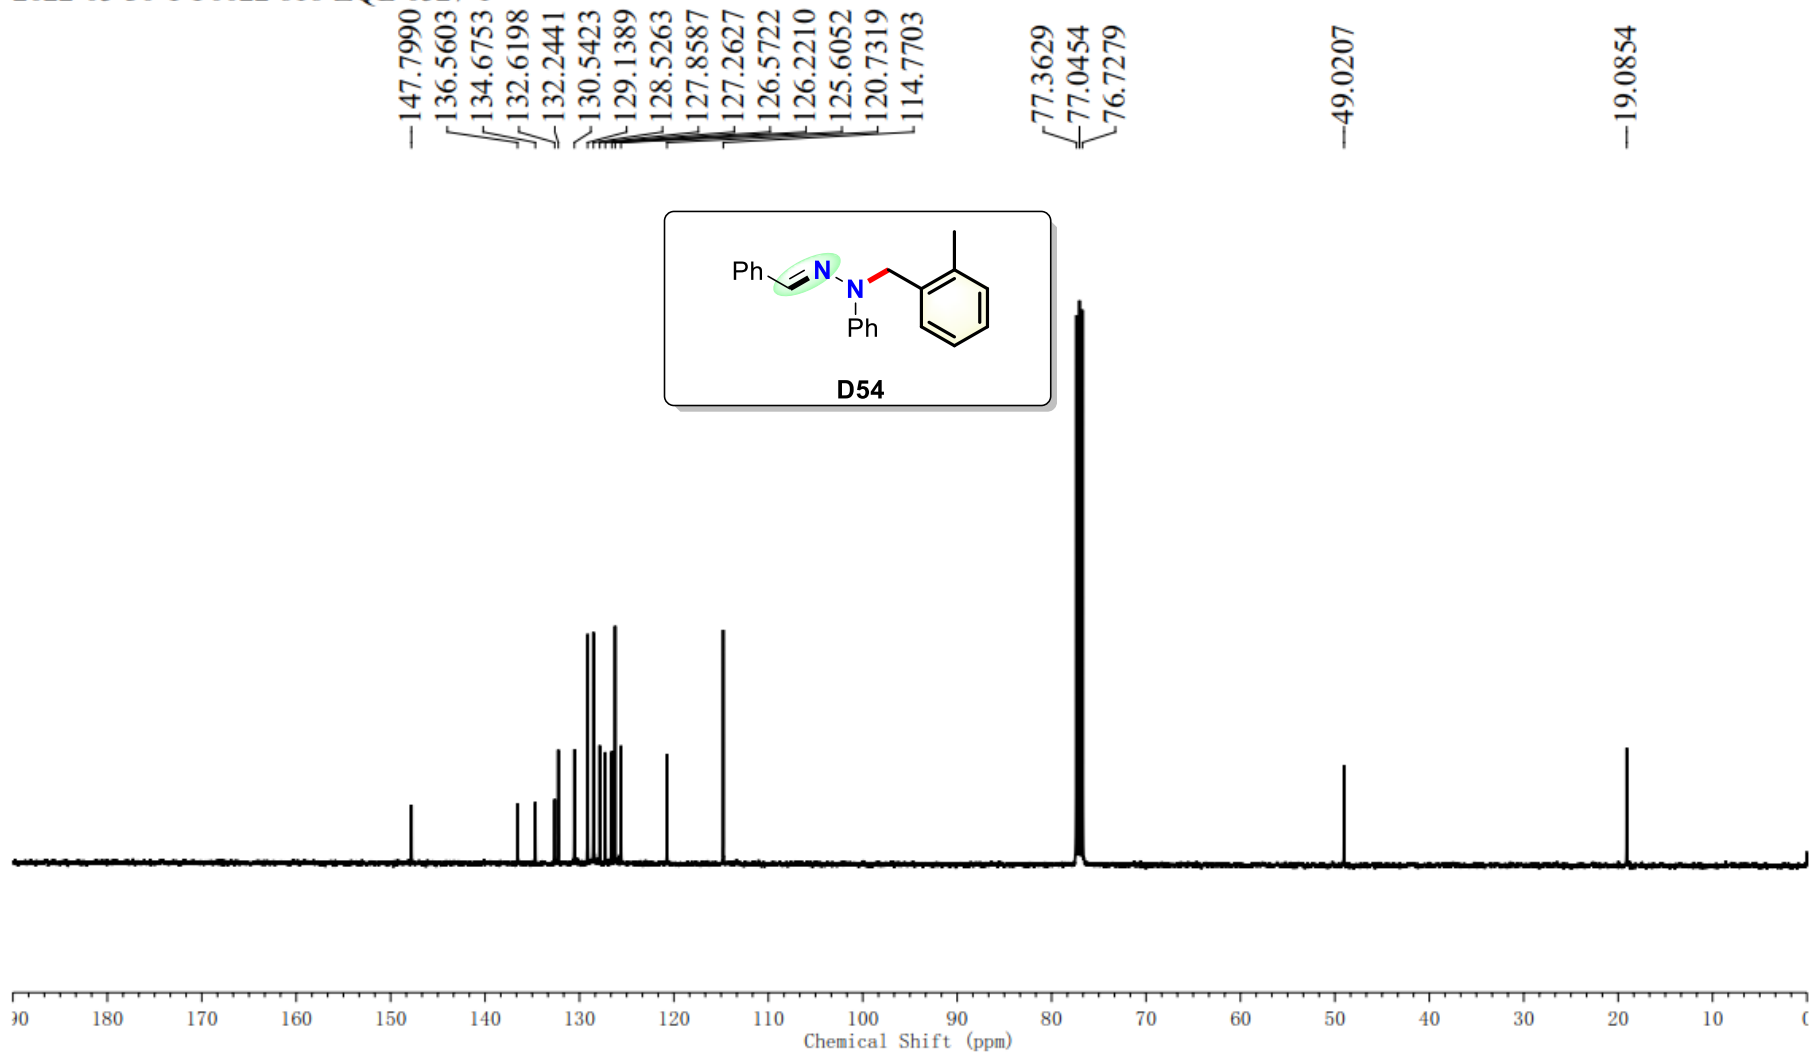

2022-07-02-yy0019-616-zql-3

7.6100  
7.6067  
7.5886  
7.3774  
7.3577  
7.3055  
7.2854  
7.2652  
7.2117  
7.2089  
7.1979  
7.1933  
7.1888  
7.1751  
7.1060  
7.0830  
7.0621  
6.9901  
6.9865  
6.9719  
6.9674  
6.9601  
6.9578  
6.9402  
6.9222  
6.9042  
5.1464

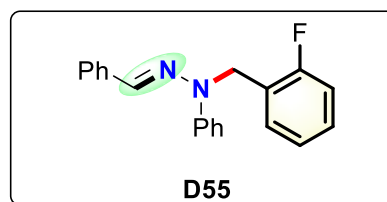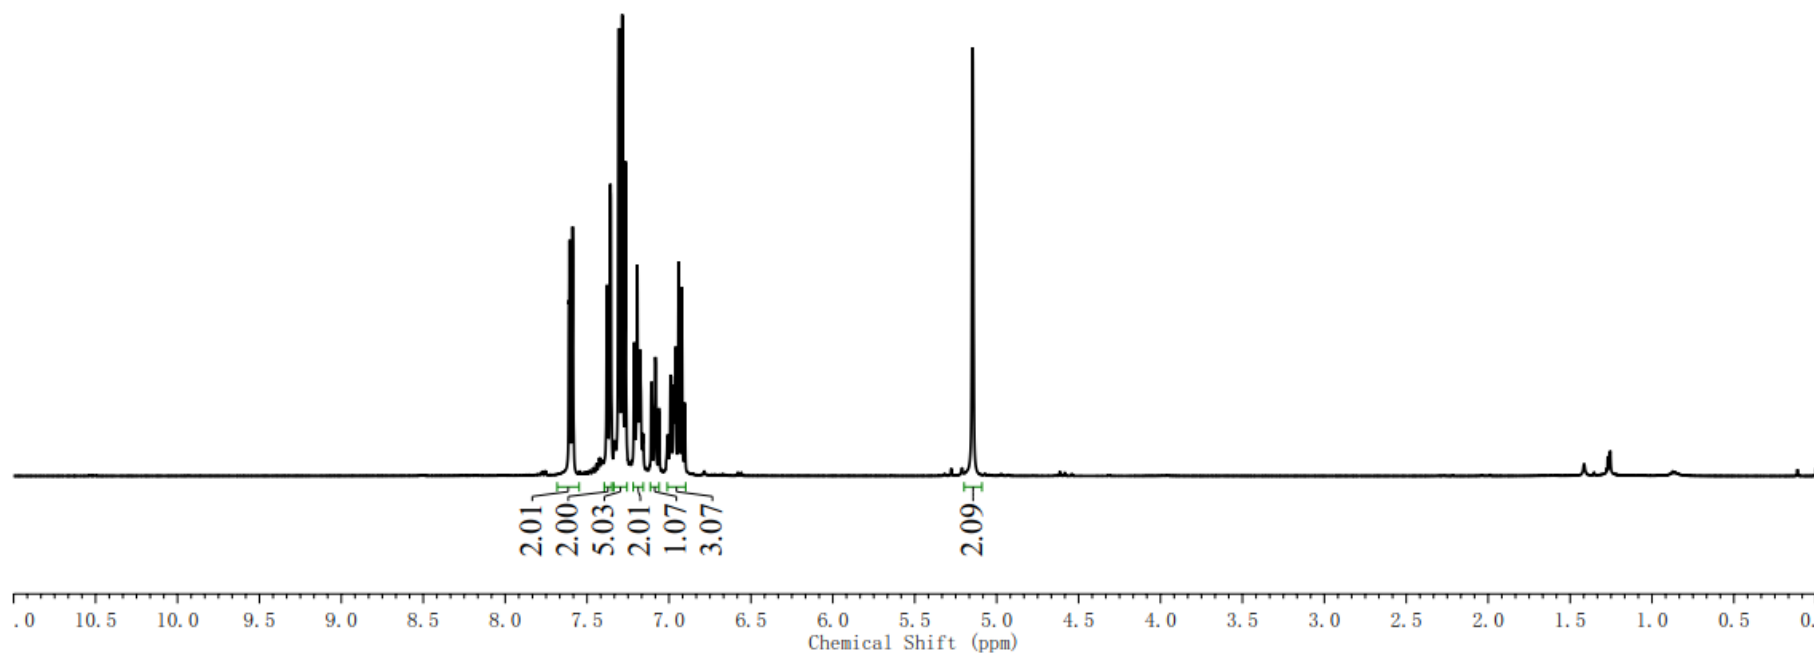

2022-7-4 yy0046-616-zql-1

~161.7939  
~159.3575  
—147.7362  
136.5355  
132.6088  
129.3860  
129.2073  
129.1287  
128.7079  
128.1576  
128.0926  
128.0528  
126.4254  
124.7587  
124.7239  
121.0843  
115.7618  
115.5574  
114.9248  
77.5752  
77.2573  
76.9395  
44.4473  
44.3982

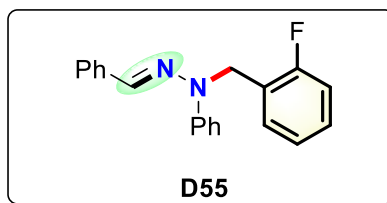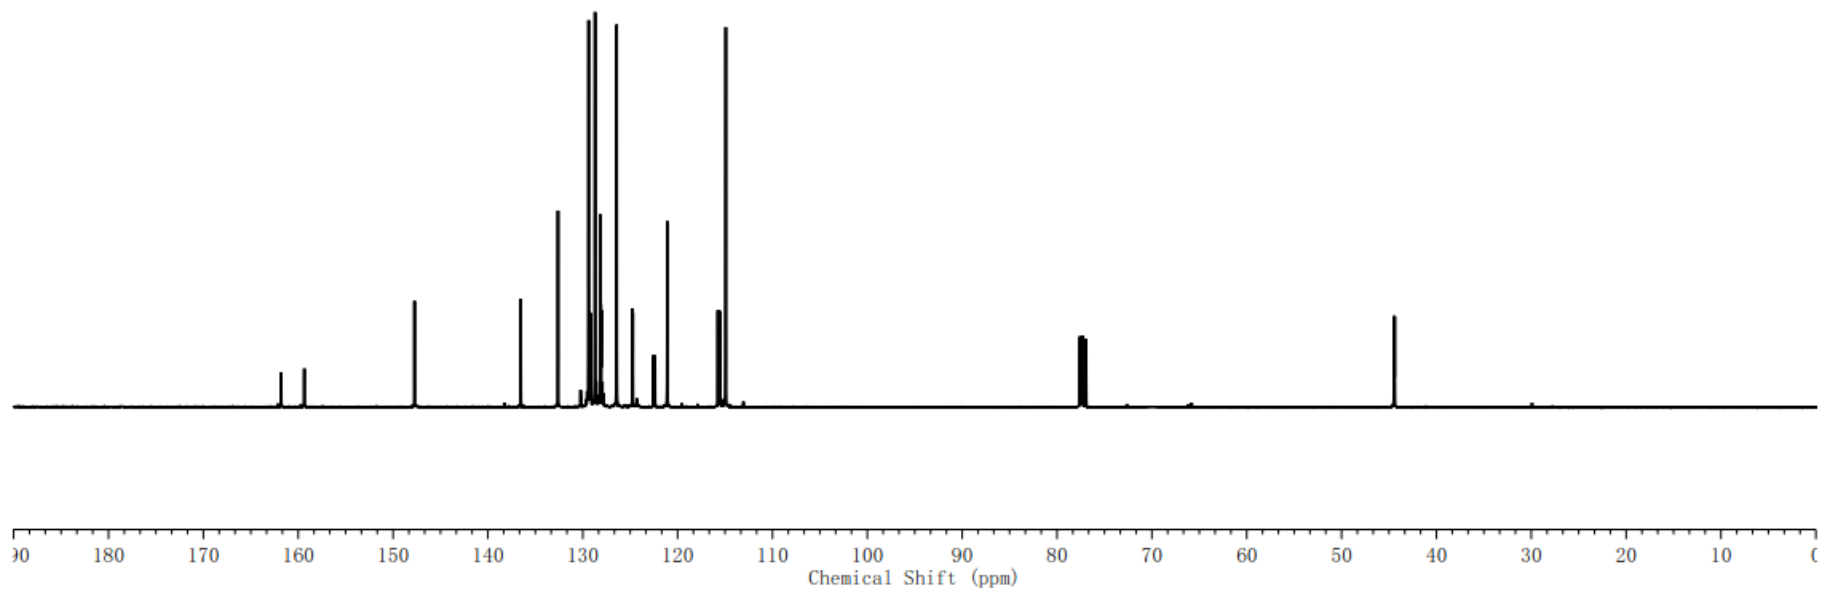

2022-06-22 yy0025 61zql-02

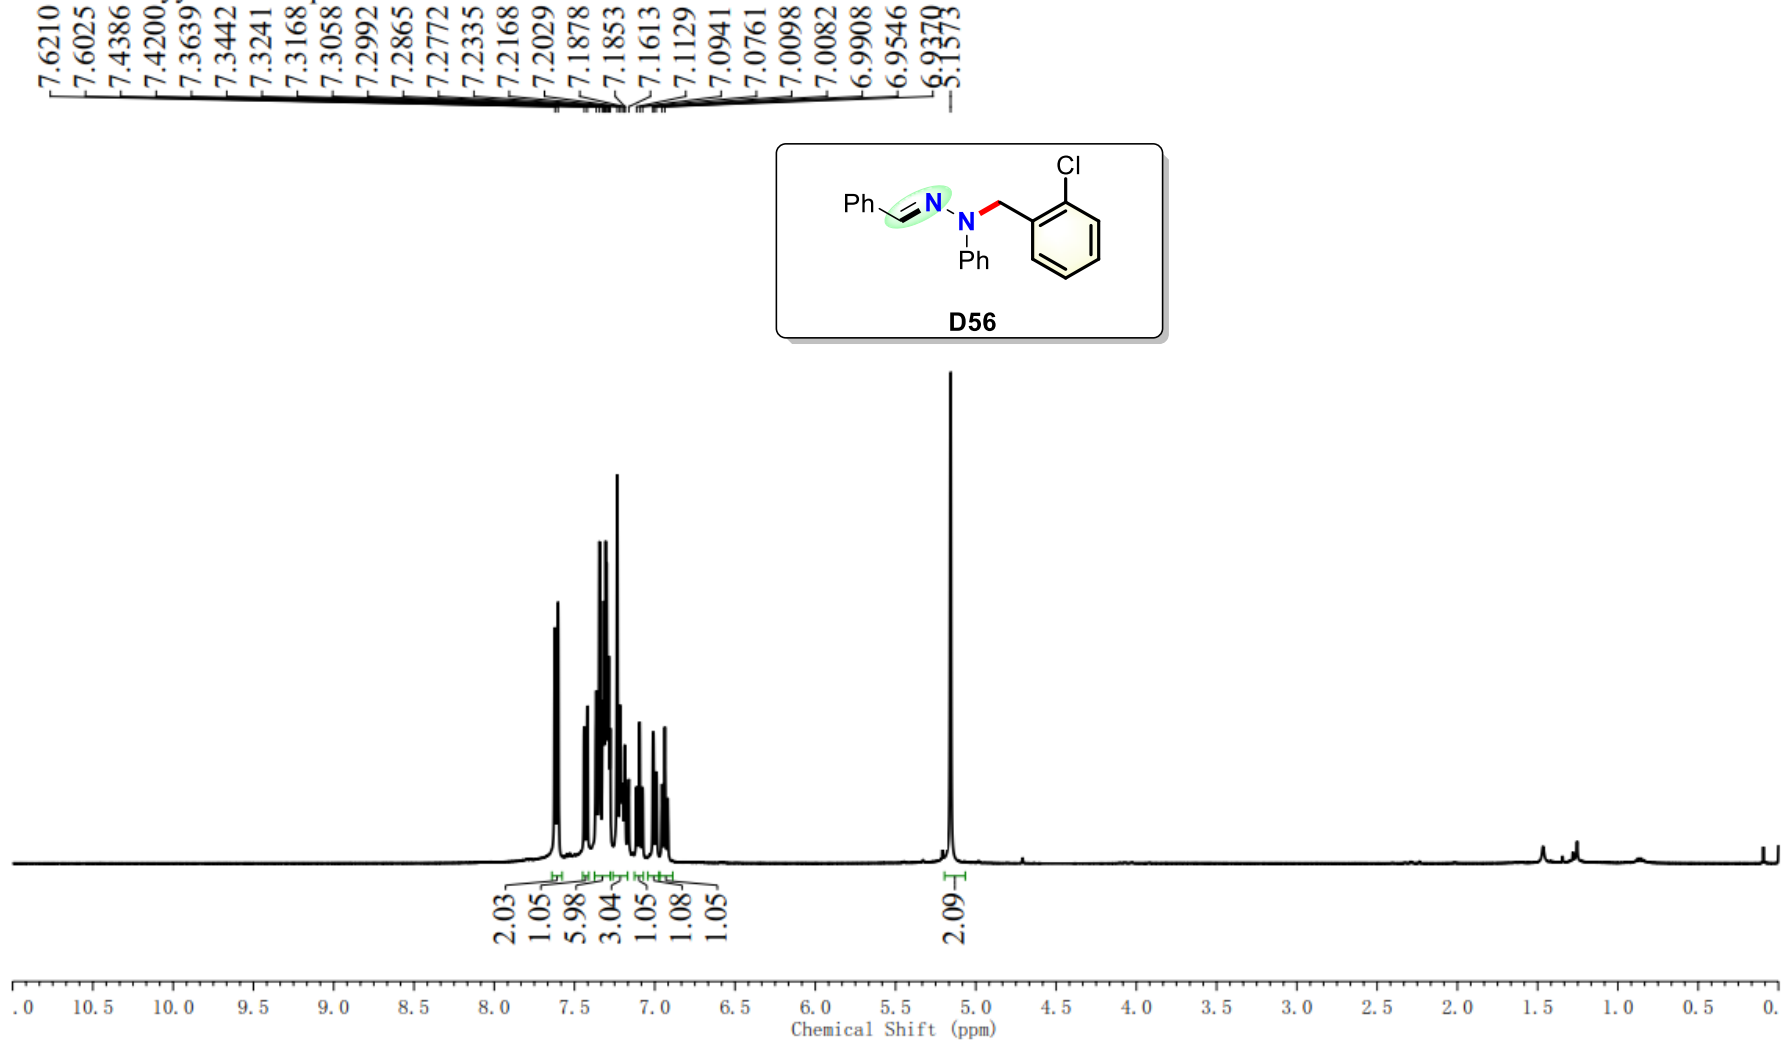

2022-06-24 yy0027 616-zql-2

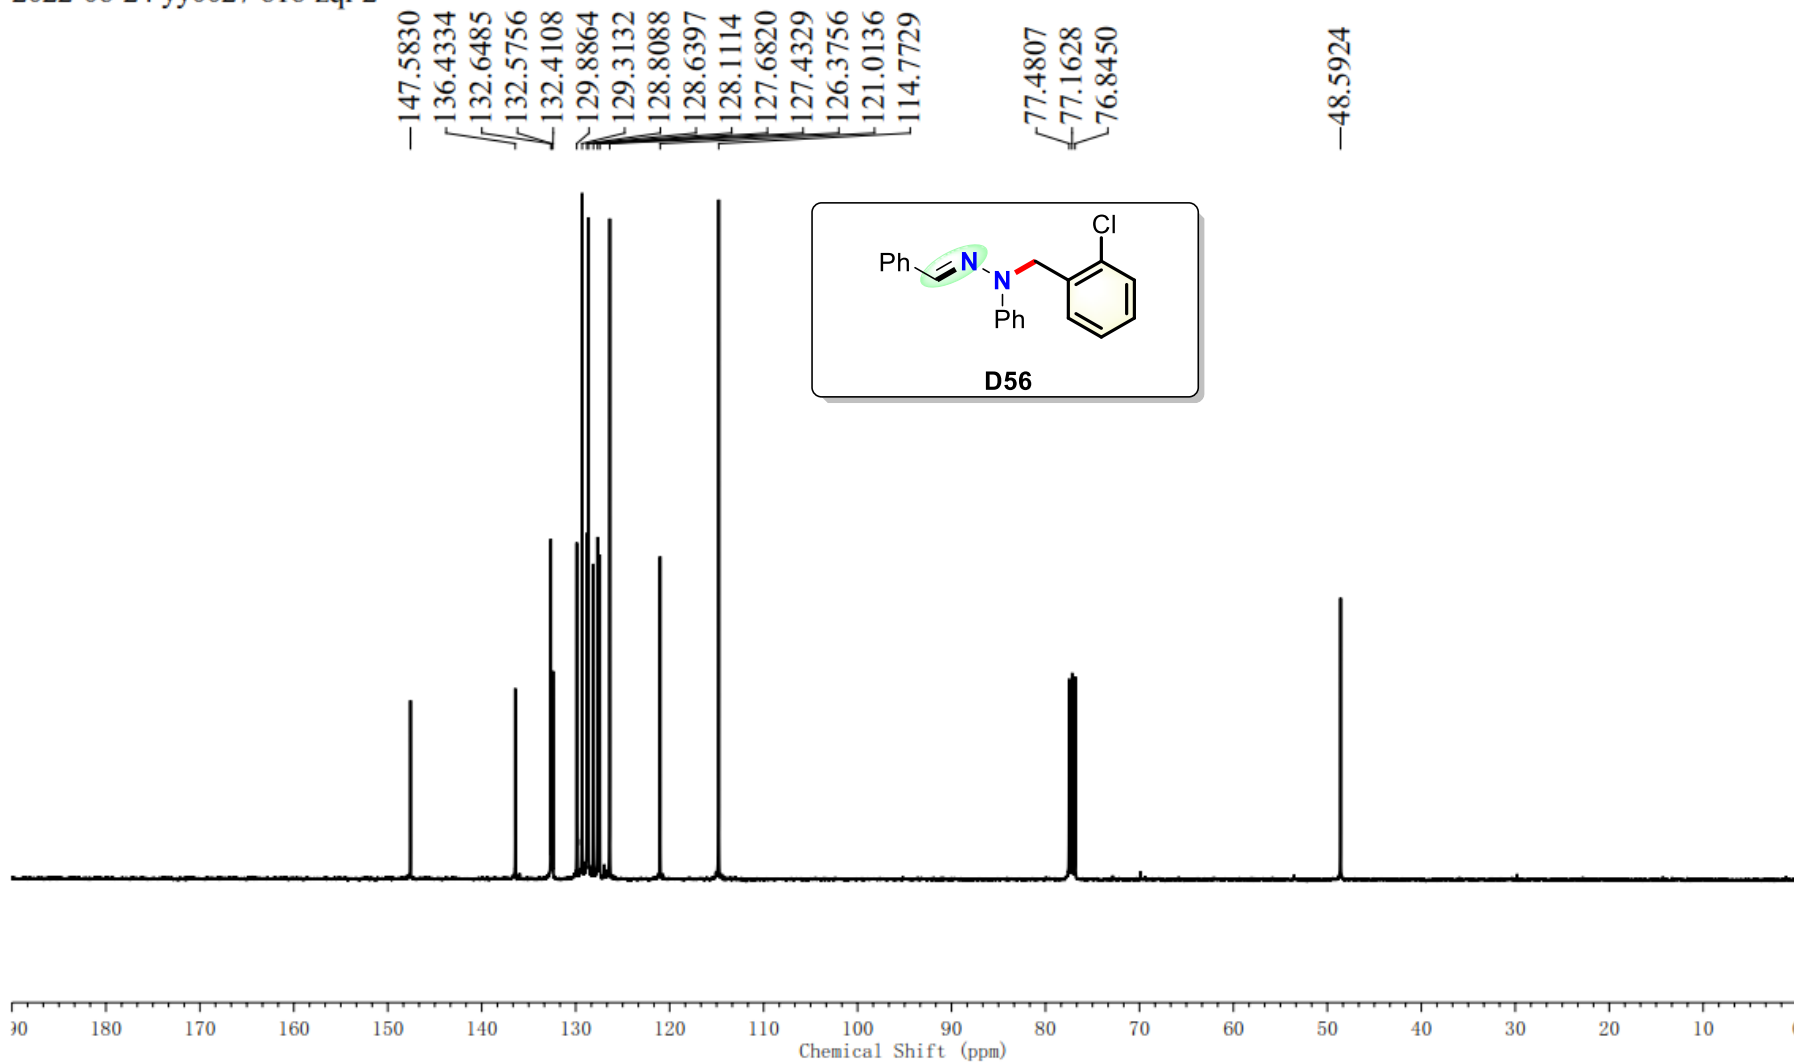

2022-7-7 yy0009-616-zql-2

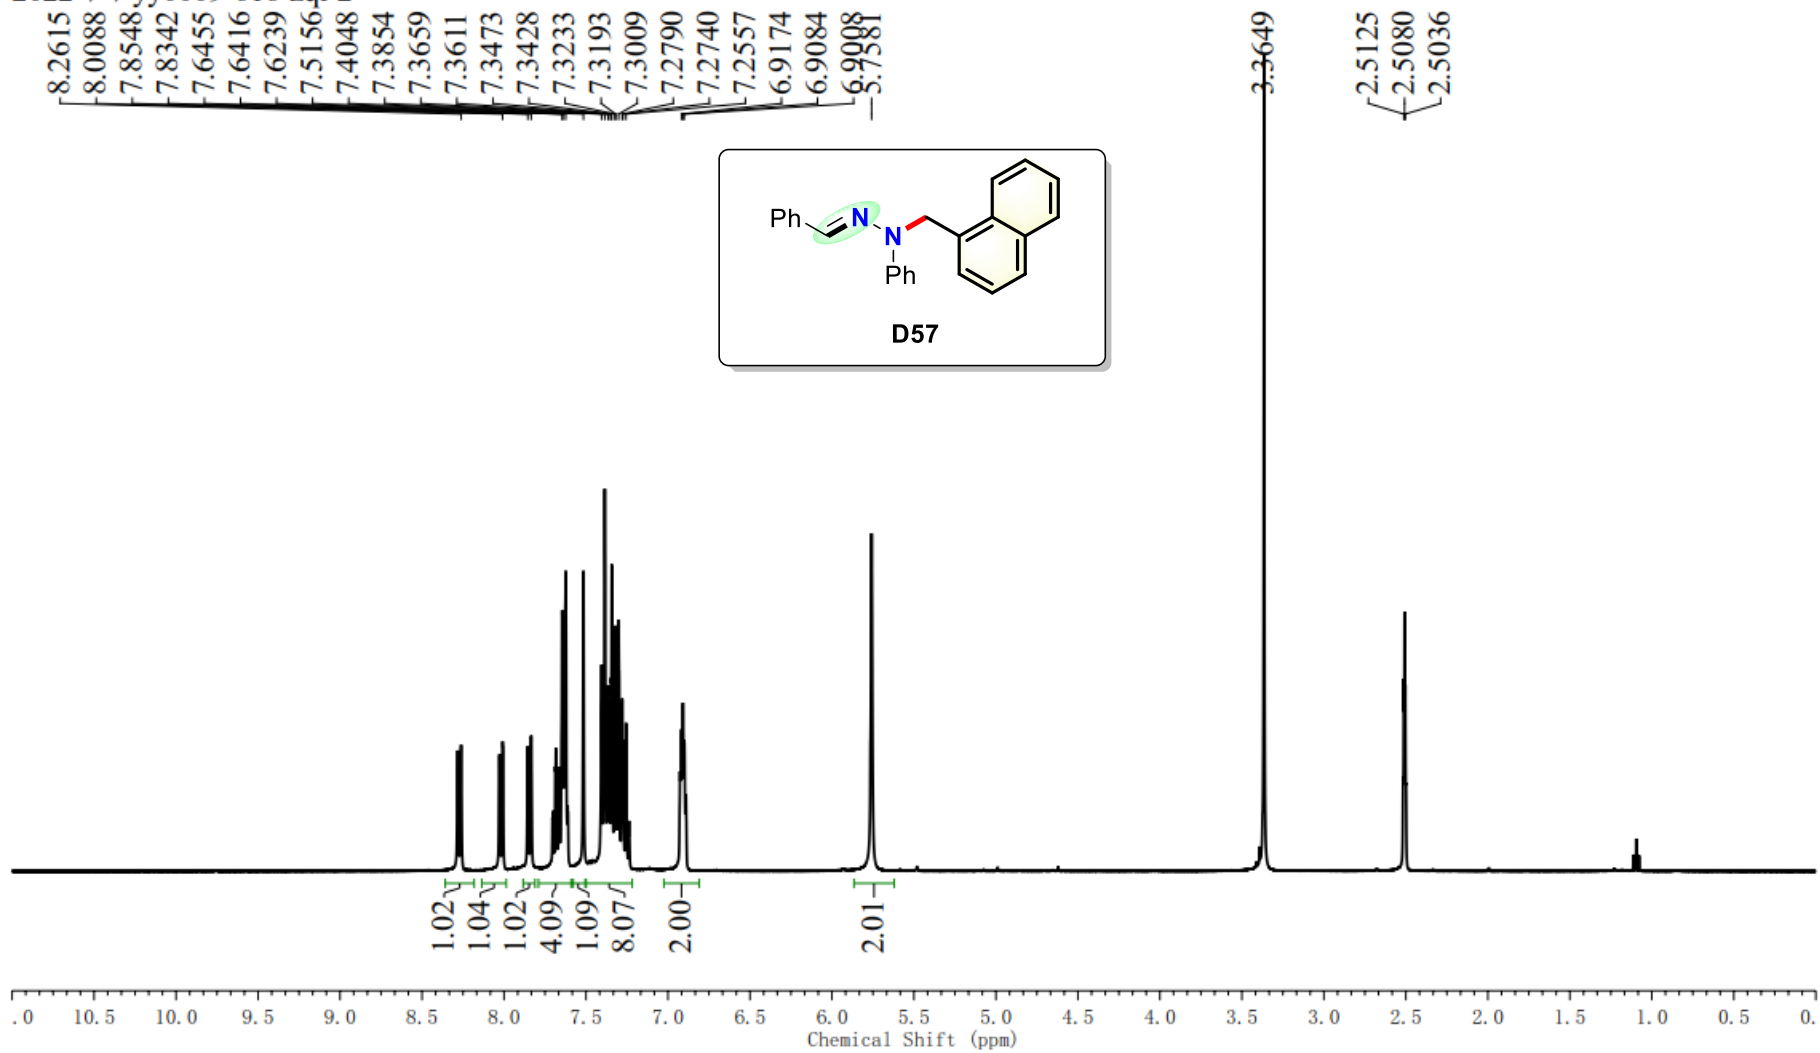



2022-07-12 YY0006 616-zql-02

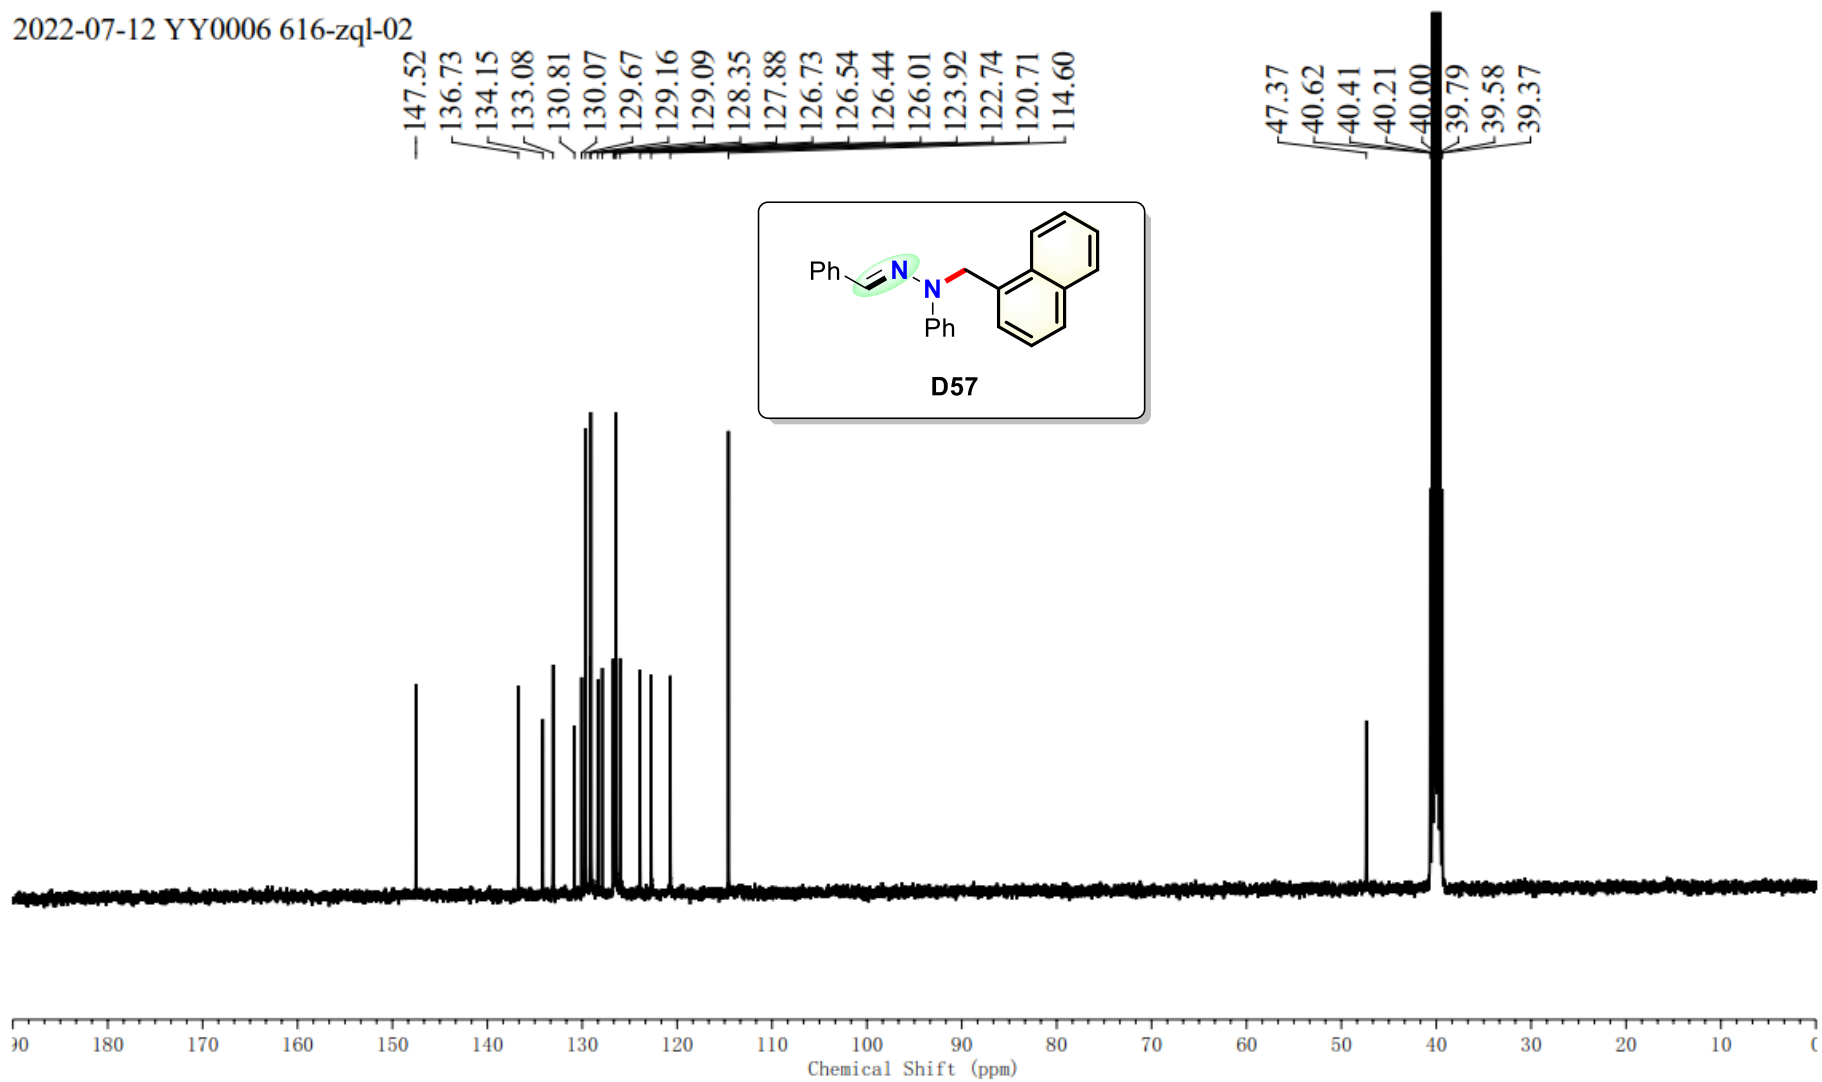

2022-05-28-yy0007-616-zq1-2

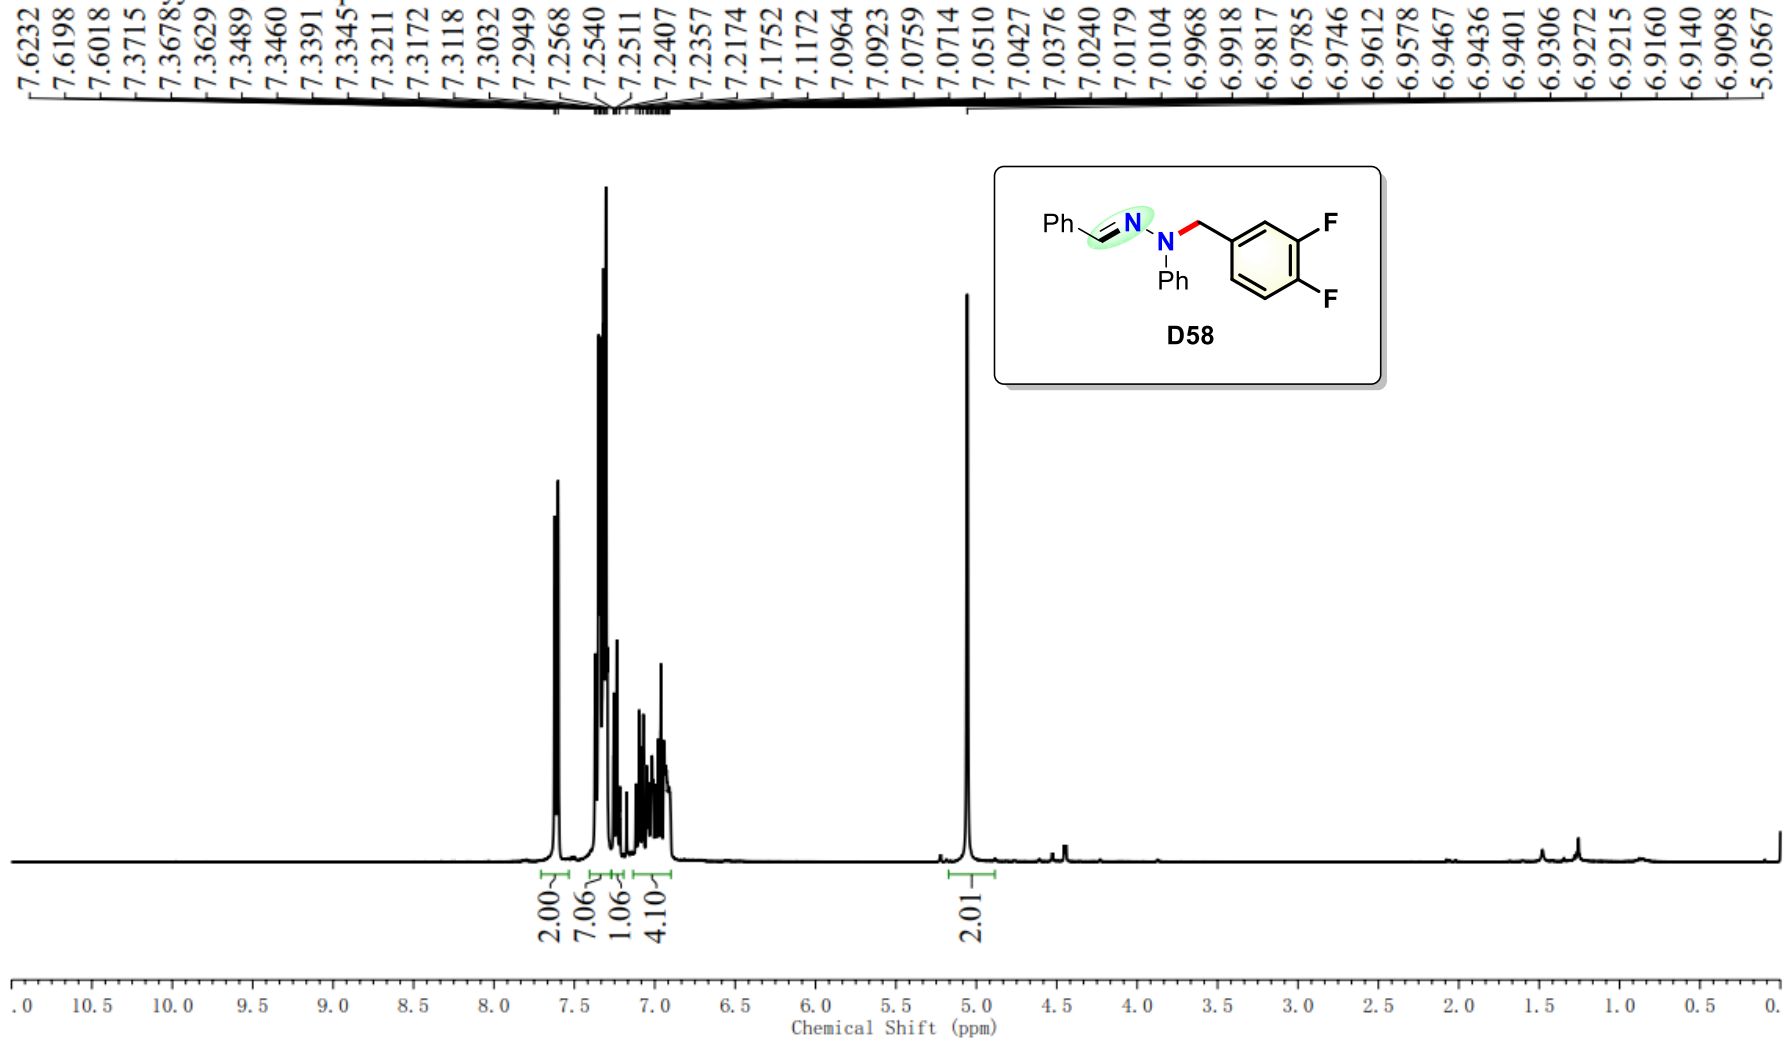

S258

2022-05-30 YY0021 616-ZQL-0527-2

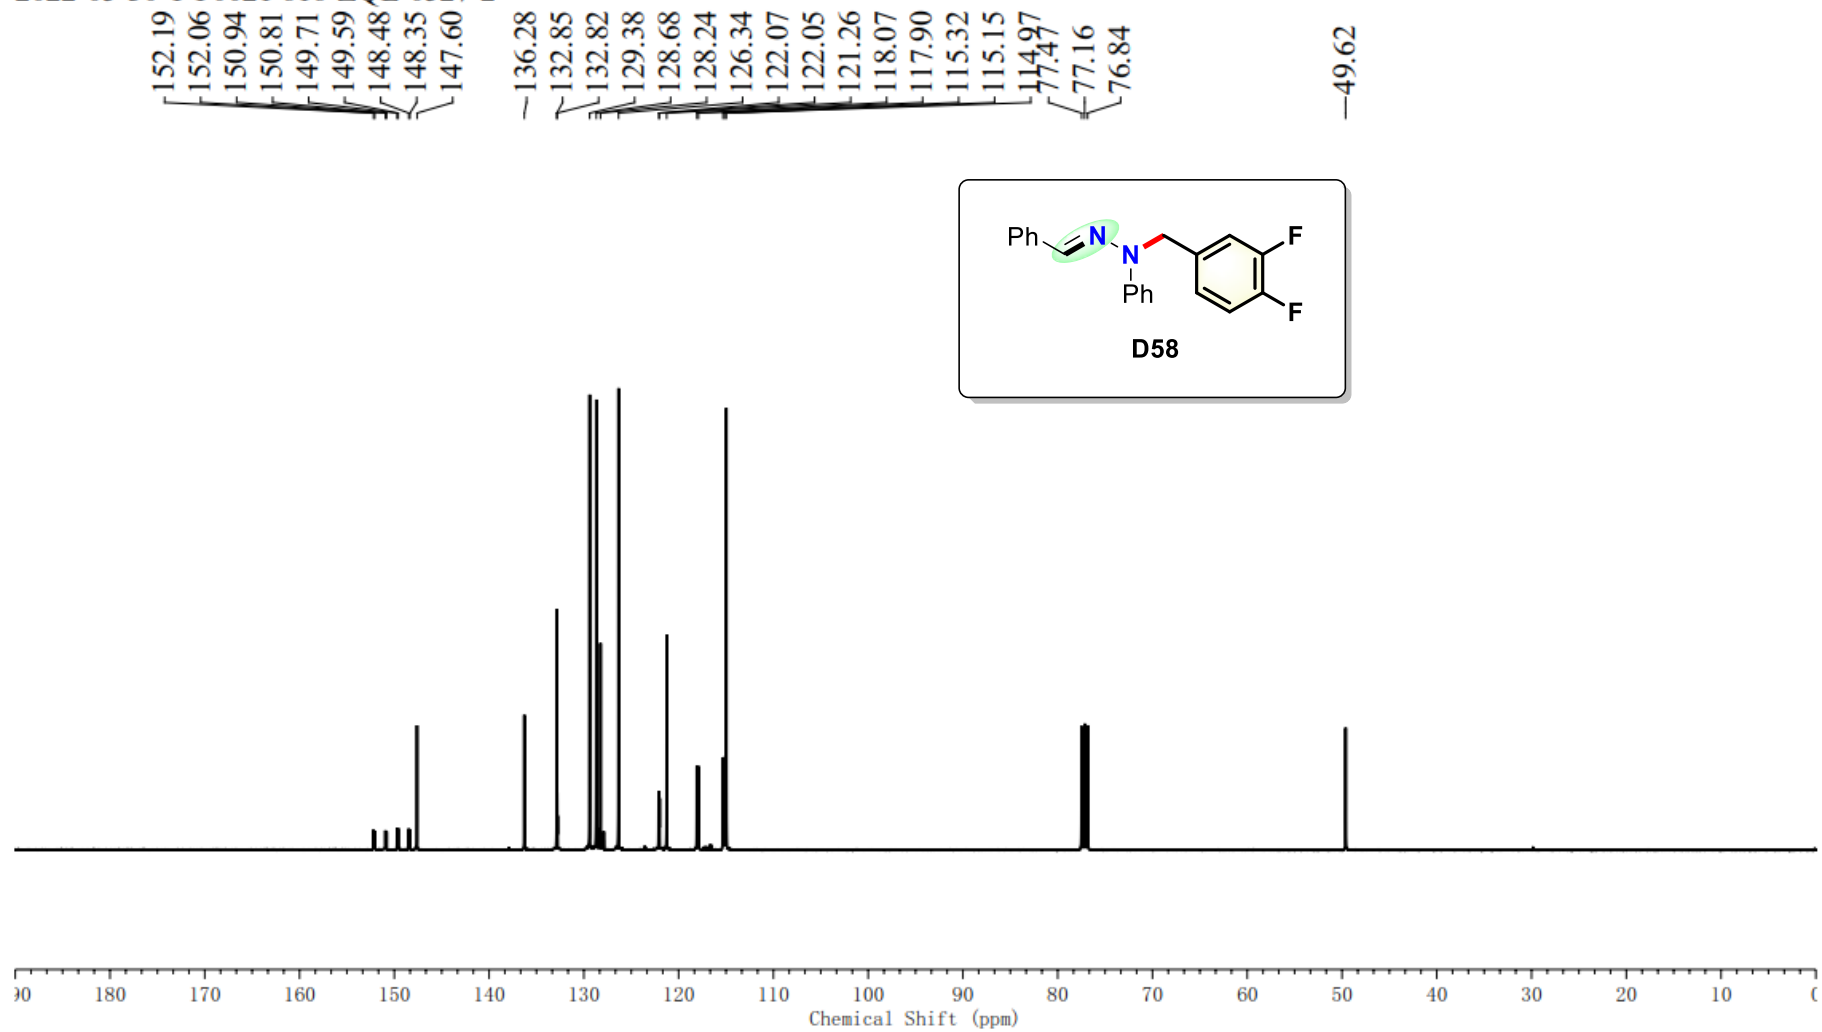

2022-05-30 YY0021 616-ZQL-0527-2

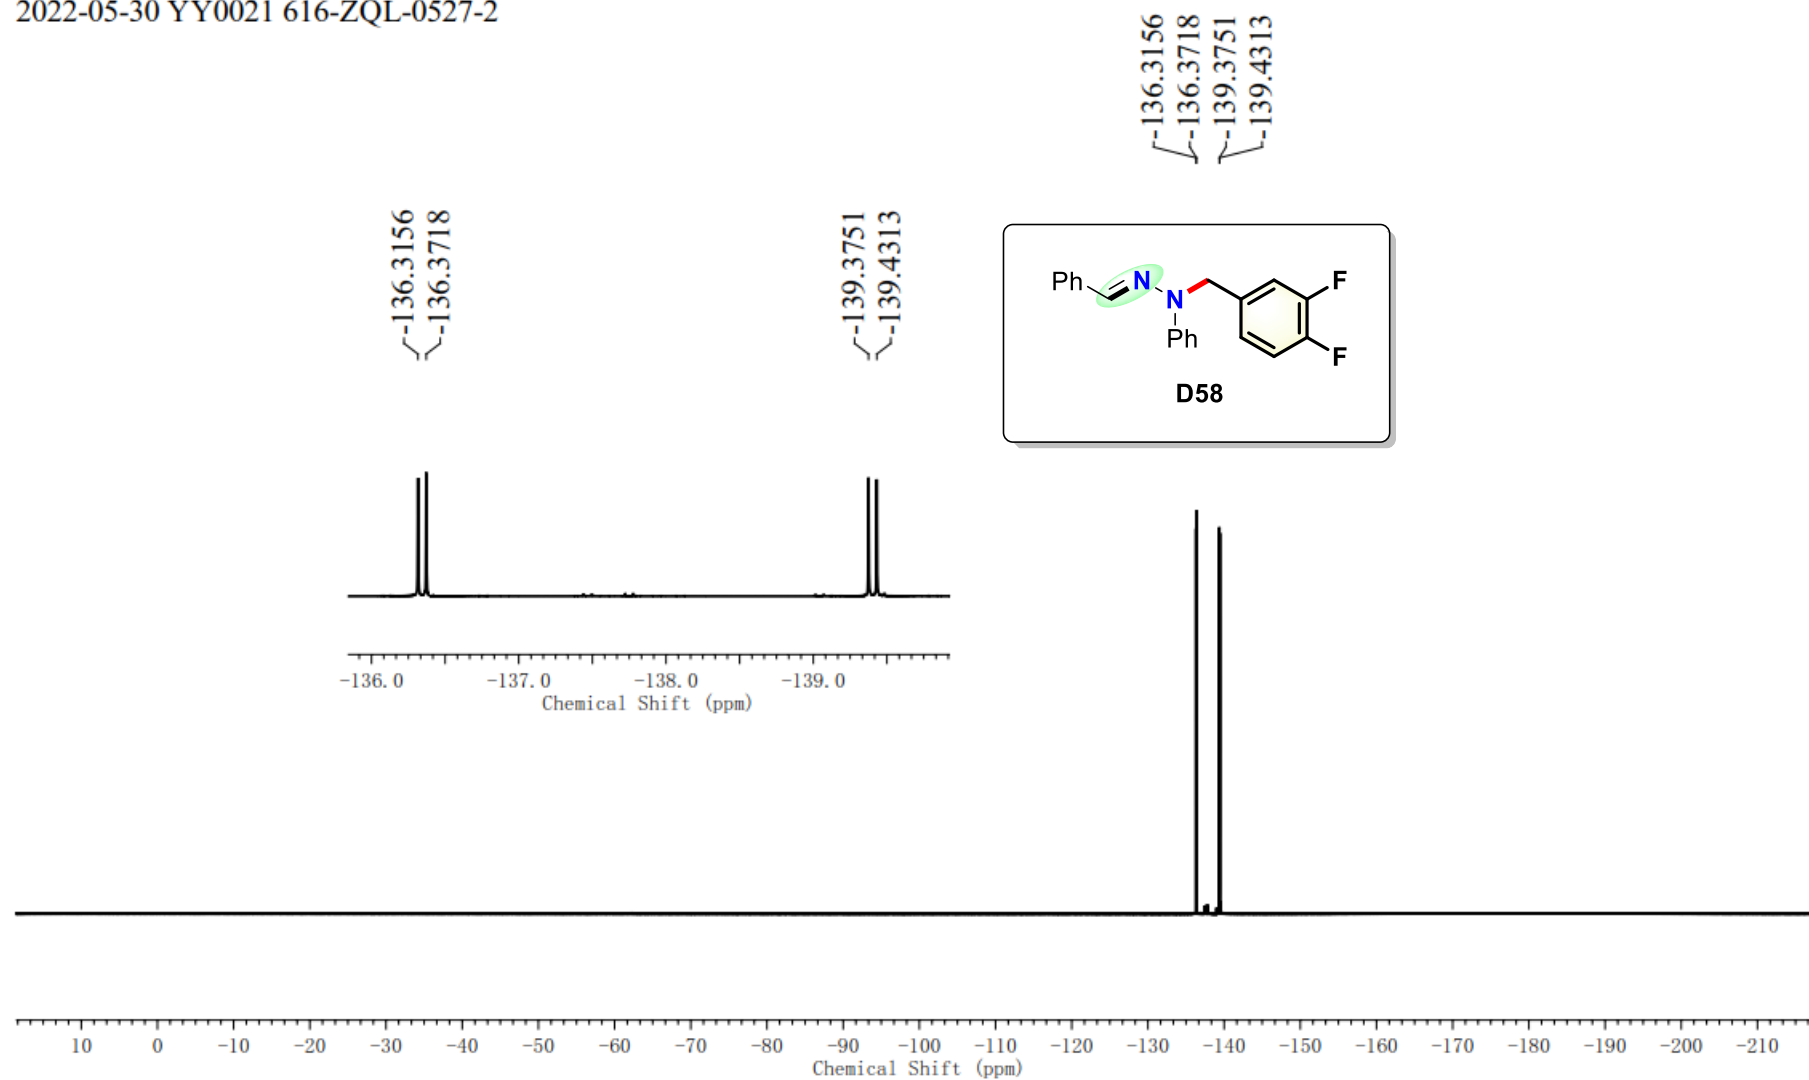

2022-06-20 yy0003-616-zql-3

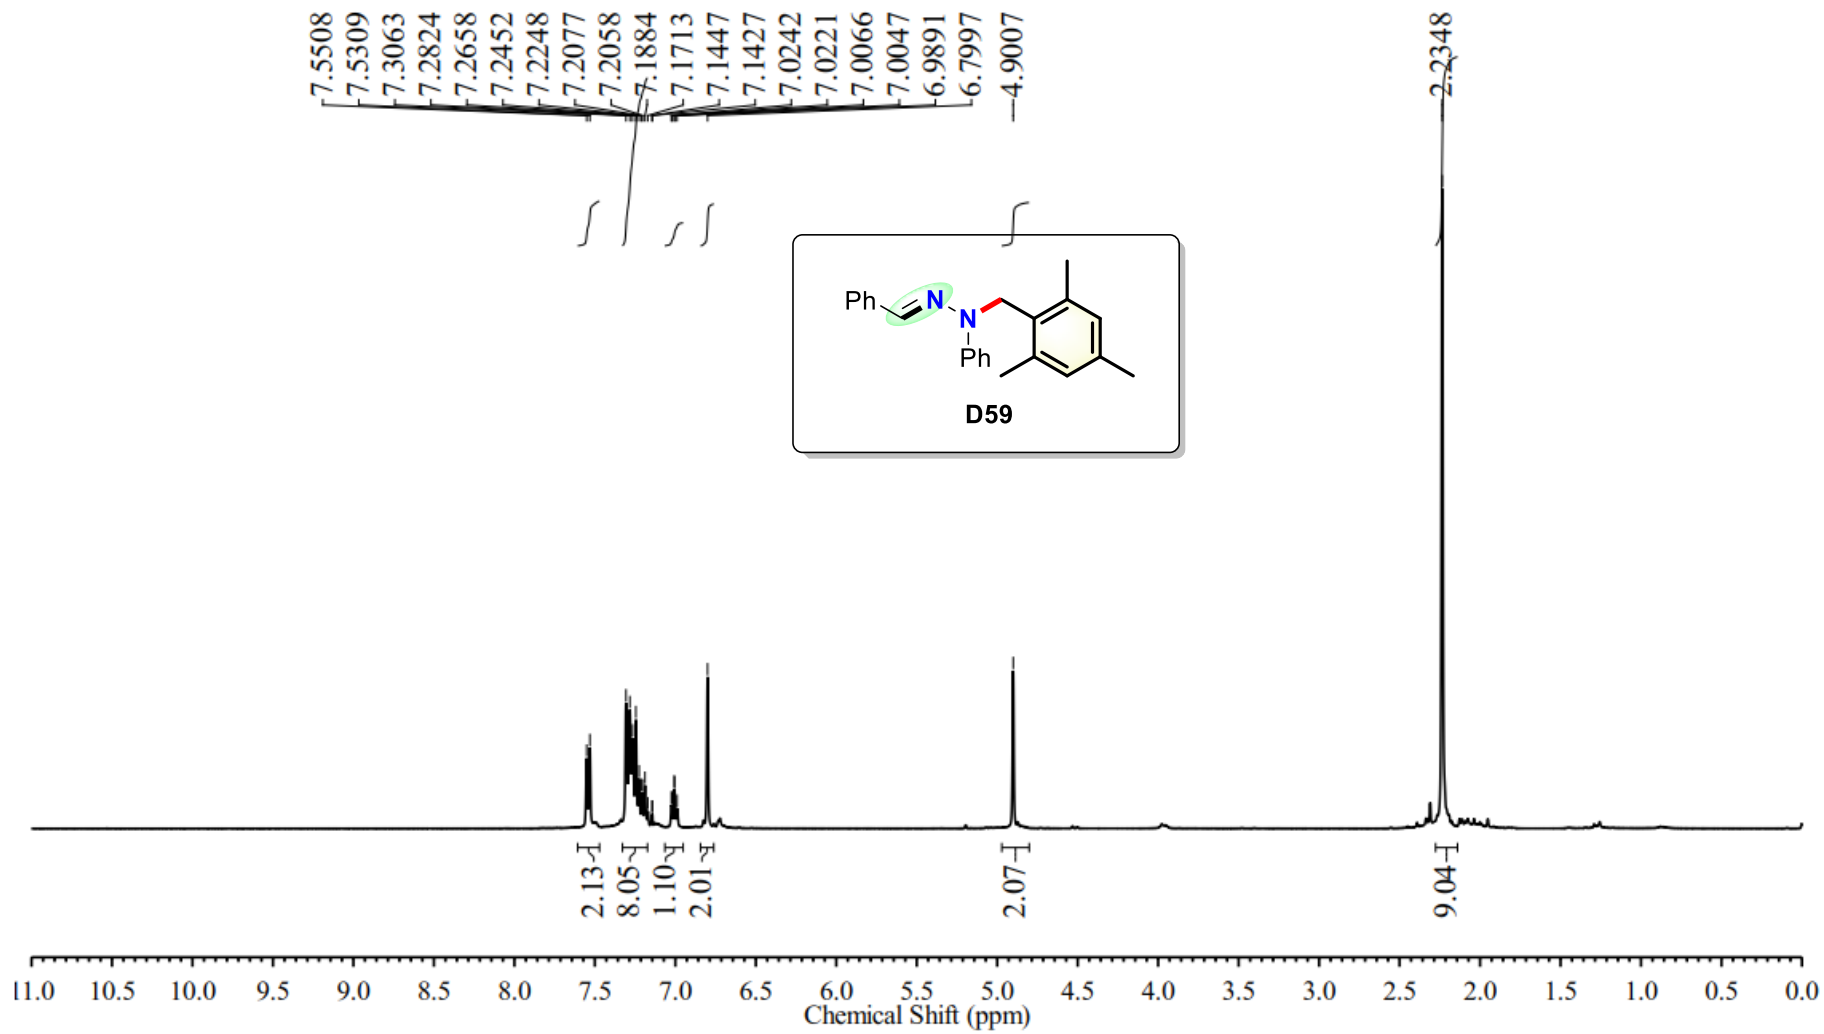

2022-06-21 yy0027 616-zql-3

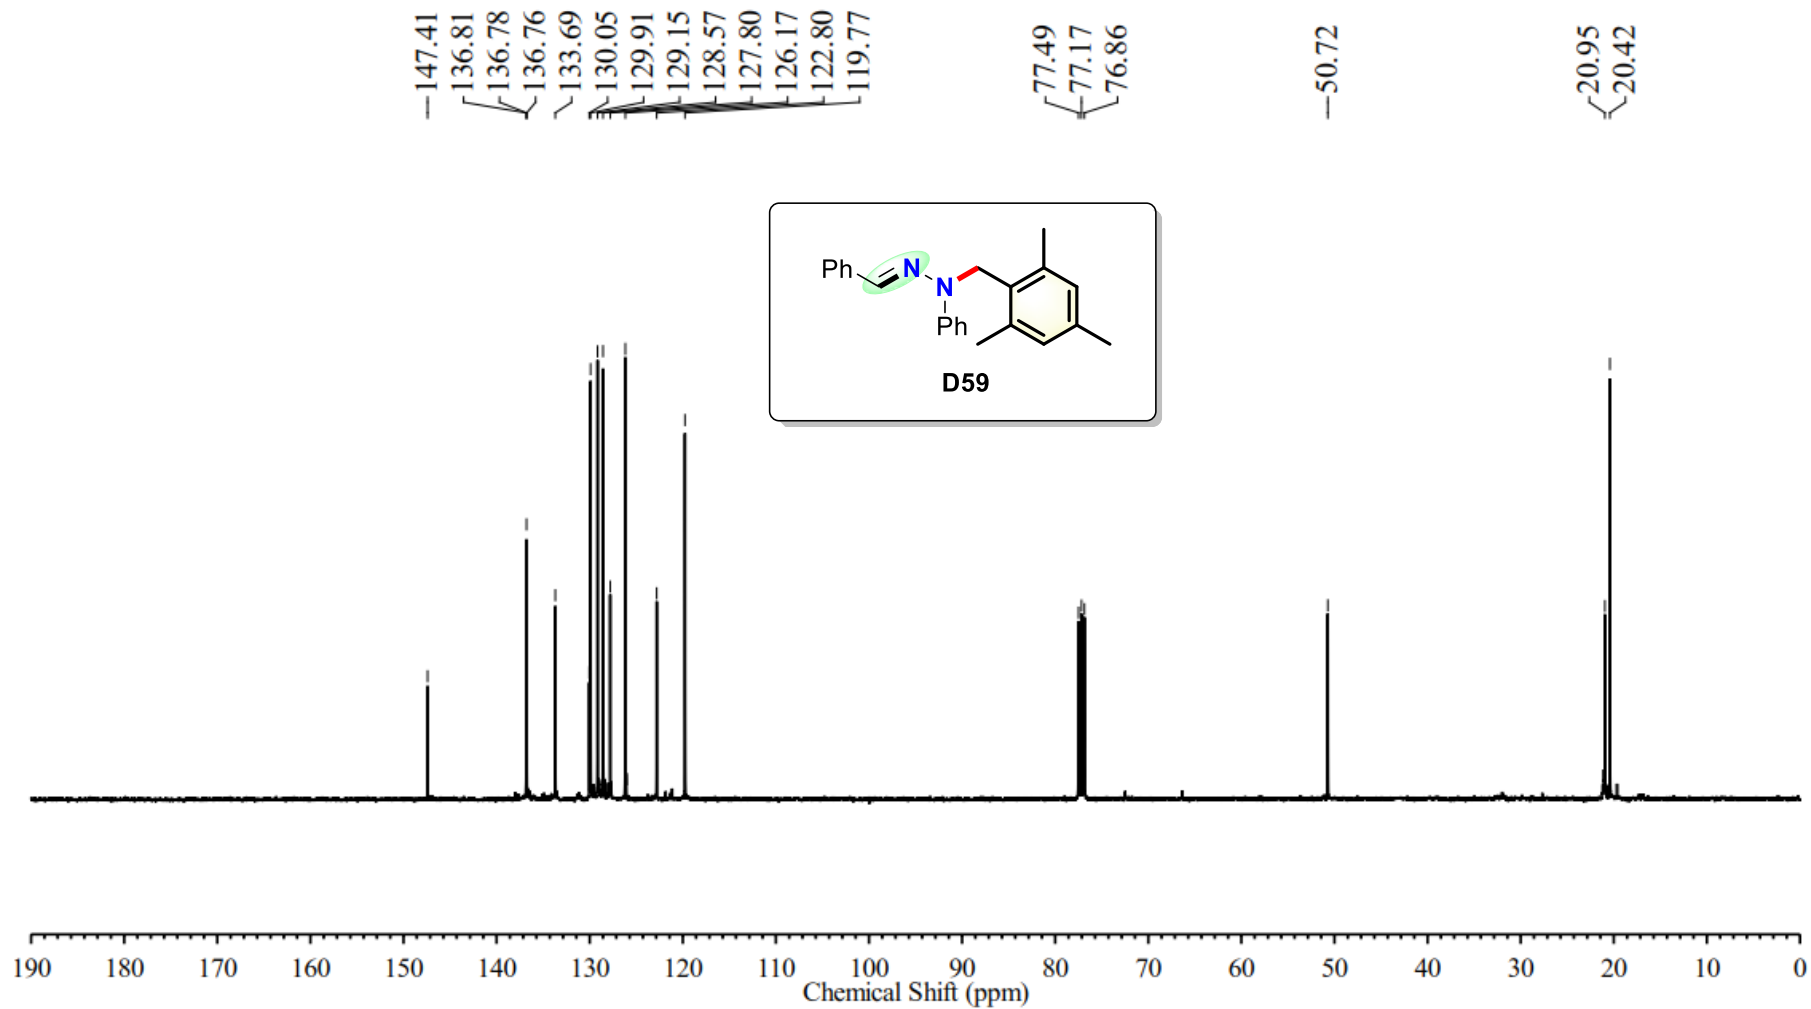

2022-07-18-yy0004-616-1-a-12.10.fid

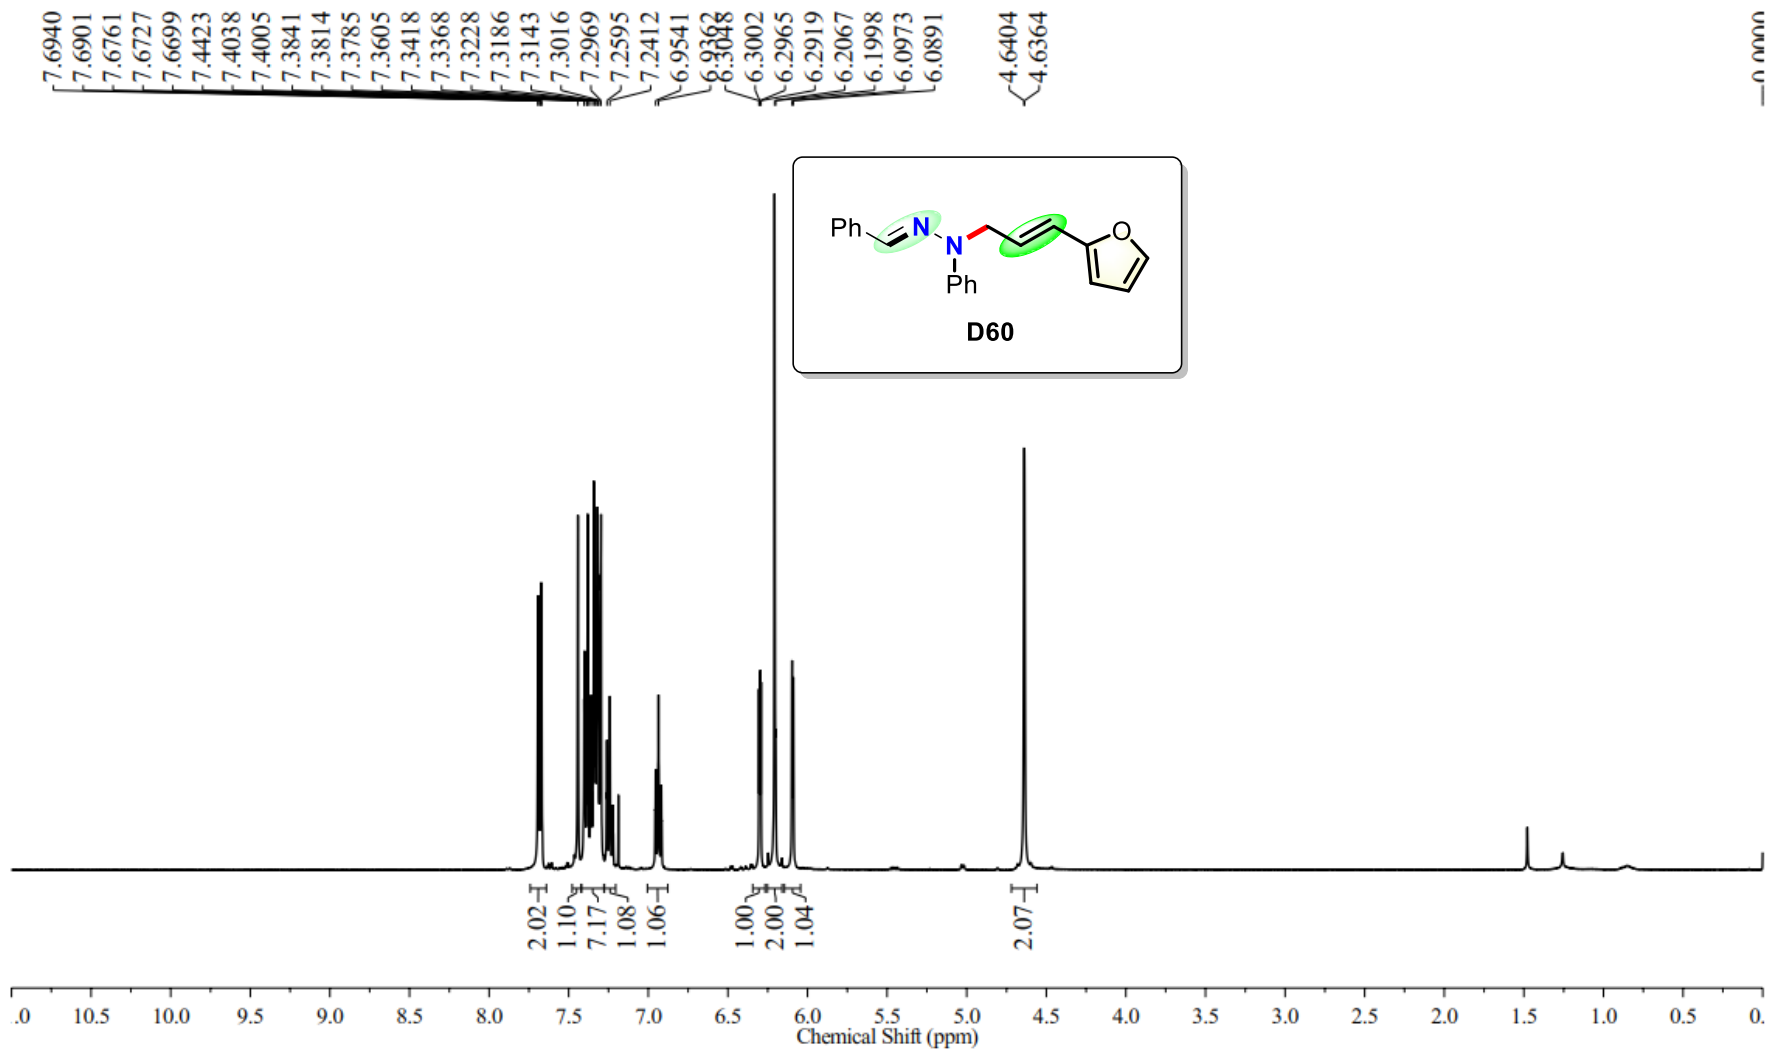

2022-07-19-YY0059-616-L-A12.10.fid

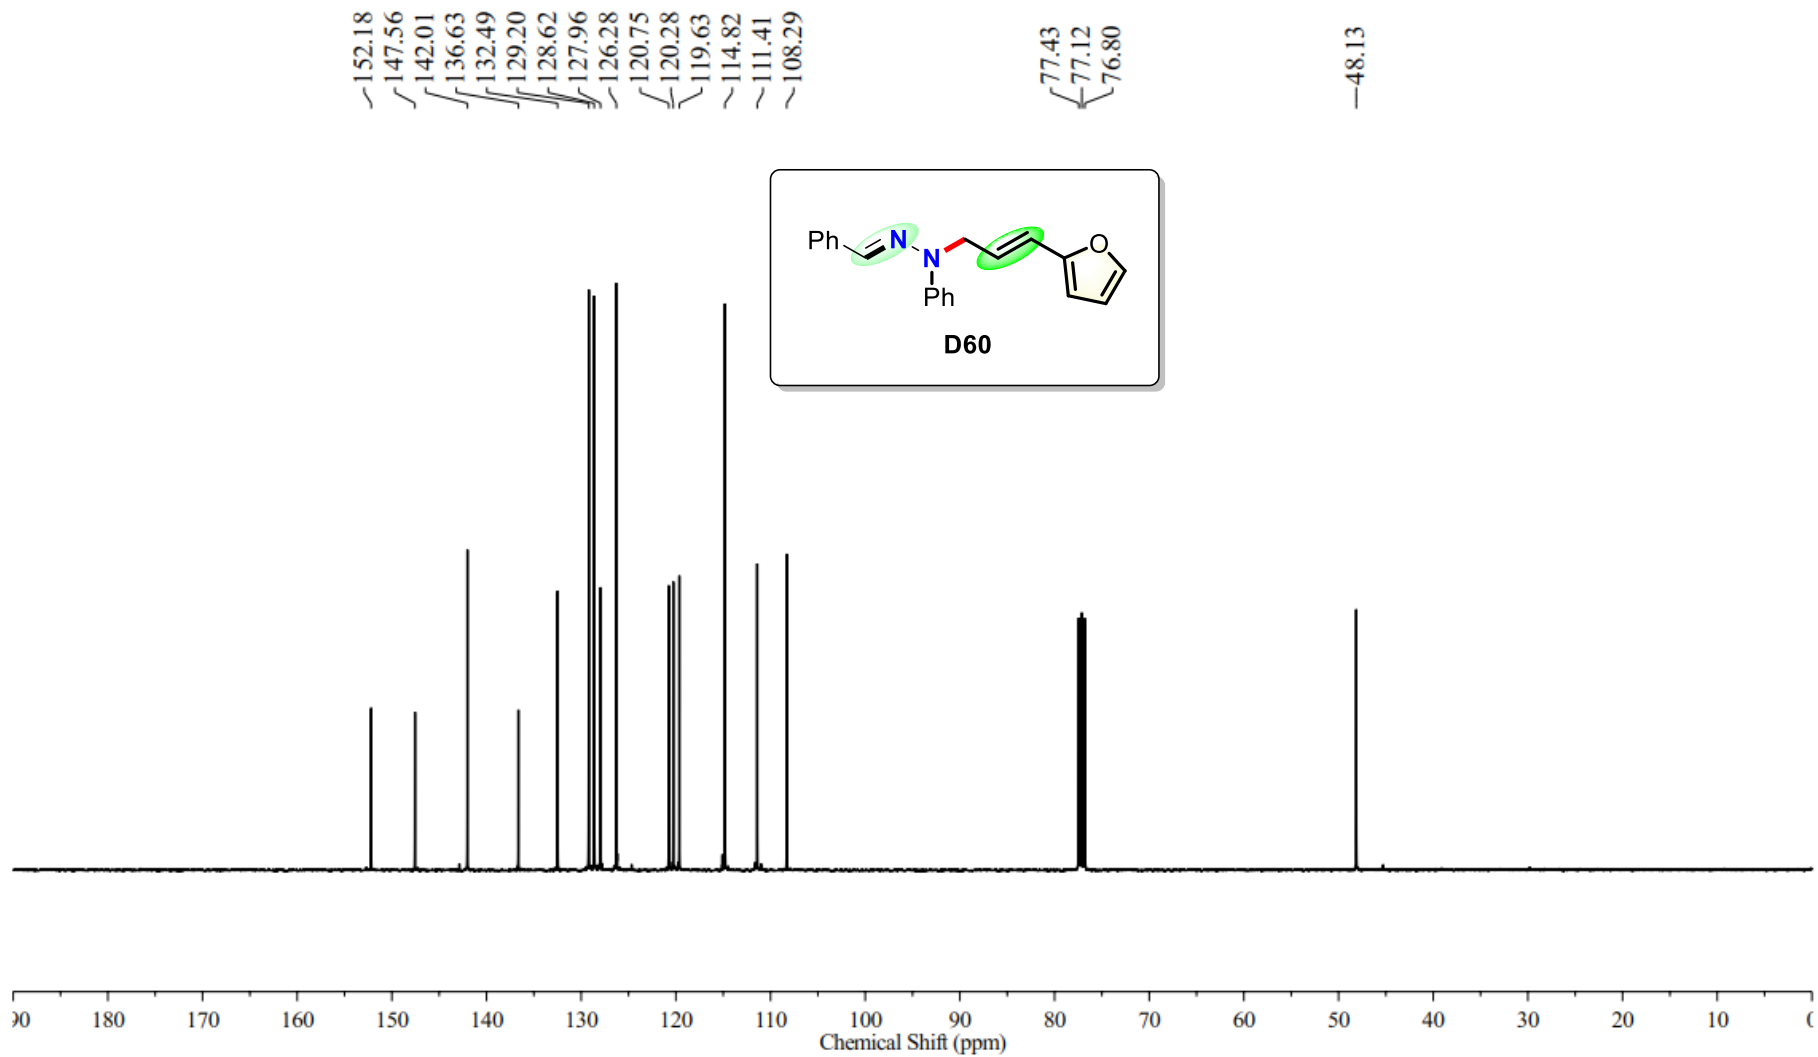



2022-7-7 yy0009-616-zql-1

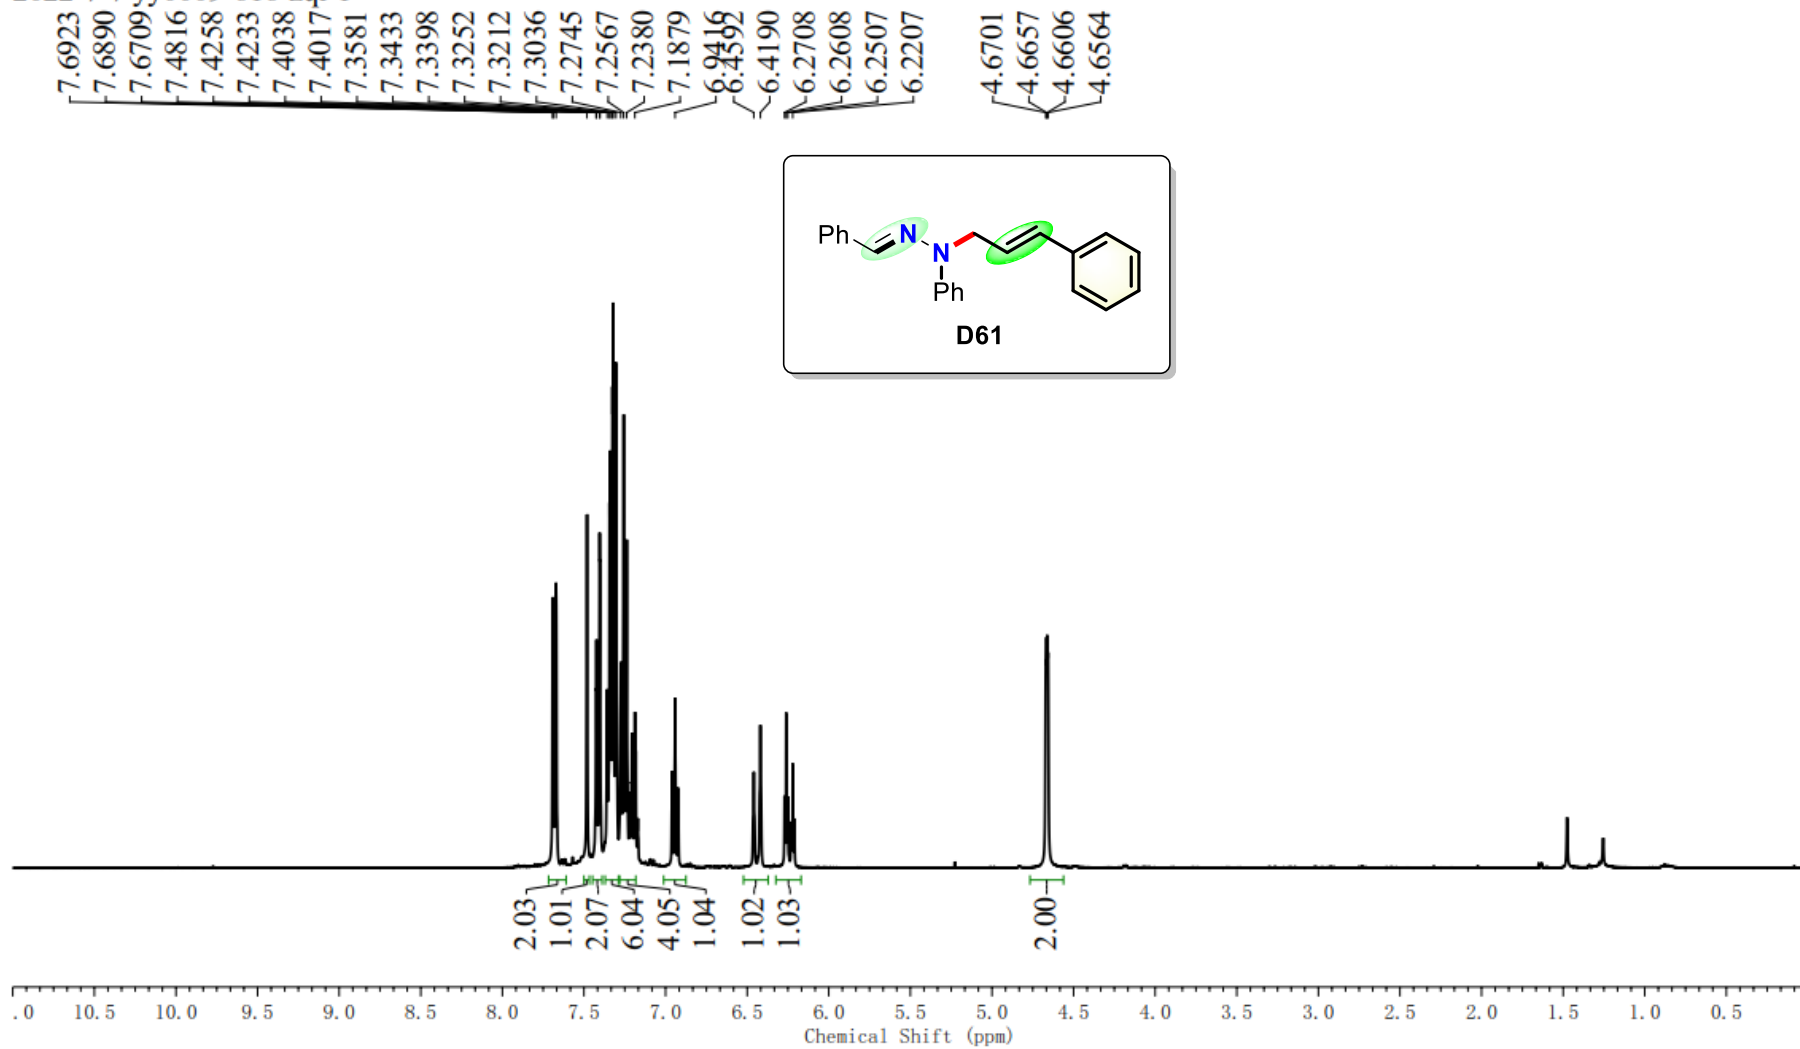

2022-07-12 YY0006 616-zql-01

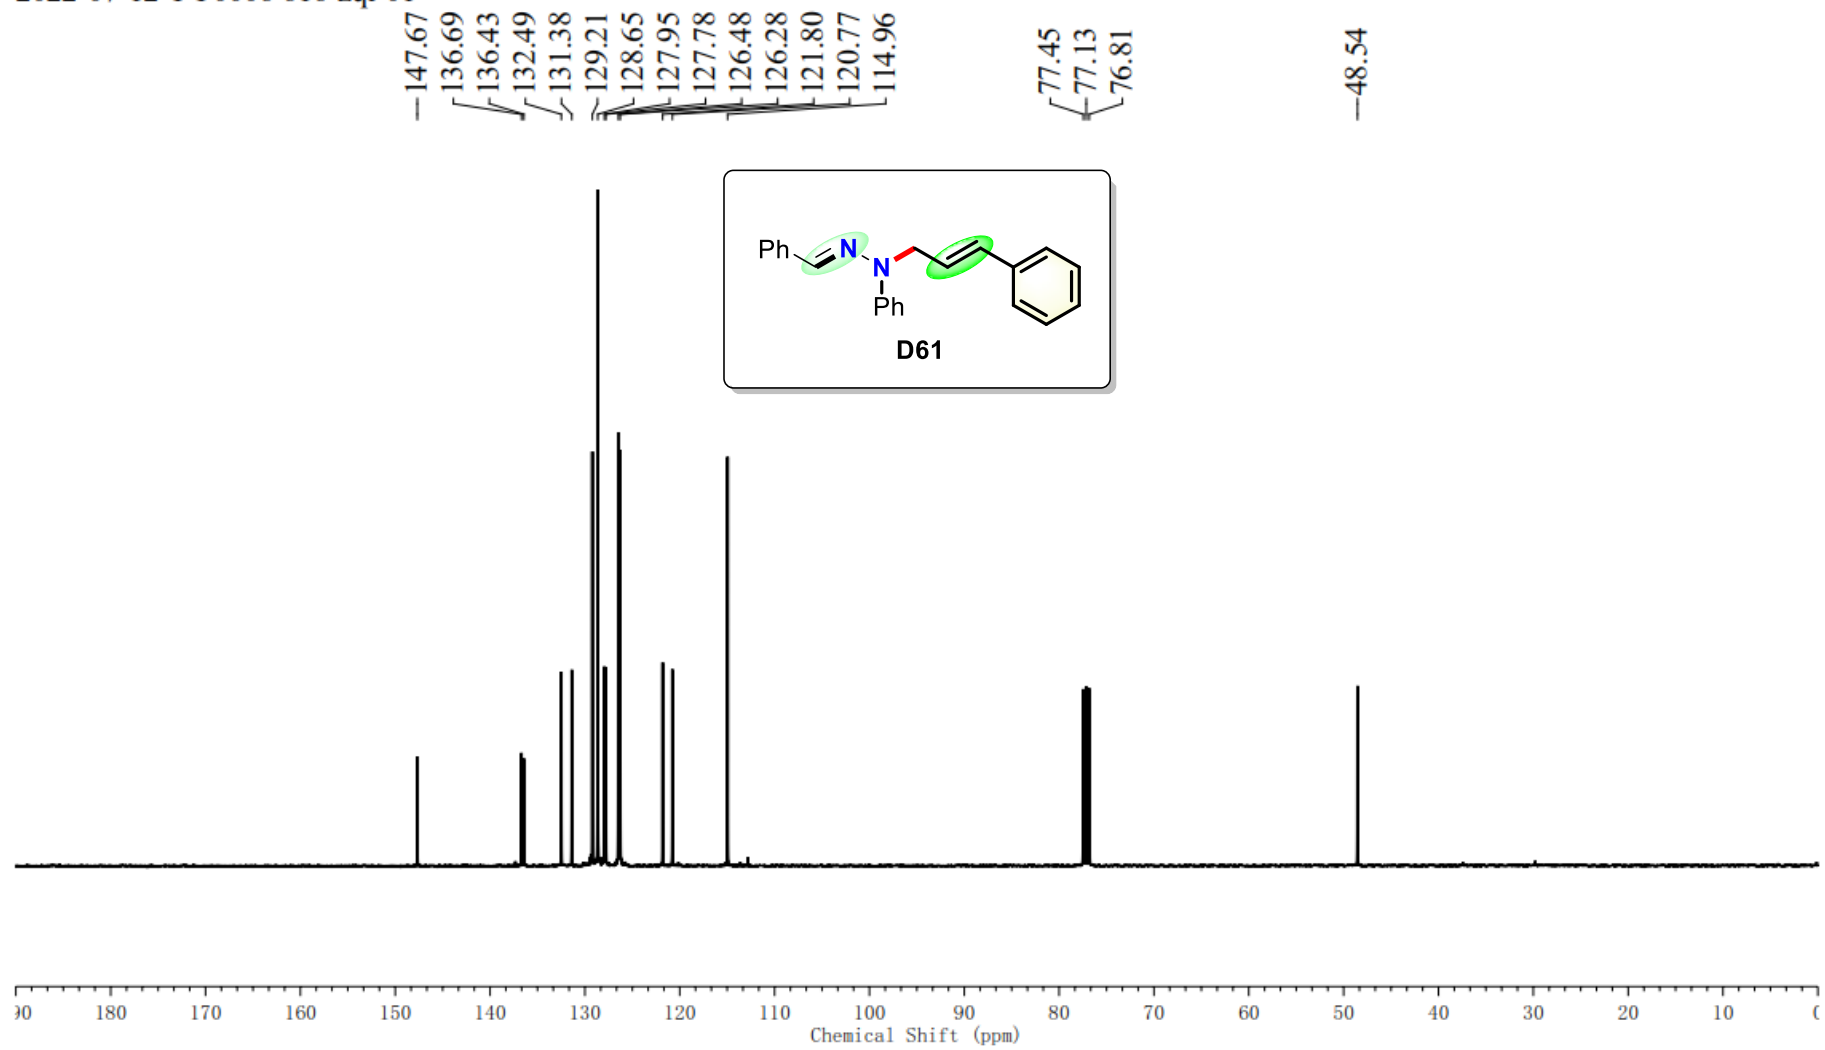

2022-6-14 YY0007-616-L-B4.10.fid

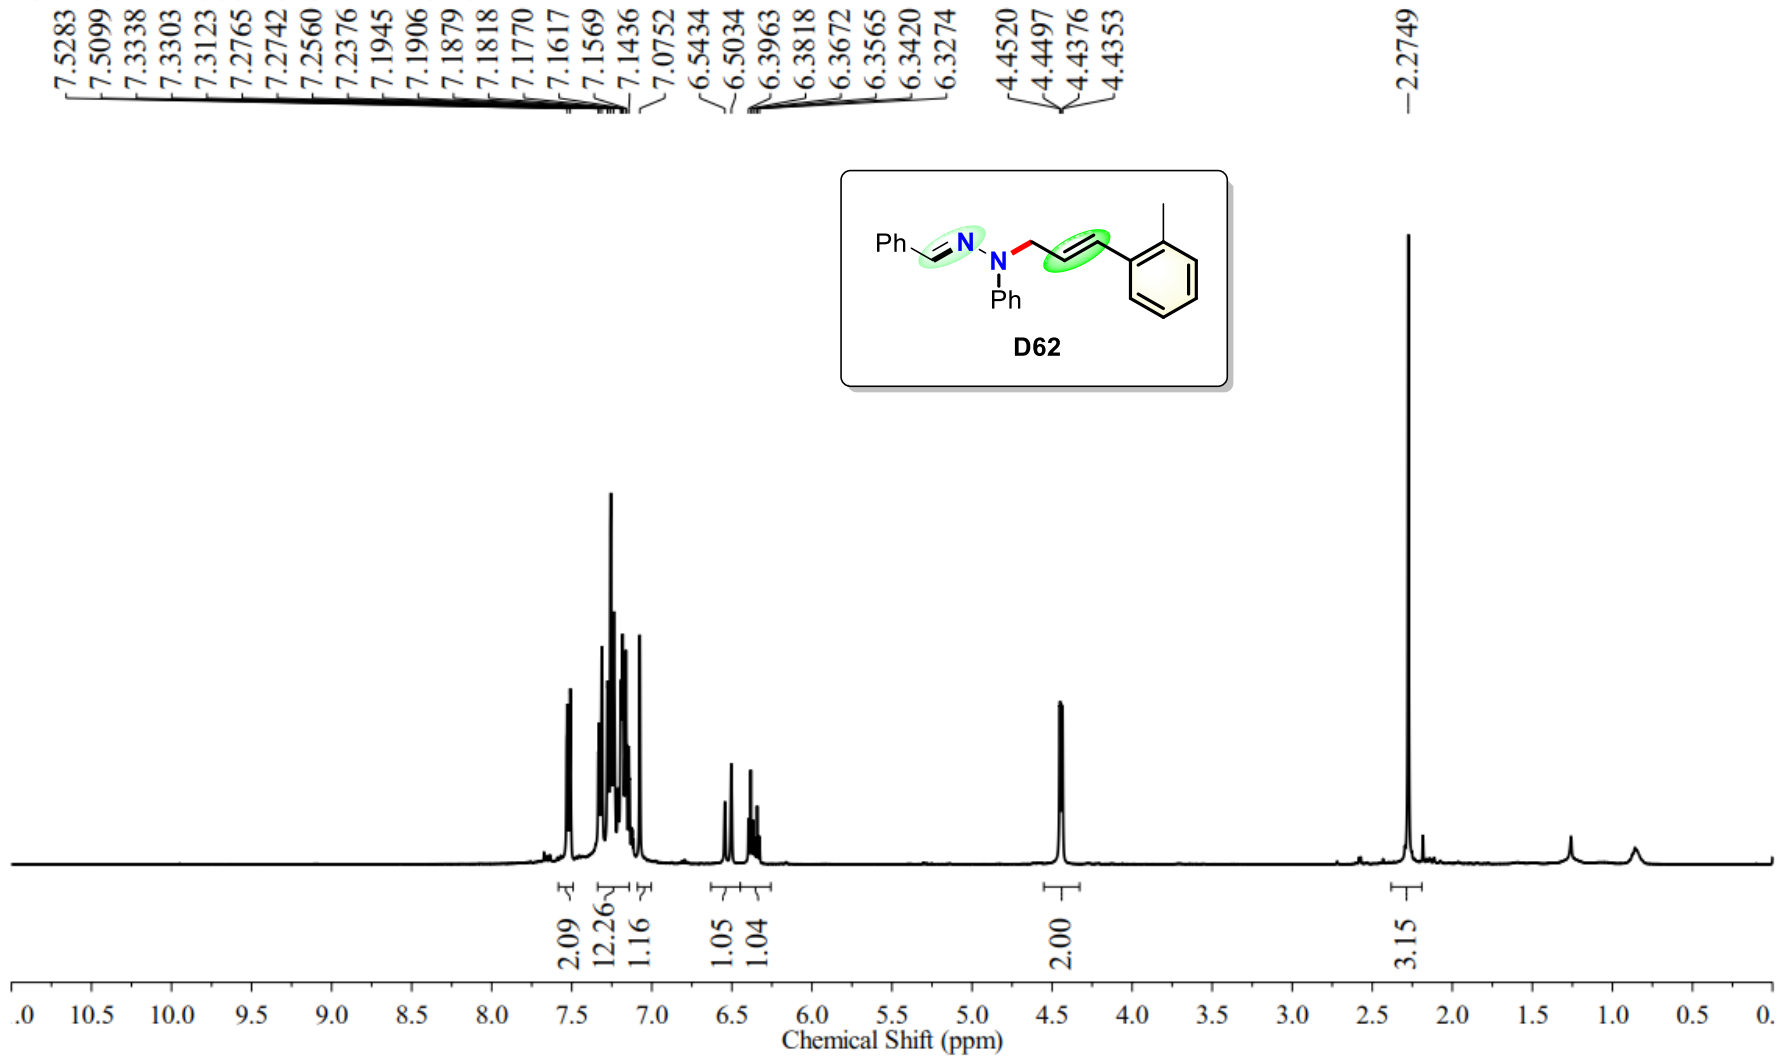

2022-6-14 YY0007-616-L-B4.10.fid

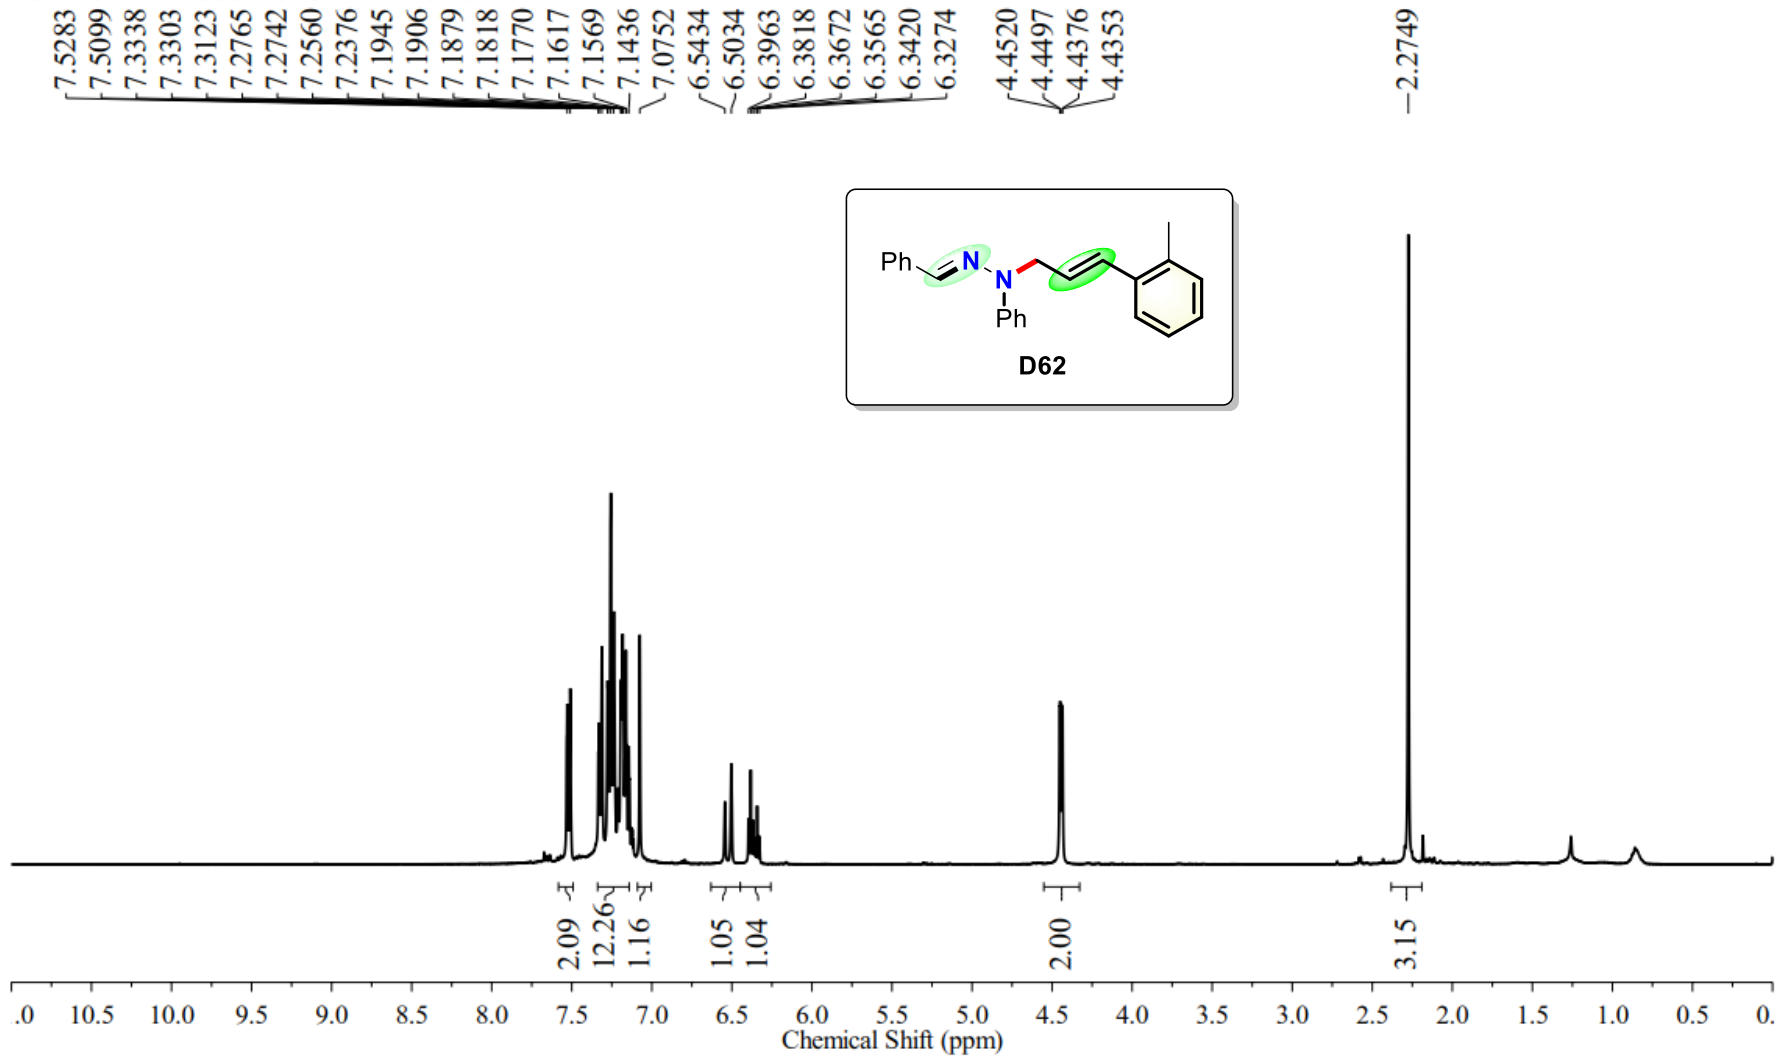

2022-10-28 yy0029 616-lqq-26

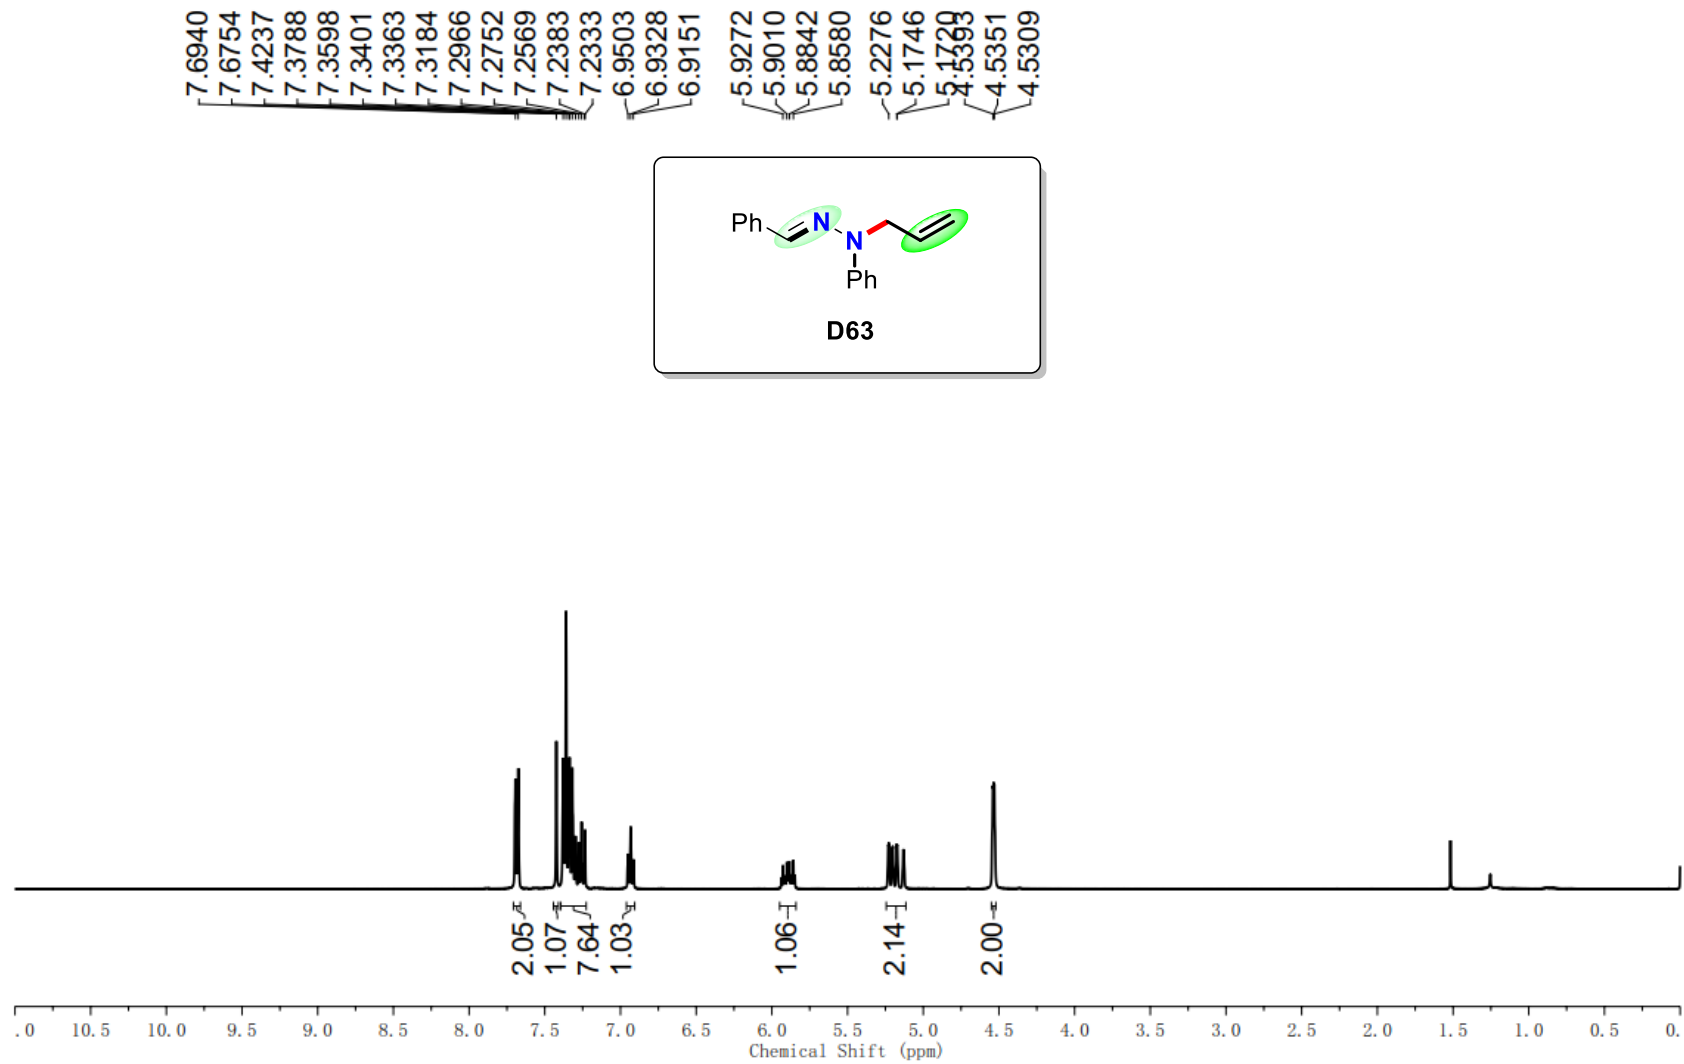

2022-11-08-yy0037-616-d26

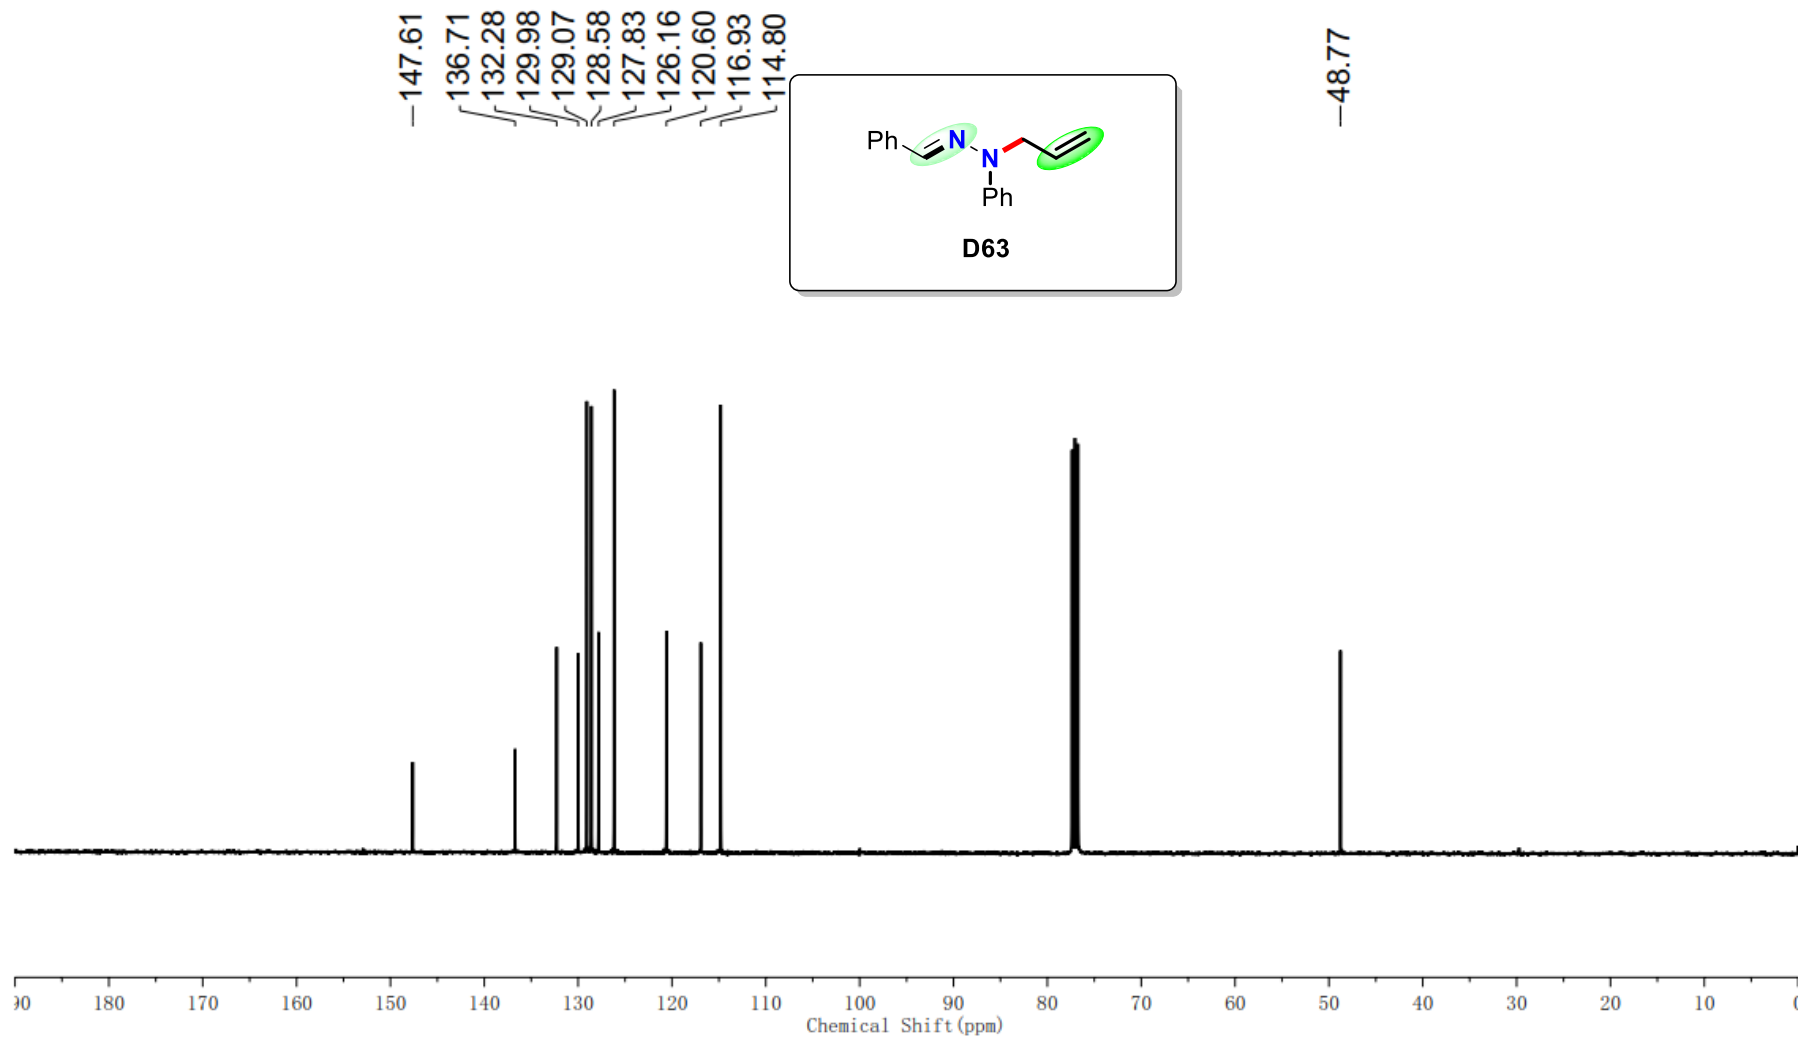

S270

2022-11-7-yy0025-616-d24

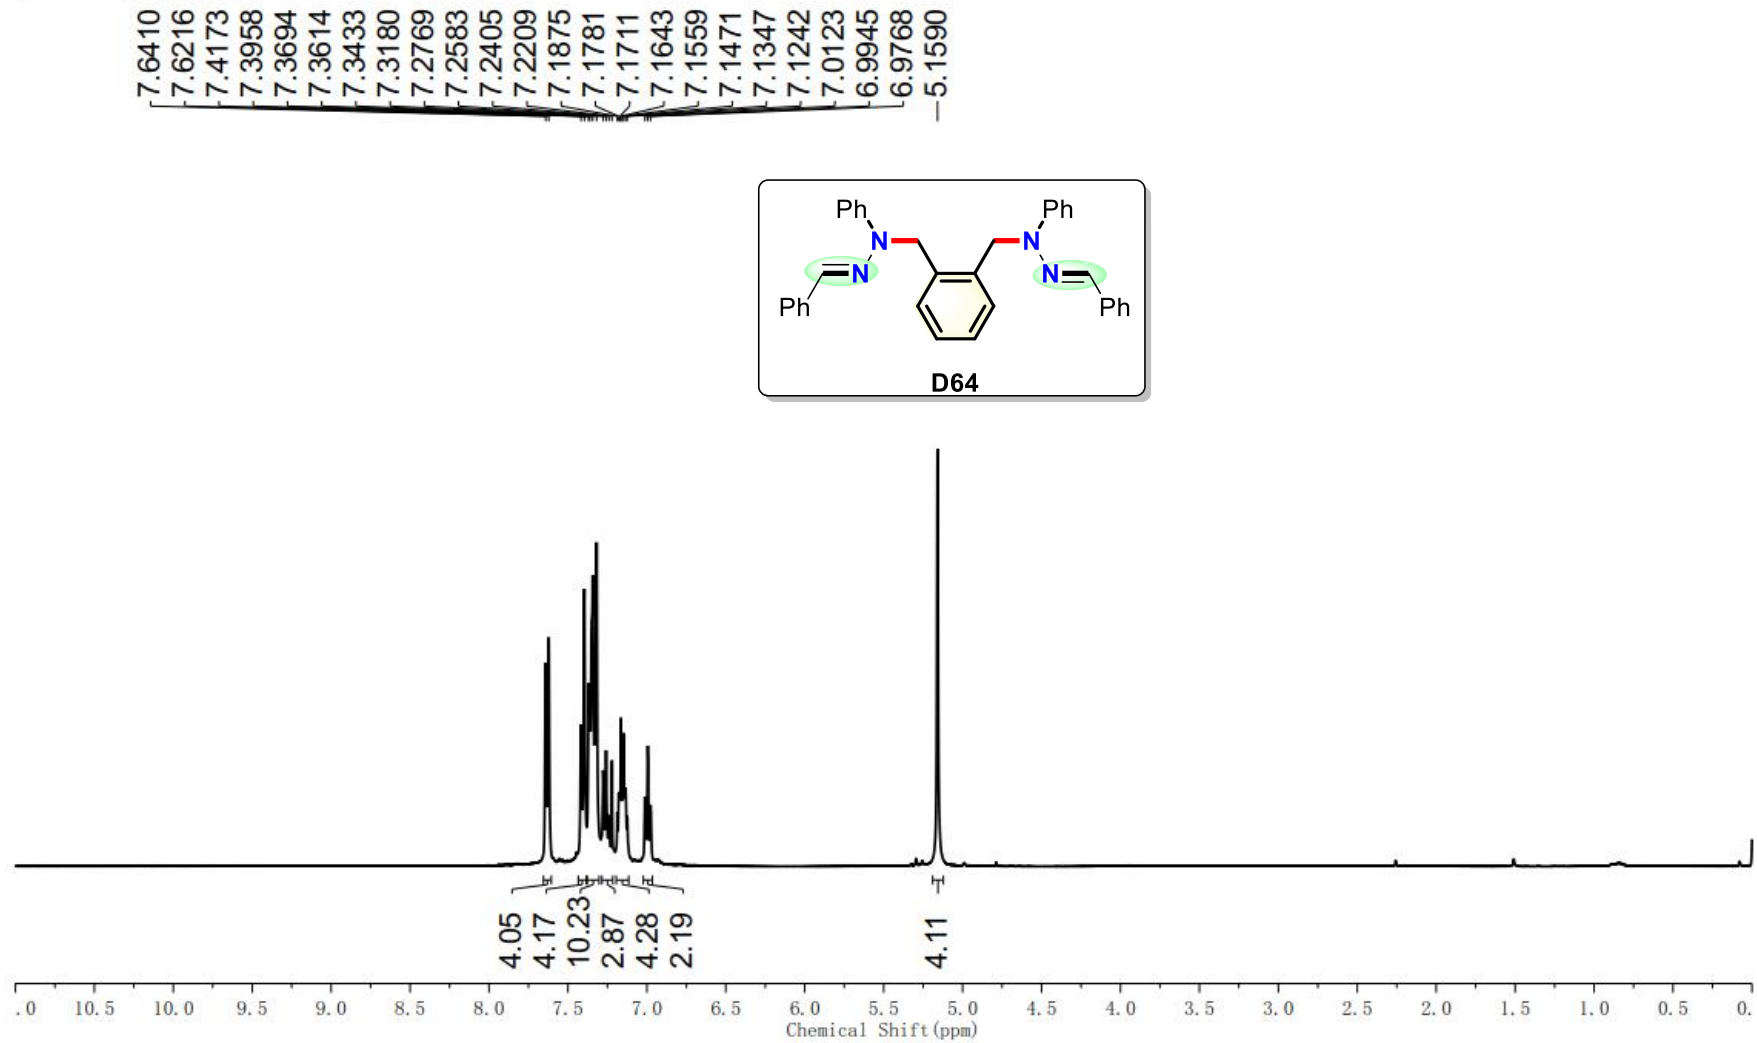

S271

2022-11-17 yy001 616 lqq-24

147.65  
136.29  
132.67  
131.66  
129.34  
128.66  
128.16  
128.13  
126.79  
126.32  
121.34  
115.31

48.60

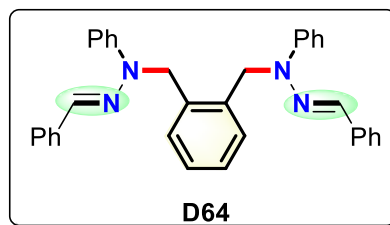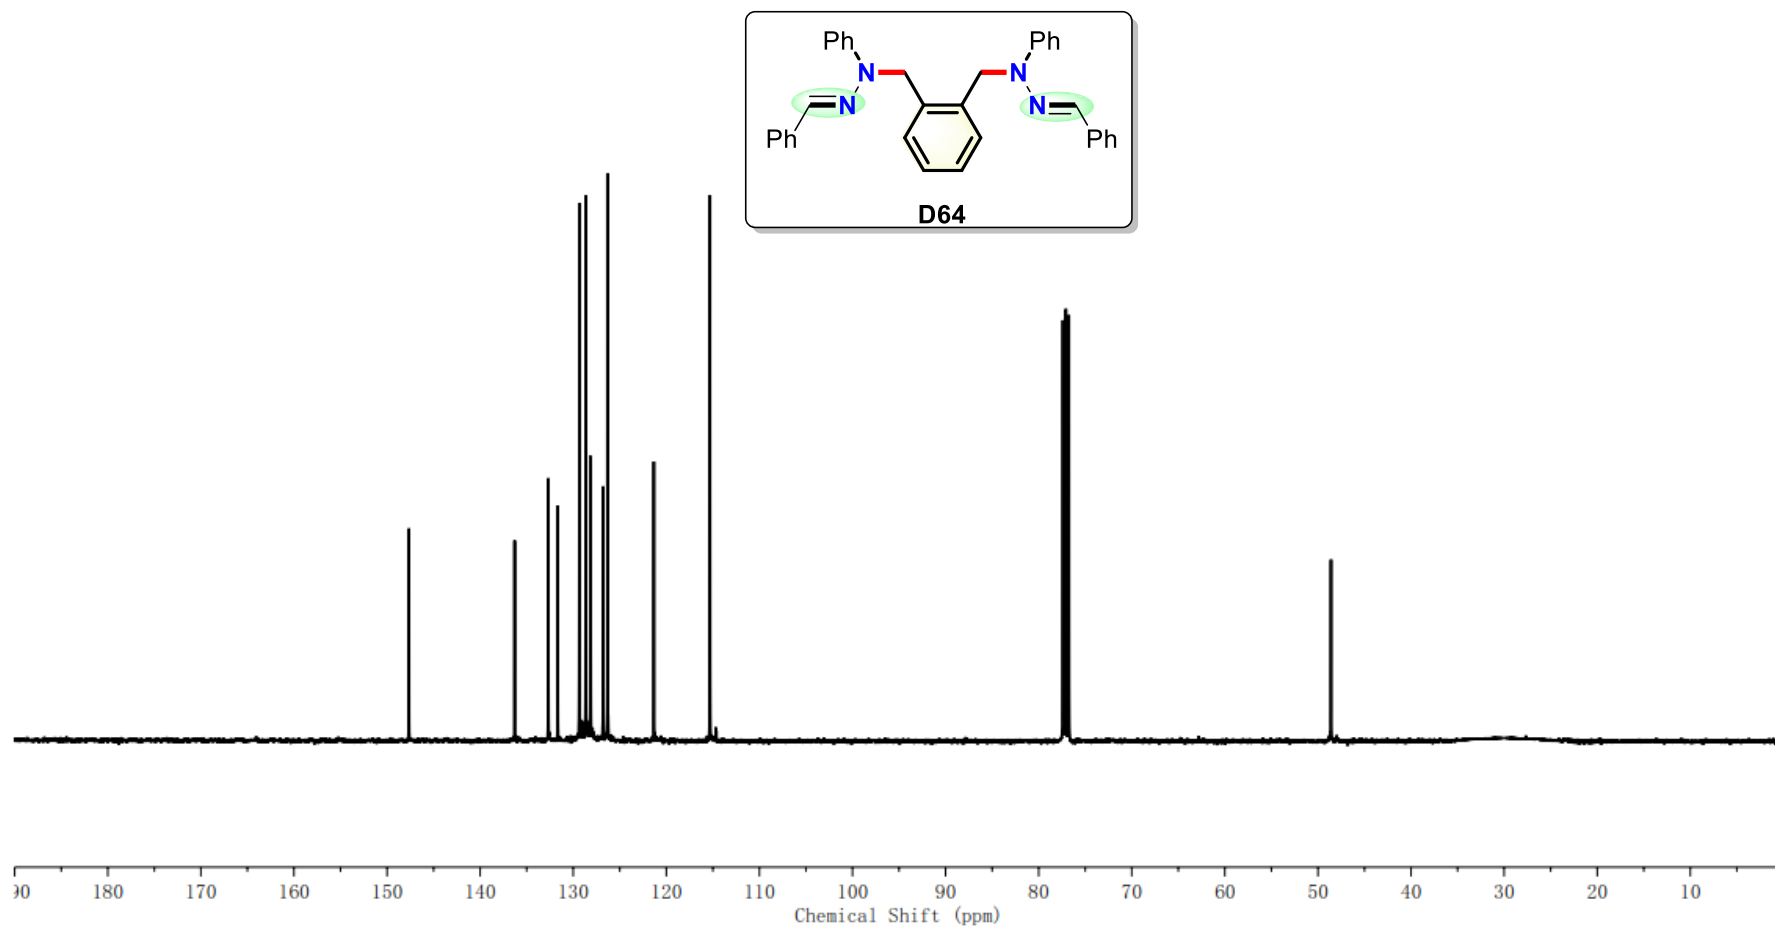



2022-12-6 yy0032 616-lqq-23

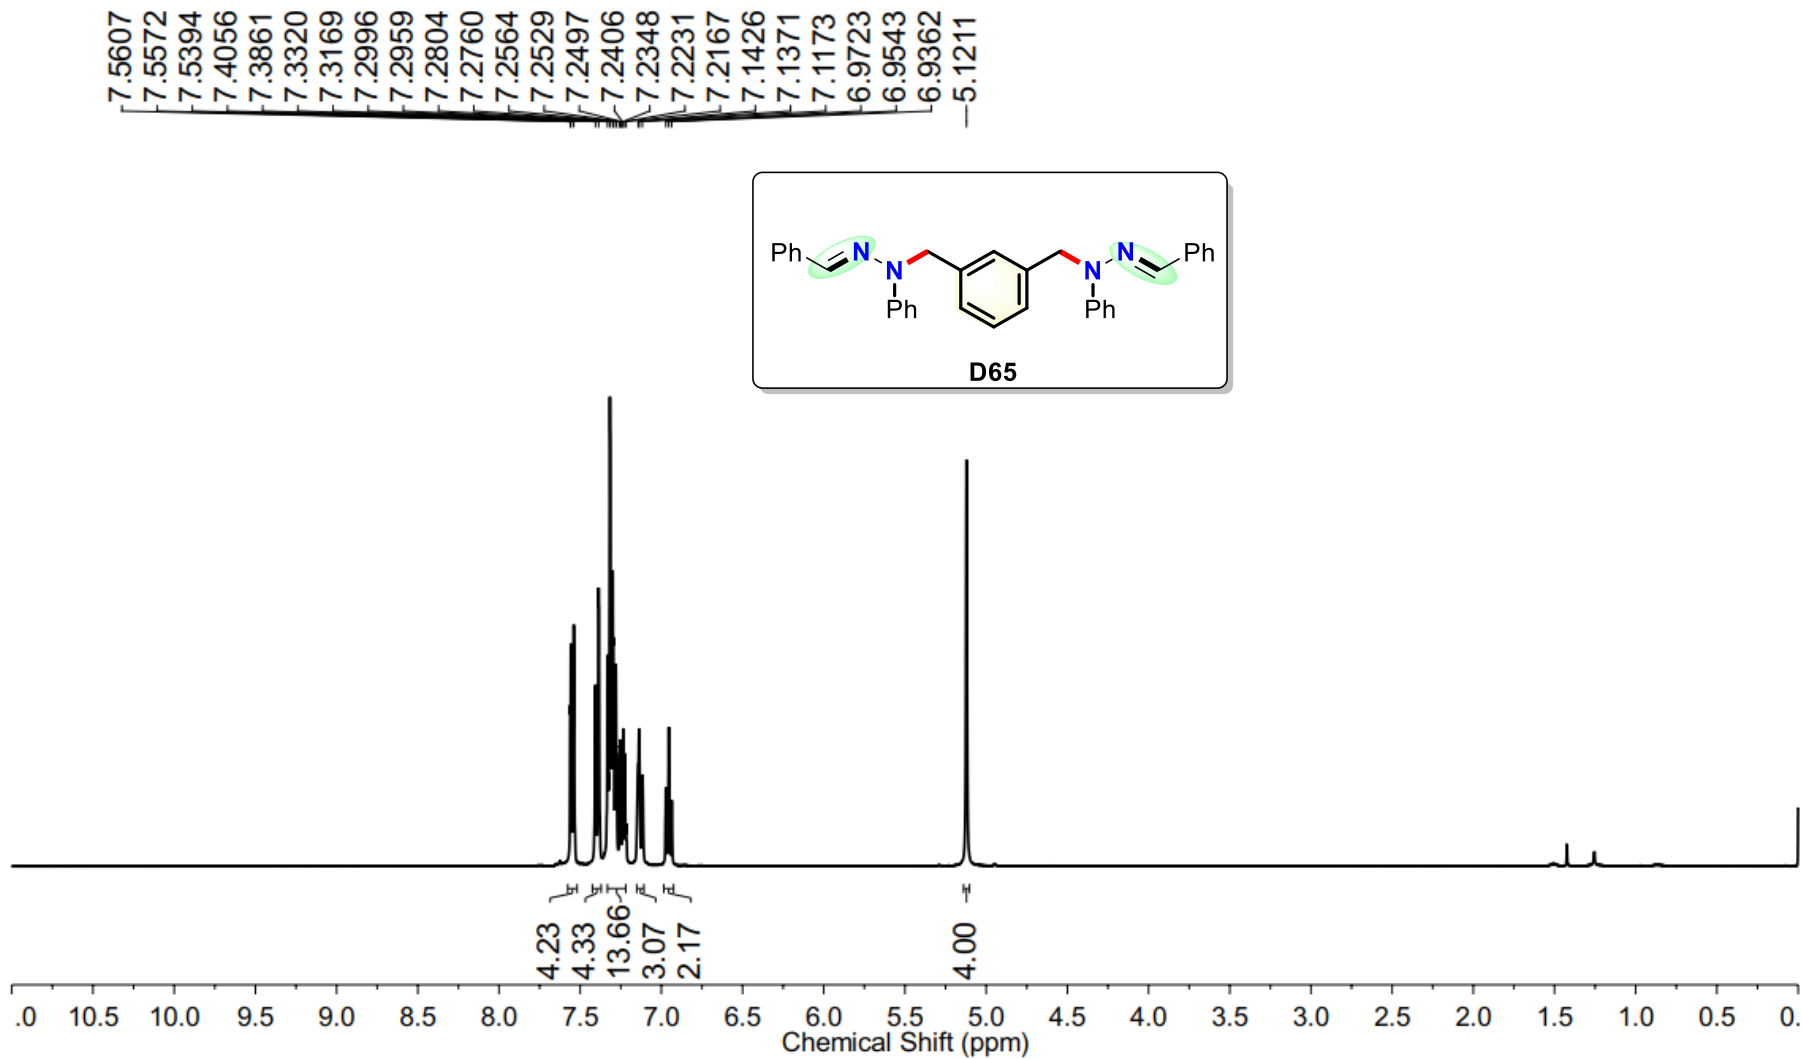

2022-12-7 yy0034 616 1qq-23

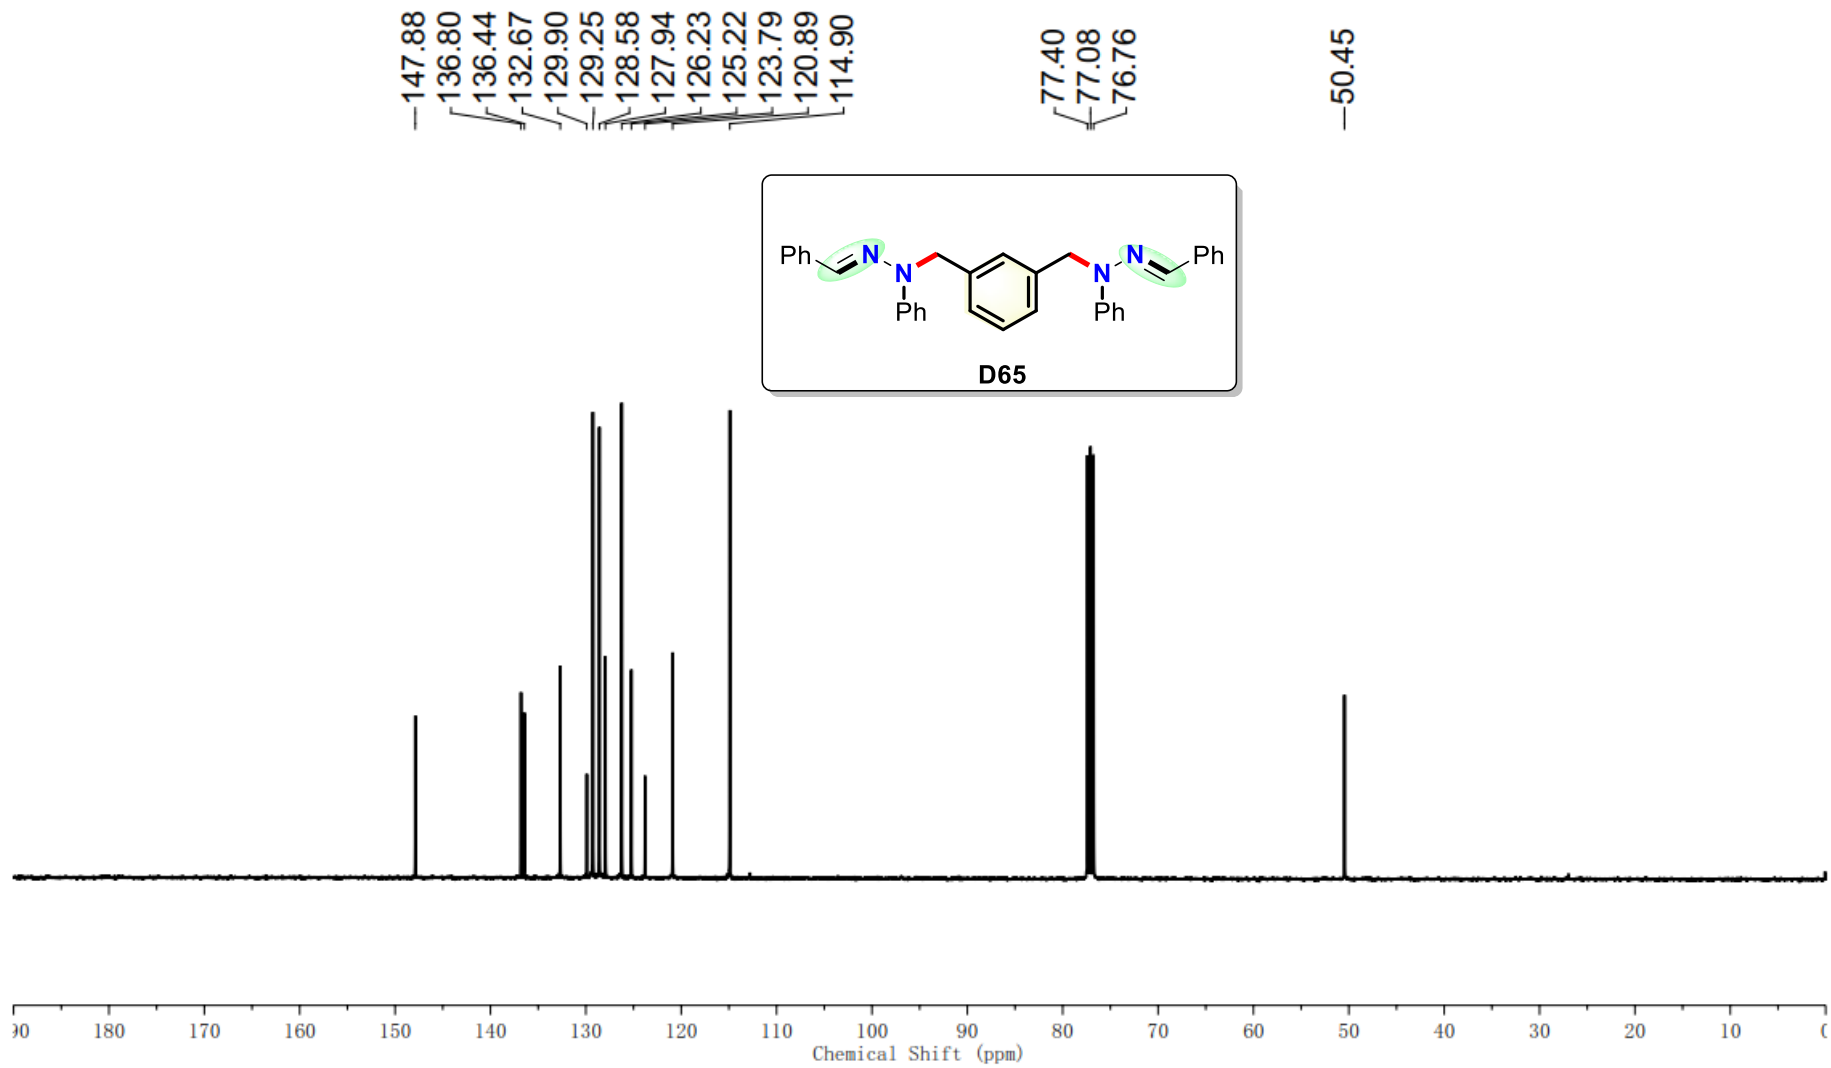

2022-11-28-yy0014-616-lqq-f2

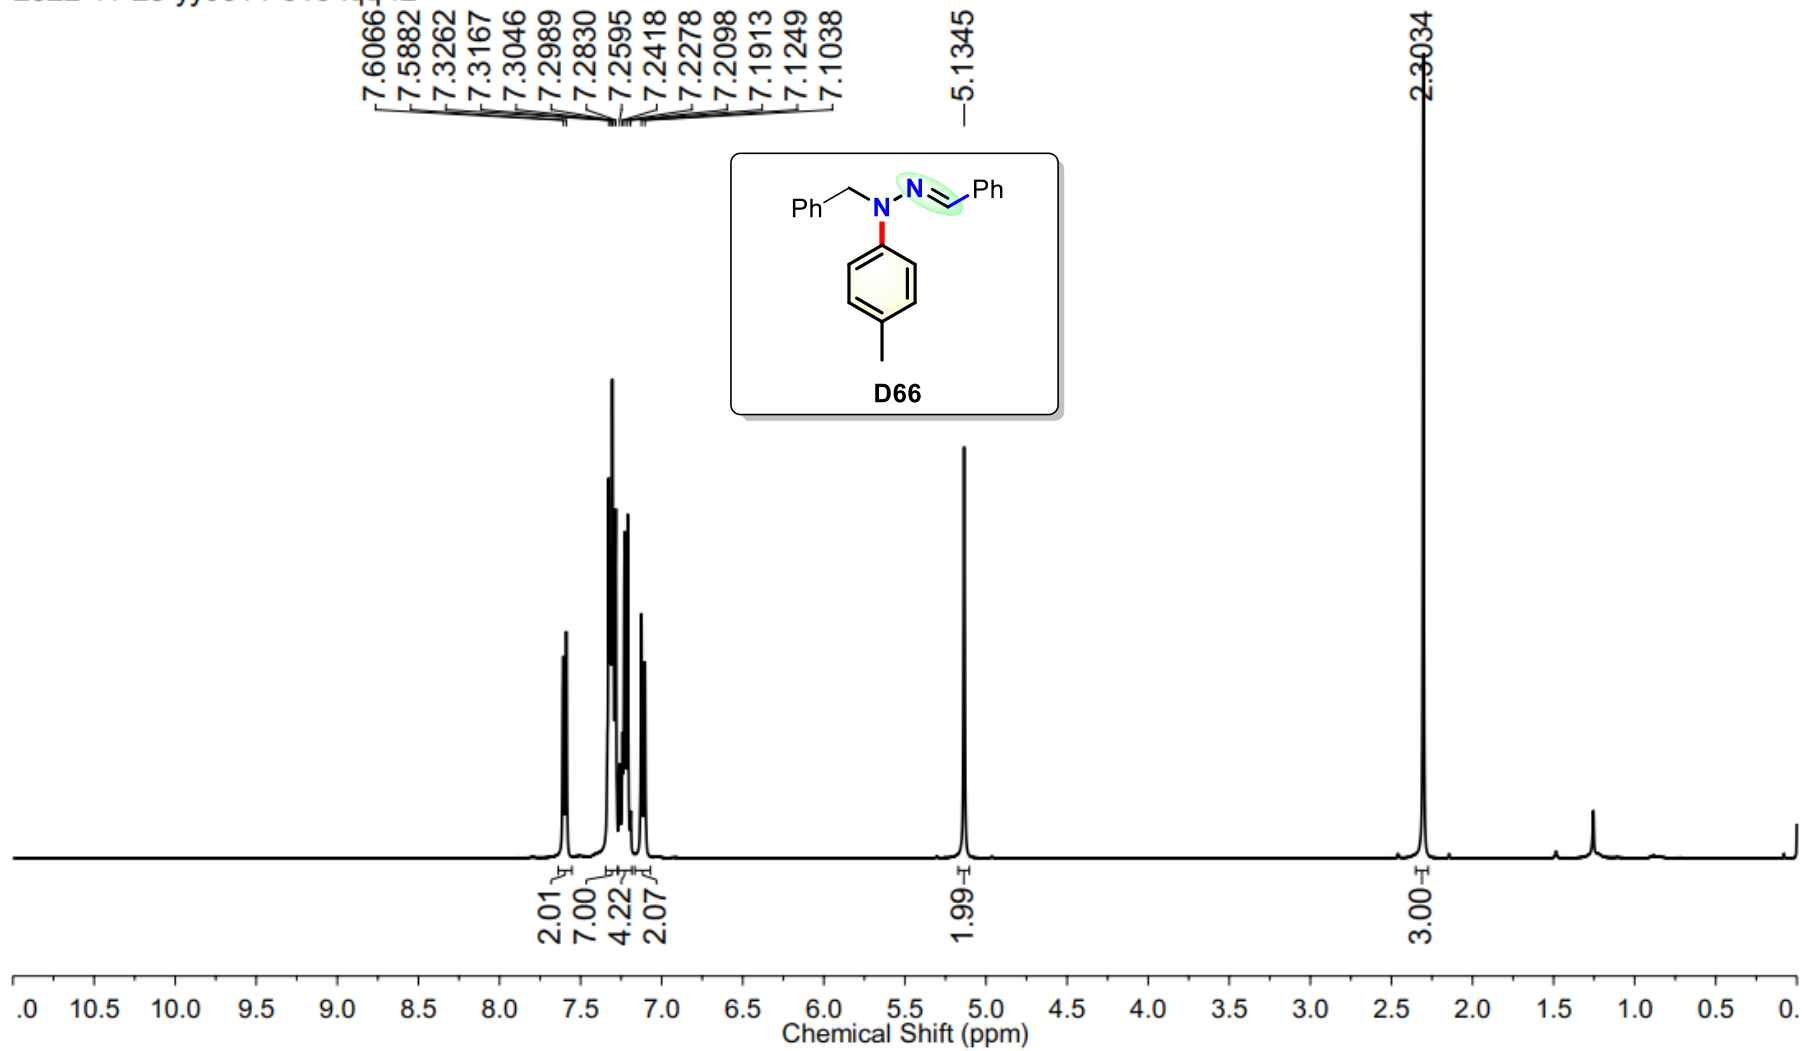

2022-12-02-yy0013-616-lqq-f2

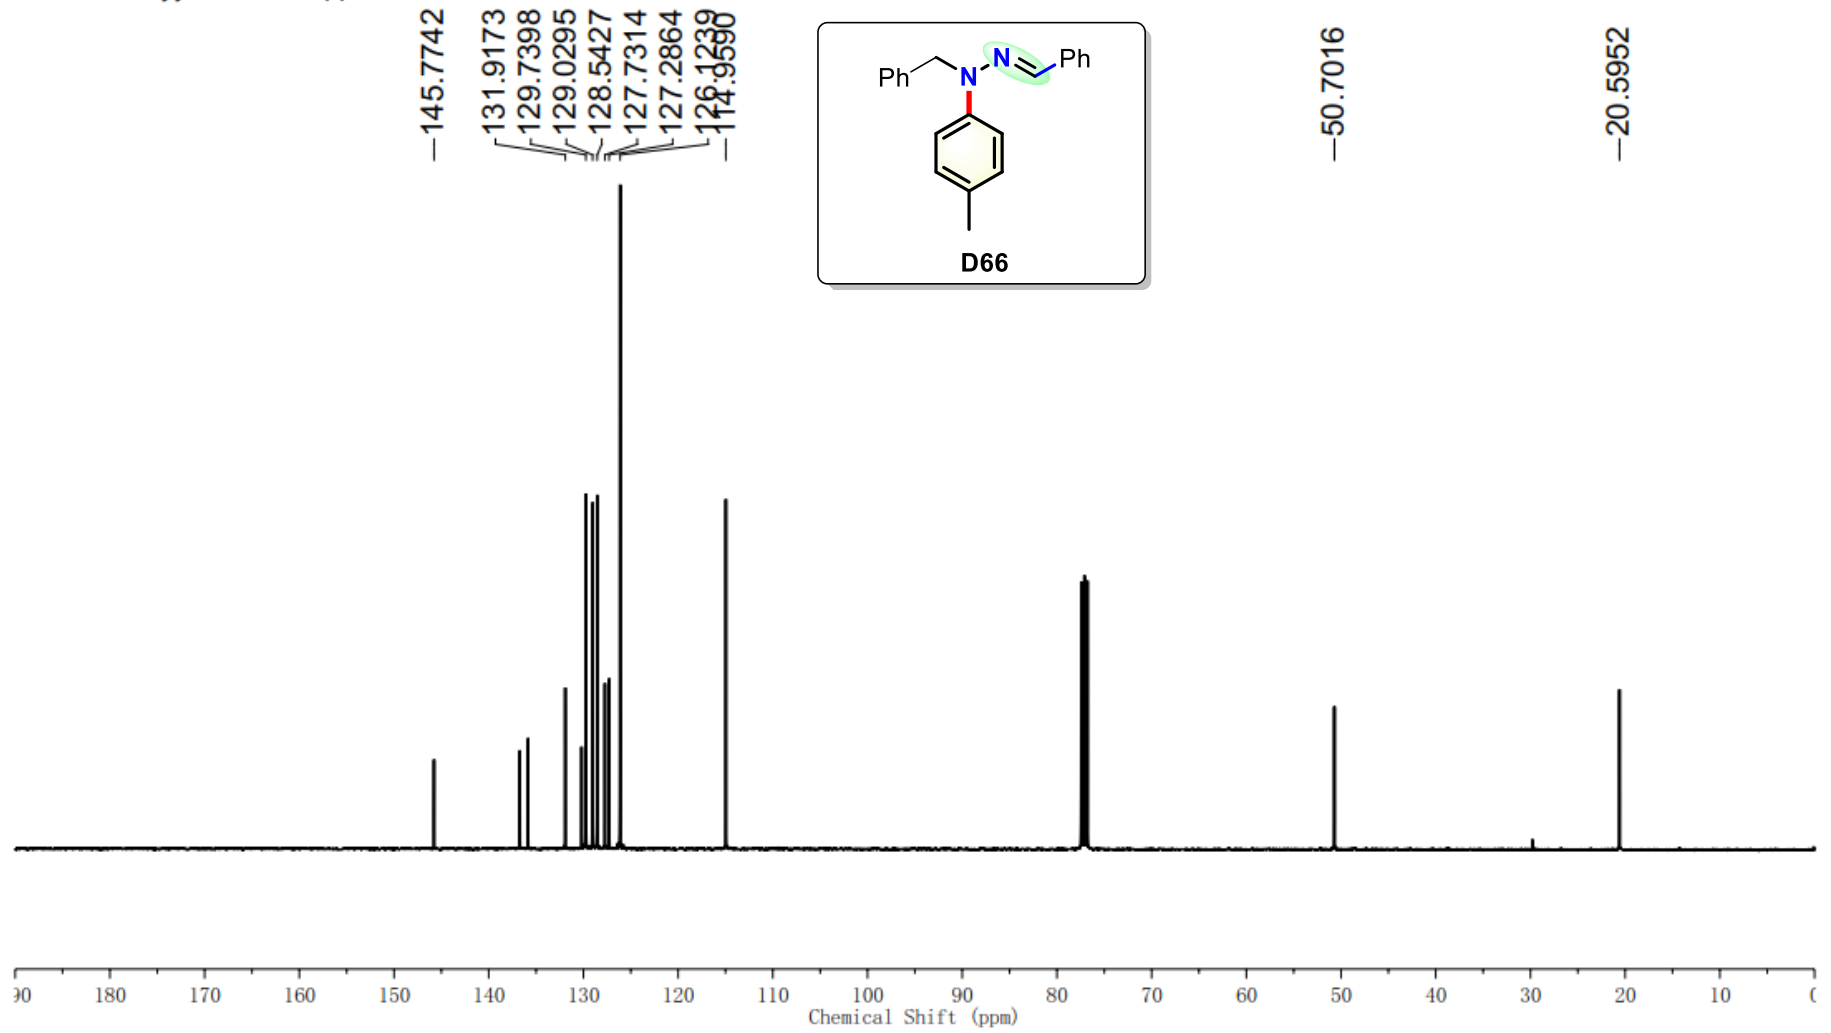

2022-10-21 YY0018 616-LQQ-F9

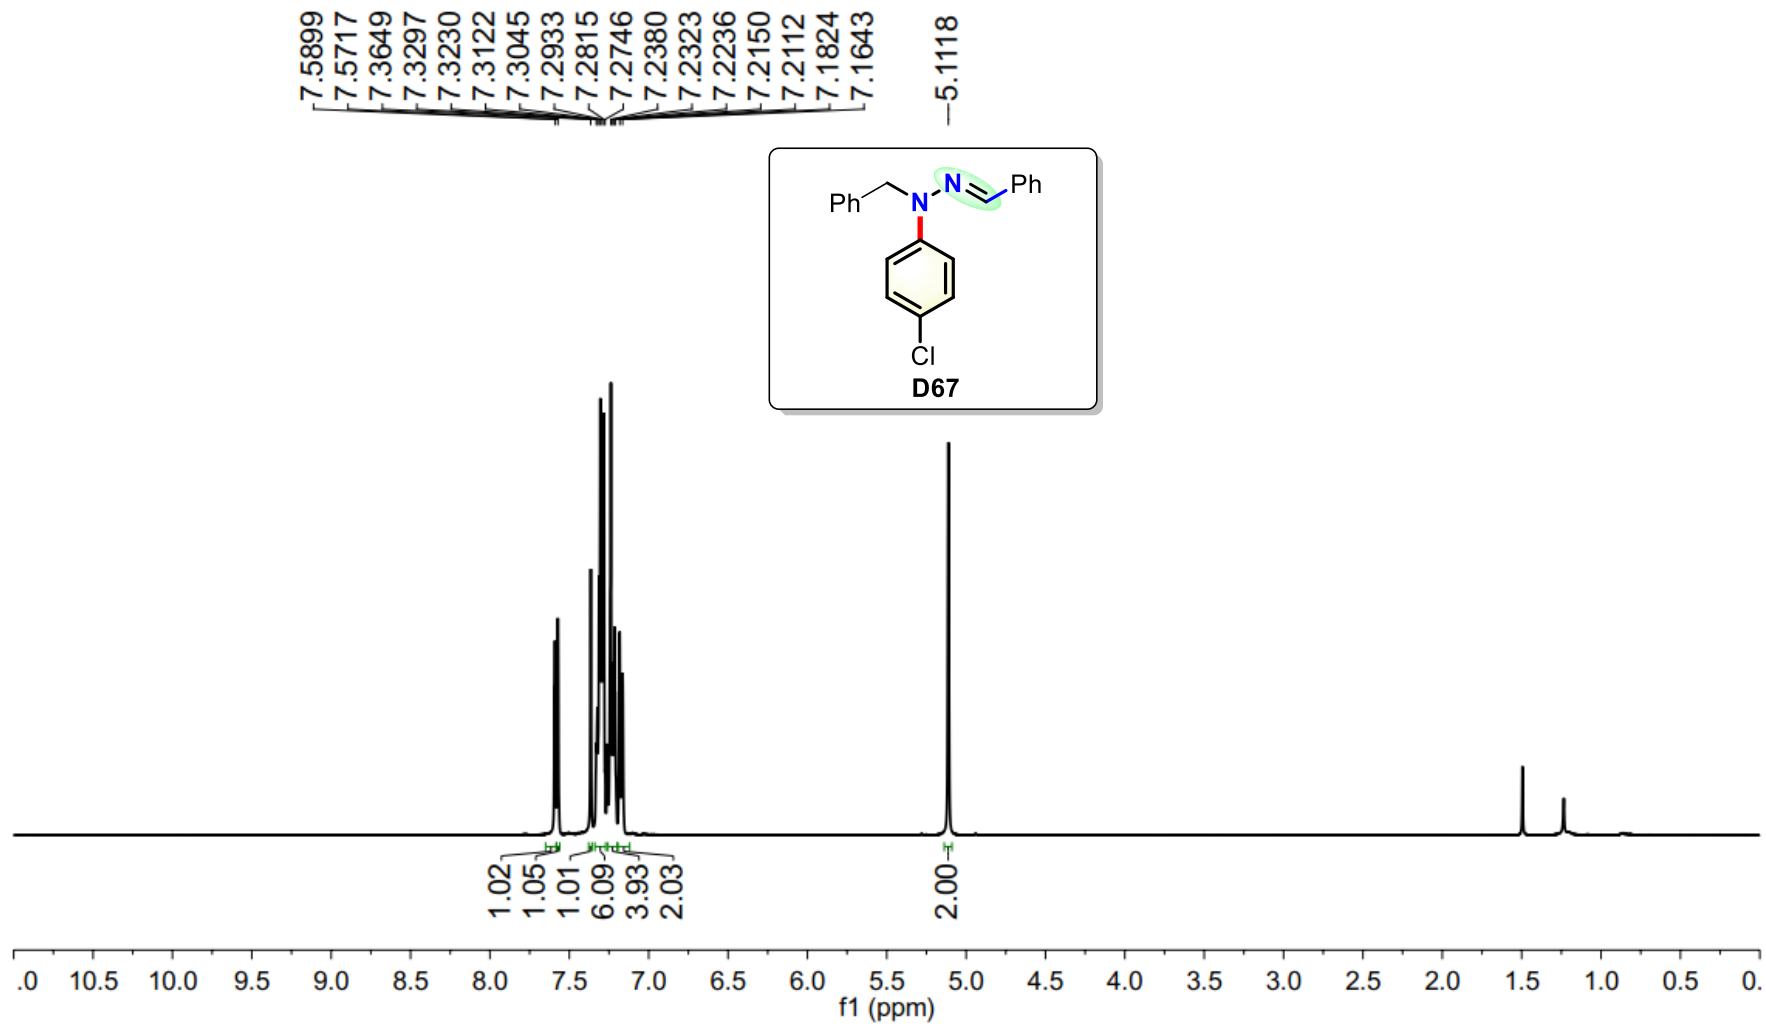

2022-10-26 yy0025 616 LQQ-9

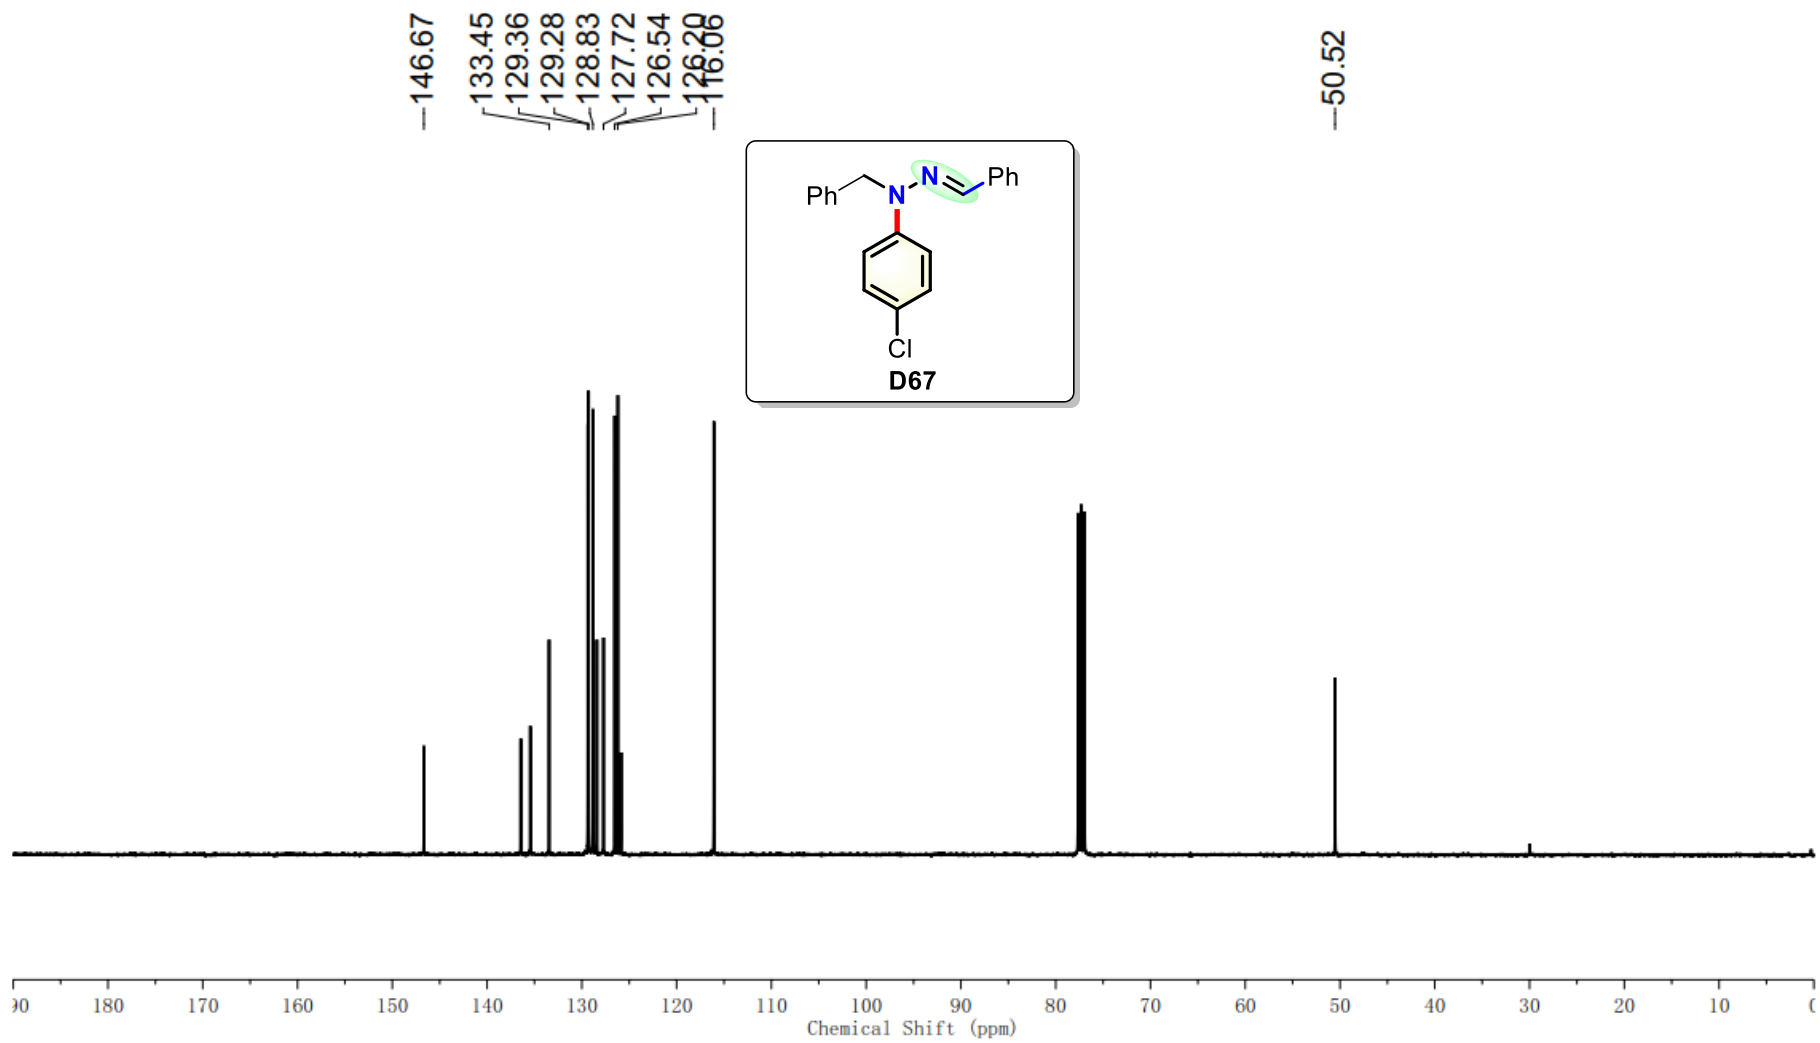

2022-10-13 yy0007 616-1qq-F13

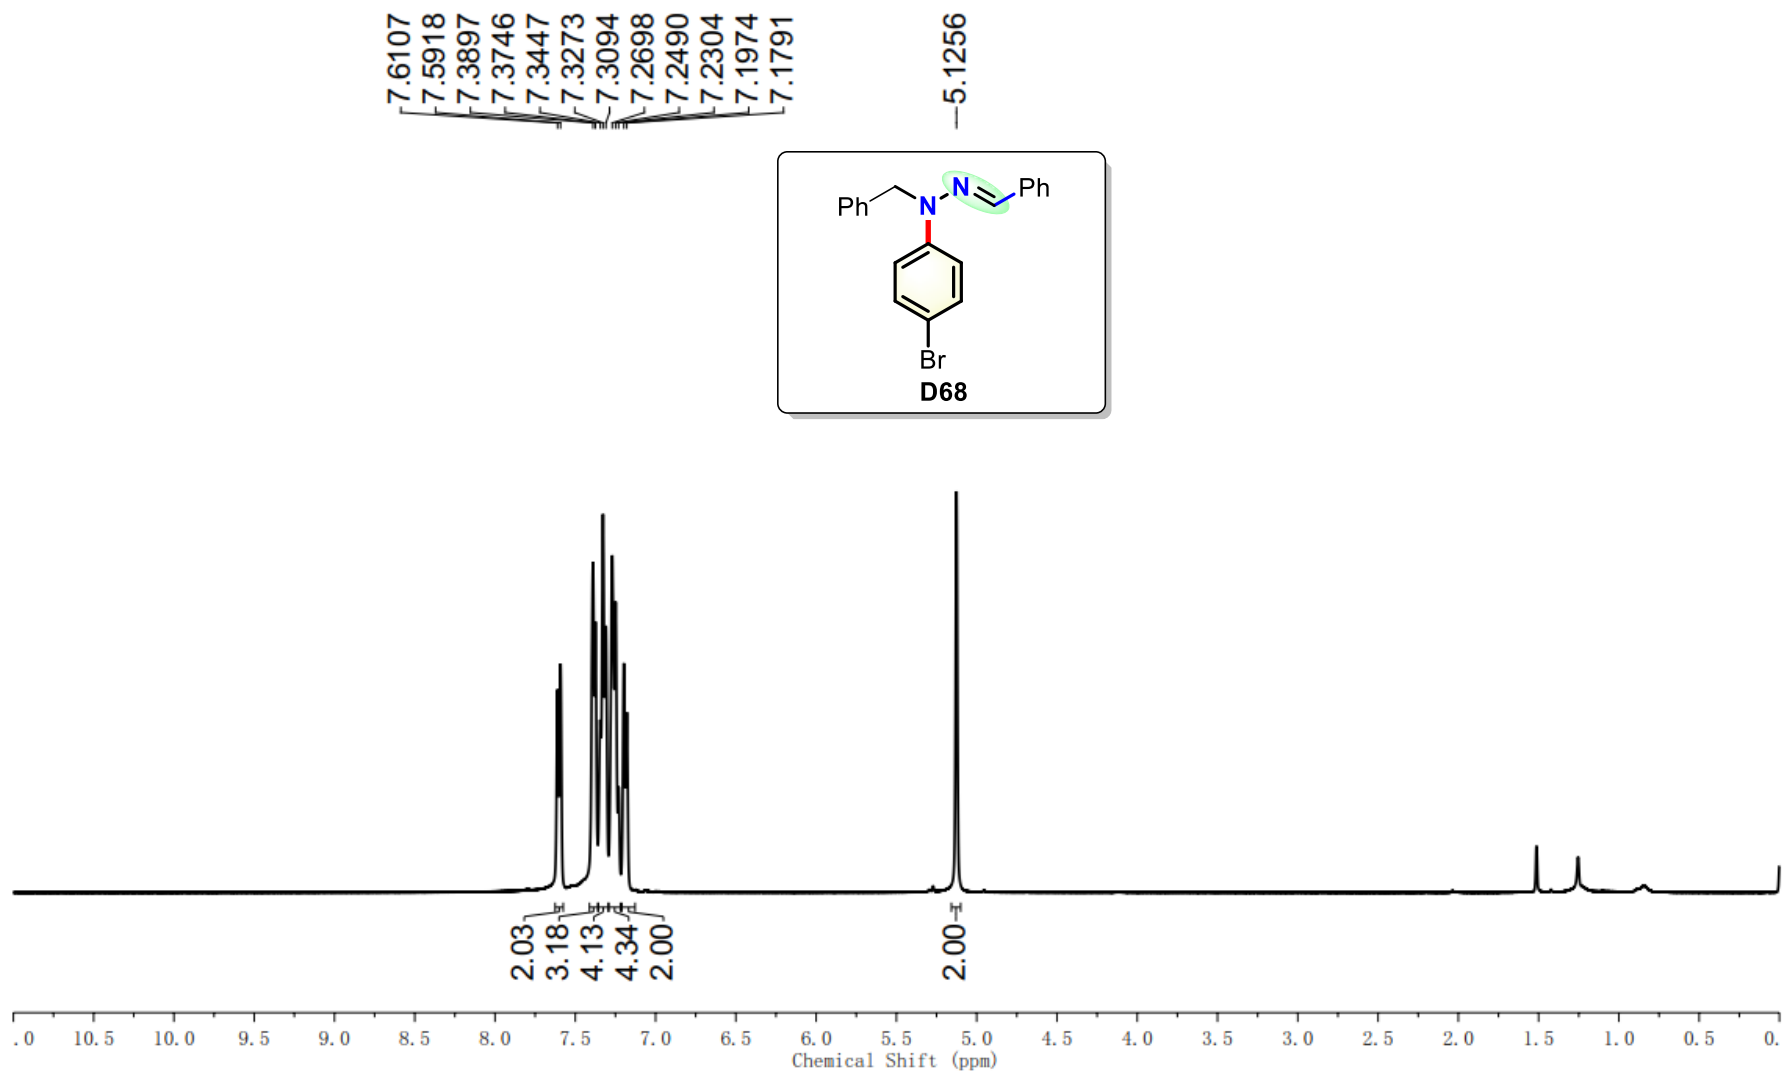

2022-11-7-yy0026-616-f13

146.87  
133.35  
131.96  
129.13  
128.60  
127.50  
126.33  
125.97  
116.26  
113.01

77.38  
77.07  
76.75

50.18

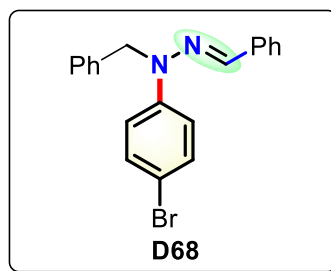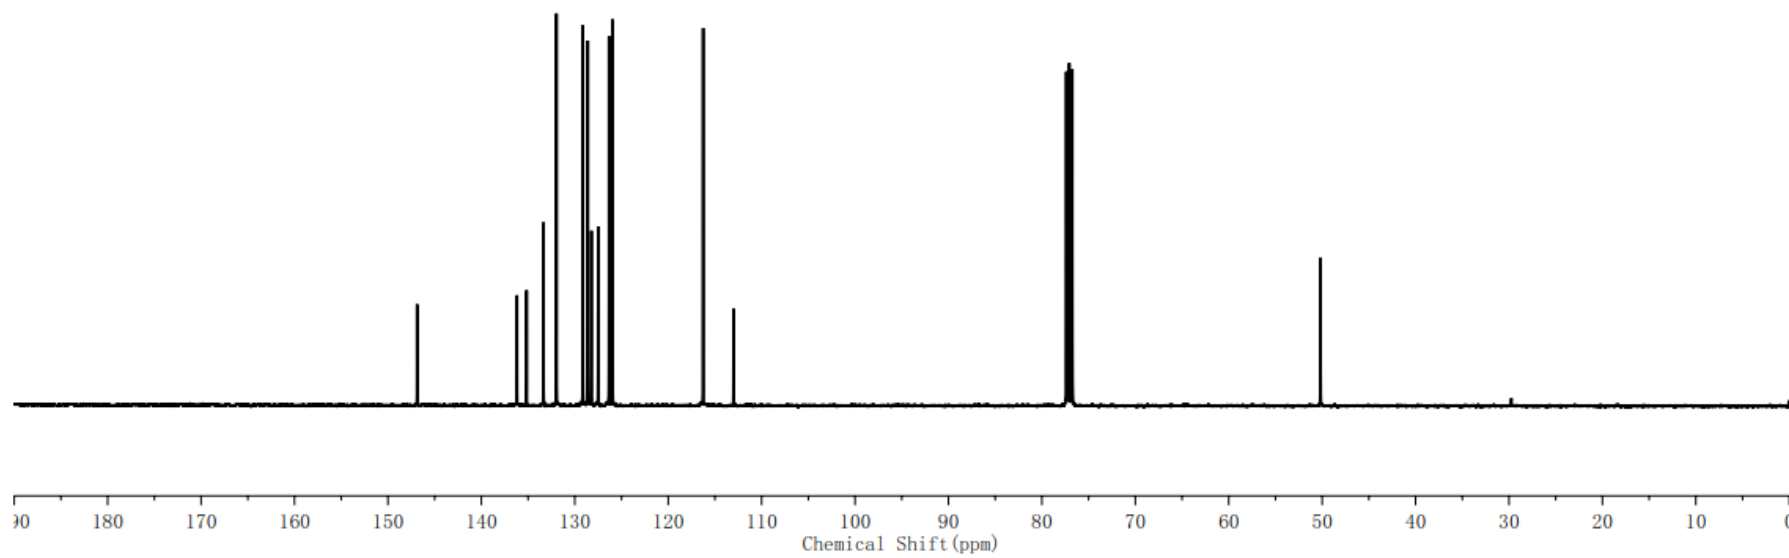

S280



2022-10-21 YY0018 616-LQ-F3

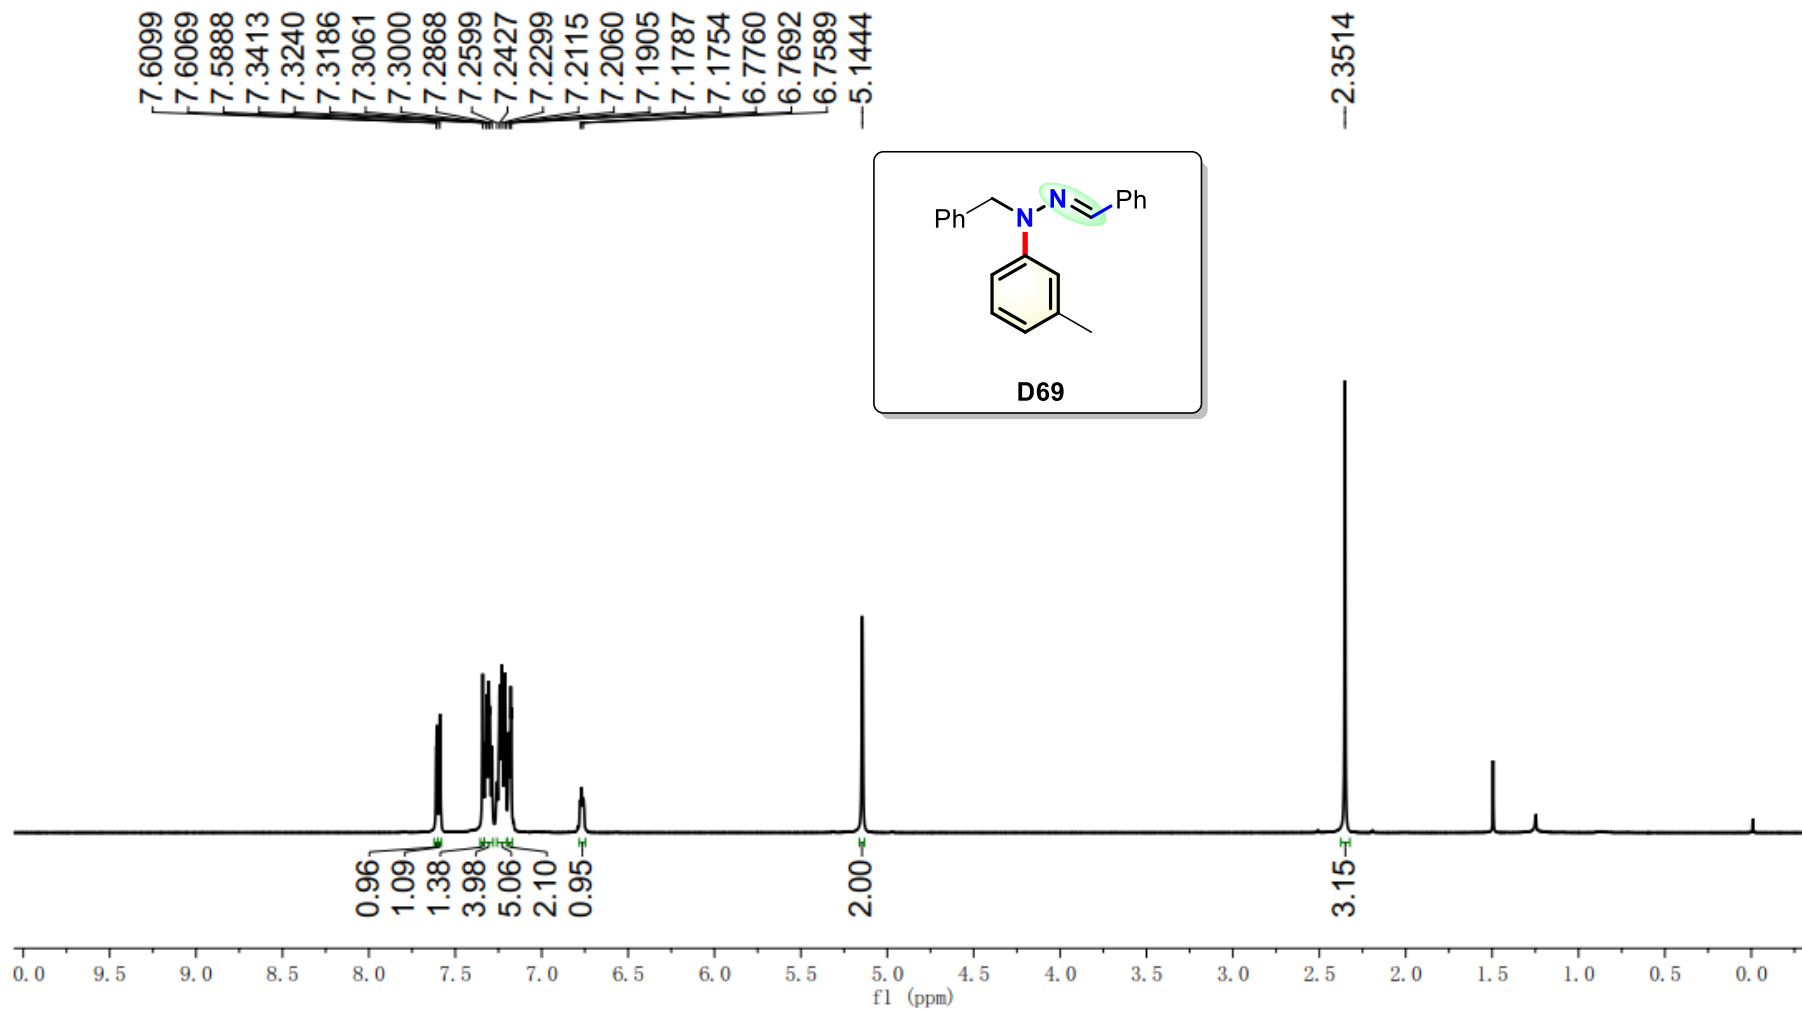

2022-10-26 yy0025 616 LQQ-3

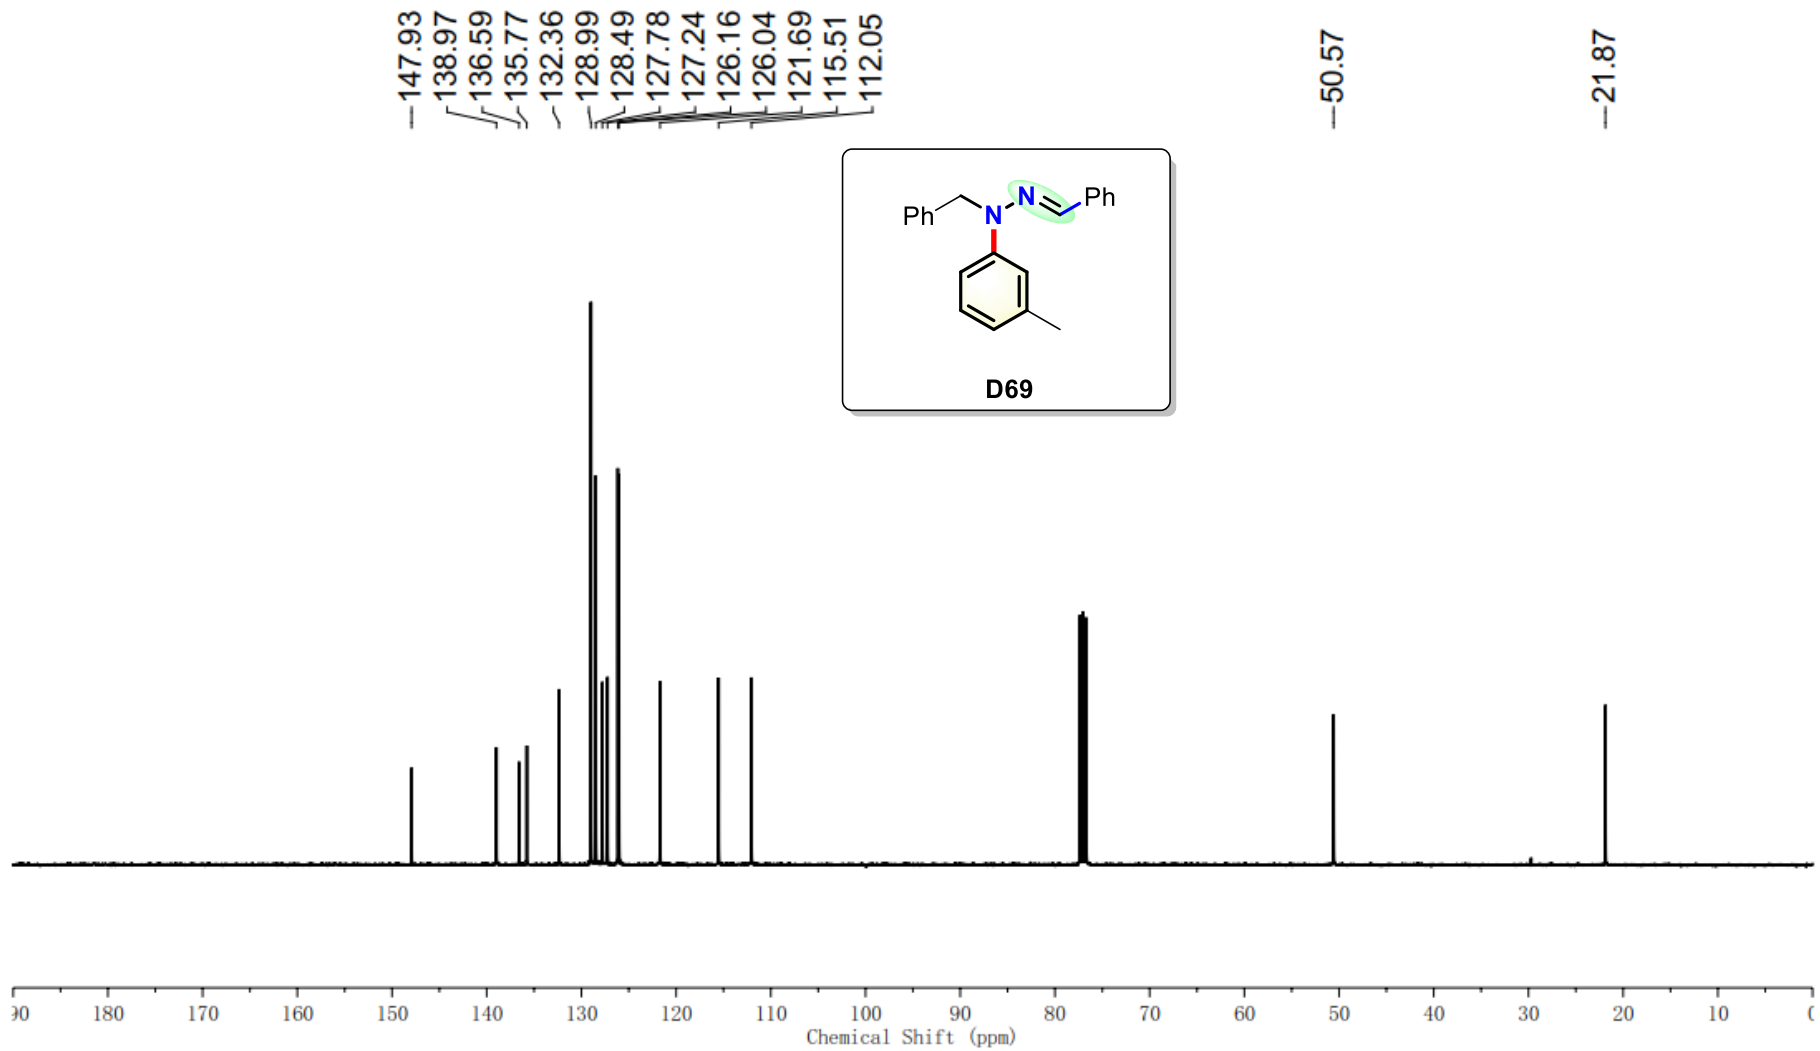

2022-10-17-YY0007-616-ZGH-f6

7.6257  
7.6071  
7.4103  
7.3505  
7.3331  
7.3151  
7.2505  
7.2118  
7.1930  
7.0486  
7.0280  
6.6439  
6.6239  
6.6038  
-5.1454

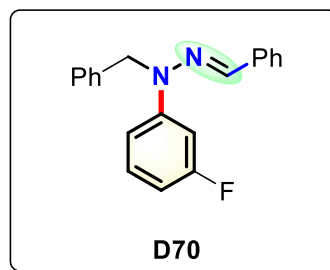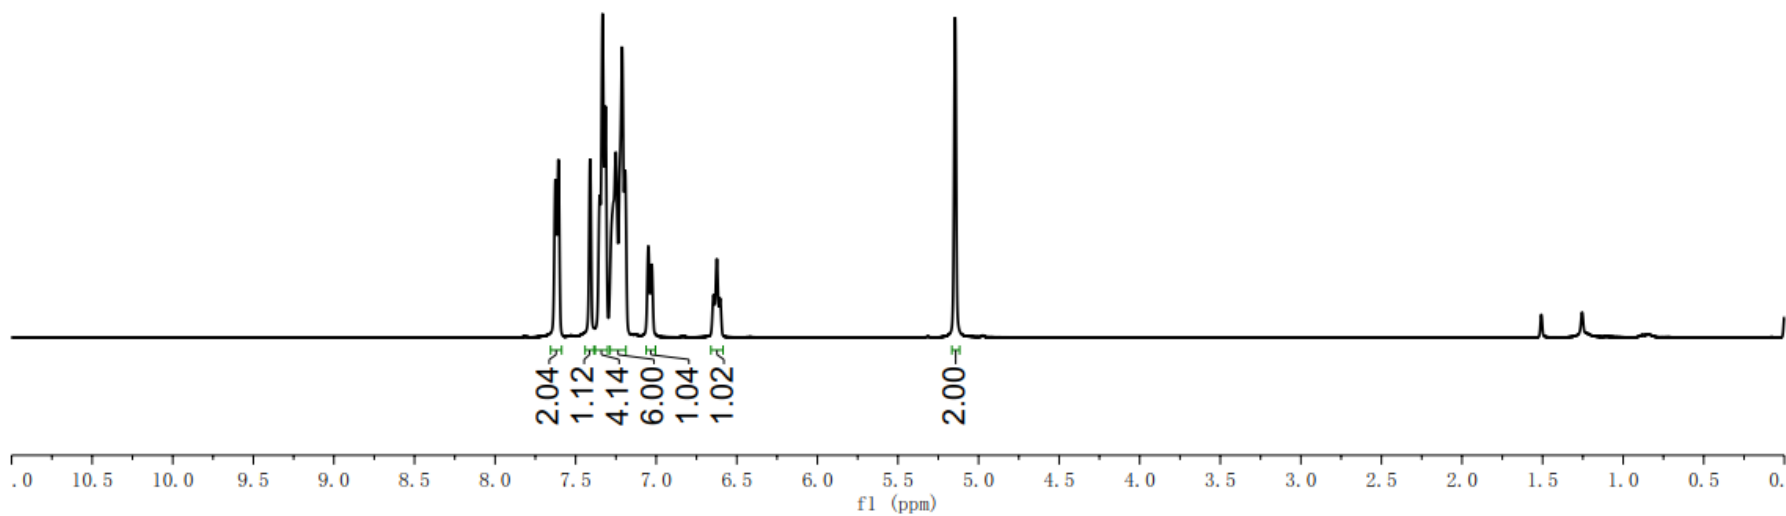

S283

2022-11-08-yy0037-616-f6

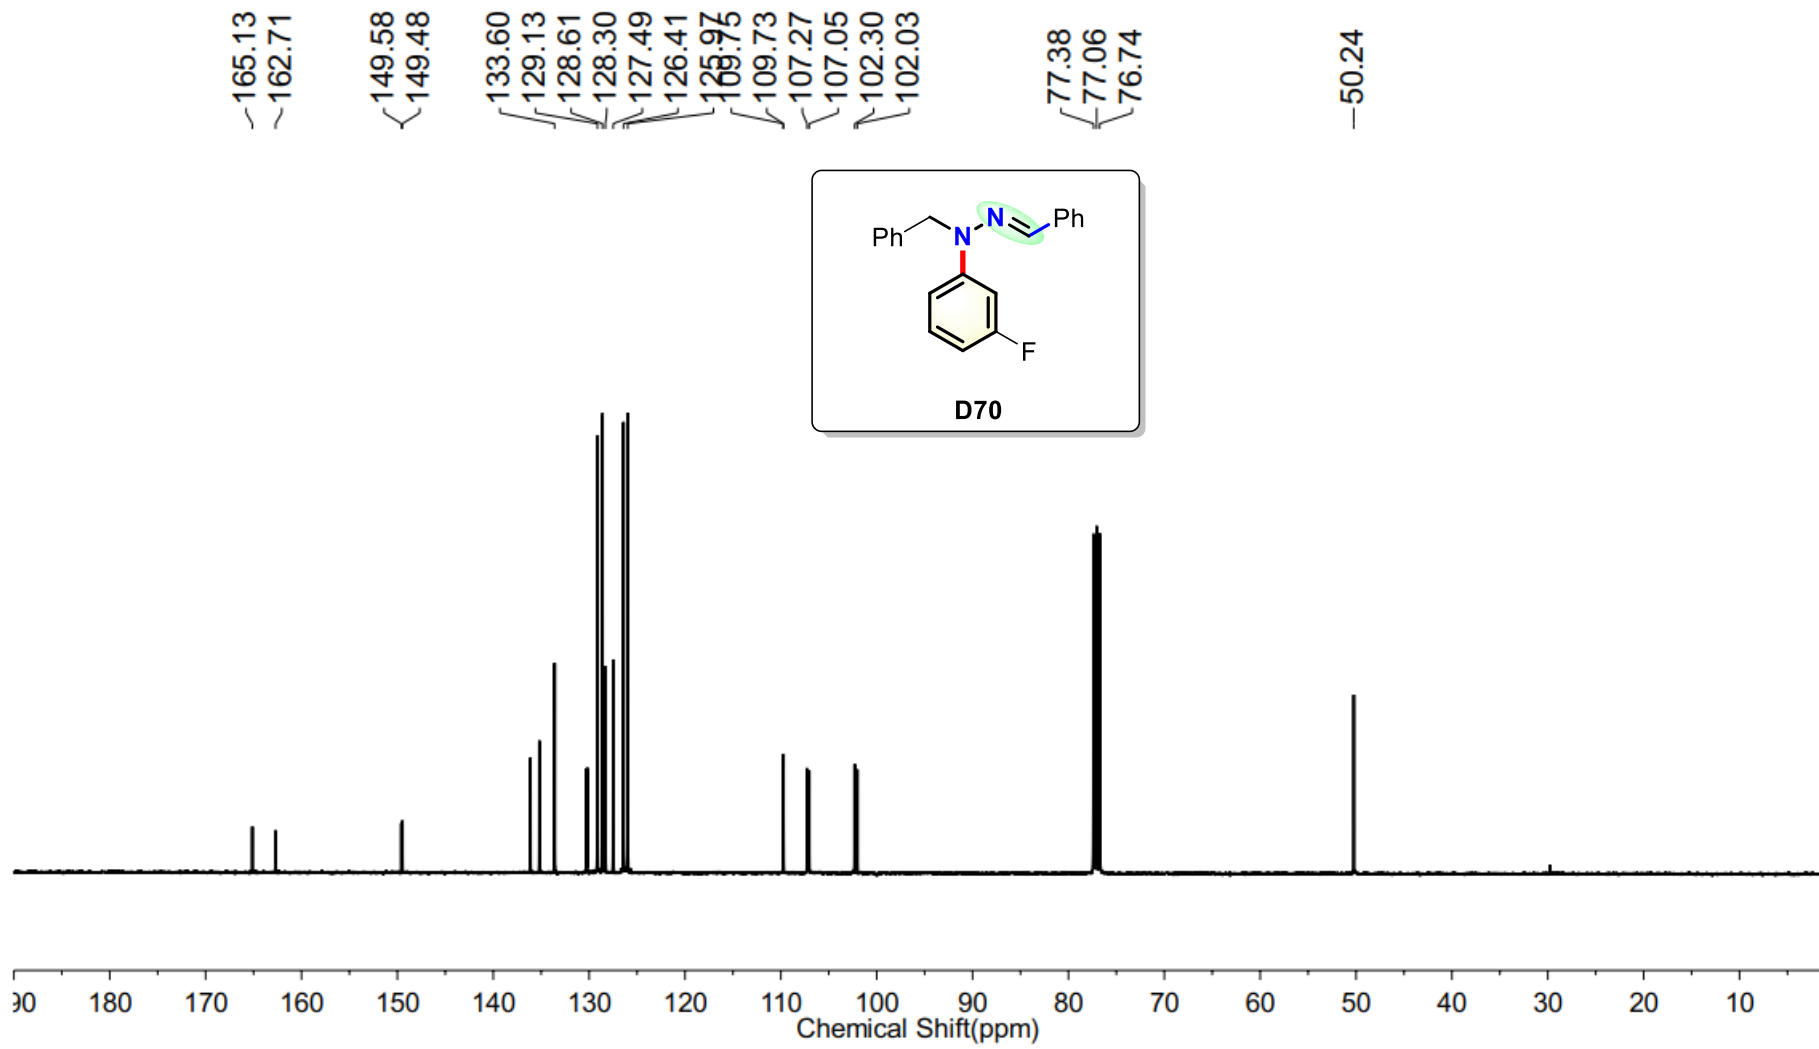

2022-12-7 yy0035 616-1qq-6

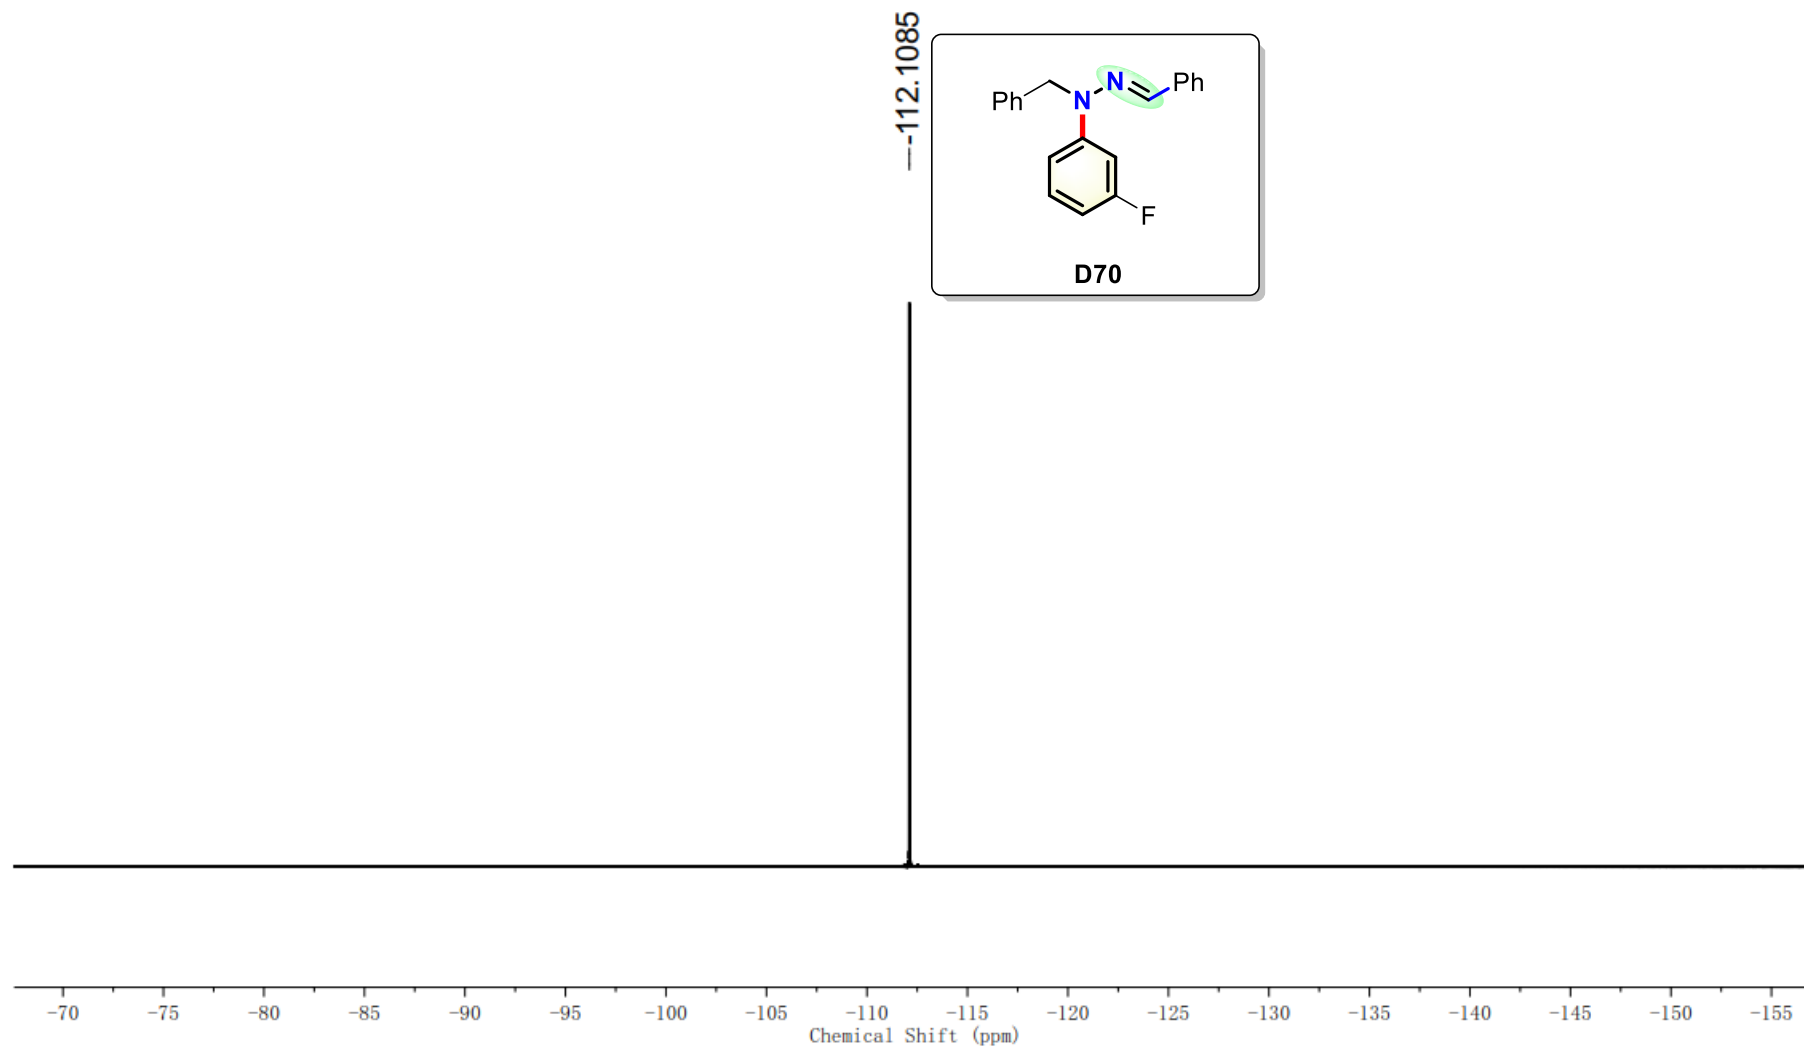

S285

2022-10-27 yy0018 616-lq15

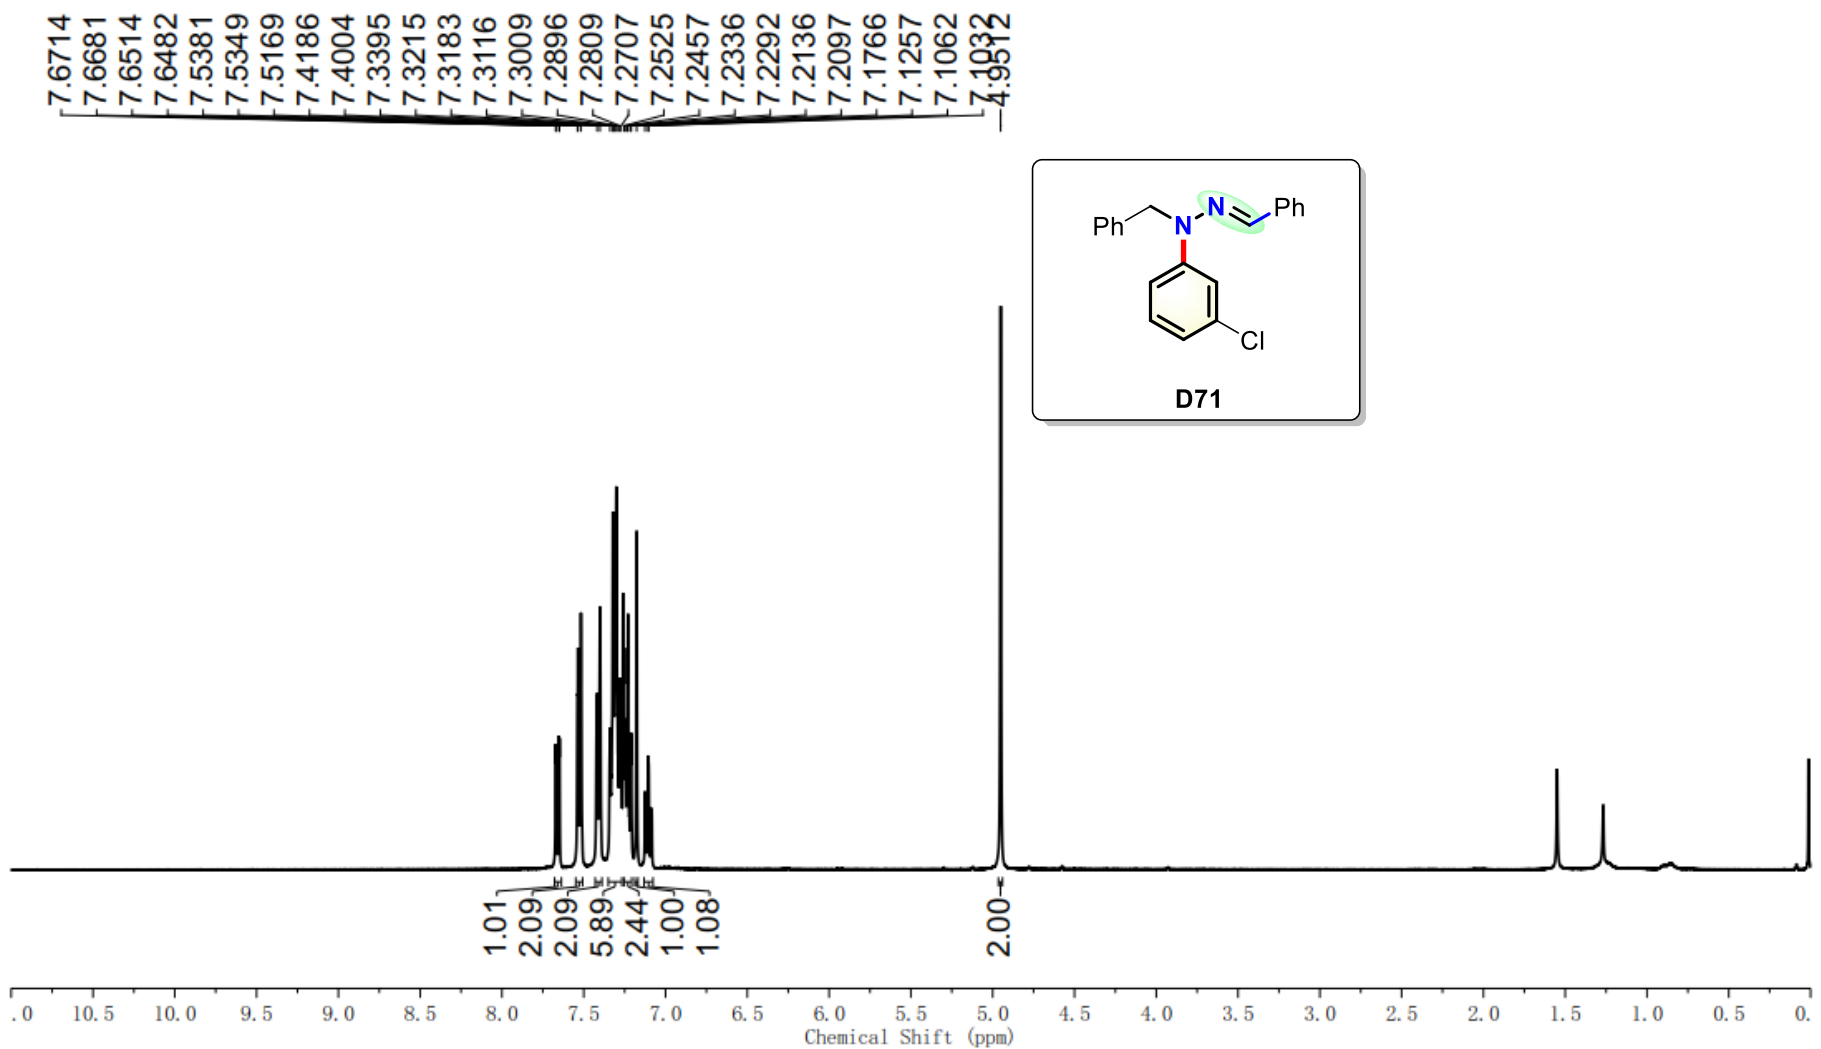

2022-11-7-yy0026-616-f10

148.91  
136.08  
135.13  
135.10  
133.81  
130.13  
129.16  
128.62  
128.33  
127.52  
126.44  
125.96  
120.52  
114.85  
112.53

50.23

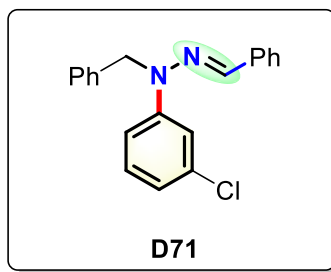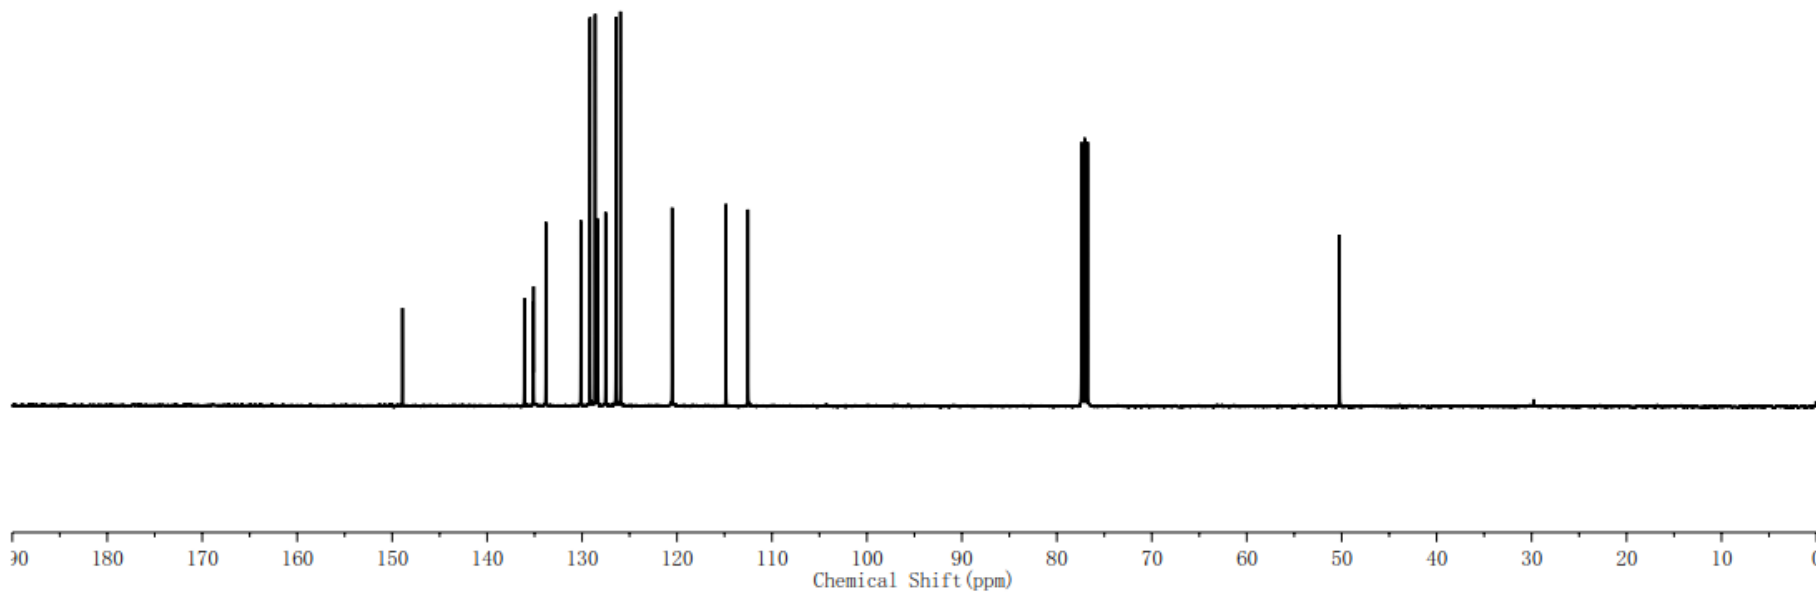

2022-10-12 yy0009 616-lqq-F14

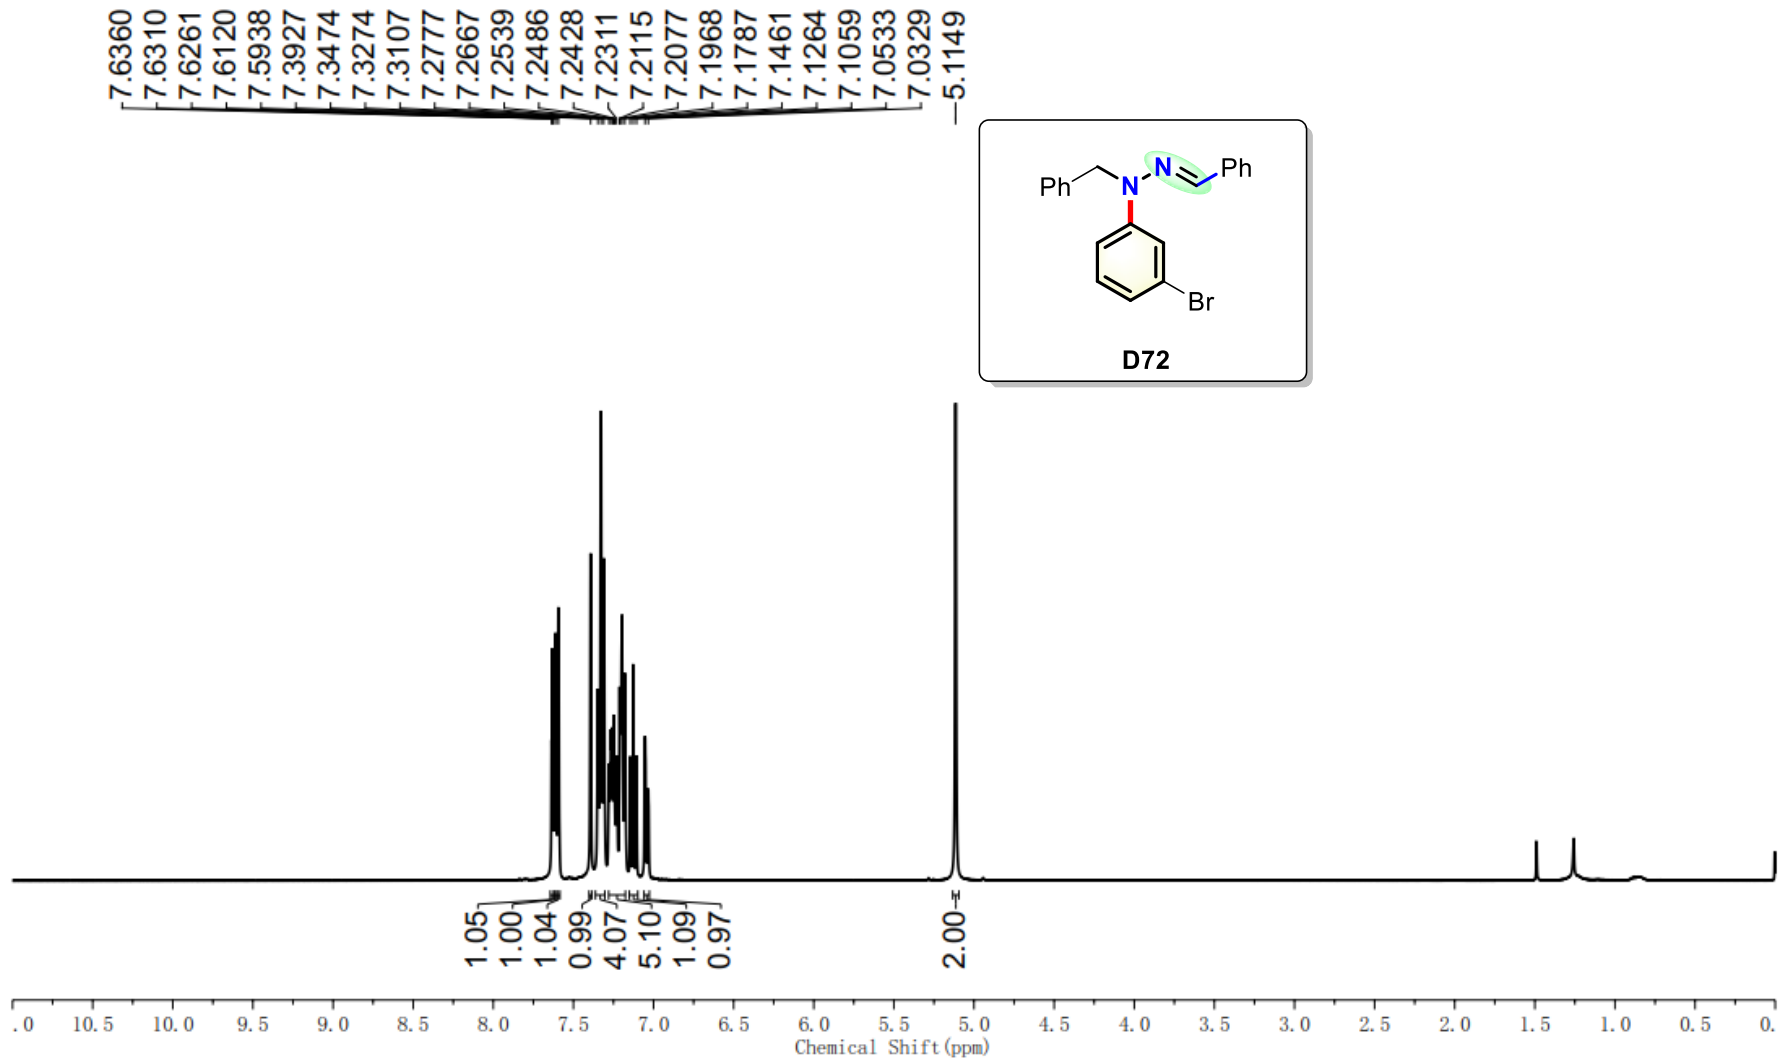



2022-11-7-yy0026-616-f14

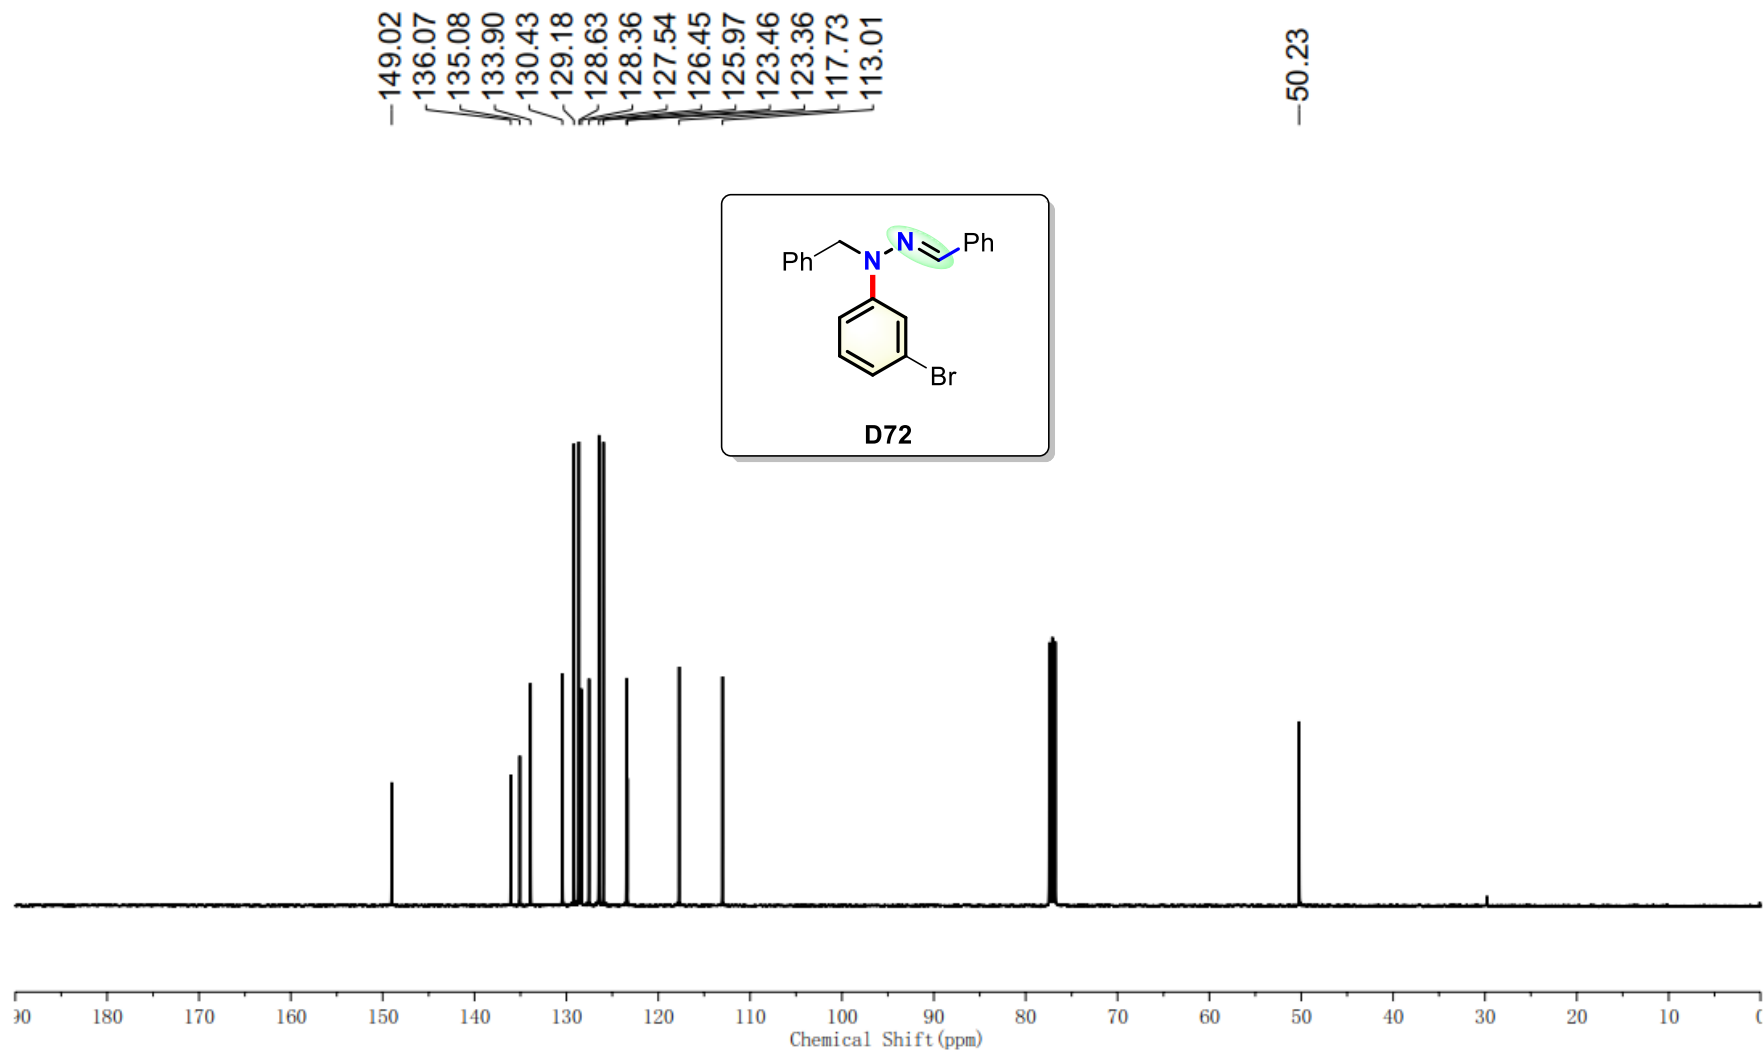

2022-11-01 yy0024 616-F17

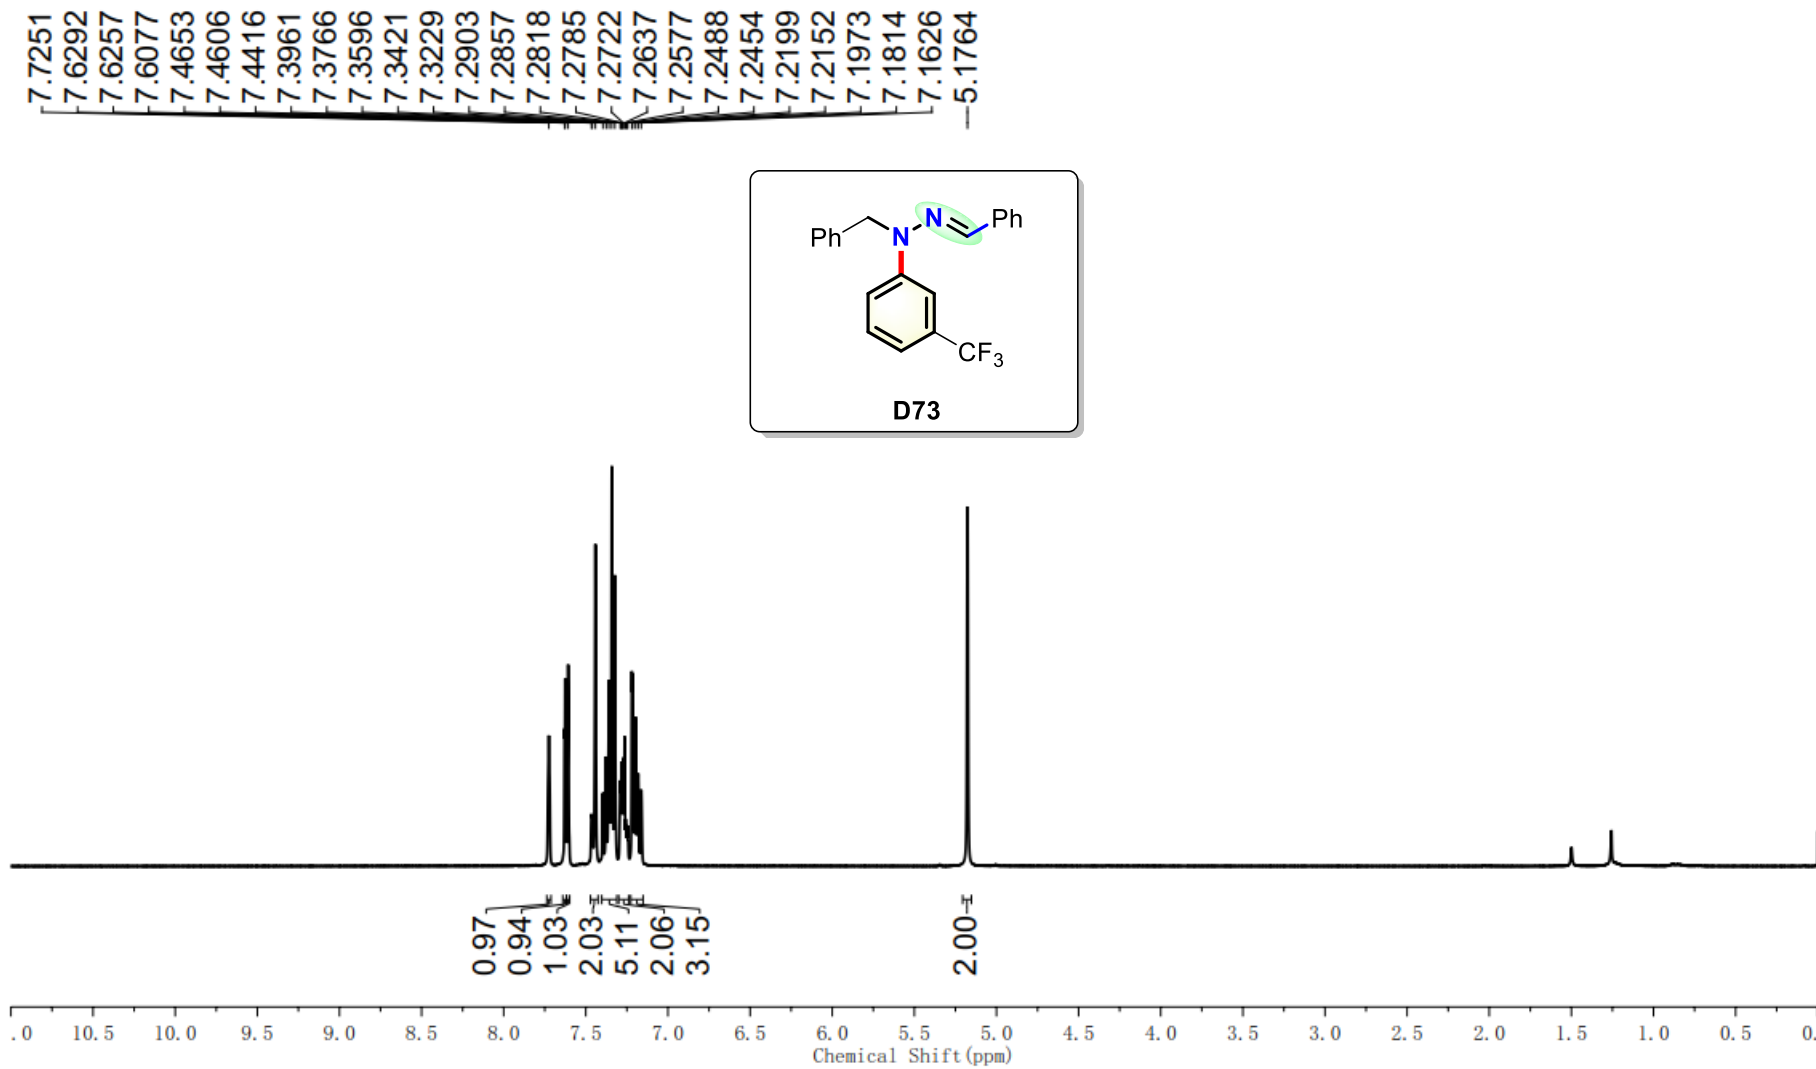

2022-11-09-yy0023-616-f17

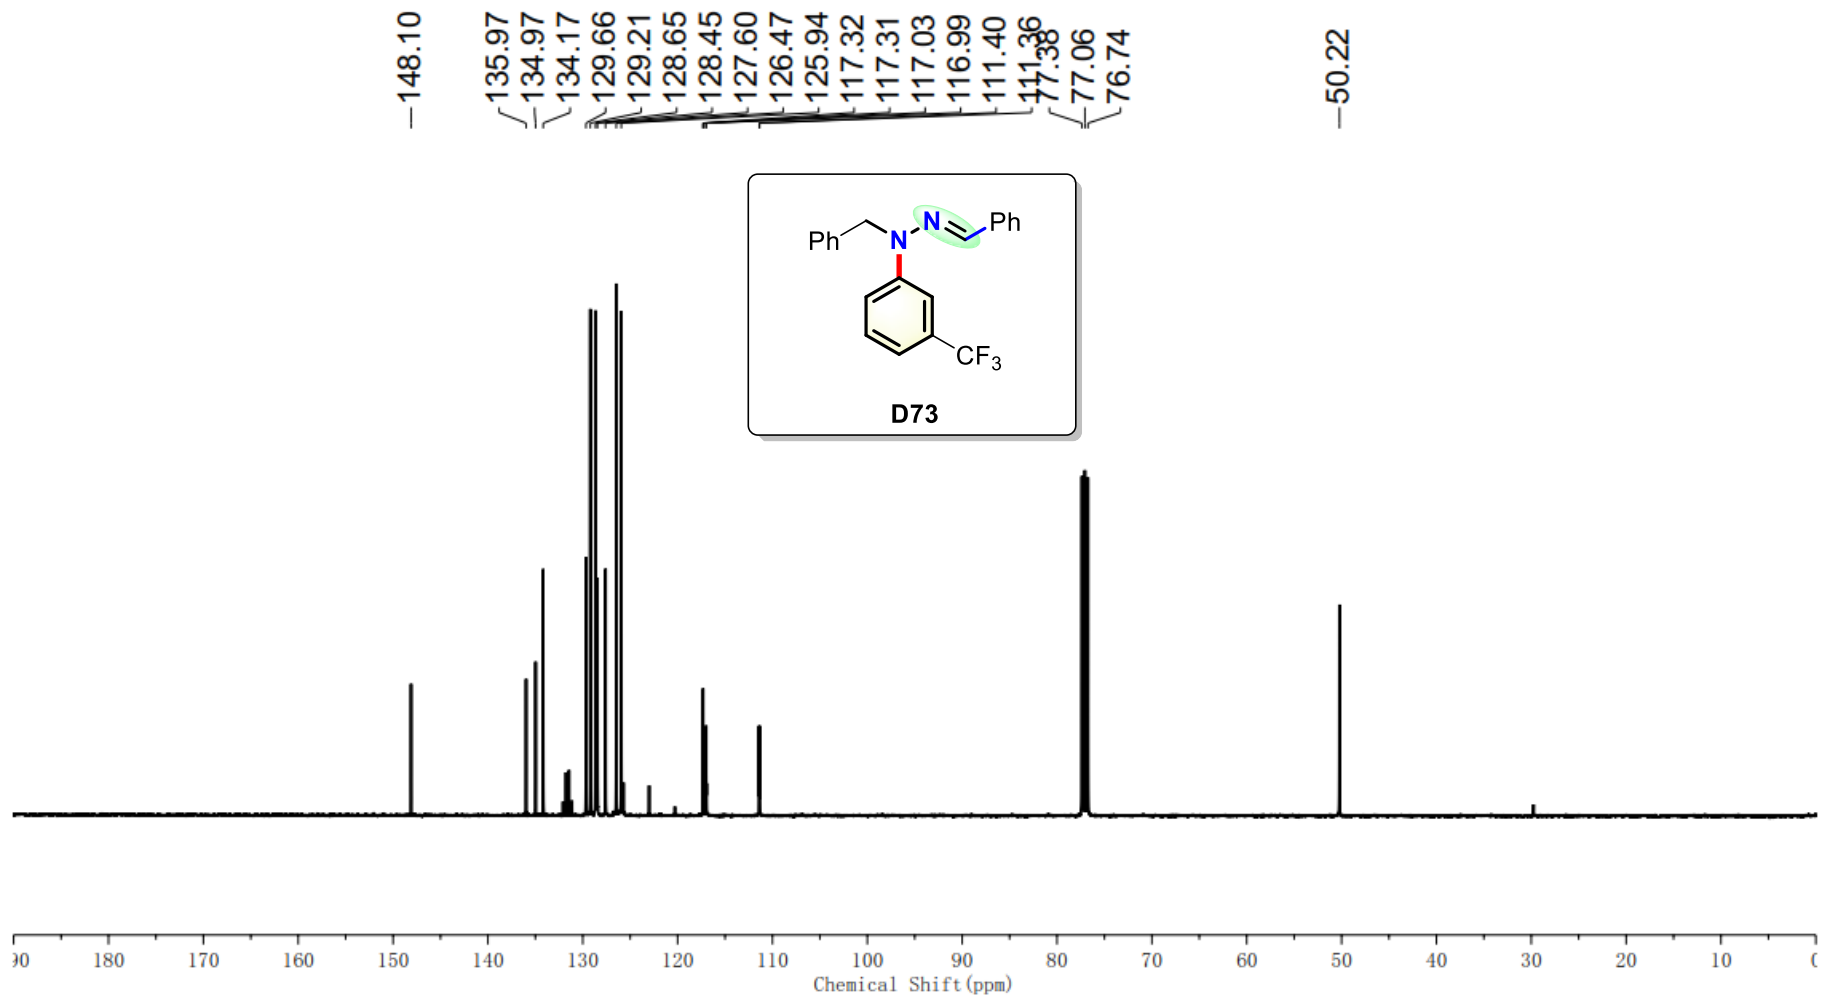

2022-11-14 yy0044 616-lqq-4

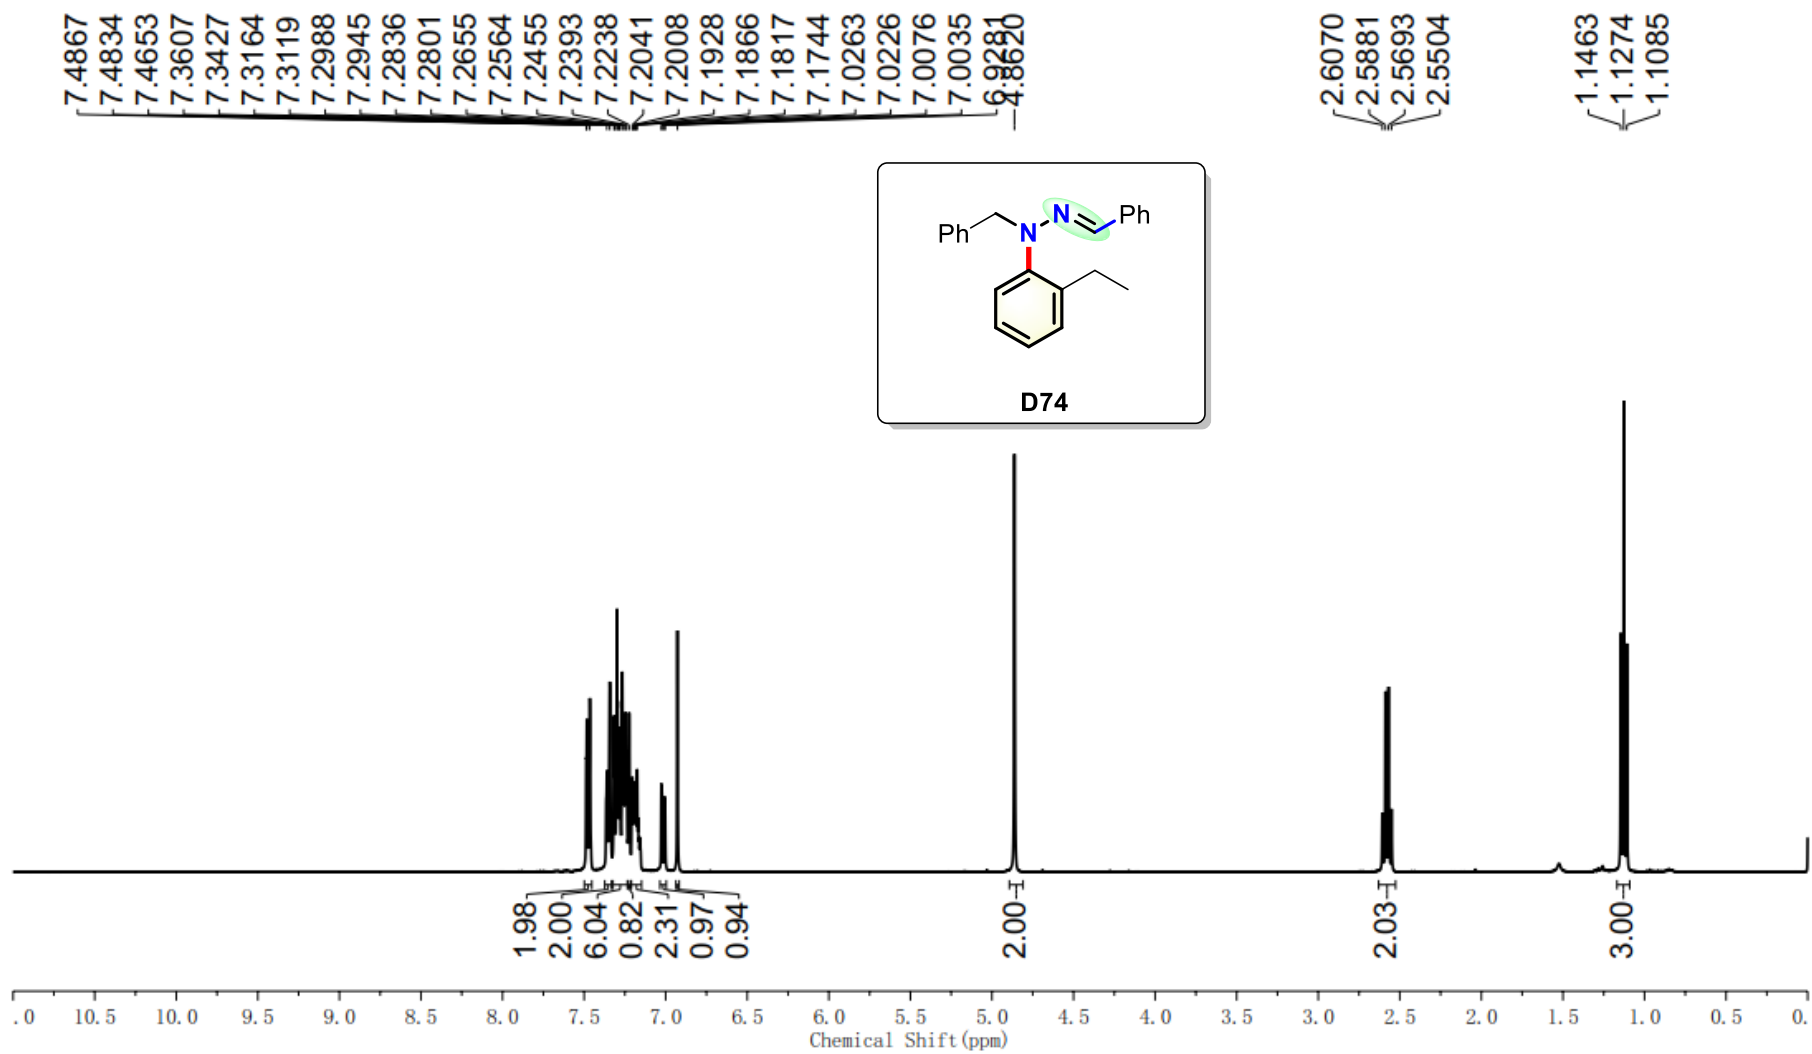

2022-11-17 yy001 616 lqq-4

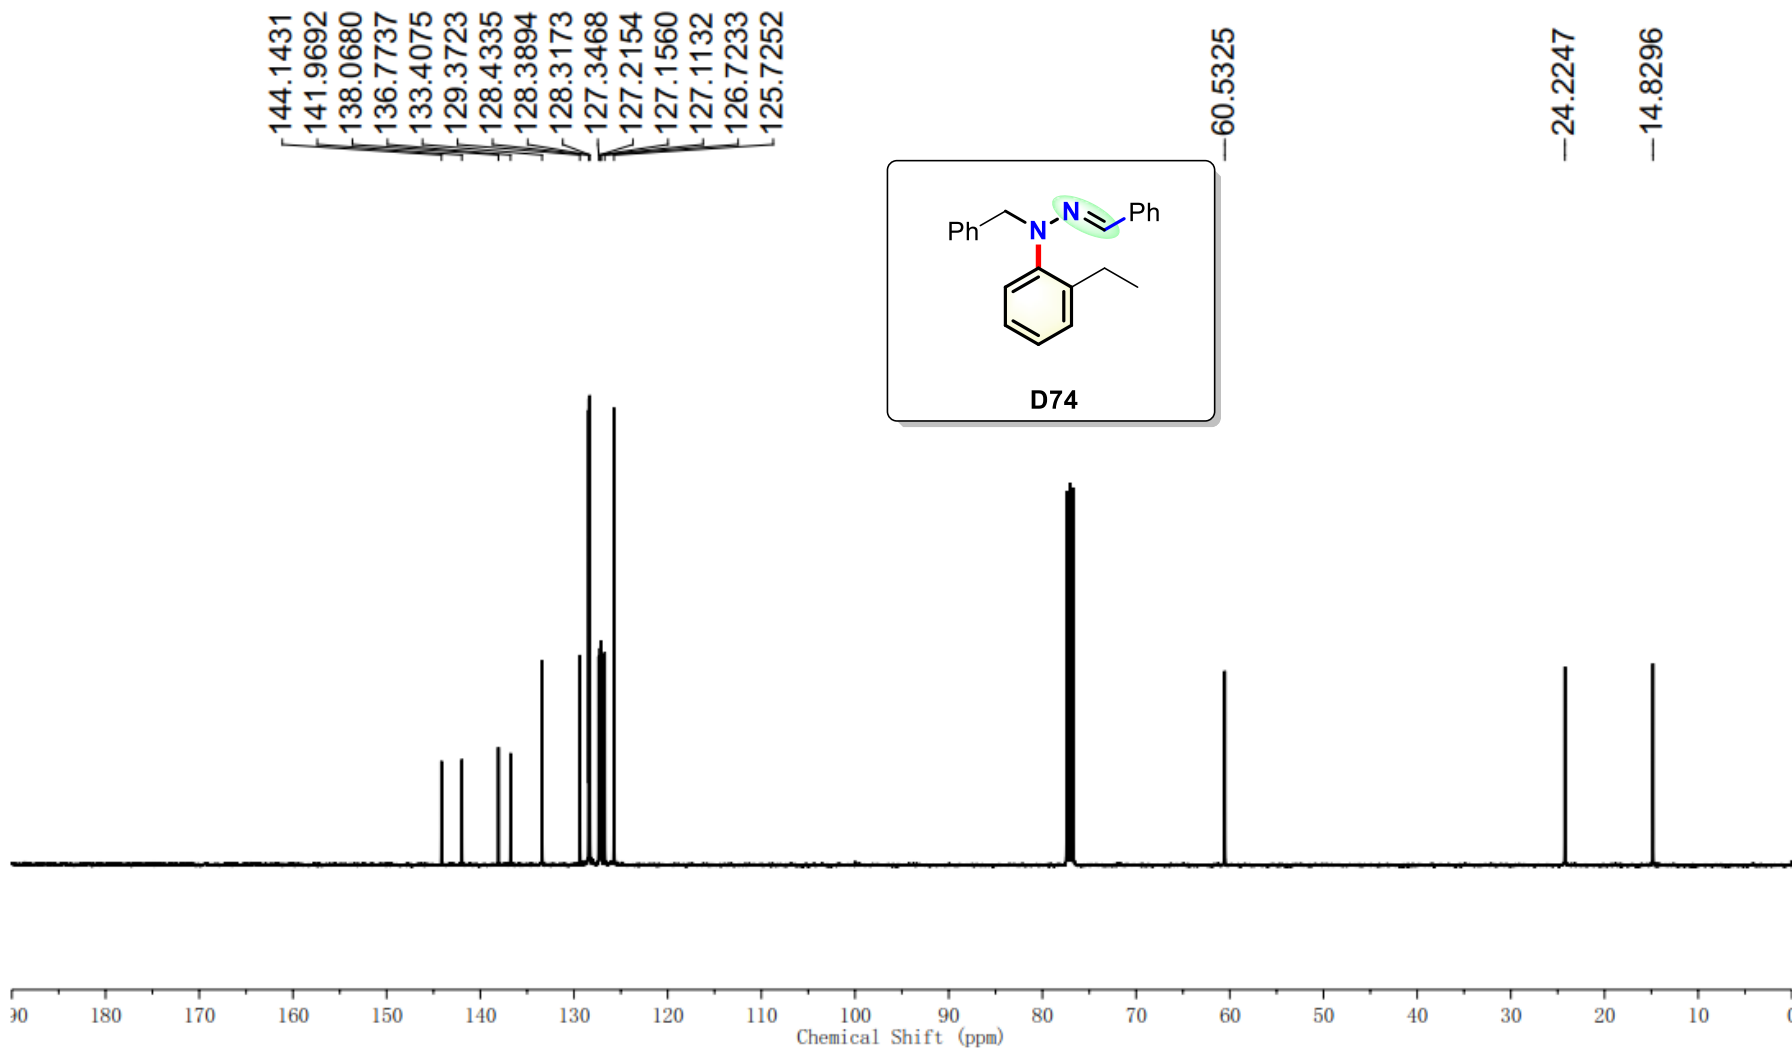

2022-11-18 yy0009 616-lqq-7

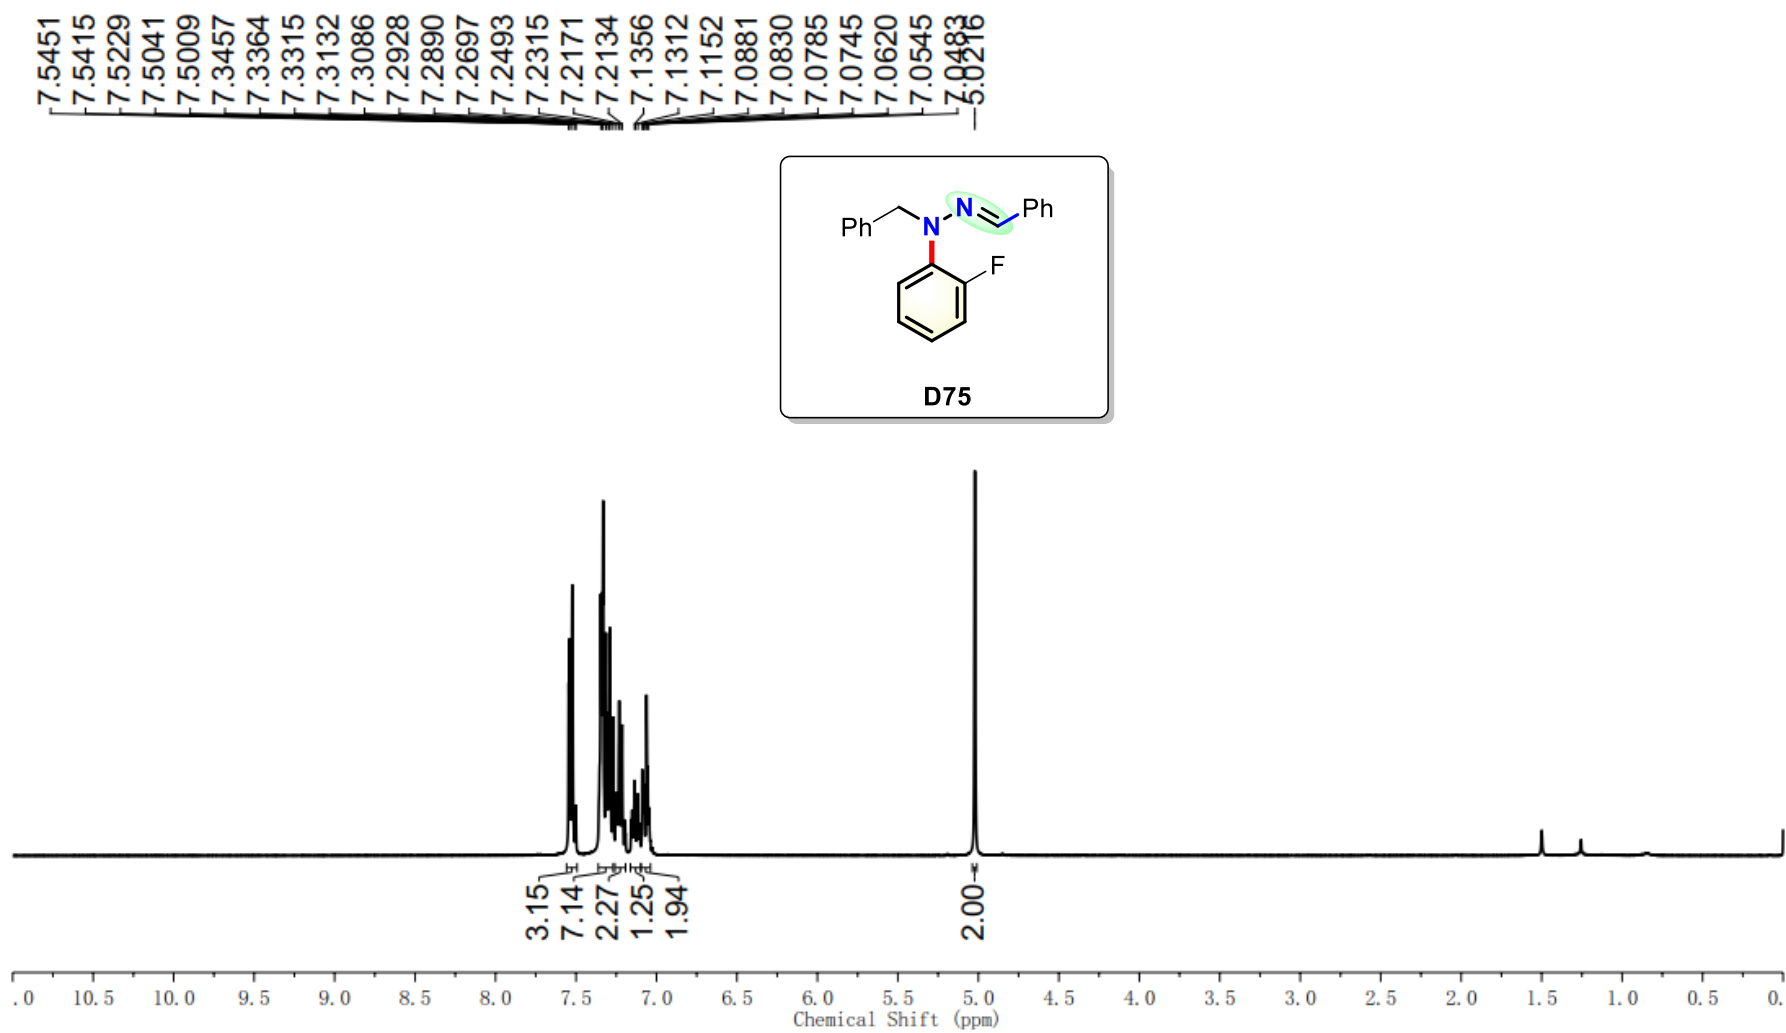

2022-11-23-yy0024-616-lqq-f7

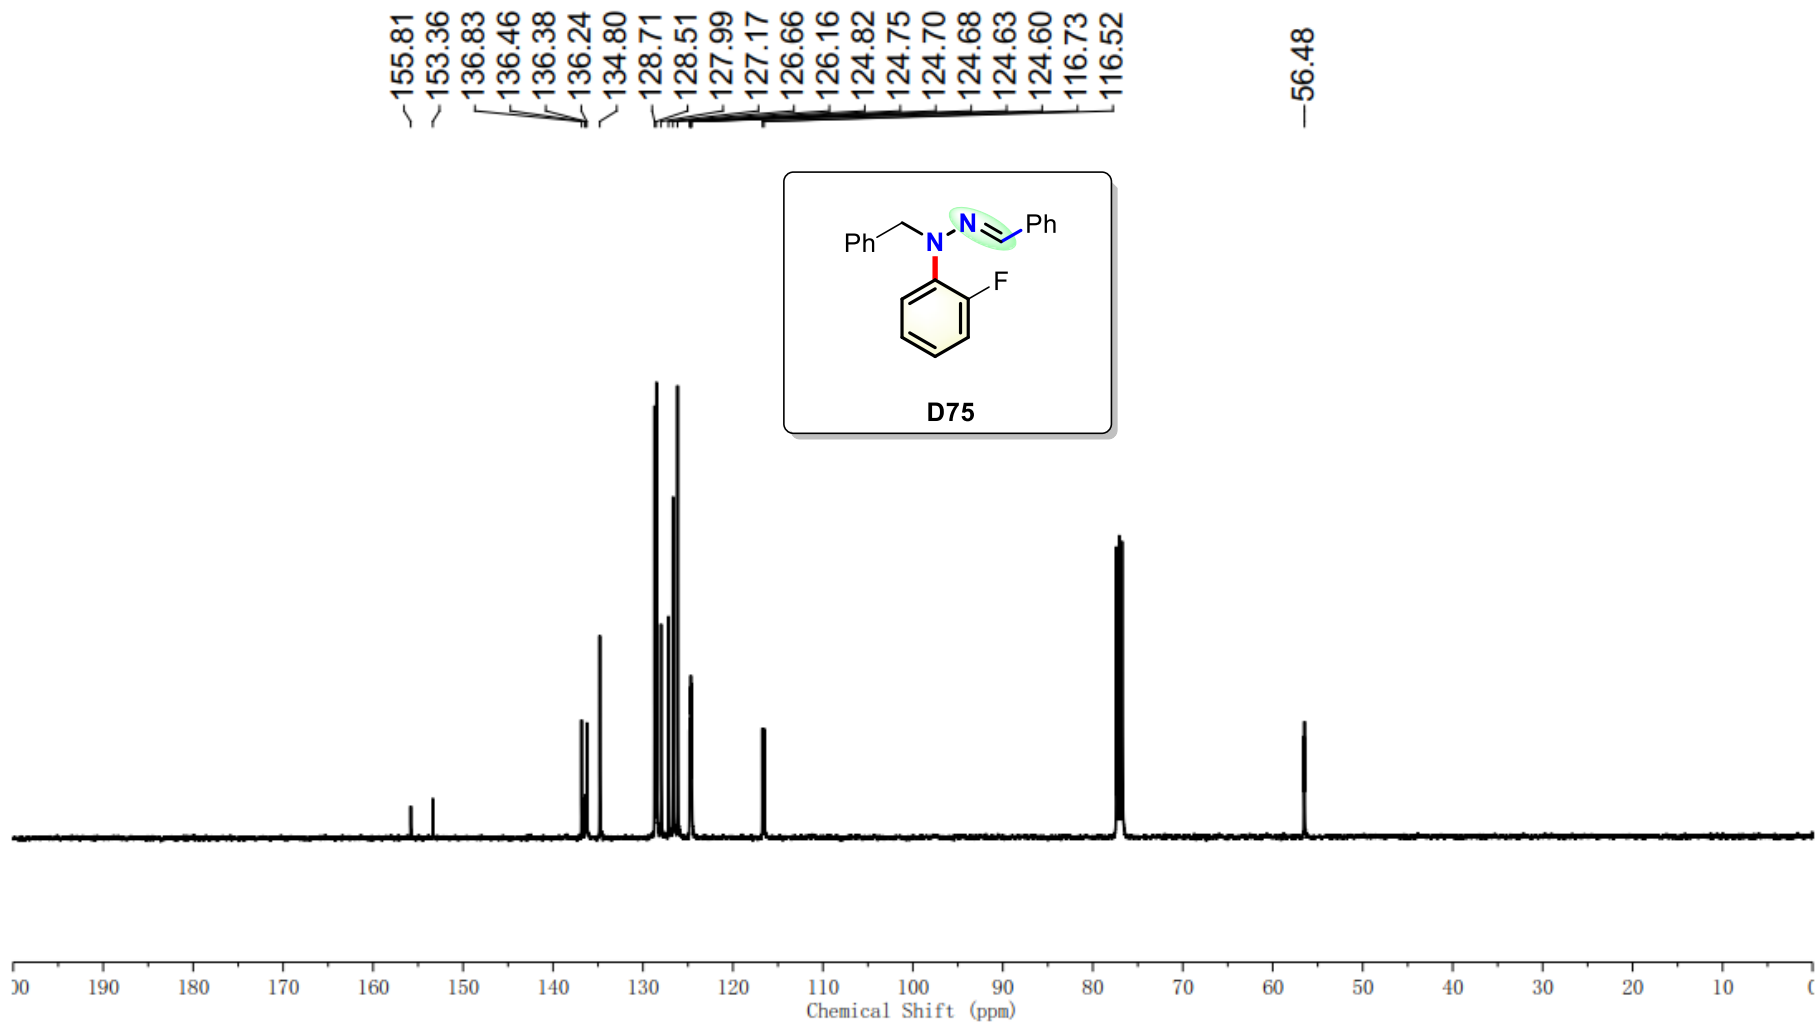

2022-11-14 yy0044 616-1qq-11

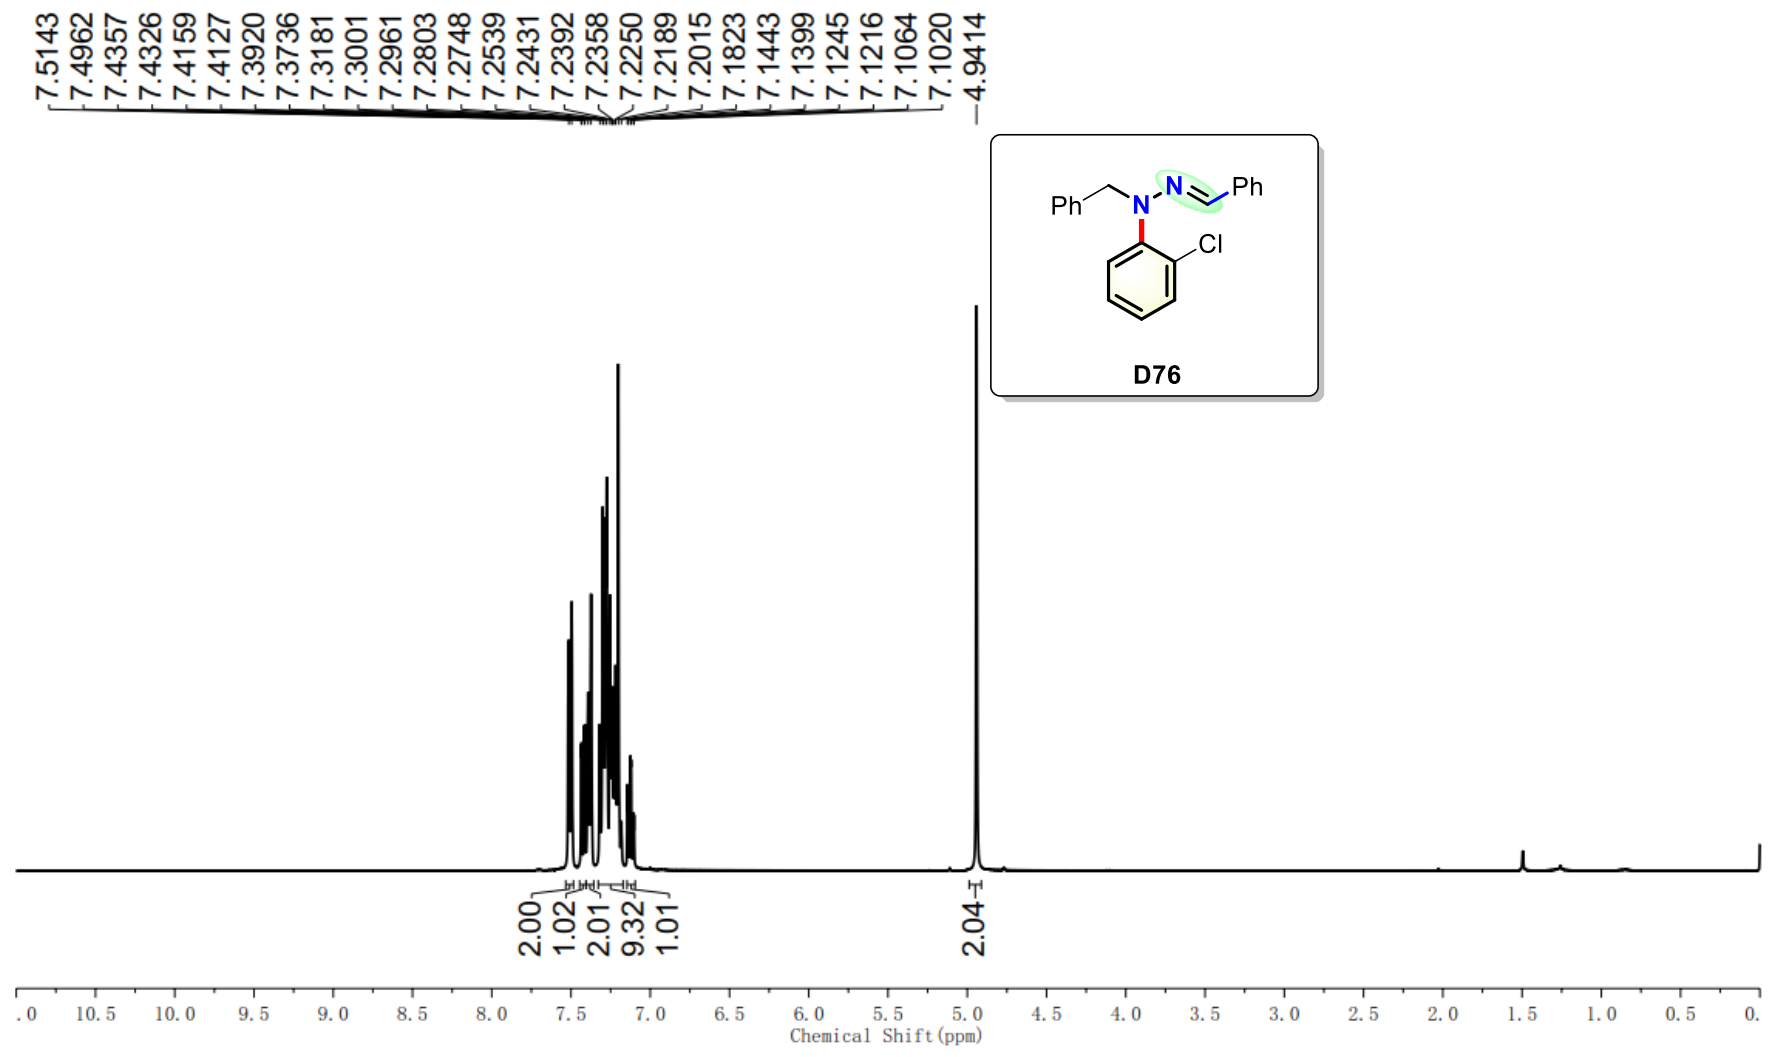



2022-11-17 yy001 616 lqq-11

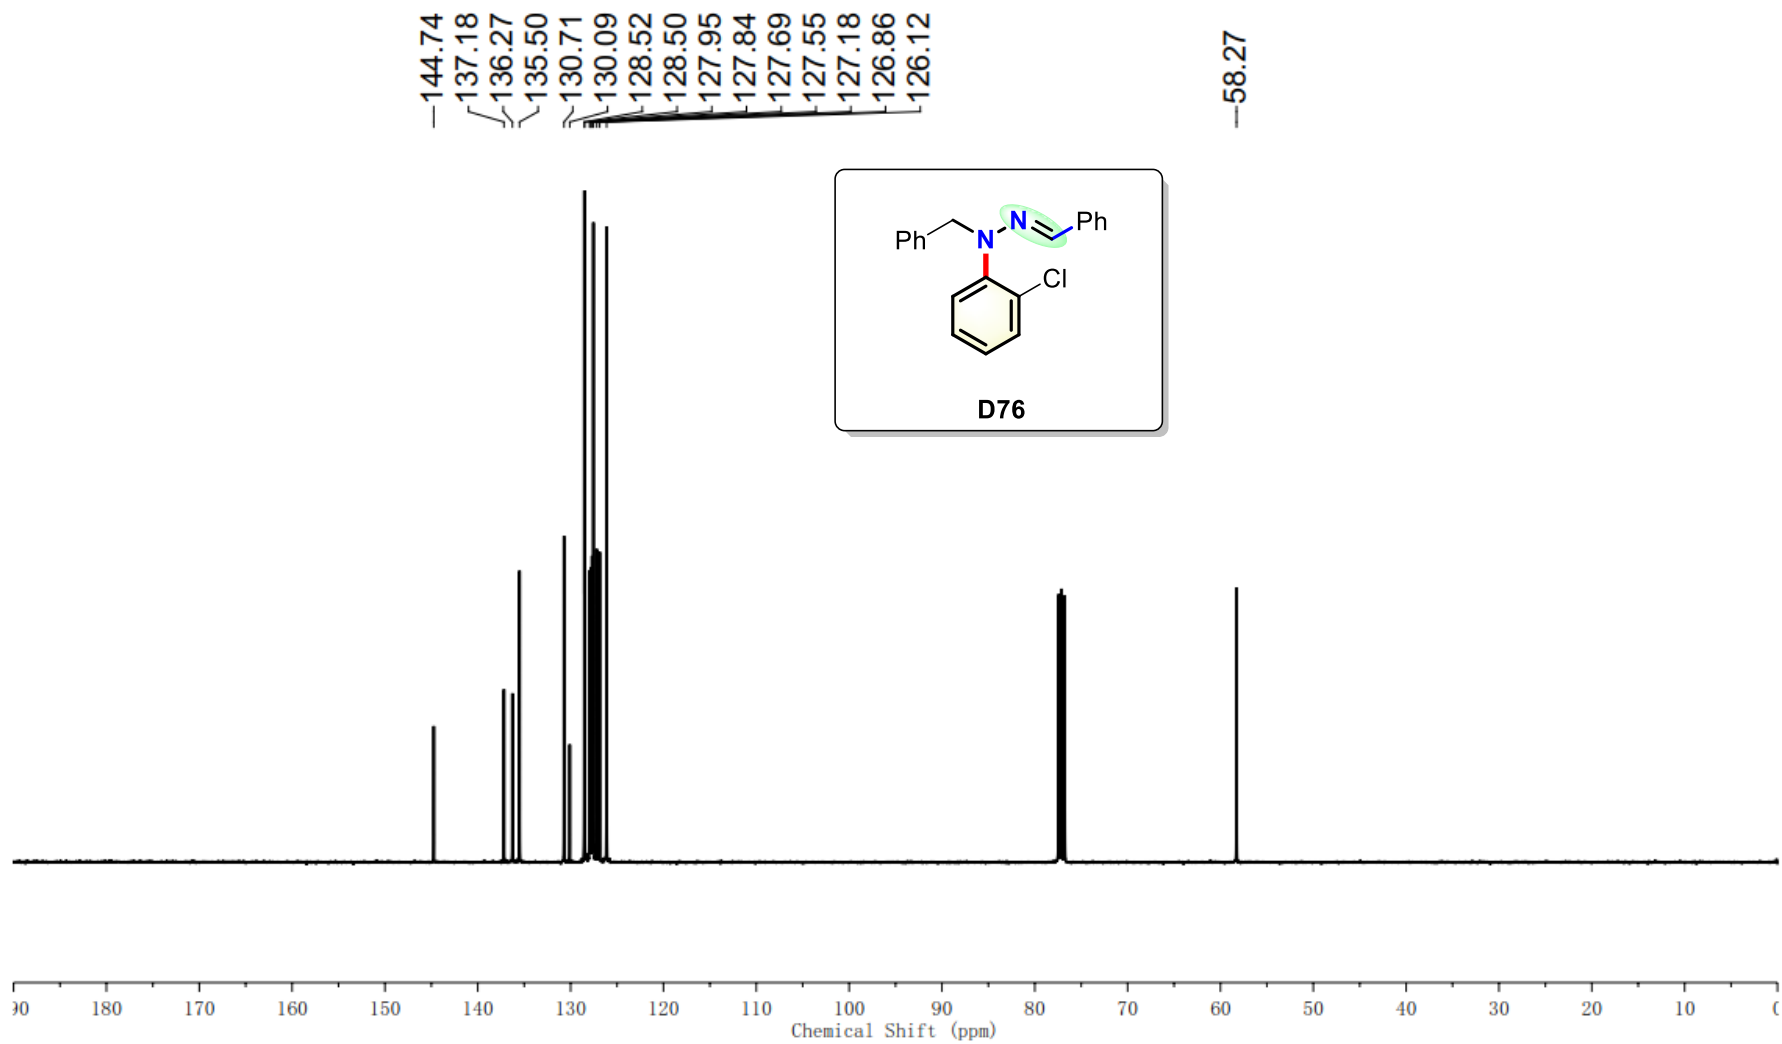

2022-10-27 yy0018 616-lq15

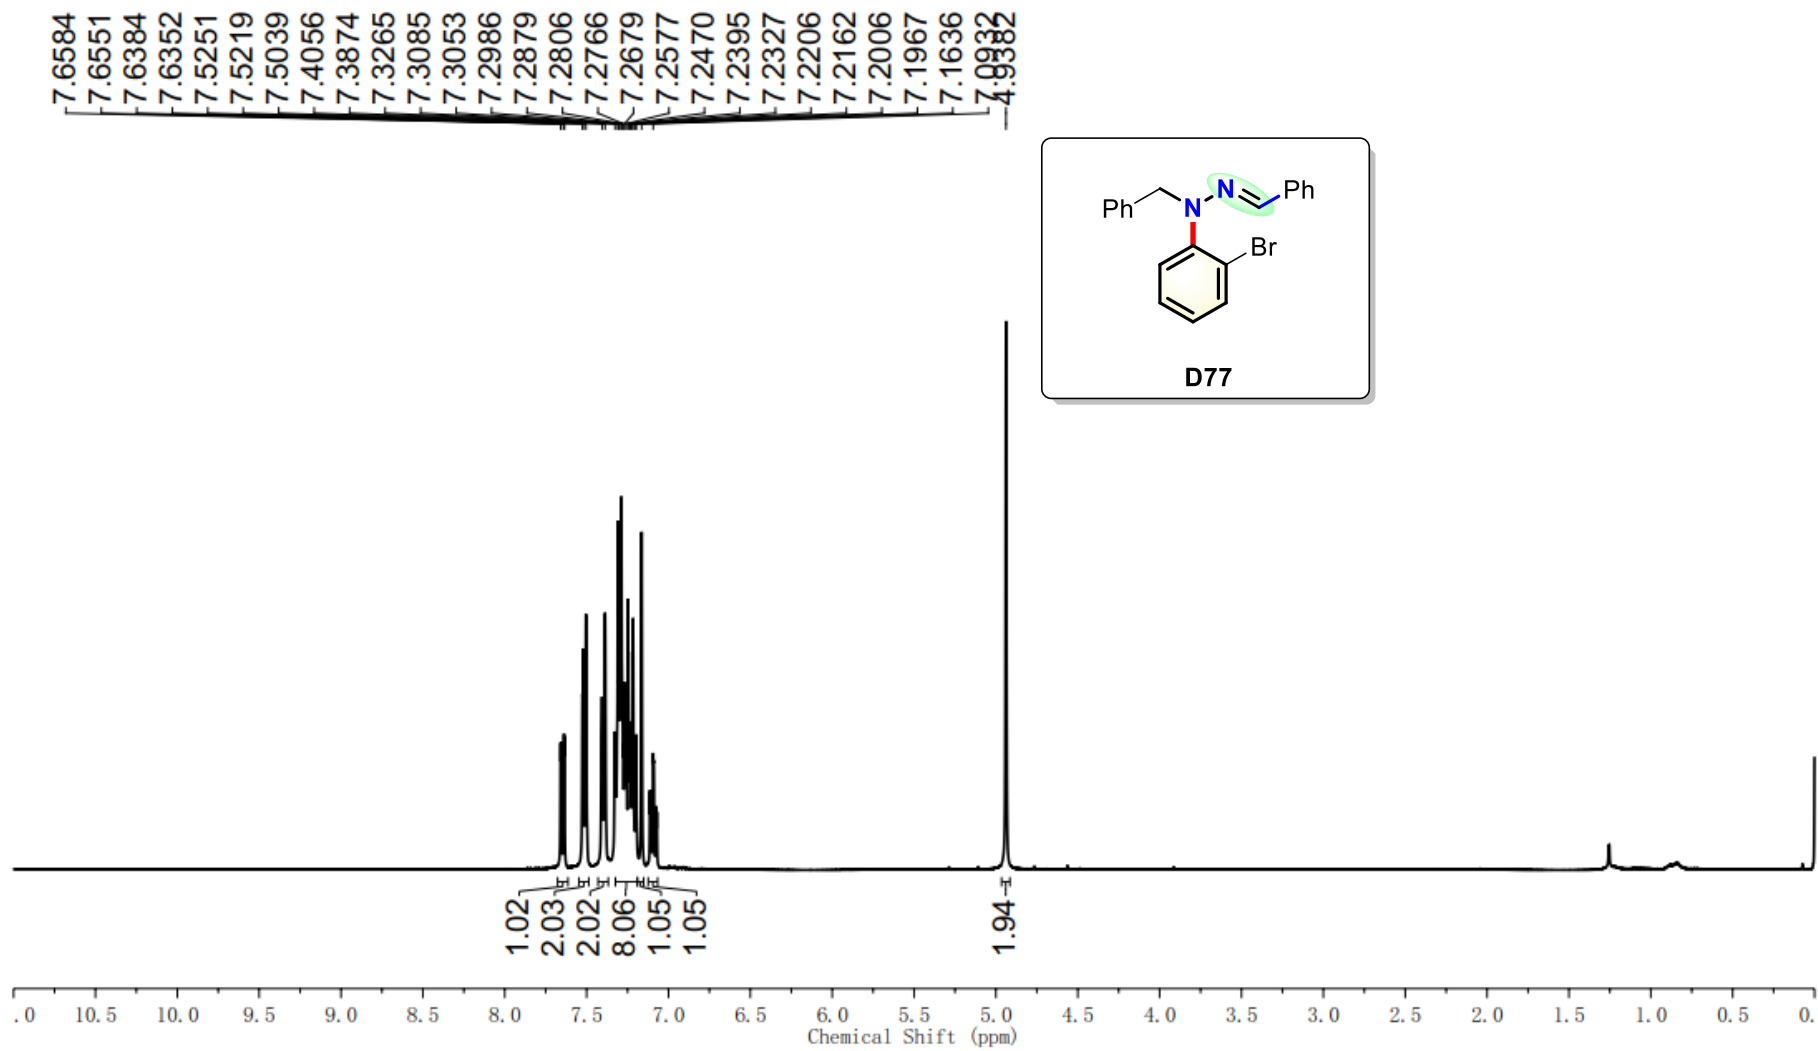

2022-11-09-yy0023-616-f15

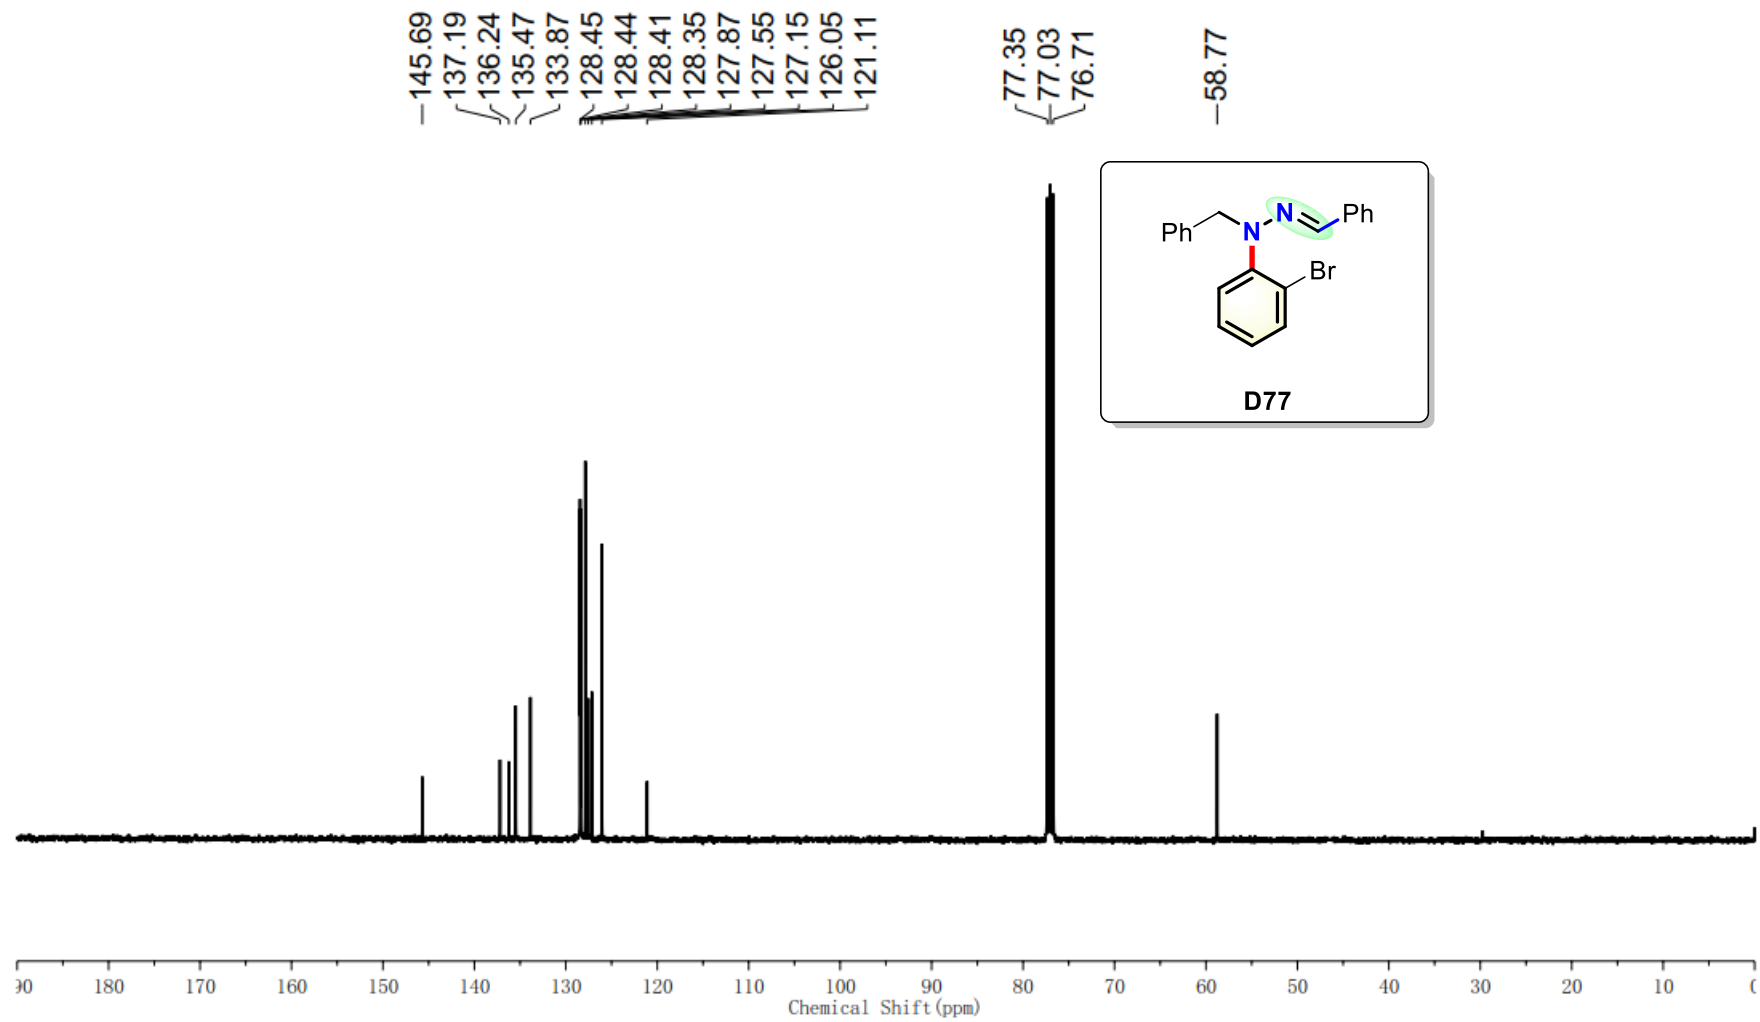

2022-12-6 yy0032 616-1qq-12

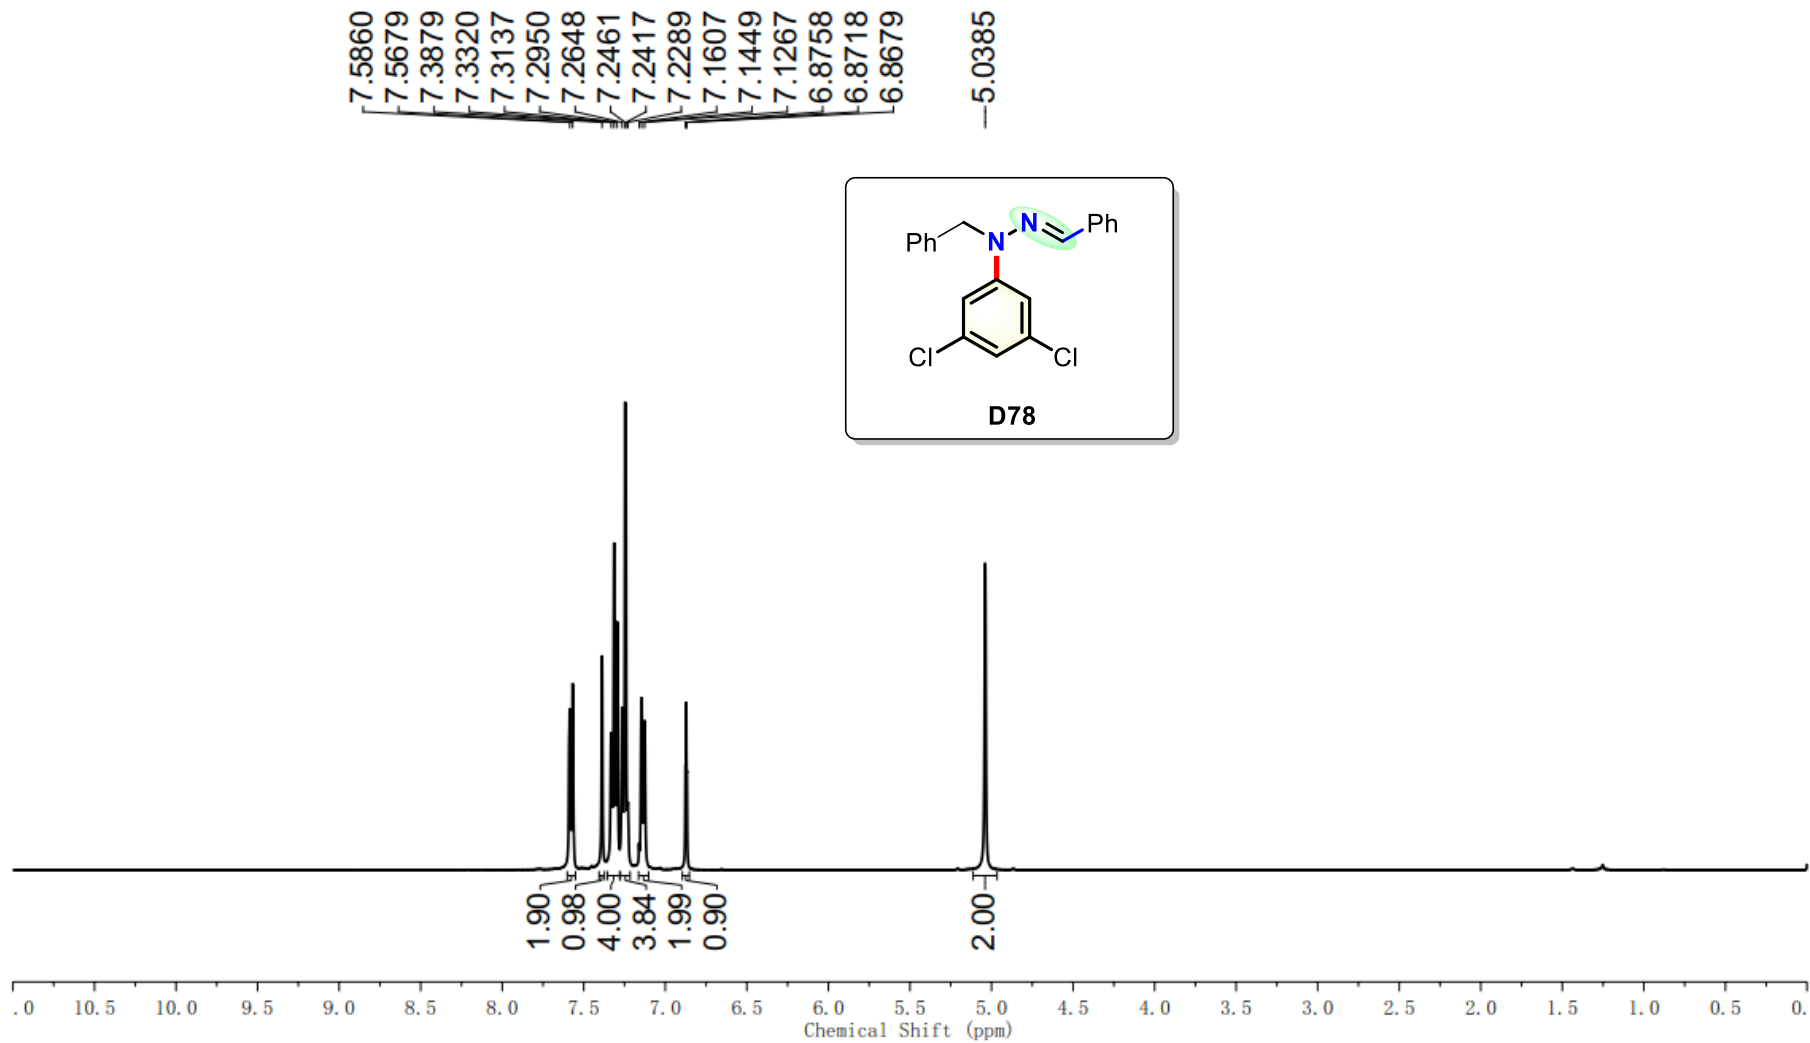

2022-12-7 yy0034 616 lqq-12

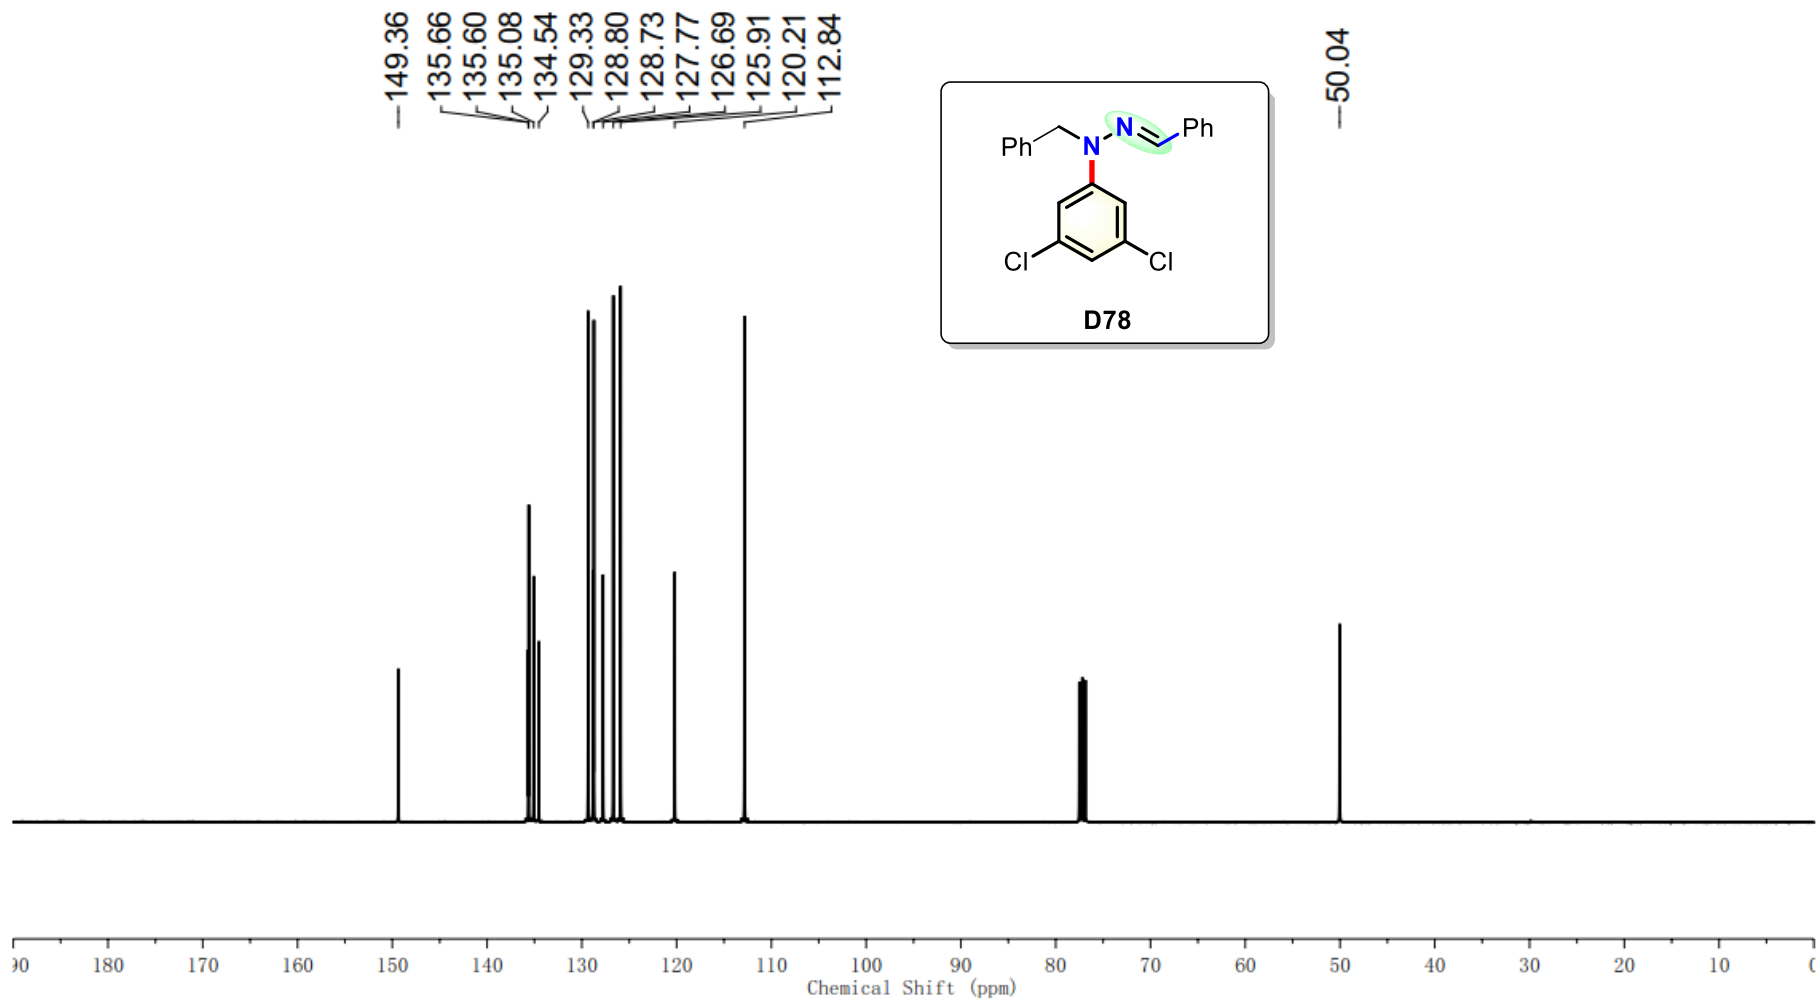

2022-11-7-yy0025-616-f18

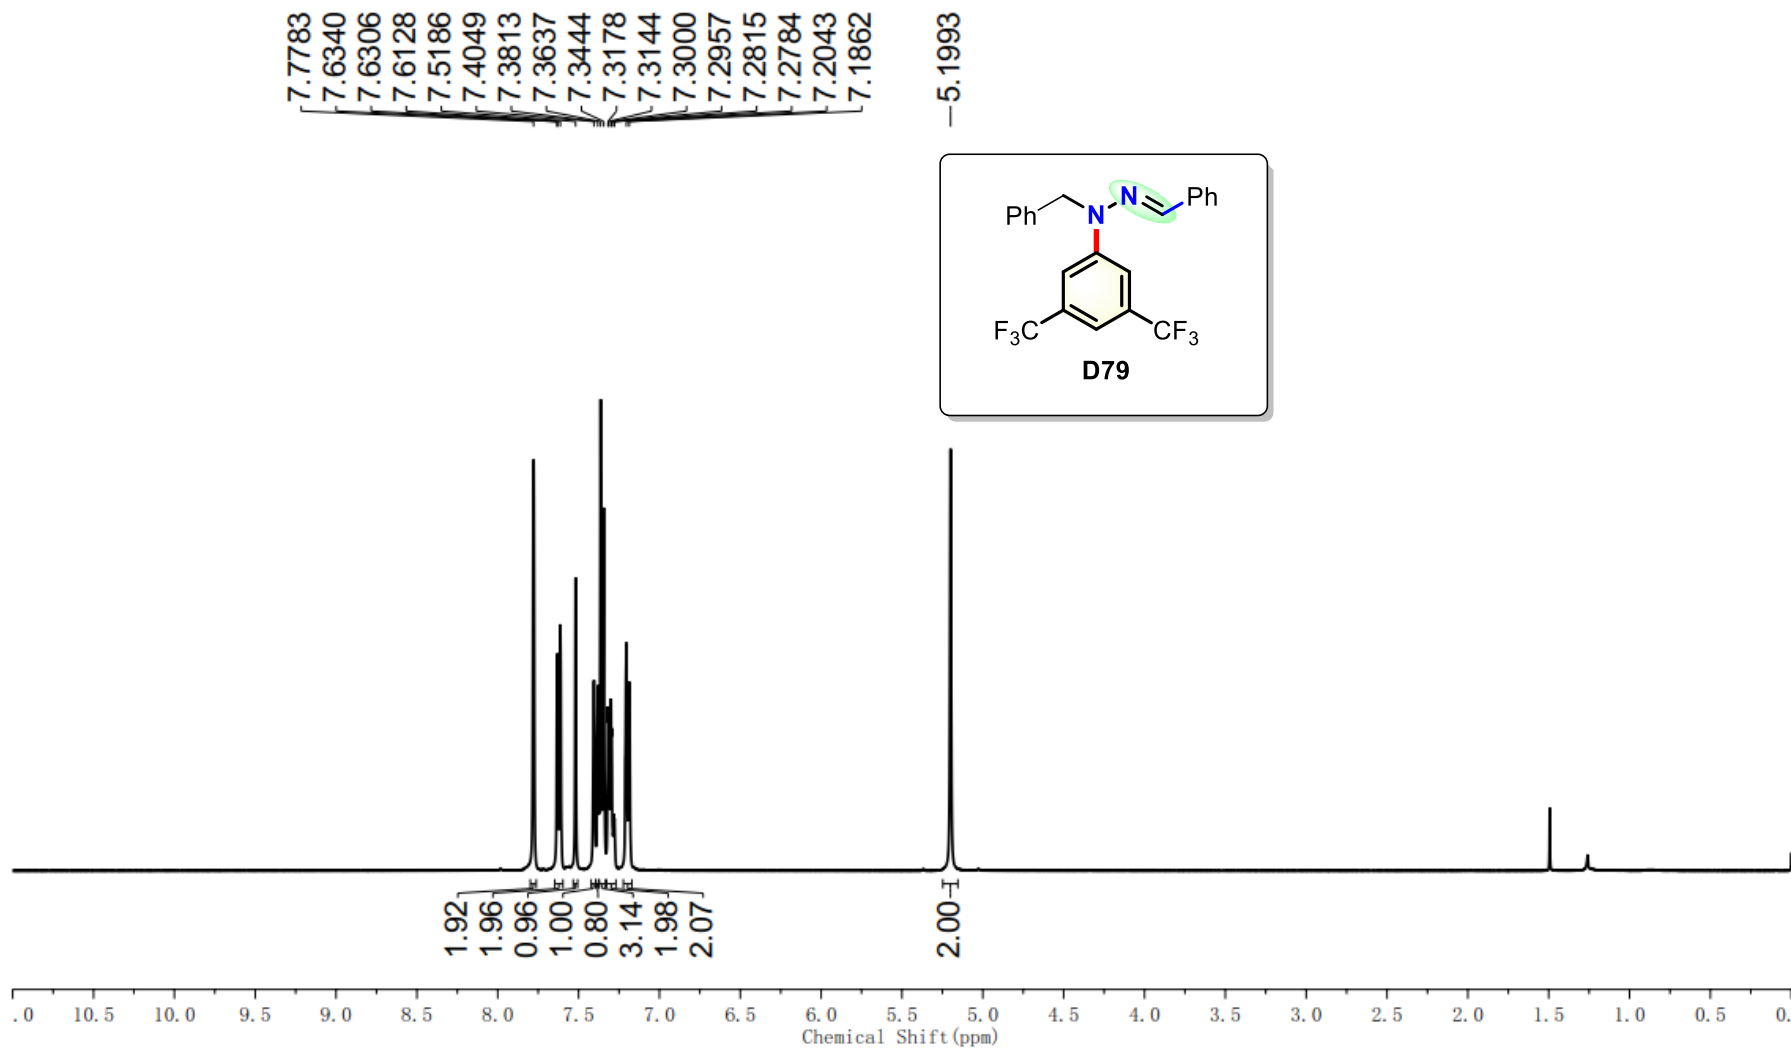

2022-11-09-yy0023-616-f18

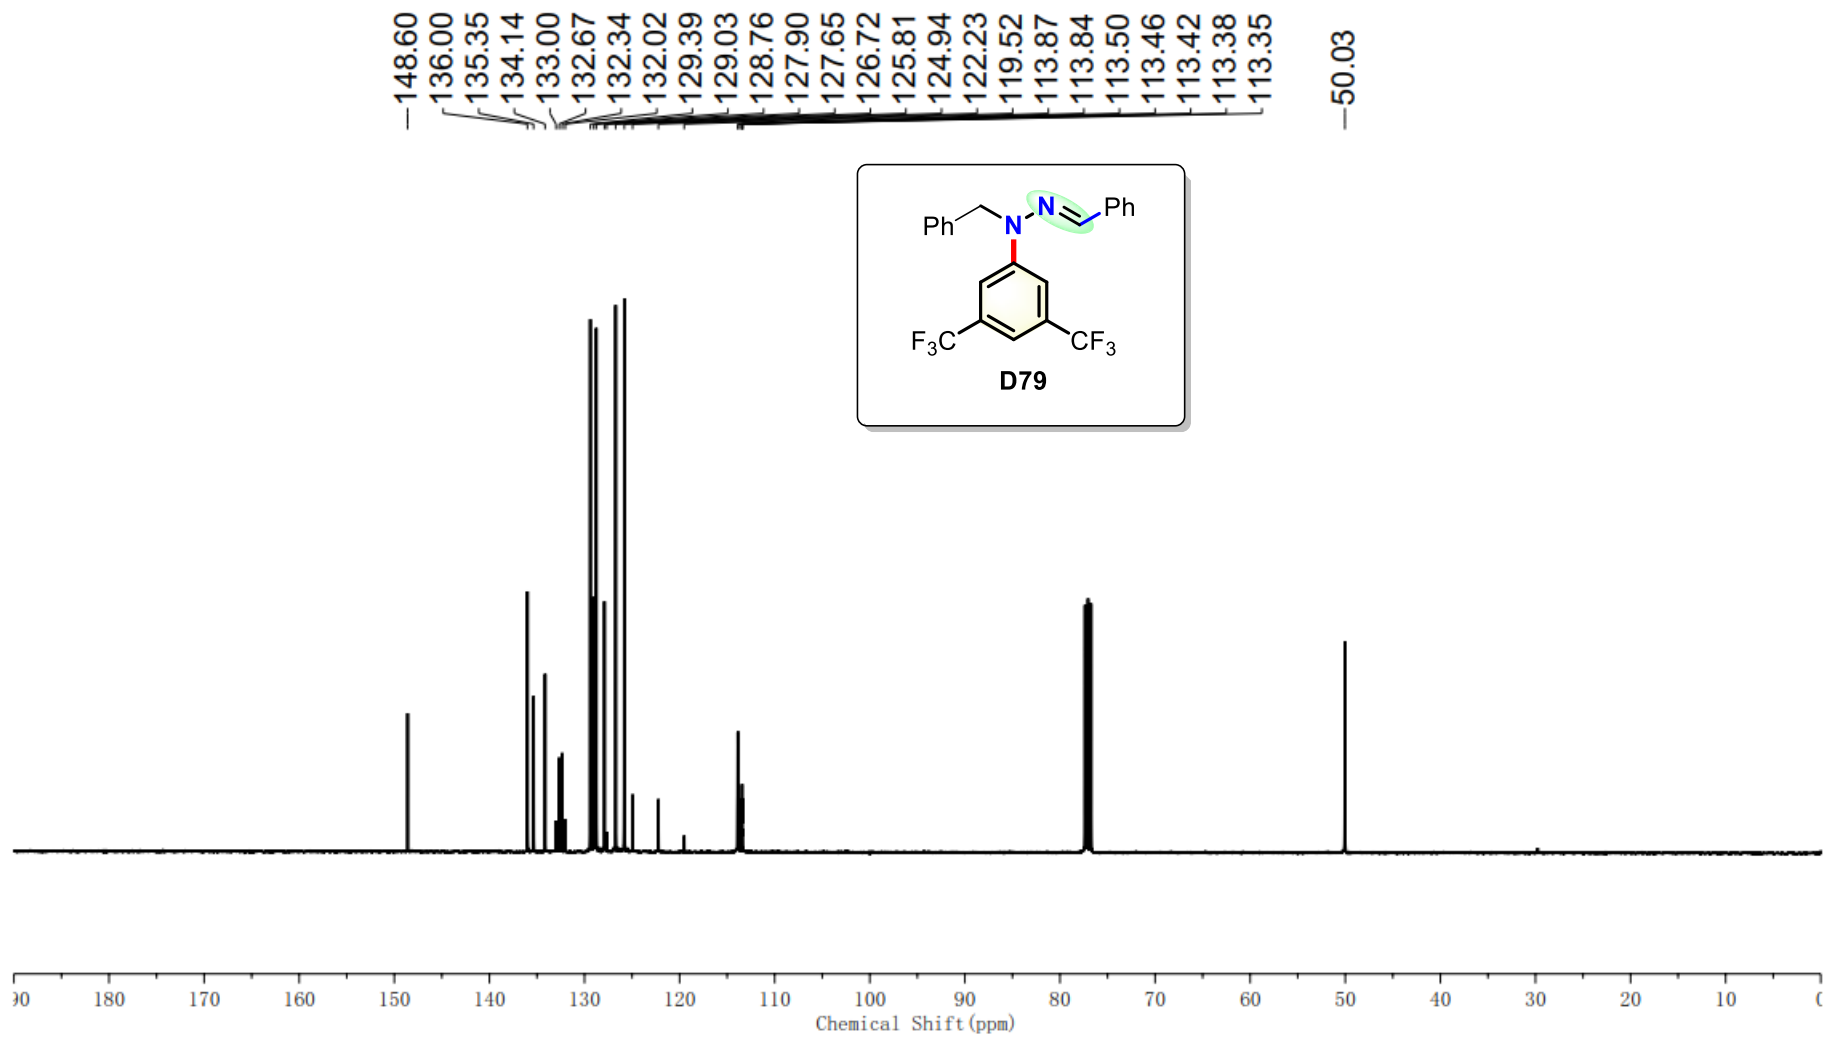

S303

2022-12-7 yy0035 616-1qq-18

62.8818

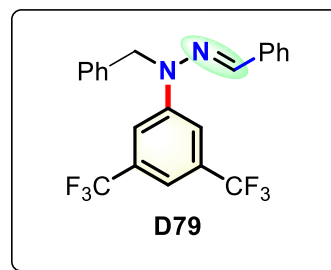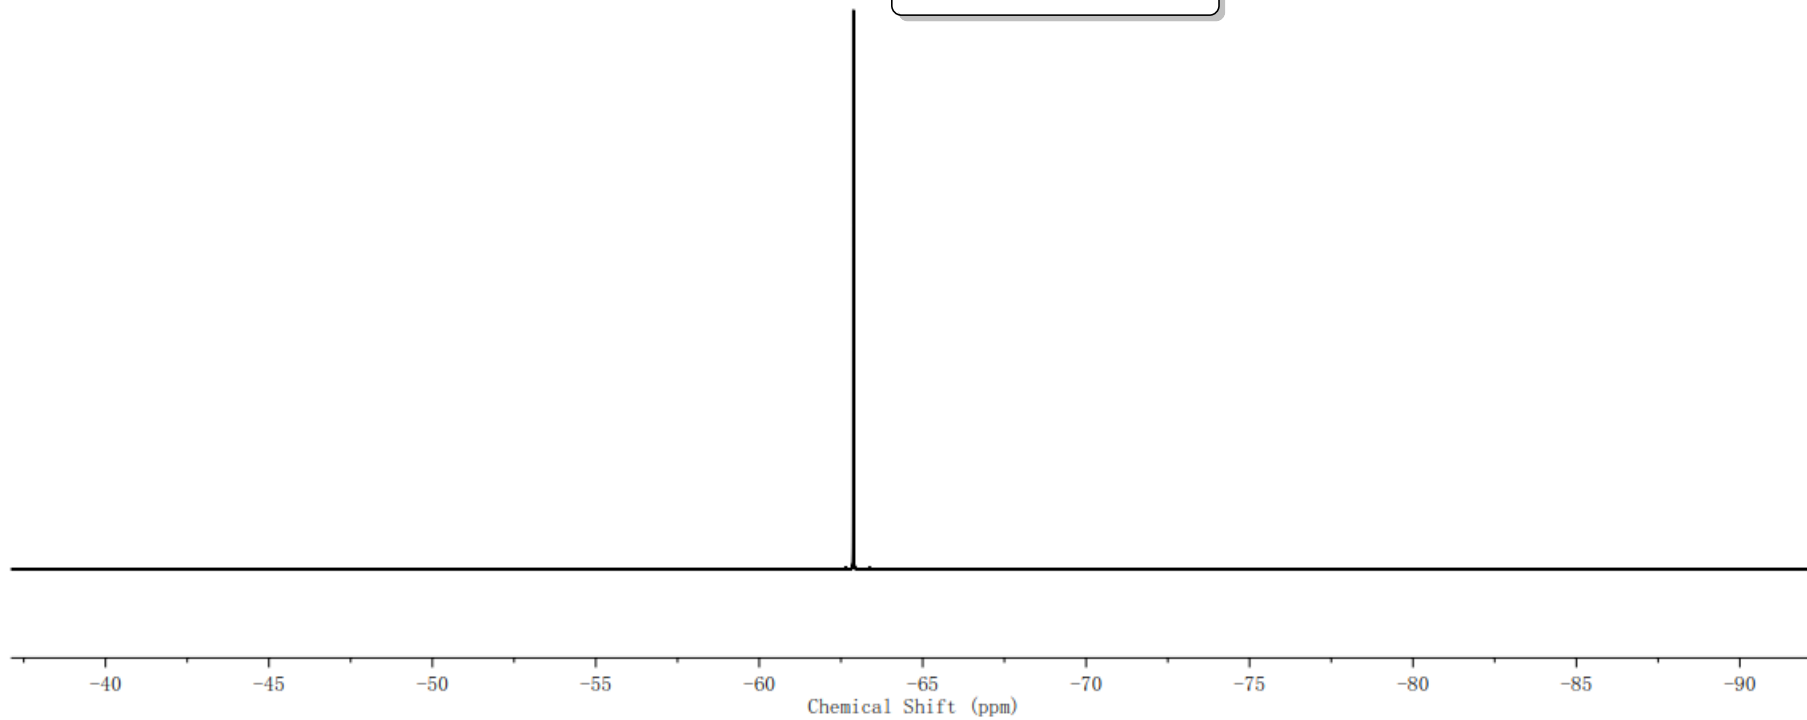

S304



2022-11-18 yy0009 616-lqq-22

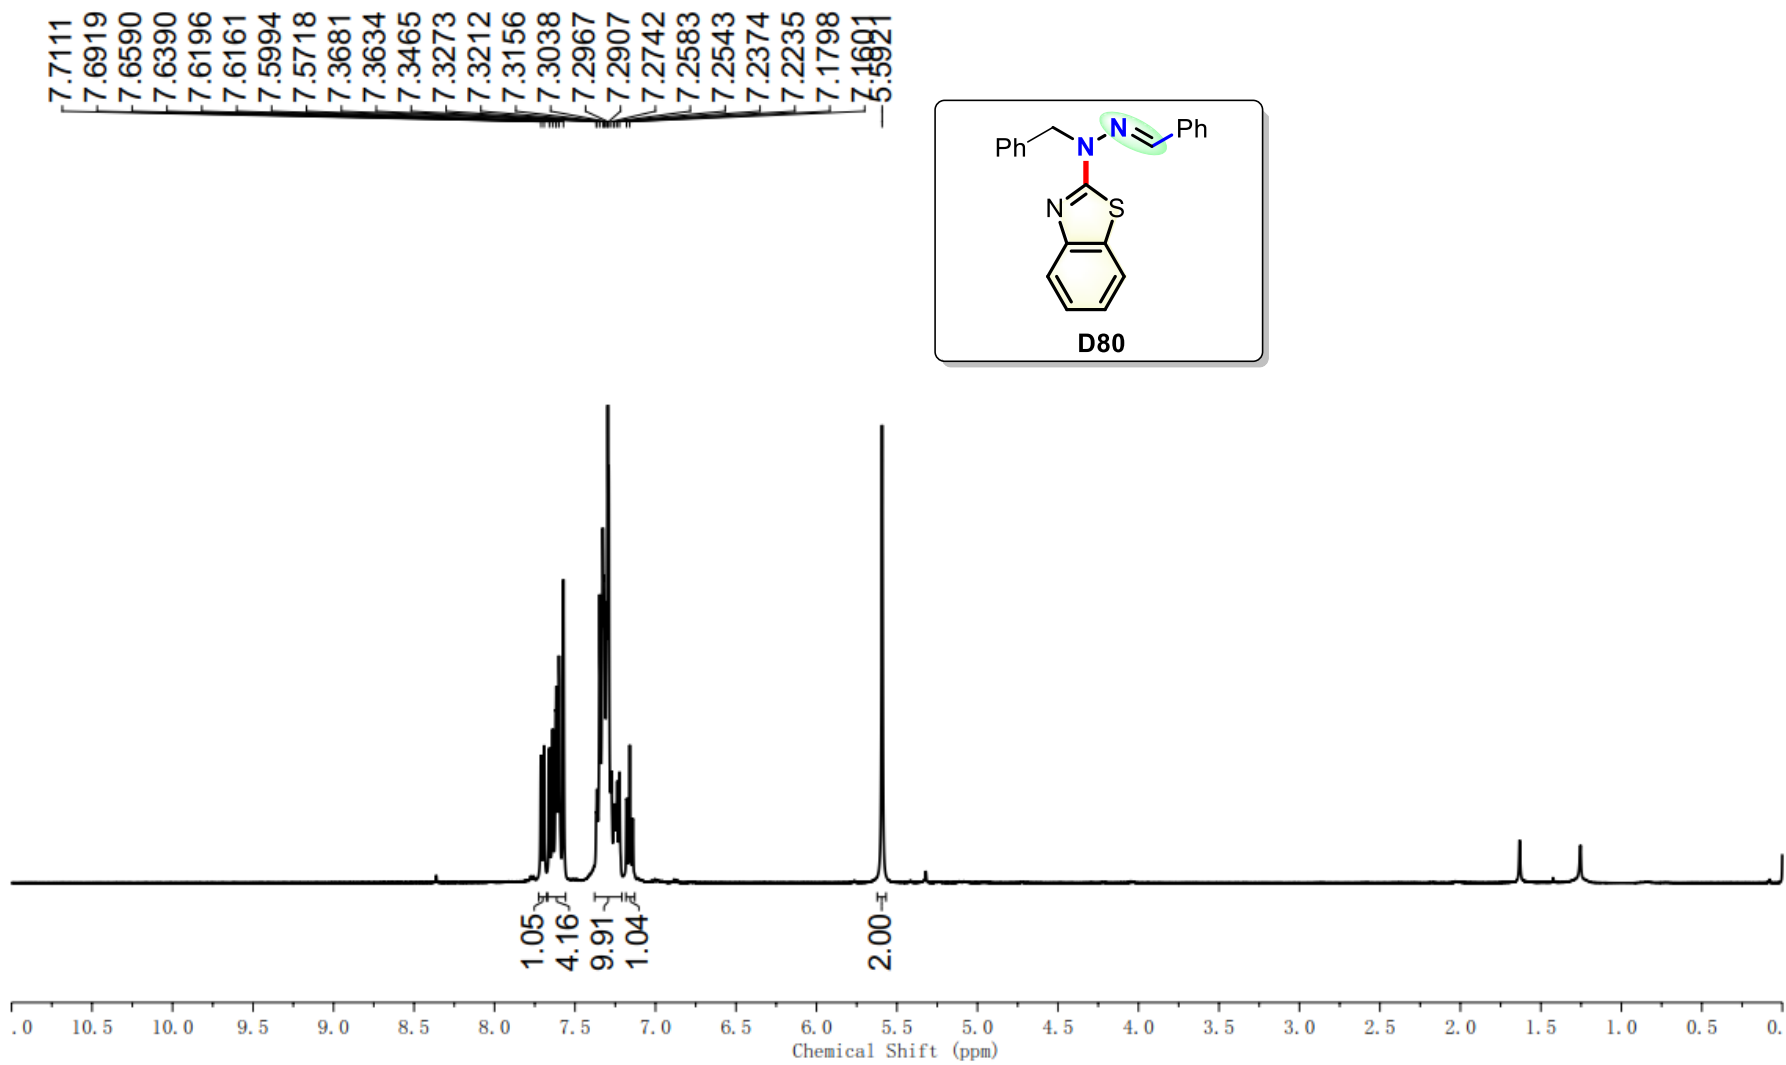

S305

2022-11-23-yy0024-616-1qq-f22

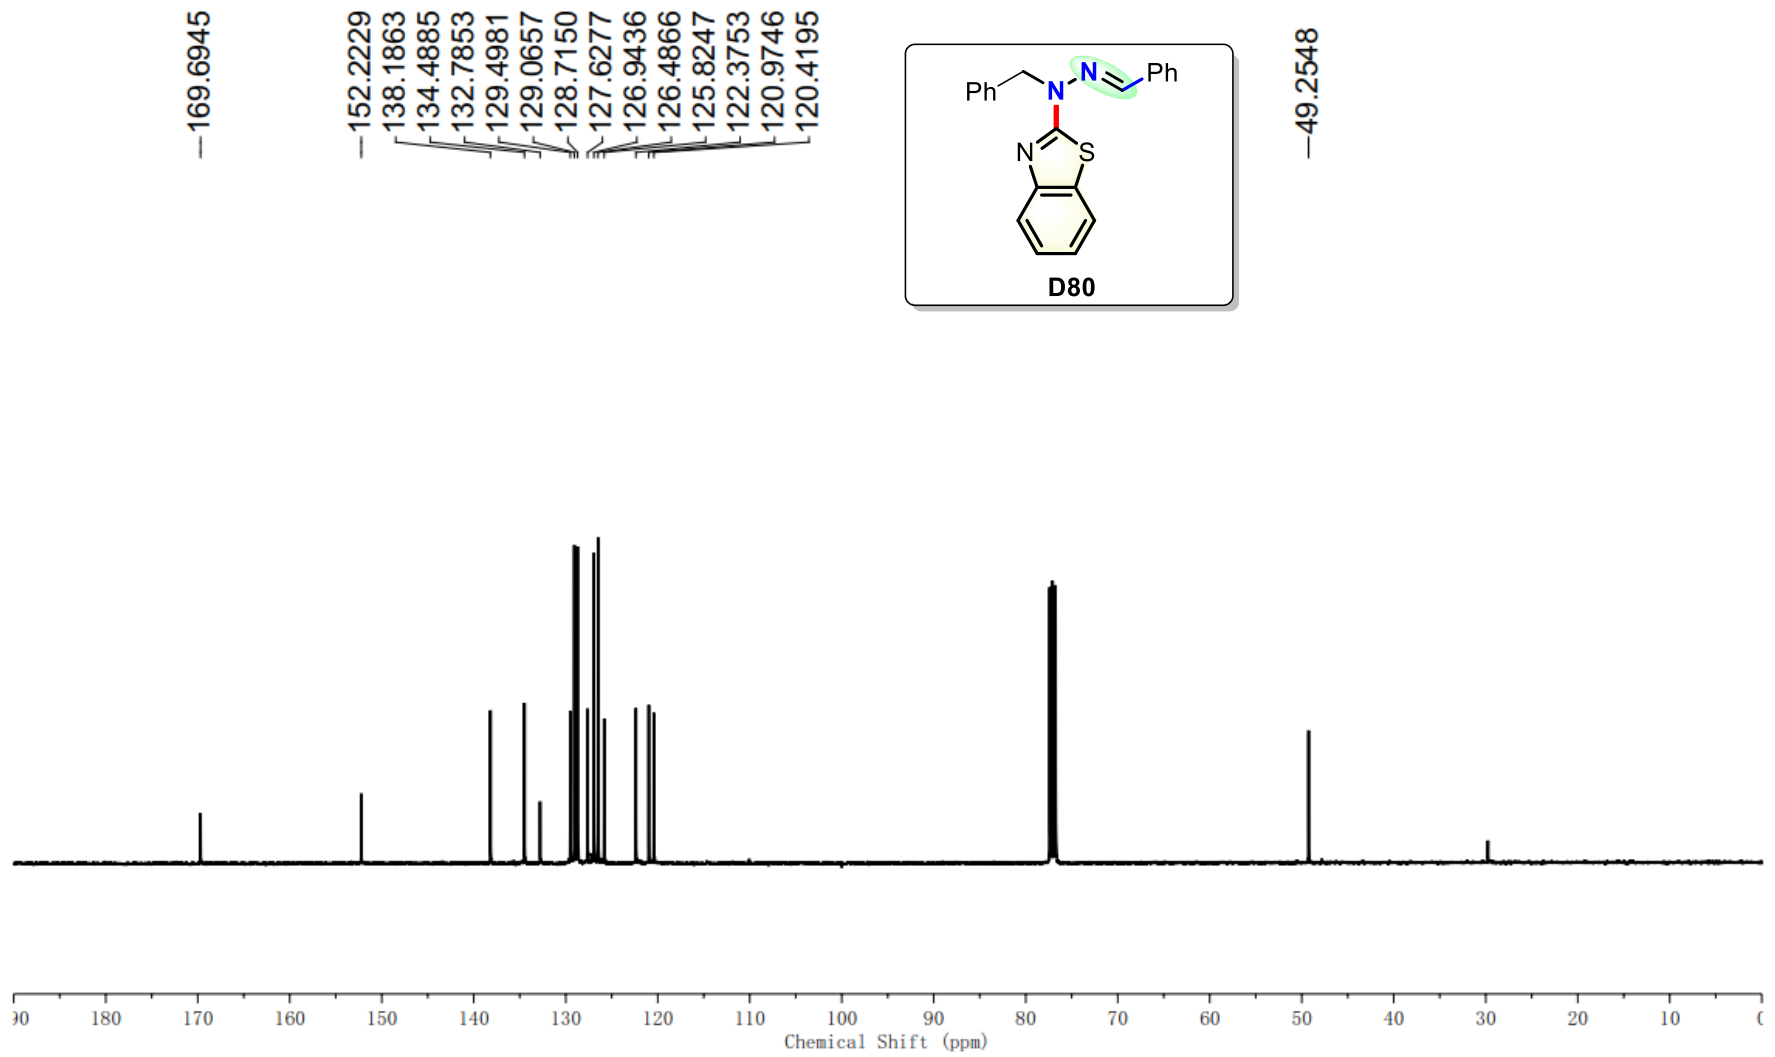

2022-12-02-yy0012-616-1qq-f21

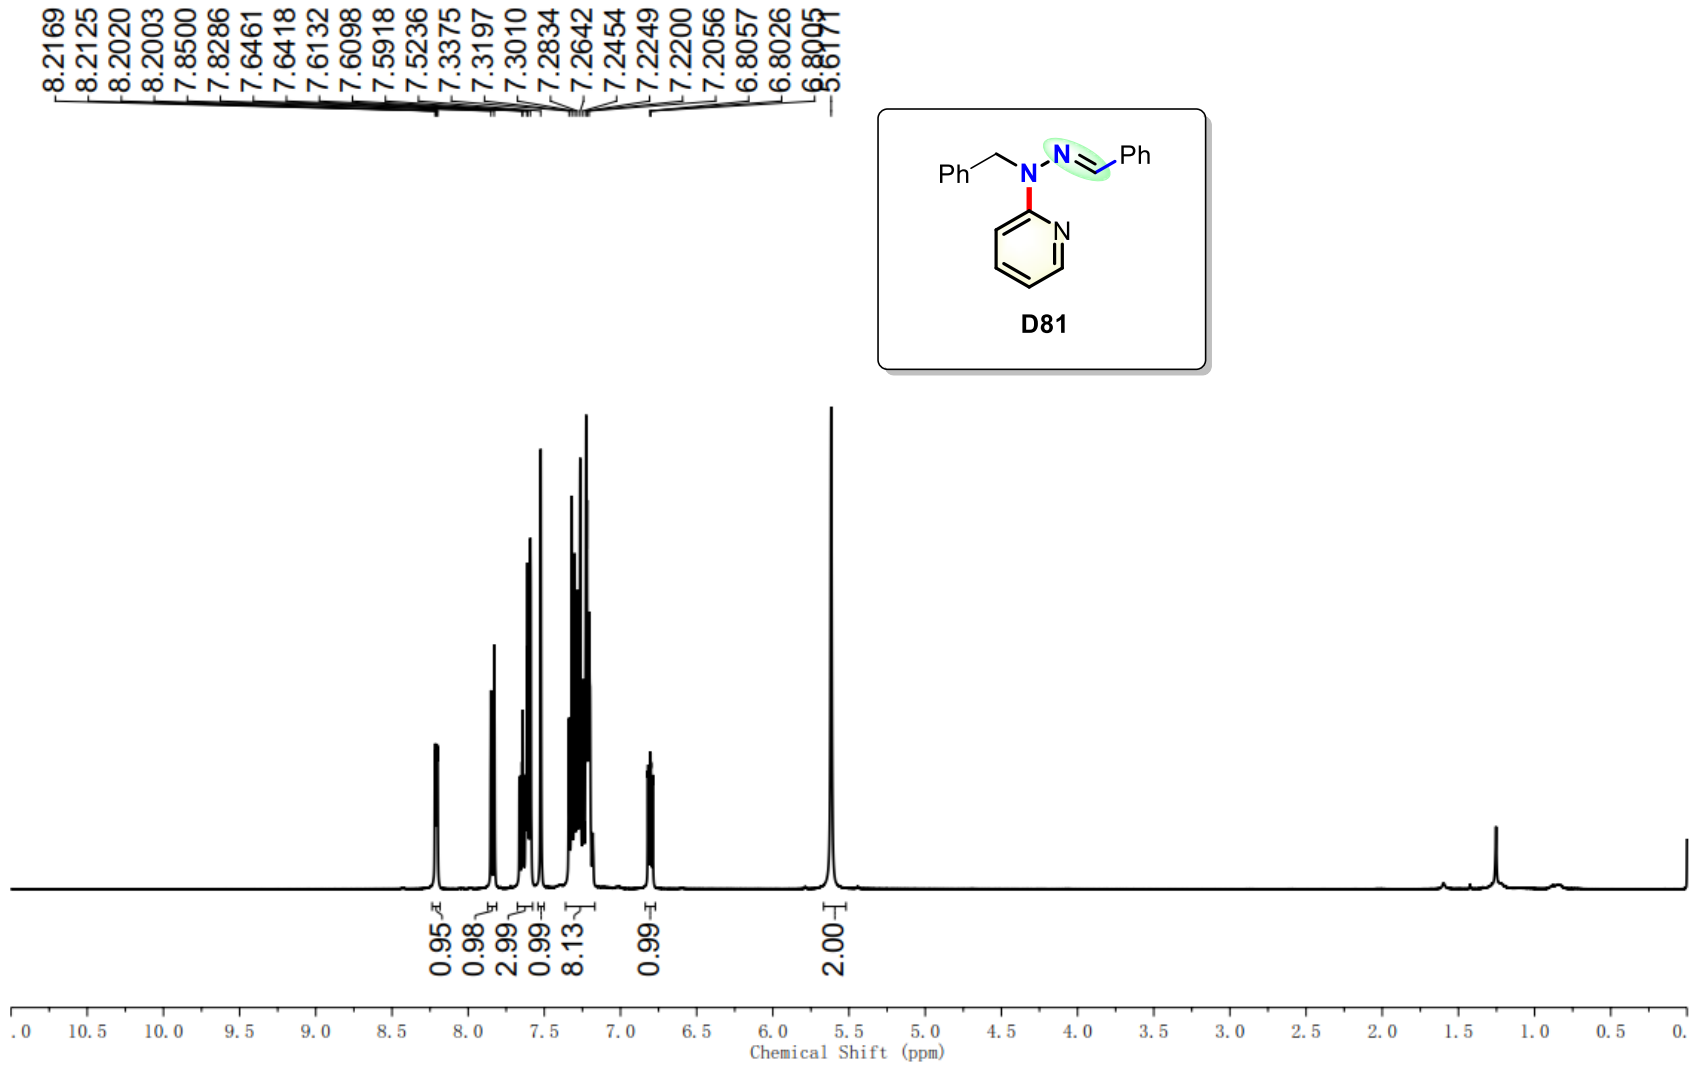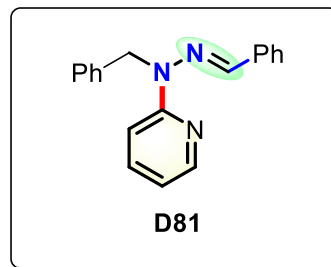

2022-12-6 yy0033 616-lqq-21

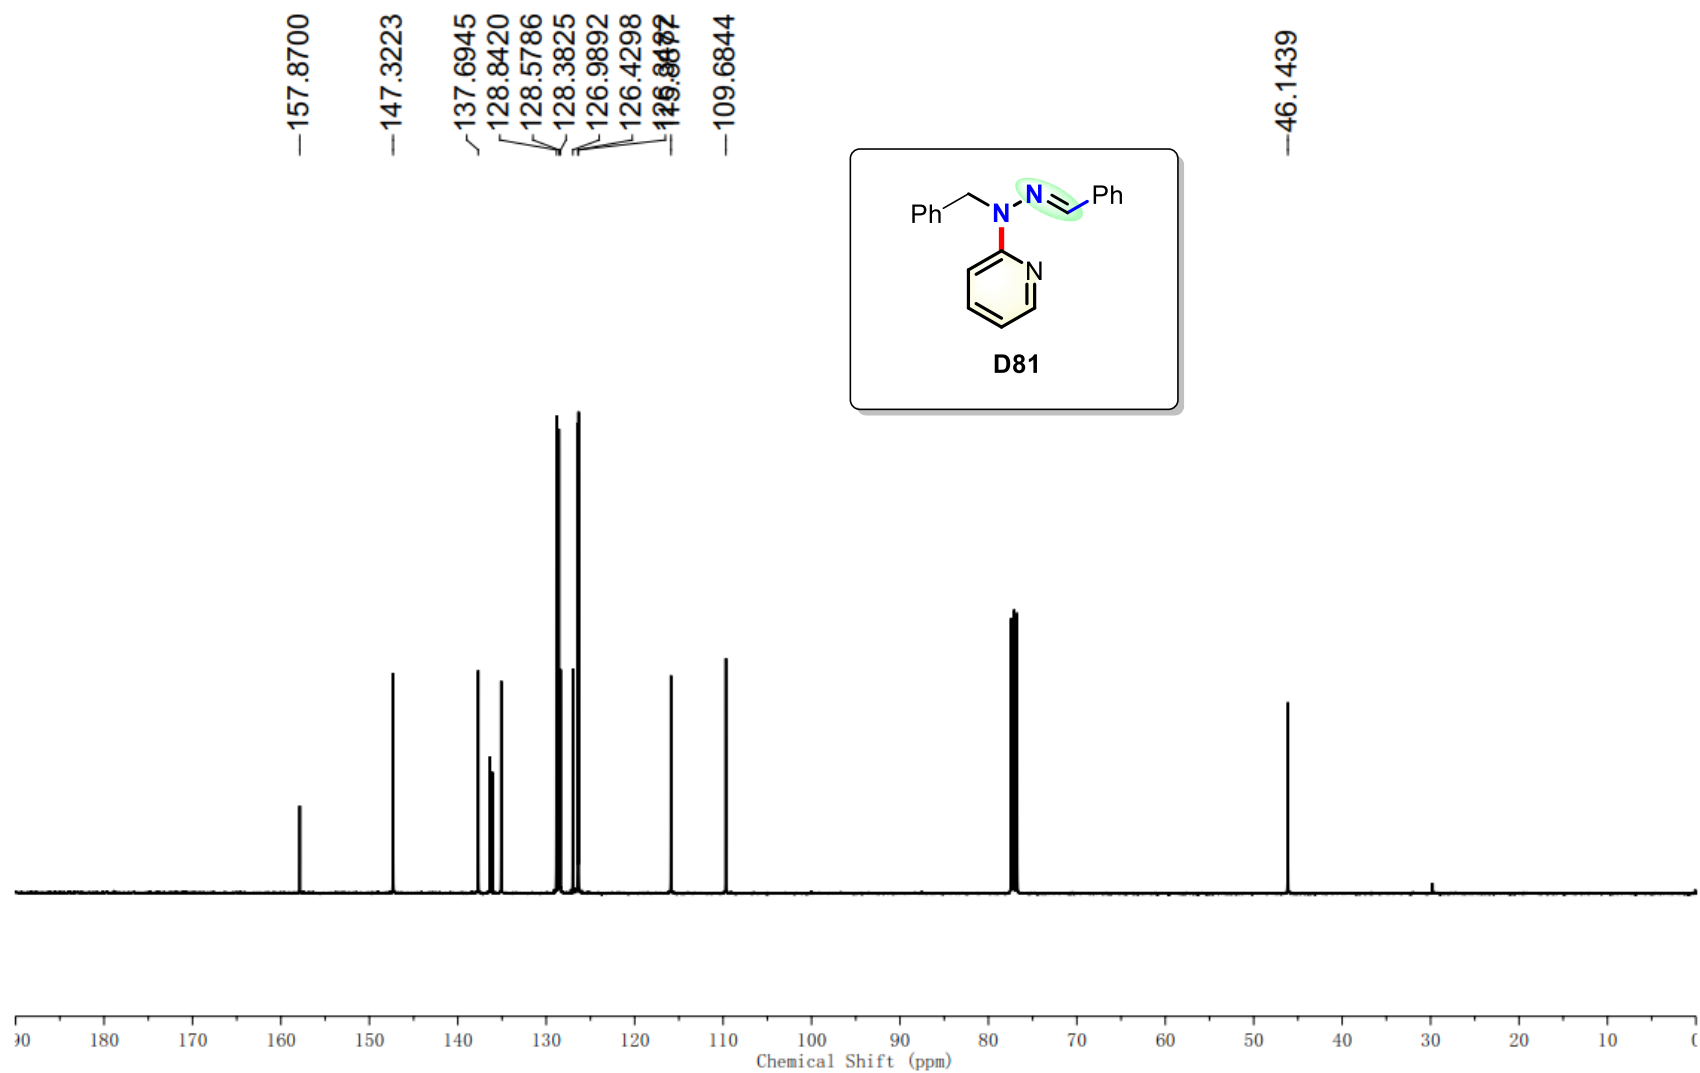

S308

2022-11-24 YY0014 616-1qq-F23

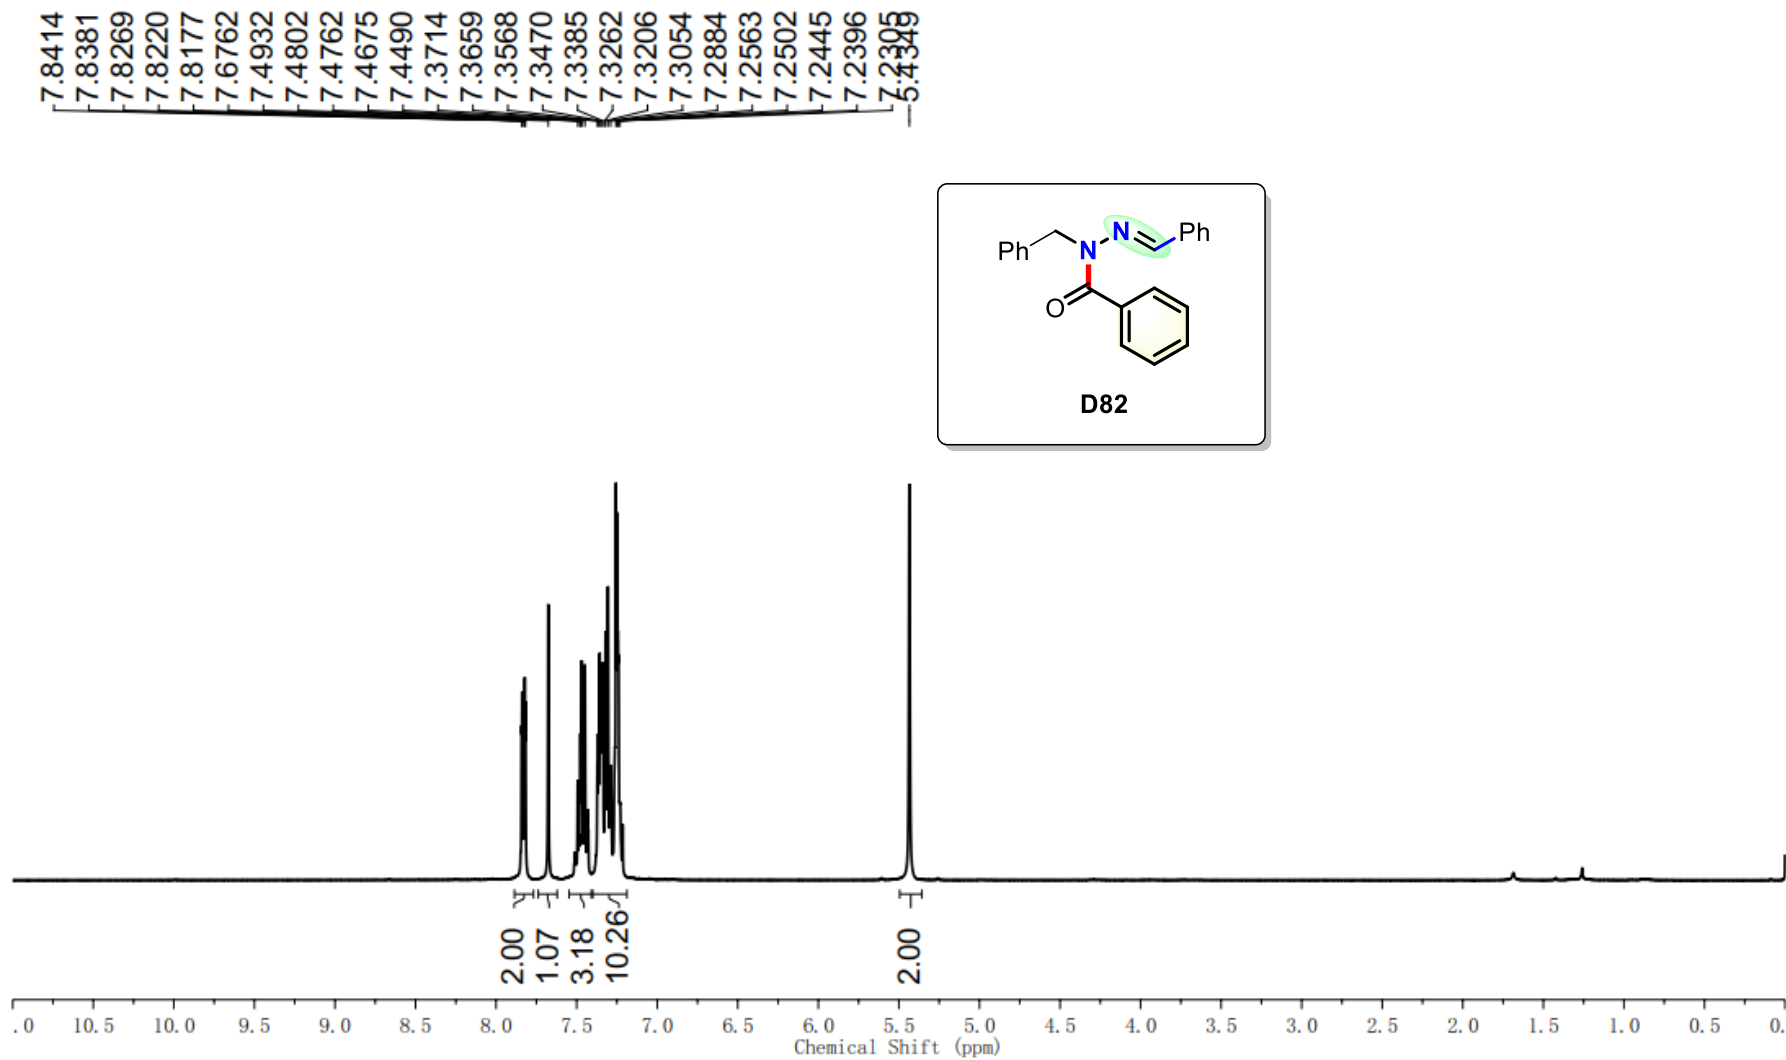

2022-11-30-yy0010-616-f23

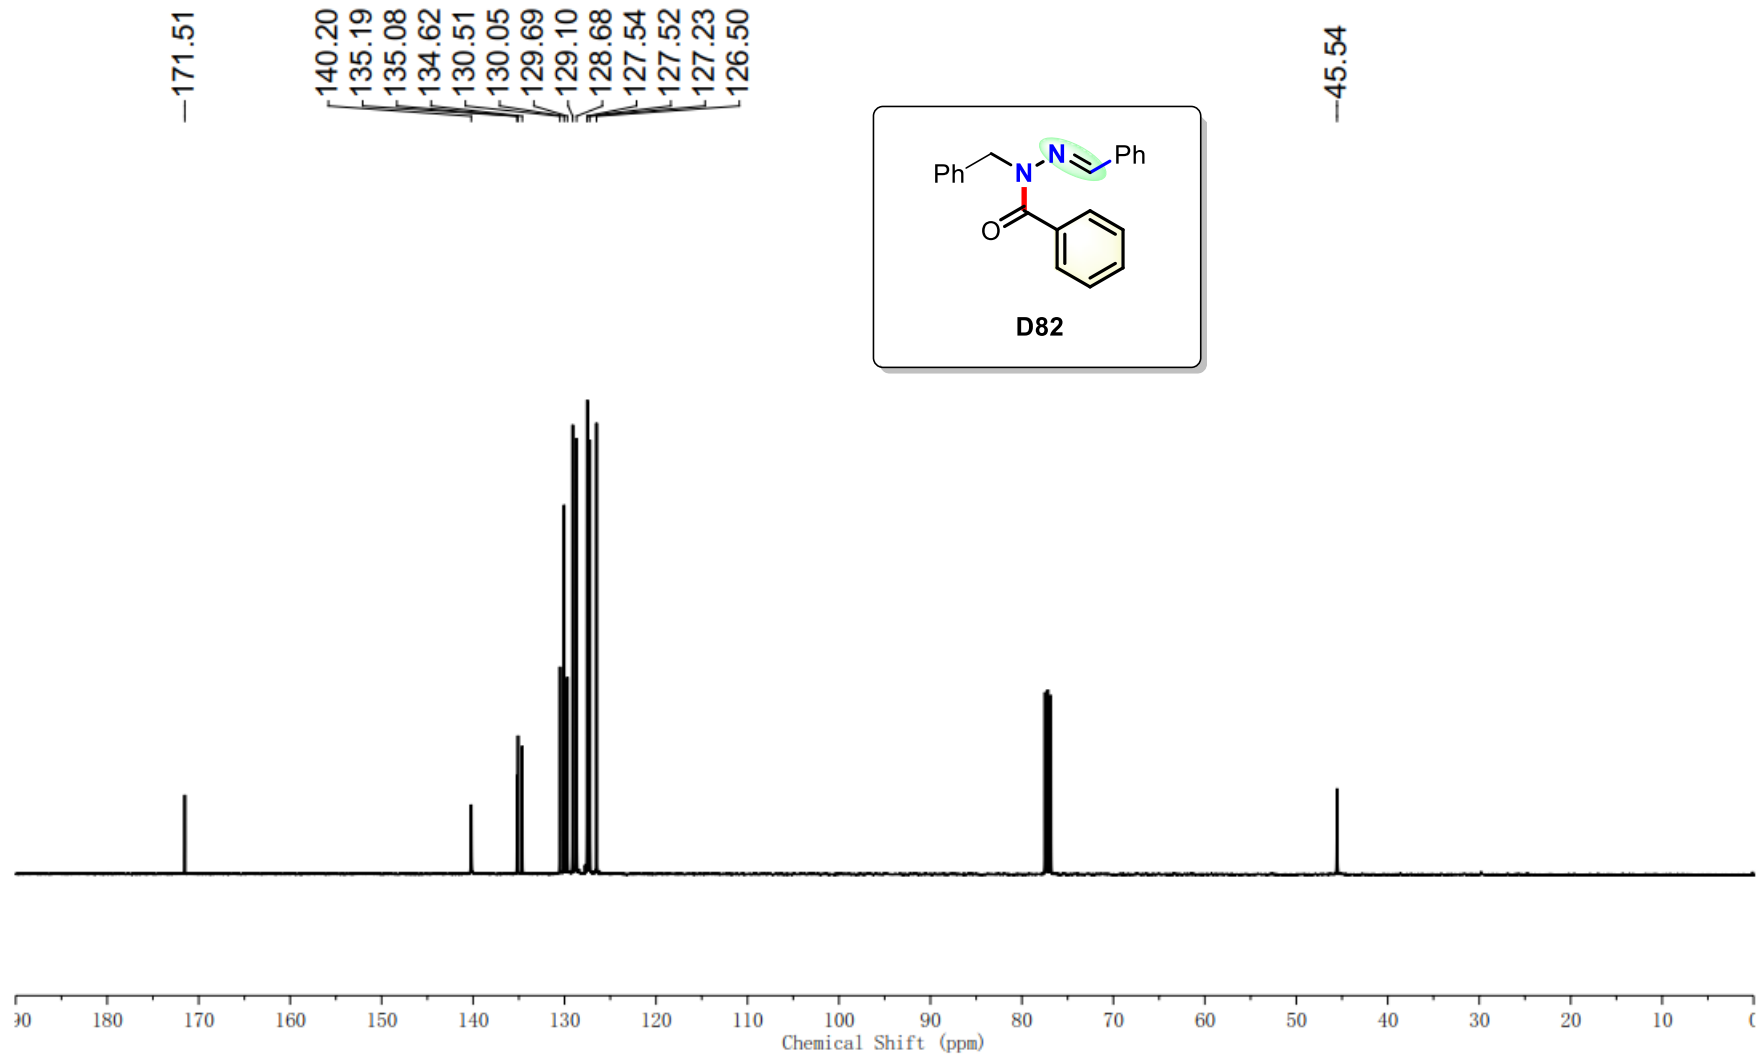

2022-10-24 YY0002 616-LQQ-20

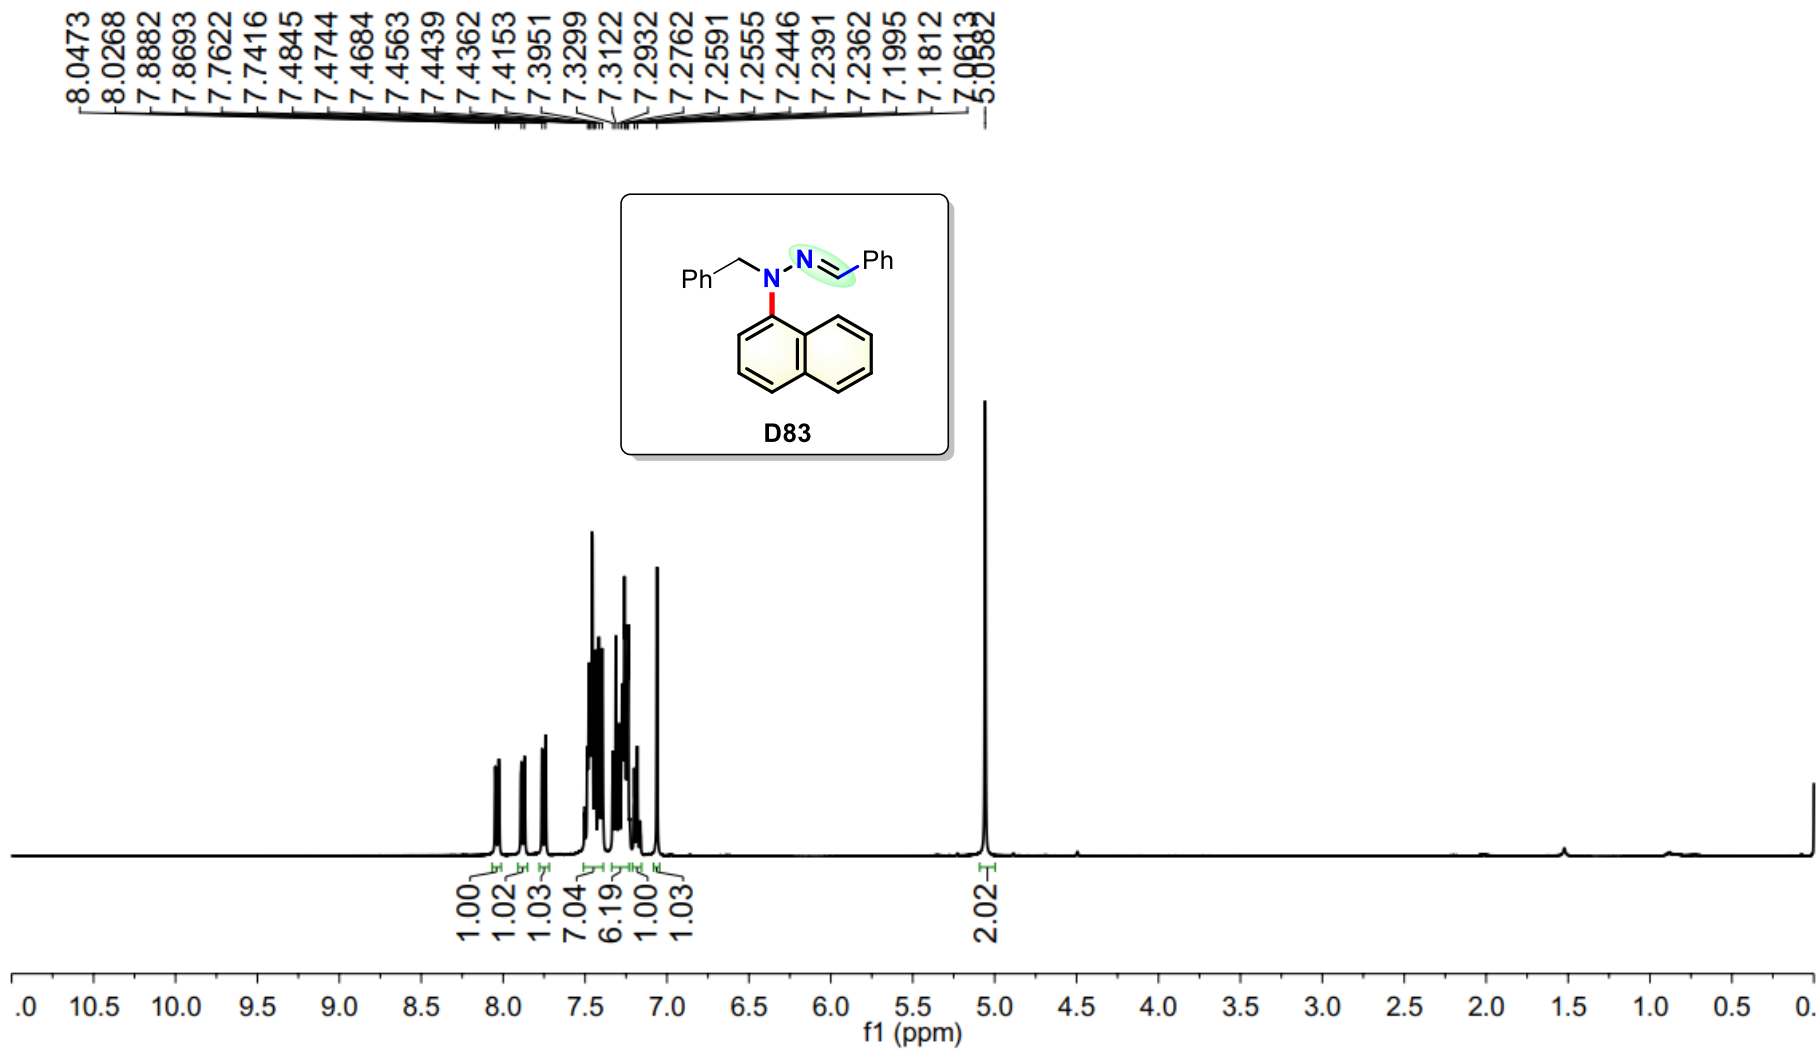

2022-10-26 yy0025 616 LQQ-20

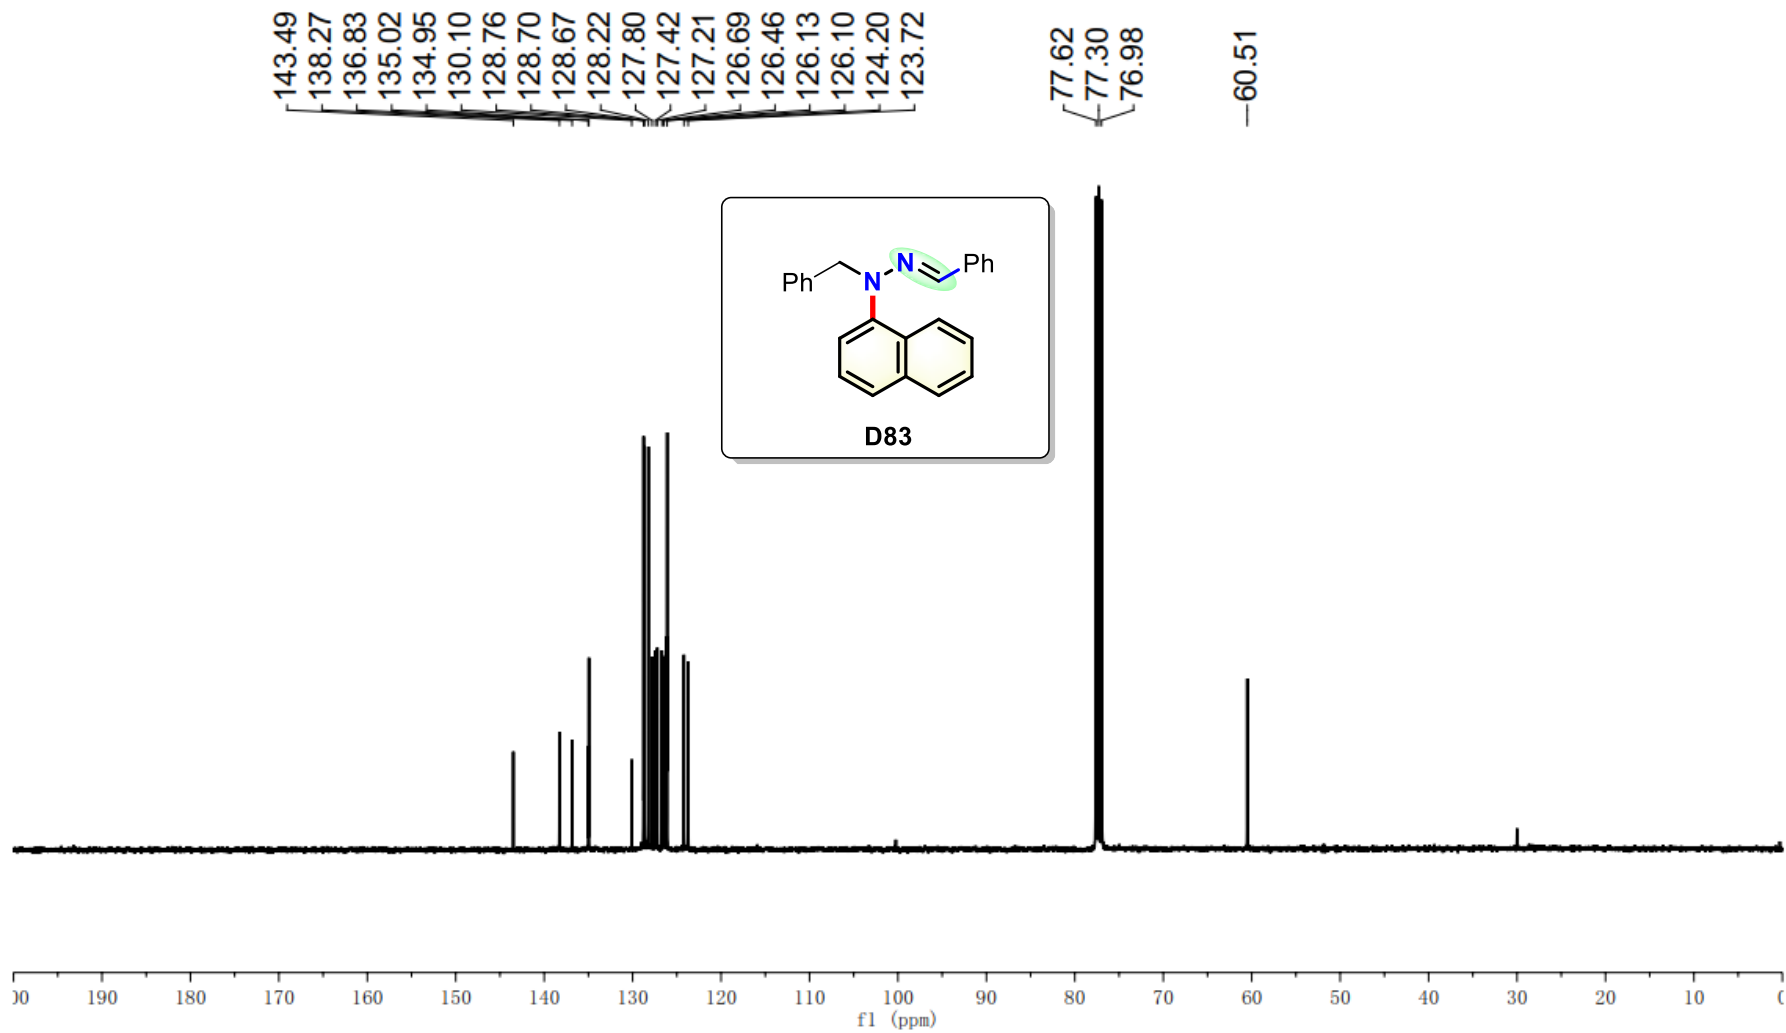



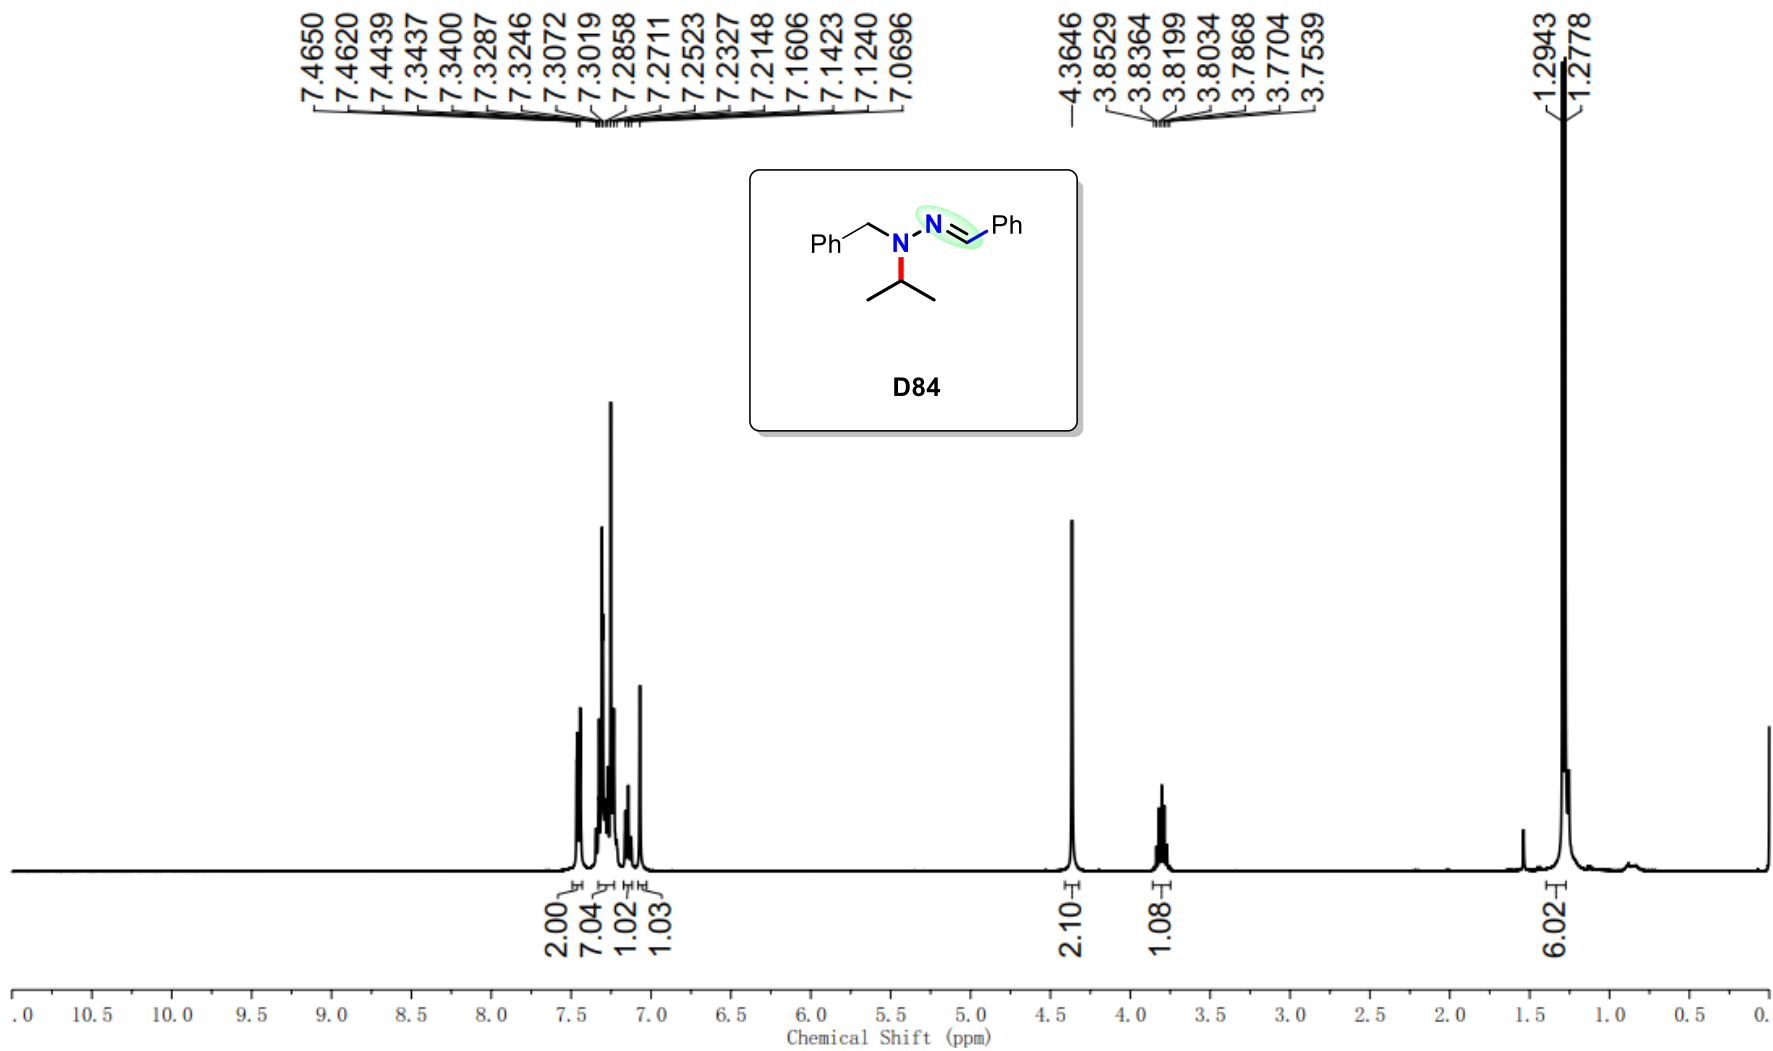

2022-12-02-yy0013-616-lqq-f26

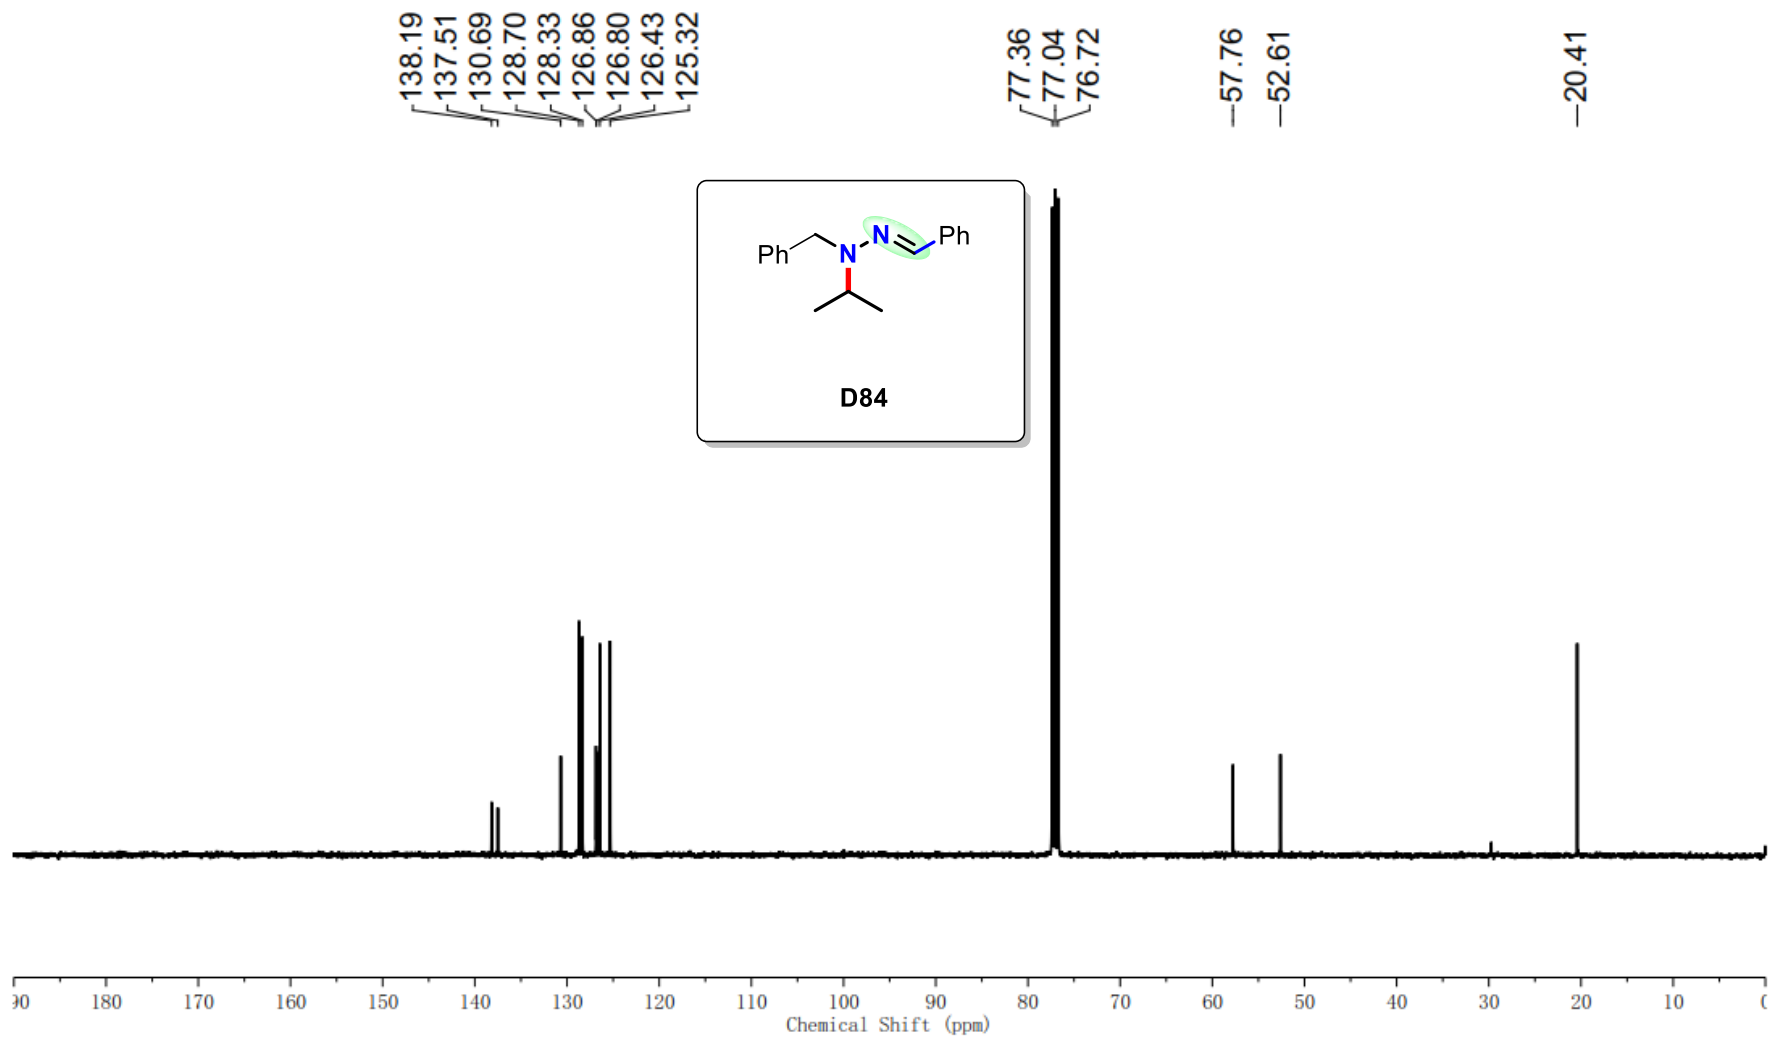

2022-11-14 yy0044 616-lqq-28

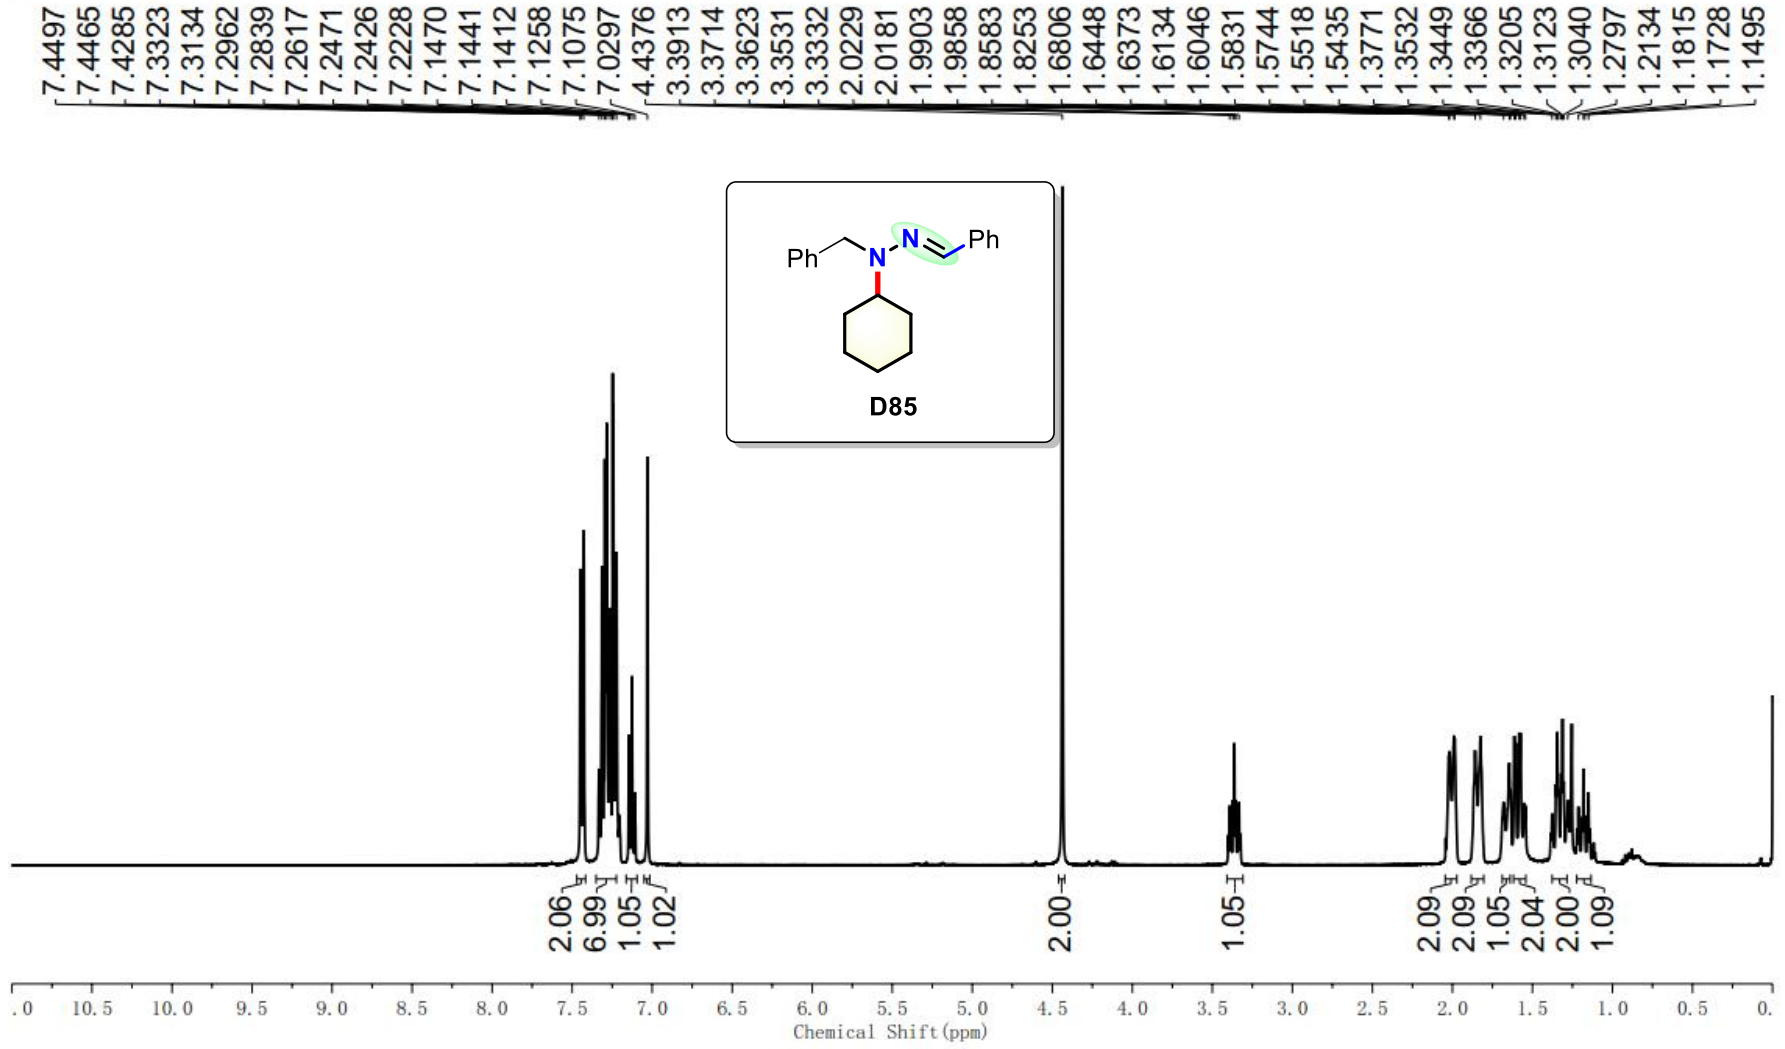

S315

2022-11-17 yy001 616 1qq-28

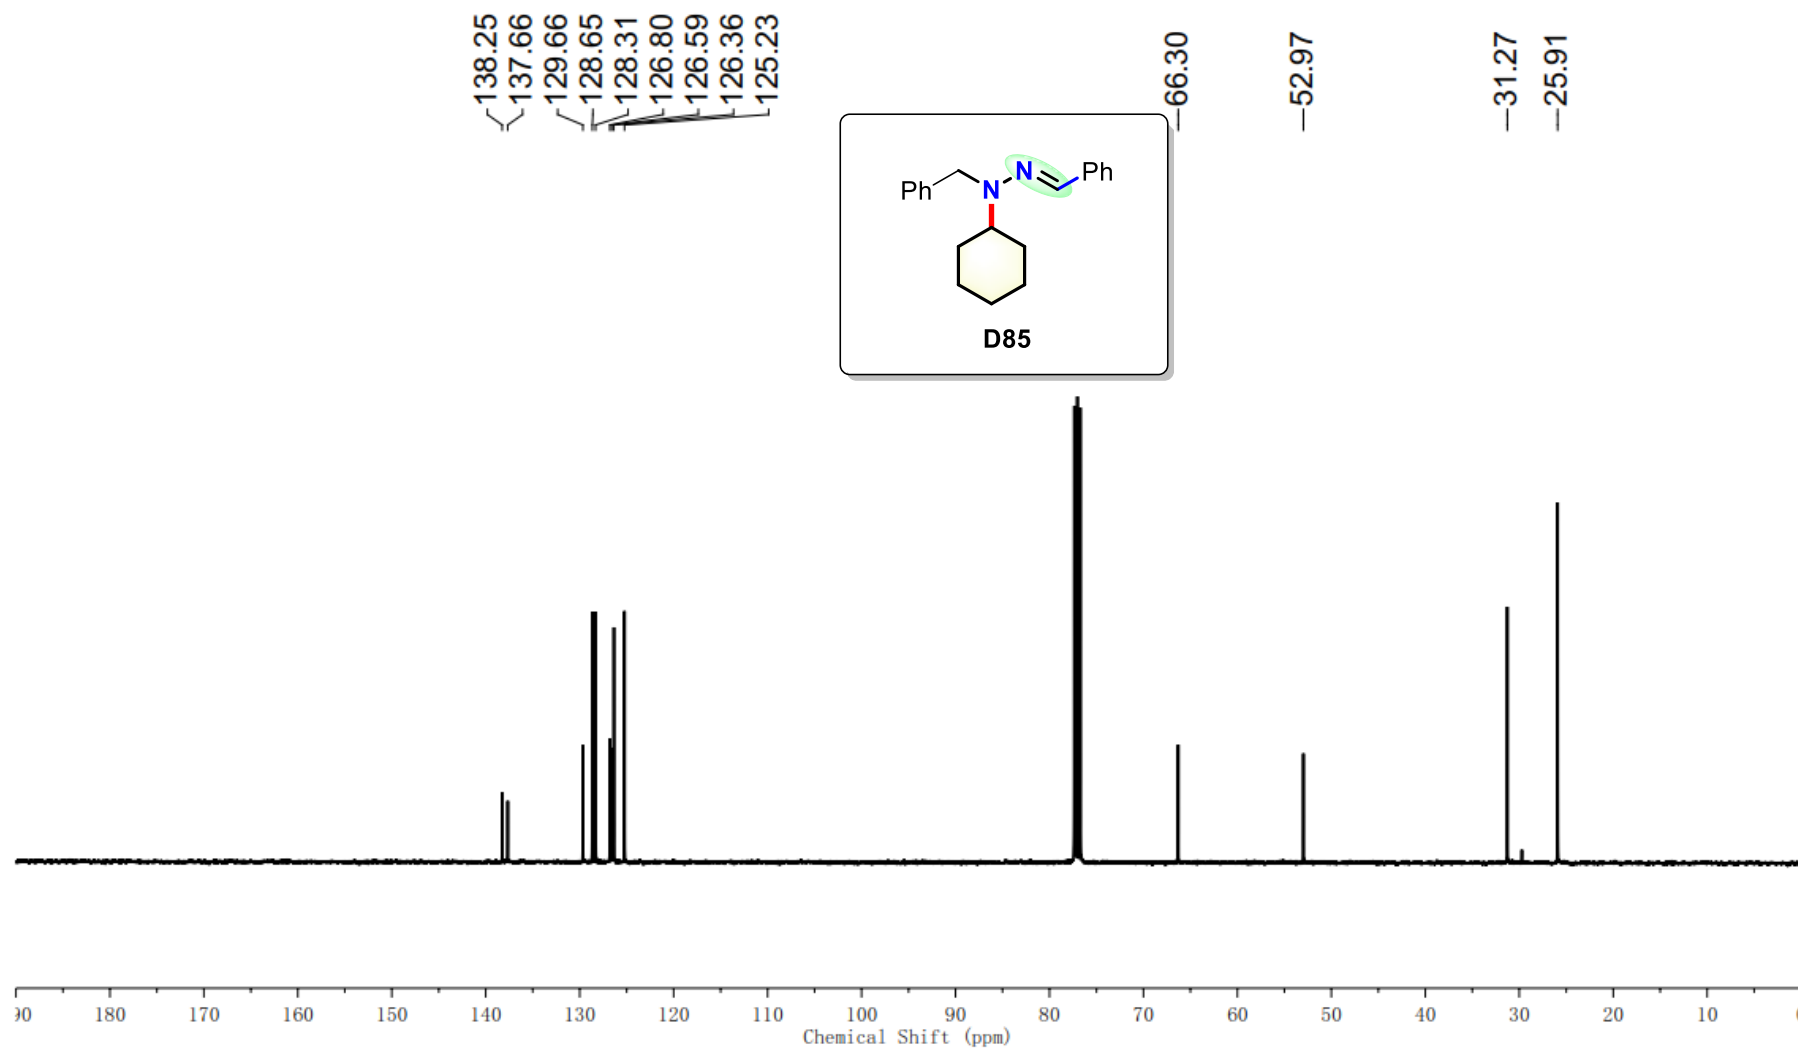

2022-08-15 YY0014 616-LQQ-B28.10.fid

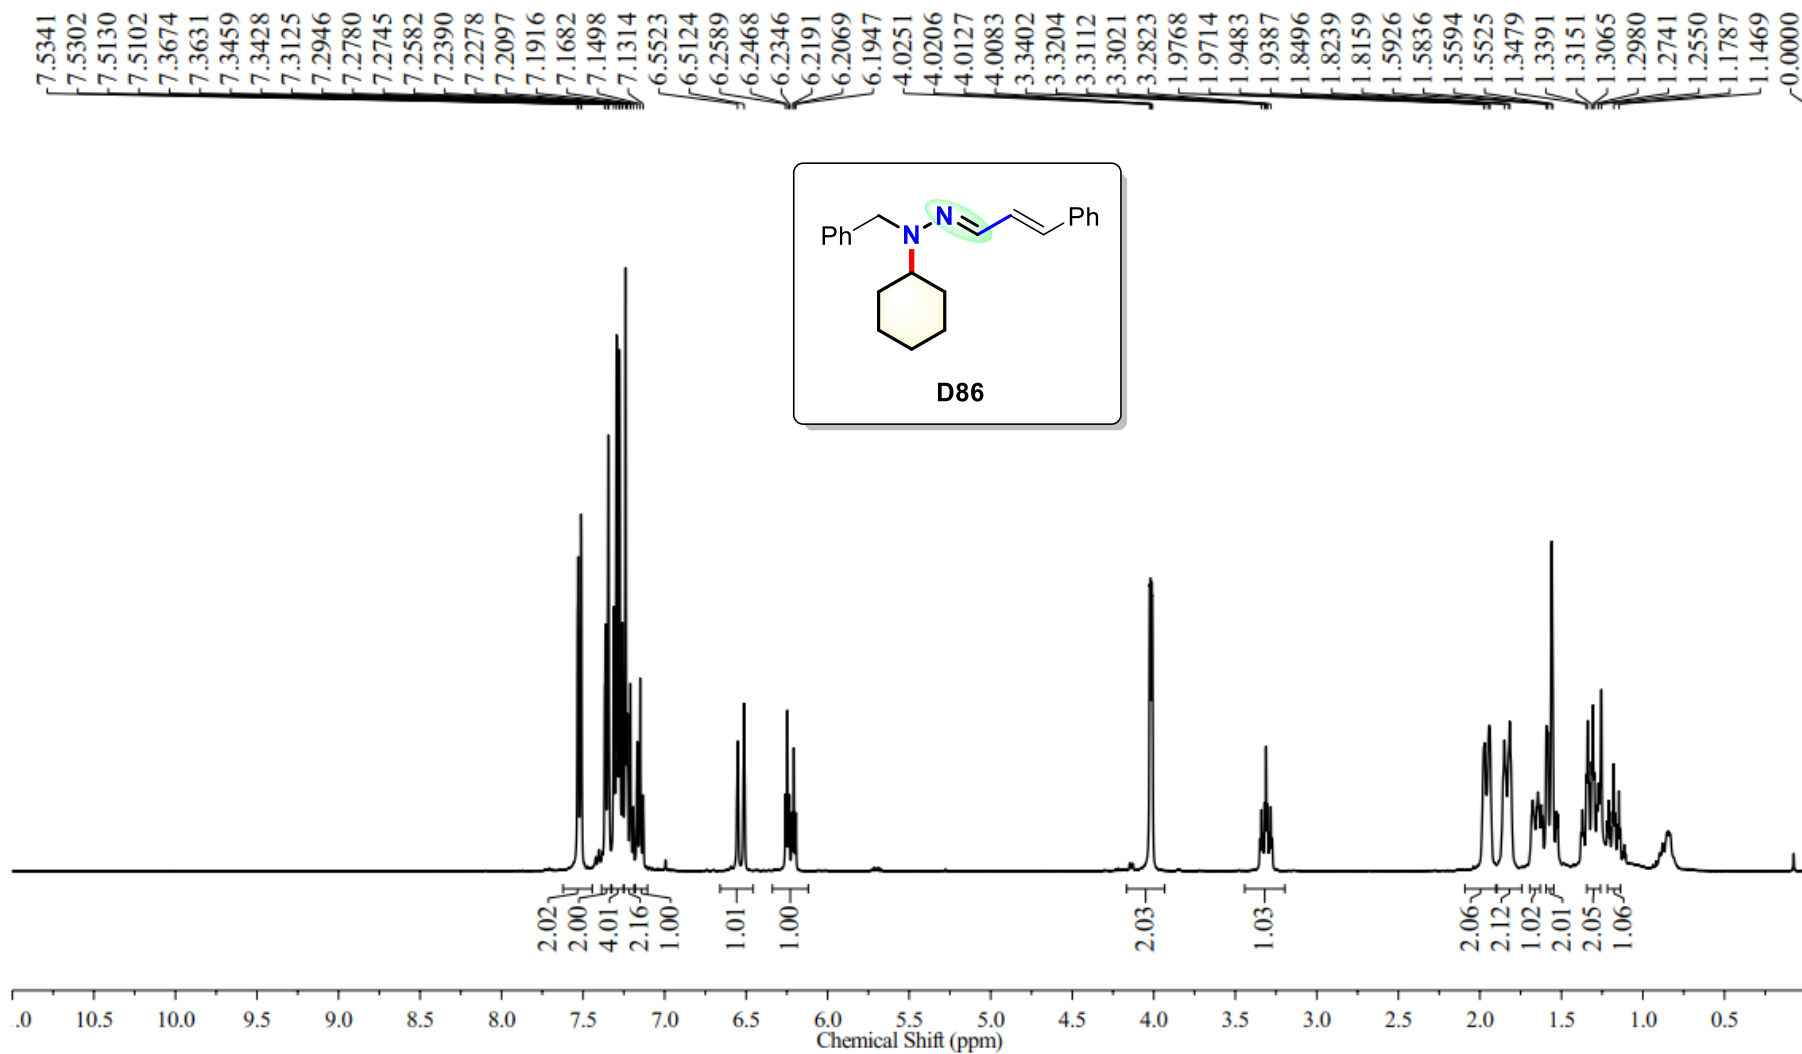

2022-08-15 YY0014 616-LQQ-B28.11.fid

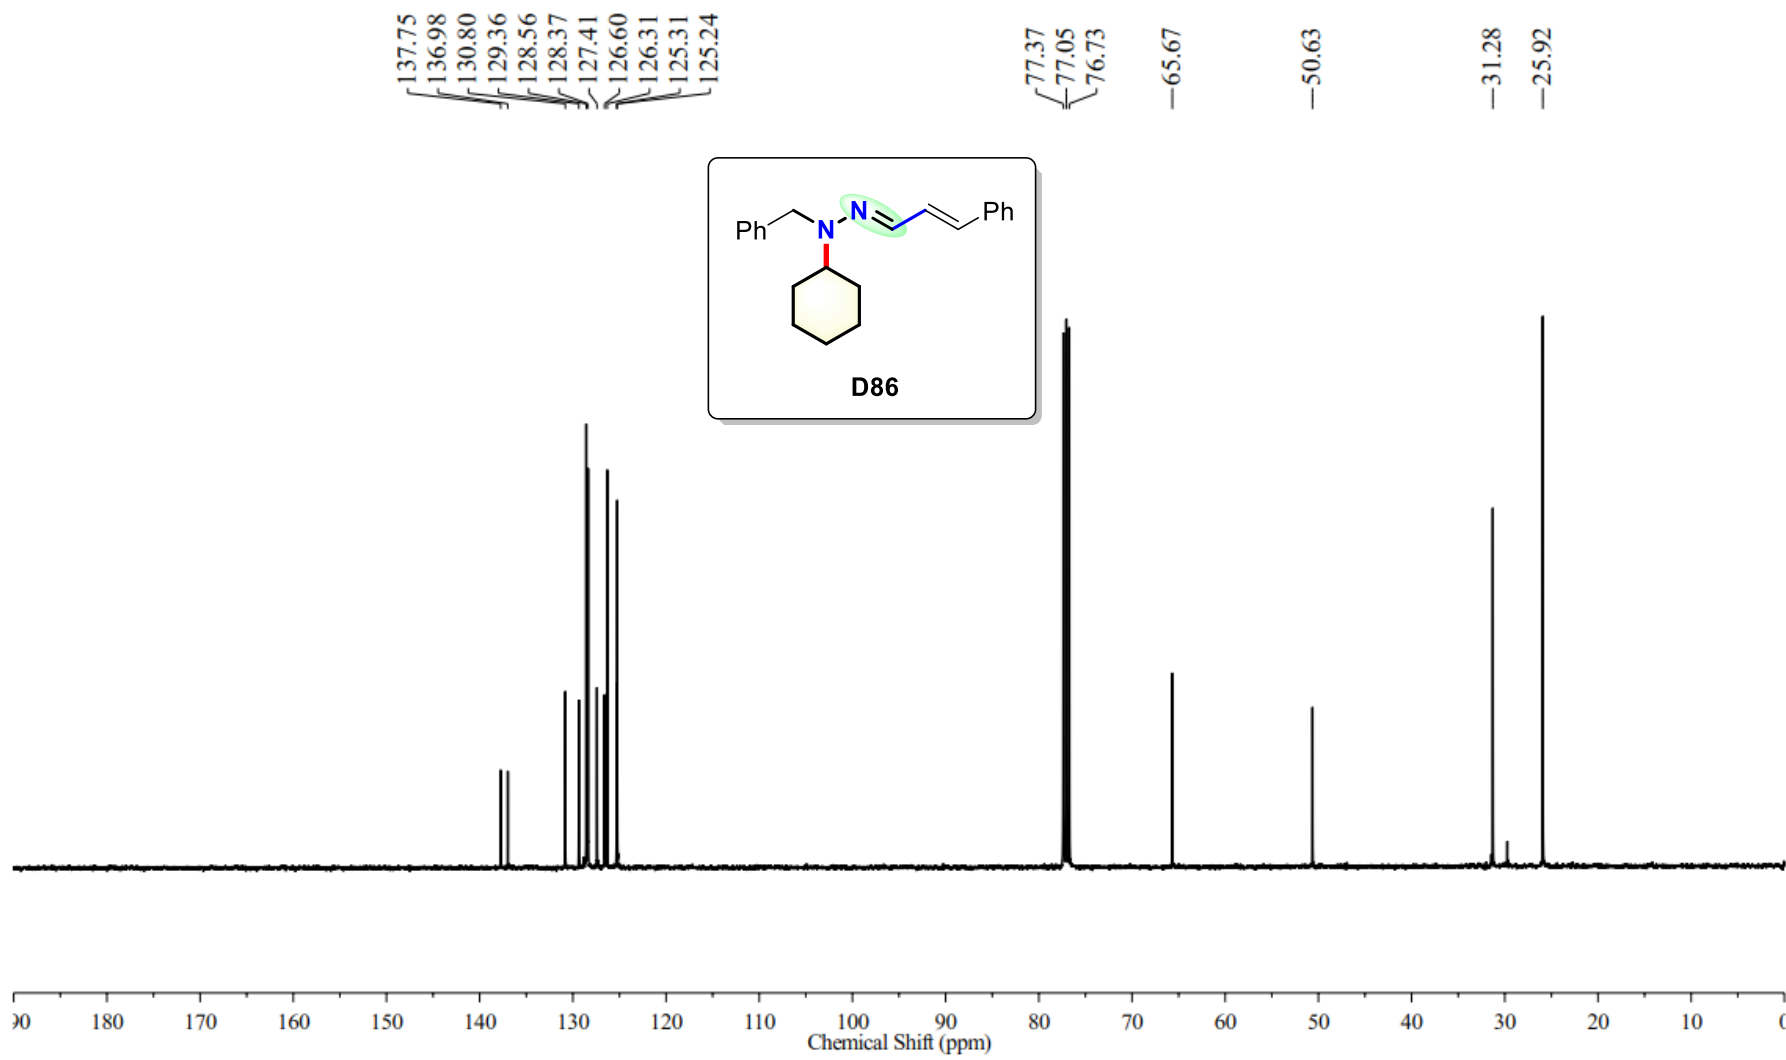

2022-11-24 YY0014 616-lqq-F32

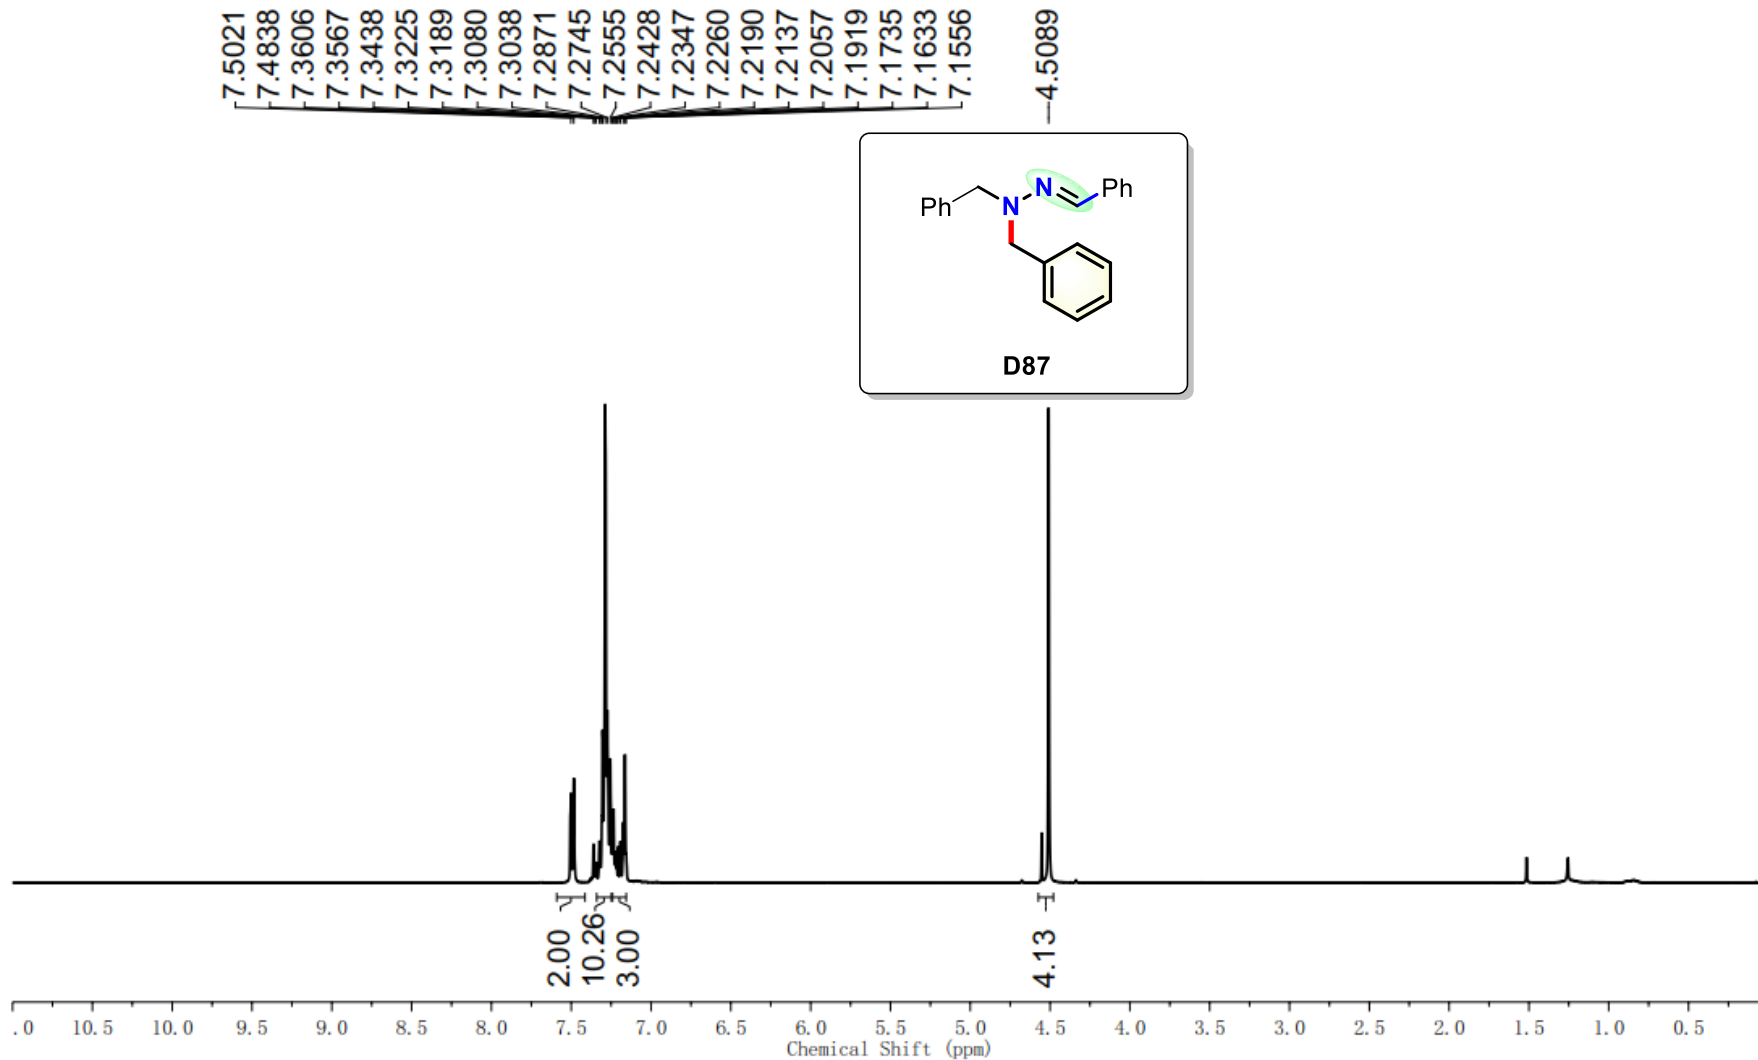

2022-12-02-yy0013-616-lqq-f32

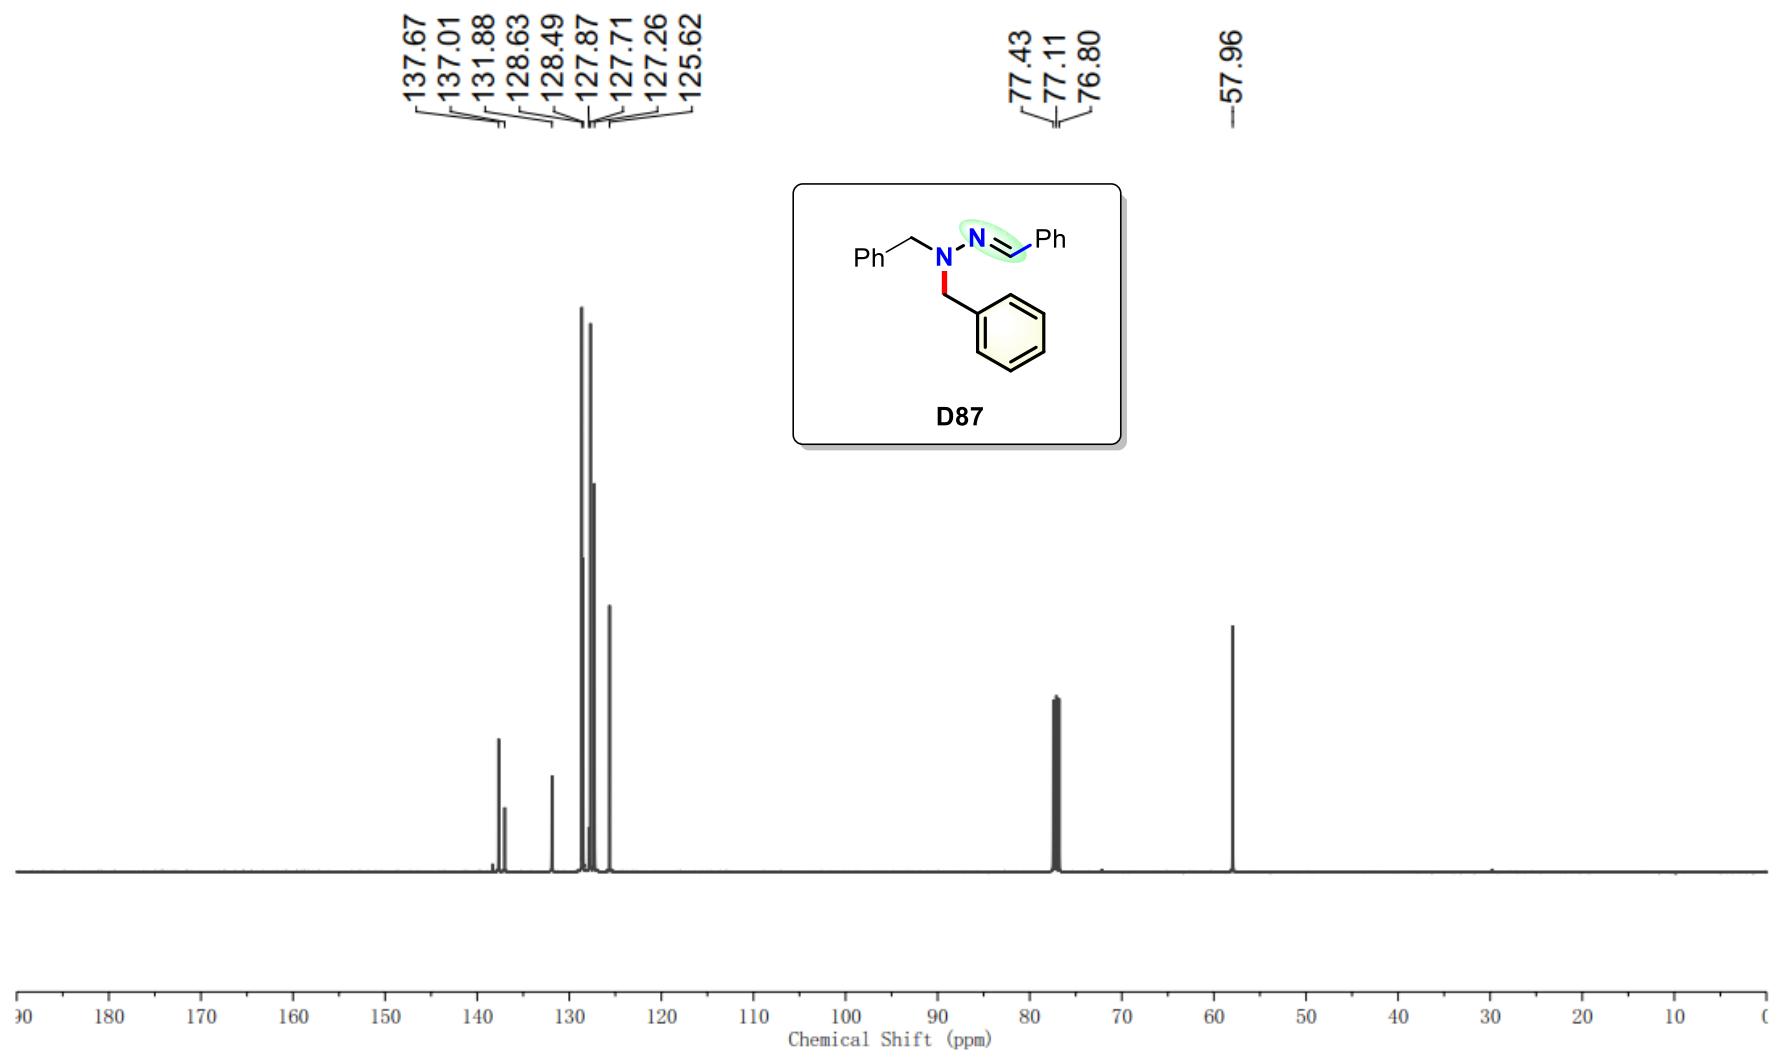

S320



2022-12-02-yy0012-616-1qq-f29

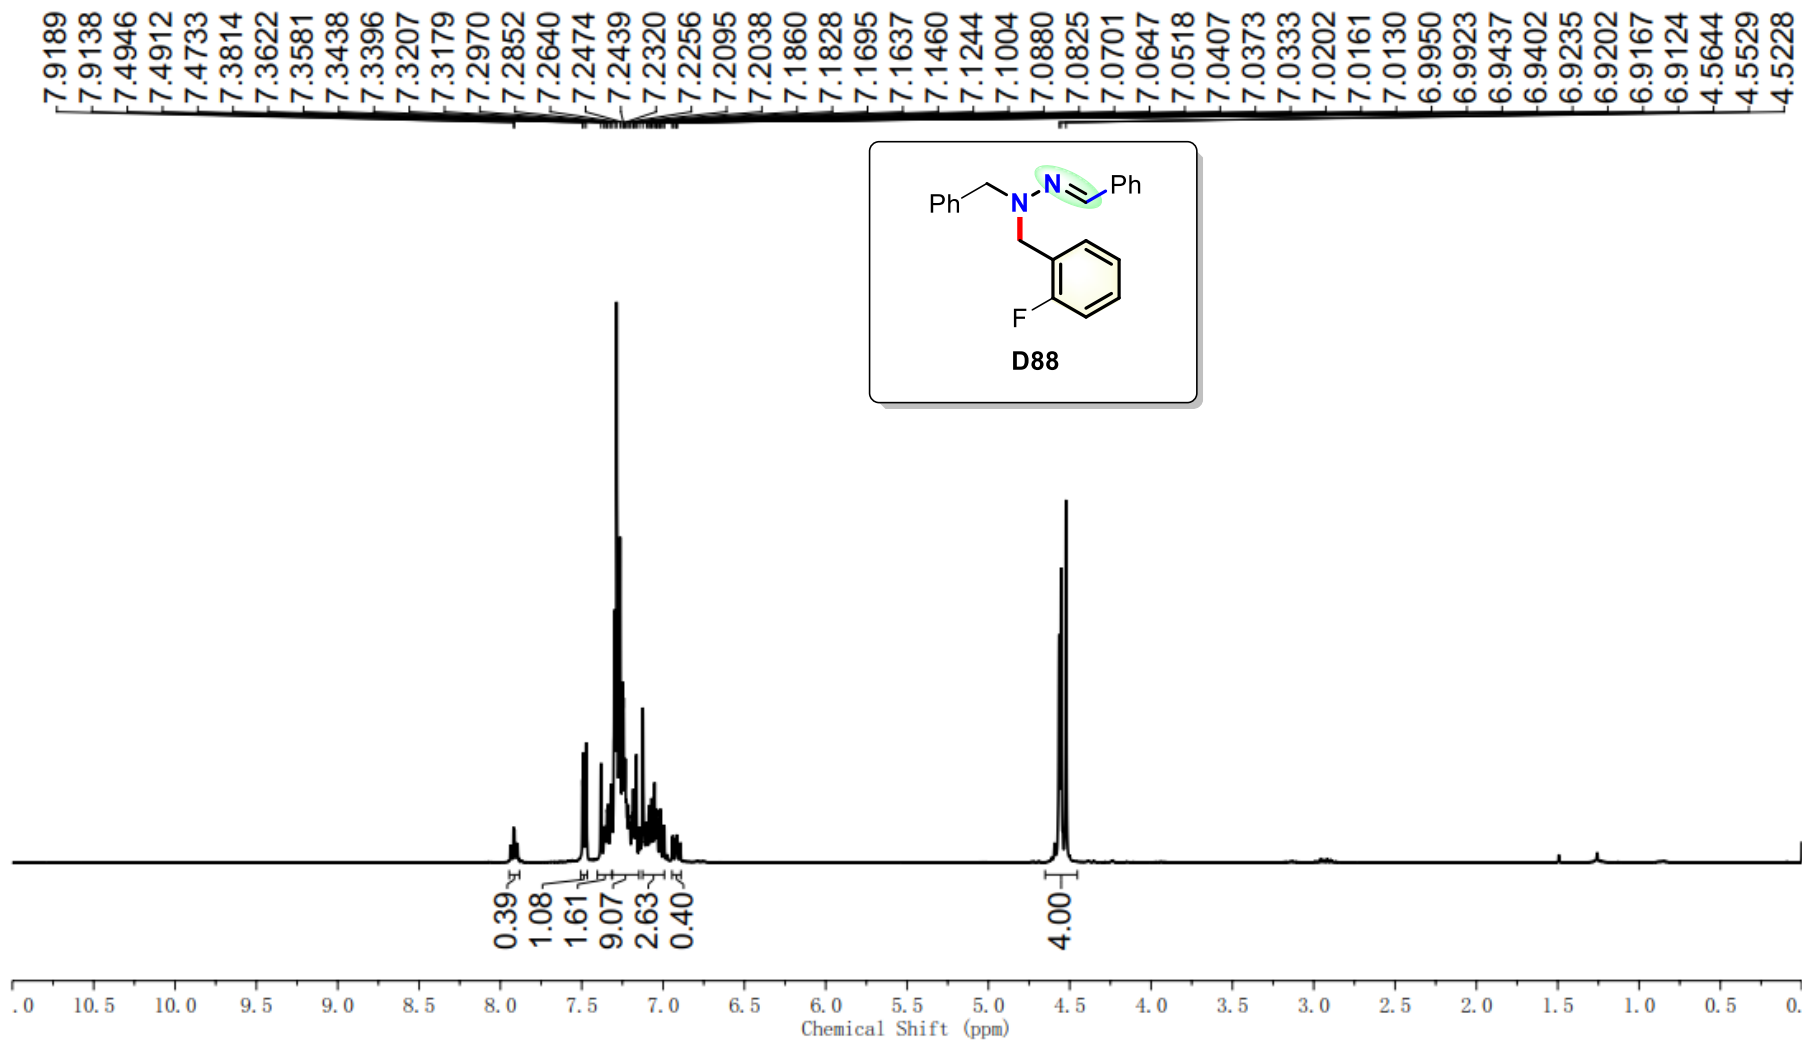

2022-12-6 yy0033 616-lqq-29

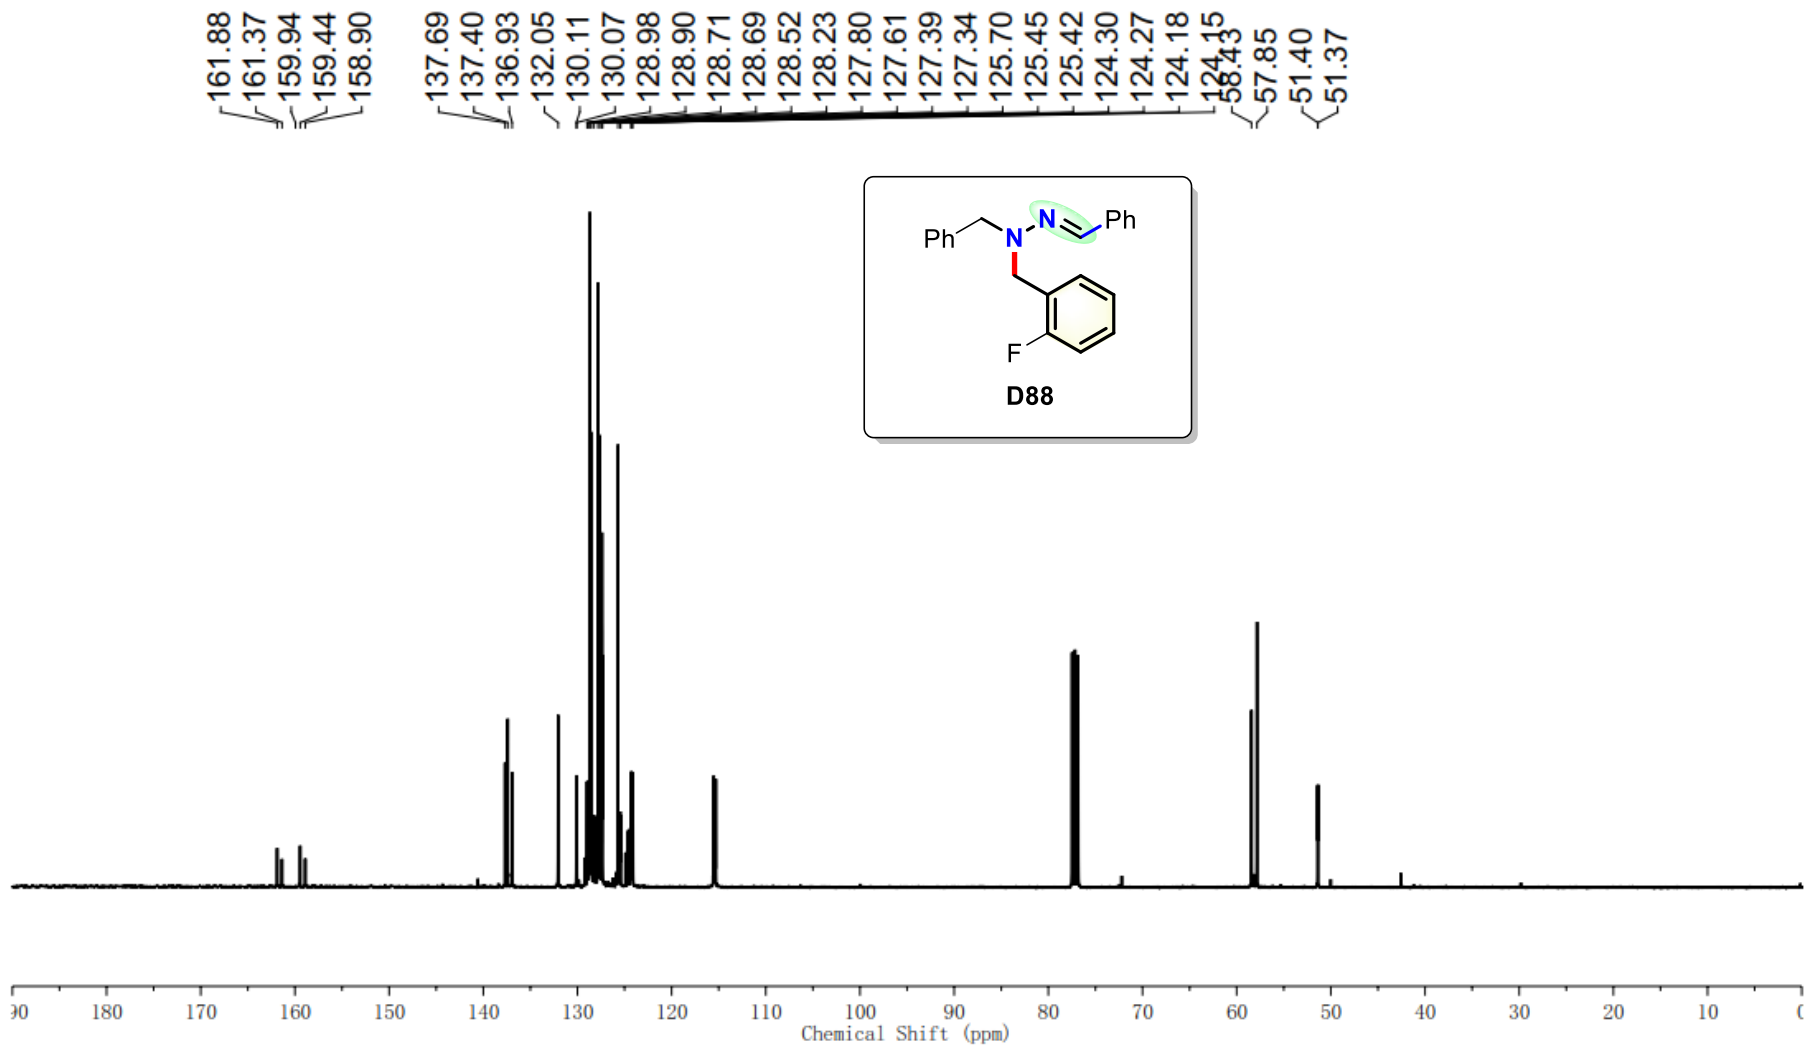

2022-07-18-yy0004-616-1-b5.10.fid

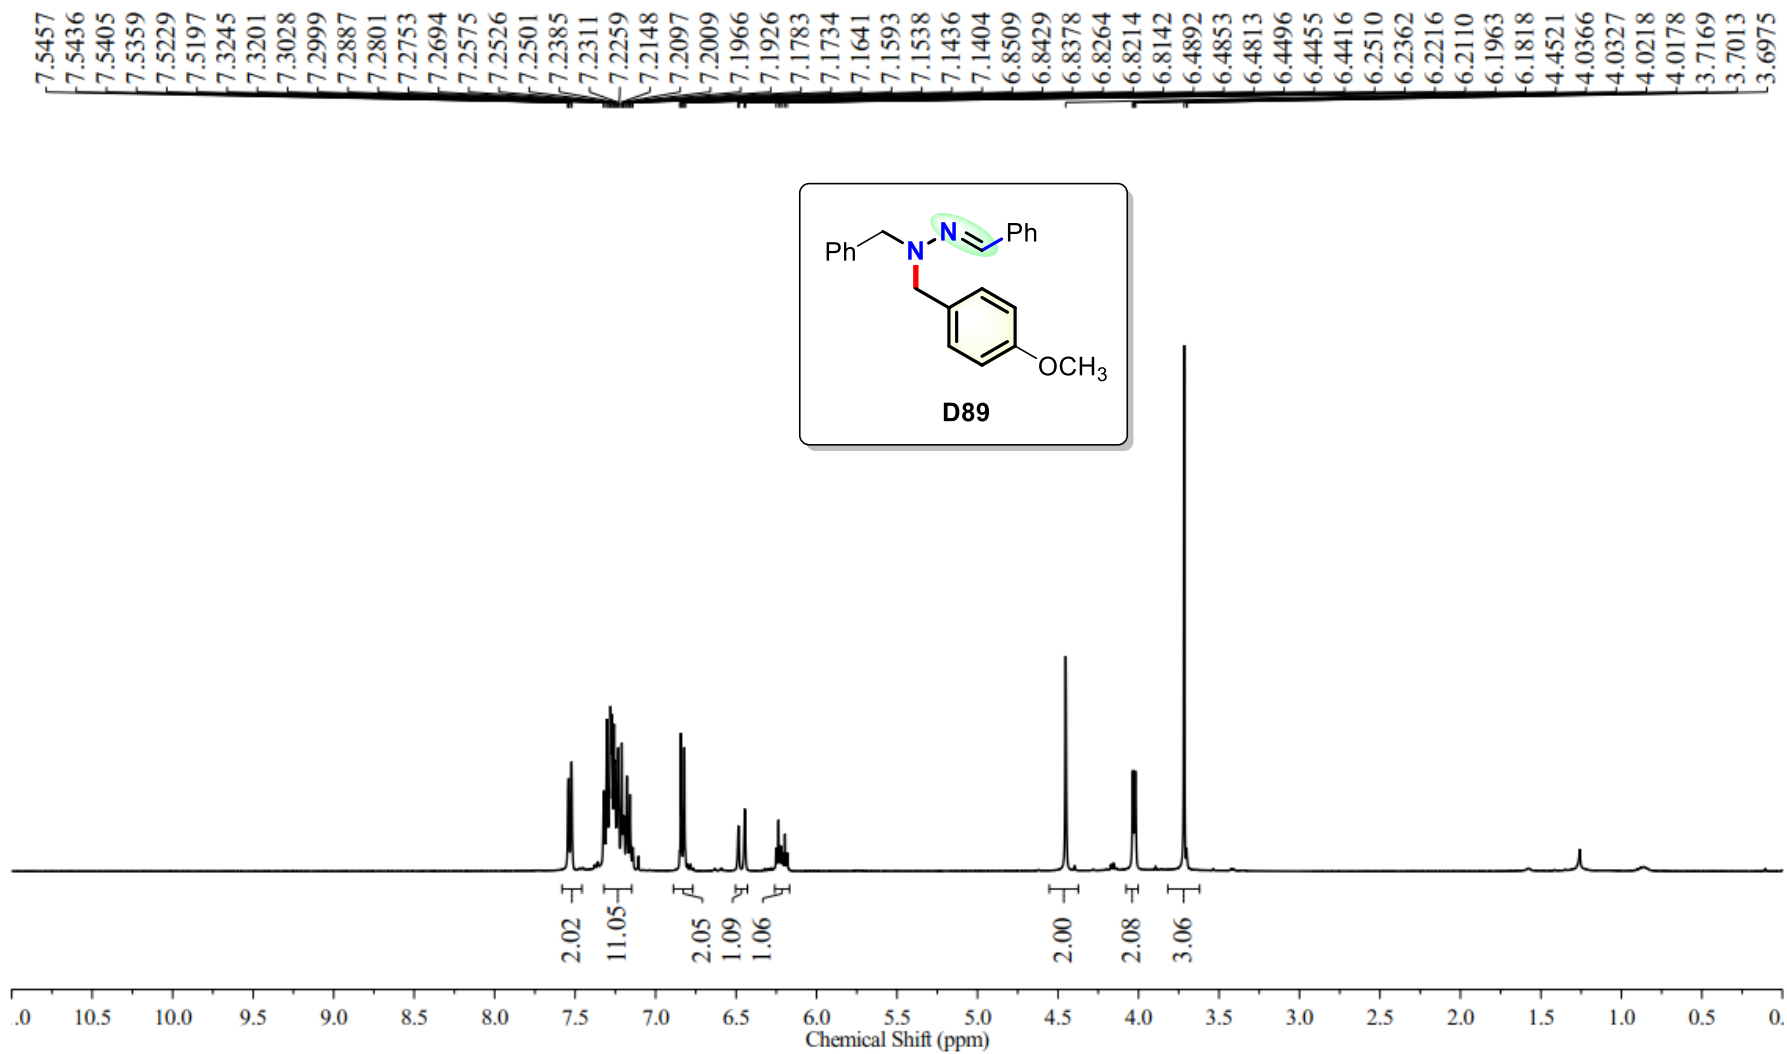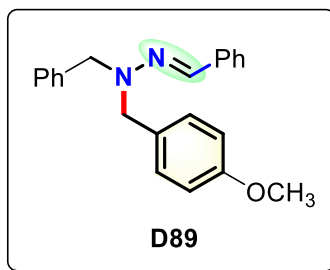

2022-07-19-YY0059-616-L-B5.10.fid

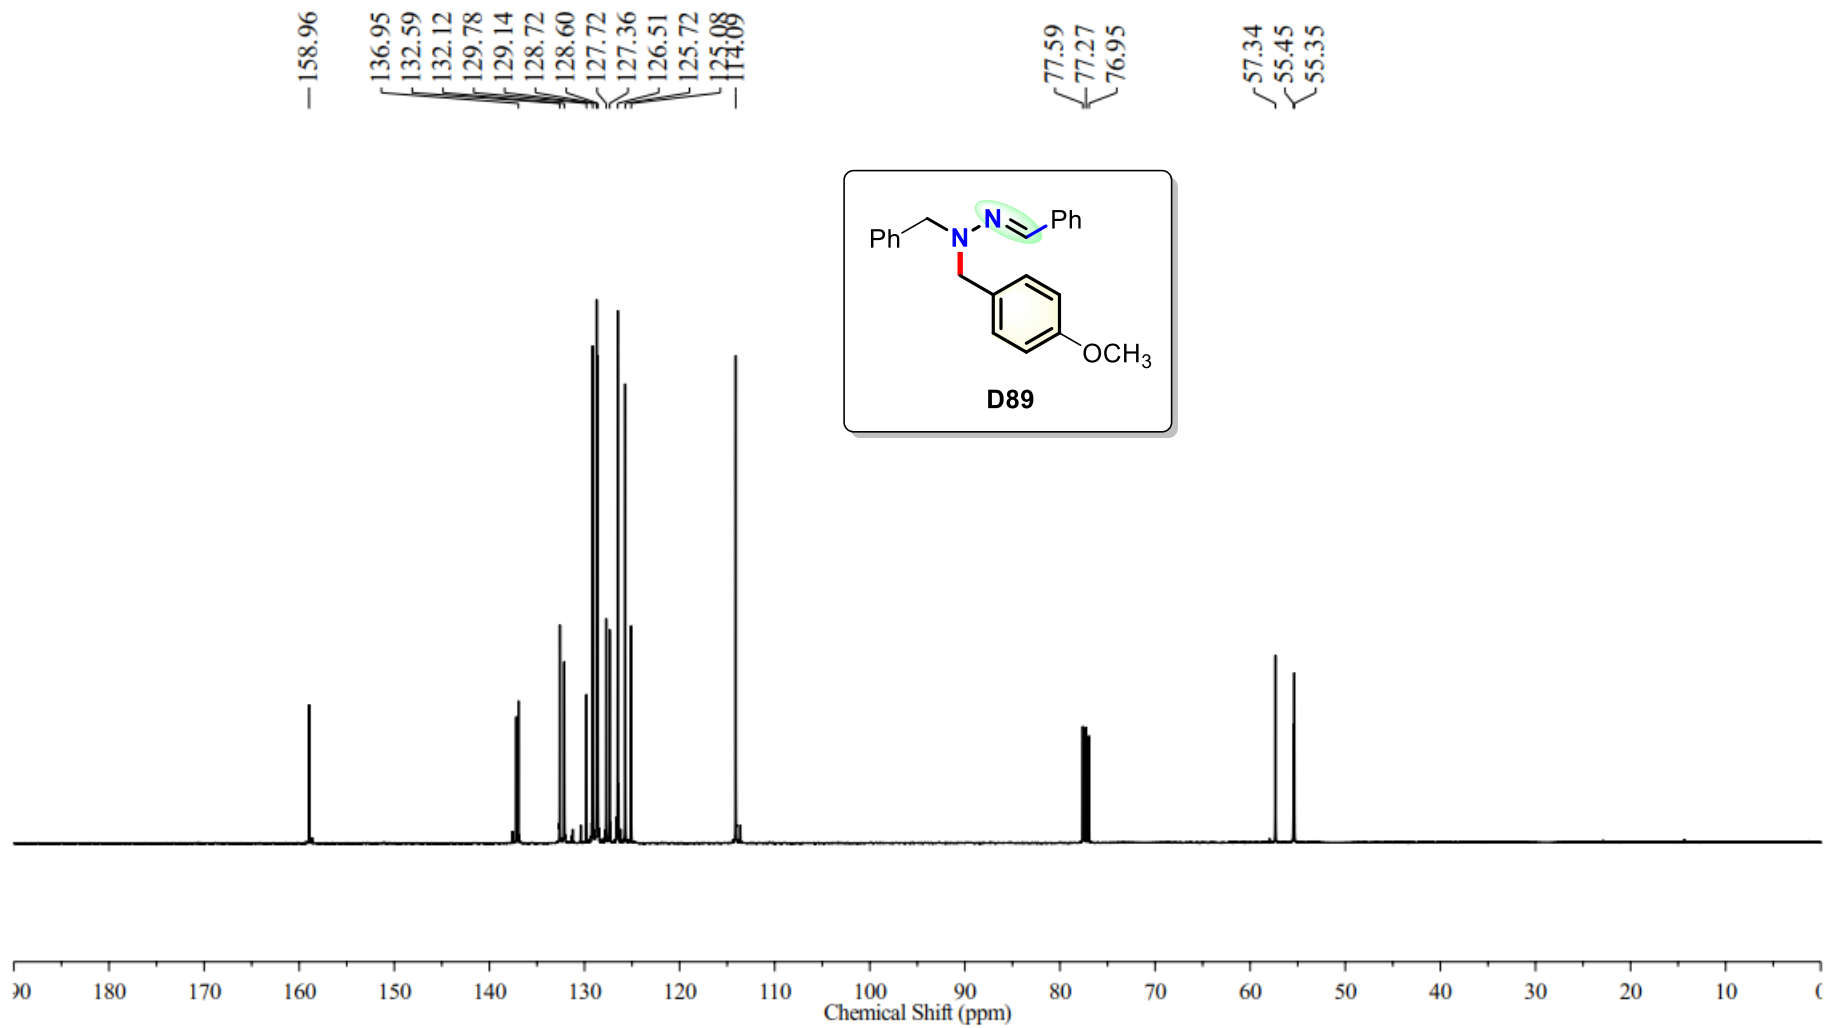

2022-6-14 YY0007-616-L-B7.10.fid

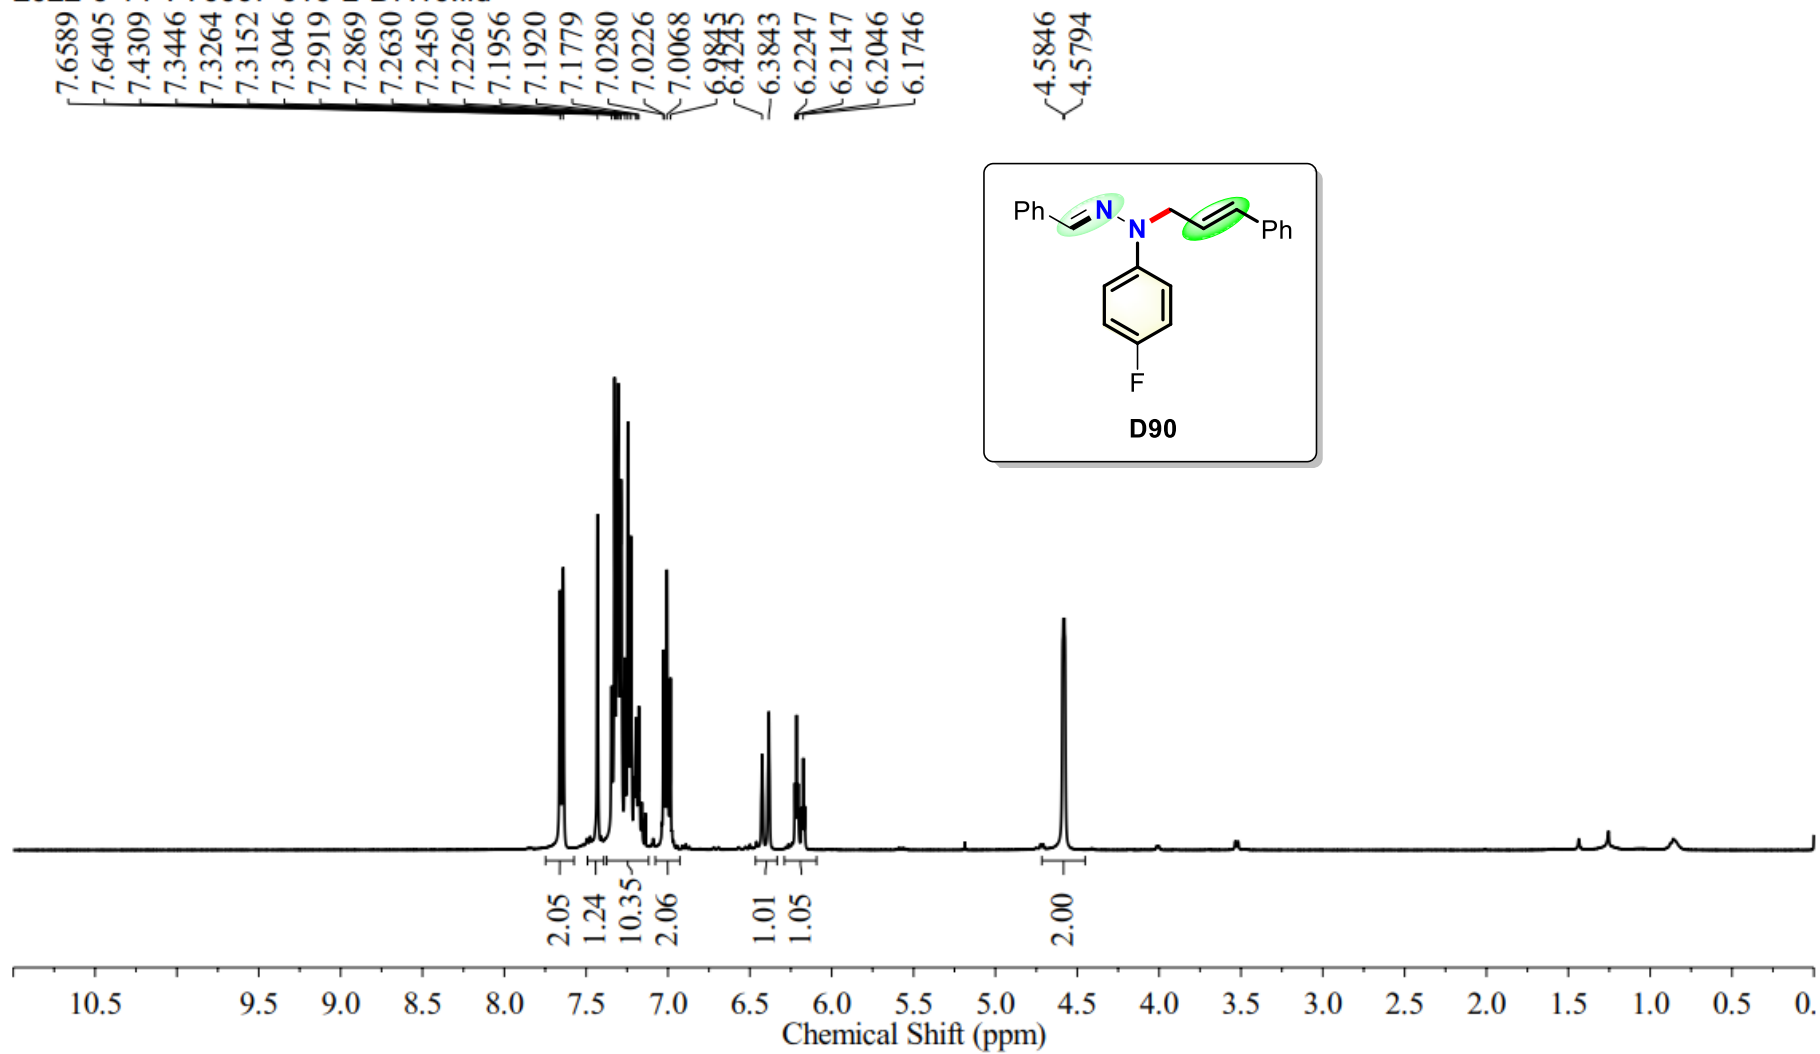

2022-6-15 yy0008-616-1qq-b7.10.fid

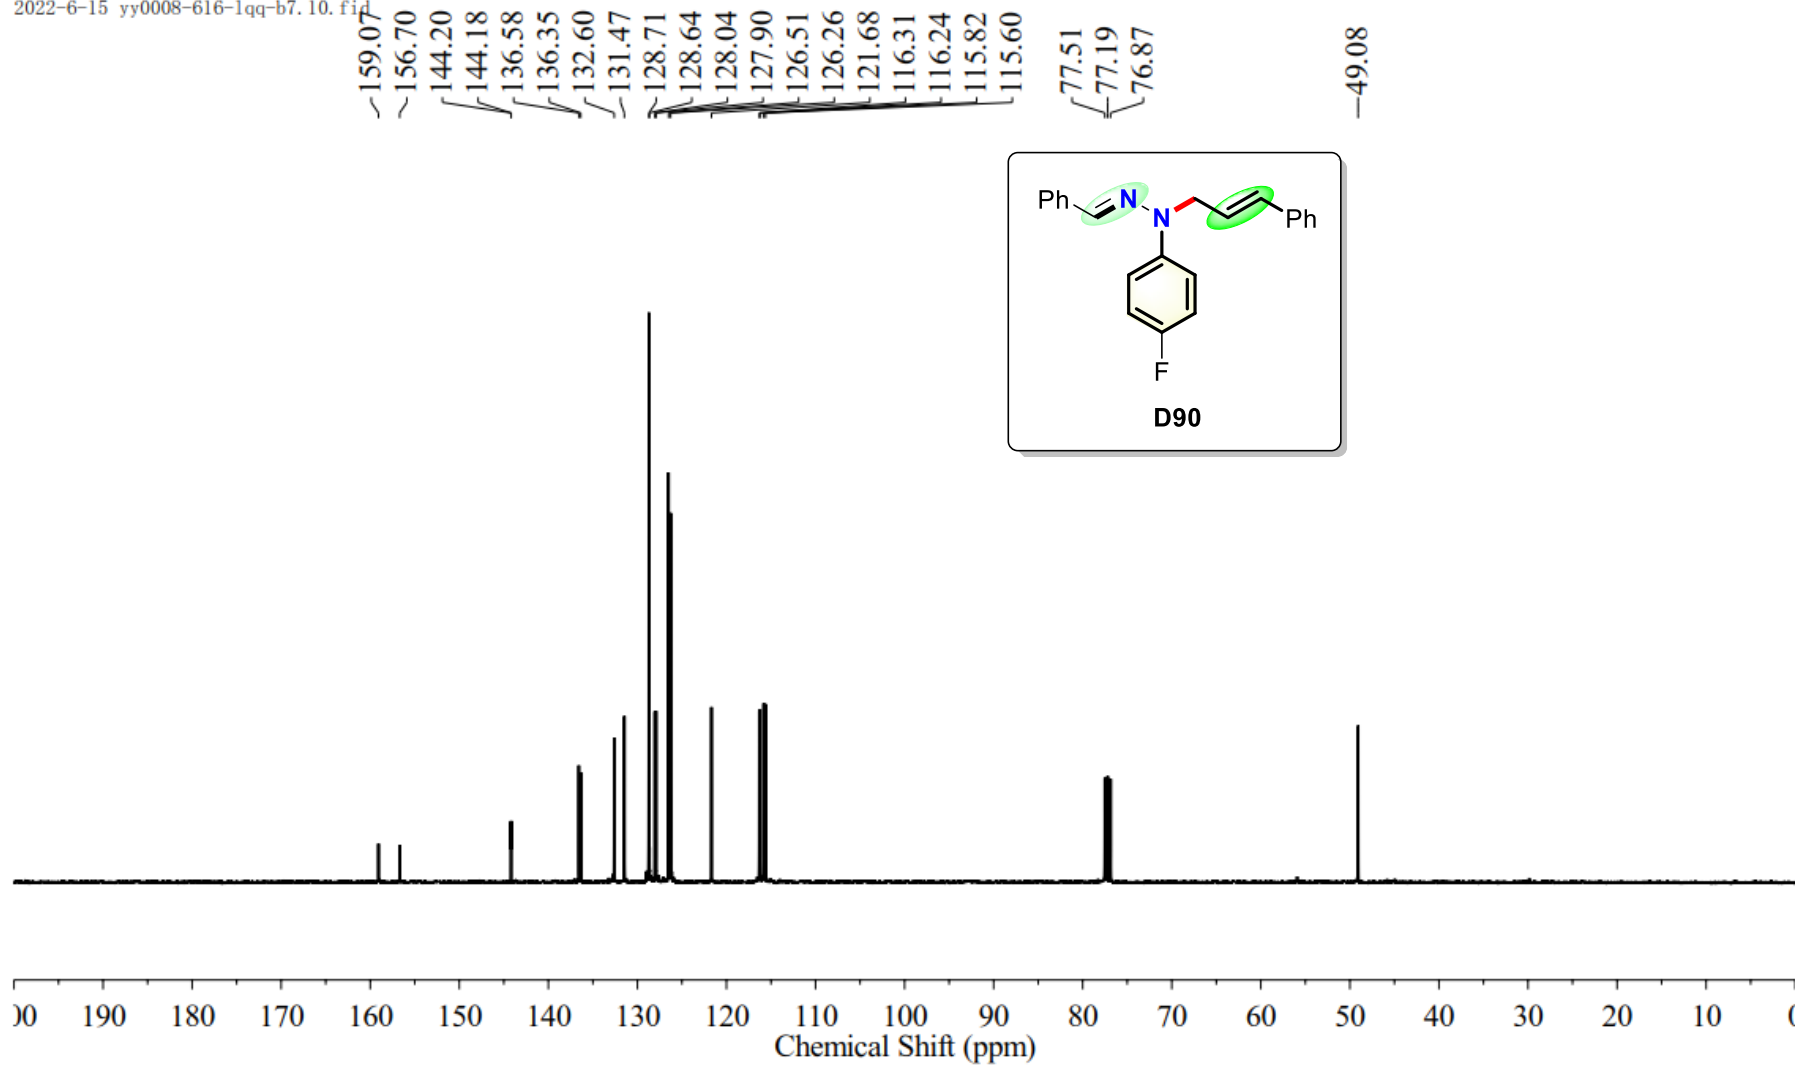

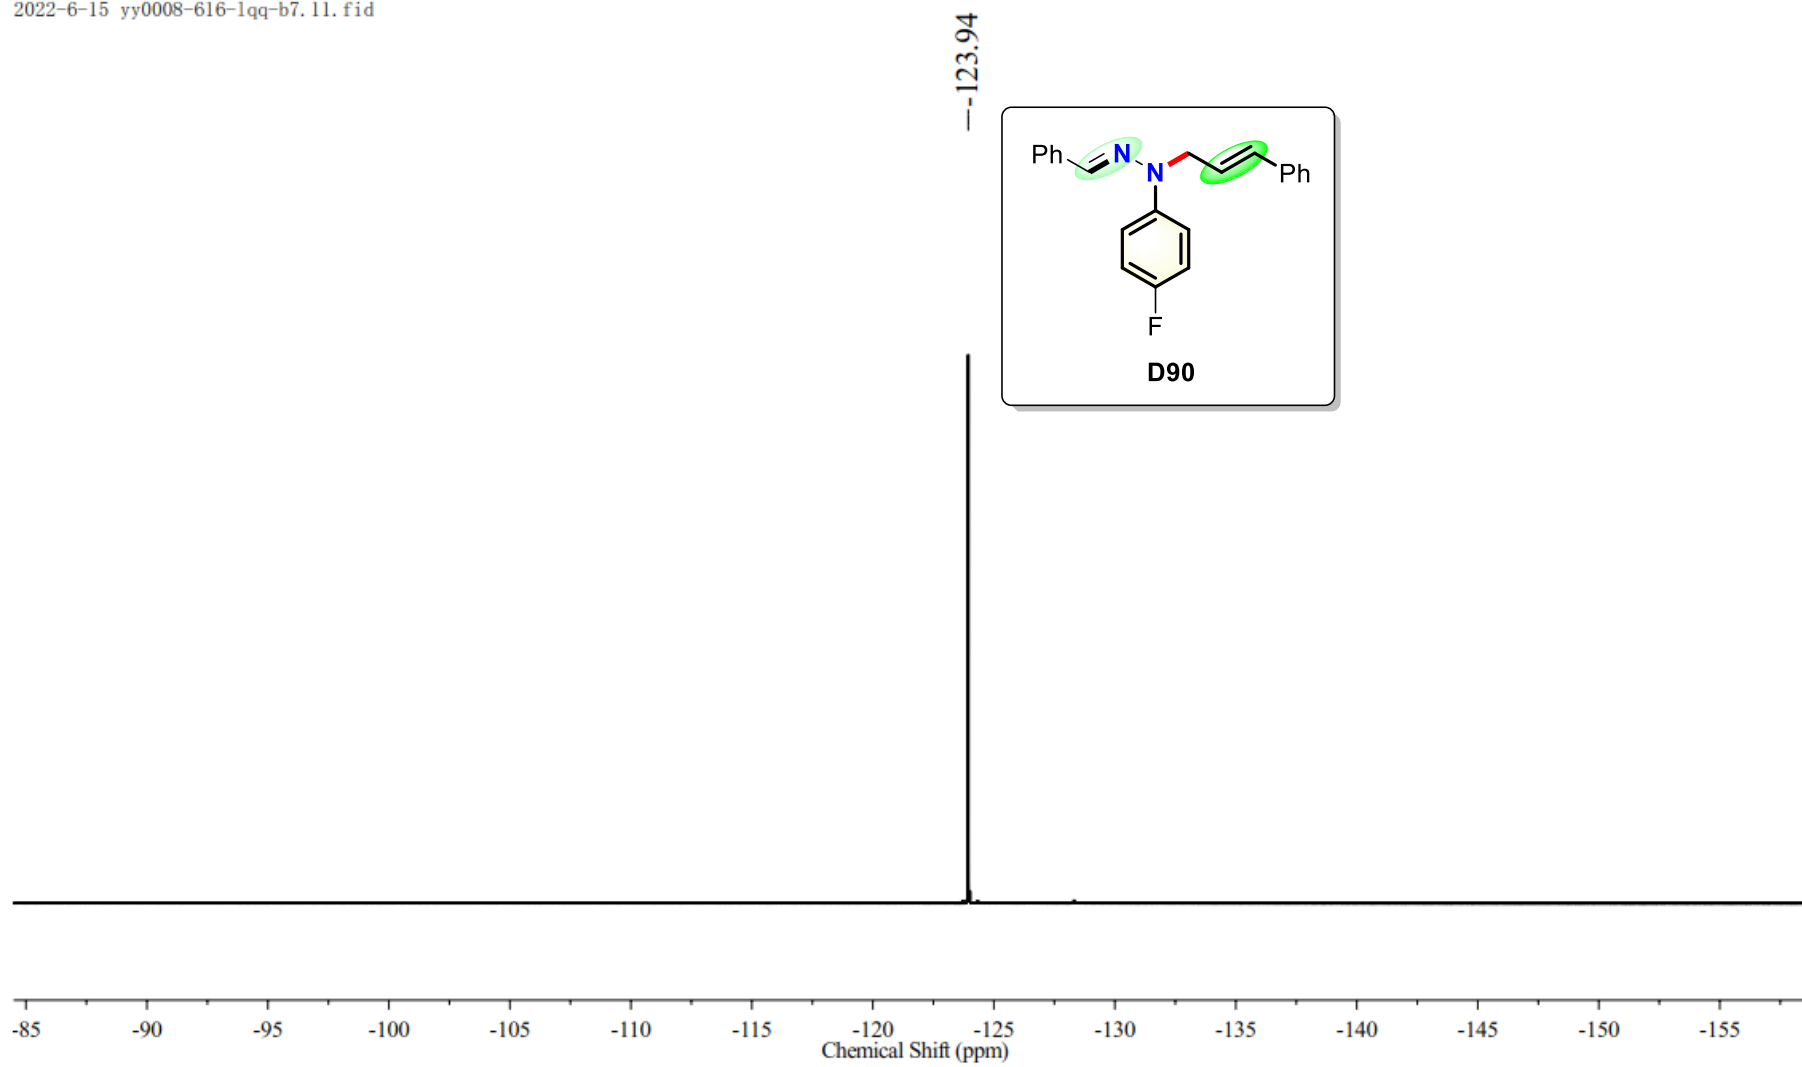

2022-6-17 yy0011-616-1-b13.10.fid

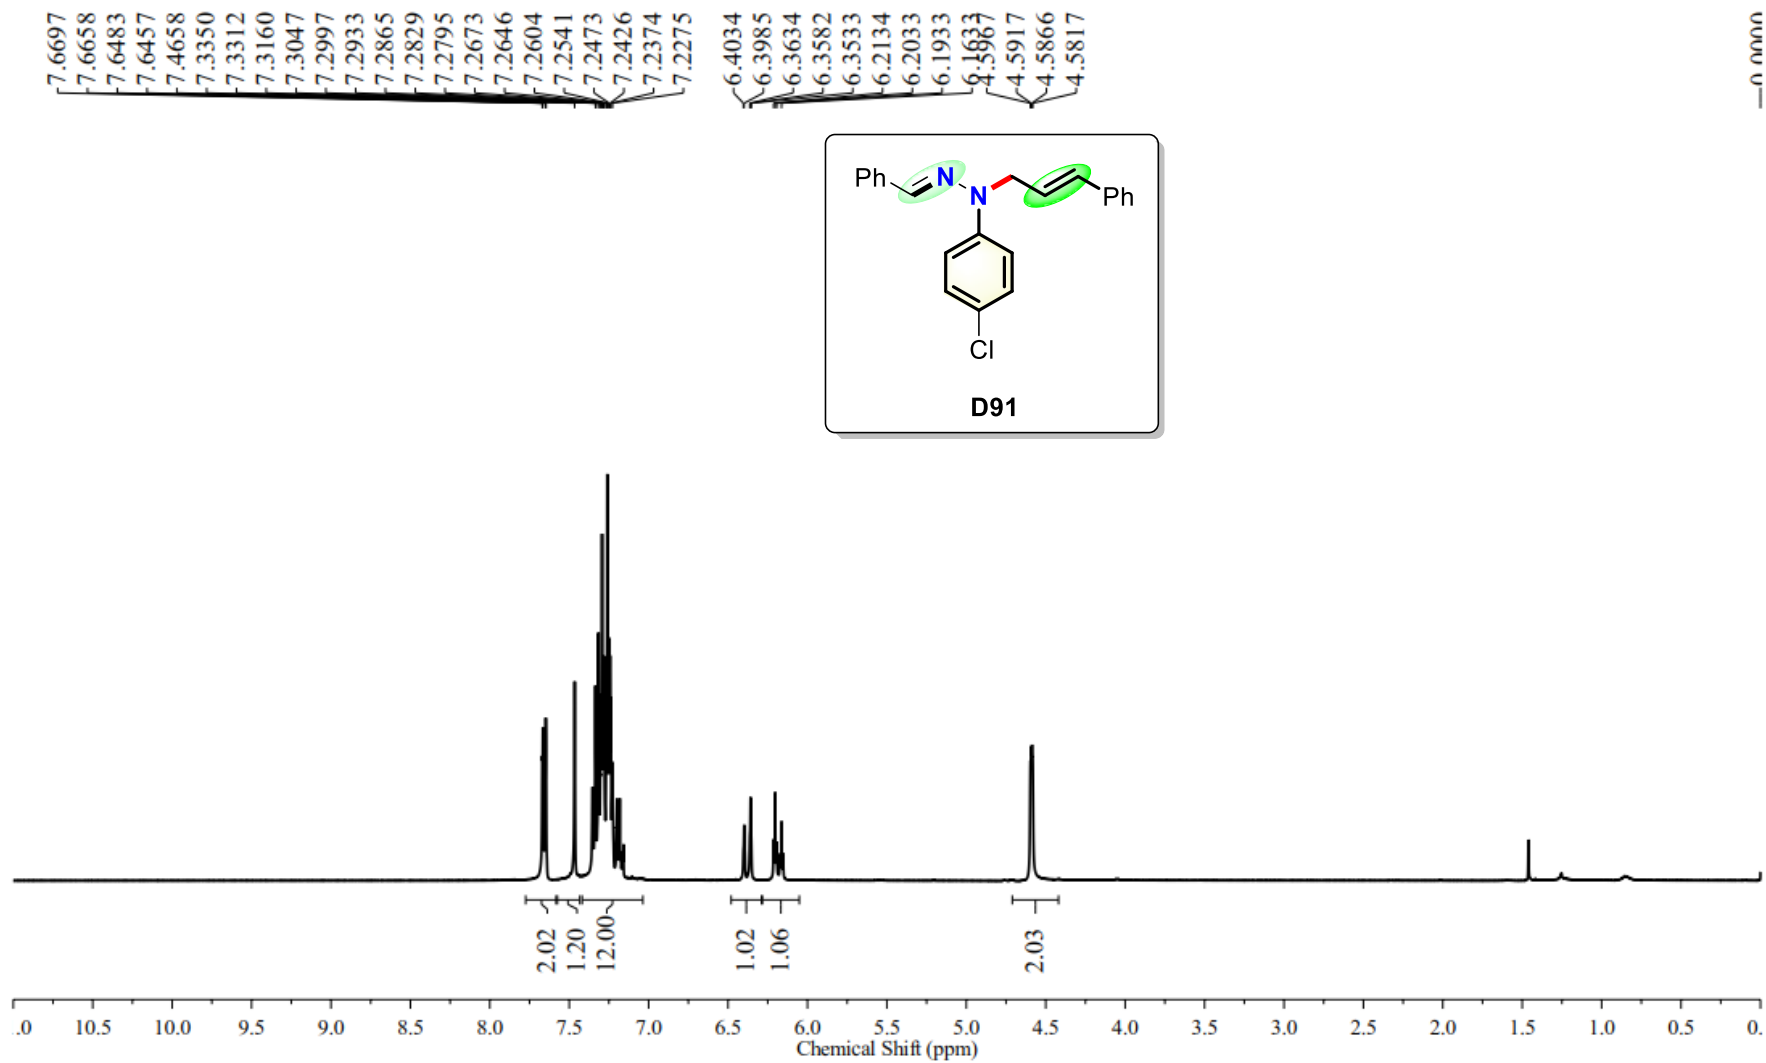



2022-06-20 yy0016-616-Lqq-B13.10.fid

146.21  
136.36  
136.25  
133.20  
131.53  
129.09  
128.72  
128.70  
128.25  
127.93  
126.50  
126.46  
126.39  
125.58  
121.31  
115.95

77.50  
77.18  
76.86

48.36

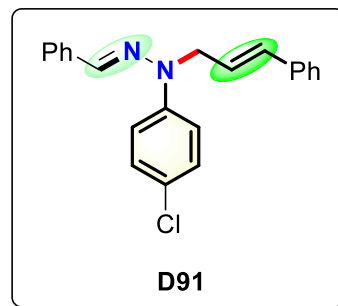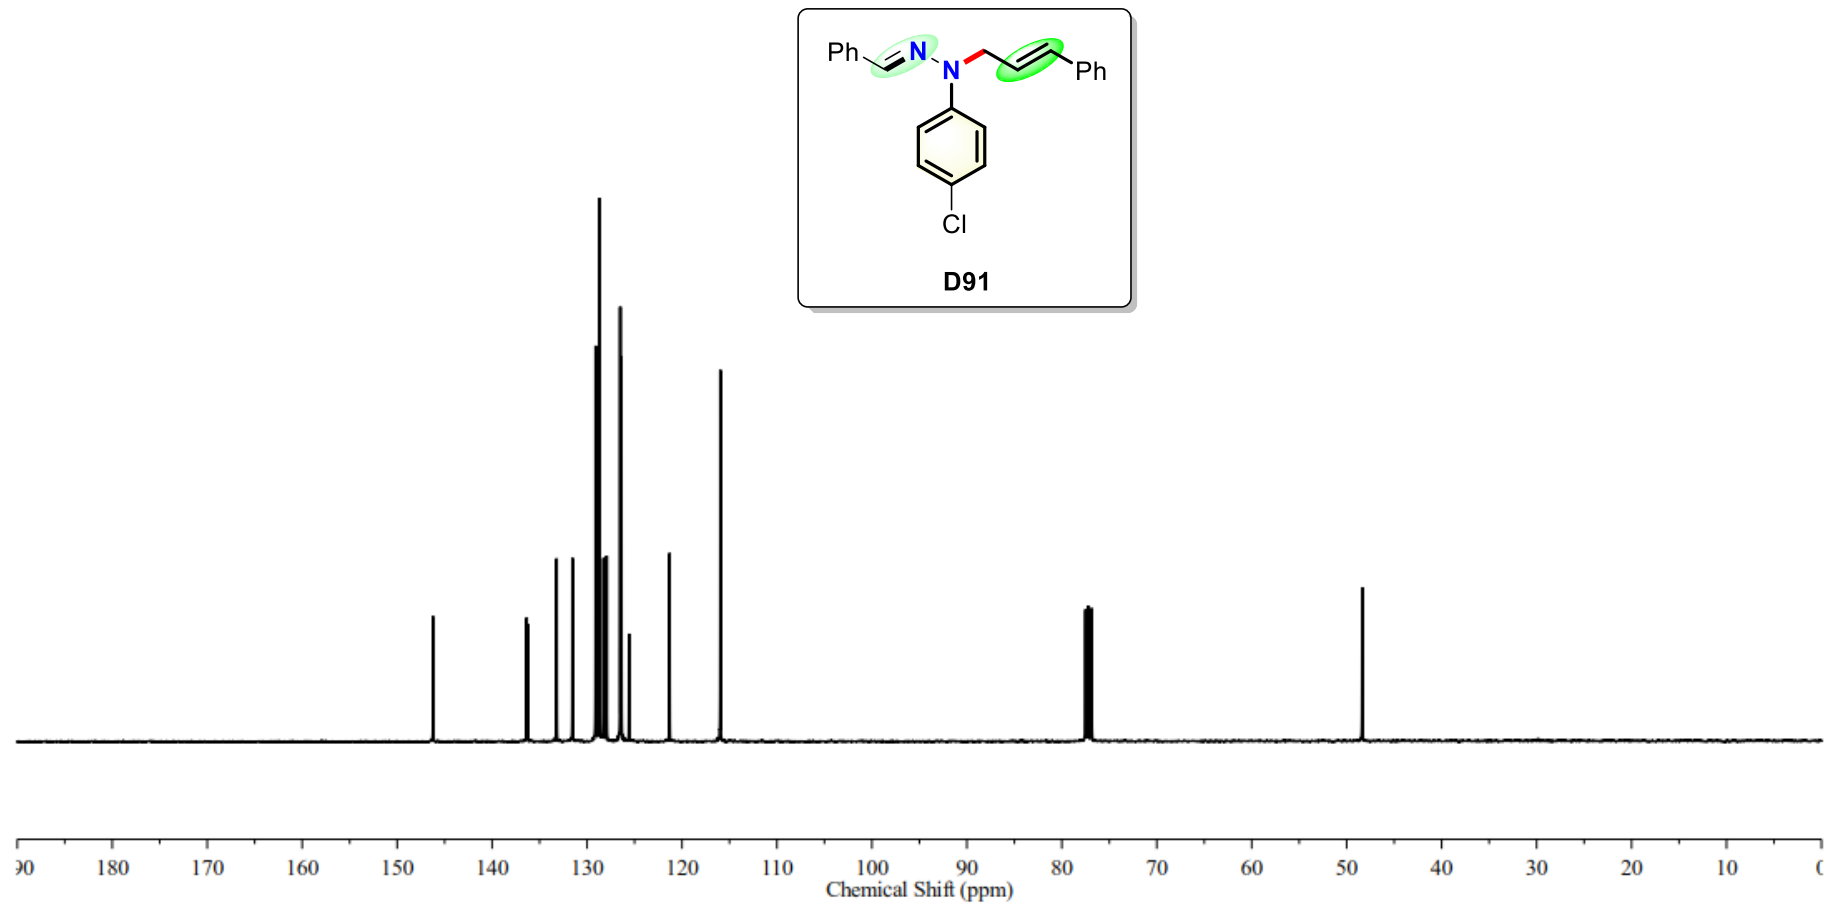

2022-6-20 yy0027 616-lqq-12.10.fid

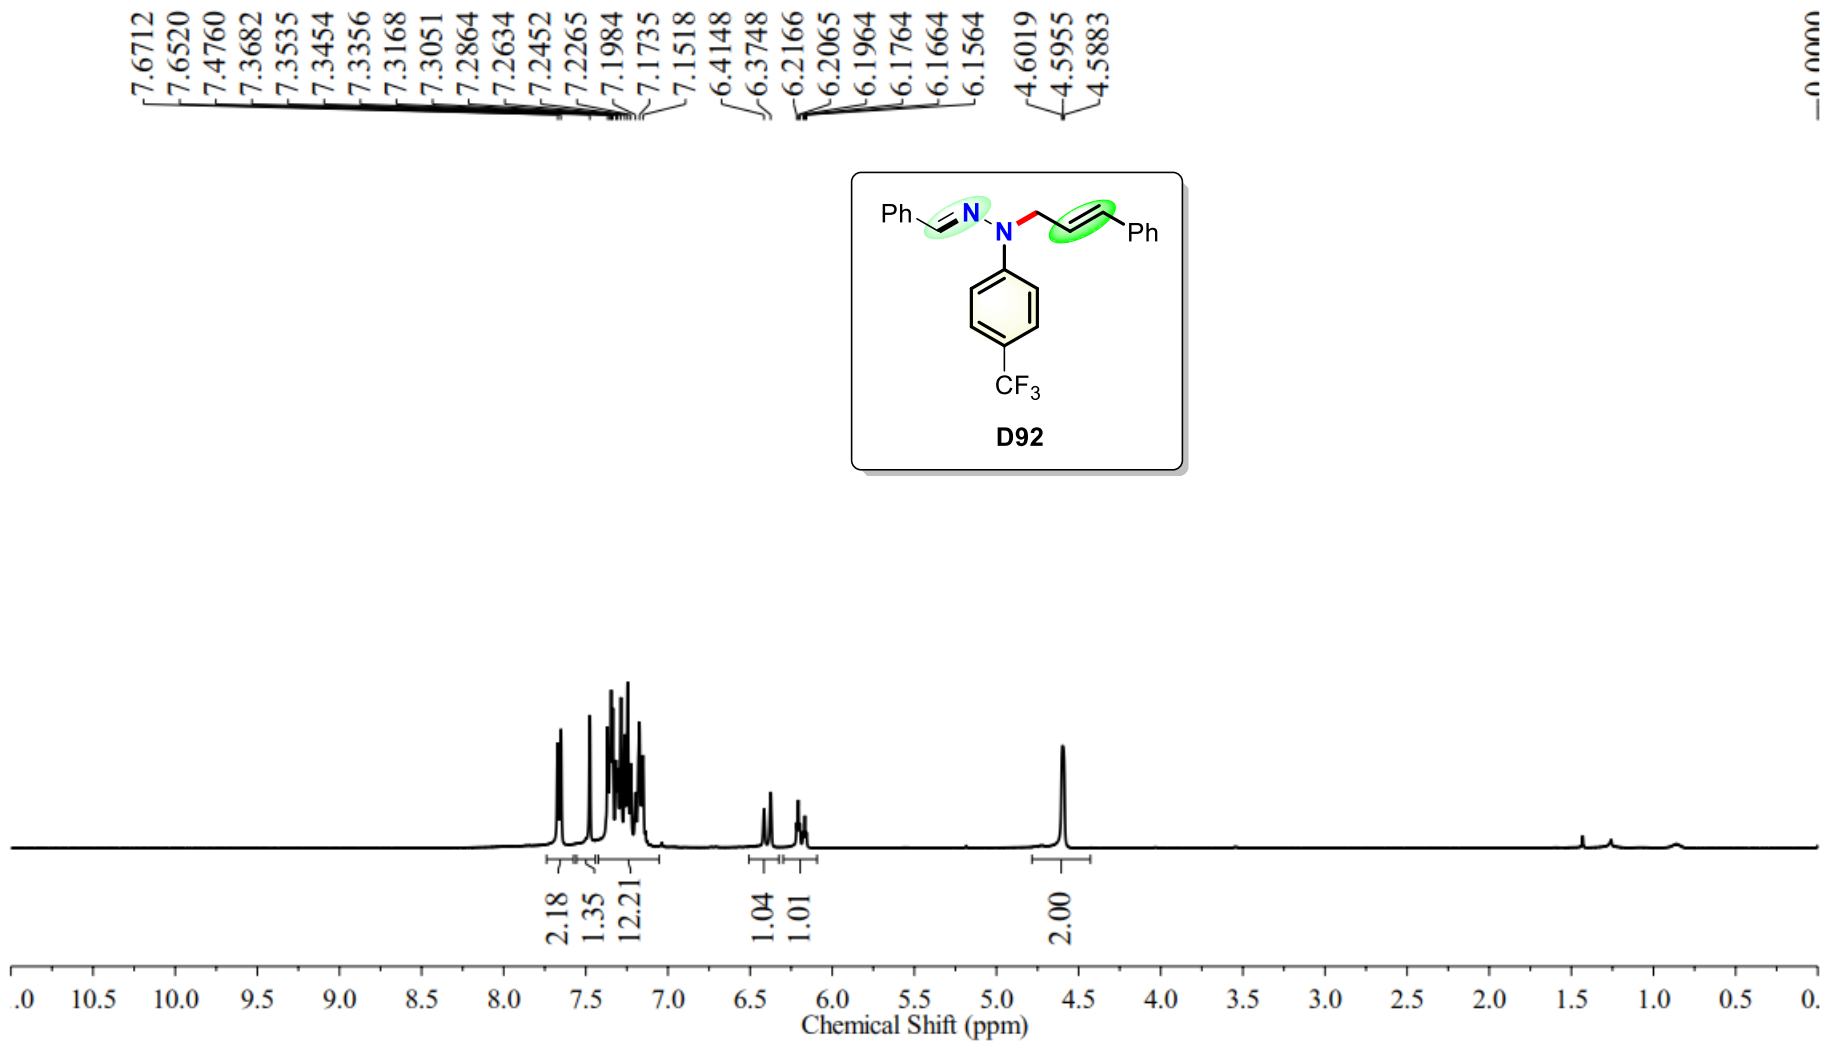

2022-06-21 yy0025 616-lqq-12.10.fid

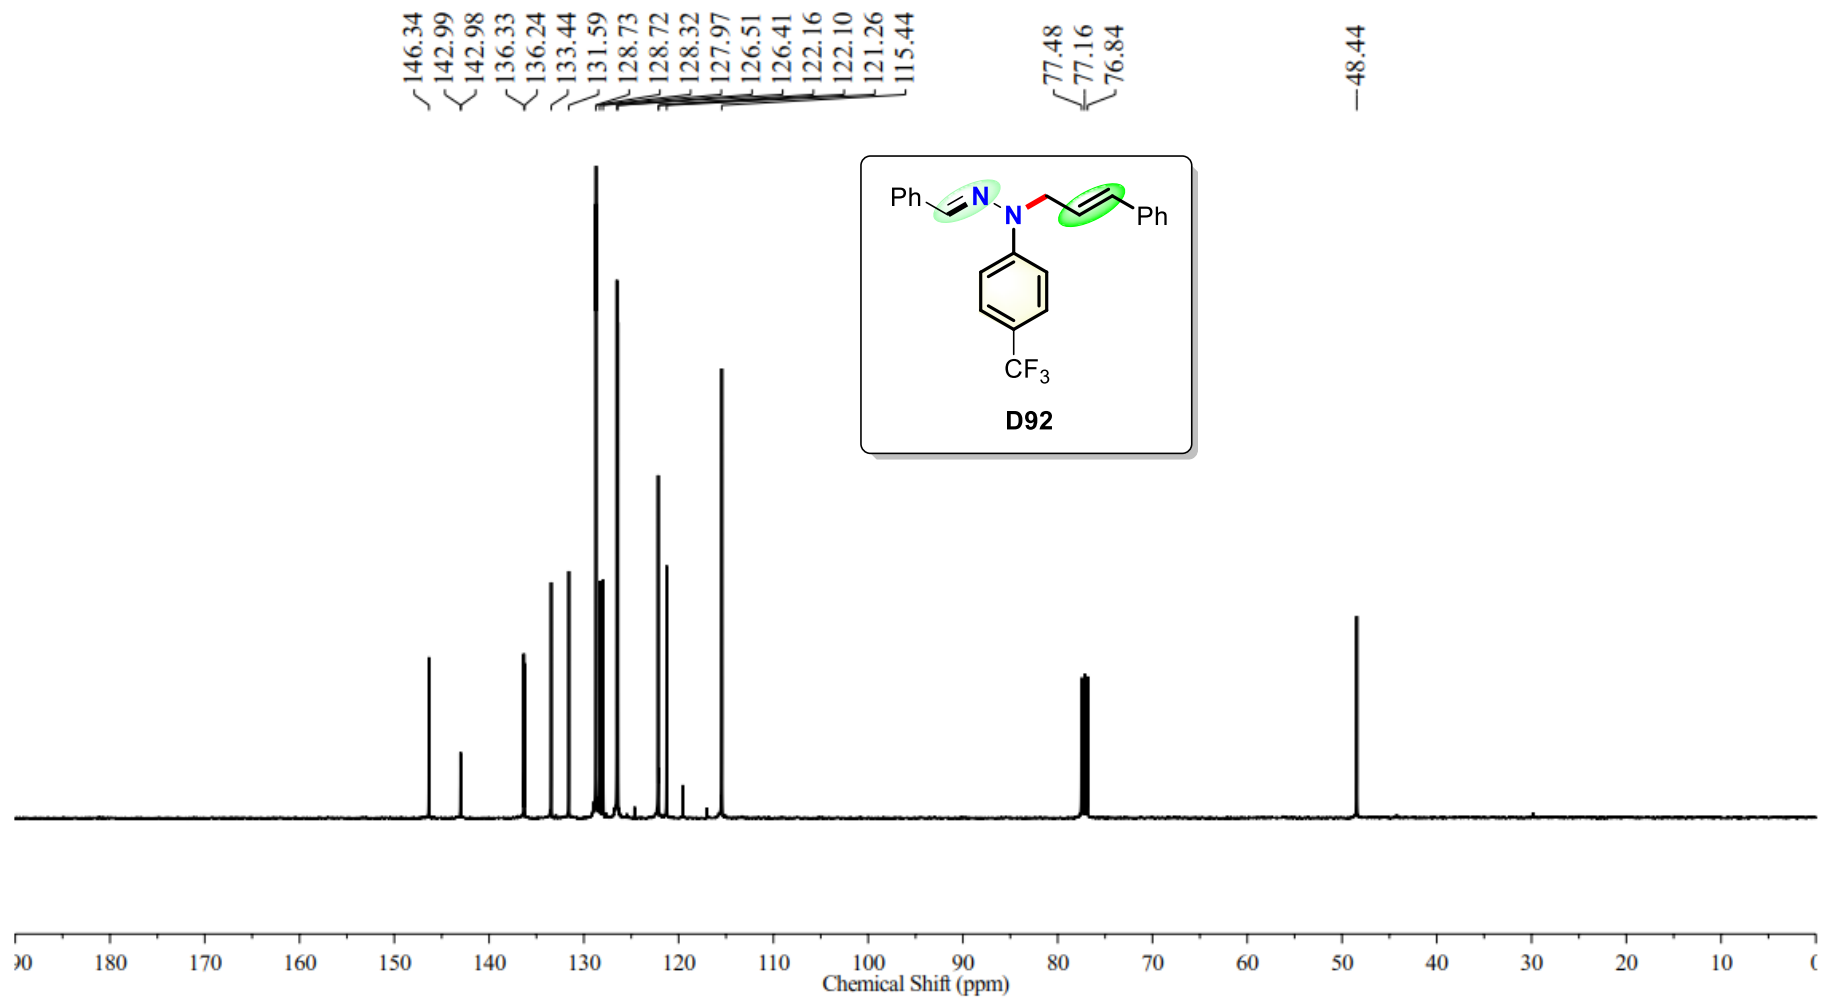

2022-06-21 yy0025 616-lqq-12.11.fid

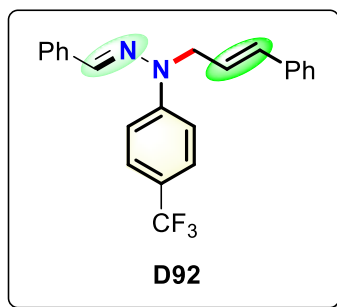

--58.05

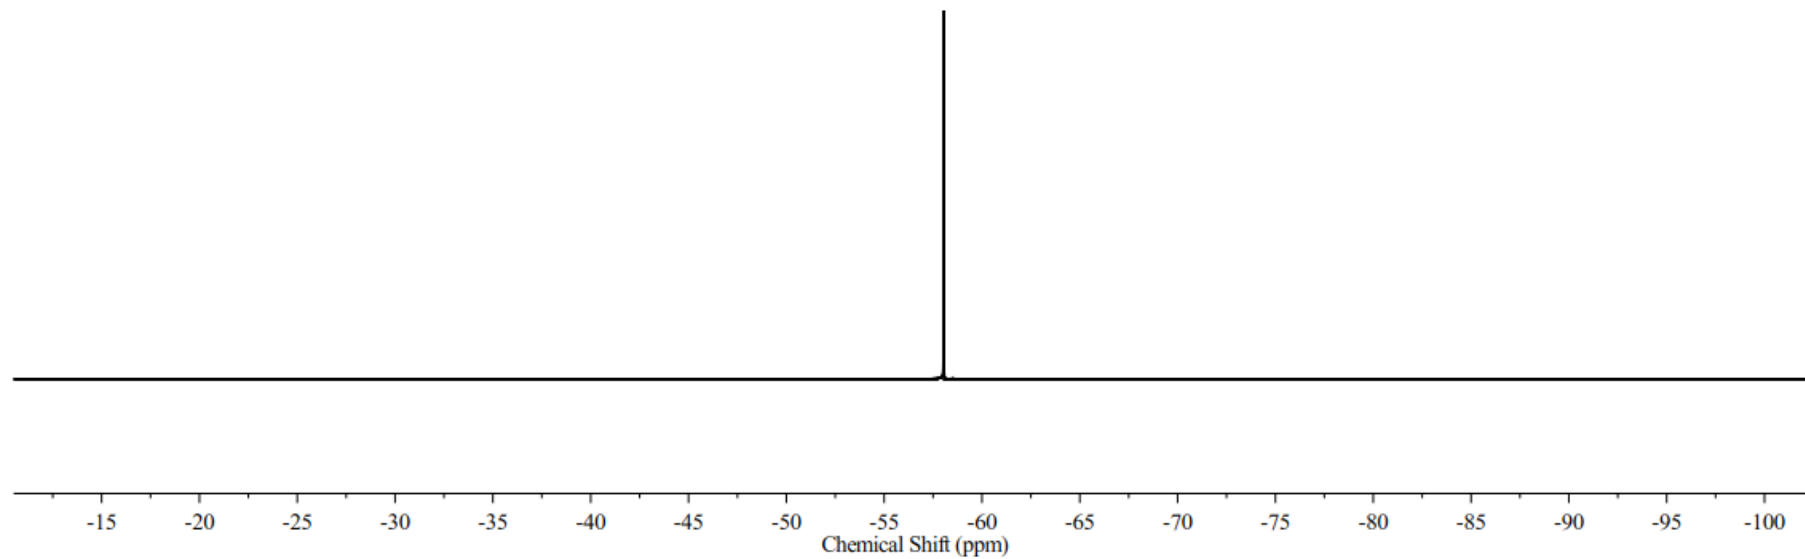

Supplement: d3qo01890c1.pdf [file d3qo01890c1.pdf]
